# Supplementary material for: Large-scale association analysis identified novel differentiated thyroid carcinoma risk loci by integrating transcriptome and proteome
Source: Research Square preprint supplement (doi:10.21203/rs.3.rs-6751995/v1), 2025-07-18
Supplement: Supplementary file 1 [file 0b4c1cb031e39ef252a52269.xlsx]

## Sheet: Contents
	Contents
	Supplementary Table 1	Genome-wide association study analysis result that are identified across all studies
	Supplementary Table 2	Transcriptome-wide association study results using thyroid-relevant tissues from GTEx including thyroid, whole blood, pituatary, and brain hypothalamus
	Supplementary Table 3	Result of Baysian colocalization analysis of transcriptome (eQTLs) with differentiated thyroid carcinoma (DTC)
	Supplementary Table 4	FOCUS fine mapping analysis results of DTC identified genes across 49 tissues
	Supplementary Table 5	Results of transcriptome-wide association study (TWAS) using all 49 available tissues from GTEx
	Supplementary Table 6	Results of transcriptome-wide association study (TWAS) using thyroid cancer tissue from TCGA databse
	Supplementary Table 7	Results of brain and plasma blood proteome-wide association study (PWAS) using ROSMAP and AIRC study
	Supplementary Table 8	Result of Baysian colocalization analysis of proteome (pQTL) with differentiated thyroid carcinoma (DTC)
	Supplementary Table 9	Gene Set Enrichment Analysis of pathways and biological processes associated with identified genes from GWAS, TWAS and PWAS
	Supplementary Table 10	Effect estimates used in the PRS model in the study group EPIC and EPITYHR
	Supplementary Table 11	Comparison of MR casual estimates between MVMR and IVW (different clumping thresholds)

## Sheet: S5
Supplementary Table 5. Results of transcriptome-wide association study (TWAS) using all 49 available tissues from GTEx
R2: A cross-validated R2 of tissue model's correlation to gene's measured transcriptome (prediction performance)
Gene	chromosome	start_position	end_position	R2	TWAS.Z	TWAS.P	Tissue
FOXE1	9	97853226	97856717	0.451965	19.0576	5.67928e-81	Testis
DIRC3	2	217284019	217756593	0.132459	13.5036	1.48949e-41	Skin_Not_Sun_Exposed_Suprapubic
NRG1	8	31639222	32855666	0.4949	13.4843	1.93607e-41	Thyroid
TRMO	9	97904489	97922500	0.487746	-12.4736	1.04015e-35	Testis
TGFB2	1	218345336	218444619	0.144928	-11.2455	2.4372e-29	Thyroid
LINC00609	14	36070427	36165288	0.0366471	-10.9547	6.30985e-28	Brain_Cortex
HEMGN	9	97926791	97944856	0.0278997	-10.6761	1.31732e-26	Testis
IGFBP2	2	216632828	216664436	0.0222738	-10.6014	2.9367e-26	Spleen
NANS	9	98056732	98083077	0.0585631	-10.558	4.66377e-26	Brain_Anterior_cingulate_cortex_BA24
PTCSC2	9	97699625	97853080	0.127828	-10.5255	6.58997e-26	Thyroid
NCBP1	9	97633668	97673748	0.0115914	-10.4686	1.20389e-25	Muscle_Skeletal
PTCSC3	14	36130677	36217284	0.143401	9.79461	1.18759e-22	Thyroid
TSTD2	9	97600080	97633368	0.0174862	9.75713	1.71948e-22	Skin_Sun_Exposed_Lower_leg
SMAD3	15	67063763	67195173	0.214603	-9.53876	1.4455e-21	Thyroid
STN1	10	103856806	103918332	0.0444953	-8.21472	2.12658e-16	Brain_Cerebellar_Hemisphere
XPA	9	97674909	97697340	0.0259096	8.03543	9.32535e-16	Brain_Cerebellar_Hemisphere
NRG1-IT3	8	32440704	32448803	0.0127915	-7.91398	2.4929e-15	Testis
AAGAB	15	67200667	67255195	0.0189402	-7.65404	1.94764e-14	Whole_Blood
EPB41L4A-AS1	5	112160526	112164818	0.0189339	7.58439	3.34067e-14	Heart_Left_Ventricle
LINC01229	16	79676048	79809716	0.0886027	7.53243	4.98054e-14	Testis
MYNN	3	169773396	169789716	0.0173088	-7.40599	1.30177e-13	Cells_Cultured_fibroblasts
TERT	5	1253147	1295068	0.0245199	-7.31275	2.61723e-13	Skin_Sun_Exposed_Lower_leg
SDCCAG8	1	243256034	243500091	0.205139	7.295	2.9865e-13	Ovary
TRIM14	9	98069275	98119222	0.0816281	7.24284	4.39382e-13	Skin_Not_Sun_Exposed_Suprapubic
ACTRT3	3	169766921	169769561	0.0200507	7.13281	9.83412e-13	Cells_Cultured_fibroblasts
TDRD7	9	97412096	97496125	0.0227463	-7.11864	1.08997e-12	Adrenal_Gland
MBIP	14	36298564	36320637	0.0131138	6.95049	3.64021e-12	Skin_Sun_Exposed_Lower_leg
SLK	10	103967140	104029233	0.02445	6.86869	6.4792e-12	Artery_Tibial
LRRC34	3	169793003	169812986	0.101898	6.85373	7.195e-12	Uterus
NFKBIA	14	35401079	35404749	0.0148569	6.80545	1.00736e-11	Lung
SLC29A1	6	44219553	44234142	0.0233617	-6.76733	1.31184e-11	Small_Intestine_Terminal_Ileum
LRRIQ4	3	169812870	169837773	0.0316588	-6.32004	2.61501e-10	Cells_Cultured_fibroblasts
ANP32B	9	97983341	98015943	0.0323985	6.31275	2.74129e-10	Brain_Hippocampus
KNL1	15	40594020	40664342	0.0178821	6.22483	4.82069e-10	Skin_Sun_Exposed_Lower_leg
HAUS6	9	19053141	19102904	0.226829	-6.19187	5.94554e-10	Cells_Cultured_fibroblasts
ZNF257	19	22052430	22091480	0.133575	6.04758	1.47036e-09	Cells_EBV-transformed_lymphocytes
MAFTRR	16	79715220	79770651	0.209511	-5.99091	2.08667e-09	Brain_Cerebellum
CEP170	1	243124428	243255348	0.0847448	5.91138	3.39248e-09	Whole_Blood
SAMD4A	14	54566117	54793315	0.0635815	5.89485	3.75013e-09	Thyroid
TMOD1	9	97501180	97601743	0.0150749	-5.82334	5.76826e-09	Thyroid
RAD51-AS1	15	40686183	40695107	0.0369917	-5.80992	6.25017e-09	Thyroid
PLIN2	9	19108375	19149290	0.0194424	-5.76593	8.12105e-09	Heart_Atrial_Appendage
SAXO1	9	18858906	19049358	0.0421775	-5.75924	8.44955e-09	Pituitary
ZNF723	19	22832291	22858667	0.0373911	5.69873	1.20706e-08	Ovary
CHST14	15	40470984	40473158	0.0214886	-5.69128	1.26088e-08	Thyroid
ZNF676	19	22179089	22215801	0.0315612	5.43298	5.54221e-08	Brain_Cerebellum
CLPTM1L	5	1317752	1345099	0.0588438	-5.42852	5.68239e-08	Skin_Sun_Exposed_Lower_leg
DLG5	10	77790791	77926755	0.305981	5.42561	5.77554e-08	Brain_Cerebellar_Hemisphere
RMDN3	15	40735884	40755851	0.0968949	5.40938	6.32443e-08	Brain_Spinal_cord_cervical_c-1
CCDC32	15	40528683	40565054	0.338388	5.37334	7.72909e-08	Thyroid
SPINT1-AS1	15	40835808	40844442	0.0222784	-5.22801	1.71346e-07	Prostate
ACSL6	5	131949973	132012243	0.0234661	5.22066	1.78283e-07	Liver
GALNT12	9	98807670	98850081	0.0186687	-5.15471	2.54019e-07	Prostate
GPR37	7	124743885	124765792	0.140985	-5.10276	3.34737e-07	Lung
CCDC117	22	28772674	28789301	0.0246552	5.08194	3.73605e-07	Spleen
TYMS	18	657653	673578	0.158415	5.07074	3.96275e-07	Esophagus_Mucosa
ANKRD44	2	196967017	197311173	0.0717908	-5.06962	3.98606e-07	Cells_Cultured_fibroblasts
MECOM	3	169083499	169663775	0.0543355	5.02446	5.04857e-07	Thyroid
ENOSF1	18	670318	712662	0.228798	5.01477	5.30958e-07	Colon_Transverse
RAPGEF6	5	131423921	131635231	0.0935382	4.94461	7.6298e-07	Uterus
GTPBP2	6	43605316	43629264	0.0910111	-4.92871	8.27745e-07	Cells_EBV-transformed_lymphocytes
MPHOSPH6	16	82147798	82170224	0.108801	4.89396	9.88291e-07	Artery_Aorta
PNP	14	20461992	20477094	0.490155	4.86641	1.13644e-06	Esophagus_Mucosa
INSR	19	7112255	7294414	0.0398741	4.86042	1.17135e-06	Colon_Sigmoid
CORO2A	9	98120975	98192637	0.0711085	4.82556	1.39612e-06	Breast_Mammary_Tissue
KBTBD7	13	41189834	41194569	0.0130113	-4.79707	1.61e-06	Skin_Not_Sun_Exposed_Suprapubic
CCNT2-AS1	2	134735464	134918712	0.0286174	4.69336	2.68748e-06	Cells_Cultured_fibroblasts
ZNF729	19	22286441	22317176	0.226525	-4.64295	3.43469e-06	Testis
PLD1	3	171600404	171810950	0.154675	-4.6226	3.78956e-06	Esophagus_Muscularis
CDCA7L	7	21900899	21945903	0.0313897	4.61583	3.91533e-06	Lung
PCNX2	1	232983435	233295725	0.0275435	4.59543	4.31856e-06	Breast_Mammary_Tissue
MEX3C	18	51174550	51218333	0.0569057	-4.59506	4.32619e-06	Minor_Salivary_Gland
POT1	7	124822386	124929983	0.0649878	-4.5933	4.3629e-06	Artery_Coronary
PML	15	73994673	74047827	0.0219447	-4.59201	4.39e-06	Pituitary
ERI1	8	9002147	9116746	0.0355423	-4.51322	6.38502e-06	Breast_Mammary_Tissue
SGK1	6	134169248	134318112	0.0694943	-4.50421	6.6619e-06	Thyroid
FCGR1A	1	149782671	149791675	0.0154567	-4.5042	6.66245e-06	Skin_Sun_Exposed_Lower_leg
SAMMSON	3	69999550	70518064	0.0214207	-4.49788	6.86333e-06	Testis
NEFH	22	29480218	29491390	0.119162	-4.45526	8.37914e-06	Nerve_Tibial
GCHFR	15	40764068	40767708	0.0274641	4.45225	8.49747e-06	Cells_EBV-transformed_lymphocytes
BAIAP2L2	22	38084652	38111015	0.0784846	-4.44842	8.65028e-06	Spleen
TBC1D23	3	100260992	100325251	0.118432	4.41745	9.98726e-06	Skin_Sun_Exposed_Lower_leg
MFSD14C	9	96949555	97013366	0.0638124	-4.41217	1.0234e-05	Brain_Hypothalamus
RBM19	12	113816738	113966325	0.285609	-4.40314	1.06697e-05	Adipose_Subcutaneous
FZD3	8	28494205	28574267	0.389783	-4.39235	1.12132e-05	Thyroid
SLC7A2	8	17497088	17570573	0.0314443	4.39229	1.12165e-05	Brain_Spinal_cord_cervical_c-1
BMF	15	40087890	40108892	0.010168	-4.37871	1.19382e-05	Whole_Blood
MAT2B	5	163503114	163519558	0.0134174	4.37161	1.23333e-05	Skin_Sun_Exposed_Lower_leg
TIPARP-AS1	3	156671859	156674446	0.335555	-4.37123	1.23551e-05	Minor_Salivary_Gland
DENND11	7	141656728	141702166	0.0659264	4.36729	1.25799e-05	Brain_Hippocampus
MARS2	2	197705369	197708395	0.0176302	-4.36425	1.27557e-05	Esophagus_Mucosa
TGFB2-AS1	1	218344190	218346036	0.0488162	-4.35737	1.31634e-05	Thyroid
ANO9	11	417933	442011	0.140698	-4.33296	1.47115e-05	Brain_Putamen_basal_ganglia
PLCL1	2	197804593	198572581	0.066786	4.31672	1.58364e-05	Thyroid
AAMP	2	218264129	218270178	0.0448689	4.3104	1.62961e-05	Heart_Atrial_Appendage
DNAJC17	15	40765161	40807478	0.10917	4.28121	1.85882e-05	Skin_Not_Sun_Exposed_Suprapubic
SF3B1	2	197388515	197435079	0.0506682	4.26463	2.00232e-05	Breast_Mammary_Tissue
TMEM163	2	134455759	134719000	0.0618464	4.22994	2.33753e-05	Prostate
HSPBAP1	3	122739999	122793831	0.0514221	4.22499	2.3895e-05	Cells_Cultured_fibroblasts
ACAT1	11	108116695	108147603	0.133028	-4.22296	2.41111e-05	Brain_Cerebellar_Hemisphere
ZNF510	9	96754553	96778129	0.0260324	4.218	2.46478e-05	Testis
YY1AP1	1	155659443	155689000	0.0285118	4.21738	2.47159e-05	Thyroid
PSMA6	14	35278633	35317493	0.0492646	-4.18355	2.86992e-05	Brain_Cerebellar_Hemisphere
RPS6KL1	14	74903951	74923302	0.116168	4.16332	3.13651e-05	Breast_Mammary_Tissue
LRRC74B	22	21045946	21064168	0.0392009	-4.15987	3.18428e-05	Esophagus_Mucosa
RTEL1	20	63657810	63696253	0.0535476	4.15592	3.23974e-05	Cells_Cultured_fibroblasts
BCKDHB	6	80106647	80346270	0.0164717	-4.14362	3.41872e-05	Testis
VAV3	1	107571161	107965180	0.0729136	-4.14258	3.43425e-05	Adipose_Visceral_Omentum
CTSV	9	97029677	97156556	0.0192952	-4.14221	3.43982e-05	Adipose_Subcutaneous
SLC35G5	8	11331012	11332360	0.102107	-4.142	3.44286e-05	Brain_Nucleus_accumbens_basal_ganglia
POT1-AS1	7	124929873	125482966	0.0314071	-4.14036	3.46762e-05	Adipose_Subcutaneous
MEIKIN	5	131806990	131945698	0.15751	4.13492	3.55074e-05	Liver
CTSZ	20	58985686	59008238	0.0451776	-4.12813	3.65731e-05	Whole_Blood
ANKS1A	6	34889255	35091406	0.0406254	4.12711	3.67352e-05	Ovary
MLLT3	9	20341669	20622499	0.0190308	-4.12551	3.69911e-05	Esophagus_Gastroesophageal_Junction
STARD13-AS	13	33180401	33281584	0.0482664	4.12534	3.70193e-05	Brain_Spinal_cord_cervical_c-1
RFTN2	2	197568224	197676045	0.0534638	4.12477	3.71098e-05	Pancreas
SGMS1-AS1	10	50623466	50641451	0.125974	4.11655	3.84584e-05	Cells_Cultured_fibroblasts
YES1	18	721588	812546	0.138292	-4.10325	4.07384e-05	Cells_Cultured_fibroblasts
SLC11A1	2	218382029	218396894	0.0497434	4.09675	4.19e-05	Brain_Hypothalamus
IGFBP5	2	216672105	216695549	0.0241041	-4.09401	4.23984e-05	Thyroid
ZFYVE19	15	40807086	40815084	0.10124	-4.09096	4.29592e-05	Minor_Salivary_Gland
SLC16A8	22	38078134	38084184	0.0226803	-4.07852	4.53241e-05	Esophagus_Mucosa
KBTBD6	13	41127569	41132802	0.0192617	4.06086	4.88914e-05	Spleen
TRPC4AP	20	35002404	35092807	0.100342	-4.04386	5.25788e-05	Skin_Sun_Exposed_Lower_leg
IQCH	15	67254786	67502260	0.104932	-4.04363	5.26291e-05	Testis
C16orf86	16	67666814	67668757	0.0429658	-4.04354	5.26506e-05	Adipose_Subcutaneous
RASIP1	19	48720585	48740610	0.178287	4.04275	5.28284e-05	Colon_Sigmoid
TCTEX1D1	1	66752459	66779047	0.0781435	-4.04025	5.33946e-05	Artery_Coronary
BBC3	19	47220822	47232766	0.0151972	-4.02982	5.58205e-05	Esophagus_Mucosa
PRAG1	8	8317736	8386439	0.508391	-4.02549	5.68561e-05	Thyroid
SLC2A4RG	20	63739776	63744050	0.035318	4.02034	5.81132e-05	Artery_Tibial
VKORC1	16	31090842	31095980	0.141365	3.99404	6.49566e-05	Kidney_Cortex
SLC22A5	5	132369710	132395613	0.257868	3.98831	6.65462e-05	Cells_EBV-transformed_lymphocytes
ZNF638	2	71276561	71435069	0.0100297	3.98198	6.83445e-05	Skin_Sun_Exposed_Lower_leg
ACKR2	3	42804752	42887974	0.0338372	-3.98096	6.86361e-05	Brain_Hypothalamus
EPB41L4A	5	112142441	112419313	0.0724256	3.9786	6.93217e-05	Brain_Cerebellar_Hemisphere
NUMBL	19	40665905	40690972	0.122747	-3.9683	7.23877e-05	Nerve_Tibial
DOCK10	2	224765090	225042468	0.0164821	-3.96145	7.44965e-05	Artery_Tibial
TYMSOS	18	630886	658350	0.203908	3.95638	7.60928e-05	Esophagus_Muscularis
ZNF99	19	22752183	22784151	0.0363057	3.95299	7.71817e-05	Heart_Atrial_Appendage
CDH22	20	46173739	46308498	0.0959109	-3.95089	7.78598e-05	Pancreas
IDH2	15	90083045	90102477	0.116636	3.94456	7.9948e-05	Heart_Left_Ventricle
MIR1915HG	10	21490272	21497260	0.0111306	3.93452	8.33623e-05	Lung
HECA	6	139135080	139180802	0.0158226	-3.93208	8.42157e-05	Cells_Cultured_fibroblasts
IFI27L1	14	94081301	94103846	0.330142	3.93033	8.48291e-05	Muscle_Skeletal
ZNF396	18	35366694	35377337	0.0939045	-3.9303	8.48391e-05	Cells_Cultured_fibroblasts
BSCL2	11	62689289	62709845	0.148213	3.9281	8.56209e-05	Artery_Coronary
HMMR	5	163460203	163491941	0.018037	-3.92519	8.66629e-05	Colon_Transverse
KLHL10	17	41835685	41848384	0.0236515	-3.92189	8.78567e-05	Brain_Cerebellum
ACD	16	67657512	67660810	0.0117318	-3.92032	8.84307e-05	Thyroid
LRRC36	16	67326798	67385204	0.0220389	3.91968	8.8667e-05	Lung
EIF2AK4	15	39934115	40035591	0.119401	3.91294	9.11805e-05	Brain_Anterior_cingulate_cortex_BA24
UBP1	3	33388336	33441371	0.0381525	-3.90751	9.3253e-05	Skin_Sun_Exposed_Lower_leg
TEFM	17	30897336	30906238	0.185598	-3.90127	9.56888e-05	Brain_Cerebellar_Hemisphere
FAM98A	2	33532744	33599347	0.0957147	3.89986	9.6249e-05	Testis
SLC34A2	4	25648011	25678748	0.0220445	3.89807	9.69626e-05	Thyroid
EFEMP1	2	55865967	55924139	0.0240212	-3.89545	9.80156e-05	Breast_Mammary_Tissue
PGF	14	74941834	74955626	0.0322378	-3.8941	9.85633e-05	Esophagus_Gastroesophageal_Junction
SYNDIG1	20	24469629	24666616	0.0227844	-3.89109	9.9793e-05	Brain_Caudate_basal_ganglia
SH3PXD2A	10	103594027	103855584	0.0135133	-3.8876	0.000101241	Colon_Sigmoid
C1orf43	1	154206696	154220637	0.0186055	3.87704	0.000105734	Thyroid
PPP2R3C	14	35085467	35122517	0.439225	3.87399	0.000107068	Whole_Blood
TCF20	22	42160013	42343616	0.0367833	-3.87251	0.000107722	Brain_Hypothalamus
HOMER3-AS1	19	18940235	18947452	0.224526	3.86754	0.00010994	Brain_Anterior_cingulate_cortex_BA24
LINC00235	16	525155	527407	0.0293321	-3.85739	0.000114602	Nerve_Tibial
LRRC31	3	169839172	169869935	0.0505525	3.8499	0.000118164	Liver
ATF3	1	212565334	212620777	0.0321461	-3.84308	0.000121499	Heart_Atrial_Appendage
NCOR1	17	16029065	16218185	0.0274975	-3.84002	0.000123026	Testis
ZNF213	16	3129777	3142804	0.038778	-3.83952	0.000123276	Heart_Left_Ventricle
PALB2	16	23603160	23641321	0.0426272	-3.83837	0.000123853	Spleen
CCDC13-AS1	3	42732575	42746768	0.125045	3.83568	0.000125218	Brain_Nucleus_accumbens_basal_ganglia
NDUFAF5	20	13785007	13821580	0.0437117	3.83463	0.000125753	Vagina
NDEL1	17	8413131	8490411	0.0202658	-3.83409	0.000126032	Nerve_Tibial
FUT9	6	96015974	96215612	0.0727023	3.83126	0.000127487	Pituitary
CCDC180	9	97307304	97378751	0.191991	-3.82392	0.000131344	Skin_Not_Sun_Exposed_Suprapubic
VAV3-AS1	1	107964443	107994607	0.0948657	-3.82251	0.000132098	Thyroid
METAP1D	2	171999943	172082430	0.0621442	-3.8155	0.00013591	Lung
STON1	2	48529383	48598513	0.0377465	3.80849	0.000139815	Pancreas
ABCC9	12	21797389	21942543	0.0335604	3.80808	0.000140047	Adipose_Subcutaneous
SLC27A3	1	153774354	153780157	0.040543	-3.80631	0.000141057	Colon_Sigmoid
TTC23	15	99136323	99251223	0.251474	-3.80174	0.000143682	Brain_Nucleus_accumbens_basal_ganglia
DCTN5	16	23641466	23677472	0.150794	3.80125	0.000143966	Testis
FAM167A-AS1	8	11368402	11438658	0.0957136	-3.79675	0.000146605	Brain_Spinal_cord_cervical_c-1
IRS1	2	226731312	226799820	0.0414351	3.79036	0.000150426	Small_Intestine_Terminal_Ileum
ZDHHC1	16	67394152	67416833	0.132603	3.79036	0.000150429	Thyroid
SMIM29	6	34246381	34249108	0.0116493	-3.78726	0.000152315	Thyroid
NKTR	3	42600655	42648735	0.144701	3.78651	0.000152777	Brain_Spinal_cord_cervical_c-1
AKR7A2	1	19303965	19312144	0.219026	3.78299	0.000154953	Adrenal_Gland
ZNF668	16	31060843	31074240	0.0380353	-3.78152	0.000155872	Skin_Not_Sun_Exposed_Suprapubic
NUDCD2	5	163446526	163460102	0.0245722	3.77836	0.000157865	Skin_Sun_Exposed_Lower_leg
MSH2	2	47403067	47663146	0.560377	3.77815	0.000157999	Nerve_Tibial
ZNF626	19	20619939	20661596	0.163961	3.77695	0.000158761	Artery_Coronary
CWF19L1	10	100232298	100267680	0.17158	-3.77021	0.000163109	Ovary
STARD7-AS1	2	96208389	96243353	0.0318603	-3.76517	0.000166437	Ovary
NHLRC4	16	567005	569495	0.0365146	3.75779	0.000171423	Brain_Nucleus_accumbens_basal_ganglia
TAF5	10	103367966	103389065	0.0570752	-3.75721	0.00017182	Vagina
NDUFB8	10	100523740	100530000	0.0142304	3.75684	0.000172071	Colon_Sigmoid
MMP2-AS1	16	55426797	55462297	0.200824	3.75517	0.000173221	Brain_Spinal_cord_cervical_c-1
PRDM11	11	45095806	45235110	0.0372019	3.7525	0.00017508	Pancreas
PTPN14	1	214348700	214552449	0.0285185	-3.75038	0.00017657	Ovary
P4HA2	5	132190147	132295315	0.0406635	-3.75037	0.000176573	Brain_Cortex
XIRP1	3	39183210	39192596	0.0268752	3.74881	0.000177673	Muscle_Skeletal
HLA-DPA1	6	33064569	33080775	0.0934778	3.7488	0.000177686	Colon_Sigmoid
ZNF148	3	125225669	125375325	0.0207798	3.74566	0.000179917	Artery_Coronary
CUL5	11	108008898	108107761	0.0143427	3.74054	0.000183624	Skin_Not_Sun_Exposed_Suprapubic
ST3GAL6	3	98732236	98821201	0.112781	3.74018	0.000183886	Colon_Sigmoid
YLPM1	14	74763316	74859435	0.0463508	3.73596	0.000187003	Brain_Substantia_nigra
SLC25A12	2	171783405	171999859	0.133579	3.73178	0.000190134	Brain_Nucleus_accumbens_basal_ganglia
DPP3	11	66480013	66509657	0.0848944	-3.72693	0.000193828	Uterus
EHD4	15	41895933	41972557	0.0291112	3.72535	0.000195045	Skin_Sun_Exposed_Lower_leg
INSM2	14	35534164	35537054	0.0253755	3.72442	0.000195762	Spleen
CEBPE	14	23117036	23120256	0.0148651	-3.72327	0.000196658	Muscle_Skeletal
IL25	14	23372809	23376403	0.0415586	-3.72026	0.000199019	Brain_Nucleus_accumbens_basal_ganglia
CRLF3	17	30769388	30824692	0.0335409	-3.71945	0.000199655	Skin_Not_Sun_Exposed_Suprapubic
PTCH2	1	44819844	44843253	0.0171471	-3.71562	0.000202706	Stomach
ZNF774	15	90352284	90369146	0.382141	3.71537	0.00020291	Esophagus_Muscularis
SCPEP1	17	56978129	57006768	0.218552	3.71383	0.000204144	Testis
EFL1	15	82130206	82262773	0.0666952	3.71367	0.000204277	Esophagus_Muscularis
CARD19	9	93096217	93113283	0.289191	-3.70976	0.000207456	Brain_Cerebellar_Hemisphere
TRIB1	8	125430358	125438403	0.0426678	-3.70455	0.000211766	Thyroid
IQCH-AS1	15	67290636	67521844	0.208003	3.70271	0.000213306	Kidney_Cortex
AGL	1	99850361	99924023	0.0180185	3.70148	0.000214349	Lung
PRDM1	6	105993463	106109939	0.0186878	-3.69944	0.000216078	Cells_Cultured_fibroblasts
DLG5-AS1	10	77927372	77929824	0.0214599	-3.69917	0.000216304	Pancreas
LINC00513	7	130853720	130930682	0.0391685	-3.69796	0.000217339	Artery_Aorta
TRIM16	17	15627960	15684311	0.0136706	3.69603	0.000219	Artery_Aorta
PPP1R14D	15	40815451	40828709	0.0490022	-3.69257	0.000222001	Brain_Cerebellum
SLC25A15	13	40789412	40812460	0.0228598	3.6921	0.000222414	Pituitary
CRTC3	15	90529923	90645345	0.0200028	-3.69094	0.000223425	Esophagus_Gastroesophageal_Junction
RPUSD2	15	40569299	40574949	0.0312883	-3.68727	0.00022667	Brain_Cortex
CEP120	5	123344890	123423592	0.0339785	3.68484	0.000228849	Cells_EBV-transformed_lymphocytes
LINC01123	2	109987063	109996140	0.0541035	-3.67975	0.000233459	Brain_Nucleus_accumbens_basal_ganglia
CALM3	19	46601074	46610782	0.0466743	-3.674	0.00023878	Minor_Salivary_Gland
PCBP3	21	45643694	45942454	0.102852	3.67267	0.000240034	Whole_Blood
PMF1	1	156212993	156240042	0.0117705	-3.67161	0.000241027	Adipose_Visceral_Omentum
CDC42SE2	5	131245493	131398447	0.0625502	3.67049	0.000242086	Brain_Spinal_cord_cervical_c-1
P4HA2-AS1	5	132184876	132192808	0.11852	3.66953	0.000243	Testis
NOL8	9	92297358	92325636	0.0774373	3.66557	0.000246792	Heart_Left_Ventricle
SCN2A	2	165194993	165392310	0.0627411	3.6632	0.000249085	Nerve_Tibial
LINC01090	2	187712816	188384365	0.0141126	-3.66283	0.000249449	Testis
RANBP10	16	67723070	67806560	0.125177	-3.66131	0.000250933	Pancreas
ADAMTS15	11	130448645	130476645	0.0101767	3.65668	0.000255502	Skin_Sun_Exposed_Lower_leg
MCM6	2	135839626	135876443	0.154714	-3.64815	0.000264139	Artery_Coronary
ZNF782	9	96816269	96875623	0.0371101	-3.64686	0.000265465	Vagina
MAMSTR	19	48712725	48719725	0.032271	3.64592	0.000266433	Colon_Transverse
BTRC	10	101354033	101557321	0.0852242	3.64314	0.000269333	Stomach
ZBED4	22	49853844	49890080	0.218496	3.63998	0.000272657	Brain_Cerebellum
IL27	16	28499362	28512051	0.0429641	3.63668	0.000276176	Adrenal_Gland
PEF1	1	31629866	31644896	0.0580485	-3.63188	0.000281364	Skin_Sun_Exposed_Lower_leg
GGPS1	1	235327350	235344532	0.0880293	3.62945	0.000284022	Brain_Hippocampus
ENTPD2	9	137048107	137054061	0.0886822	-3.62393	0.000290163	Colon_Transverse
LINC01843	5	134506552	134509230	0.0410698	-3.62368	0.000290439	Cells_Cultured_fibroblasts
MLLT10	10	21524646	21743630	0.0221996	-3.6235	0.000290643	Skin_Sun_Exposed_Lower_leg
CNP	17	41966763	41977740	0.0155116	-3.62299	0.000291222	Colon_Sigmoid
NPAT	11	108157215	108222638	0.0295413	3.62155	0.00029284	Brain_Cerebellar_Hemisphere
TNK1	17	7380534	7389774	0.045812	-3.62004	0.000294556	Brain_Cerebellum
CDC14B	9	96490241	96619843	0.0227692	-3.61667	0.000298416	Colon_Transverse
SLC39A1	1	153959099	153968184	0.0396139	-3.61295	0.000302731	Brain_Cerebellum
LINC01990	3	107430892	107463912	0.011086	-3.61241	0.000303367	Cells_Cultured_fibroblasts
BBX	3	107522936	107811339	0.0110236	-3.60028	0.000317874	Cells_Cultured_fibroblasts
RHBDL1	16	675671	678268	0.156011	3.59941	0.000318945	Cells_Cultured_fibroblasts
HIPK1	1	113929324	113977869	0.0575043	3.59674	0.000322229	Esophagus_Gastroesophageal_Junction
FAM171A2	17	44353215	44363853	0.0278752	3.59597	0.000323191	Thyroid
KIAA2013	1	11919591	11926428	0.0157672	3.59347	0.000326309	Cells_Cultured_fibroblasts
SLC2A9	4	9771153	10054936	0.101506	-3.5929	0.00032702	Brain_Caudate_basal_ganglia
C1QC	1	22643014	22648110	0.0231958	3.59094	0.000329483	Brain_Caudate_basal_ganglia
FAM86B1	8	12182096	12194133	0.219651	-3.59003	0.000330636	Cells_EBV-transformed_lymphocytes
S100A16	1	153606886	153613145	0.0736588	-3.58803	0.000333186	Breast_Mammary_Tissue
PIP4P1	14	20457681	20461465	0.0172609	3.5831	0.000339538	Skin_Sun_Exposed_Lower_leg
FGF1	5	142592178	142698070	0.0259228	-3.58161	0.000341479	Adipose_Subcutaneous
PFAS	17	8247618	8270491	0.0400479	-3.57875	0.000345239	Heart_Left_Ventricle
BUB1B	15	40161023	40221123	0.129658	-3.57862	0.000345417	Cells_EBV-transformed_lymphocytes
NUTM2G	9	96928310	96940253	0.0388927	3.57687	0.000347737	Adipose_Visceral_Omentum
HAT1	2	171922448	171983686	0.0422875	-3.57517	0.00035	Brain_Amygdala
SKIDA1	10	21513475	21526368	0.0270332	-3.57421	0.000351283	Adrenal_Gland
CATSPERE	1	244454377	244641177	0.0554729	3.5731	0.000352773	Stomach
DLST	14	74881891	74903743	0.0132126	-3.57024	0.000356648	Nerve_Tibial
LPCAT1	5	1456480	1523962	0.0209977	3.57018	0.00035674	Heart_Left_Ventricle
MMP2	16	55389700	55506691	0.10886	3.56585	0.000362677	Brain_Anterior_cingulate_cortex_BA24
CTCF	16	67562467	67639177	0.028066	3.56424	0.000364912	Brain_Anterior_cingulate_cortex_BA24
ADAMTS18	16	77247813	77435034	0.545853	3.56166	0.000368511	Brain_Amygdala
ZBTB47	3	42653697	42667580	0.0105765	-3.5615	0.000368749	Adipose_Subcutaneous
CREB3L4	1	153967534	153974361	0.0978718	3.55924	0.000371927	Brain_Caudate_basal_ganglia
CRELD2	22	49918167	49927540	0.131805	-3.55908	0.000372154	Artery_Aorta
FKBP14	7	30010587	30026702	0.0392004	-3.55828	0.000373293	Esophagus_Muscularis
SLC2A4	17	7281718	7288257	0.0231355	3.55762	0.000374235	Testis
CCNL1	3	157146508	157160760	0.0413469	3.55693	0.000375216	Brain_Cerebellar_Hemisphere
CHTOP	1	153633982	153646306	0.0516218	-3.55487	0.000378166	Esophagus_Muscularis
GAS2L1	22	29306618	29312787	0.44212	-3.55236	0.000381787	Brain_Cerebellum
ADAP2	17	30906344	30959322	0.0618555	3.55213	0.000382132	Brain_Cerebellar_Hemisphere
RHOT2	16	668100	674174	0.0241227	3.5491	0.000386555	Brain_Cerebellar_Hemisphere
SLC66A1	1	19312326	19329300	0.166714	3.54738	0.000389082	Whole_Blood
PPP1R3B	8	9136255	9151574	0.015593	-3.5454	0.000392013	Cells_Cultured_fibroblasts
JAML	11	118193725	118225092	0.272626	3.54514	0.000392397	Adrenal_Gland
KLHL17	1	960584	965719	0.0852554	-3.5426	0.000396203	Skin_Not_Sun_Exposed_Suprapubic
WDR86-AS1	7	151409161	151413354	0.0265561	3.54023	0.000399777	Pituitary
MZT2B	2	130181737	130190729	0.049844	3.5335	0.000410096	Adipose_Subcutaneous
VAMP2	17	8159149	8163546	0.0335148	3.53274	0.00041127	Adrenal_Gland
USP28	11	113797874	113875572	0.103392	-3.52756	0.000419403	Skin_Not_Sun_Exposed_Suprapubic
SCD	10	100347233	100364826	0.0111734	3.52154	0.00042904	Colon_Transverse
BET1L	11	167784	207399	0.130248	3.52113	0.000429714	Brain_Amygdala
SPDYE2	7	102551226	102563538	0.0844892	3.51969	0.000432058	Muscle_Skeletal
SURF2	9	133356550	133361158	0.0715645	3.51926	0.000432747	Uterus
STARD13	13	33103137	33350630	0.0314754	3.51814	0.000434581	Lung
HOMER1	5	79372636	79514134	0.0577777	3.5153	0.000439254	Small_Intestine_Terminal_Ileum
TMEM132A	11	60924460	60937159	0.0396136	3.51488	0.000439957	Brain_Putamen_basal_ganglia
METTL22	16	8621683	8649654	0.097806	-3.51326	0.000442639	Esophagus_Muscularis
HAP1	17	41717742	41734644	0.330453	-3.51323	0.000442692	Thyroid
REM1	20	31475288	31484895	0.0330093	-3.50847	0.000450692	Brain_Spinal_cord_cervical_c-1
SNRPA	19	40750637	40765389	0.0904796	3.50825	0.000451059	Cells_EBV-transformed_lymphocytes
NFKBIE	6	44258166	44265788	0.0102701	3.50459	0.000457304	Thyroid
NPR1	1	153678688	153693992	0.0839442	-3.50362	0.000458978	Esophagus_Gastroesophageal_Junction
DHX57	2	38797729	38875934	0.0317333	-3.50297	0.000460108	Brain_Cortex
GPR135	14	59429022	59465380	0.0536179	3.5029	0.000460229	Pituitary
FBXO16	8	28348287	28490278	0.230651	-3.50163	0.000462414	Thyroid
SHBG	17	7613946	7633382	0.0353578	3.49998	0.000465295	Brain_Cerebellar_Hemisphere
PICK1	22	38056311	38075701	0.218528	-3.49946	0.000466202	Brain_Hypothalamus
CTC1	17	8224815	8248058	0.0452091	3.49849	0.000467893	Skin_Sun_Exposed_Lower_leg
SLC45A4	8	141207166	141308305	0.0883359	-3.49549	0.000473198	Esophagus_Muscularis
LINC00336	6	33586104	33593338	0.020057	-3.49458	0.000474815	Testis
RNU6ATAC35P	1	220825620	220826063	0.0892383	3.49255	0.000478433	Brain_Hypothalamus
LRRC28	15	99251362	99390729	0.0388155	-3.4916	0.000480129	Prostate
HOMER3	19	18929201	18941261	0.678005	3.49158	0.000480173	Muscle_Skeletal
GALNT7	4	173168811	173323967	0.149939	-3.48867	0.000485435	Brain_Substantia_nigra
PTGDR2	11	60850933	60855950	0.106755	3.48694	0.000488584	Esophagus_Gastroesophageal_Junction
RHOV	15	40872214	40874234	0.0277112	-3.4811	0.000499365	Vagina
INPPL1	11	72223701	72239147	0.0174115	-3.47656	0.000507884	Whole_Blood
BCAT2	19	48795062	48811029	0.0272902	-3.47294	0.000514788	Adipose_Visceral_Omentum
MYH10	17	8474207	8631376	0.0349212	-3.47086	0.000518798	Brain_Hippocampus
SEZ6L	22	26169462	26383597	0.050408	3.47006	0.000520335	Vagina
CTF1	16	30896614	30903547	0.0120333	3.47001	0.000520445	Esophagus_Gastroesophageal_Junction
NRIP3	11	8965682	9005288	0.0517936	-3.46823	0.00052389	Artery_Aorta
CENPT	16	67828157	67847811	0.0217167	3.46767	0.000525	Testis
TNPO1	5	72816312	72916733	0.018946	-3.46512	0.00053	Esophagus_Gastroesophageal_Junction
GRIN1	9	137138346	137168756	0.0135772	-3.46506	0.000530113	Stomach
SDHC	1	161314381	161363206	0.0505134	-3.46237	0.000535448	Breast_Mammary_Tissue
LINC02036	3	194202392	194250203	0.0284968	-3.46209	0.000536	Thyroid
RXRB	6	33193588	33200665	0.0106009	3.46181	0.000536562	Adipose_Subcutaneous
NENF	1	212432920	212446379	0.0152993	3.46143	0.000537308	Heart_Atrial_Appendage
TM9SF4	20	32109714	32167258	0.0129634	3.45793	0.000544336	Nerve_Tibial
CCDC50	3	191329085	191398659	0.0784621	3.45595	0.000548351	Minor_Salivary_Gland
LINC02830	7	125151326	125153611	0.217006	-3.45571	0.00054885	Artery_Coronary
DDIT3	12	57516588	57521737	0.0385649	3.45559	0.000549081	Brain_Anterior_cingulate_cortex_BA24
RHEBL1	12	49064676	49070025	0.0577499	3.45384	0.000552675	Brain_Spinal_cord_cervical_c-1
KLB	4	39406930	39451533	0.0136883	-3.4534	0.000553575	Heart_Atrial_Appendage
PDCD11	10	103396626	103446294	0.110625	-3.4531	0.000554187	Pituitary
GMEB2	20	63587602	63627101	0.045068	3.45253	0.000555363	Testis
SEC31B	10	100486646	100519864	0.379978	3.45123	0.000558033	Thyroid
SPACA4	19	48606742	48607714	0.0236023	-3.45062	0.000559307	Liver
LINC02826	12	125983702	126043485	0.295795	3.44885	0.000562977	Brain_Cortex
FKBP10	17	41812680	41823213	0.0250031	3.44884	0.000563	Cells_Cultured_fibroblasts
CCNT2	2	134918235	134959342	0.139008	-3.44867	0.00056336	Esophagus_Gastroesophageal_Junction
LINC00324	17	8220624	8224043	0.0128313	3.44845	0.000563821	Colon_Transverse
STUB1	16	680224	682870	0.0141767	3.44798	0.000564796	Esophagus_Mucosa
NPRL3	16	84271	138677	0.0976219	-3.44706	0.000566732	Whole_Blood
ADGRF5	6	46852522	46954943	0.0218055	-3.44668	0.000567521	Skin_Not_Sun_Exposed_Suprapubic
WNT8B	10	100463009	100483744	0.0252886	3.44644	0.000568019	Prostate
UBE2E3	2	180967248	181076585	0.131971	3.44348	0.000574289	Cells_Cultured_fibroblasts
LRFN2	6	40391591	40587364	0.0160132	-3.44224	0.000576921	Skin_Sun_Exposed_Lower_leg
EIF2B3	1	44850522	44986722	0.0425084	3.43861	0.000584709	Adrenal_Gland
STMN3	20	63639705	63657682	0.0837349	3.43637	0.000589567	Artery_Aorta
TRIM62	1	33145399	33182059	0.0289915	-3.4361	0.000590149	Spleen
CHAD	17	50464496	50468906	0.0536864	-3.4337	0.000595394	Ovary
DBP	19	48630030	48637379	0.0669886	3.43322	0.000596462	Kidney_Cortex
TCN2	22	30607003	30627271	0.135576	3.43284	0.000597293	Brain_Cortex
PMEPA1	20	57648392	57711536	0.0500256	3.43238	0.000598308	Artery_Coronary
CUTC	10	99702558	99756134	0.0643122	-3.43115	0.000601032	Cells_EBV-transformed_lymphocytes
ACSM5	16	20409534	20441336	0.148149	-3.43069	0.000602052	Spleen
TUBA1C	12	49188736	49274600	0.254958	3.43063	0.000602171	Cells_EBV-transformed_lymphocytes
HHATL-AS1	3	42702541	42706776	0.0496518	-3.43007	0.000603423	Brain_Nucleus_accumbens_basal_ganglia
PTAR1	9	69709522	69760011	0.0205599	3.42881	0.000606225	Lung
RAD51	15	40694774	40732340	0.0705738	3.42232	0.000620892	Cells_Cultured_fibroblasts
SPTBN2	11	66682497	66744670	0.0701094	-3.41971	0.000626871	Cells_Cultured_fibroblasts
FNIP1	5	131641714	131797017	0.0145584	3.41855	0.000629554	Whole_Blood
GTF3C2	2	27325849	27356999	0.0295855	3.41733	0.000632391	Testis
CKAP4	12	106237881	106304279	0.0255847	-3.4162	0.000635027	Artery_Coronary
ZSWIM6	5	61332258	61546172	0.0357469	3.4157	0.000636181	Thyroid
YAF2	12	42157104	42238349	0.0781722	3.41536	0.000636977	Ovary
FAM85B	8	8167819	8226614	0.0708043	-3.41514	0.000637495	Adipose_Visceral_Omentum
RBM43	2	151247940	151261863	0.0312953	3.41442	0.000639188	Heart_Left_Ventricle
CEP85	1	26234200	26278808	0.119338	3.41345	0.000641465	Brain_Hippocampus
UAP1L1	9	137077517	137084539	0.123529	3.41238	0.000643978	Muscle_Skeletal
VIPR1	3	42489299	42537573	0.130177	-3.41099	0.000647286	Brain_Cortex
ARID4B	1	235131634	235328219	0.0166062	3.40873	0.000652652	Nerve_Tibial
NEBL	10	20779973	21293011	0.0798319	-3.40764	0.000655262	Brain_Spinal_cord_cervical_c-1
FGR	1	27612064	27635185	0.0168309	-3.40367	0.000664863	Esophagus_Mucosa
ZNF710-AS1	15	90074512	90082207	0.0973833	3.40356	0.000665145	Vagina
PCCA-DT	13	100053074	100088972	0.103019	-3.39896	0.000676432	Colon_Sigmoid
ZBTB46	20	63743668	63832038	0.0252296	3.39826	0.000678154	Breast_Mammary_Tissue
KCNG4	16	84218657	84240012	0.0986684	-3.39639	0.000682821	Brain_Caudate_basal_ganglia
ADAM11	17	44758988	44781846	0.0189955	3.39568	0.000684576	Stomach
PROX2	14	74852871	74876154	0.0985659	-3.39498	0.000686335	Ovary
ANTKMT	16	720581	722590	0.0204962	3.39316	0.000690901	Whole_Blood
TMEM52	1	1917590	1919279	0.0302202	-3.39174	0.000694514	Brain_Putamen_basal_ganglia
AFG1L	6	108294991	108526796	0.0799723	-3.3917	0.000694608	Brain_Substantia_nigra
TENT5C	1	117606048	117628389	0.171293	-3.39003	0.000698859	Colon_Sigmoid
LINC02769	1	208626741	208628085	0.143511	3.38904	0.000701368	Brain_Caudate_basal_ganglia
ZDHHC16	10	97446170	97457370	0.059242	-3.38646	0.000708013	Brain_Spinal_cord_cervical_c-1
ATAD5	17	30831966	30895869	0.123288	3.38559	0.000710246	Kidney_Cortex
MAPRE1	20	32819954	32850405	0.198121	-3.38413	0.000714053	Brain_Spinal_cord_cervical_c-1
SSSCA1-AS1	11	65568482	65570458	0.0352245	-3.38398	0.000714439	Brain_Putamen_basal_ganglia
PLA2G4E-AS1	15	41972763	41999094	0.0511926	3.38351	0.000715664	Esophagus_Mucosa
MILR1	17	64449037	64468643	0.0791433	3.38162	0.000720603	Cells_EBV-transformed_lymphocytes
POFUT1	20	32207855	32238658	0.029538	-3.38059	0.000723305	Minor_Salivary_Gland
HABP4	9	96450169	96491336	0.433467	3.38008	0.000724658	Testis
HCG11	6	26521709	26527404	0.104753	3.37963	0.000725837	Vagina
NDUFS2	1	161197104	161214723	0.0366408	3.37943	0.000726367	Minor_Salivary_Gland
CEND1	11	787115	790113	0.187577	3.37766	0.000731063	Cells_EBV-transformed_lymphocytes
ATM	11	108222823	108369102	0.129975	-3.37574	0.000736165	Whole_Blood
PRSS23	11	86791059	86952910	0.0592344	-3.375	0.000738153	Brain_Cerebellar_Hemisphere
PDLIM4	5	132257696	132273454	0.155266	-3.37446	0.000739614	Testis
COQ10B	2	197453493	197475310	0.0299477	-3.3742	0.000740309	Testis
SREBF2	22	41833105	41907306	0.023894	3.37419	0.000740323	Colon_Transverse
ANHX	12	133218312	133235877	0.100423	3.37396	0.000740954	Testis
CLDN7	17	7259903	7263983	0.22395	-3.36859	0.000755527	Adipose_Subcutaneous
AURKB	17	8204733	8210600	0.0712038	3.36685	0.00076032	Kidney_Cortex
PRKCI	3	170222424	170305977	0.121596	-3.36595	0.000762801	Uterus
IFT43	14	75902136	76084585	0.0173097	-3.36496	0.000765555	Lung
POLA2	11	65261913	65305959	0.0686607	3.36417	0.000767744	Cells_Cultured_fibroblasts
RPS6KA4	11	64359148	64372215	0.03614	3.36394	0.000768373	Skin_Sun_Exposed_Lower_leg
SLC51B	15	65045387	65053397	0.0275648	-3.36289	0.000771316	Brain_Frontal_Cortex_BA9
SLC1A3	5	36596588	36688334	0.176489	3.36272	0.000771798	Thyroid
DPP7	9	137110542	137118309	0.128889	3.36222	0.000773174	Brain_Hippocampus
IDH2-DT	15	90102649	90138016	0.0887113	3.35929	0.000781428	Brain_Spinal_cord_cervical_c-1
SYT13	11	45240302	45286341	0.493023	3.35907	0.000782041	Thyroid
NCAPH	2	96335766	96377091	0.0165647	3.35773	0.000785843	Artery_Tibial
TAB2	6	149218641	149411613	0.0262398	-3.35754	0.000786406	Adipose_Subcutaneous
MBD6	12	57520710	57530148	0.0514643	3.35604	0.000790681	Brain_Putamen_basal_ganglia
RND1	12	48857145	48865870	0.0105233	3.35425	0.000795811	Artery_Aorta
PSMD13	11	236966	252984	0.092855	3.35411	0.000796215	Cells_Cultured_fibroblasts
AP1B1	22	29327680	29388583	0.0918821	-3.34979	0.000808734	Skin_Sun_Exposed_Lower_leg
DUSP5	10	110497907	110511533	0.0815384	-3.34969	0.000809026	Brain_Hypothalamus
CALML4	15	68190705	68206079	0.0579567	3.34946	0.000809701	Minor_Salivary_Gland
FGF8	10	101770109	101780371	0.0142317	-3.3493	0.000810166	Breast_Mammary_Tissue
EMC2	8	108443601	108489196	0.0125409	3.34853	0.000812407	Adipose_Visceral_Omentum
LINC02798	1	121396754	121463508	0.0506978	-3.34849	0.000812528	Pituitary
CACNA1C-AS1	12	2676001	2691200	0.0282141	3.34699	0.000816927	Whole_Blood
NTN5	19	48661407	48673081	0.0767921	3.34621	0.000819244	Brain_Amygdala
SFRP1	8	41261962	41309473	0.0197682	3.3451	0.000822531	Colon_Sigmoid
PPFIA1	11	70270690	70385312	0.0319164	3.344	0.00082581	Testis
NAA60	16	3443649	3486953	0.311056	-3.34353	0.000827188	Cells_Cultured_fibroblasts
TSKU	11	76782251	76798153	0.118745	3.34298	0.000828836	Brain_Caudate_basal_ganglia
PTK6	20	63528001	63537376	0.0865485	3.34274	0.000829552	Brain_Cerebellum
SH3BP1	22	37634654	37656117	0.042973	3.34241	0.000830536	Heart_Atrial_Appendage
LINC01725	1	83575776	83861053	0.11403	-3.34109	0.00083451	Thyroid
B3GAT1	11	134378504	134412242	0.0995214	-3.3399	0.000838071	Whole_Blood
PPP1R2	3	195514428	195543386	0.0440513	3.33892	0.000841035	Colon_Transverse
TRIM24	7	138460259	138589996	0.0369381	-3.3383	0.000842936	Whole_Blood
RBBP5	1	205086142	205122015	0.0718708	-3.33788	0.000844193	Brain_Caudate_basal_ganglia
CD164	6	109366514	109382467	0.301837	3.33738	0.000845736	Muscle_Skeletal
SPTSSA	14	34432788	34462240	0.0444818	3.33714	0.000846464	Adrenal_Gland
TOMM20	1	235109341	235128837	0.0112917	3.33701	0.00084686	Thyroid
EPB41L4A-DT	5	112419583	112420978	0.0351019	3.33466	0.000854034	Spleen
ARHGEF26-AS1	3	154024401	154121347	0.25824	-3.33418	0.000855527	Brain_Putamen_basal_ganglia
STX4	16	31032889	31042975	0.0119512	-3.33328	0.000858275	Whole_Blood
ADK	10	74151202	74709963	0.0792726	3.33176	0.000862988	Testis
ZFP91	11	58579063	58621550	0.0103392	3.33003	0.000868366	Thyroid
ERH	14	69380128	69398299	0.0204995	3.32996	0.000868594	Testis
POLR3K	16	46407	53608	0.171097	-3.32787	0.000875141	Skin_Sun_Exposed_Lower_leg
PGAP1	2	196833004	196927796	0.0173665	3.32701	0.000877843	Colon_Transverse
ITPR3	6	33620365	33696574	0.293321	-3.32656	0.00087924	Skin_Sun_Exposed_Lower_leg
CEP250	20	35455164	35519280	0.0275331	3.32345	0.000889115	Pancreas
ITPRIP	10	104309698	104338465	0.0136035	-3.32336	0.000889414	Lung
FAM86B2	8	12424411	12436406	0.161118	3.32261	0.000891788	Brain_Caudate_basal_ganglia
MARCH10	2	184598529	184939492	0.0175067	3.32046	0.000898678	Thyroid
MARCH6	19	58059239	58086310	0.0369866	3.31926	0.000902571	Cells_EBV-transformed_lymphocytes
MARCH5	11	66337333	66345125	0.0400165	-3.31898	0.000903453	Adipose_Subcutaneous
MARCH1	11	70398404	70436584	0.0213378	3.31865	0.000904553	Colon_Sigmoid
MARCH7	11	125094389	125111763	0.0626666	-3.31773	0.000907522	Whole_Blood
MARCH8	15	59659146	59689339	0.0327584	3.31655	0.000911369	Esophagus_Mucosa
MARCH9	7	143407784	143523449	0.0482206	-3.31636	0.000911987	Brain_Spinal_cord_cervical_c-1
MARCH4	12	106063345	106138954	0.0536673	-3.31544	0.000914984	Thyroid
INO80D	2	205993721	206086303	0.0151584	-3.31513	0.000916012	Uterus
TAS2R5	7	141790217	141791367	0.0524719	3.31465	0.000917588	Artery_Coronary
TMEM150B	19	55312801	55334048	0.0215476	3.31452	0.000918	Brain_Hippocampus
RILPL1	12	123470054	123533719	0.035962	3.31445	0.00091823	Ovary
HAGHL	16	726936	735525	0.0440137	-3.31257	0.000924415	Brain_Cerebellum
ACVRL1	12	51906908	51923361	0.146808	3.31183	0.000926888	Esophagus_Muscularis
VEZF1	17	57971547	57988259	0.032205	3.31132	0.000928584	Cells_Cultured_fibroblasts
INTS3	1	153728050	153774808	0.0618338	-3.31053	0.000931185	Brain_Cerebellum
POLH	6	43576185	43620523	0.0197858	3.31046	0.000931427	Brain_Spinal_cord_cervical_c-1
PNPO	17	47941506	47949308	0.0366497	-3.30941	0.000934944	Adipose_Visceral_Omentum
MTFMT	15	65001512	65029639	0.107187	3.30517	0.000949184	Heart_Left_Ventricle
UROS	10	125784980	125823288	0.0126481	-3.30378	0.000953898	Vagina
THSD7A	7	11370365	11832198	0.0588832	3.30377	0.000953956	Brain_Cortex
OMG	17	31272013	31297539	0.0743753	-3.30246	0.000958403	Brain_Frontal_Cortex_BA9
EPCAM	2	47345158	47387601	0.0245501	3.30167	0.000961124	Pancreas
METTL2A	17	62423875	62453385	0.115531	-3.3005	0.000965135	Artery_Coronary
SLC12A4	16	67943474	67969601	0.024303	3.29971	0.000967859	Esophagus_Gastroesophageal_Junction
MIA	19	40771648	40777490	0.0139099	-3.29847	0.000972137	Brain_Nucleus_accumbens_basal_ganglia
BRINP3	1	190097658	190478404	0.0266083	3.29825	0.000972881	Artery_Aorta
METTL15	11	28108248	28527041	0.0319435	-3.29785	0.000974279	Spleen
LINC00114	21	38733890	38747460	0.150129	-3.29748	0.000975551	Artery_Aorta
HHATL	3	42692663	42702824	0.233952	-3.29713	0.000976799	Heart_Atrial_Appendage
NRG1-IT1	8	32026210	32139495	0.17472	-3.2967	0.000978264	Testis
REEP3	10	63521401	63625128	0.387509	3.29647	0.00097909	Lung
ADRB2	5	148826611	148828623	0.0252209	-3.29603	0.000980611	Esophagus_Muscularis
MPZL3	11	118226690	118252365	0.0205972	3.29589	0.00098111	Prostate
BEST4	1	44783585	44788170	0.0785345	3.29584	0.000981265	Ovary
ACMSD	2	134838616	134902034	0.0391294	3.29429	0.000986702	Brain_Cerebellar_Hemisphere
KIF5B	10	32009015	32056425	0.0249019	-3.29399	0.000987746	Heart_Left_Ventricle
P2RY12	3	151336843	151384753	0.103279	-3.28934	0.00100424	Testis
ZC2HC1C	14	75064109	75119502	0.0677055	-3.28815	0.00100848	Pancreas
MFN2	1	11980181	12015211	0.0723055	3.28581	0.00101689	Heart_Atrial_Appendage
POU2F3	11	120236640	120319945	0.117069	-3.28531	0.00101869	Brain_Cortex
ACSF2	17	50426158	50474845	0.125589	-3.28513	0.00101937	Heart_Atrial_Appendage
MFHAS1	8	8783354	8893630	0.210828	3.2836	0.00102491	Muscle_Skeletal
CHEK2	22	28687743	28742422	0.123336	-3.2803	0.00103698	Thyroid
PRODH	22	18912777	18936553	0.0180436	-3.27984	0.00103867	Stomach
ACAP2-IT1	3	195280723	195282741	0.151204	3.27958	0.00103961	Colon_Sigmoid
SERPINB5	18	63476958	63505085	0.0340585	3.27757	0.00104703	Minor_Salivary_Gland
SRMS	20	63538489	63547749	0.0377973	3.27666	0.00105044	Brain_Cerebellum
ARL4C	2	234493041	234497081	0.0266574	-3.27646	0.00105117	Esophagus_Mucosa
CACNA1I	22	39570753	39689735	0.0212697	3.27597	0.001053	Testis
BMP4	14	53949736	53958761	0.105509	3.27506	0.00105638	Brain_Anterior_cingulate_cortex_BA24
N4BP2L2	13	32432417	32538885	0.066048	3.27471	0.0010577	Adrenal_Gland
PTGFR	1	78303884	78540701	0.0413156	3.27398	0.00106044	Pancreas
UBE2I	16	1291444	1327018	0.024685	3.27387	0.00106084	Brain_Amygdala
FAM66A	8	12362019	12388296	0.0723557	3.27372	0.00106142	Brain_Putamen_basal_ganglia
THAP11	16	67842320	67844195	0.405615	-3.2733	0.001063	Heart_Left_Ventricle
DCTN6	8	30156319	30183639	0.0105484	3.27227	0.00106689	Skin_Not_Sun_Exposed_Suprapubic
ZSCAN10	16	3088890	3099295	0.0111434	3.2711	0.0010713	Pituitary
WASIR2	16	22910	25123	0.0794522	3.27106	0.00107147	Uterus
PDXP	22	37658723	37666932	0.187868	-3.27053	0.00107346	Lung
ADGRA2	8	37784191	37844896	0.0323326	-3.2692	0.00107853	Pancreas
EMP1	12	13196723	13219941	0.0534933	-3.26899	0.00107933	Liver
BCL7C	16	30833626	30894302	0.0768102	3.26896	0.00107944	Colon_Sigmoid
EGLN2	19	40798996	40808434	0.0291468	-3.2686	0.00108083	Brain_Cerebellum
TMEM184B	22	38219291	38273010	0.0266703	-3.26697	0.00108706	Whole_Blood
LRP4	11	46856717	46918642	0.0842016	-3.26521	0.00109383	Stomach
INCENP	11	62123998	62153169	0.015641	-3.26487	0.00109515	Pituitary
POLR2F	22	37952607	38041915	0.134522	-3.26401	0.00109848	Muscle_Skeletal
BCL2L2	14	23298790	23311751	0.036785	3.26088	0.00111066	Adipose_Subcutaneous
TNS1	2	217799588	218033982	0.0370099	-3.26084	0.00111081	Artery_Aorta
SLC22A4	5	132294394	132344190	0.0182937	3.26063	0.00111163	Colon_Transverse
CGRRF1	14	54509812	54539292	0.0387039	-3.26062	0.00111168	Brain_Substantia_nigra
IRF1	5	132440440	132508719	0.0514931	-3.26043	0.00111242	Brain_Spinal_cord_cervical_c-1
POLRMT	19	617221	633537	0.0375427	-3.25951	0.00111605	Artery_Tibial
NF1	17	31094927	31382116	0.0710671	3.25785	0.0011226	Whole_Blood
ARHGAP9	12	57472264	57488814	0.0195038	-3.25784	0.00112265	Brain_Anterior_cingulate_cortex_BA24
RSF1	11	77660009	77820869	0.0480091	3.25777	0.00112292	Colon_Sigmoid
ALDH1L1	3	126103562	126197994	0.0309209	3.25746	0.00112412	Esophagus_Mucosa
ANK1	8	41653220	41896741	0.0187685	3.2573	0.00112479	Prostate
POLR2A	17	7484366	7514616	0.0317005	3.25689	0.0011264	Whole_Blood
KLHDC9	1	161098361	161100346	0.0187401	-3.25616	0.00112929	Esophagus_Mucosa
IL10RA	11	117986370	118003037	0.125283	-3.25582	0.00113065	Artery_Tibial
UTS2B	3	191267168	191330526	0.153876	3.25514	0.00113335	Skin_Not_Sun_Exposed_Suprapubic
CDX2	13	27960918	27969315	0.0268235	3.25359	0.00113956	Pancreas
LINC01606	8	57142659	57244793	0.0256562	-3.25302	0.00114185	Pituitary
MMP25	16	3046062	3060726	0.18257	3.25289	0.00114238	Heart_Atrial_Appendage
LST1	6	31586124	31588909	0.067414	3.25199	0.00114602	Adipose_Visceral_Omentum
DCAF12	9	34086387	34127399	0.0451382	-3.2512	0.00114918	Skin_Sun_Exposed_Lower_leg
NOL4L	20	32443059	32585333	0.0100017	-3.25062	0.00115152	Brain_Substantia_nigra
KLF4	9	107484852	107490482	0.0460112	-3.25	0.00115403	Adipose_Subcutaneous
DPF3	14	72609034	72894101	0.010967	-3.2495	0.00115606	Skin_Sun_Exposed_Lower_leg
PRORP	14	35121846	35277622	0.0920956	-3.24921	0.00115727	Spleen
RRAGA	9	19049427	19051025	0.305959	-3.2486	0.00115974	Skin_Not_Sun_Exposed_Suprapubic
MARS	12	57475445	57517569	0.0113019	3.24816	0.00116153	Testis
JKAMP	14	59484443	59505410	0.14445	-3.24701	0.00116623	Muscle_Skeletal
BLOC1S2	10	100273280	100286680	0.204849	-3.24689	0.00116672	Whole_Blood
PIM3	22	49960768	49964072	0.0852507	-3.24638	0.00116881	Adrenal_Gland
CCNG1	5	163437569	163446151	0.0391957	-3.24564	0.00117188	Brain_Cerebellar_Hemisphere
CLUL1	18	596988	650334	0.0907609	-3.24513	0.00117398	Brain_Substantia_nigra
GPR176	15	39799008	39920936	0.397422	-3.24512	0.001174	Adrenal_Gland
IGF1R	15	98648539	98964530	0.122435	-3.24468	0.00117582	Pancreas
COL6A1	21	45981770	46005050	0.034912	3.24351	0.00118065	Lung
SYNE1	6	152121687	152637801	0.071907	3.24325	0.00118174	Cells_Cultured_fibroblasts
CNKSR3	6	154387515	154510685	0.085022	3.24242	0.00118517	Cells_Cultured_fibroblasts
AFMID	17	78187358	78207702	0.0301632	-3.23981	0.00119611	Brain_Cortex
NELFCD	20	58981208	58995133	0.0202268	3.23932	0.00119814	Brain_Nucleus_accumbens_basal_ganglia
COMT	22	19941371	19969975	0.238199	3.23902	0.00119941	Adrenal_Gland
LINC02687	11	45371397	45388511	0.0501666	3.23772	0.0012049	Brain_Nucleus_accumbens_basal_ganglia
AGRP	16	67482571	67483547	0.0740953	3.23665	0.00120943	Minor_Salivary_Gland
SMC6	2	17663812	17800242	0.0356339	-3.23595	0.00121239	Thyroid
PEG13	8	140092781	140100553	0.263072	-3.23485	0.00121706	Esophagus_Mucosa
LYPLAL1-AS1	1	219409039	219459369	0.0966622	-3.23427	0.00121955	Colon_Transverse
KCNIP2	10	101825974	101843920	0.0331951	-3.23401	0.00122065	Breast_Mammary_Tissue
GDF5	20	35433347	35454746	0.0104943	3.23338	0.00122336	Heart_Atrial_Appendage
MRPL36	5	1798385	1801366	0.0153568	-3.23287	0.00122551	Liver
GNAI3	1	109548615	109600195	0.171416	3.23223	0.00122829	Brain_Cerebellar_Hemisphere
TNFAIP2	14	103121476	103137439	0.030512	3.23187	0.00122981	Brain_Putamen_basal_ganglia
DUOXA1	15	45117366	45129938	0.100197	-3.23072	0.00123477	Skin_Sun_Exposed_Lower_leg
SLC1A4	2	64988477	65023865	0.103239	3.22926	0.0012411	Adipose_Visceral_Omentum
GSTA2	6	52750087	52763475	0.0308361	-3.22921	0.00124132	Pancreas
SLC7A4	22	21028718	21032840	0.0479402	-3.22684	0.00125166	Esophagus_Mucosa
SLC25A35	17	8287763	8295400	0.145243	3.22676	0.00125201	Whole_Blood
USP17L7	8	12132417	12134099	0.033159	-3.2263	0.001254	Brain_Cerebellar_Hemisphere
ELP5	17	7251416	7259940	0.0230928	-3.22525	0.00125862	Muscle_Skeletal
MDH1B	2	206737763	206765328	0.456721	-3.22478	0.0012607	Small_Intestine_Terminal_Ileum
KIF2C	1	44739818	44767767	0.0513953	-3.22298	0.00126865	Brain_Cerebellum
LRRC6	8	132570416	132675592	0.0508668	-3.22113	0.00127684	Cells_Cultured_fibroblasts
MRPS27	5	72214953	72321717	0.0115561	-3.22091	0.00127785	Uterus
TOMM40L	1	161225939	161230746	0.0437853	3.22072	0.00127867	Cells_Cultured_fibroblasts
SMPD3	16	68358327	68448508	0.0225176	3.22063	0.00127909	Brain_Hippocampus
ABHD8	19	17292131	17310236	0.0596955	-3.21972	0.00128315	Skin_Sun_Exposed_Lower_leg
POLR2L	11	837356	842529	0.225798	3.21963	0.00128355	Heart_Atrial_Appendage
ATXN10	22	45671798	45845307	0.0593719	3.21912	0.00128585	Whole_Blood
ARVCF	22	19969896	20016823	0.137019	3.21908	0.00128601	Brain_Spinal_cord_cervical_c-1
TMEM81	1	205083129	205084460	0.112291	-3.21899	0.00128641	Brain_Cerebellum
CTDNEP1	17	7243591	7252491	0.200524	3.21614	0.00129928	Ovary
BRF2	8	37843268	37849861	0.0635803	3.21549	0.00130221	Liver
NDRG4	16	58462846	58513628	0.0328257	-3.21474	0.0013056	Skin_Sun_Exposed_Lower_leg
RAD51AP2	2	17510579	17518440	0.131559	3.21426	0.0013078	Pancreas
LCA5	6	79484991	79537458	0.0737146	-3.21407	0.00130868	Adipose_Visceral_Omentum
TMEM100	17	55719627	55732121	0.027845	3.21376	0.00131008	Testis
CCDC183	9	136796338	136807741	0.0119588	3.21346	0.00131144	Muscle_Skeletal
ADM	11	10305073	10307397	0.01705	-3.21325	0.00131242	Cells_EBV-transformed_lymphocytes
HIF1AN	10	100529072	100559998	0.0418733	3.20876	0.00133311	Whole_Blood
ST5	11	8693351	8910951	0.286967	-3.20847	0.00133442	Spleen
PLK1	16	23677656	23690367	0.0404998	-3.20842	0.00133467	Brain_Hippocampus
FAF1	1	50437028	50960267	0.10291	3.20637	0.00134422	Brain_Cortex
TUBG1	17	42609641	42615238	0.0480632	3.20617	0.00134516	Small_Intestine_Terminal_Ileum
LRRN2	1	204617170	204685738	0.0449241	3.20481	0.00135154	Liver
CS	12	56271699	56300391	0.0241328	-3.20248	0.00136248	Esophagus_Mucosa
ERLIN1	10	100150094	100186033	0.0228518	3.20228	0.00136346	Cells_EBV-transformed_lymphocytes
ATP6V0D1	16	67438014	67481181	0.117209	-3.20132	0.00136798	Spleen
DSCAML1	11	117427772	117817525	0.157599	3.19893	0.00137937	Adrenal_Gland
ZNRD2	11	65570460	65573942	0.0480645	3.19797	0.00138399	Pituitary
KMT2E	7	104940943	105115019	0.0404171	3.19728	0.00138729	Cells_EBV-transformed_lymphocytes
TMEM241	18	23197144	23437961	0.0372374	-3.19695	0.00138888	Whole_Blood
RAB3C	5	58582221	58859394	0.0414625	-3.19663	0.00139045	Artery_Tibial
CAPN15	16	527712	554636	0.0634336	-3.19618	0.00139258	Brain_Substantia_nigra
RHBDF2	17	76470891	76501790	0.0757457	-3.19507	0.00139798	Brain_Spinal_cord_cervical_c-1
RASSF8	12	25958232	26079892	0.0548397	3.19474	0.00139957	Skin_Not_Sun_Exposed_Suprapubic
LINC-PINT	7	130791264	131110176	0.0116555	-3.19464	0.00140003	Cells_EBV-transformed_lymphocytes
SNX6	14	34561093	34630160	0.0701568	-3.19443	0.00140105	Heart_Atrial_Appendage
FGFBP3	10	91906584	91909486	0.0200241	-3.19389	0.00140372	Esophagus_Mucosa
PRICKLE1	12	42456757	42590355	0.0484205	-3.19359	0.00140515	Esophagus_Muscularis
PTP4A2	1	31906421	31944856	0.0320831	3.19082	0.00141869	Cells_EBV-transformed_lymphocytes
DUS4L	7	107563484	107578523	0.040689	-3.19066	0.00141946	Lung
DOCK9	13	98793429	99086625	0.0116561	3.18711	0.001437	Brain_Hippocampus
TBATA	10	70771238	70785401	0.0255624	3.1863	0.00144106	Skin_Sun_Exposed_Lower_leg
MYCBPAP	17	50508425	50531501	0.0308586	-3.18593	0.0014429	Artery_Tibial
RRBP1	20	17613678	17682295	0.25275	-3.18507	0.00144721	Pancreas
EFS	14	23356403	23365752	0.138754	-3.18499	0.00144758	Brain_Cerebellum
CLCA4	1	86547078	86580754	0.0358141	-3.18159	0.00146467	Brain_Nucleus_accumbens_basal_ganglia
TDRG1	6	40334775	40387590	0.0437064	3.18059	0.00146977	Brain_Amygdala
DMXL1	5	119037772	119249138	0.0686682	-3.17951	0.00147526	Adrenal_Gland
THBS1	15	39581079	39599466	0.0345037	-3.17903	0.00147766	Uterus
UVRAG	11	75815210	76144232	0.048272	3.17807	0.00148257	Cells_Cultured_fibroblasts
NIN	14	50719763	50831162	0.0464358	-3.17639	0.00149118	Brain_Frontal_Cortex_BA9
BORA	13	72727749	72756198	0.0296135	3.17548	0.00149587	Adipose_Visceral_Omentum
FUT2	19	48695971	48705951	0.0736615	-3.17534	0.00149662	Cells_Cultured_fibroblasts
SEMA4D	9	89360787	89498130	0.0652618	-3.17523	0.00149717	Esophagus_Gastroesophageal_Junction
TPM3	1	154155308	154194648	0.0715173	3.17386	0.00150426	Adrenal_Gland
TRABD2B	1	47760528	47997385	0.0412968	-3.17341	0.0015066	Thyroid
TRIR	19	12730640	12734684	0.0738212	-3.17232	0.00151225	Brain_Putamen_basal_ganglia
NBL1	1	19596979	19658456	0.0244724	-3.17177	0.00151514	Cells_Cultured_fibroblasts
SLC26A10	12	57619527	57626036	0.0834112	3.17036	0.00152249	Colon_Sigmoid
ITGAL	16	30472658	30523567	0.050922	3.16926	0.00152828	Lung
ADPRH	3	119579268	119589945	0.0219281	3.16845	0.00153253	Artery_Aorta
HAUS2	15	42548828	42569994	0.332783	3.16767	0.00153667	Colon_Sigmoid
KLC4	6	43040777	43075095	0.0142773	-3.16704	0.00153998	Pituitary
DMGDH	5	78997564	79236038	0.0567195	-3.16579	0.00154664	Skin_Not_Sun_Exposed_Suprapubic
FAM89B	11	65572349	65574198	0.101192	-3.16552	0.00154807	Pancreas
SEPTIN8	5	132750819	132807241	0.0172148	3.16546	0.00154836	Colon_Sigmoid
LYSMD1	1	151159748	151165948	0.0124355	-3.16417	0.00155526	Testis
HELZ2	20	63558086	63574239	0.0580138	-3.16415	0.00155534	Artery_Aorta
CDH24	14	23047062	23057538	0.0223213	-3.16244	0.00156451	Adipose_Visceral_Omentum
UQCR10	22	29767369	29770413	0.0338061	3.16161	0.00156899	Whole_Blood
DHCR7	11	71428193	71452868	0.0338178	-3.16134	0.00157045	Nerve_Tibial
BCL2L11	2	111119378	111168444	0.0210534	3.16123	0.00157103	Prostate
NHSL1	6	138422043	138692571	0.0542852	3.15717	0.00159306	Brain_Caudate_basal_ganglia
ZNF268	12	133181409	133214832	0.0643978	-3.15709	0.00159354	Brain_Cerebellum
PKIB	6	122471917	122726373	0.227846	-3.15559	0.00160173	Heart_Left_Ventricle
CDK5RAP3	17	47967810	47981781	0.0491928	3.15369	0.00161219	Whole_Blood
IL17RD	3	57089982	57170306	0.159692	-3.15352	0.00161312	Ovary
SH3BGRL3	1	26280086	26281522	0.206347	3.15213	0.00162087	Brain_Cerebellum
TDP2	6	24649979	24666930	0.0600803	3.15202	0.00162145	Heart_Atrial_Appendage
TLX1	10	101131300	101137789	0.210999	-3.15158	0.00162389	Adipose_Visceral_Omentum
ECM1	1	150508062	150513789	0.0481972	3.14937	0.00163624	Esophagus_Muscularis
TAF3	10	7818497	8016631	0.0145329	-3.14803	0.00164375	Spleen
DYNC1I2	2	171687409	171750158	0.0188688	-3.14773	0.00164543	Skin_Not_Sun_Exposed_Suprapubic
CD164L2	1	27379176	27383333	0.107543	-3.14762	0.00164607	Brain_Cerebellar_Hemisphere
DENND3	8	141117278	141195808	0.330196	-3.14761	0.00164608	Brain_Hypothalamus
FGA	4	154583126	154590742	0.0382534	3.14729	0.00164791	Colon_Sigmoid
METRN	16	715118	719655	0.0288135	-3.14719	0.00164845	Breast_Mammary_Tissue
UNC5D	8	35235475	35796550	0.0328246	3.14717	0.00164859	Brain_Cortex
MED7	5	157137424	157159019	0.0611713	-3.14694	0.00164988	Testis
RASL10A	22	29312933	29319679	0.24057	-3.1465	0.00165239	Brain_Cerebellum
RAB11FIP1	8	37858618	37899497	0.227237	-3.14586	0.001656	Small_Intestine_Terminal_Ileum
SPEF1	20	3777504	3781448	0.0436404	-3.14483	0.00166184	Brain_Nucleus_accumbens_basal_ganglia
C15orf62	15	40769980	40772449	0.134348	-3.14305	0.001672	Artery_Tibial
PHYHIP	8	22219703	22232101	0.0110136	3.14297	0.00167244	Muscle_Skeletal
ZNF431	19	21142024	21196053	0.0221848	3.14187	0.00167872	Brain_Caudate_basal_ganglia
SIPA1L3	19	37907208	38208369	0.0944857	-3.14148	0.00168097	Prostate
WDR90	16	649311	667833	0.110016	-3.14123	0.0016824	Testis
ITK	5	157142933	157255185	0.0677644	3.14095	0.00168401	Prostate
E2F4	16	67192155	67198918	0.0235028	3.13866	0.0016972	Adipose_Subcutaneous
TMX4	20	7977346	8019805	0.012594	-3.13802	0.00170094	Adipose_Subcutaneous
IP6K2	3	48688003	48740353	0.0371998	3.13744	0.00170428	Pituitary
SNAPIN	1	153658703	153661852	0.182473	3.13572	0.00171431	Brain_Putamen_basal_ganglia
SYNPR	3	63228315	63616924	0.022699	3.13407	0.001724	Brain_Nucleus_accumbens_basal_ganglia
PTGER2	14	52314305	52328598	0.0422525	-3.13367	0.00172638	Heart_Left_Ventricle
RRP15	1	218285293	218337983	0.0140448	3.1311	0.00174155	Brain_Cerebellum
KCTD8	4	44173903	44448809	0.0328131	-3.12895	0.00175434	Adipose_Visceral_Omentum
VSIG10	12	118063593	118136026	0.0206373	3.12833	0.001758	Spleen
LINC02412	12	93173470	93182299	0.119691	-3.12667	0.001768	Prostate
CDX1	5	150166778	150184558	0.048044	3.12633	0.00177	Brain_Anterior_cingulate_cortex_BA24
SPRED2	2	65310851	65432637	0.0376682	-3.12592	0.00177248	Testis
MUC15	11	26559032	26572263	0.014982	3.12414	0.00178325	Skin_Not_Sun_Exposed_Suprapubic
CNTN2	1	205042937	205078289	0.0738791	3.12401	0.00178405	Brain_Hippocampus
ALDH9A1	1	165662216	165698562	0.0286296	-3.12358	0.00178663	Esophagus_Mucosa
ITPK1	14	92936914	93116320	0.301587	-3.12351	0.0017871	Thyroid
SH3RF3	2	109129205	109504634	0.45153	-3.12294	0.00179054	Esophagus_Muscularis
DVL2	17	7225342	7234517	0.0266518	-3.12286	0.001791	Skin_Sun_Exposed_Lower_leg
POLR2G	11	62761565	62766710	0.0602477	-3.12278	0.00179153	Brain_Spinal_cord_cervical_c-1
GSTA5	6	52831655	52840843	0.0516238	3.12151	0.00179926	Testis
OLFML3	1	113979391	114035572	0.0185578	-3.11992	0.00180902	Breast_Mammary_Tissue
MDM4	1	204516379	204558120	0.054154	3.1199	0.00180913	Adrenal_Gland
WSB2	12	118032687	118062430	0.0211823	3.11982	0.00180959	Whole_Blood
TNFSF4	1	173183731	173207331	0.254671	3.11926	0.00181306	Heart_Left_Ventricle
TMEM108	3	133038391	133397775	0.0346663	-3.11872	0.00181636	Adipose_Visceral_Omentum
CSNK1G3	5	123512177	123617049	0.021181	3.11833	0.00181882	Small_Intestine_Terminal_Ileum
HDGFL3	15	83112738	83207823	0.0322082	-3.11832	0.00181885	Nerve_Tibial
ADGRA1	10	133087924	133131675	0.0519524	3.11727	0.00182536	Esophagus_Muscularis
APOD	3	195568705	195584033	0.0633974	-3.11722	0.00182568	Brain_Cerebellar_Hemisphere
HOMER2	15	82836946	82986153	0.119389	-3.11721	0.00182569	Muscle_Skeletal
GTF2A2	15	59638062	59657541	0.0266472	3.117	0.001827	Pituitary
PHF1	6	33410399	33416453	0.0319226	3.1152	0.00183821	Artery_Aorta
APOA2	1	161222292	161223631	0.0205596	3.11459	0.00184202	Whole_Blood
TTC25	17	41930617	41966503	0.0116438	-3.11266	0.00185409	Esophagus_Gastroesophageal_Junction
QKI	6	163414000	163578592	0.0147682	3.11231	0.00185627	Nerve_Tibial
LINC01001	11	127204	139612	0.0855132	3.11168	0.00186023	Prostate
EEF1B2	2	206159585	206162928	0.0297901	3.11162	0.00186061	Heart_Left_Ventricle
SCN1B	19	35030470	35040449	0.0416134	-3.11004	0.00187059	Artery_Tibial
STK16	2	219245455	219250337	0.0727813	-3.10958	0.00187354	Pancreas
ZBTB14	18	5289019	5297053	0.0151236	-3.10951	0.001874	Brain_Anterior_cingulate_cortex_BA24
EEF1G	11	62559596	62574086	0.0294605	3.10945	0.00187437	Brain_Cerebellum
SELENOS	15	101270817	101277500	0.0300533	3.1086	0.00187979	Esophagus_Muscularis
DCTN2	12	57529633	57547224	0.0100265	3.10796	0.00188385	Muscle_Skeletal
COL11A2	6	33162681	33192499	0.140337	3.10748	0.00188688	Brain_Spinal_cord_cervical_c-1
MT1M	16	56632659	56633981	0.219966	-3.10648	0.00189328	Kidney_Cortex
CD109	6	73695785	73828316	0.116193	-3.10638	0.00189393	Colon_Sigmoid
TRMT112	11	64316460	64317559	0.0967671	3.10552	0.00189942	Artery_Aorta
ATP10B	5	160563120	160852214	0.0315198	-3.10519	0.00190159	Testis
TSC22D2	3	150408298	150466422	0.0525362	-3.10378	0.00191062	Brain_Spinal_cord_cervical_c-1
SRP14-AS1	15	40039242	40080614	0.0387161	3.10077	0.00193017	Heart_Left_Ventricle
SMYD1	2	88067825	88113384	0.415567	3.10034	0.00193301	Artery_Tibial
USP15	12	62260338	62417431	0.0159663	3.09909	0.00194119	Nerve_Tibial
TBL1XR1	3	177019340	177228000	0.0847611	-3.09902	0.00194161	Heart_Atrial_Appendage
UGT3A2	5	36035021	36071358	0.0262568	3.09887	0.00194258	Liver
RNF135	17	30970984	30999911	0.0474801	3.09866	0.001944	Brain_Frontal_Cortex_BA9
SAMD7	3	169911572	169939175	0.0270115	-3.09806	0.00194795	Cells_EBV-transformed_lymphocytes
NPIPB4	16	21834582	21880827	0.0498942	3.09737	0.00195248	Small_Intestine_Terminal_Ileum
GMIP	19	19629476	19643657	0.0719259	-3.0961	0.00196085	Muscle_Skeletal
CCDC175	14	59504539	59576812	0.0236182	3.09605	0.00196115	Small_Intestine_Terminal_Ileum
RAVER2	1	64745075	64833232	0.0527912	3.09548	0.00196493	Adrenal_Gland
DENND1A	9	123379654	123930152	0.0316052	3.09504	0.00196784	Colon_Transverse
RASGRP3	2	33436324	33564750	0.0106037	-3.09502	0.00196797	Cells_EBV-transformed_lymphocytes
ST14	11	130159782	130210362	0.191824	-3.09502	0.001968	Brain_Cortex
MOBP	3	39467198	39529479	0.060685	3.09294	0.00198184	Muscle_Skeletal
MRGPRX2	11	19054455	19060717	0.0303528	-3.09244	0.00198521	Adipose_Visceral_Omentum
THBD	20	23045633	23049672	0.0546256	-3.09214	0.0019872	Whole_Blood
C19orf54	19	40740856	40751553	0.0841394	-3.09144	0.00199189	Thyroid
MAP3K1	5	56815549	56896152	0.320532	3.09085	0.00199586	Uterus
MYH13	17	10300865	10373130	0.133759	-3.09065	0.00199717	Small_Intestine_Terminal_Ileum
ATG10	5	81972023	82276857	0.0919316	-3.09059	0.00199758	Cells_EBV-transformed_lymphocytes
CCDC15	11	124954121	125041489	0.631026	-3.09047	0.00199841	Cells_EBV-transformed_lymphocytes
MCRIP2	16	636817	648474	0.106105	-3.09042	0.00199876	Pituitary
THUMPD1	16	20702816	20742084	0.0461003	-3.08919	0.002007	Thyroid
ANKRD63	15	40278372	40283064	0.0131353	3.08844	0.00201208	Testis
LRP12	8	104489231	104589258	0.0498779	3.0882	0.00201374	Stomach
RAB11FIP4	17	31391675	31538211	0.0909148	-3.08788	0.0020159	Colon_Transverse
CKMT1A	15	43692886	43699222	0.0178149	3.08688	0.00202272	Breast_Mammary_Tissue
AKR1A1	1	45550543	45570049	0.102995	-3.08566	0.002031	Artery_Coronary
BAHD1	15	40439721	40468236	0.0278769	-3.08541	0.00203273	Testis
PRKCD	3	53156009	53192717	0.0781595	-3.0839	0.00204305	Heart_Atrial_Appendage
ZC3H7A	16	11750586	11797258	0.0191535	-3.08376	0.00204402	Artery_Tibial
ANKDD1A	15	64911902	64958691	0.0366767	-3.08304	0.002049	Brain_Cerebellum
NUS1	6	117675469	117710727	0.225989	3.0819	0.00205682	Adipose_Subcutaneous
PIBF1	13	72782133	73016461	0.0190806	-3.08094	0.00206345	Brain_Cortex
WASF2	1	27404230	27490167	0.199869	-3.08058	0.002066	Heart_Left_Ventricle
SEC24A	5	134648785	134727909	0.0278754	3.08057	0.00206607	Skin_Not_Sun_Exposed_Suprapubic
TUFT1	1	151540305	151583583	0.0103112	-3.07995	0.00207034	Skin_Not_Sun_Exposed_Suprapubic
PRPF40A	2	152651593	152718012	0.0528257	3.07986	0.002071	Stomach
KLHDC7B	22	50545899	50551023	0.0171216	-3.07964	0.00207253	Adipose_Subcutaneous
PTMS	12	6765516	6770952	0.0148607	-3.07845	0.00208079	Small_Intestine_Terminal_Ileum
CLCA4-AS1	1	86569024	86704484	0.0854682	-3.07768	0.00208619	Testis
HSPD1	2	197486584	197516737	0.187844	-3.07751	0.00208741	Testis
UBXN7	3	196347662	196432430	0.0426062	3.07732	0.00208872	Cells_EBV-transformed_lymphocytes
RPS6KA1	1	26529761	26575030	0.0776181	3.07563	0.0021006	Heart_Left_Ventricle
PTPRK	6	127968785	128520616	0.0101068	-3.07411	0.00211134	Adipose_Visceral_Omentum
RNF165	18	46326809	46463140	0.0115696	-3.0741	0.00211139	Lung
TIMMDC1	3	119498547	119525090	0.0151503	3.07345	0.00211598	Adipose_Visceral_Omentum
CRYBG1	6	106360717	106572017	0.0658067	3.07328	0.00211718	Brain_Hippocampus
DUS2	16	67987746	68079320	0.152512	3.0732	0.00211777	Whole_Blood
CNTN4-AS1	3	3039033	3069242	0.28968	-3.07303	0.00211895	Testis
KL	13	33016423	33066143	0.0582843	3.0716	0.00212914	Brain_Caudate_basal_ganglia
HTR4	5	148446042	148677235	0.0505782	-3.07144	0.0021303	Skin_Not_Sun_Exposed_Suprapubic
LINC01685	1	38474825	38516520	0.0220508	-3.07118	0.00213213	Cells_EBV-transformed_lymphocytes
PRKG2	4	81087370	81215222	0.178507	-3.07094	0.00213387	Esophagus_Gastroesophageal_Junction
CEL	9	133061981	133071861	0.0656472	3.07086	0.00213446	Small_Intestine_Terminal_Ileum
C1RL	12	7089587	7109238	0.057952	3.06983	0.0021418	Artery_Tibial
GPR61	1	109539872	109548406	0.167223	-3.06968	0.00214287	Nerve_Tibial
COPRS	17	31851871	31859291	0.0749863	-3.06903	0.00214755	Colon_Transverse
LINC01359	1	64972225	65002489	0.0553903	3.06902	0.00214766	Lung
RUFY4	2	218034960	218090584	0.0125428	3.06882	0.00214903	Spleen
ZNF761	19	53431984	53461862	0.303952	3.06864	0.00215034	Whole_Blood
CEP295	11	93661682	93730358	0.0811885	-3.06857	0.00215083	Brain_Spinal_cord_cervical_c-1
ME3	11	86441108	86672636	0.0727859	3.06849	0.0021514	Artery_Aorta
HMGA2-AS1	12	65851340	65882167	0.289744	3.06847	0.00215158	Thyroid
CUEDC1	17	57861243	57955412	0.0174143	3.06788	0.00215587	Cells_Cultured_fibroblasts
PLCB3	11	64251530	64269150	0.0363131	-3.06723	0.00216051	Muscle_Skeletal
ISLR	15	74173710	74176872	0.0186883	3.06703	0.00216196	Lung
DUSP16	12	12473282	12562863	0.0157205	3.06672	0.0021642	Minor_Salivary_Gland
ROPN1	3	123968521	123992178	0.0951325	-3.0663	0.00216724	Brain_Hypothalamus
MMD	17	55392622	55421924	0.0243175	-3.06628	0.0021674	Testis
ECE2	3	184276011	184293031	0.0471266	3.06513	0.00217573	Colon_Sigmoid
BUD31	7	99408641	99419616	0.155202	3.06496	0.002177	Brain_Hippocampus
SMIM26	20	18567347	18569563	0.0268654	-3.06456	0.00217991	Skin_Not_Sun_Exposed_Suprapubic
ZNF98	19	22391019	22532485	0.0311105	3.06379	0.00218554	Vagina
PSMB10	16	67934506	67936864	0.0806381	-3.06359	0.002187	Thyroid
CIAO3	16	729760	741329	0.0137409	3.06323	0.00218964	Skin_Sun_Exposed_Lower_leg
RGS13	1	192636138	192660311	0.204486	3.06263	0.002194	Artery_Tibial
ALDH1L1-AS2	3	126180012	126210169	0.0255551	-3.06246	0.00219524	Colon_Sigmoid
IRX6	16	55324203	55330756	0.0310767	-3.06229	0.0021965	Adipose_Visceral_Omentum
MAN2A1	5	109689927	109869625	0.0341335	3.06155	0.00220193	Esophagus_Muscularis
STAT5B	17	42199176	42288633	0.0148419	-3.06155	0.00220194	Nerve_Tibial
SEMA4B	15	90160604	90229679	0.027916	-3.05976	0.00221512	Lung
POLR3H	22	41525799	41544606	0.052626	-3.05905	0.00222044	Cells_EBV-transformed_lymphocytes
UBFD1	16	23557721	23574389	0.0775551	3.05878	0.00222242	Skin_Not_Sun_Exposed_Suprapubic
RAB3GAP2	1	220148293	220272529	0.0374502	3.05861	0.00222364	Brain_Spinal_cord_cervical_c-1
PART1	5	60487713	60548813	0.0910344	3.05814	0.00222715	Esophagus_Mucosa
OR6A2	11	6791736	6799689	0.0808295	-3.05759	0.00223127	Testis
TMEM225B	7	99598267	99611045	0.0326413	3.05742	0.00223254	Brain_Hippocampus
ADAP1	7	897900	955407	0.152043	3.05722	0.00223404	Prostate
SIX5	19	45764785	45769252	0.0668239	-3.05705	0.0022353	Heart_Left_Ventricle
MAST2	1	45786987	46036122	0.0461653	-3.05702	0.00223547	Stomach
PMEL	12	55954105	55973317	0.133002	-3.05467	0.00225306	Spleen
ZFAT	8	134477788	134713049	0.0382703	-3.05427	0.00225611	Muscle_Skeletal
LINC01735	1	208606564	208614295	0.157931	3.05426	0.00225619	Brain_Caudate_basal_ganglia
CTSB	8	11842524	11869533	0.128513	-3.05356	0.00226144	Skin_Not_Sun_Exposed_Suprapubic
PTPN2	18	12785478	12929643	0.143065	-3.05332	0.00226323	Brain_Caudate_basal_ganglia
TRUB1	10	114938195	114977676	0.0248178	3.05244	0.00226985	Vagina
LINC02158	3	42770600	42773785	0.0641381	3.05159	0.00227632	Artery_Coronary
B3GNT3	19	17794828	17813576	0.0208229	-3.051	0.00228077	Skin_Sun_Exposed_Lower_leg
COLEC12	18	316737	500722	0.391907	-3.05087	0.00228181	Pituitary
RASA2	3	141487027	141615344	0.036783	3.04835	0.002301	Thyroid
TBC1D10A	22	30291990	30326947	0.0172907	3.04751	0.00230745	Pancreas
ARHGAP27	17	45393902	45434421	0.0140132	-3.04652	0.00231508	Brain_Cerebellum
ZC3H12D	6	149446795	149485014	0.3492	-3.0464	0.00231597	Colon_Transverse
PDGFRB	5	150113839	150155872	0.0180325	-3.04564	0.00232187	Cells_EBV-transformed_lymphocytes
PDE6C	10	93612537	93666010	0.150644	-3.04509	0.00232613	Colon_Transverse
TP53BP1	15	43403061	43510728	0.0345274	3.0448	0.00232835	Artery_Coronary
CASD1	7	94509219	94557019	0.0629704	-3.0443	0.00233222	Uterus
PAWR	12	79574979	79690964	0.0656005	-3.04429	0.00233233	Artery_Tibial
FXYD2	11	117800844	117828698	0.090018	3.04391	0.00233524	Brain_Putamen_basal_ganglia
MTMR9	8	11284816	11328146	0.102219	3.04324	0.00234043	Prostate
GMDS	6	1623806	2245605	0.0379602	-3.04309	0.00234164	Breast_Mammary_Tissue
FAM201A	9	38620474	38624990	0.0244508	-3.04288	0.00234323	Heart_Left_Ventricle
NFAM1	22	42380407	42432403	0.141439	-3.04277	0.00234413	Pancreas
AATK	17	81110487	81166221	0.0453611	3.04255	0.00234583	Pituitary
PABPC1	8	100685816	100722809	0.0423862	3.04116	0.00235668	Pancreas
UNC5B	10	71212570	71302864	0.0143715	3.04091	0.00235864	Lung
CLCN6	1	11806096	11848079	0.0235694	3.04088	0.00235888	Adrenal_Gland
KRTAP5-8	11	71538025	71539209	0.0584414	3.04	0.00236579	Breast_Mammary_Tissue
MTFR1L	1	25818640	25832942	0.0378539	3.03988	0.00236669	Ovary
FAM167A	8	11421476	11475908	0.0303571	3.03637	0.00239448	Pituitary
WNT5B	12	1529891	1647212	0.027785	-3.03623	0.0023956	Stomach
HLA-DOA	6	33004182	33009591	0.0405848	-3.03571	0.00239973	Pancreas
TYRO3	15	41557675	41583589	0.174643	3.03555	0.00240097	Stomach
KIAA0040	1	175156986	175192999	0.060551	3.03469	0.00240782	Minor_Salivary_Gland
PRSS8	16	31131433	31135727	0.153591	3.03442	0.00240995	Thyroid
SLC25A44	1	156193932	156212796	0.0676109	-3.03401	0.00241329	Nerve_Tibial
TLL2	10	96364608	96513926	0.0672962	3.03284	0.00242264	Muscle_Skeletal
STAT5A	17	42287547	42311943	0.0396413	3.03234	0.00242665	Thyroid
CDKN2B-AS1	9	21994139	22128103	0.0240193	3.03185	0.00243059	Spleen
UBA7	3	49805209	49813953	0.0247131	3.03173	0.00243156	Muscle_Skeletal
EDC4	16	67873052	67884499	0.0239132	3.03169	0.0024319	Whole_Blood
ZFAND3	6	37819727	38154624	0.0267277	3.02921	0.00245191	Testis
GIMAP7	7	150514872	150521073	0.0626762	3.02874	0.00245577	Heart_Atrial_Appendage
USP30-AS1	12	109052344	109053986	0.0232031	3.02857	0.00245712	Skin_Not_Sun_Exposed_Suprapubic
PRXL2B	1	2586491	2591469	0.0128439	3.02837	0.00245873	Brain_Hypothalamus
PLEKHA4	19	48837092	48868617	0.0459811	-3.02803	0.00246152	Ovary
TNFRSF11B	8	118923557	118951885	0.0388595	-3.02794	0.00246227	Lung
PROC	2	127418427	127429242	0.0575015	3.02732	0.00246733	Small_Intestine_Terminal_Ileum
C3orf62	3	49268596	49277232	0.236624	-3.02638	0.00247501	Pituitary
SGMS1	10	50305586	50625163	0.0297031	-3.02536	0.00248339	Pancreas
CRKL	22	20917407	20953747	0.0172303	3.02493	0.0024869	Artery_Tibial
LYPLAL1	1	219173869	219212865	0.0306923	-3.02476	0.00248831	Ovary
IFI6	1	27666064	27672212	0.0318757	3.02431	0.00249201	Esophagus_Mucosa
LINC00954	2	19868860	19885047	0.0206288	3.0238	0.00249621	Small_Intestine_Terminal_Ileum
XRN2	20	21303331	21389825	0.0550615	-3.02286	0.00250397	Brain_Nucleus_accumbens_basal_ganglia
MBLAC1	7	100126785	100128495	0.0357584	-3.02273	0.00250506	Lung
CACNA1H	16	1153103	1224169	0.119353	3.02263	0.00250586	Brain_Putamen_basal_ganglia
CPSF4	7	99438922	99457373	0.0329218	-3.02251	0.00250684	Cells_Cultured_fibroblasts
CLEC11A	19	50723364	50725708	0.0458094	-3.02216	0.00250976	Brain_Cortex
HERC6	4	88378739	88443097	0.0328873	3.0218	0.00251274	Brain_Nucleus_accumbens_basal_ganglia
TULP2	19	48880965	48898744	0.0487466	3.02132	0.00251677	Brain_Caudate_basal_ganglia
ZNF430	19	21020634	21060050	0.137771	3.02092	0.00252006	Cells_Cultured_fibroblasts
UTRN	6	144285335	144853034	0.0125494	3.01982	0.00252927	Prostate
ITIH2	10	7703316	7749520	0.0521837	-3.01927	0.00253383	Cells_EBV-transformed_lymphocytes
KDR	4	55078481	55125595	0.0397121	3.0189	0.00253694	Heart_Left_Ventricle
MLH3	14	75013769	75051532	0.0190117	3.01824	0.0025425	Testis
ADD3	10	109996368	110135565	0.0590393	-3.01748	0.00254888	Brain_Hypothalamus
LINC00426	13	30340267	30377145	0.0326117	3.01671	0.00255532	Thyroid
EPHA5	4	65319563	65670495	0.0847798	3.01526	0.00256759	Nerve_Tibial
WWP1	8	86342547	86478420	0.402522	3.01524	0.00256778	Nerve_Tibial
SLC5A11	16	24845841	24911628	0.05277	3.01522	0.0025679	Uterus
SLC12A2	5	128083766	128189677	0.444033	-3.01513	0.00256871	Esophagus_Mucosa
CRTC2	1	153947669	153958615	0.0598717	-3.01502	0.00256961	Heart_Left_Ventricle
AREL1	14	74653437	74713117	0.0710868	-3.01465	0.00257279	Lung
LINC00941	12	30755167	30802602	0.0164953	3.01458	0.00257333	Brain_Anterior_cingulate_cortex_BA24
SNU13	22	41673933	41690504	0.114389	3.01427	0.00257599	Skin_Not_Sun_Exposed_Suprapubic
UNC5CL	6	41026895	41039221	0.0178281	3.01402	0.00257813	Uterus
CBX1	17	48070052	48101478	0.0452737	3.01373	0.00258054	Thyroid
SPHK1	17	76376584	76387860	0.0731783	-3.01342	0.00258324	Nerve_Tibial
PPARD	6	35342558	35428191	0.0236771	3.01285	0.0025881	Esophagus_Muscularis
GFOD2	16	67674531	67719339	0.0187823	-3.01258	0.00259038	Brain_Cortex
LRP1	12	57128483	57213361	0.073196	3.01255	0.00259063	Artery_Coronary
INAFM1	19	47274885	47275723	0.0677753	3.01154	0.00259923	Thyroid
PPARGC1B	5	149730298	149855022	0.0264224	3.01033	0.00260967	Skin_Not_Sun_Exposed_Suprapubic
INTS6-AS1	13	51452364	51554678	0.0133662	-3.00994	0.00261301	Esophagus_Muscularis
BTBD19	1	44808523	44815585	0.0108234	-3.00968	0.00261526	Brain_Cerebellar_Hemisphere
MRPL57	13	21176658	21179084	0.023873	-3.00953	0.00261653	Brain_Cerebellar_Hemisphere
DVL3	3	184155377	184173614	0.0224671	3.00937	0.00261786	Heart_Atrial_Appendage
LAMA5-AS1	20	62352970	62356480	0.183442	-3.00926	0.00261883	Uterus
DNAJC22	12	49346888	49357546	0.0970252	3.00902	0.00262092	Testis
SHF	15	45167214	45201175	0.14157	3.00895	0.00262156	Brain_Cerebellar_Hemisphere
BCCIP	10	125823546	125853695	0.246189	-3.00882	0.00262267	Testis
YARS	1	32775237	32818031	0.0651587	-3.00876	0.00262313	Muscle_Skeletal
ST6GAL2	2	106801600	106887108	0.0196622	3.00835	0.00262668	Brain_Cortex
GTF3C5	9	133030675	133058503	0.0346521	3.00831	0.00262704	Colon_Sigmoid
KCTD19	16	67289428	67326760	0.0438308	3.00811	0.00262881	Adipose_Visceral_Omentum
RSPO2	8	107899316	108083642	0.0169773	3.00727	0.00263609	Heart_Atrial_Appendage
DBH	9	133636363	133659329	0.0437623	3.00683	0.00263987	Lung
GNG3	11	62707676	62709201	0.0583488	3.00601	0.002647	Liver
DMRTA2	1	50417550	50423443	0.0449759	3.0055	0.00265147	Esophagus_Mucosa
WDR81	17	1716523	1738599	0.0792378	-3.00515	0.00265453	Esophagus_Muscularis
ASPM	1	197084121	197146694	0.159098	3.00493	0.0026564	Colon_Transverse
C1orf229	1	247110160	247112417	0.0189611	-3.00492	0.00265651	Spleen
KDSR	18	63327726	63367228	0.149035	3.00481	0.00265743	Brain_Frontal_Cortex_BA9
GREM1	15	32718004	32745106	0.0449139	-3.00302	0.00267313	Skin_Not_Sun_Exposed_Suprapubic
GATAD2B	1	153789030	153923360	0.0187469	3.00235	0.002679	Brain_Hypothalamus
PIP5KL1	9	127920881	127930785	0.0366642	-3.00175	0.00268433	Vagina
SPIDR	8	47260878	47736306	0.0780653	3.00158	0.00268578	Brain_Nucleus_accumbens_basal_ganglia
NCMAP	1	24556087	24609328	0.0374841	-3.00096	0.0026913	Heart_Atrial_Appendage
ADCY1	7	45574140	45723116	0.152919	-3.0009	0.0026918	Stomach
ACO1	9	32384603	32454769	0.0450093	-3.00051	0.00269527	Cells_Cultured_fibroblasts
UCHL5	1	193012250	193060080	0.106197	-3	0.00269979	Heart_Atrial_Appendage
MRPL34	19	17292609	17306843	0.0169912	2.99989	0.00270075	Whole_Blood
ACVR2B-AS1	3	38451027	38454820	0.310274	2.99986	0.00270103	Brain_Cerebellum
MYO7B	2	127535683	127637729	0.125803	2.99982	0.00270142	Spleen
ALG12	22	49900229	49918438	0.492592	-2.99834	0.00271452	Brain_Cortex
OPRD1	1	28812170	28871267	0.097218	-2.99797	0.00271783	Testis
GABARAP	17	7240008	7242449	0.131686	2.99787	0.00271878	Adrenal_Gland
RANBP6	9	6011025	6015625	0.0232126	-2.99784	0.002719	Heart_Left_Ventricle
TMEM267	5	43444252	43483893	0.0114591	2.99596	0.00273581	Thyroid
ZNF573	19	37735833	37817300	0.0102959	2.99428	0.00275094	Colon_Sigmoid
AHNAK	11	62433542	62556235	0.0328972	2.99422	0.00275143	Testis
MZT1	13	72708367	72727629	0.0133513	2.99346	0.00275837	Colon_Transverse
CD163	12	7470811	7503893	0.0329092	2.9932	0.00276068	Nerve_Tibial
LINC01230	9	1045625	1048641	0.0166565	2.99305	0.002762	Minor_Salivary_Gland
RRP12	10	97356358	97426076	0.0664934	2.99302	0.00276232	Whole_Blood
DNM1	9	128191655	128255248	0.343756	-2.99258	0.0027663	Small_Intestine_Terminal_Ileum
TMEM254	10	80078646	80092557	0.0331701	2.99221	0.0027697	Brain_Substantia_nigra
GP6	19	55013705	55038264	0.0792747	2.99218	0.00276992	Heart_Left_Ventricle
DOCK8	9	214854	465259	0.0558626	-2.99203	0.00277126	Brain_Frontal_Cortex_BA9
LGMN	14	92703807	92748679	0.0243138	-2.99191	0.00277234	Whole_Blood
DNAJC13	3	132417502	132539032	0.0215297	-2.99175	0.00277379	Cells_EBV-transformed_lymphocytes
S100A7	1	153457744	153460651	0.0456506	-2.99111	0.00277968	Uterus
USP47	11	11841423	11961887	0.044665	2.99092	0.00278137	Brain_Cerebellar_Hemisphere
PPOX	1	161166056	161178013	0.129251	2.99014	0.00278847	Artery_Coronary
ECHDC2	1	52895910	52927212	0.0779333	2.99002	0.00278959	Cells_EBV-transformed_lymphocytes
SENP3	17	7561919	7571969	0.119563	-2.9891	0.00279797	Brain_Cerebellar_Hemisphere
ANKRD10	13	110878540	110915069	0.0397073	2.98829	0.0028054	Small_Intestine_Terminal_Ileum
IL16	15	81159575	81314058	0.0820986	-2.9877	0.00281084	Adipose_Visceral_Omentum
TMEM170A	16	75443054	75465497	0.0175978	2.98768	0.00281105	Whole_Blood
RIMS2	8	103500610	104254430	0.0310559	2.98726	0.00281493	Esophagus_Muscularis
GLRA3	4	174636920	174829247	0.106642	2.98721	0.00281536	Brain_Cerebellar_Hemisphere
PINK1-AS	1	20642657	20652193	0.0474871	-2.98686	0.00281857	Brain_Caudate_basal_ganglia
CRB2	9	123356170	123380324	0.0995813	-2.98591	0.00282735	Artery_Coronary
NACC1	19	13116862	13141147	0.0328295	-2.98548	0.00283137	Esophagus_Muscularis
SMIM15-AS1	5	61162070	61232040	0.0163354	2.98461	0.00283945	Nerve_Tibial
NUP107	12	68686951	68745809	0.0106174	2.98454	0.0028401	Whole_Blood
SQLE	8	124998497	125022283	0.029951	2.98447	0.00284069	Brain_Nucleus_accumbens_basal_ganglia
CADM4	19	43622368	43639850	0.022283	2.98395	0.00284554	Pituitary
DFFA	1	10456522	10472529	0.0222038	-2.98393	0.00284569	Uterus
ATP1B2	17	7646627	7657770	0.0445551	-2.98368	0.00284809	Brain_Putamen_basal_ganglia
P2RY13	3	151326312	151329549	0.0523747	-2.98229	0.00286105	Cells_EBV-transformed_lymphocytes
CYP1B1-AS1	2	38073447	38231651	0.0531985	2.98224	0.00286149	Colon_Transverse
HP	16	72054505	72061055	0.0244542	-2.98164	0.0028671	Kidney_Cortex
USP4	3	49277144	49340712	0.125581	2.9812	0.00287122	Thyroid
CDA	1	20589086	20618903	0.0222102	-2.98036	0.00287908	Brain_Cerebellum
MTMR11	1	149928651	149936879	0.109635	-2.98034	0.00287929	Ovary
DOCK9-DT	13	99087819	99088625	0.0570968	-2.98032	0.00287948	Testis
PM20D2	6	89146055	89165565	0.0713913	2.97997	0.00288273	Esophagus_Mucosa
TNRC6B	22	40044817	40335808	0.109608	-2.97958	0.00288642	Artery_Tibial
REV1	2	99400475	99490035	0.0629702	-2.97944	0.00288775	Adipose_Subcutaneous
ANKRD18B	9	33524251	33608848	0.0437751	-2.97865	0.00289526	Brain_Cortex
ATIC	2	215311956	215349773	0.0799411	2.97837	0.00289786	Brain_Substantia_nigra
TPH1	11	18017555	18046269	0.305076	-2.97765	0.0029047	Liver
B4GALT3	1	161171310	161177968	0.0934768	-2.97702	0.00291067	Adrenal_Gland
FAM177A1	14	35045117	35116630	0.0180694	-2.97677	0.00291301	Pancreas
C1QA	1	22635077	22639678	0.0226923	2.97664	0.00291422	Esophagus_Mucosa
HTR5A-AS1	7	155067034	155072450	0.0245329	2.97643	0.00291622	Brain_Caudate_basal_ganglia
NPPA	1	11845709	11848345	0.0430264	2.97614	0.002919	Brain_Cerebellar_Hemisphere
GPR63	6	96794125	96837477	0.0262669	2.97584	0.00292186	Ovary
KALRN	3	124033369	124726325	0.0364529	-2.97581	0.00292219	Thyroid
CLDN23	8	8701937	8704096	0.32901	2.97519	0.00292804	Heart_Left_Ventricle
STRBP	9	123109500	123268586	0.0633683	-2.9746	0.00293372	Muscle_Skeletal
ATP6V1C1	8	103021063	103073051	0.0255237	-2.97436	0.00293599	Brain_Substantia_nigra
S100A14	1	153614255	153616986	0.0789489	-2.97428	0.00293673	Breast_Mammary_Tissue
TBC1D2	9	98199011	98255649	0.0227388	2.97422	0.00293732	Brain_Frontal_Cortex_BA9
RABIF	1	202878282	202889149	0.241323	-2.97362	0.00294313	Skin_Sun_Exposed_Lower_leg
BCL2	18	63123346	63320128	0.0253078	2.97248	0.00295407	Brain_Cerebellar_Hemisphere
MRPS18A	6	43671202	43687791	0.0279503	2.9715	0.00296346	Testis
MUS81	11	65857126	65867653	0.0306581	2.97147	0.00296377	Brain_Nucleus_accumbens_basal_ganglia
LINC01572	16	72236281	72665014	0.0498924	-2.97134	0.002965	Cells_Cultured_fibroblasts
FBXO21	12	117141991	117190470	0.0137894	-2.97127	0.00296569	Pituitary
ZMPSTE24	1	40258041	40294180	0.0510334	2.97024	0.00297567	Pancreas
TFEB	6	41683978	41736259	0.0273035	2.96971	0.00298078	Colon_Transverse
L3HYPDH	14	59460363	59484408	0.0187051	2.9685	0.00299255	Brain_Substantia_nigra
CASKIN1	16	2177180	2196605	0.504676	2.96817	0.00299581	Thyroid
ITPKC	19	40717112	40740860	0.0456687	-2.96798	0.00299761	Liver
PANK3	5	168548495	168579368	0.155614	2.9633	0.00304361	Stomach
PPP4R1	18	9546791	9615240	0.0279767	2.96321	0.00304451	Esophagus_Mucosa
PDP1	8	93857807	93926068	0.011307	2.96303	0.00304628	Brain_Cortex
CTSD	11	1752752	1764573	0.0227104	-2.96294	0.00304719	Vagina
LINC01943	2	87439523	87459044	0.0731535	-2.96289	0.00304766	Minor_Salivary_Gland
UBAP2	9	33921693	34049388	0.0619346	-2.96213	0.00305523	Brain_Putamen_basal_ganglia
PDCD6IP	3	33798571	33869707	0.0400295	2.96202	0.00305629	Brain_Amygdala
KLHL3	5	137617500	137736089	0.0574831	-2.96164	0.0030601	Brain_Spinal_cord_cervical_c-1
PRSS36	16	31138926	31150083	0.0399132	2.9613	0.00306347	Cells_Cultured_fibroblasts
ARHGEF26	3	154121003	154257827	0.0458395	2.9611	0.00306539	Breast_Mammary_Tissue
ZBTB6	9	122908056	122913323	0.0822925	2.96021	0.00307434	Brain_Substantia_nigra
GSTA1	6	52791371	52803860	0.0375926	2.96	0.00307635	Brain_Substantia_nigra
TNS3	7	47275154	47582558	0.0597829	2.95981	0.00307834	Lung
PTN	7	137227341	137343774	0.0296212	2.9591	0.00308541	Brain_Hypothalamus
TLCD1	17	28724348	28727935	0.0744197	2.95891	0.00308725	Cells_Cultured_fibroblasts
RNF216	7	5620047	5781696	0.0424861	2.9575	0.00310145	Artery_Tibial
UQCC1	20	35302566	35412031	0.0208531	-2.9574	0.00310242	Pancreas
CTNNB1	3	41194741	41260096	0.080259	2.95656	0.00311091	Testis
CHML	1	241628851	241640369	0.0323844	-2.95625	0.00311406	Skin_Sun_Exposed_Lower_leg
RRP7A	22	42508344	42519796	0.0317268	-2.95613	0.00311525	Whole_Blood
MNX1	7	156994051	157010663	0.347528	2.956	0.0031166	Brain_Cerebellum
SEMA4A	1	156147366	156177752	0.022651	2.95535	0.00312313	Adipose_Subcutaneous
AKIRIN2	6	87674860	87702233	0.214783	-2.95522	0.00312445	Small_Intestine_Terminal_Ileum
KIR3DL3	19	54724442	54736632	0.0318128	-2.95498	0.00312685	Spleen
RPS15	19	1438358	1440495	0.0188558	-2.95455	0.00313123	Minor_Salivary_Gland
TFIP11	22	26491225	26512505	0.0434909	-2.95402	0.00313661	Brain_Cerebellar_Hemisphere
ASIC2	17	33013087	34174964	0.150767	2.95387	0.00313812	Nerve_Tibial
CLIC1	6	31730581	31739763	0.205032	2.95315	0.0031455	Liver
PDAP1	7	99392048	99408597	0.0665127	-2.9529	0.00314805	Esophagus_Mucosa
ZNF205	16	3112560	3120517	0.0105257	2.95257	0.00315139	Whole_Blood
ACADVL	17	7217125	7225266	0.405841	2.95217	0.00315551	Skin_Not_Sun_Exposed_Suprapubic
ARHGEF7-AS2	13	111113812	111115678	0.0194705	-2.9516	0.00316128	Prostate
LHX1	17	36936785	36944612	0.0328137	2.95109	0.00316656	Brain_Cortex
AP2M1	3	184174689	184184214	0.0275838	2.94996	0.00317819	Nerve_Tibial
RAB13	1	153981617	153986358	0.01116	2.94917	0.00318628	Esophagus_Gastroesophageal_Junction
EXOSC1	10	97435909	97446017	0.0243646	2.94879	0.00319024	Esophagus_Mucosa
AKIP1	11	8911139	8920084	0.0535478	-2.94834	0.00319488	Nerve_Tibial
HNRNPUL1	19	41262496	41307787	0.229141	-2.94799	0.00319844	Brain_Putamen_basal_ganglia
MCL1	1	150560895	150579738	0.0284011	2.94764	0.00320212	Cells_Cultured_fibroblasts
MCF2L-AS1	13	112967484	112968824	0.0515481	-2.94757	0.00320282	Esophagus_Muscularis
LLPH	12	66116555	66130750	0.0307103	2.94748	0.0032037	Brain_Nucleus_accumbens_basal_ganglia
PROCR	20	35172072	35216240	0.0333719	2.94698	0.0032089	Cells_EBV-transformed_lymphocytes
PRKAG1	12	49002274	49018807	0.0968763	-2.94611	0.003218	Brain_Frontal_Cortex_BA9
MICB	6	31494881	31511124	0.0479743	-2.94413	0.00323863	Esophagus_Muscularis
NAMPT	7	106248298	106285966	0.375339	-2.94409	0.00323907	Minor_Salivary_Gland
GALNTL6	4	171812254	173041559	0.0351602	2.94393	0.00324073	Testis
HLF	17	55264960	55325187	0.0503301	-2.94335	0.00324686	Kidney_Cortex
PRDM8	4	80183879	80204329	0.338916	2.94332	0.00324711	Spleen
C9orf16	9	128160265	128163924	0.118447	-2.94318	0.00324856	Adipose_Subcutaneous
SLC8A1	2	40097270	40611053	0.0179218	-2.94246	0.00325615	Pituitary
PKD2L1	10	100288149	100330264	0.0371378	2.94213	0.00325964	Brain_Nucleus_accumbens_basal_ganglia
COBLL1	2	164653624	164843679	0.0993257	-2.94176	0.00326354	Pancreas
SSBP1	7	141738334	141787922	0.0576144	2.94171	0.00326401	Minor_Salivary_Gland
COX6B1	19	35648323	35658782	0.0291965	-2.94158	0.00326539	Kidney_Cortex
SERPINE3	13	51335773	51364735	0.0975861	2.94027	0.00327922	Adipose_Visceral_Omentum
ZNF24	18	35332227	35345482	0.0325981	2.94006	0.00328153	Whole_Blood
TYMP	22	50525752	50530032	0.101295	-2.93956	0.00328681	Brain_Cerebellum
TSPAN33	7	129144707	129169699	0.165439	2.93824	0.00330076	Brain_Substantia_nigra
PUM3	9	2720469	2844095	0.104849	2.93807	0.00330262	Nerve_Tibial
FAT1	4	186587794	186726722	0.0882558	-2.93795	0.00330394	Esophagus_Muscularis
HMGB2	4	173331376	173334432	0.0387422	-2.93667	0.00331756	Colon_Transverse
SLC12A3	16	56865207	56915850	0.0116831	2.9365	0.00331937	Pancreas
ACRBP	12	6638075	6647433	0.0245176	2.93583	0.00332659	Brain_Substantia_nigra
COQ7	16	19067614	19080095	0.0354727	-2.93542	0.00333099	Muscle_Skeletal
ITGB4	17	75721328	75757818	0.0550675	2.93422	0.00334388	Adipose_Visceral_Omentum
RNF150	4	140859807	141212877	0.0183098	-2.93412	0.00334497	Muscle_Skeletal
TMEM250	9	136114581	136118875	0.0270147	-2.93334	0.00335337	Muscle_Skeletal
CETP	16	56961923	56983845	0.0867146	-2.93282	0.00335895	Adipose_Visceral_Omentum
PAQR7	1	25861484	25875708	0.0180027	2.93259	0.0033615	Artery_Coronary
PDE1B	12	54549601	54579239	0.0196805	2.93205	0.00336734	Ovary
ADCY9	16	3953387	4116442	0.108106	-2.9319	0.003369	Minor_Salivary_Gland
XBP1	22	28794555	28800597	0.0537313	2.93182	0.00336978	Whole_Blood
SFMBT2	10	7158624	7411488	0.0187692	-2.93119	0.00337664	Pituitary
CCDC84-DT	11	118994824	118998004	0.034972	-2.9311	0.00337766	Brain_Anterior_cingulate_cortex_BA24
ZDHHC13	11	19117099	19176422	0.0577147	2.93071	0.00338193	Cells_EBV-transformed_lymphocytes
SPINT1	15	40844018	40858207	0.0557444	-2.93044	0.00338477	Heart_Left_Ventricle
PTEN	10	87862638	87971930	0.0139312	-2.93024	0.00338695	Pancreas
IPPK	9	92613183	92670131	0.247799	-2.92942	0.00339594	Testis
SPSB1	1	9292894	9369532	0.045256	-2.92893	0.00340133	Thyroid
CASC18	12	105704203	105744062	0.0105638	2.92813	0.00341003	Artery_Aorta
ACLY	17	41866917	41930542	0.300967	-2.92809	0.00341049	Thyroid
GLIS1	1	53506237	53739164	0.100624	2.92713	0.00342111	Cells_Cultured_fibroblasts
TNNI2	11	1838981	1841680	0.112184	-2.92699	0.00342264	Vagina
C1QL4	12	49332409	49337188	0.085254	2.92683	0.00342436	Testis
CSNK1E	22	38290691	38318084	0.473006	-2.92478	0.003447	Skin_Sun_Exposed_Lower_leg
MAP3K14	17	45263119	45317029	0.0104606	2.92413	0.0034542	Cells_EBV-transformed_lymphocytes
SACM1L	3	45689056	45745412	0.0314815	-2.92365	0.0034595	Colon_Sigmoid
PINK1	1	20633458	20651511	0.0241697	2.92268	0.00347036	Artery_Aorta
OCLN	5	69492292	69558104	0.0258918	2.92266	0.00347052	Pituitary
C9orf50	9	129612225	129621101	0.157483	-2.92176	0.00348055	Lung
SH3RF2	5	145936578	146081791	0.0231402	-2.92065	0.00349304	Adrenal_Gland
CYP2R1	11	14877440	14892231	0.326153	-2.92044	0.00349539	Small_Intestine_Terminal_Ileum
GBA	1	155234452	155244699	0.0409252	-2.91888	0.00351287	Brain_Putamen_basal_ganglia
PPP1R14B-AS1	11	64245838	64248221	0.0448708	2.91863	0.00351575	Skin_Not_Sun_Exposed_Suprapubic
RBM23	14	22893204	22919182	0.0468596	-2.91856	0.00351647	Brain_Cortex
EHBP1L1	11	65576046	65592650	0.215614	-2.91764	0.00352691	Brain_Amygdala
CD93	20	23079360	23086324	0.044444	-2.91697	0.00353449	Whole_Blood
CSMD2	1	33513998	34165842	0.309045	2.91676	0.00353687	Cells_Cultured_fibroblasts
ATF5	19	49928702	49933935	0.174625	2.91641	0.00354081	Brain_Anterior_cingulate_cortex_BA24
KIF5A	12	57546026	57586633	0.0747099	2.91609	0.00354452	Pancreas
GPATCH2L	14	76151916	76254342	0.0195005	-2.91552	0.00355102	Esophagus_Muscularis
DEDD	1	161120974	161132688	0.13962	2.91501	0.00355678	Adipose_Subcutaneous
SLC22A10	11	63268022	63311783	0.0109875	-2.91425	0.00356546	Brain_Nucleus_accumbens_basal_ganglia
NT5C2	10	103087185	103277605	0.0317235	2.91423	0.00356567	Vagina
MTTP	4	99564081	99623997	0.0370837	2.91418	0.00356622	Cells_EBV-transformed_lymphocytes
SLC22A3	6	160348378	160452577	0.0988964	-2.91298	0.00358	Colon_Transverse
HSD11B2	16	67430652	67437553	0.1214	-2.91255	0.00358493	Pancreas
TMEM169	2	216081866	216102783	0.0165329	2.91146	0.00359741	Artery_Aorta
PAPLN	14	73237497	73274640	0.0259134	-2.91001	0.00361422	Skin_Not_Sun_Exposed_Suprapubic
PDE8B	5	77210449	77428256	0.317913	-2.90914	0.00362425	Colon_Sigmoid
AURKA	20	56369389	56392337	0.278132	2.90865	0.00362992	Esophagus_Mucosa
DNASE2B	1	84398484	84415018	0.0170118	-2.90833	0.00363369	Brain_Caudate_basal_ganglia
ZYG11A	1	52842511	52894998	0.0229005	2.90822	0.00363491	Ovary
ZFHX3	16	72782885	73891871	0.0339423	2.908	0.00363751	Testis
ACOT13	6	24667035	24705065	0.162632	2.90768	0.00364125	Heart_Atrial_Appendage
VIPAS39	14	77426675	77457952	0.293856	-2.90738	0.00364469	Cells_Cultured_fibroblasts
DLEU1	13	50082169	50906856	0.036445	-2.90679	0.00365158	Whole_Blood
SOX15	17	7588178	7590094	0.0293322	-2.90651	0.0036548	Adipose_Visceral_Omentum
ACSL5	10	112374116	112428379	0.0314451	2.90597	0.0036612	Stomach
WBP4	13	41061509	41084006	0.0851961	-2.9052	0.00367022	Brain_Nucleus_accumbens_basal_ganglia
RPS10	6	34417454	34426069	0.0194042	-2.90501	0.00367244	Muscle_Skeletal
NUPR1	16	28532708	28539008	0.0697846	2.90401	0.0036842	Breast_Mammary_Tissue
RHEB	7	151466012	151520120	0.0469292	-2.90347	0.00369056	Artery_Aorta
SLC46A3	13	28700064	28718970	0.100426	2.90344	0.00369084	Heart_Atrial_Appendage
TPTE2	13	19422876	19561625	0.0971147	2.90316	0.00369413	Artery_Tibial
ORM1	9	114323098	114326479	0.0426954	2.90308	0.00369517	Lung
RBM34	1	235131183	235161283	0.0412897	2.90274	0.00369912	Brain_Caudate_basal_ganglia
IZUMO1	19	48740852	48746909	0.0202456	2.90273	0.00369921	Testis
CLDN1	3	190305707	190322446	0.199108	2.90246	0.0037024	Testis
PAIP2B	2	71182738	71227103	0.118301	2.902	0.00370792	Thyroid
ZFAND2B	2	219195237	219209651	0.0102369	-2.90168	0.0037117	Skin_Not_Sun_Exposed_Suprapubic
GAS7	17	9910606	10198606	0.0146383	-2.90126	0.00371665	Artery_Tibial
ZNF687-AS1	1	151279678	151282000	0.0380569	-2.90106	0.003719	Pituitary
BPNT1	1	220057482	220090462	0.0178102	-2.90084	0.00372161	Artery_Aorta
AGAP3	7	151085831	151144436	0.0178407	2.90081	0.003722	Breast_Mammary_Tissue
TMEM175	4	932387	958656	0.0135258	2.90078	0.00372238	Heart_Left_Ventricle
SSPN	12	26121991	26299290	0.0776524	2.90064	0.00372405	Testis
FAM71E2	19	55354908	55363260	0.165099	-2.90063	0.00372416	Brain_Cerebellar_Hemisphere
DAB1	1	56994778	58546734	0.127003	-2.9003	0.0037281	Pituitary
LINC00304	16	89159146	89164245	0.161868	-2.89977	0.00373442	Heart_Left_Ventricle
ENKD1	16	67662945	67667265	0.040142	2.89957	0.00373676	Pancreas
CLDN9	16	3012923	3014505	0.0263965	-2.89953	0.0037372	Small_Intestine_Terminal_Ileum
SSR1	6	7268306	7347446	0.089657	-2.89824	0.00375269	Pituitary
CDH17	8	94127162	94217303	0.0793671	-2.8982	0.00375312	Artery_Tibial
IPO11	5	62403972	62628582	0.0139698	-2.89801	0.00375541	Adipose_Subcutaneous
PTPN3	9	109375466	109498313	0.0320083	2.8979	0.00375669	Colon_Sigmoid
SWT1	1	185157080	185291781	0.0132808	-2.89724	0.0037646	Nerve_Tibial
MSL1	17	40121971	40136917	0.106432	-2.89693	0.00376833	Cells_Cultured_fibroblasts
AQP11	11	77589391	77610356	0.0624384	2.89676	0.00377034	Testis
RHBDF1	16	58059	76355	0.170033	-2.89646	0.00377398	Brain_Nucleus_accumbens_basal_ganglia
UTP6	17	31860904	31901708	0.0233231	-2.8963	0.00377588	Brain_Putamen_basal_ganglia
FBP1	9	94603133	94640249	0.0631959	2.89558	0.00378464	Adipose_Visceral_Omentum
MRTFA	22	40410281	40636719	0.0177523	-2.89548	0.00378583	Brain_Caudate_basal_ganglia
LINC02761	11	76210956	76216025	0.0897779	2.89466	0.00379569	Uterus
EMID1	22	29205896	29259597	0.0452724	-2.89434	0.00379955	Brain_Anterior_cingulate_cortex_BA24
DHX35	20	38962299	39039723	0.0418379	-2.89411	0.00380234	Liver
CGN	1	151510510	151538692	0.0243309	-2.89402	0.00380348	Ovary
ZNF599	19	34758073	34773229	0.025151	-2.89392	0.00380469	Heart_Left_Ventricle
POGLUT1	3	119468963	119494708	0.0213578	-2.89366	0.00380784	Brain_Nucleus_accumbens_basal_ganglia
IL17B	5	149371324	149404202	0.271702	-2.89327	0.00381257	Colon_Sigmoid
RPS8	1	44775251	44778779	0.0244263	-2.89269	0.00381959	Pituitary
TEPP	16	57976435	57988116	0.115646	2.89171	0.00383151	Brain_Frontal_Cortex_BA9
PLA2G10	16	14672548	14694308	0.107788	2.89013	0.00385079	Colon_Transverse
COMMD10	5	116085016	116412762	0.017571	-2.88937	0.00386015	Small_Intestine_Terminal_Ileum
RIOK2	5	97160867	97183247	0.0420621	2.88879	0.00386723	Esophagus_Mucosa
DPAGT1	11	119096025	119108331	0.0586544	2.88825	0.00387386	Vagina
COMMD8	4	47450787	47463702	0.0760108	-2.8882	0.00387452	Skin_Sun_Exposed_Lower_leg
ZNF560	19	9466355	9498616	0.0104257	2.88742	0.00388412	Thyroid
MED13	17	61942605	62065278	0.0571756	-2.88728	0.00388586	Cells_Cultured_fibroblasts
MAPK10	4	85990007	86594625	0.0859751	2.88715	0.00388744	Stomach
C1S	12	6988259	7071032	0.0269927	-2.88682	0.00389155	Brain_Cerebellum
ARHGAP12	10	31805398	31928876	0.0276114	-2.88679	0.00389198	Lung
PLA2G6	22	38111495	38214778	0.0284111	2.88677	0.00389216	Liver
ASAH2B	10	50739318	50816495	0.222814	2.88638	0.00389705	Brain_Substantia_nigra
TMEM106B	7	12211270	12243367	0.208162	2.88613	0.00390006	Cells_Cultured_fibroblasts
PARP11	12	3791047	3873448	0.0234398	-2.88588	0.00390319	Brain_Putamen_basal_ganglia
GALNT3	2	165747588	165794659	0.0823052	2.88578	0.00390449	Brain_Hippocampus
TTF1	9	132375548	132406851	0.154467	2.88513	0.00391254	Esophagus_Gastroesophageal_Junction
WDR86	7	151375909	151410727	0.0217329	2.88487	0.0039158	Pituitary
CHCHD10	22	23765834	23767972	0.0622665	-2.88437	0.00392192	Small_Intestine_Terminal_Ileum
EPDR1	7	37920640	37951936	0.154699	-2.88417	0.0039245	Testis
EXOC6	10	92826831	93059493	0.164296	-2.88373	0.00393	Adipose_Subcutaneous
AGK	7	141551278	141655244	0.0360489	2.88348	0.00393303	Brain_Substantia_nigra
LRR1	14	49598761	49614672	0.0743099	-2.88216	0.00394961	Pancreas
XYLB	3	38346760	38421348	0.0458315	-2.88121	0.00396152	Adrenal_Gland
SELP	1	169588849	169630193	0.0669504	-2.88113	0.00396252	Whole_Blood
FAM182B	20	25762384	25868225	0.0474909	2.88067	0.00396828	Esophagus_Muscularis
KAZALD1	10	101061989	101068131	0.335369	2.88056	0.00396965	Adrenal_Gland
SNRNP25	16	53828	57669	0.0438099	-2.88045	0.00397103	Skin_Not_Sun_Exposed_Suprapubic
MPZL2	11	118253416	118264536	0.36505	2.88032	0.00397274	Whole_Blood
MS4A15	11	60756867	60776733	0.141704	2.87975	0.00397996	Lung
SLC7A13	8	86214063	86321146	0.0780965	2.87942	0.0039841	Prostate
EDEM1	3	5187646	5219958	0.0270244	2.87939	0.0039844	Brain_Amygdala
FCHO2	5	72956041	73090522	0.0866319	2.87934	0.00398509	Brain_Cerebellum
ZNF384	12	6666477	6689572	0.0720458	2.8792	0.00398686	Brain_Cerebellum
LINC01484	5	173707614	173746279	0.121482	-2.87787	0.00400364	Testis
COIL	17	56938199	56961050	0.0682635	2.87757	0.00400753	Cells_Cultured_fibroblasts
ZNF274	19	58183029	58213562	0.0131266	-2.87722	0.0040119	Cells_Cultured_fibroblasts
S100A4	1	153543613	153550136	0.0328336	-2.87697	0.00401511	Liver
PER1	17	8140472	8156506	0.0313808	2.87676	0.00401784	Artery_Tibial
DAAM1	14	59188646	59371405	0.0153735	-2.87665	0.0040192	Brain_Spinal_cord_cervical_c-1
FANCC	9	95099054	95426796	0.0509984	-2.87654	0.00402066	Prostate
CORO7	16	4354542	4425705	0.0584748	2.87628	0.00402391	Kidney_Cortex
ETAA1	2	67397322	67412089	0.0974451	2.87584	0.00402956	Esophagus_Gastroesophageal_Junction
FAM83D	20	38926312	38953106	0.0370479	2.87564	0.00403211	Esophagus_Muscularis
TPO	2	1374066	1543711	0.453812	-2.87518	0.00403792	Thyroid
ADRA2A	10	111077029	111080907	0.397591	2.87514	0.00403851	Pancreas
HSPB9	17	42122804	42123352	0.0165124	-2.87504	0.0040398	Spleen
MSRA	8	10054292	10428891	0.0267002	2.87488	0.00404179	Brain_Nucleus_accumbens_basal_ganglia
FBXO27	19	38990714	39032785	0.12313	2.8738	0.00405568	Colon_Sigmoid
RASSF2	20	4780023	4823608	0.0855355	-2.87363	0.00405782	Whole_Blood
HOXB7	17	48607232	48633572	0.0242479	-2.87355	0.00405882	Esophagus_Muscularis
GYPE	4	143870864	143905563	0.0106662	-2.87325	0.00406267	Kidney_Cortex
MAP3K7CL	21	29077221	29175889	0.1063	-2.87301	0.00406587	Brain_Frontal_Cortex_BA9
SLC35F1	6	117907264	118317676	0.0533916	2.87186	0.00408069	Adrenal_Gland
XPO1	2	61476032	61538741	0.070724	-2.8711	0.00409052	Brain_Cerebellar_Hemisphere
PCNX3	11	65615776	65637439	0.0561557	2.87081	0.00409421	Adrenal_Gland
CCDC17	1	45620044	45624057	0.0314205	-2.87063	0.00409656	Cells_EBV-transformed_lymphocytes
KAT8	16	31114489	31131393	0.0296568	2.87058	0.00409724	Brain_Anterior_cingulate_cortex_BA24
PLOD1	1	11934205	11975538	0.180977	-2.86989	0.00410616	Skin_Not_Sun_Exposed_Suprapubic
PIK3R1	5	68215740	68301821	0.0133133	-2.86942	0.0041122	Stomach
C4orf36	4	86876205	86892422	0.0150331	2.869	0.00411768	Colon_Sigmoid
EIF4A3	17	80134369	80147151	0.0469994	-2.86846	0.0041248	Whole_Blood
CYP26C1	10	93060798	93069540	0.026872	2.86825	0.00412744	Brain_Hypothalamus
R3HCC1L	10	98134624	98244897	0.0485054	2.86784	0.00413285	Adipose_Visceral_Omentum
ISG20	15	88635670	88656483	0.0180606	2.86761	0.00413585	Testis
MARCH6	3	149517235	149736714	0.2961	-2.86668	0.00414798	Esophagus_Mucosa
MARCH5	21	45338590	45341990	0.0541933	2.86632	0.00415273	Artery_Tibial
MARCH1	2	84905656	84906671	0.0113472	2.86567	0.0041613	Brain_Cerebellar_Hemisphere
MARCH7	2	197515571	197553699	0.0171802	2.86505	0.0041694	Spleen
MARCH8	16	80597907	80804598	0.050967	2.8648	0.00417274	Brain_Putamen_basal_ganglia
MARCH9	4	10068089	10116972	0.0312424	2.86446	0.0041772	Muscle_Skeletal
MARCH4	17	7626234	7627876	0.0341737	-2.86445	0.00417734	Colon_Sigmoid
GLI4	8	143267433	143276931	0.0149591	-2.86419	0.0041808	Cells_EBV-transformed_lymphocytes
CLTA	9	36190856	36304781	0.192419	2.86412	0.00418163	Esophagus_Mucosa
MEG8	14	100894770	101038859	0.0924695	2.86385	0.00418523	Liver
HIST1H2AC	6	26124145	26139116	0.0231884	2.86343	0.00419076	Pancreas
IFT88	13	20567138	20691444	0.058468	2.86136	0.0042183	Brain_Spinal_cord_cervical_c-1
LYRM4	6	5103629	5260950	0.0203762	-2.86033	0.00423198	Kidney_Cortex
IWS1	2	127436207	127526886	0.178584	-2.86025	0.00423307	Heart_Atrial_Appendage
CSTF3	11	33077188	33162371	0.200973	-2.86018	0.00423395	Artery_Tibial
DIXDC1	11	111927144	112022653	0.0265023	2.85973	0.00424	Brain_Hippocampus
CCDC51	3	48432164	48440456	0.015199	-2.85956	0.00424236	Brain_Cerebellar_Hemisphere
LINC00543	13	27953526	27955370	0.0496898	-2.85904	0.00424925	Adrenal_Gland
CCDC112	5	115267190	115296693	0.0296943	-2.85871	0.00425368	Esophagus_Mucosa
ANAPC4	4	25377263	25418498	0.0318263	2.8584	0.00425778	Testis
SLC12A8	3	125082636	125212864	0.0242283	2.85832	0.00425892	Brain_Frontal_Cortex_BA9
PIK3C2B	1	204422628	204494805	0.197418	-2.85827	0.00425951	Brain_Anterior_cingulate_cortex_BA24
ADAMTSL4	1	150549369	150560937	0.240383	2.85789	0.00426462	Artery_Aorta
GET4	7	876554	896436	0.0576036	2.85735	0.00427193	Uterus
MSMB	10	46033307	46048180	0.24984	2.85717	0.00427442	Stomach
PRLHR	10	118589997	118595648	0.042857	2.85705	0.00427593	Brain_Cerebellar_Hemisphere
TIMD4	5	156919292	156963226	0.20165	2.85676	0.00427988	Brain_Caudate_basal_ganglia
MCM7	7	100092233	100101940	0.0590204	-2.85649	0.00428348	Adipose_Visceral_Omentum
RDH16	12	56951431	56959374	0.0430752	2.85647	0.00428377	Liver
ANP32E	1	150218417	150236156	0.0371701	-2.85631	0.00428597	Heart_Atrial_Appendage
CAPN8	1	223538007	223665723	0.0315595	-2.8563	0.00428606	Prostate
AP2S1	19	46838136	46850846	0.0227368	2.85483	0.00430593	Lung
RALGAPA1	14	35538352	35809304	0.146771	-2.85378	0.00432018	Vagina
SKAP1	17	48133442	48430275	0.131721	-2.85373	0.00432086	Skin_Sun_Exposed_Lower_leg
RPS6	9	19375715	19380236	0.359278	2.85337	0.0043258	Small_Intestine_Terminal_Ileum
CYP4F26P	9	33580695	33607874	0.0108749	-2.85274	0.00433438	Brain_Hippocampus
VIPR2	7	159028175	159144867	0.116796	2.85269	0.0043351	Artery_Aorta
SPC24	19	11131520	11155807	0.18278	2.8521	0.00434316	Pituitary
ROR2	9	91563091	91950228	0.113165	-2.85206	0.00434366	Brain_Anterior_cingulate_cortex_BA24
TEX52	12	2849046	2857039	0.106613	-2.85177	0.00434763	Artery_Coronary
EIF5B	2	99337389	99401326	0.0753168	-2.85098	0.00435842	Heart_Atrial_Appendage
LINC02360	4	11740948	11769468	0.019875	2.85094	0.00435903	Testis
ZNF492	19	22634324	22667671	0.0141445	-2.85045	0.00436571	Testis
EIF4G3	1	20806292	21177285	0.0151593	-2.85036	0.004367	Pituitary
VEGFA	6	43770184	43786487	0.183938	-2.84927	0.004382	Minor_Salivary_Gland
GOLT1A	1	204198163	204213988	0.0538388	-2.84868	0.00439006	Esophagus_Muscularis
FKBP2	11	64241003	64244132	0.0453642	2.84816	0.00439732	Brain_Hypothalamus
MAN1A1	6	119177205	119349761	0.0181006	-2.84811	0.00439803	Minor_Salivary_Gland
FAM155A	13	107163510	107867496	0.0228197	2.84766	0.0044042	Thyroid
RHBDD3	22	29259872	29268209	0.0475733	2.8475	0.0044064	Brain_Putamen_basal_ganglia
MAMDC4	9	136850943	136860799	0.0521965	-2.84688	0.00441496	Small_Intestine_Terminal_Ileum
SHPK	17	3608240	3636250	0.136115	2.84687	0.0044152	Adrenal_Gland
KLC2	11	66257294	66267860	0.0364484	-2.84583	0.00442954	Esophagus_Muscularis
SFN	1	26863149	26864456	0.37222	-2.84577	0.00443043	Colon_Transverse
POMGNT2	3	43079229	43106085	0.0172889	2.84534	0.00443645	Cells_EBV-transformed_lymphocytes
PARD6G-AS1	18	80147908	80179839	0.0394692	-2.84503	0.00444072	Liver
PPP1R12B	1	202348699	202592706	0.128295	2.84447	0.00444854	Kidney_Cortex
FASTKD2	2	206765357	206796189	0.0772771	2.84445	0.00444885	Whole_Blood
PGPEP1	19	18340598	18369950	0.0958052	2.84398	0.00445541	Kidney_Cortex
MKRN2	3	12557057	12586208	0.0118343	-2.8438	0.00445794	Minor_Salivary_Gland
ATP5F1C	10	7788147	7807815	0.0744528	-2.8434	0.00446348	Brain_Frontal_Cortex_BA9
ERICH6	3	150659885	150703971	0.0858176	2.84322	0.004466	Brain_Caudate_basal_ganglia
HSCB	22	28742039	28757515	0.0334497	-2.84313	0.00446728	Adrenal_Gland
LINC00960	3	75672251	75742048	0.0280717	2.8429	0.0044705	Brain_Putamen_basal_ganglia
LINC01106	2	110375138	110384442	0.0801994	2.84207	0.00448216	Thyroid
MICOS10	1	19484403	19629821	0.416664	2.84149	0.00449037	Cells_EBV-transformed_lymphocytes
RSAD1	17	50478860	50485974	0.151276	-2.84141	0.00449141	Brain_Anterior_cingulate_cortex_BA24
PFDN2	1	161100556	161118055	0.041454	2.84132	0.00449279	Adipose_Visceral_Omentum
SGCD	5	155870344	156767788	0.0556144	-2.84114	0.00449528	Brain_Putamen_basal_ganglia
LINC00293	8	46822174	46907309	0.0337931	2.84082	0.00449983	Testis
TAL2	9	105662457	105663124	0.0922386	-2.84071	0.00450133	Brain_Putamen_basal_ganglia
STRC	15	43599563	43618800	0.0130487	2.84067	0.00450195	Skin_Not_Sun_Exposed_Suprapubic
NIT1	1	161118086	161125445	0.0654409	-2.84064	0.0045023	Muscle_Skeletal
NDFIP1	5	142108779	142154440	0.234265	2.84017	0.00450901	Esophagus_Mucosa
UBE4A	11	118359600	118399211	0.0385984	2.83997	0.00451183	Pancreas
U2SURP	3	142964497	143060725	0.0400562	-2.83995	0.00451203	Testis
LINC01785	19	22615551	22623980	0.0490111	-2.8399	0.00451281	Brain_Cerebellar_Hemisphere
PARD6A	16	67660946	67662774	0.017916	-2.8394	0.00451986	Small_Intestine_Terminal_Ileum
MRPS30	5	44808947	44820428	0.0646363	-2.83922	0.00452236	Colon_Transverse
ODF3B	22	50529710	50532506	0.0319632	-2.83867	0.00453018	Brain_Cerebellum
USP18	22	18150118	18177397	0.012053	-2.83758	0.00454573	Brain_Hypothalamus
DLAT	11	112025033	112064404	0.0629575	2.83735	0.004549	Skin_Not_Sun_Exposed_Suprapubic
C1QTNF7	4	15339818	15446167	0.0326433	2.8373	0.00454966	Artery_Aorta
NLN	5	65722205	65871725	0.0264108	2.83723	0.00455071	Liver
LINC00658	20	5426892	5471094	0.113284	-2.83709	0.00455271	Brain_Anterior_cingulate_cortex_BA24
PRKCH	14	61187559	61550976	0.0347443	-2.83678	0.00455707	Lung
SNRPN	15	24823637	24978723	0.15234	-2.83608	0.00456704	Esophagus_Gastroesophageal_Junction
MLEC	12	120687149	120701859	0.0464781	-2.83573	0.00457213	Colon_Transverse
CATSPER2	15	43628503	43668118	0.0356545	2.83558	0.00457427	Stomach
ZNF208	19	21932958	22010949	0.0516414	2.83544	0.00457632	Spleen
GRN	17	44345246	44353106	0.191209	2.83437	0.0045916	Lung
RAD50	5	132556019	132646349	0.095027	-2.8341	0.00459551	Uterus
POLR3B	12	106357748	106510198	0.0111425	2.83381	0.00459972	Brain_Cerebellum
CBR1	21	36069941	36073166	0.0687638	-2.83326	0.00460766	Colon_Transverse
HSPA4	5	133052013	133106449	0.034518	2.8322	0.00462289	Pancreas
EPHA5-AS1	4	65669961	65698029	0.276495	2.8322	0.00462293	Nerve_Tibial
PDS5B	13	32586452	32778019	0.0993791	2.83198	0.00462601	Stomach
PRR15	7	29563835	29567293	0.0943998	2.83169	0.00463029	Spleen
HHIPL1	14	99645129	99680569	0.017706	2.83123	0.00463697	Minor_Salivary_Gland
RCSD1	1	167630093	167708696	0.033228	-2.83117	0.00463787	Small_Intestine_Terminal_Ileum
LOX	5	122063195	122078413	0.0848694	-2.83105	0.00463958	Artery_Coronary
TLX1NB	10	101089321	101131126	0.19579	-2.83062	0.00464581	Spleen
FSCN2	17	81528377	81537130	0.0254988	-2.83034	0.00464981	Minor_Salivary_Gland
ZCWPW1	7	100400826	100428992	0.0211387	2.8301	0.00465329	Muscle_Skeletal
MAPK13	6	36127809	36144524	0.126888	-2.83008	0.00465361	Stomach
SSBP4	19	18418864	18434562	0.234688	-2.83002	0.00465451	Adipose_Visceral_Omentum
METTL9	16	21597218	21657471	0.0571851	-2.82921	0.00466634	Brain_Amygdala
DENND4A	15	65658046	65792293	0.0468408	2.82905	0.0046687	Whole_Blood
CASC3	17	40140318	40172171	0.0642527	2.82896	0.00466992	Brain_Amygdala
MYZAP	15	57591904	57685364	0.0545613	-2.8286	0.00467521	Pituitary
RAF1	3	12582101	12664201	0.0826178	-2.82851	0.00467652	Artery_Aorta
C2orf49	2	105337532	105349211	0.0452563	2.82771	0.00468826	Testis
TMEM160	19	47045909	47048624	0.0150816	-2.82752	0.004691	Brain_Anterior_cingulate_cortex_BA24
CDC37L1	9	4679559	4708399	0.0140054	2.82744	0.00469216	Muscle_Skeletal
DNAH17-AS1	17	78484882	78503056	0.0572592	2.82744	0.0046922	Brain_Spinal_cord_cervical_c-1
TDRD12	19	32719753	32829580	0.20404	2.82719	0.00469581	Artery_Coronary
SLPI	20	45252239	45254564	0.287869	2.82663	0.00470401	Whole_Blood
ASXL1	20	32358330	32439319	0.0373847	2.82658	0.00470478	Cells_Cultured_fibroblasts
RBFA	18	80034389	80050651	0.0182036	2.82643	0.00470705	Muscle_Skeletal
RIPPLY3	21	37006150	37019662	0.0101618	2.82631	0.00470882	Liver
EPAS1	2	46293667	46386697	0.257309	2.8261	0.00471181	Heart_Left_Ventricle
PHLDA1	12	76025447	76031776	0.034899	-2.82526	0.00472426	Testis
SLC35E4	22	30635781	30669016	0.01013	2.82511	0.00472638	Small_Intestine_Terminal_Ileum
LRP6	12	12116025	12267044	0.0711377	-2.82491	0.00472945	Brain_Hypothalamus
NDE1	16	15643267	15734691	0.146457	2.82477	0.00473142	Esophagus_Gastroesophageal_Junction
RETREG2	2	219176225	219185475	0.0325809	-2.82469	0.00473269	Artery_Coronary
THOC5	22	29505879	29555216	0.12059	-2.82457	0.00473445	Brain_Anterior_cingulate_cortex_BA24
TMEM265	16	30740642	30745196	0.0343532	2.8244	0.00473696	Colon_Transverse
LINC02422	12	31876969	31959333	0.027593	2.82426	0.00473902	Adipose_Visceral_Omentum
XRCC6	22	41621163	41664048	0.0422716	-2.82412	0.004741	Nerve_Tibial
LINC02599	8	48590401	48594621	0.071136	-2.82317	0.00475517	Skin_Sun_Exposed_Lower_leg
DICER1-AS1	14	95157645	95181475	0.0705145	-2.82226	0.00476863	Heart_Left_Ventricle
S100A5	1	153537147	153541765	0.0220408	2.8222	0.00476952	Thyroid
ITCH	20	34363235	34511773	0.0286366	-2.82207	0.00477147	Heart_Atrial_Appendage
NBEA	13	34942270	35673022	0.014709	-2.82182	0.00477525	Whole_Blood
USP21	1	161159450	161165723	0.0214184	-2.82125	0.00478374	Cells_Cultured_fibroblasts
PDZRN4	12	41188320	41574745	0.0119717	-2.8208	0.00479041	Thyroid
LDLRAD3	11	35943981	36232136	0.0186018	2.82075	0.00479111	Pancreas
CHADL	22	41229510	41240931	0.0101053	-2.82049	0.00479499	Heart_Left_Ventricle
TMEM19	12	71686082	71705047	0.0404717	2.82001	0.00480222	Whole_Blood
BMP3	4	81030708	81057627	0.0253328	2.81919	0.00481456	Minor_Salivary_Gland
UBE2F	2	237966827	238042782	0.0139977	2.81914	0.0048152	Kidney_Cortex
UMAD1	7	7640711	7968020	0.095521	-2.81876	0.00482092	Pituitary
LINC01315	22	42364387	42369290	0.171881	-2.81847	0.00482528	Ovary
ABLIM3	5	149141483	149260542	0.368042	-2.81808	0.00483124	Small_Intestine_Terminal_Ileum
LINC01947	5	166905222	166926370	0.0723722	2.81761	0.0048382	Testis
NTRK3-AS1	15	88252730	88271066	0.0328147	2.81694	0.00484836	Brain_Cortex
CFL2	14	34709113	34714823	0.0898663	2.81658	0.00485375	Adipose_Subcutaneous
LINC01361	1	82970820	82986208	0.0240824	2.81644	0.00485584	Skin_Sun_Exposed_Lower_leg
MRPL42	12	93467514	93516214	0.0913891	2.81584	0.00486503	Esophagus_Gastroesophageal_Junction
ZNF532	18	58862600	58986480	0.0303129	-2.81559	0.00486872	Artery_Tibial
CCDC88B	11	64340204	64357534	0.349376	2.81519	0.00487483	Heart_Atrial_Appendage
FKBP15	9	113161006	113221458	0.0904849	-2.81476	0.00488143	Muscle_Skeletal
MBTD1	17	51177425	51260163	0.128	-2.81472	0.004882	Colon_Sigmoid
PARP9	3	122527924	122564577	0.292867	2.81464	0.00488322	Liver
PDE10A	6	165327287	165988117	0.0181811	2.81452	0.00488506	Lung
MS4A3	11	60056587	60071115	0.117736	2.81431	0.00488821	Adipose_Subcutaneous
FAM207A	21	44940025	44976973	0.0350885	-2.81369	0.00489768	Testis
GPATCH4	1	156594301	156601496	0.0112372	-2.81353	0.00490013	Brain_Cerebellar_Hemisphere
WASF3	13	26557683	26688948	0.0189504	-2.81329	0.00490367	Brain_Cerebellar_Hemisphere
LINC00472	6	71187161	71420745	0.130572	2.8132	0.00490511	Artery_Tibial
TMEM141	9	136791344	136793317	0.283911	-2.81276	0.00491186	Esophagus_Muscularis
NR2C1	12	95020229	95073628	0.0542194	-2.81273	0.00491235	Adipose_Subcutaneous
TGFB1	19	41301587	41353922	0.0294802	-2.81208	0.00492223	Prostate
QSOX2	9	136206333	136245812	0.039654	2.81166	0.00492862	Skin_Not_Sun_Exposed_Suprapubic
FAM151A	1	54609181	54623556	0.0585868	-2.81162	0.00492922	Heart_Atrial_Appendage
CTU2	16	88706483	88715396	0.0343398	-2.81147	0.00493163	Muscle_Skeletal
NFKBIZ	3	101827991	101861022	0.0262329	2.8109	0.00494024	Breast_Mammary_Tissue
SP100	2	230415942	230545606	0.0834181	2.81023	0.00495057	Artery_Tibial
FRA10AC1	10	93667883	93702592	0.0199831	-2.8102	0.00495101	Brain_Nucleus_accumbens_basal_ganglia
LINC01470	5	152618965	153223543	0.0614418	-2.81014	0.00495195	Testis
PARP4	13	24420931	24512778	0.373462	-2.81011	0.00495251	Cells_Cultured_fibroblasts
MORC2-AS1	22	30922308	30932449	0.0158599	-2.80986	0.00495637	Nerve_Tibial
SCYL1	11	65525077	65538704	0.214033	2.80972	0.0049584	Testis
EPB41	1	28887091	29120046	0.0244422	2.80962	0.00496	Brain_Cerebellum
UBR7	14	93207241	93229215	0.0120086	2.80812	0.00498324	Brain_Caudate_basal_ganglia
TTBK1	6	43243481	43288258	0.254896	2.80779	0.00498825	Esophagus_Gastroesophageal_Junction
PYGL	14	50857891	50944483	0.0422859	-2.80776	0.00498874	Brain_Cortex
PRELID2	5	145471799	145835369	0.0182508	2.80683	0.00500313	Brain_Spinal_cord_cervical_c-1
DBH-AS1	9	133654586	133657313	0.0634596	2.80644	0.00500915	Heart_Left_Ventricle
MIR324	17	7223297	7223379	0.045651	-2.80611	0.00501438	Artery_Aorta
CRACR2B	11	826144	831991	0.0874099	2.806	0.00501611	Esophagus_Muscularis
TRAF3IP2-AS1	6	111483459	111598783	0.0282117	2.8056	0.00502233	Brain_Frontal_Cortex_BA9
PDE4D	5	58969038	60522120	0.115102	2.80548	0.00502417	Thyroid
CXXC4-AS1	4	104490849	104734546	0.094994	2.80547	0.00502428	Testis
PITRM1	10	3137728	3172841	0.0137198	-2.8053	0.00502692	Skin_Not_Sun_Exposed_Suprapubic
TCIRG1	11	68039025	68050895	0.0474348	-2.80493	0.00503269	Artery_Tibial
PRXL2C	9	96639577	96655317	0.316177	2.80463	0.0050375	Nerve_Tibial
TBC1D8	2	101007228	101252866	0.0362842	-2.80428	0.00504287	Thyroid
TXNDC9	2	99318982	99340702	0.0222095	-2.80311	0.00506127	Testis
JPH1	8	74234700	74321540	0.0166589	-2.80305	0.00506216	Colon_Transverse
GRAMD4	22	46576012	46679790	0.20857	2.80296	0.00506357	Adipose_Visceral_Omentum
DNASE1	16	3611728	3680143	0.0384305	2.80131	0.00508951	Pancreas
KLHL26	19	18637025	18671721	0.0626302	2.80081	0.00509742	Esophagus_Mucosa
KCNQ3	8	132120861	132481095	0.192273	2.80076	0.00509825	Minor_Salivary_Gland
XIRP2-AS1	2	167123904	167140955	0.0185549	2.80044	0.00510327	Testis
PPP2R5C	14	101761709	101927989	0.0306073	2.80031	0.00510534	Adipose_Visceral_Omentum
PDIA2	16	283164	287215	0.354319	-2.80016	0.00510766	Esophagus_Gastroesophageal_Junction
LETM2	8	38386207	38409527	0.0150705	2.79996	0.00511097	Brain_Cerebellum
TMC2	20	2536573	2643580	0.0243774	-2.79975	0.00511415	Testis
LINC00689	7	159006522	159030195	0.0278758	2.79921	0.00512283	Artery_Tibial
ARHGEF5	7	144355288	144380632	0.344297	-2.7991	0.00512457	Cells_EBV-transformed_lymphocytes
ANKRD18A	9	38540567	38620596	0.0158062	-2.79848	0.00513438	Esophagus_Muscularis
AZIN2	1	33081104	33123492	0.0307307	2.79846	0.00513477	Cells_Cultured_fibroblasts
SNTB2	16	69187147	69309052	0.120401	2.79838	0.00513593	Whole_Blood
DERL3	22	23834503	23839128	0.0187457	-2.79788	0.005144	Esophagus_Mucosa
KCNK1	1	233614106	233672514	0.102633	2.79768	0.00514718	Testis
CACNA2D3	3	54122552	55074557	0.0101259	2.79758	0.00514864	Minor_Salivary_Gland
SERINC5	5	80111651	80256048	0.0170715	2.79732	0.00515284	Small_Intestine_Terminal_Ileum
CAV2	7	116287380	116508541	0.0500575	-2.79706	0.00515693	Brain_Nucleus_accumbens_basal_ganglia
REC114	15	73443164	73560013	0.120468	2.79662	0.00516397	Heart_Left_Ventricle
MEF2C-AS1	5	88883328	89466398	0.0881053	2.7965	0.0051659	Spleen
PANK1	10	89579497	89645242	0.0206949	-2.79637	0.00516806	Vagina
TSPAN17	5	176647387	176659054	0.0442295	2.79581	0.005177	Liver
TMEM74	8	108606850	108787594	0.114867	-2.79574	0.00517806	Brain_Frontal_Cortex_BA9
LINC00640	14	51333068	51365557	0.023041	2.79525	0.00518596	Spleen
PNKD	2	218269651	218346793	0.0501003	2.79506	0.005189	Colon_Transverse
TMEM134	11	67461710	67469272	0.0503521	2.79476	0.00519375	Cells_Cultured_fibroblasts
ASPHD2	22	26429260	26445015	0.0139606	2.79472	0.00519452	Spleen
ZNF628	19	55476617	55484487	0.0123346	-2.7944	0.0051996	Whole_Blood
TJP3	19	3708362	3750813	0.050198	-2.79438	0.00519985	Lung
ENDOD1	11	95089846	95132645	0.0211659	2.7938	0.00520922	Brain_Putamen_basal_ganglia
UBXN4	2	135741734	135785056	0.0471796	2.79369	0.005211	Brain_Spinal_cord_cervical_c-1
TXLNB	6	139240061	139291998	0.0841679	2.79333	0.00521682	Testis
LINC01357	1	112849821	112877878	0.0581359	2.79213	0.00523627	Cells_Cultured_fibroblasts
SH3PXD2A-AS1	10	103745966	103755423	0.0860228	-2.79201	0.00523813	Nerve_Tibial
MAN1B1	9	137086857	137109189	0.0971794	2.79198	0.00523873	Testis
EIF4A1	17	7572824	7579006	0.0193688	-2.7916	0.00524479	Cells_Cultured_fibroblasts
C11orf21	11	2295628	2303049	0.168103	-2.79149	0.00524667	Cells_EBV-transformed_lymphocytes
C1orf115	1	220690363	220699153	0.0103059	2.79143	0.0052475	Adrenal_Gland
KLRC4	12	10407384	10409757	0.434158	-2.79032	0.0052656	Esophagus_Gastroesophageal_Junction
FOXP2	7	114086327	114693772	0.12754	2.7903	0.00526592	Brain_Caudate_basal_ganglia
MICAL2	11	12094008	12359144	0.0624935	2.78996	0.00527152	Heart_Left_Ventricle
PARD3B	2	204545475	205620162	0.0382978	2.78989	0.00527258	Adrenal_Gland
ECD	10	73130155	73169055	0.0366108	-2.78976	0.00527466	Small_Intestine_Terminal_Ileum
GTF3C4	9	132670035	132694953	0.0223712	2.78968	0.00527596	Cells_Cultured_fibroblasts
POU2AF1	11	111352255	111455630	0.137226	-2.78959	0.0052775	Testis
NEURL1	10	103493705	103592546	0.0305997	-2.78943	0.00528012	Esophagus_Muscularis
UBAP1L	15	65092760	65115200	0.0483156	-2.78938	0.00528087	Esophagus_Mucosa
TRIM22	11	5689610	5737089	0.0229612	-2.78932	0.00528192	Esophagus_Muscularis
ARHGEF10	8	1823926	1958641	0.0291425	2.7889	0.00528875	Pancreas
MGAT5B	17	76868404	76950393	0.126291	-2.78884	0.00528968	Brain_Caudate_basal_ganglia
DLG4	17	7187187	7219841	0.15136	2.78875	0.00529114	Muscle_Skeletal
LINC01827	2	195569628	195572970	0.0698965	2.7883	0.00529847	Brain_Cortex
NOL10	2	10562347	10689987	0.0853195	-2.78818	0.00530049	Cells_Cultured_fibroblasts
KIAA1324L	7	86876906	87059654	0.0398094	-2.78816	0.00530076	Brain_Cortex
MIIP	1	12019466	12032045	0.0275239	-2.7877	0.00530845	Colon_Transverse
LINC02709	11	9754770	9759533	0.0256096	-2.78767	0.0053088	Muscle_Skeletal
SLC16A4	1	110362851	110391082	0.0687103	2.78759	0.00531013	Esophagus_Gastroesophageal_Junction
TK1	17	78174091	78187233	0.014674	-2.78732	0.00531455	Brain_Cerebellar_Hemisphere
WWC2-AS2	4	183097017	183099199	0.0951745	-2.78731	0.00531469	Vagina
CABYR	18	24138987	24161600	0.15532	-2.78728	0.00531531	Adipose_Subcutaneous
ISOC1	5	129094749	129114028	0.0678929	-2.78711	0.00531807	Nerve_Tibial
TRAPPC6B	14	39147811	39170532	0.012875	2.78679	0.00532322	Small_Intestine_Terminal_Ileum
LYSMD2	15	51723011	51751585	0.0143646	2.78615	0.00533374	Brain_Hypothalamus
LTBP2	14	74498183	74612378	0.0813666	-2.78523	0.00534897	Artery_Aorta
ZNF781	19	37668579	37676393	0.0291923	-2.78448	0.00536135	Brain_Nucleus_accumbens_basal_ganglia
KLHDC8B	3	49171598	49176486	0.079441	2.78447	0.00536154	Esophagus_Mucosa
ZNF512B	20	63956704	63969930	0.215212	2.78436	0.0053633	Brain_Cerebellar_Hemisphere
NUF2	1	163266576	163355764	0.0470454	2.78411	0.00536754	Small_Intestine_Terminal_Ileum
CLIP2	7	74289407	74405935	0.0617099	-2.78352	0.00537734	Whole_Blood
THOC6	16	3024027	3027755	0.0716972	2.78242	0.00539549	Artery_Aorta
CCDC78	16	722582	726954	0.0233338	-2.78199	0.00540265	Colon_Transverse
CSTF2T	10	51695486	51699595	0.0149705	-2.78174	0.00540683	Nerve_Tibial
JADE2	5	134524312	134583230	0.111994	2.78155	0.00541003	Brain_Cerebellar_Hemisphere
PAX9	14	36657568	36679362	0.0298194	2.78153	0.00541038	Cells_EBV-transformed_lymphocytes
MEAK7	16	84476355	84554033	0.0502321	2.78102	0.00541889	Pituitary
ARMC12	6	35737032	35749079	0.0403791	-2.78055	0.00542664	Testis
PSD3	8	18527303	19084730	0.0674354	2.78038	0.00542946	Pancreas
PTGER4	5	40679915	40693735	0.0348621	-2.77999	0.00543612	Colon_Sigmoid
TRAF6	11	36483769	36510272	0.112137	-2.77969	0.00544111	Esophagus_Mucosa
OR1F1	16	3188204	3224779	0.0198696	2.7791	0.00545095	Brain_Nucleus_accumbens_basal_ganglia
SLC49A4	3	122795069	122881139	0.0562181	2.77908	0.00545129	Skin_Not_Sun_Exposed_Suprapubic
RNASE2	14	20955487	20956436	0.0399272	-2.77881	0.00545581	Uterus
C6orf223	6	44000580	44007612	0.0708188	-2.77868	0.005458	Brain_Anterior_cingulate_cortex_BA24
NEDD4	15	55826922	55993660	0.0618621	2.77858	0.00545971	Skin_Not_Sun_Exposed_Suprapubic
LINC02057	5	61201304	61304811	0.0401719	-2.77823	0.00546567	Testis
KIF3B	20	32277651	32335011	0.0156351	-2.77805	0.00546866	Brain_Hypothalamus
TRPV1	17	3565444	3609411	0.0661516	2.77685	0.00548882	Brain_Nucleus_accumbens_basal_ganglia
TMTC1	12	29500840	29784759	0.0593721	2.77635	0.00549726	Heart_Atrial_Appendage
RABL6	9	136807943	136841187	0.124608	-2.7756	0.00550997	Small_Intestine_Terminal_Ileum
PKD2	4	88007635	88077777	0.020165	2.77529	0.00551522	Heart_Atrial_Appendage
TUBGCP4	15	43369221	43409771	0.0783759	-2.77527	0.00551554	Brain_Hypothalamus
TBX1	22	19756703	19783593	0.0160442	-2.77523	0.00551634	Adrenal_Gland
ASCL3	11	8937578	8943016	0.0549469	-2.77516	0.00551744	Minor_Salivary_Gland
SHANK1	19	50659255	50719802	0.023524	2.77466	0.005526	Esophagus_Gastroesophageal_Junction
VLDLR-AS1	9	2421597	2622457	0.0681737	2.77465	0.00552612	Stomach
AKR1B1	7	134442356	134459284	0.0648433	-2.77459	0.00552719	Adrenal_Gland
S100A13	1	153618787	153631360	0.037496	-2.77444	0.00552967	Colon_Sigmoid
CSRP3-AS1	11	19196775	19281426	0.181351	2.7744	0.00553039	Testis
PNPLA2	11	818914	825573	0.48638	2.77429	0.00553219	Pancreas
POPDC2	3	119636457	119665324	0.0485811	2.77422	0.00553348	Artery_Aorta
SLC12A7	5	1050384	1112063	0.0827701	-2.77394	0.00553811	Brain_Anterior_cingulate_cortex_BA24
NUDC	1	26900238	26946871	0.0247109	2.77317	0.0055513	Testis
PBX2	6	32184733	32190202	0.046217	2.77255	0.00556191	Pancreas
ZMAT5	22	29730956	29767011	0.0238772	2.77243	0.00556395	Whole_Blood
SLX4	16	3581181	3611606	0.0469535	2.77205	0.00557037	Esophagus_Mucosa
R3HDM1	2	135531455	135725270	0.0251184	-2.77142	0.00558121	Brain_Putamen_basal_ganglia
MPIG6B	6	31718594	31726714	0.0219255	-2.77054	0.00559632	Uterus
DYNC2LI1	2	43774039	43810010	0.0291482	-2.77032	0.00560011	Testis
TNFSF12	17	7548508	7557890	0.0507195	2.77028	0.0056009	Heart_Left_Ventricle
ZNF646	16	31074422	31084196	0.0832984	-2.76967	0.00561124	Heart_Left_Ventricle
CEP83	12	94306449	94459988	0.0383956	2.7691	0.00562118	Thyroid
BTBD16	10	122271296	122338159	0.090376	2.76833	0.00563444	Artery_Coronary
EVI2B	17	31303770	31314105	0.149036	2.7678	0.00564359	Esophagus_Muscularis
DUSP12	1	161749758	161757238	0.505025	2.76701	0.00565734	Thyroid
SNX18	5	54517759	54546586	0.0135159	-2.76697	0.00565797	Artery_Tibial
TIMELESS	12	56416363	56449426	0.0290243	-2.76682	0.00566053	Stomach
DEDD2	19	42198598	42220140	0.0306272	-2.76674	0.00566191	Vagina
TMEM107	17	8172457	8176399	0.0172986	2.7665	0.00566622	Brain_Cerebellum
HLX	1	220879431	220885059	0.0323533	-2.76646	0.00566679	Colon_Sigmoid
PLEKHG4B	5	92168	189972	0.0310518	-2.7664	0.00566786	Cells_Cultured_fibroblasts
GOLGA6L9	15	82429816	82439153	0.0124564	2.76606	0.00567376	Muscle_Skeletal
MYO1C	17	1464186	1492686	0.0215439	2.76568	0.00568049	Vagina
TRRAP	7	98877933	99050831	0.272582	2.76562	0.00568148	Adrenal_Gland
MAP1A	15	43510958	43531620	0.0549372	-2.76553	0.005683	Brain_Cerebellar_Hemisphere
A4GALT	22	42692121	42721298	0.0880619	2.76521	0.00568856	Adipose_Subcutaneous
CCSER1	4	90127394	91605295	0.0711545	-2.76448	0.00570144	Testis
ADAM12	10	126012381	126388477	0.15597	2.76421	0.00570605	Cells_Cultured_fibroblasts
LGALS9C	17	18476737	18494945	0.0857149	2.76387	0.0057121	Thyroid
MINDY1	1	150996549	151008376	0.235046	-2.76384	0.00571253	Prostate
LGALSL-DT	2	64395220	64453967	0.0585986	2.76313	0.00572494	Kidney_Cortex
DCBLD2	3	98795941	98901695	0.0358476	-2.76309	0.00572573	Esophagus_Muscularis
LTBP1	2	32946953	33399509	0.0852909	2.76267	0.00573309	Nerve_Tibial
SSNA1	9	137188660	137190370	0.0400218	2.76265	0.00573346	Vagina
FLRT3	20	14322985	14337614	0.0198754	2.76204	0.00574418	Liver
JMY	5	79236131	79327211	0.0404264	-2.76193	0.00574606	Whole_Blood
OARD1	6	41033627	41097787	0.0828657	-2.7618	0.00574842	Ovary
AGFG2	7	100539203	100568220	0.0730923	-2.76163	0.00575134	Nerve_Tibial
SPCS3	4	176319966	176332245	0.0608645	2.76078	0.00576638	Colon_Sigmoid
MEX3B	15	82041778	82046119	0.0264177	2.76023	0.00577608	Thyroid
C11orf45	11	128899565	128906044	0.125805	-2.75994	0.00578123	Artery_Aorta
MOAP1	14	93182199	93184923	0.010203	2.75967	0.00578593	Brain_Nucleus_accumbens_basal_ganglia
LINC00222	6	108751654	108769942	0.138434	-2.75958	0.00578765	Artery_Tibial
MAPK6	15	51952106	52067375	0.0880239	2.7594	0.00579078	Muscle_Skeletal
LSM2	6	31797396	31806966	0.0571055	2.75911	0.00579583	Skin_Sun_Exposed_Lower_leg
CERS3	15	100400395	100544995	0.0168826	2.75873	0.00580272	Colon_Transverse
SLC47A2	17	19678288	19718979	0.0154371	-2.75786	0.00581807	Ovary
SLC16A6	17	68267026	68291267	0.0899463	-2.75777	0.00581967	Whole_Blood
LINC00477	12	24566964	24584168	0.0307014	-2.75766	0.00582174	Testis
DLGAP2	8	737628	1708476	0.0453561	2.75763	0.00582214	Lung
EXOC3L1	16	67184379	67190185	0.151481	2.75758	0.00582316	Heart_Atrial_Appendage
COQ10A	12	56266890	56270966	0.0153151	-2.75658	0.00584085	Heart_Atrial_Appendage
TCTE3	6	169740109	169751587	0.0125192	2.75595	0.00585214	Heart_Atrial_Appendage
PTCH1	9	95442980	95517057	0.0187608	-2.75526	0.00586448	Artery_Tibial
TACSTD2	1	58575433	58577252	0.0143738	2.75498	0.00586966	Spleen
GSTA4	6	52977948	52995304	0.0299329	-2.75485	0.00587197	Liver
PXDN	2	1631887	1744852	0.0360372	2.75471	0.00587438	Pancreas
ZNF780B	19	40028260	40056231	0.129042	-2.75444	0.00587922	Nerve_Tibial
TTPA	8	63048553	63086053	0.0492929	-2.75442	0.00587955	Lung
ACYP1	14	75053237	75069483	0.0483226	-2.7544	0.00588	Small_Intestine_Terminal_Ileum
AP3M1	10	74120255	74150842	0.0696027	2.75435	0.00588087	Artery_Aorta
S100A8	1	153390032	153391073	0.0270179	-2.75409	0.00588563	Brain_Cortex
DIDO1	20	62877738	62937952	0.0492139	-2.75407	0.00588599	Skin_Sun_Exposed_Lower_leg
HAVCR1	5	157026742	157069396	0.0258644	-2.75405	0.00588625	Testis
DDX55	12	123602077	123620943	0.0888548	2.75405	0.00588628	Cells_Cultured_fibroblasts
HS6ST1	2	128236716	128318868	0.305292	-2.75383	0.00589021	Pituitary
UBA6-AS1	4	67701209	68080952	0.239924	-2.75377	0.00589125	Cells_EBV-transformed_lymphocytes
GNS	12	64713445	64759431	0.0477923	2.75373	0.00589205	Breast_Mammary_Tissue
C10orf55	10	73909969	73922777	0.0711486	2.75282	0.00590852	Skin_Not_Sun_Exposed_Suprapubic
LMAN2	5	177315805	177351840	0.0307779	-2.75227	0.00591845	Stomach
LINC02200	5	112628436	112682077	0.0143802	-2.75111	0.0059394	Pituitary
NCR3	6	31588895	31593006	0.0170531	-2.75107	0.00594004	Cells_EBV-transformed_lymphocytes
KANSL3	2	96593170	96642787	0.0698348	-2.75094	0.00594247	Spleen
PAK2	3	196739857	196832647	0.0740626	2.75017	0.00595643	Spleen
CDC42EP4	17	73283624	73312005	0.0173197	-2.7499	0.00596138	Brain_Substantia_nigra
PSMC3IP	17	42572310	42577831	0.186835	-2.74972	0.00596465	Brain_Putamen_basal_ganglia
RIPOR3	20	50586108	50691542	0.0375501	2.74959	0.005967	Uterus
KLHL32	6	96924620	97140754	0.0877944	-2.74958	0.00596716	Brain_Cerebellum
GK5	3	142157527	142225592	0.035126	2.74939	0.00597067	Small_Intestine_Terminal_Ileum
ZNF48	16	30378106	30400108	0.0514734	2.74932	0.00597193	Pituitary
NCOA6	20	34689097	34825651	0.0335605	-2.74892	0.00597925	Prostate
LLPH-DT	12	66130751	66134449	0.0477743	-2.74879	0.00598166	Brain_Putamen_basal_ganglia
DAXX	6	33318558	33323016	0.047657	-2.74827	0.00599105	Heart_Atrial_Appendage
TRIAP1	12	120443964	120446384	0.580691	2.74717	0.00601126	Brain_Substantia_nigra
SLFN11	17	35350305	35373701	0.0174988	2.74713	0.00601199	Adipose_Visceral_Omentum
AFDN	6	167826893	167972023	0.0465776	-2.74635	0.00602632	Skin_Sun_Exposed_Lower_leg
TMEM205	19	11342776	11346518	0.0688732	2.74536	0.00604445	Colon_Transverse
STON2	14	81260652	81436465	0.0904656	2.74513	0.00604861	Adrenal_Gland
GOLIM4	3	168008689	168095924	0.0433226	-2.74508	0.00604954	Colon_Transverse
LINC00690	3	16524771	16541903	0.0559508	-2.74504	0.00605027	Testis
MCM4	8	47960185	47978160	0.0641105	2.74496	0.00605185	Brain_Anterior_cingulate_cortex_BA24
NFATC2	20	51386957	51562831	0.0738231	2.74436	0.00606283	Kidney_Cortex
ZNF10	12	133130575	133159465	0.111446	2.74399	0.00606975	Prostate
S100PBP	1	32816767	32858875	0.0530639	2.74382	0.00607282	Brain_Cortex
C18orf65	18	76495521	76498088	0.0555521	2.74308	0.00608657	Lung
MYO7A	11	77128246	77215241	0.0384	-2.743	0.00608809	Artery_Coronary
RO60	1	193059454	193091777	0.049171	2.74234	0.00610031	Cells_Cultured_fibroblasts
ATXN7	3	63863155	64003462	0.0523824	-2.74232	0.0061007	Brain_Hippocampus
GPR132	14	105049395	105065445	0.0386502	-2.74146	0.00611667	Heart_Atrial_Appendage
URAD	13	27977717	27988693	0.0404261	2.741	0.00612531	Testis
TRAT1	3	108822770	108855005	0.0338971	-2.74044	0.00613565	Vagina
CEP164	11	117314557	117413266	0.196528	-2.73978	0.00614812	Heart_Atrial_Appendage
CCDC127	5	196868	218153	0.0647331	2.73968	0.00614992	Esophagus_Mucosa
LINC00500	4	138425523	138436869	0.0913662	2.73957	0.00615193	Brain_Hippocampus
SIRT1	10	67884656	67918390	0.0643977	2.73937	0.00615561	Brain_Spinal_cord_cervical_c-1
SEMA6C	1	151131685	151146631	0.313628	-2.73935	0.00615617	Heart_Atrial_Appendage
STK24-AS1	13	98577244	98578830	0.0589555	-2.73861	0.00616991	Small_Intestine_Terminal_Ileum
IDUA	4	986997	1004564	0.019715	2.738	0.00618147	Testis
CYBRD1	2	171522247	171558129	0.0222304	-2.73777	0.0061858	Testis
ATCAY	19	3879864	3928082	0.100744	2.73772	0.00618658	Vagina
CACNB3	12	48813794	48828941	0.0526647	2.73766	0.00618784	Brain_Frontal_Cortex_BA9
CPNE7	16	89575758	89597246	0.0803648	-2.73738	0.0061931	Ovary
SLFN12L	17	35464249	35537678	0.0834906	-2.7373	0.00619465	Cells_EBV-transformed_lymphocytes
VWDE	7	12330885	12403941	0.0467012	-2.73725	0.00619549	Pituitary
LIX1L-AS1	1	145926590	145959179	0.129124	2.73689	0.00620233	Pancreas
MLN	6	33794673	33804003	0.462393	-2.73624	0.00621457	Small_Intestine_Terminal_Ileum
TMEM14A	6	52671113	52686588	0.0390403	2.73621	0.00621521	Esophagus_Mucosa
MVB12B	9	126326829	126507041	0.0691637	-2.73531	0.00623218	Pituitary
HCFC1R1	16	3022625	3024286	0.112108	-2.73523	0.0062337	Brain_Frontal_Cortex_BA9
SPG21	15	64963022	64990310	0.0297909	2.73447	0.00624802	Kidney_Cortex
DTX3	12	57604622	57609804	0.0358603	2.73444	0.00624857	Brain_Putamen_basal_ganglia
KCNC1	11	17734774	17856804	0.104273	-2.73281	0.00627965	Small_Intestine_Terminal_Ileum
BORCS6	17	8188345	8190180	0.025124	-2.73231	0.00628915	Artery_Aorta
NECTIN4	1	161070998	161089558	0.0789745	2.73215	0.00629222	Nerve_Tibial
FBXO32	8	123497889	123541206	0.0235041	-2.732	0.00629515	Brain_Caudate_basal_ganglia
C16orf46	16	81053497	81077267	0.0201618	2.73192	0.00629669	Cells_Cultured_fibroblasts
TRIM72	16	31214119	31231537	0.0692094	2.73163	0.00630226	Heart_Left_Ventricle
ZNF565	19	36182276	36246257	0.0577792	2.73161	0.00630263	Brain_Cerebellum
DCSTAMP	8	104339087	104356689	0.0181676	-2.73158	0.00630317	Brain_Hypothalamus
PTPN13	4	86594315	86815171	0.124555	2.73051	0.00632374	Pituitary
PSORS1C1	6	31114750	31140092	0.0812345	2.73043	0.00632527	Minor_Salivary_Gland
UROD	1	45010950	45015575	0.0198892	-2.73014	0.00633079	Adipose_Visceral_Omentum
GET3	19	12737139	12748323	0.506051	-2.73012	0.00633109	Heart_Atrial_Appendage
C9orf24	9	34379019	34397828	0.231319	-2.72998	0.0063338	Testis
LMBRD1	6	69672757	69867236	0.016385	-2.7299	0.00633531	Brain_Substantia_nigra
PACSIN1	6	34466061	34535229	0.0648595	-2.72989	0.00633553	Brain_Cerebellum
SLC6A3	5	1392794	1445440	0.0897713	2.72974	0.00633851	Uterus
ALPK3	15	84817356	84873479	0.0241235	2.72959	0.00634139	Testis
KCNK7	11	65592836	65595996	0.110219	-2.72957	0.00634176	Nerve_Tibial
ITGB5	3	124761948	124901418	0.0312595	2.72906	0.00635157	Esophagus_Muscularis
SMARCD2	17	63832081	63843065	0.0167292	-2.72876	0.00635738	Colon_Sigmoid
ORMDL3	17	39921041	39927601	0.295335	2.7286	0.00636029	Spleen
PLEKHF1	19	29665459	29675477	0.0458777	-2.72848	0.00636276	Cells_Cultured_fibroblasts
VEGFC	4	176683538	176792922	0.429503	2.72839	0.00636445	Thyroid
TSEN54	17	75515944	75524735	0.0108587	-2.72821	0.00636789	Liver
PARP1	1	226360210	226408154	0.0690064	2.7276	0.00637963	Skin_Sun_Exposed_Lower_leg
ABCC4	13	95019835	95301475	0.043824	2.72726	0.00638633	Testis
GDF5OS	20	35433029	35435450	0.0742937	2.7272	0.00638738	Testis
DCTD	4	182890060	182917936	0.0410602	2.72685	0.00639425	Vagina
DHX32	10	125836337	125896436	0.0313258	-2.72663	0.00639855	Breast_Mammary_Tissue
BRD7	16	50313487	50368988	0.0807796	-2.72657	0.00639968	Liver
PKD1L3	16	71929538	72000402	0.165504	2.72656	0.00639989	Artery_Aorta
SELENON	1	25800193	25818221	0.0585946	-2.72615	0.00640785	Small_Intestine_Terminal_Ileum
HOXD3	2	176136612	176173102	0.0773078	-2.72556	0.00641916	Adrenal_Gland
IGFBP4	17	40443450	40457725	0.0432749	-2.72532	0.00642384	Esophagus_Mucosa
SLC7A11	4	138164097	138242349	0.0738628	-2.7242	0.0064458	Brain_Cortex
SLC13A5	17	6684719	6713377	0.0154221	2.72403	0.00644907	Skin_Sun_Exposed_Lower_leg
FAM131B	7	143353400	143362770	0.0599097	2.72382	0.00645309	Cells_Cultured_fibroblasts
GTPBP3	19	17334920	17342731	0.0279958	2.72236	0.00648169	Brain_Putamen_basal_ganglia
FBXL16	16	692498	705801	0.0500935	2.72212	0.0064864	Liver
RNASEH2B	13	50909747	51024120	0.105984	-2.72203	0.00648815	Skin_Not_Sun_Exposed_Suprapubic
DXO	6	31969810	31972290	0.0607871	-2.72201	0.00648865	Brain_Cortex
LINC00667	18	5237826	5290608	0.271826	2.72172	0.00649427	Brain_Hypothalamus
DNAJC2	7	103312289	103344830	0.0613173	2.72151	0.00649844	Artery_Coronary
ABHD12B	14	50872053	50904970	0.294973	2.72103	0.00650782	Thyroid
ST6GALNAC2	17	76565377	76586956	0.0309517	2.72086	0.00651122	Skin_Not_Sun_Exposed_Suprapubic
C1QL1	17	44959693	44968303	0.0403936	-2.72085	0.00651145	Minor_Salivary_Gland
NPSR1	7	34658218	34878332	0.324268	-2.72081	0.00651224	Brain_Cerebellum
TGFBI	5	136028988	136063818	0.0605057	-2.72008	0.00652652	Whole_Blood
HOXA1	7	27092993	27096000	0.182287	-2.71965	0.00653517	Artery_Tibial
RNASE7	14	21042316	21044234	0.128816	-2.71949	0.00653827	Breast_Mammary_Tissue
LINC01804	2	15690782	15744339	0.0217348	2.71946	0.00653893	Testis
HOOK3	8	42896946	43030535	0.0176234	2.71913	0.00654536	Uterus
RNF34	12	121400083	121430623	0.0460138	-2.71885	0.006551	Brain_Substantia_nigra
ADRA1A	8	26748150	26867278	0.0580441	2.71829	0.006562	Adipose_Subcutaneous
B9D2	19	41354417	41364165	0.0643696	-2.71816	0.00656454	Esophagus_Mucosa
NFKB2	10	102394110	102402524	0.374174	-2.7181	0.00656576	Kidney_Cortex
GFM2	5	74721206	74767147	0.0166894	-2.71764	0.00657496	Colon_Sigmoid
CD69	12	9752486	9760901	0.0964905	-2.71749	0.006578	Adipose_Visceral_Omentum
LINC02716	11	45771416	45773295	0.0242459	2.71744	0.00657886	Testis
AMZ1	7	2679522	2775500	0.0136237	-2.71731	0.00658154	Cells_EBV-transformed_lymphocytes
NFYC-AS1	1	40690380	40692074	0.266311	-2.71723	0.006583	Skin_Not_Sun_Exposed_Suprapubic
ASAH1	8	18055992	18084998	0.0315229	2.71711	0.00658542	Esophagus_Mucosa
ENTPD1-AS1	10	95732976	96090250	0.0110428	-2.71684	0.00659092	Artery_Aorta
CELF5	19	3224661	3297076	0.288679	-2.71648	0.00659808	Lung
COL12A1	6	75084326	75206267	0.0289438	-2.71642	0.00659926	Brain_Cerebellar_Hemisphere
TSPAN32	11	2301997	2318204	0.053794	-2.7163	0.00660153	Heart_Atrial_Appendage
CCDC34	11	27330827	27363234	0.0487051	2.71623	0.00660294	Whole_Blood
JAK1	1	64833223	65067754	0.214302	2.71591	0.00660934	Thyroid
LY86-AS1	6	6346465	6622771	0.0155548	2.71577	0.00661217	Breast_Mammary_Tissue
JOSD1	22	38685543	38701556	0.136271	-2.71561	0.00661535	Colon_Sigmoid
TANGO2	22	20017014	20067164	0.0521825	2.71513	0.00662503	Artery_Tibial
ZNF451	6	57086844	57170305	0.0185384	2.71497	0.00662825	Ovary
TRIO	5	14143342	14532128	0.0292828	2.71489	0.00662977	Adipose_Subcutaneous
SLIRP	14	77708071	77761104	0.0342708	2.71416	0.00664435	Whole_Blood
STARD9	15	42575606	42720998	0.0215784	-2.71375	0.00665257	Brain_Amygdala
GFPT2	5	180300698	180353336	0.0225502	-2.71365	0.00665466	Heart_Atrial_Appendage
AGTR1	3	148697784	148743008	0.0361522	2.71319	0.00666382	Lung
STARD7	2	96184859	96208827	0.0182785	2.71275	0.00667269	Artery_Tibial
GATC	12	120446444	120463749	0.0584135	2.71264	0.00667503	Brain_Anterior_cingulate_cortex_BA24
CCDC97	19	41310172	41324873	0.0198313	-2.71244	0.006679	Adipose_Subcutaneous
FBP2	9	94558720	94593824	0.721877	-2.71205	0.00668678	Muscle_Skeletal
FFAR4	10	93566665	93604480	0.0598912	2.71193	0.00668921	Testis
NT5E	6	85449584	85495791	0.0945814	-2.71122	0.00670366	Spleen
HPSE2	10	98457077	99235862	0.0126375	2.71109	0.00670634	Brain_Amygdala
TTC12	11	113314579	113383544	0.178275	2.71078	0.00671261	Nerve_Tibial
FBL	19	39834458	39846379	0.0560937	-2.71035	0.00672117	Brain_Hypothalamus
LINC01234	12	113583886	113773726	0.61025	2.70992	0.00672996	Brain_Cerebellum
NUP210L	1	153992690	154155116	0.0929892	2.70973	0.0067338	Ovary
SAPCD2	9	137062127	137070557	0.0968823	-2.70963	0.00673576	Esophagus_Gastroesophageal_Junction
CPLX1	4	784957	826129	0.0975455	2.70952	0.00673798	Brain_Spinal_cord_cervical_c-1
HERPUD1	16	56932142	56944864	0.0166946	-2.70945	0.00673952	Muscle_Skeletal
ADRB1	10	114043866	114046904	0.0352941	2.70931	0.00674229	Heart_Atrial_Appendage
PTPRO	12	15322257	15602175	0.0186149	-2.70904	0.00674772	Adipose_Visceral_Omentum
CCNJL	5	160249083	160345396	0.0464843	2.709	0.00674857	Ovary
LY75	2	159803355	159904756	0.0686209	2.70892	0.00675033	Adrenal_Gland
TENT2	5	79612120	79688246	0.042283	2.70841	0.00676067	Whole_Blood
ATG16L2	11	72814406	72843674	0.21224	2.70787	0.00677158	Brain_Cerebellum
CHERP	19	16517894	16542437	0.0203794	2.70724	0.00678454	Testis
TMCC2	1	205227946	205285632	0.0815874	2.70689	0.00679161	Artery_Coronary
MLH1	3	36993226	37050896	0.0716084	2.70686	0.00679221	Esophagus_Mucosa
C1orf167	1	11761787	11789585	0.127729	2.70656	0.00679852	Ovary
OAF	11	120211032	120230334	0.0443074	2.70627	0.00680441	Nerve_Tibial
ASB1	2	238426742	238452250	0.155242	2.70608	0.00680825	Muscle_Skeletal
NFATC4	14	24365673	24379604	0.265995	-2.70539	0.0068224	Cells_Cultured_fibroblasts
FSD2	15	82755362	82806070	0.0788764	2.70437	0.00684338	Artery_Coronary
KBTBD13	15	65076746	65079948	0.0796916	2.7043	0.00684481	Artery_Tibial
PPP1R3C	10	91628442	91633071	0.0588178	-2.70406	0.00684972	Testis
HRH4	18	24460637	24479961	0.0149367	-2.70401	0.00685072	Artery_Tibial
NBEAL2	3	46979666	47009704	0.105287	2.7032	0.0068676	Cells_Cultured_fibroblasts
TMEM79	1	156282935	156293185	0.0110112	2.70298	0.00687202	Liver
CENPK	5	65517766	65563168	0.059341	2.70281	0.00687562	Stomach
DEPDC5	22	31753867	31908033	0.0209034	2.70273	0.00687733	Brain_Putamen_basal_ganglia
PLEKHO2	15	64841883	64868002	0.0300261	2.70272	0.00687752	Testis
UQCC2	6	33694293	33711727	0.0355643	2.70272	0.00687757	Adrenal_Gland
DNMT3B	20	32762385	32809359	0.0141268	-2.70247	0.00688264	Cells_Cultured_fibroblasts
FAM83B	6	54846771	54945099	0.137296	2.70244	0.00688325	Stomach
ADAMTS19	5	129460281	129738683	0.0367558	2.70228	0.00688667	Heart_Left_Ventricle
RFPL1	22	29438583	29442455	0.0185088	2.70224	0.0068873	Prostate
CACHD1	1	64470129	64693058	0.0102573	-2.7022	0.00688817	Brain_Substantia_nigra
PKN2	1	88684222	88836255	0.0992933	-2.70206	0.00689122	Spleen
CDSN	6	31115087	31120446	0.0478092	2.70204	0.00689158	Vagina
TRIM35	8	27284886	27311272	0.0508616	2.70182	0.00689605	Brain_Cerebellar_Hemisphere
EIF4H	7	74174231	74197122	0.0358054	-2.70175	0.00689746	Brain_Substantia_nigra
HADHA	2	26190635	26244672	0.176544	-2.70158	0.00690117	Adipose_Visceral_Omentum
STRA6	15	74179466	74212267	0.0404591	2.70151	0.00690263	Nerve_Tibial
TMEM9B	11	8947202	8965011	0.0121188	-2.70139	0.00690505	Brain_Nucleus_accumbens_basal_ganglia
FXR2	17	7591230	7614897	0.0334008	-2.70129	0.00690715	Stomach
SLC35C1	11	45804072	45813016	0.0454872	2.7011	0.00691106	Liver
MPPED2	11	30384493	30586872	0.0477504	-2.70088	0.00691564	Brain_Putamen_basal_ganglia
HTR2A	13	46831546	46897076	0.0435502	2.70069	0.00691958	Esophagus_Mucosa
NKD2	5	1008802	1038943	0.0965656	2.70029	0.00692784	Brain_Putamen_basal_ganglia
ABRACL	6	139028745	139043302	0.0412545	-2.70008	0.0069322	Pituitary
DDX23	12	48829756	48852842	0.0995444	-2.69947	0.006945	Esophagus_Muscularis
HTR1F	3	87792706	87993839	0.28337	-2.69944	0.0069456	Adipose_Visceral_Omentum
C3orf33	3	155762617	155806278	0.0138101	-2.69897	0.00695535	Esophagus_Mucosa
HNRNPA1L2	13	52642431	52643773	0.0703832	2.69896	0.00695565	Brain_Cerebellum
ELOA	1	23743448	23762059	0.0259805	-2.69847	0.00696594	Artery_Tibial
MDGA2	14	46840092	47675605	0.392872	2.69807	0.00697431	Brain_Nucleus_accumbens_basal_ganglia
FAM71B	5	157161846	157166264	0.0104185	2.69793	0.00697716	Testis
RRN3	16	15060033	15094311	0.0748376	-2.69787	0.00697837	Pancreas
COPS9	2	240126563	240136807	0.141159	2.69739	0.00698854	Breast_Mammary_Tissue
TWIST2	2	238848032	238910534	0.118101	-2.69738	0.00698864	Lung
ECM2	9	92493554	92536655	0.0320252	2.69737	0.00698888	Prostate
AMPD2	1	109616104	109632051	0.0153601	2.69737	0.00698902	Esophagus_Gastroesophageal_Junction
HCN1	5	45254948	45696498	0.0265424	2.69709	0.00699481	Heart_Atrial_Appendage
STC1	8	23841929	23854806	0.0319512	2.69705	0.00699564	Adipose_Subcutaneous
PRELID3B	20	59033145	59042809	0.064888	2.69701	0.00699653	Prostate
SAA1	11	18266260	18269977	0.0210011	-2.69678	0.00700131	Cells_Cultured_fibroblasts
CPN1	10	100042193	100081869	0.0590699	2.69625	0.00701258	Testis
ZNF140	12	133080474	133107526	0.144167	-2.69581	0.00702183	Brain_Cortex
LINC00578	3	177441910	177767379	0.158279	2.69576	0.00702273	Artery_Tibial
MDS2	1	23581495	23640568	0.0281485	-2.69565	0.00702521	Whole_Blood
GPR37L1	1	202122886	202133592	0.0307407	-2.69518	0.00703513	Kidney_Cortex
RDH13	19	55039108	55071291	0.0117193	-2.69514	0.00703586	Brain_Cortex
LINC01968	3	194708093	194826008	0.0821275	2.69507	0.00703749	Testis
CCL28	5	43376645	43412391	0.0704339	2.69501	0.00703875	Esophagus_Muscularis
ADAM28	8	24294069	24359014	0.23193	2.69493	0.0070403	Stomach
LINC01829	2	67123357	67397980	0.020981	2.69486	0.00704181	Esophagus_Gastroesophageal_Junction
DNAJC4	11	64230278	64234286	0.0551316	2.69447	0.00704997	Brain_Cerebellar_Hemisphere
PRSS53	16	31083437	31089628	0.0366726	2.6942	0.00705587	Liver
GSS	20	34928432	34956027	0.0901841	2.69391	0.00706193	Pituitary
DOC2A	16	30005514	30023270	0.419096	-2.69361	0.00706824	Adrenal_Gland
DAPK2	15	63907036	64072033	0.0282438	-2.69334	0.00707403	Adipose_Visceral_Omentum
TMEM171	5	73120569	73131809	0.113838	2.69332	0.00707442	Whole_Blood
HCRTR1	1	31617686	31632518	0.0266577	2.69299	0.00708147	Artery_Coronary
FLOT2	17	28879335	28897733	0.0474953	2.69277	0.00708612	Breast_Mammary_Tissue
SLC45A2	5	33944623	33984693	0.0742766	2.69214	0.00709962	Brain_Hippocampus
LINC01208	3	176415439	176867838	0.0380929	2.69198	0.007103	Colon_Sigmoid
AJUBA	14	22971177	22982551	0.0329444	-2.69178	0.00710722	Nerve_Tibial
TAPT1	4	16160505	16227410	0.0400282	-2.69163	0.00711039	Artery_Tibial
ARHGAP30	1	161046946	161069970	0.0402382	2.69122	0.00711912	Brain_Cerebellar_Hemisphere
FAM126A	7	22889371	23014130	0.132658	-2.69098	0.00712435	Brain_Hippocampus
MAP3K21	1	233327724	233385148	0.0626748	2.69097	0.00712455	Colon_Transverse
WRAP53	17	7686071	7703502	0.109118	-2.69052	0.007134	Colon_Transverse
KCNMA1	10	76869601	77638369	0.0462496	2.69029	0.00713909	Breast_Mammary_Tissue
CGNL1	15	57375967	57550717	0.0116432	2.6895	0.007156	Lung
C4BPA	1	207104233	207144972	0.0185636	-2.68925	0.00716119	Brain_Cerebellar_Hemisphere
CLIC4	1	24745382	24844321	0.0103458	-2.68911	0.00716438	Heart_Left_Ventricle
ADCY7	16	50246137	50318135	0.0540016	-2.68869	0.00717329	Whole_Blood
CCBE1	18	59430939	59697662	0.0821644	2.68837	0.00718017	Breast_Mammary_Tissue
ANKK1	11	113387779	113400416	0.190091	-2.68748	0.00719927	Heart_Left_Ventricle
LINC02082	3	168902194	168924590	0.0436736	-2.68707	0.00720826	Brain_Caudate_basal_ganglia
UBA5	3	132654446	132679794	0.166797	2.68701	0.00720942	Lung
DNAJC21	5	34929559	34958964	0.0666991	2.68697	0.00721031	Breast_Mammary_Tissue
ZFP30	19	37613749	37692337	0.0198825	2.68696	0.00721056	Cells_Cultured_fibroblasts
CLVS1	8	61057158	61501645	0.154328	2.68694	0.00721105	Skin_Not_Sun_Exposed_Suprapubic
DLX3	17	49990005	49995224	0.233655	2.68688	0.00721232	Adrenal_Gland
ELK4	1	205597556	205632011	0.0371801	2.68674	0.00721529	Cells_Cultured_fibroblasts
SUGP2	19	18990888	19034023	0.026971	2.68464	0.00726082	Skin_Not_Sun_Exposed_Suprapubic
HS6ST3	13	96090107	96839562	0.183966	-2.6846	0.00726164	Thyroid
LINC02139	16	85137150	85149443	0.019392	2.68435	0.00726713	Heart_Atrial_Appendage
LPCAT4	15	34358633	34367196	0.0902592	-2.68413	0.00727185	Brain_Cerebellar_Hemisphere
ZNF578	19	52453553	52516882	0.145146	2.68401	0.00727457	Brain_Hypothalamus
SLC27A6	5	128538013	129033642	0.0585215	2.68389	0.00727705	Prostate
LRRC14B	5	191495	196334	0.074097	-2.68378	0.00727945	Minor_Salivary_Gland
ZNF121	19	9560329	9584504	0.0673116	2.68369	0.00728149	Heart_Atrial_Appendage
LINC00499	4	138309613	138663403	0.0282402	2.68348	0.00728605	Testis
VPS54	2	63892146	64019428	0.0146789	2.68347	0.00728616	Adipose_Subcutaneous
SLC8A3	14	70044215	70189480	0.486958	-2.68334	0.00728909	Brain_Cerebellum
MAD1L1	7	1815793	2233243	0.056446	-2.68315	0.0072932	Skin_Not_Sun_Exposed_Suprapubic
SATB2	2	199269505	199471266	0.132688	2.68268	0.00730357	Artery_Aorta
CPS1	2	210477682	210679107	0.039418	-2.68257	0.00730597	Artery_Tibial
GLIS3-AS1	9	3898642	3901248	0.0205267	2.68213	0.00731542	Pituitary
TNNT1	19	55132698	55149206	0.281388	-2.68125	0.0073347	Brain_Nucleus_accumbens_basal_ganglia
ARMH1	1	44674692	44725591	0.0584741	-2.6807	0.00734678	Whole_Blood
IFNE	9	21480839	21482313	0.040428	-2.68052	0.00735088	Pituitary
CELF2	10	10798397	11336675	0.0169574	-2.68047	0.00735198	Adipose_Subcutaneous
POLH-AS1	6	43588230	43591362	0.0418797	2.68012	0.00735963	Artery_Coronary
LINC02269	4	173699082	174001488	0.051397	2.6797	0.00736893	Prostate
PSORS1C2	6	31137534	31139066	0.0427443	2.67951	0.00737301	Adrenal_Gland
SLC26A8	6	35943516	36024868	0.0378307	2.67923	0.00737908	Brain_Hippocampus
DIO2	14	80197526	80387757	0.489758	-2.67894	0.00738545	Esophagus_Mucosa
SAPCD1	6	31762656	31764850	0.251969	2.67894	0.00738556	Nerve_Tibial
CEP135	4	55948871	56033361	0.0336621	2.67881	0.00738852	Ovary
LINC01376	2	18986451	19348067	0.0274517	2.6785	0.0073952	Liver
ZNF730	19	23075210	23147221	0.0579643	-2.67844	0.00739657	Prostate
PRG4	1	186296279	186314567	0.136331	2.67841	0.00739729	Brain_Cerebellar_Hemisphere
ECE1	1	21217247	21345572	0.0206903	2.67837	0.00739808	Colon_Transverse
S100A3	1	153547329	153549258	0.0348999	-2.67836	0.0073983	Brain_Cerebellum
FXYD6	11	117836976	117877486	0.0112587	-2.67822	0.00740136	Testis
RNASEH2A	19	12806584	12813640	0.0650056	2.678	0.00740628	Brain_Cerebellum
NDUFAB1	16	23581014	23596316	0.0393291	2.67798	0.00740673	Brain_Putamen_basal_ganglia
SRRM5	19	43596617	43614498	0.0276004	2.67767	0.0074136	Brain_Cerebellum
PLA2G7	6	46704201	46735693	0.0235078	2.6776	0.0074151	Lung
GSG1	12	13083532	13103683	0.0447152	-2.67756	0.00741596	Small_Intestine_Terminal_Ileum
MAP3K14-AS1	17	45247916	45269824	0.021276	-2.67756	0.00741608	Brain_Spinal_cord_cervical_c-1
YPEL3	16	30092314	30096915	0.0398697	2.67744	0.00741868	Colon_Transverse
ZC3H14	14	88562970	88627596	0.0398222	2.67601	0.00745045	Adipose_Visceral_Omentum
PARD6G	18	80157232	80247514	0.375492	-2.67559	0.00745975	Lung
ALAD	9	113386312	113401290	0.0161628	2.67537	0.00746473	Pancreas
HSPB2	11	111912734	111914093	0.0237268	2.67466	0.0074805	Artery_Tibial
LINC01703	1	226083590	226090465	0.0256198	2.67437	0.00748689	Pituitary
ELOVL6	4	110045846	110199199	0.0199438	-2.67427	0.00748926	Stomach
MTRF1	13	41216369	41263577	0.0552945	-2.67416	0.00749174	Spleen
BCAM	19	44809071	44821421	0.0182698	-2.67401	0.00749496	Liver
ZNF367	9	96385941	96418370	0.0685342	2.67401	0.00749508	Heart_Atrial_Appendage
ADAMTS5	21	26917922	26967088	0.0344845	-2.67333	0.00751018	Pancreas
CYP26A1	10	93073475	93077885	0.0634067	2.67321	0.007513	Brain_Substantia_nigra
PCOLCE2	3	142815922	142889206	0.0132004	2.6732	0.00751316	Whole_Blood
RPAIN	17	5419641	5432877	0.0365182	-2.67311	0.00751511	Artery_Coronary
RBBP9	20	18486540	18497225	0.0117762	-2.673	0.00751761	Nerve_Tibial
EFCAB6-AS1	22	43516107	43560063	0.0348868	2.67266	0.00752528	Thyroid
CCDC28A	6	138773769	138793319	0.136029	-2.67263	0.00752582	Esophagus_Mucosa
RAPGEFL1	17	40177010	40195656	0.0382294	-2.67242	0.00753055	Brain_Nucleus_accumbens_basal_ganglia
CACNA2D2	3	50362613	50504244	0.0159889	2.67221	0.00753534	Adipose_Subcutaneous
ADAMTS4	1	161184302	161199054	0.0326916	-2.67207	0.00753842	Prostate
LRAT	4	154626945	154753120	0.0105388	2.67158	0.00754959	Artery_Aorta
LINC02224	5	44495099	44658569	0.0260157	2.67151	0.00755116	Brain_Hippocampus
KRTAP5-7	11	71527267	71528669	0.0650248	2.67107	0.00756093	Skin_Sun_Exposed_Lower_leg
ZSCAN30	18	35251058	35290245	0.0442437	-2.6704	0.00757618	Small_Intestine_Terminal_Ileum
CEP95	17	64506865	64542461	0.0142205	2.67004	0.00758425	Colon_Sigmoid
RAPGEF4	2	172735274	173052893	0.11231	2.66993	0.00758663	Liver
SHISA3	4	42397488	42402487	0.0473755	2.66961	0.00759402	Brain_Cerebellum
TWF1	12	43793723	43806328	0.0272217	-2.66923	0.00760262	Adipose_Visceral_Omentum
MYEOV	11	69294151	69341682	0.0728102	-2.66922	0.00760268	Spleen
PRG2	11	57386780	57390650	0.0116481	-2.66921	0.007603	Ovary
FRAT1	10	97319271	97321915	0.0456305	-2.66892	0.00760958	Skin_Sun_Exposed_Lower_leg
ZFP64	20	52051663	52204308	0.143839	2.66887	0.00761058	Small_Intestine_Terminal_Ileum
SLC5A1	22	32043261	32113029	0.0525793	-2.66844	0.00762044	Thyroid
NUDT7	16	77722492	77742260	0.086081	2.66842	0.0076209	Brain_Anterior_cingulate_cortex_BA24
MAP4K2	11	64784918	64803241	0.0431487	2.66814	0.0076272	Brain_Cerebellum
PROSER3	19	35758143	35771166	0.197554	-2.66796	0.00763127	Artery_Coronary
GATD1	11	767220	777488	0.0329897	2.66766	0.00763809	Adrenal_Gland
IGFLR1	19	35738801	35742453	0.167948	-2.6676	0.0076395	Pancreas
EIF6	20	35278907	35284985	0.237627	2.66703	0.00765258	Lung
HLA-DMB	6	32934629	32941028	0.0418798	-2.66693	0.00765471	Adipose_Visceral_Omentum
CIAO1	2	96266159	96274173	0.0893264	2.66651	0.00766435	Brain_Amygdala
NR1H2	19	50329653	50383388	0.0103412	-2.66605	0.00767488	Cells_Cultured_fibroblasts
OSBP2	22	30693782	30907824	0.0861628	2.66588	0.00767879	Adipose_Visceral_Omentum
HMGN4	6	26538366	26546933	0.0217703	-2.66579	0.00768074	Ovary
P2RX3	11	57338352	57372396	0.0171079	2.66522	0.00769384	Colon_Sigmoid
CSPG5	3	47562238	47580792	0.0256479	-2.66515	0.00769543	Breast_Mammary_Tissue
PANX3	11	124611428	124620356	0.0599049	-2.66493	0.00770055	Brain_Caudate_basal_ganglia
ATP1B3	3	141876124	141926549	0.0124628	-2.66484	0.00770253	Cells_Cultured_fibroblasts
DCTPP1	16	30423615	30430030	0.0290097	-2.66457	0.00770865	Heart_Left_Ventricle
VPS41	7	38722974	38932394	0.119089	2.6642	0.00771723	Pancreas
IFT46	11	118544528	118572970	0.0515715	2.66389	0.00772419	Brain_Cerebellar_Hemisphere
AP2A2	11	924881	1012245	0.16289	-2.66386	0.00772508	Stomach
ACTR1B	2	97655939	97664044	0.468797	2.66373	0.00772789	Spleen
SLC23A3	2	219161465	219170095	0.0490838	2.66369	0.0077288	Nerve_Tibial
FSHR	2	48962157	49154527	0.400894	2.66325	0.00773891	Heart_Atrial_Appendage
RPP40	6	4994717	5004063	0.152354	-2.66324	0.00773911	Ovary
AKT3	1	243488233	243851079	0.0154018	-2.66316	0.007741	Small_Intestine_Terminal_Ileum
VAMP3	1	7771296	7781432	0.0259332	2.66298	0.00774511	Muscle_Skeletal
NUCB1	19	48900050	48923473	0.0260335	2.66291	0.00774678	Esophagus_Mucosa
ASL	7	66075800	66094697	0.13452	-2.66226	0.00776183	Pancreas
SH3BP5	3	15254353	15341368	0.229947	2.66214	0.00776452	Liver
CHRNA4	20	63343223	63378401	0.0517949	-2.66154	0.00777838	Thyroid
SERPINA4	14	94561442	94569913	0.024576	2.66149	0.00777947	Stomach
ARID3A	19	925781	975939	0.0500842	2.66147	0.0077801	Brain_Spinal_cord_cervical_c-1
NME4	16	396725	410367	0.0976655	-2.6614	0.00778156	Artery_Tibial
ITPR2	12	26335352	26833194	0.0529396	2.66085	0.00779447	Brain_Cerebellum
PSMD9	12	121888732	121918297	0.434344	2.66045	0.00780358	Heart_Atrial_Appendage
AJM1	9	136842478	136848801	0.604992	-2.66027	0.00780778	Small_Intestine_Terminal_Ileum
LGI3	8	22146830	22157084	0.0294735	-2.65976	0.00781969	Lung
MICAL3	22	17787649	18024561	0.0847409	2.65954	0.00782474	Muscle_Skeletal
LINC00896	22	20206380	20208524	0.0141177	-2.65917	0.0078334	Thyroid
C5AR1	19	47290023	47322066	0.010633	2.65914	0.00783402	Colon_Sigmoid
ARPC1B	7	99374249	99394816	0.109666	-2.65894	0.00783881	Thyroid
HMBOX1	8	28890395	29064764	0.0823299	-2.65886	0.00784053	Artery_Aorta
TMBIM4	12	66135846	66170027	0.238968	-2.65813	0.00785766	Brain_Cerebellum
SLC9A1	1	27098809	27166981	0.0252539	-2.6579	0.00786292	Ovary
DPM1	20	50934867	50959140	0.199346	2.65788	0.0078634	Brain_Cortex
LINC00921	16	3263743	3269151	0.0388616	2.6575	0.00787227	Liver
EIF1	17	41688885	41692668	0.0251083	2.65737	0.00787522	Nerve_Tibial
MIR31HG	9	21380073	21559891	0.034537	-2.65735	0.00787571	Brain_Anterior_cingulate_cortex_BA24
GALNT18	11	11270877	11622005	0.0180907	-2.65721	0.00787903	Heart_Left_Ventricle
LIN7A	12	80792520	80937934	0.078334	-2.6568	0.00788866	Heart_Atrial_Appendage
KLF9	9	70384604	70414657	0.13558	-2.65648	0.00789604	Adipose_Visceral_Omentum
WDR59	16	74871362	75000173	0.0156761	2.65523	0.00792544	Brain_Caudate_basal_ganglia
FAM222B	17	28755980	28855232	0.0222817	2.65516	0.00792712	Thyroid
COX7A2	6	75237675	75250323	0.0253556	-2.65513	0.00792768	Whole_Blood
MRPS5	2	95085369	95122006	0.0197518	2.65454	0.00794156	Liver
RAB43	3	129087569	129122801	0.0149147	2.6543	0.00794736	Kidney_Cortex
PRKDC	8	47773111	47960178	0.0492225	2.6537	0.00796151	Colon_Sigmoid
C1QTNF6	22	37180166	37199385	0.2106	2.65359	0.00796412	Adrenal_Gland
SSR3	3	156539553	156555149	0.0124301	-2.65346	0.00796718	Brain_Hippocampus
CMKLR1	12	108288044	108339317	0.156588	-2.65333	0.00797009	Skin_Sun_Exposed_Lower_leg
C8orf37	8	95244913	95269201	0.0982642	-2.65304	0.00797707	Pituitary
F5	1	169511951	169586588	0.0146484	2.65303	0.00797725	Brain_Frontal_Cortex_BA9
SPATA13	13	23979805	24307074	0.0577645	-2.65287	0.00798106	Spleen
MMP27	11	102691487	102705769	0.158797	-2.65254	0.00798875	Spleen
ZNF557	19	7069703	7087968	0.024329	-2.6515	0.00801342	Artery_Aorta
TFB1M	6	155256134	155314493	0.0526807	-2.65143	0.00801517	Brain_Caudate_basal_ganglia
ESYT2	7	158730995	158830253	0.0110266	-2.6513	0.00801823	Stomach
DNAH14	1	224896262	225399292	0.0867766	-2.65103	0.00802471	Liver
CD274	9	5450503	5470566	0.0981688	-2.65097	0.00802599	Whole_Blood
TOMM34	20	44942130	44960397	0.0236817	2.65036	0.0080407	Stomach
CTSL	9	87724051	87731469	0.150997	-2.65002	0.0080487	Whole_Blood
GJB3	1	34781214	34786369	0.204459	2.64954	0.0080601	Pancreas
C12orf75	12	105235290	105396097	0.0318468	2.64951	0.00806088	Muscle_Skeletal
ASCC1	10	72096032	72217134	0.0398284	-2.64926	0.00806689	Muscle_Skeletal
MMP24	20	35226690	35276998	0.0289795	2.64914	0.00806966	Brain_Cerebellum
FAM161A	2	61824848	61854143	0.0120208	2.64879	0.00807813	Stomach
RNF170	8	42849637	42897290	0.139099	-2.64787	0.00809996	Thyroid
MBOAT2	2	8852690	9003709	0.0730186	2.64749	0.00810922	Cells_EBV-transformed_lymphocytes
ZBTB11	3	101648889	101677135	0.0562356	-2.64728	0.00811418	Artery_Tibial
TM9SF3	10	96518110	96587452	0.0574984	-2.64719	0.00811638	Prostate
AKAP3	12	4615508	4649051	0.0286837	2.64713	0.00811771	Brain_Cerebellar_Hemisphere
GRIN3A	9	101569352	101738647	0.0254851	2.64708	0.00811904	Spleen
ARMH3	10	101845599	102056193	0.347731	-2.64641	0.00813521	Brain_Amygdala
SDC3	1	30869466	30908758	0.11229	-2.64624	0.00813919	Brain_Hypothalamus
[truncated: 18,441 more rows]
