# Supplementary material for: Large-scale association analysis identified novel differentiated thyroid carcinoma risk loci by integrating transcriptome and proteome
Source: Research Square preprint supplement (doi:10.21203/rs.3.rs-6751995/v1), 2025-07-18
Supplement: Supplementary file 2 [file 345e4f429e9727014985d119.xlsx]

## Sheet: Contents
	Contents
	Supplementary Table 1	Genome-wide association study analysis result that are identified across all studies
	Supplementary Table 2	Transcriptome-wide association study results using thyroid-relevant tissues from GTEx including thyroid, whole blood, pituatary, and brain hypothalamus
	Supplementary Table 3	Result of Baysian colocalization analysis of transcriptome (eQTLs) with differentiated thyroid carcinoma (DTC)
	Supplementary Table 4	FOCUS fine mapping analysis results of DTC identified genes across 49 tissues
	Supplementary Table 5	Results of transcriptome-wide association study (TWAS) using all 49 available tissues from GTEx
	Supplementary Table 6	Results of transcriptome-wide association study (TWAS) using thyroid cancer tissue from TCGA databse
	Supplementary Table 7	Results of brain and plasma blood proteome-wide association study (PWAS) using ROSMAP and AIRC study
	Supplementary Table 8	Result of Baysian colocalization analysis of proteome (pQTL) with differentiated thyroid carcinoma (DTC)
	Supplementary Table 9	Gene Set Enrichment Analysis of pathways and biological processes associated with identified genes from GWAS, TWAS and PWAS
	Supplementary Table 10	Effect estimates used in the PRS model in the study group EPIC and EPITYHR
	Supplementary Table 11	Comparison of MR casual estimates between MVMR and IVW (different clumping thresholds)

## Sheet: S10
Supplementary Table 10. Effect estimates used in the PRS model in the study group EPIC and EPITYHR
Chromosome position with reference to build 38, the effect allelse (EA) and the other allele (OA), the effect allele frequency (EAF) for each study group, and Odds Ratio (OR) used to calculate the polygenic risk score.
aOR from the meta analysis after excluding results for the EPIC study group
bOR from the meta analysis after excluding results for the EPITHYR study group
						aEPIC		bEPITHYR
	SNP	locus	position	EA	OA	EAF	OR	EAF	OR
SNP10	rs12129938	1q42.2	233276815	A	G	0.782924	1.20897	0.782858	1.21671
	rs11693806	2q35	217427435	C	G	0.289161	1.40046	0.289138	1.39632
	rs6793295	3q26.2	169800667	T	C	0.734062	1.16915	0.733991	1.18155
	rs73227498	5q22.1	112150207	A	T	0.864843	1.32824	0.864796	1.32162
	rs2466076	8p12	32575278	G	T	0.497465	1.28015	0.497481	1.27666
	rs1588635	9q22.33	97775520	A	C	0.356195	1.6637	0.356104	1.66205
	rs7902587	10q24.33	103934543	T	C	0.096264	1.27939	0.096207	1.26656
	rs368187	14q13.3	36063370	G	C	0.572895	1.3353	0.572865	1.31229
	rs116909374	14q13.3	36269155	T	C	0.037145	1.67896	0.037133	1.62435
	rs2289261	15q22.33	67165147	C	G	0.637084	1.17675	0.637078	1.19631
SNP25	rs1342586	1q41	218424517	C	T	0.778416	1.21711	0.778431	1.21288
	rs1650149	10q22.3	77924587	A	G	0.7081	1.1456	0.708068	1.15684
	rs2451668	1q43	243322950	T	C	0.449994	1.1571	0.449929	1.17126
	rs334723	1p31.3	61166357	G	A	0.042117	1.33067	0.042098	1.29949
	rs4804416	19p13.2	7223837	T	G	0.585813	1.12576	0.585825	1.13248
	rs56110108	5q31.1	134557286	T	A	0.905206	1.32528	0.905298	1.22679
	rs59831429	16q22.2	72721676	T	C	0.937812	1.27449	0.937792	1.25961
	rs6697791	1q42.2	233276132	C	T	0.796197	1.21624	0.796146	1.22285
	rs73227498	5q22.1	112150207	A	T	0.864843	1.32824	0.864796	1.32162
	rs7847663	9p22.33	97782586	C	T	0.35644	1.65933	0.356352	1.65758
	rs9419958	10q24.33	103916188	T	C	0.130755	1.25052	0.130637	1.24675
	rs9868000	3q26.2	169793001	G	A	0.734546	1.17031	0.734477	1.18242
	rs11645076	16q23.2	79678658	T	C	0.334854	1.17201	0.334834	1.16315
	rs12318900	12q14.3	65650504	A	G	0.02982	1.34942	0.029801	1.37439
	rs1326141	6p21.1	43935540	A	G	0.235383	1.17114	0.235413	1.19085
	rs13287517	9p22.1	19064131	C	G	0.379384	1.13674	0.3793	1.13728
	rs17293632	15q22.33	67150258	T	C	0.249827	1.229	0.249861	1.23977
	rs2299903	7q31.33	124757288	G	A	0.383748	1.11505	0.383759	1.1249
	rs4733128	8p12	32549084	T	C	0.493692	1.29633	0.493705	1.29211
	rs56400346	14q13.3	36114681	A	G	0.605362	1.32206	0.605354	1.30871
	rs57481445	2q35	217431651	G	A	0.286089	1.40094	0.286094	1.39713
	rs62019923	15q15.1	40672837	T	C	0.842691	1.17925	0.842673	1.15291
	rs7734992	5p15.33	1280013	C	T	0.439785	1.17526	0.439878	1.17159
	rs79676842	8q24.22	132871660	T	G	0.024732	1.4333	0.024741	1.35274
	rs8105767	19p12	22032639	G	A	0.299358	1.1585	0.299367	1.13658
