# Supplementary material for: Large-scale association analysis identified novel differentiated thyroid carcinoma risk loci by integrating transcriptome and proteome
Source: Research Square preprint supplement (doi:10.21203/rs.3.rs-6751995/v1), 2025-07-18
Supplement: Supplementary file 3 [file 65421855cdab0f5a06b5a135.xlsx]

## Sheet: Contents
	Contents
	Supplementary Table 1	Genome-wide association study analysis result that are identified across all studies
	Supplementary Table 2	Transcriptome-wide association study results using thyroid-relevant tissues from GTEx including thyroid, whole blood, pituatary, and brain hypothalamus
	Supplementary Table 3	Result of Baysian colocalization analysis of transcriptome (eQTLs) with differentiated thyroid carcinoma (DTC)
	Supplementary Table 4	FOCUS fine mapping analysis results of DTC identified genes across 49 tissues
	Supplementary Table 5	Results of transcriptome-wide association study (TWAS) using all 49 available tissues from GTEx
	Supplementary Table 6	Results of transcriptome-wide association study (TWAS) using thyroid cancer tissue from TCGA databse
	Supplementary Table 7	Results of brain and plasma blood proteome-wide association study (PWAS) using ROSMAP and AIRC study
	Supplementary Table 8	Result of Baysian colocalization analysis of proteome (pQTL) with differentiated thyroid carcinoma (DTC)
	Supplementary Table 9	Gene Set Enrichment Analysis of pathways and biological processes associated with identified genes from GWAS, TWAS and PWAS
	Supplementary Table 10	Effect estimates used in the PRS model in the study group EPIC and EPITYHR
	Supplementary Table 11	Comparison of MR casual estimates between MVMR and IVW (different clumping thresholds)

## Sheet: S8
Supplementary Table 8. Result of Baysian colocalization analysis of proteome (pQTL) with differentiated thyroid carcinoma (DTC)
PP0: no association
PP1: causal variant for GWAS only
PP2: causal variant for eQTL or pQTL only
PP3: two independent causal variants
PP4: a shared causal variants
			Proteome
locus	Gene	Proteome	PP0	PP1	PP2	PP3	PP4
1p36.22	MTHFR	Brain	2.01e-13	2.74e-14	0.0939	0.0119	0.894
9q22.33	NANS	Brain	9.64e-33	6.42e-14	1.5e-19	1	5.81e-13
11q22.3	KDELC2	Plasma	1.75e-15	9.98e-14	0.000715	0.0398	0.96
14q22.2	SAMD4A	Brain	1.34e-10	5.73e-11	0.00698	0.002	0.991
15q15.1	EIF2AK4	Brain	0.0573	0.0279	0.406	0.198	0.311
	RMDN3	Brain	1e-06	0.000154	0.000124	0.0181	0.982
20p12.2	JAG1	Plasma	0.594	0.0552	0.207	0.0191	0.125
