# Supplementary material for: Large-scale association analysis identified novel differentiated thyroid carcinoma risk loci by integrating transcriptome and proteome
Source: Research Square preprint supplement (doi:10.21203/rs.3.rs-6751995/v1), 2025-07-18
Supplement: Supplementary file 4 [file 670fde3e2323634337ff2abd.xlsx]

## Sheet: Contents
	Contents
	Supplementary Table 1	Genome-wide association study analysis result that are identified across all studies
	Supplementary Table 2	Transcriptome-wide association study results using thyroid-relevant tissues from GTEx including thyroid, whole blood, pituatary, and brain hypothalamus
	Supplementary Table 3	Result of Baysian colocalization analysis of transcriptome (eQTLs) with differentiated thyroid carcinoma (DTC)
	Supplementary Table 4	FOCUS fine mapping analysis results of DTC identified genes across 49 tissues
	Supplementary Table 5	Results of transcriptome-wide association study (TWAS) using all 49 available tissues from GTEx
	Supplementary Table 6	Results of transcriptome-wide association study (TWAS) using thyroid cancer tissue from TCGA databse
	Supplementary Table 7	Results of brain and plasma blood proteome-wide association study (PWAS) using ROSMAP and AIRC study
	Supplementary Table 8	Result of Baysian colocalization analysis of proteome (pQTL) with differentiated thyroid carcinoma (DTC)
	Supplementary Table 9	Gene Set Enrichment Analysis of pathways and biological processes associated with identified genes from GWAS, TWAS and PWAS
	Supplementary Table 10	Effect estimates used in the PRS model in the study group EPIC and EPITYHR
	Supplementary Table 11	Comparison of MR casual estimates between MVMR and IVW (different clumping thresholds)

## Sheet: S7
Supplementary Table 7. Results of brain and plasma blood proteome-wide association study (PWAS) using ROSMAP and AIRC study
R2: A cross-validated R2 of tissue model's correlation to gene's measured transcriptome (prediction performance)
FDR: False discovery rate
Gene	chromosome	start_position	end_position	R2	PWAS.Z	PWAS.P	FDR	source
NANS	9	100819021	100845357	0.34433	5.969	2.39e-09	6.6442e-06	Brain
MTHFR	1	11845780	11866977	0.271	-4.87049	1.11e-06	0.0015429	Brain
SAMD4A	14	55033815	55260033	0.352877	4.36497	1.27e-05	0.0117687	Brain
KDELC2	11	108472112	108498384	0.109415	-4.1802	2.91e-05	0.0166244	Plasma blood
JAG1	20	10637684	10673999	0.003641	4.17424	2.99e-05	0.0166244	Plasma blood
EIF2AK4	15	40226347	40327797	0.08861	3.8782	0.000105	0.04726	Brain
RMDN3	15	41028082	41048049	0.21545	3.8476	0.000119	0.04726	Brain
MKRN2	3	12598513	12625212	0.068647	-3.73196	0.00019	0.066025	Brain
ADAL	15	43622872	43646096	0.04139	-3.6947	0.00022	0.0679556	Brain
ERLIN1	10	101909851	101948091	0.289	3.59139	0.000329	0.091462	Brain
STAMBP	2	74056086	74100786	0.0706	3.54946	0.000386	0.0975527	Brain
CWF19L1	10	101992055	102027437	0.199	-3.52154	0.000429	0.0992246	Brain
AAGAB	15	67493371	67547533	0.02888	3.5009	0.000464	0.0992246	Brain
PLCL1	2	198669426	199437305	0.0392	3.43216	0.000599	0.112312	Brain
SGSH	17	78180515	78194722	-0.003459	-3.4291	0.000606	0.112312	Brain
RIC8A	11	207511	215113	0.0475	3.4056	0.00066	0.114675	Brain
NUDCD2	5	162873532	162887146	0.044894	-3.3854	0.000711	0.116269	Brain
UNC5D	8	35235475	35796550	0.037601	3.2501	0.00115	0.177611	Plasma blood
MENT	1	151047751	151051986	-0.000135	3.1532	0.00161	0.22935	Plasma blood
CREB3L4	1	153967534	153974361	0.0409	3.1444	0.00166	0.22935	Plasma blood
NME4	16	396725	410367	0.01225	3.09986	0.00194	0.22935	Plasma blood
CFHR2	1	196943738	196959622	0.273	-3.081	0.00206	0.22935	Plasma blood
SLITRK6	13	85792790	85806683	0.04169	-3.0695	0.00214	0.22935	Plasma blood
FAM151A	1	54609181	54623556	0.0408	3.0613	0.0022	0.22935	Plasma blood
PMEL	12	55954105	55973317	0.027629	-3.0557	0.00225	0.22935	Plasma blood
FAM177A1	14	35514113	35582336	0.008274	3.05379	0.00226	0.22935	Brain
ANKMY2	7	16639401	16685442	0.185	3.0532	0.00226	0.22935	Brain
DLL4	15	40929340	40939073	0.00515	3.0474	0.00231	0.22935	Plasma blood
TPST2	22	26521996	26596717	0.033861	3.0275	0.00247	0.236779	Plasma blood
L3HYPDH	14	59927081	59951148	0.129049	2.97826	0.0029	0.268733	Brain
OVCA2	17	2042022	2043425	0.0545	2.9479	0.0032	0.286968	Plasma blood
LY75	2	159803355	159904756	0.36712	2.9022	0.00371	0.309071	Plasma blood
ZMPSTE24	1	40723779	40759856	0.137	2.89756	0.00376	0.309071	Brain
LGMN	14	92703807	92748679	0.019336	-2.8962	0.00378	0.309071	Plasma blood
UNC5B	10	71212570	71302864	0.011618	2.87644	0.00402	0.319303	Plasma blood
GSTA1	6	52791371	52803860	0.26096	2.85245	0.00434	0.324785	Plasma blood
SCP2	1	53392901	53517375	0.0376	2.84745	0.00441	0.324785	Brain
SLC25A12	2	172640880	172864766	0.0746	2.82957	0.004661	0.324785	Brain
GNPDA1	5	141371314	141392606	0.09302	-2.8231	0.004756	0.324785	Brain
FAM134A	2	220040947	220050201	0.103	-2.82105	0.004787	0.324785	Brain
EXOC6	10	94590935	94819250	0.0884	2.8208	0.00479	0.324785	Brain
VKORC1	16	31102163	31107301	0.04019	-2.80099	0.00509	0.33691	Brain
UAP1L1	9	139971953	139978991	0.24143	2.7803	0.00543	0.343709	Brain
TYRO3	15	41557675	41583589	0.026	2.78	0.00544	0.343709	Plasma blood
XYLB	3	38388251	38462839	0.004121	2.76261	0.00573	0.353769	Brain
PNP	14	20468954	20477089	0.127699	2.7543	0.00588	0.353769	Plasma blood
TMEM141	9	139685807	139687709	0.1215	-2.7469	0.00602	0.353769	Brain
PDPR	16	70147529	70195203	0.0336	2.73475	0.00624	0.353769	Brain
KIAA1161	9	34366668	34376851	0.26438	-2.7333	0.00627	0.353769	Brain
DCAKD	17	43100708	43138473	0.017086	2.7282	0.006368	0.353769	Brain
RCAN1	21	35885440	35987441	0.00386	2.722	0.00649	0.353769	Brain
TEFM	17	29224354	29233838	0.219924	-2.6791	0.007382	0.38249	Brain
RCSD1	1	167599330	167675486	0.127	2.67087	0.00757	0.38249	Brain
GGPS1	1	235490665	235507847	0.0234	2.66908	0.00761	0.38249	Brain
C3orf33	3	155480401	155524140	0.380079	2.66237	0.00776	0.38249	Brain
SERPINB8	18	61637159	61672278	0.107106	2.66	0.00782	0.38249	Brain
FLRT3	20	14322985	14337614	0.286093	2.65638	0.0079	0.38249	Plasma blood
TPPP3	16	67423712	67427438	0.04418	-2.65306	0.00798	0.38249	Brain
EHD4	15	42190950	42264776	0.07765	2.6328	0.008469	0.387028	Brain
ABHD10	3	111697857	111712210	0.216876	2.62791	0.00859	0.387028	Brain
MBLAC1	7	99724317	99726118	0.421	2.6272	0.00861	0.387028	Brain
DPP7	9	137110546	137115177	0.09399	-2.6166	0.00888	0.387028	Plasma blood
PLA2R1	2	159932006	160062615	0.27831	-2.616	0.0089	0.387028	Plasma blood
ASL	7	66075800	66094697	0.008948	-2.6153	0.00891	0.387028	Plasma blood
CD109	6	74405508	74538040	0.02114	-2.6099	0.00906	0.387489	Brain
PPOX	1	161136200	161147803	0.277	2.59373	0.00949	0.399158	Brain
ALCAM	3	105085753	105295744	0.063947	2.58903	0.00962	0.399158	Brain
DOC2A	16	30016830	30034591	0.08043	2.57365	0.01006	0.401556	Brain
USP8	15	50716577	50793280	0.00867	-2.5697	0.01018	0.401556	Brain
FAM114A2	5	153369688	153418496	0.15132	-2.5657	0.010296	0.401556	Brain
CD248	11	66314494	66317044	0.002212	2.5657	0.0103	0.401556	Plasma blood
GRN	17	44345246	44353106	0.0249	2.56325	0.0104	0.401556	Plasma blood
SAT2	17	7626234	7627876	0.00879	2.53486	0.0112	0.426521	Plasma blood
FTSJ3	17	61896793	61907372	0.119561	-2.512	0.012004	0.44979	Brain
ADAMTSL1	9	17906563	18910950	0.01414	-2.5034	0.0123	0.44979	Plasma blood
MECR	1	29519385	29557454	0.0974	-2.49734	0.0125	0.44979	Brain
ALAD	9	116148597	116163613	0.03243	2.4963	0.0125	0.44979	Brain
RHOT2	16	718086	724174	0.3415	-2.49443	0.01262	0.44979	Brain
XCL2	1	168540768	168543997	0.0154	-2.4873	0.01287	0.452894	Plasma blood
NRP2	2	206546714	206662857	0.0364	2.47507	0.013321	0.462905	Brain
TBL2	7	73567537	73578791	0.013668	-2.4608	0.01386	0.475689	Plasma blood
HYI	1	43916824	43919660	0.225	-2.45036	0.0143	0.481061	Brain
MLN	6	33794673	33804003	0.06443	-2.44689	0.01441	0.481061	Plasma blood
SHPK	17	3511556	3539616	0.313059	2.4432	0.014556	0.481061	Brain
SHBG	17	7613946	7633382	0.0303	2.43378	0.0149	0.481061	Plasma blood
MSMB	10	46033307	46048180	0.090631	-2.42587	0.01527	0.481061	Plasma blood
NCAN	19	19211958	19252233	0.030074	-2.42632	0.0153	0.481061	Plasma blood
NT5C3A	7	33014130	33062796	0.013747	-2.4214	0.01546	0.481061	Plasma blood
EFEMP1	2	55865967	55924139	0.06499	-2.4125	0.01584	0.481061	Plasma blood
LEMD2	6	33738979	33756913	0.071098	2.4124	0.01585	0.481061	Brain
EIF2B3	1	45316450	45452282	0.0295	2.41023	0.0159	0.481061	Brain
TPSB2	16	1227272	1230184	0.31838	2.41077	0.01592	0.481061	Plasma blood
FGFBP3	10	91906584	91909486	0.153907	2.40028	0.01638	0.489639	Plasma blood
FRMD5	15	44162962	44487450	0.0424	-2.3931	0.016708	0.49413	Brain
ENTPD5	14	73958010	74019399	0.166056	2.3636	0.0181	0.526781	Plasma blood
STARD5	15	81601394	81616524	0.1585	2.3617	0.018191	0.526781	Brain
KREMEN1	22	29073035	29168333	0.045949	2.3544	0.01855	0.531354	Plasma blood
DPYSL5	2	27070615	27173219	0.0822	-2.34946	0.018801	0.531354	Brain
EPS8	12	15773092	16035263	0.034906	2.33653	0.0195	0.531354	Brain
TNFAIP2	14	103589779	103603776	0.07551	2.33608	0.0195	0.531354	Brain
ECI1	16	2289396	2302301	0.40533	-2.33404	0.01959	0.531354	Brain
MIA	19	40771648	40777490	0.244003	-2.33078	0.0198	0.531354	Plasma blood
ACTR1B	2	98272431	98280570	0.259	-2.33001	0.019806	0.531354	Brain
ATIC	2	216176540	216214487	0.169	2.32864	0.019878	0.531354	Brain
ISYNA1	19	18545198	18549111	0.0233	2.3206	0.0203	0.537467	Brain
PEX14	1	10472288	10630758	0.00151	-2.3052	0.02115	0.545757	Plasma blood
GPX1	3	49394609	49396033	0.485486	2.30328	0.02126	0.545757	Brain
BCHE	3	165772904	165837462	0.0583	-2.29727	0.0216	0.545757	Plasma blood
MDP1	14	24683143	24685276	0.071556	2.29571	0.0217	0.545757	Brain
SLC25A13	7	95749532	95951459	0.0807	2.295	0.02173	0.545757	Brain
ISOC1	5	128430444	128449721	0.039214	2.294	0.021791	0.545757	Brain
THG1L	5	157731420	157741449	0.322	2.2881	0.0221	0.548554	Plasma blood
AUH	9	93976097	94124195	0.13016	2.2779	0.0227	0.550012	Brain
SAA2	11	18239223	18248668	0.063297	-2.268	0.0233	0.550012	Plasma blood
AGRP	16	67482571	67483547	0.03163	2.26379	0.02359	0.550012	Plasma blood
SNX1	15	64386322	64438289	0.01988	2.2637	0.023592	0.550012	Brain
GSTZ1	14	77320996	77331597	0.302694	2.2611	0.02375	0.550012	Plasma blood
HINT1	5	131155383	131224468	0.0363	2.2605	0.0238	0.550012	Plasma blood
NUDCD1	8	110253148	110346614	0.13926	2.259	0.0239	0.550012	Brain
N6AMT2	13	21302870	21348097	0.162932	2.2522	0.0243	0.550012	Brain
TCN2	22	30607003	30627271	0.138152	2.2513	0.02437	0.550012	Plasma blood
UBE2F	2	238875469	238951236	0.00631	2.24991	0.024455	0.550012	Brain
HS6ST3	13	96090107	96839562	0.00656	-2.2489	0.02452	0.550012	Plasma blood
ECM1	1	150480538	150486265	0.0833	-2.24177	0.025	0.550012	Brain
EMB	5	49692026	49739082	0.083267	-2.2385	0.025185	0.550012	Brain
KLK14	19	51077495	51084245	0.029998	-2.23776	0.0252	0.550012	Plasma blood
PRPSAP1	17	74305567	74380602	0.005029	-2.2342	0.025467	0.550012	Brain
OBP2B	9	133205277	133209250	0.0408	-2.2313	0.02566	0.550012	Plasma blood
ZNF622	5	16451628	16465901	0.027458	2.2309	0.025691	0.550012	Brain
MTHFD1	14	64388031	64463457	0.016785	-2.2304	0.02572	0.550012	Plasma blood
TMEM65	8	125324231	125384933	0.00311	2.2229	0.0262	0.554736	Brain
FCN3	1	27369110	27374824	0.0497	2.2211	0.02634	0.554736	Plasma blood
DCI	16	2239402	2252300	0.00769	-2.20837	0.02722	0.563128	Plasma blood
P4HB	17	81843159	81860856	0.0192	-2.20444	0.0275	0.563128	Plasma blood
MSR1	8	16107878	16567490	0.046749	-2.203	0.02759	0.563128	Plasma blood
TTC19	17	15902694	15948329	0.017442	2.1986	0.027907	0.563128	Brain
FABP1	2	88422510	88427635	0.204	-2.1934	0.028279	0.563128	Brain
DUS2	16	68021649	68113223	0.02655	2.19126	0.02843	0.563128	Brain
FOLH1	11	49168187	49230222	0.0972	2.19	0.0285	0.563128	Brain
CEL	9	133061981	133071861	0.01444	2.1877	0.02869	0.563128	Plasma blood
GREM1	15	32718004	32745106	0.24448	2.1802	0.02924	0.563128	Plasma blood
RASA4B	7	102122892	102158228	0.032	2.1794	0.0293	0.563128	Brain
PDIA3	15	44038590	44065477	0.02467	-2.1794	0.029302	0.563128	Brain
H6PD	1	9234774	9271337	0.133	2.1768	0.0295	0.563128	Plasma blood
SAA1	11	18266260	18269977	0.12056	-2.1766	0.0295	0.563128	Plasma blood
FBLN7	2	112895962	112945791	0.0331	-2.1729	0.029788	0.563128	Brain
SH3BGRL3	1	26605667	26608007	0.00143	-2.16973	0.03	0.563128	Brain
NOTCH1	9	136494433	136546048	0.01574	-2.1701	0.03	0.563128	Plasma blood
ICAM1	19	10271093	10286615	0.515609	2.16559	0.0303	0.563128	Plasma blood
NDUFAF2	5	60240956	60448853	0.091739	2.1602	0.030753	0.563128	Brain
KPNA6	1	32108056	32176563	0.0399	2.156	0.03108	0.563128	Plasma blood
LGR5	12	71439798	71586310	0.00331	-2.1558	0.0311	0.563128	Plasma blood
SEMA4D	9	89360787	89498130	0.28016	-2.1551	0.03115	0.563128	Plasma blood
MMP2	16	55389700	55506691	0.00595	2.15446	0.0312	0.563128	Plasma blood
MAP1S	19	17830051	17845325	0.15035	2.1517	0.0314	0.563128	Brain
C11orf68	11	65916810	65919062	0.031177	2.1498	0.0316	0.563128	Plasma blood
EARS2	16	23533335	23569052	0.46611	-2.14532	0.03193	0.565385	Brain
POMGNT2	3	43079232	43106079	0.0794	2.14146	0.0322	0.566557	Plasma blood
GREM2	1	240489573	240612155	0.0037	-2.1384	0.03248	0.566983	Plasma blood
ASAP2	2	9346894	9545812	0.0371	2.1343	0.032818	0.566983	Brain
PCP4L1	1	161228517	161255240	-0.00251	2.13211	0.033	0.566983	Brain
C15orf40	15	83657193	83680393	0.25072	-2.1316	0.03304	0.566983	Brain
IHH	2	219054424	219060921	0.00205	-2.1217	0.03386	0.571119	Plasma blood
NPTX1	17	80466834	80477843	0.0671	2.11596	0.0343	0.571119	Plasma blood
PDGFRB	5	150113839	150155872	0.535	-2.1169	0.0343	0.571119	Plasma blood
PRKCA	17	66302613	66810743	0.0439	2.11511	0.0344	0.571119	Plasma blood
SOD3	4	24791534	24802464	0.127396	2.11146	0.0347	0.571119	Brain
SHH	7	155799980	155812463	0.009403	2.1117	0.03471	0.571119	Plasma blood
SPRYD4	12	56862301	56864763	0.150752	2.11017	0.0348	0.571119	Brain
CLN5	13	77564795	77576652	-0.00175	2.1067	0.0351	0.571119	Brain
NEO1	15	73051710	73305205	0.05916	-2.1069	0.03513	0.571119	Plasma blood
PTK7	6	43076307	43161719	0.02079	-2.10428	0.03535	0.571355	Plasma blood
LMAN2	5	177331567	177351668	0.00311	-2.0952	0.0362	0.574323	Plasma blood
PREX1	20	47240790	47444420	0.00925	2.094	0.0363	0.574323	Brain
RANBP6	9	6011043	6015618	0.02839	-2.0932	0.0363	0.574323	Brain
THSD1	13	52377167	52416373	0.11142	2.0929	0.03636	0.574323	Plasma blood
MAPRE1	20	32819954	32850405	0.111524	2.0875	0.0368	0.574742	Plasma blood
AIF1	6	31615217	31617021	0.00865	-2.08794	0.0368	0.574742	Plasma blood
NDUFAF6	8	95907995	96128683	0.05024	-2.0825	0.0373	0.579296	Brain
CECR5	22	17618401	17646177	0.079857	-2.0795	0.0376	0.580711	Brain
IGLON5	19	51815102	51833608	0.05964	2.0715	0.0383	0.588254	Brain
SEC23A	14	39501123	39578850	0.091069	-2.06805	0.0386	0.589604	Brain
PLEK	2	68365282	68397453	0.09516	-2.0623	0.03918	0.592579	Plasma blood
ACYP1	14	75519924	75536186	0.155575	-2.0559	0.0398	0.592579	Brain
HTT	4	3076408	3245676	-0.002025	-2.04987	0.0404	0.592579	Brain
IGFLR1	19	35738801	35742453	0.25179	-2.04924	0.0404	0.592579	Plasma blood
TSPAN9	12	3186521	3395730	0.00864	2.04812	0.0405	0.592579	Brain
INPP5D	2	233924677	234116549	0.0129	-2.04569	0.040787	0.592579	Brain
C8orf47	8	99076539	99105838	0.03629	2.0459	0.0408	0.592579	Brain
GMPS	3	155588325	155661815	0.027961	-2.0396	0.04139	0.592579	Brain
GM2A	5	151212150	151270440	0.124	-2.036	0.0417	0.592579	Plasma blood
NT5E	6	86159809	86205500	0.19961	2.0328	0.04207	0.592579	Brain
POGLUT1	3	119187785	119213555	0.070632	-2.03167	0.04219	0.592579	Brain
EIF2B5	3	183852826	184402546	0.009752	-2.03004	0.04235	0.592579	Brain
LYN	8	55879835	56014169	0.005572	-2.0297	0.04239	0.592579	Plasma blood
PGLYRP3	1	153297116	153312952	0.0147	-2.0281	0.04255	0.592579	Plasma blood
COQ3	6	99817276	99842080	0.201484	2.0224	0.04313	0.592579	Brain
TMEM177	2	120436743	120444083	0.0223	2.01605	0.043795	0.592579	Brain
RDX	11	109864295	110296712	0.002671	2.015	0.0439	0.592579	Plasma blood
TRAP1	16	3701640	3767598	0.13247	2.0098	0.04445	0.592579	Brain
VEGFC	4	176683538	176792922	0.024438	2.00765	0.0447	0.592579	Plasma blood
SCRN3	2	175260458	175294303	0.194	-2.00397	0.045073	0.592579	Brain
PDE1B	12	54943134	54973023	0.093317	2.00238	0.0452	0.592579	Brain
CPS1	2	211342406	211543831	0.0286	-2.00193	0.045293	0.592579	Brain
PPTC7	12	110969120	111021125	0.044786	2.0016	0.0453	0.592579	Brain
SNAP91	6	84262599	84419410	0.0143	1.9988	0.04563	0.592579	Brain
LETMD1	12	51441745	51454207	0.011738	-1.99799	0.0457	0.592579	Brain
COX11	17	53029263	53046146	0.090992	-1.9969	0.045833	0.592579	Brain
C20orf194	20	3229951	3388272	0.00175	1.997	0.0459	0.592579	Brain
S100A16	1	153606886	153613145	0.0484	1.9938	0.04617	0.592579	Plasma blood
ACADVL	17	7217125	7225266	0.0023	-1.99392	0.0462	0.592579	Plasma blood
CPM	12	69235977	69365350	0.042379	1.99158	0.0464	0.592579	Brain
SYNE1	6	152442819	152958936	0.034694	1.9904	0.04655	0.592579	Brain
FUT8	14	65410592	65744121	0.052178	1.9902	0.04656	0.592579	Plasma blood
CGREF1	2	27321757	27341995	0.00289	1.99004	0.046586	0.592579	Brain
MKRN1	7	140152840	140179369	0.115	-1.9871	0.04691	0.592579	Brain
LMAN2L	2	96705929	96740064	0.02616	1.984	0.04725	0.592579	Plasma blood
RHPN2	19	33469499	33555794	0.06198	1.9831	0.0474	0.592579	Brain
C6	5	41142116	41261438	0.0552	-1.9814	0.0475	0.592579	Plasma blood
LIPN	10	88759982	88779626	0.276844	1.97716	0.04802	0.592579	Plasma blood
ARHGEF25	12	58003963	58013162	0.080658	1.97608	0.0481	0.592579	Brain
UGDH	4	39500375	39529931	0.029465	1.97654	0.0481	0.592579	Brain
CTSB	8	11842524	11869533	0.205617	-1.9761	0.04814	0.592579	Plasma blood
AARS2	6	44267391	44281063	0.18957	1.9758	0.04818	0.592579	Brain
S100A13	1	153591263	153606568	0.534	1.97538	0.0482	0.592579	Brain
ERAP2	5	96875986	96919703	0.478	-1.974	0.0484	0.592579	Plasma blood
GPC5	13	92050929	93519490	0.02392	-1.9718	0.0486	0.592579	Brain
SARDH	9	136528682	136605077	0.09234	-1.9719	0.0486	0.592579	Brain
PSMB9	6	32811913	32827362	0.058786	1.9638	0.04955	0.599686	Brain
ASAH1	8	17913934	17942494	0.09748	-1.9569	0.0504	0.599686	Brain
CD300C	17	74541073	74546115	0.0546	1.95638	0.0504	0.599686	Plasma blood
UPF3A	13	115047059	115071283	0.167698	1.9544	0.0506	0.599686	Brain
SEC23B	20	18488137	18542059	0.03925	-1.952	0.0509	0.599686	Brain
EVL	14	99971449	100144236	0.008856	1.9521	0.05092	0.599686	Plasma blood
APOA1BP	1	156591756	156609507	0.119	-1.951	0.05105	0.599686	Plasma blood
IFIT2	10	91061712	91069033	0.106	-1.95085	0.051074	0.599686	Brain
AKR1B1	7	134127102	134144036	0.0409	1.9497	0.05122	0.599686	Brain
NAT6	3	50333833	50336852	0.100258	-1.94865	0.05134	0.599686	Brain
PAK4	19	39616410	39673456	0.02099	-1.9391	0.0525	0.607909	Brain
CBR1	21	37442239	37445464	0.13	-1.939	0.05252	0.607909	Brain
ZFYVE1	14	73436159	73493920	0.032247	-1.93747	0.0527	0.607909	Brain
TPD52L2	20	62496596	62522898	0.0234	-1.932	0.0534	0.608866	Brain
SIRPA	20	1875154	1920543	0.71753	-1.932	0.0534	0.608866	Brain
DLL1	6	170282206	170306565	0.01431	1.93137	0.05344	0.608866	Plasma blood
MATN3	2	19992052	20012668	0.25901	-1.927	0.05398	0.610244	Plasma blood
TMEM132A	11	60924460	60937159	0.23082	1.9271	0.054	0.610244	Plasma blood
DDAH2	6	31694815	31698394	0.222953	1.9234	0.05443	0.612609	Brain
TBCC	6	42712219	42714558	0.151249	1.9216	0.05465	0.612609	Brain
DGKQ	4	952675	980683	0.110677	-1.91566	0.0554	0.616251	Brain
RSPO1	1	37611350	37634892	0.0558	1.9113	0.05596	0.616251	Plasma blood
NASP	1	46049518	46084566	0.0254	-1.91111	0.056	0.616251	Brain
INPP4B	4	142944313	143768585	0.038335	-1.90854	0.0563	0.616251	Brain
VPS13A	9	79792269	80036457	0.01273	-1.9078	0.0564	0.616251	Brain
TFG	3	100428205	100467810	0.122519	-1.90789	0.05641	0.616251	Brain
GAS2L1	22	29702572	29708774	0.012533	-1.9056	0.0567	0.616251	Brain
CARS	11	3022152	3078843	0.0163	1.903	0.057	0.616251	Brain
STAT6	12	57489191	57525922	0.086498	-1.9017	0.0572	0.616251	Brain
DNM1	9	130965658	131017527	0.02168	1.9	0.0574	0.616251	Brain
RPE	2	210867289	210886300	0.0822	-1.89637	0.057911	0.616251	Brain
ACLY	17	40023161	40086795	0.006084	-1.8963	0.057917	0.616251	Brain
FGGY	1	59762310	60233347	0.0147	1.89571	0.058	0.616251	Brain
LCT	2	135787850	135837184	0.27647	1.8935	0.05829	0.616251	Plasma blood
CACNA2D3	3	54122547	55074557	0.0362	-1.89336	0.0583	0.616251	Plasma blood
CTNND1	11	57520715	57587018	0.0493	1.8894	0.0588	0.618838	Brain
CEP41	7	130033612	130082274	0.124	-1.8883	0.05899	0.618838	Brain
S100A12	1	153373711	153375621	0.0289	-1.8793	0.0602	0.628884	Plasma blood
SNX6	14	35030300	35099389	0.066767	1.87778	0.0604	0.628884	Brain
APPL2	12	105567074	105630016	-0.002289	1.8756	0.0607	0.629649	Brain
ST3GAL6	3	98732236	98821201	0.232	-1.86927	0.0616	0.631632	Plasma blood
REG1B	2	79085023	79088019	0.04901	1.8688	0.06165	0.631632	Plasma blood
DNAL1	14	74111578	74170435	0.037485	1.86822	0.0617	0.631632	Brain
TARS	5	33440696	33468091	0.0142	-1.8675	0.0618	0.631632	Plasma blood
SNUPN	15	75598083	75626469	0.04807	-1.8625	0.06253	0.636752	Plasma blood
CNDP2	18	72163051	72188366	0.053914	1.854	0.06369	0.640156	Brain
NT5C3B	17	39981335	39992523	0.222954	1.8528	0.063906	0.640156	Brain
VASN	16	4371848	4383538	0.00655	1.85095	0.06418	0.640156	Plasma blood
UROS	10	127477146	127511817	0.286	1.84951	0.064385	0.640156	Brain
PTPMT1	11	47586982	47595013	0.0414	1.8483	0.0646	0.640156	Brain
CCDC90B	11	82970139	82997450	0.042	1.8475	0.0647	0.640156	Brain
ORAI2	7	102073553	102097268	0.0256	-1.8466	0.06481	0.640156	Brain
HSCB	22	29138019	29153503	-0.001077	-1.8438	0.0652	0.640156	Brain
RBBP9	20	18467184	18477887	0.03773	-1.843	0.0653	0.640156	Brain
SGIP1	1	66999066	67213982	0.0377	1.8381	0.066	0.640156	Brain
THOP1	19	2785458	2813599	-0.00229	1.8384	0.066	0.640156	Brain
CNPY4	7	99717236	99723134	0.0339	1.8347	0.06655	0.640156	Brain
CRELD1	3	9933793	9945413	0.342	1.83382	0.0667	0.640156	Plasma blood
HINT2	9	35812957	35815351	0.08312	1.8329	0.0668	0.640156	Brain
QDPR	4	17460261	17512206	0.200076	1.83333	0.0668	0.640156	Plasma blood
MICB	6	31494881	31511124	0.16346	1.8322	0.06692	0.640156	Plasma blood
DYNLL2	17	58083419	58095542	0.0644	-1.83055	0.0672	0.640156	Plasma blood
MFAP2	1	16974502	16980632	0.0728	1.8291	0.06738	0.640156	Plasma blood
STX8	17	9250471	9576591	0.0384	1.82825	0.0675	0.640156	Plasma blood
LMCD1	3	8543393	8609805	0.048787	-1.82703	0.06769	0.640156	Brain
PDE2A	11	72287185	72385635	0.00531	-1.8267	0.0677	0.640156	Brain
MBL2	10	52765380	52772784	0.273513	-1.82234	0.0684	0.644583	Plasma blood
LAMC1	1	182992595	183114727	0.01	1.81617	0.0693	0.648356	Brain
UCKL1	20	62571186	62587769	0.01663	1.816	0.0694	0.648356	Brain
CNP	17	41966763	41977740	0.031	-1.81485	0.0695	0.648356	Plasma blood
DCAF6	1	167905021	168045081	0.084	-1.81252	0.0699	0.648359	Brain
TAPT1	4	16162128	16229033	-0.001005	-1.81193	0.07	0.648359	Brain
KIAA1324	1	109656301	109749401	0.059	-1.81042	0.0702	0.648359	Brain
NME1	17	49230897	49239789	0.330872	1.8034	0.071318	0.656503	Brain
RRP12	10	99116115	99161127	0.000391	1.79481	0.072683	0.666861	Brain
DAAM1	14	59655364	59838123	0.015665	-1.78727	0.0739	0.673858	Brain
KLKB1	4	186208979	186258471	0.062513	1.78522	0.0742	0.673858	Plasma blood
AK2	1	33007940	33080996	0.000811	-1.7839	0.07443	0.673858	Plasma blood
EGF	4	109912883	110013766	0.064586	-1.78227	0.0747	0.673858	Plasma blood
SHD	19	4278598	4290721	0.07409	1.7812	0.0749	0.673858	Brain
HARS	5	140673035	140691537	0.00767	-1.7809	0.0749	0.673858	Plasma blood
TLL1	4	165873237	166104457	0.000895	-1.77844	0.0753	0.675271	Plasma blood
TAGLN2	1	159918107	159925507	0.0277	1.7757	0.07579	0.67748	Plasma blood
TGFBR3	1	91680343	91906335	0.011	1.772	0.07639	0.678746	Plasma blood
FCGR2A	1	161505430	161524013	0.487	-1.7718	0.07642	0.678746	Plasma blood
MRPS27	5	71515236	71616473	0.030691	-1.7699	0.076739	0.679409	Brain
ABCF3	3	183903811	183911800	0.024305	-1.76711	0.07721	0.6811	Brain
ARHGEF37	5	148931510	149014531	0.07414	-1.7645	0.07765	0.6811	Brain
ADAM10	15	58887403	59042177	-0.00116	1.7632	0.077875	0.6811	Brain
MCL1	1	150560895	150579738	0.0421	1.763	0.07791	0.6811	Plasma blood
CDK18	1	205473723	205501921	0.0386	-1.76	0.0784	0.682364	Brain
CYSTM1	5	139554227	139661637	0.170805	-1.757	0.078915	0.682364	Brain
ACSF2	17	48503519	48552206	0.069238	1.755	0.079265	0.682364	Brain
LANCL1	2	211295973	211342376	0.0443	-1.75466	0.079317	0.682364	Brain
ALDH4A1	1	19197926	19229275	0.159	1.75365	0.0795	0.682364	Brain
SLC16A7	12	59989848	60176395	0.259619	1.75199	0.0798	0.682364	Brain
MUT	6	49398073	49430904	0.101986	1.7516	0.07983	0.682364	Brain
SLC7A6OS	16	68318406	68344849	0.05508	1.74975	0.08016	0.682364	Brain
EFTUD1	15	82422571	82555104	0.06488	1.7483	0.08042	0.682364	Brain
C5	9	120952335	121050275	0.02449	1.7462	0.08078	0.682364	Plasma blood
BCS1L	2	219523487	219528166	0.0164	1.74572	0.08086	0.682364	Brain
IGHA2	14	106053226	106054732	0.011138	1.74508	0.081	0.682364	Brain
MICAL1	6	109765265	109787171	0.114542	1.7401	0.08184	0.683098	Brain
CHGA	14	92923150	92935285	0.026188	-1.7394	0.08197	0.683098	Plasma blood
ACAD9	3	128598439	128634910	0.004994	-1.73878	0.08207	0.683098	Brain
LRIG3	12	58872149	58920504	0.055191	1.7388	0.08207	0.683098	Plasma blood
MTRF1L	6	153308497	153323820	0.172098	-1.7372	0.08234	0.683299	Brain
PIANP	12	6693791	6700815	0.018056	1.735	0.08275	0.684421	Plasma blood
VPS4A	16	69311350	69326939	0.00509	1.73214	0.08325	0.684421	Plasma blood
CCDC127	5	196986	218330	0.200853	1.7313	0.083393	0.684421	Brain
S100A2	1	153561108	153567890	0.00869	-1.731	0.08346	0.684421	Plasma blood
CST1	20	23747562	23751268	0.102783	-1.7286	0.0839	0.684809	Plasma blood
KIAA1033	12	105501102	105562912	0.008835	-1.72816	0.084	0.684809	Brain
YARS2	12	32880424	32908836	0.084141	-1.72466	0.0846	0.685302	Brain
CRYM	16	21250195	21314404	0.03357	-1.724	0.08471	0.685302	Brain
RMDN1	8	87480486	87526586	0.26319	1.7235	0.0848	0.685302	Brain
MAP6	11	75297963	75380165	0.0467	1.719	0.0856	0.685943	Brain
ALDH6A1	14	74523553	74551196	0.056975	1.71923	0.0856	0.685943	Brain
ACSF3	16	89154783	89222254	0.04777	-1.71673	0.08603	0.685943	Brain
GPX7	1	52602371	52609051	0.143	1.7121	0.08688	0.685943	Plasma blood
PISD	22	32014477	32058418	0.084379	-1.7119	0.0869	0.685943	Brain
SNX8	7	2251770	2354318	0.017219	-1.7118	0.08692	0.685943	Plasma blood
OCLN	5	68788119	68853931	0.067882	-1.7115	0.08699	0.685943	Brain
ARMC6	19	19144384	19170563	0.00438	1.7116	0.087	0.685943	Brain
SLC6A17	1	110693108	110744824	0.196	1.71092	0.0871	0.685943	Brain
PCOLCE2	3	142815922	142889206	0.109	1.70893	0.0875	0.687147	Plasma blood
SELL	1	169690665	169711702	0.145	-1.7068	0.08786	0.687972	Plasma blood
DPP3	11	66247484	66277130	0.0848	-1.7055	0.0881	0.687972	Brain
SACM1L	3	45730548	45786916	0.012433	1.69855	0.0894	0.690392	Brain
IDUA	4	986997	1004564	0.177052	1.69855	0.0894	0.690392	Plasma blood
C1RL	12	7089587	7109238	0.044313	1.698	0.0895	0.690392	Plasma blood
SEZ6L	22	26169462	26383597	0.012636	-1.6973	0.08964	0.690392	Plasma blood
PRTN3	19	840999	848175	0.005011	-1.69672	0.0897	0.690392	Plasma blood
BCL2L13	22	18111621	18213388	0.222758	1.6961	0.0899	0.690392	Brain
APIP	11	34874641	34938046	0.461	1.6937	0.0903	0.691554	Brain
HEBP1	12	13127798	13153207	0.535949	-1.69033	0.091	0.692357	Brain
NPEPL1	20	57264187	57294294	0.01645	1.69	0.091	0.692357	Brain
IDH1	2	209100951	209130798	0.0546	-1.68935	0.091152	0.692357	Brain
CPT2	1	53662101	53679869	0.433	-1.68734	0.0915	0.692809	Brain
MAPKAPK2	1	206684905	206734281	0.0466	-1.6864	0.09171	0.692809	Plasma blood
RFT1	3	53122499	53164478	0.237004	1.68327	0.09232	0.695527	Brain
PYGB	20	25228705	25278650	0.08217	1.681	0.0927	0.696503	Brain
RNPEP	1	201951500	201975275	0.173	1.67872	0.0932	0.697508	Brain
HIBADH	7	27565061	27702614	0.244	1.6774	0.09346	0.697508	Brain
SYN3	22	32908539	33454358	0.15767	1.6731	0.0943	0.697508	Brain
TRIM65	17	73876416	73893084	0.180095	1.6729	0.094345	0.697508	Brain
SLC44A2	19	10713133	10755235	0.01707	1.672	0.0945	0.697508	Brain
TUBA4A	2	220114433	220142892	0.0191	1.67147	0.09463	0.697508	Brain
LILRA6	19	54236592	54242791	0.191227	1.67035	0.0949	0.697508	Plasma blood
KALRN	3	123798870	124445172	0.01678	-1.66954	0.09501	0.697508	Brain
NAP1L4	11	2965667	3013607	0.0141	-1.6679	0.0953	0.697508	Brain
IGFBP6	12	53097436	53102345	0.011543	1.6657	0.09577	0.697508	Plasma blood
CARM1	19	10982189	11033453	0.06495	1.6655	0.0958	0.697508	Brain
DOCK9	13	99445741	99738879	0.008465	-1.665	0.0959	0.697508	Brain
NIT2	3	100053545	100075710	0.640053	1.66382	0.09615	0.697508	Brain
TMEM179B	11	62554887	62557877	0.0116	1.6614	0.0966	0.697508	Brain
LAG3	12	6772512	6778455	0.012072	1.6602	0.09688	0.697508	Plasma blood
ALKBH4	7	102096685	102105323	0.0444	-1.6596	0.09699	0.697508	Brain
SPON1	11	13962723	14268133	0.123763	1.6583	0.0973	0.697508	Plasma blood
SH3BGRL2	6	79631329	79703655	0.08898	-1.65783	0.09735	0.697508	Plasma blood
THBS4	5	79991311	80083287	0.0716	-1.6515	0.0986	0.702765	Plasma blood
SLC25A32	8	104410863	104427417	0.07787	-1.6476	0.0994	0.702765	Brain
PNLIPRP1	10	116590385	116609175	0.021035	1.64779	0.0994	0.702765	Plasma blood
PSAT1	9	78297125	78330093	0.04883	-1.6473	0.09951	0.702765	Plasma blood
MMAA	4	146539415	146581187	0.290007	-1.64661	0.0996	0.702765	Brain
ATP13A2	1	17312453	17338423	0.0369	1.64519	0.0999	0.702765	Brain
ARHGAP25	2	68906733	69053965	0.356	1.64312	0.100357	0.702765	Brain
IL6R	1	154405193	154469450	0.528	1.6405	0.10089	0.702765	Plasma blood
ME3	11	86152150	86383678	0.0166	1.6418	0.101	0.702765	Brain
KBTBD3	11	105921825	105948492	0.00756	1.6402	0.101	0.702765	Brain
DARS	2	135905881	135986100	0.04806	-1.6394	0.10112	0.702765	Plasma blood
OGN	9	92383268	92404696	0.15145	-1.6386	0.10129	0.702765	Plasma blood
PRKCD	3	53190025	53226733	0.12741	-1.63827	0.10137	0.702765	Brain
JMJD7	15	42120283	42129779	0.08693	1.637	0.101632	0.702828	Brain
INHBB	2	120346136	120351803	0.08664	-1.6308	0.10292	0.709726	Plasma blood
MAPK3	16	30114105	30123506	0.17198	-1.62983	0.10314	0.709726	Plasma blood
IGF1R	15	98648539	98964530	0.01837	-1.6279	0.10354	0.710175	Plasma blood
REG1A	2	79120362	79123409	0.04029	1.627	0.10375	0.710175	Plasma blood
TBRG4	7	45139699	45151646	0.266	1.6215	0.10491	0.710175	Brain
SIRT3	11	215458	236931	0.00289	1.6202	0.105	0.710175	Brain
MFNG	22	37469063	37486393	0.015137	-1.6209	0.10504	0.710175	Plasma blood
KHK	2	27309615	27323640	0.564	-1.6192	0.105405	0.710175	Brain
HP	16	72054505	72061055	0.08588	-1.61881	0.10549	0.710175	Plasma blood
TRAF3	14	103243813	103377837	0.071479	-1.6166	0.106	0.710175	Brain
ATP1B2	17	7646627	7657770	0.0896	-1.61365	0.1066	0.710175	Plasma blood
NT5C2	10	104845940	104953056	0.00192	-1.61289	0.106768	0.710175	Brain
STMN4	8	27092840	27115937	0.05929	1.6114	0.1071	0.710175	Brain
PSMF1	20	1093906	1160596	0.11741	1.608	0.1078	0.710175	Brain
ERO1L	14	53106634	53162618	0.004165	-1.60612	0.108	0.710175	Brain
NUDT6	4	123809852	123844123	0.492524	1.60713	0.108	0.710175	Brain
FDXR	17	72858619	72869156	0.549505	1.6061	0.108252	0.710175	Brain
UFL1	6	96969471	97003152	0.06048	1.6043	0.10864	0.710175	Brain
XPNPEP1	10	109864766	109923553	0.033955	-1.60382	0.10875	0.710175	Plasma blood
EBI3	19	4229523	4237528	0.44013	-1.60283	0.109	0.710175	Plasma blood
NFU1	2	69622882	69664760	0.0325	-1.60217	0.109117	0.710175	Brain
PLSCR4	3	145910126	145968966	0.277344	-1.60184	0.10919	0.710175	Brain
MGMT	10	131265448	131566271	0.225	-1.60179	0.109202	0.710175	Brain
HMGCLL1	6	55299167	55444012	0.030429	1.6002	0.10956	0.710175	Brain
FCN1	9	134903232	134917912	0.11636	1.5989	0.10985	0.710175	Plasma blood
FGG	4	154604134	154612967	0.015204	1.59751	0.1102	0.710175	Plasma blood
CLIC4	1	24745382	24844321	0.0317	-1.5952	0.11066	0.710175	Plasma blood
AAK1	2	69688532	69901481	0.0426	1.59453	0.110817	0.710175	Brain
RALB	2	120997640	121052289	0.0348	1.59396	0.110946	0.710175	Brain
CTSO	4	155921580	155953912	0.009841	-1.59354	0.111	0.710175	Plasma blood
PFKP	10	3108525	3179904	0.00102	1.59187	0.111413	0.710175	Brain
PNMAL2	19	46990163	46999755	0.05659	1.5914	0.1115	0.710175	Brain
PDCD1LG2	9	5510531	5571282	0.19427	-1.5913	0.11153	0.710175	Plasma blood
SCGN	6	25652464	25702011	0.01264	1.5878	0.112	0.710175	Brain
PTPRU	1	29236516	29326813	0.0253	-1.5891	0.11204	0.710175	Plasma blood
VAMP1	12	6571403	6580153	0.031655	1.58715	0.1125	0.710175	Brain
CFHR1	1	196788887	196801319	0.208	-1.58552	0.113	0.710175	Brain
TMED2	12	123584533	123598582	0.000911	1.5833	0.11336	0.710175	Plasma blood
MTMR7	8	17155539	17271037	0.00359	1.5821	0.1136	0.710175	Brain
TBC1D5	3	17157162	18444817	-1.97e-05	1.58131	0.1138	0.710175	Plasma blood
SLC1A4	2	65215611	65250999	0.0742	1.58073	0.113939	0.710175	Brain
GCSH	16	81115566	81130008	0.0476	-1.58057	0.11398	0.710175	Brain
DDHD1	14	53510686	53620000	0.011357	-1.57985	0.114	0.710175	Brain
ANPEP	15	89784895	89815401	0.00495	-1.5774	0.11469	0.710175	Plasma blood
CRK	17	1420689	1463162	0.0182	-1.57723	0.1147	0.710175	Plasma blood
CNTN1	12	40692439	41072415	0.036702	-1.5773	0.11472	0.710175	Plasma blood
CENPV	17	16245848	16256970	0.048208	-1.5758	0.115068	0.710175	Brain
DNAJA4	15	78556428	78574538	0.14788	1.5756	0.115126	0.710175	Brain
HHATL	3	42734155	42744319	0.118412	-1.57436	0.1154	0.710175	Brain
C1S	12	6988259	7071032	0.248374	-1.5741	0.11547	0.710175	Plasma blood
RGS10	10	119499817	119542719	0.001397	1.57097	0.11619	0.710175	Plasma blood
EXOG	3	38537618	38583652	0.070858	1.5701	0.11639	0.710175	Brain
PAICS	4	57301907	57327534	0.032651	-1.56918	0.1166	0.710175	Brain
S100A1	1	153600402	153604513	0.053	1.56608	0.117	0.710175	Brain
FXN	9	71650175	71715094	0.08652	-1.5666	0.117	0.710175	Brain
APMAP	20	24962925	24992751	0.009598	-1.5665	0.117	0.710175	Plasma blood
SUCLG1	2	84650647	84687169	0.0336	1.56561	0.117439	0.710359	Brain
SELP	1	169588849	169630193	0.0802	1.5595	0.11887	0.710359	Plasma blood
ANO5	11	22214722	22304903	0.267	1.559	0.119	0.710359	Brain
COLEC12	18	316737	500722	0.018444	1.5581	0.119	0.710359	Plasma blood
FAM21C	10	46222648	46288409	0.058	1.55586	0.119741	0.710359	Brain
SCCPDH	1	246887349	246931439	0.0793	1.55434	0.12	0.710359	Brain
FREM2	13	38687077	38887131	0.00737	-1.5532	0.12038	0.710359	Plasma blood
F13B	1	197038741	197067260	0.123	-1.5516	0.12076	0.710359	Plasma blood
ARMC10	7	102715328	102740205	0.145	1.5515	0.12079	0.710359	Brain
N6AMT1	21	30244513	30257693	0.344	1.55	0.12124	0.710359	Brain
TMEM143	19	48835613	48867494	-0.00264	1.5488	0.1214	0.710359	Brain
TUBA8	22	18593097	18629321	0.047318	-1.5484	0.1215	0.710359	Brain
BCAT2	19	48795062	48811029	0.108027	-1.54751	0.1217	0.710359	Plasma blood
MRE11A	11	94152895	94227074	0.0564	1.5473	0.122	0.710359	Brain
TPMT	6	18128542	18155305	0.489461	-1.5454	0.12226	0.710359	Brain
PACSIN1	6	34433916	34503006	-0.002483	-1.5452	0.1223	0.710359	Brain
GGH	8	63927638	63951730	0.03104	-1.5448	0.1224	0.710359	Brain
AKR1D1	7	138002324	138118305	0.010617	-1.5447	0.12242	0.710359	Plasma blood
HSPC159	2	64453969	64461381	0.03336	1.5446	0.12244	0.710359	Plasma blood
SPOCK2	10	72059034	72089032	0.029813	1.54415	0.12255	0.710359	Plasma blood
NUCB2	11	17229700	17371521	0.0496	1.5436	0.123	0.710359	Brain
NTM	11	131370478	132336822	0.187727	-1.5439	0.123	0.710359	Plasma blood
PGP	16	2261998	2264808	0.03394	-1.54055	0.12343	0.710359	Brain
RAB5B	12	56367697	56388490	0.012229	1.53891	0.1238	0.710359	Brain
LRRC16A	6	25279306	25620758	0.02362	-1.5369	0.124	0.710359	Brain
STOM	9	124101355	124132531	0.00917	-1.5378	0.124	0.710359	Brain
SEMA4A	1	156147366	156177752	0.0338	1.5355	0.12466	0.710359	Plasma blood
TRNT1	3	3168600	3192563	0.091606	1.53522	0.12473	0.710359	Brain
CLMP	11	123069872	123195248	0.093958	1.5307	0.126	0.710359	Plasma blood
NPM2	8	21881636	21894408	0.00282	-1.5289	0.1263	0.710359	Brain
EIF4B	12	53006282	53042215	0.002832	1.5282	0.12646	0.710359	Plasma blood
SAMHD1	20	35518632	35580246	0.0189	-1.527	0.1267	0.710359	Brain
FUCA2	6	143815948	143832827	0.2219	1.5264	0.12692	0.710359	Brain
CTSF	11	66330934	66336312	0.0196	1.5249	0.127	0.710359	Brain
CD274	9	5450503	5470566	0.04959	-1.526	0.12701	0.710359	Plasma blood
CSE1L	20	47662849	47713489	0.07834	1.525	0.1272	0.710359	Brain
XRCC6	22	42017123	42060044	0.02619	-1.5249	0.1273	0.710359	Brain
TMEM175	4	926175	952444	0.010091	1.52449	0.1274	0.710359	Brain
ATE1	10	123499939	123688316	0.189	1.52404	0.127499	0.710359	Brain
CDA	1	20915441	20945401	0.114	-1.52246	0.128	0.710359	Brain
SLC25A29	14	100757448	100772884	0.025139	-1.52025	0.128	0.710359	Brain
FJX1	11	35618460	35620865	0.036659	1.522	0.128	0.710359	Plasma blood
RAB21	12	71754863	71800286	0.007437	-1.5211	0.12822	0.710359	Plasma blood
SENP8	15	72406599	72433311	0.08557	1.5207	0.128344	0.710359	Brain
TMCC2	1	205197304	205242471	0.0652	-1.51752	0.129	0.710359	Brain
DHRS1	14	24759804	24769039	0.189144	-1.51926	0.129	0.710359	Brain
MAP1LC3B	16	87417601	87438385	-0.00155	1.51788	0.12904	0.710359	Brain
CAMKK2	12	121675497	121736111	0.048737	1.5165	0.1294	0.710933	Brain
OSGEP	14	20914570	20923264	0.042201	-1.51405	0.13	0.711276	Brain
COL6A1	21	45981770	46005050	0.50453	-1.5132	0.13	0.711276	Plasma blood
UXS1	2	106093308	106194301	0.02703	-1.5132	0.13023	0.711276	Plasma blood
VEGFA	6	43770184	43786487	0.01388	-1.51162	0.13063	0.712062	Plasma blood
GRWD1	19	48949030	48960279	0.06523	1.5076	0.1317	0.715231	Brain
PLCXD3	5	41307056	41510730	0.075597	-1.5073	0.131726	0.715231	Brain
GFM2	5	74017029	74063196	0.459248	-1.5046	0.132418	0.717587	Brain
TNFSF12	17	7549058	7557890	0.0105	1.5024	0.133	0.719183	Plasma blood
ANG	14	20684177	20698971	0.136212	-1.5015	0.13323	0.719183	Plasma blood
FAM98C	19	38893775	38899728	0.01647	-1.4981	0.1341	0.721211	Brain
FCGR3A	1	161541759	161550737	0.412	1.4974	0.13429	0.721211	Plasma blood
WFIKKN2	17	50834650	50842353	0.219	1.49625	0.1346	0.721211	Plasma blood
GALNT16	14	69259277	69357033	0.046997	-1.4952	0.13487	0.721211	Plasma blood
ASIP	20	34194569	34269344	0.128414	-1.49473	0.135	0.721211	Plasma blood
CRISP2	6	49692358	49713590	0.12361	1.49331	0.13536	0.721211	Plasma blood
CD58	1	116514534	116571039	0.0155	1.4926	0.13555	0.721211	Plasma blood
LSS	21	47608055	47648738	0.361	1.491	0.13583	0.721211	Brain
INHBA	7	41667168	41705834	0.004008	-1.4906	0.13607	0.721211	Plasma blood
PIK3IP1	22	31677579	31688520	0.022617	-1.4899	0.1362	0.721211	Brain
ERLEC1	2	53787044	53818819	0.01627	-1.4867	0.13708	0.721711	Plasma blood
SKIV2L	6	31926857	31937532	0.008913	1.4853	0.13747	0.721711	Brain
DTNBP1	6	15523032	15663289	0.008114	1.4838	0.13786	0.721711	Brain
VTI1B	14	67647085	67674820	0.008382	1.483	0.13807	0.721711	Plasma blood
ABHD11	7	73150424	73153197	0.266	-1.4815	0.13848	0.721711	Brain
SMAP1	6	70667776	70862011	0.2381	1.48145	0.13849	0.721711	Plasma blood
LSAMP	3	115802363	117139389	0.0331	1.48072	0.1387	0.721711	Plasma blood
HSPG2	1	21822244	21937310	0.0573	1.48	0.13887	0.721711	Plasma blood
EFHD2	1	15736391	15756839	0.024	-1.48065	0.139	0.721711	Brain
PUSL1	1	1243947	1247057	0.00553	-1.47783	0.139	0.721711	Brain
GART	21	34876238	34915797	0.472	1.479	0.13915	0.721711	Brain
RSPO3	6	127118671	127199481	0.12358	1.47509	0.14019	0.725751	Plasma blood
DENND4C	9	19230433	19374139	0.0216	1.4714	0.141	0.728267	Brain
CSDC2	22	41956767	41973745	0.221114	1.4713	0.1412	0.728267	Brain
TMCC3	12	94960900	95044338	-0.00207	-1.46908	0.1418	0.730007	Brain
NOTCH3	19	15159038	15200995	0.011483	-1.46601	0.1426	0.732118	Plasma blood
VPS24	2	86503430	86563479	0.02334	1.4652	0.14287	0.732118	Plasma blood
SVIP	11	22835345	22851845	0.0151	1.4655	0.143	0.732118	Brain
PLXNB2	22	50274979	50307646	0.201995	1.4623	0.14367	0.733512	Plasma blood
ARFIP1	4	152779937	152918463	0.08699	1.46166	0.1438	0.733512	Plasma blood
PTGES	9	132500610	132515326	-0.00172	-1.4586	0.145	0.735548	Brain
AP3B2	15	83328033	83378666	0.01184	1.4553	0.145587	0.735548	Brain
CHST4	16	71525233	71538748	0.01695	1.45341	0.14611	0.735548	Plasma blood
KLHL3	5	136953189	137071779	0.013417	1.4531	0.146184	0.735548	Brain
COX7A2L	2	42560686	42652228	0.026	1.45279	0.146281	0.735548	Brain
CDH13	16	82660408	83830204	0.01654	1.45249	0.14637	0.735548	Brain
EPHA1	7	143390289	143408856	0.288917	1.4517	0.14659	0.735548	Plasma blood
B4GALT7	5	177600132	177610330	0.0165	-1.4482	0.1476	0.735548	Plasma blood
DHTKD1	10	12110971	12165224	0.524	-1.44781	0.147669	0.735548	Brain
WIPF1	2	175424300	175547644	0.0071	1.44767	0.147708	0.735548	Brain
GUK1	1	228139962	228148984	0.143	1.4472	0.14783	0.735548	Plasma blood
CMPK1	1	47799469	47844511	0.139	-1.44668	0.148	0.735548	Brain
GCAT	22	38203912	38213183	0.485573	-1.4468	0.148	0.735548	Brain
CAND2	3	12837971	12913415	0.461632	-1.44603	0.14817	0.735548	Brain
SLC7A6	16	68298433	68335722	0.0339	1.44487	0.14849	0.735548	Brain
MBLAC2	5	89754020	89770585	0.029788	-1.4442	0.14869	0.735548	Brain
GRAMD1C	3	113828182	113947174	0.145	1.44377	0.1488	0.735548	Plasma blood
PLCG1	20	39765600	39811629	0.08734	-1.442	0.1493	0.735548	Brain
RAB27B	18	52385091	52562747	0.191741	-1.441	0.14945	0.735548	Brain
LAP3	4	17577198	17607972	0.013428	-1.44107	0.1496	0.735548	Plasma blood
GDE1	16	19513015	19533467	0.05154	-1.44002	0.14986	0.735548	Brain
GLRX2	1	193090866	193106114	0.0361	-1.4395	0.15002	0.735548	Plasma blood
ACVRL1	12	51906908	51923361	0.039205	1.4379	0.15047	0.736137	Plasma blood
SLC25A22	11	790475	798316	0.0378	1.4355	0.151	0.736137	Brain
GMPR2	14	24232422	24239242	0.079308	-1.4344	0.15146	0.736137	Plasma blood
PLEKHA1	10	122374696	122442602	0.025208	-1.43294	0.15187	0.736137	Plasma blood
PRKCSH	19	11435284	11450968	0.02712	-1.43162	0.1523	0.736137	Plasma blood
SLITRK3	3	165186720	165197109	0.0696	-1.43107	0.1524	0.736137	Plasma blood
PRSS22	16	2852730	2858170	0.03963	-1.42972	0.1528	0.736137	Plasma blood
STAM2	2	152973315	153032506	0.0877	-1.42936	0.1529	0.736137	Brain
SERPINA9	14	94462717	94479689	0.017196	1.4274	0.15346	0.736137	Plasma blood
NOTUM	17	81952507	81961840	0.00285	-1.42598	0.1539	0.736137	Plasma blood
MMP10	11	102770502	102780628	0.035215	-1.4252	0.154	0.736137	Plasma blood
MPI	15	75182346	75191798	0.22917	-1.4252	0.154101	0.736137	Brain
GTDC1	2	144695635	145090135	0.0193	1.4226	0.154852	0.736137	Brain
CFB	6	31945650	31952084	0.11286	-1.42249	0.15489	0.736137	Plasma blood
ANKRD29	18	21178890	21242849	0.024714	-1.421	0.15518	0.736137	Brain
PYGL	14	50857891	50944483	0.041825	1.4211	0.15528	0.736137	Plasma blood
SIGLEC7	19	51142299	51153526	0.049431	-1.42103	0.1553	0.736137	Plasma blood
COL2A1	12	47972967	48004554	0.093752	1.4191	0.15586	0.736137	Plasma blood
TATDN3	1	212965170	212989968	0.0409	1.41791	0.156	0.736137	Brain
LRRC32	11	76657524	76670747	0.00241	1.418	0.156	0.736137	Plasma blood
NQO2	6	2988221	3019996	0.206834	1.4174	0.15637	0.736137	Brain
EPHA4	2	221418027	221574202	0.02857	1.4171	0.15645	0.736137	Plasma blood
ATRN	20	3471018	3651118	0.092487	-1.41372	0.157	0.736137	Plasma blood
PPIH	1	42658335	42676758	0.00311	-1.4125	0.1578	0.736137	Plasma blood
C3orf18	3	50595462	50608458	0.092925	1.41188	0.15799	0.736137	Brain
VIPAS39	14	77893018	77924295	0.087461	-1.41168	0.158	0.736137	Brain
FCGR2B	1	161663147	161678654	0.39	-1.4115	0.15811	0.736137	Plasma blood
SCAMP5	15	75249560	75313837	0.02093	1.4101	0.158512	0.736137	Brain
TMED8	14	77801364	77843452	0.120903	1.40883	0.159	0.736137	Brain
TKT	3	53258723	53290068	0.203622	-1.4074	0.15931	0.736137	Brain
YWHAZ	8	100916523	100953388	0.001866	-1.4065	0.15958	0.736137	Plasma blood
YES1	18	721588	812547	0.01459	1.405	0.15999	0.736137	Brain
FGF7	15	49423237	49488775	0.01258	1.4049	0.16006	0.736137	Plasma blood
RPA3	7	7676149	7758238	0.0026	-1.4044	0.16019	0.736137	Brain
MAN2B2	4	6576902	6625089	0.21384	1.40348	0.1605	0.736137	Brain
TNFRSF17	16	11965210	11968068	0.01394	-1.4033	0.16053	0.736137	Plasma blood
ACAA2	18	47309869	47340330	0.005486	1.402	0.16096	0.736137	Brain
MARC2	1	220921567	220958150	0.067	1.40199	0.161	0.736137	Brain
DNAJB4	1	77979175	78017964	0.0396	1.4	0.16151	0.736137	Plasma blood
PPCS	1	42456117	42473385	0.0972	1.3985	0.16195	0.736137	Plasma blood
SIDT1	3	113251143	113348425	0.134413	1.3985	0.16196	0.736137	Brain
TMEM25	11	118401756	118417995	0.0594	-1.3978	0.162	0.736137	Brain
GOT2	16	58741035	58768261	0.11385	-1.39648	0.16257	0.736137	Brain
SERPINA4	14	94561442	94569913	0.203395	1.3954	0.16291	0.736137	Plasma blood
SWAP70	11	9664077	9752993	0.171952	1.3949	0.163	0.736137	Plasma blood
MX1	21	41420020	41470071	0.08091	1.395	0.163	0.736137	Plasma blood
EPHA5	4	65319563	65670495	0.017039	1.39392	0.1633	0.736137	Plasma blood
ST8SIA6	10	17315421	17454595	0.006679	-1.39313	0.16358	0.736137	Plasma blood
MRC1	10	17809348	17911164	0.162251	1.39155	0.16406	0.736137	Plasma blood
HSD17B4	5	118788138	118972894	0.229757	-1.3885	0.164991	0.736137	Brain
TNFRSF1A	12	6328757	6342114	0.017409	1.3859	0.16578	0.736137	Plasma blood
CADPS2	7	121958481	122526813	-0.000185	1.3841	0.16633	0.736137	Brain
ITIH2	10	7703316	7749520	0.225512	-1.38391	0.16639	0.736137	Plasma blood
FST	5	53480626	53487134	-7.42e-05	1.3839	0.1664	0.736137	Plasma blood
ST3GAL1	8	133454848	133571940	0.060857	-1.3827	0.16675	0.736137	Plasma blood
CAMK2D	4	114372188	114683083	0.011841	1.38233	0.1669	0.736137	Brain
NUDT14	14	105639275	105647660	0.091478	-1.38208	0.167	0.736137	Brain
ADH1B	4	100226121	100242558	-0.001979	-1.38048	0.1674	0.736137	Brain
ACP6	1	147629652	147670524	0.35	-1.38	0.16758	0.736137	Plasma blood
HMHA1	19	1065923	1086628	0.051829	-1.37924	0.1678	0.736137	Plasma blood
ARHGAP32	11	128834955	129149219	0.0336	-1.3801	0.168	0.736137	Brain
MTAP	9	21802636	21937651	0.00187	1.3776	0.16833	0.736137	Plasma blood
GDAP1	8	75233365	75401107	0.06685	1.3775	0.1684	0.736137	Brain
CRLF1	19	18572220	18607741	0.036998	1.37676	0.1686	0.736137	Plasma blood
PIK3CD	1	9711790	9789172	0.031	1.374	0.169	0.736137	Brain
DHRS7	14	60610838	60636574	0.103723	1.37653	0.169	0.736137	Brain
SFXN4	10	120900279	120925179	0.251	1.37526	0.16905	0.736137	Brain
ULK3	15	75128457	75135687	0.43723	1.375	0.169122	0.736137	Brain
CA8	8	61099906	61193971	0.06725	1.3748	0.1692	0.736137	Brain
TMEM106B	7	12250867	12282993	0.277	1.3747	0.16923	0.736137	Brain
NME2	17	51165435	51171744	0.148	-1.37439	0.1693	0.736137	Plasma blood
AK1	9	127866486	127877675	0.03231	1.373	0.16976	0.736137	Plasma blood
CRP	1	159712289	159714589	0.0324	-1.3723	0.16998	0.736137	Plasma blood
C19orf53	19	13884982	13889276	0.02302	-1.3723	0.17	0.736137	Brain
LRPAP1	4	3503612	3532446	0.057597	-1.37205	0.17	0.736137	Plasma blood
DAPP1	4	99816827	99870190	0.058752	-1.36909	0.171	0.739316	Plasma blood
CCDC93	2	118673054	118771709	0.0491	-1.36773	0.171398	0.739886	Brain
TXNRD3	3	126290622	126373998	-0.00378	1.36583	0.17199	0.740478	Brain
CHMP3	2	86730554	86948245	0.0227	1.36559	0.172068	0.740478	Brain
AP4E1	15	51200869	51298097	0.06203	1.3636	0.17268	0.741964	Brain
C11orf54	11	93474757	93497915	0.581	1.3595	0.174	0.742748	Brain
C2CD2	21	43305221	43373999	0.0487	-1.359	0.17413	0.742748	Brain
TNFAIP8	5	119268692	119399688	0.0505	1.3589	0.1742	0.742748	Plasma blood
IQSEC3	12	175931	287626	-0.00142	-1.35844	0.1743	0.742748	Brain
CCDC109B	4	110481361	110609874	-0.004568	-1.3586	0.1743	0.742748	Brain
SESTD1	2	179966419	180129517	0.0165	-1.35696	0.174795	0.742748	Brain
NEGR1	1	71395943	72282539	0.00522	1.3566	0.17491	0.742748	Plasma blood
ASS1	9	133320316	133376661	0.06625	-1.3553	0.175	0.742748	Brain
PLXND1	3	129555214	129606676	0.0497	-1.35381	0.1758	0.744718	Plasma blood
CHMP4A	14	24678789	24683075	0.044457	1.35281	0.176	0.744718	Brain
RNMTL1	17	685513	695749	0.097047	1.3508	0.176746	0.74655	Brain
PPA1	10	71962586	71993667	-4.2e-07	1.35014	0.17697	0.74655	Brain
NCAM2	21	22370633	22915650	-0.000498	1.348	0.17755	0.747862	Brain
COL6A3	2	237324003	237414328	0.02303	1.3436	0.17908	0.753166	Plasma blood
LYZ	12	69742121	69748014	0.029761	1.3415	0.1798	0.754401	Brain
COLEC11	2	3594832	3644644	0.13339	-1.3407	0.18002	0.754401	Plasma blood
PLEKHO2	15	65134088	65160206	0.01493	-1.3385	0.180741	0.754401	Brain
UROD	1	45477819	45481247	0.0229	-1.33736	0.181	0.754401	Brain
SNX19	11	130745331	130786404	0.0923	1.3392	0.181	0.754401	Brain
SLC6A7	5	149569520	149602351	0.054001	1.3377	0.181002	0.754401	Brain
RABEP1	17	5185558	5289129	0.127557	1.3351	0.181832	0.755377	Brain
REG3G	2	79025686	79028505	0.11659	-1.3333	0.18243	0.755377	Plasma blood
NLGN2	17	7404874	7419860	0.0229	-1.33257	0.1827	0.755377	Plasma blood
C9orf78	9	132589569	132598142	0.00218	-1.3309	0.183	0.755377	Brain
GNAQ	9	80331003	80646374	0.03347	1.3317	0.183	0.755377	Brain
PFKM	12	48105139	48146404	0.003959	-1.3314	0.18307	0.755377	Plasma blood
AP1G2	14	23559565	23568070	0.031243	1.3306	0.18331	0.755377	Plasma blood
CCDC134	22	41800679	41832164	0.058641	1.3303	0.18341	0.755377	Plasma blood
LMBRD1	6	70385694	70507003	0.054642	-1.3281	0.18414	0.757262	Brain
PPP2R5C	14	102228135	102394326	0.170891	1.32698	0.185	0.758543	Brain
BDH2	4	104000592	104021040	0.112528	-1.32499	0.1852	0.758543	Brain
TNFRSF11B	8	118923557	118951885	0.007545	-1.3239	0.18554	0.758543	Plasma blood
GBP2	1	89106132	89150456	0.00759	1.3235	0.18566	0.758543	Plasma blood
SERPINF1	17	1762029	1777565	0.144	-1.32252	0.186	0.758543	Plasma blood
CHI3L1	1	203178931	203186704	0.345	1.3217	0.18625	0.758543	Plasma blood
SEMA6A	5	116443555	116574823	0.0227	-1.3183	0.1874	0.758543	Plasma blood
PACS1	11	65837834	66012218	0.0209	-1.3164	0.188	0.758543	Brain
MCAT	22	43528212	43539400	0.030413	1.3164	0.188	0.758543	Brain
MANSC4	12	27762427	27780236	0.282782	1.3163	0.18807	0.758543	Plasma blood
HHIP	4	144646156	144745271	0.01401	1.31609	0.1881	0.758543	Plasma blood
SLAMF6	1	160485030	160523262	0.0466	1.3157	0.18828	0.758543	Plasma blood
C1R	12	7080214	7092540	0.080694	1.3155	0.18833	0.758543	Plasma blood
TYMP	22	50525752	50530032	0.045144	-1.3127	0.18928	0.758543	Plasma blood
DBR1	3	137879854	137893791	0.058336	-1.31178	0.18959	0.758543	Brain
TEX264	3	51696709	51738339	0.024268	1.31111	0.18982	0.758543	Brain
MXRA8	1	1352689	1361777	0.00487	-1.3107	0.18995	0.758543	Plasma blood
VWA2	10	114239254	114294489	0.029364	1.31062	0.18999	0.758543	Plasma blood
GLRX	5	95751319	95822726	0.00312	1.3107	0.19	0.758543	Plasma blood
PRSS1	7	142749468	142753076	0.00823	-1.3105	0.19003	0.758543	Plasma blood
KIAA1468	18	59854491	59974355	0.055268	-1.309	0.19037	0.758543	Brain
ADCY9	16	4003388	4166186	0.05734	1.30844	0.19072	0.758543	Brain
ACAD8	11	134123389	134135749	0.00329	-1.3085	0.191	0.758543	Brain
NAPG	18	10525905	10552764	0.003098	-1.3082	0.191	0.758543	Plasma blood
PREP	6	105725440	105850959	0.006762	-1.304	0.19225	0.761451	Brain
TINAGL1	1	31576485	31587686	0.00229	1.3039	0.19228	0.761451	Plasma blood
LY6H	8	144239331	144242128	0.08301	1.303	0.1926	0.761633	Brain
HLA-B	6	31321649	31324965	0.056203	-1.3008	0.19333	0.762758	Brain
DTD1	20	18587942	18766644	0.272812	1.29906	0.194	0.762758	Plasma blood
ROCK2	2	11319887	11488456	0.0393	-1.29783	0.194346	0.762758	Brain
PFKL	21	45719934	45747259	0.126	1.295	0.19543	0.762758	Brain
FKBP4	12	2794970	2805423	0.063577	1.294	0.19565	0.762758	Plasma blood
NUDT15	13	48611703	48621358	0.012329	-1.2935	0.1958	0.762758	Brain
GGCT	7	30536237	30591095	0.257	1.2932	0.19594	0.762758	Brain
SNAP47	1	227916240	227968927	0.0833	1.29176	0.196	0.762758	Brain
TSTD1	1	161007421	161008780	0.0646	-1.29338	0.196	0.762758	Brain
CALCB	11	14904997	15082342	0.033138	-1.2942	0.196	0.762758	Plasma blood
AKR1C4	10	5195462	5218949	0.289145	-1.29164	0.19648	0.762758	Plasma blood
C16orf13	16	684429	686358	0.03401	-1.29146	0.19655	0.762758	Brain
SSBP1	7	141438121	141487722	0.0536	1.2912	0.19664	0.762758	Brain
CDC42BPA	1	227177566	227506175	0.0324	-1.29009	0.197	0.762758	Brain
COL6A2	21	46098112	46132848	0.04705	1.2891	0.197	0.762758	Plasma blood
KIRREL2	19	35855861	35867136	0.004491	-1.28774	0.1978	0.76344	Plasma blood
UNC5C	4	95162504	95549206	0.044631	-1.28793	0.1978	0.76344	Plasma blood
PVRL1	11	119494120	119599794	0.0444	-1.2883	0.198	0.76344	Brain
C15orf57	15	40820882	40857256	0.07212	1.2856	0.198579	0.764612	Brain
MPZL1	1	167690429	167761156	0.0244	-1.27865	0.201	0.772147	Brain
TNS3	7	47314752	47622156	0.063	-1.2772	0.20154	0.772147	Brain
RRAS2	11	14299472	14386052	-0.00267	-1.2767	0.202	0.772147	Brain
TANGO2	22	20004537	20053449	0.120304	1.2737	0.2028	0.772147	Brain
ATP5S	14	50779044	50802276	0.205313	1.27307	0.203	0.772147	Brain
DSCAM	21	40010999	40847158	0.01894	-1.2725	0.203	0.772147	Plasma blood
RAB24	5	176728199	176730745	0.060871	1.273	0.203014	0.772147	Brain
MTHFSD	16	86530178	86555235	0.08992	1.27277	0.2031	0.772147	Plasma blood
CRHBP	5	76953045	76981158	0.192	-1.2718	0.2034	0.772147	Plasma blood
GUCY1A3	4	156587863	156653501	0.00937	1.2704	0.2039	0.772147	Brain
L2HGDH	14	50704281	50779266	0.093487	-1.27024	0.204	0.772147	Brain
CARKD	13	111267881	111292340	0.385407	1.2686	0.2046	0.772147	Brain
RNASE3	14	20891385	20892348	0.077446	-1.2681	0.20476	0.772147	Plasma blood
ANGPTL4	19	8363289	8374370	0.014613	1.2679	0.2048	0.772147	Plasma blood
AIF1L	9	131096476	131123152	0.11974	1.2679	0.20483	0.772147	Plasma blood
FCRL6	1	159800511	159816257	0.0662	1.2675	0.20498	0.772147	Plasma blood
TRAPPC12	2	3383446	3488865	-0.00152	-1.26425	0.206139	0.775008	Brain
ST6GALNAC2	17	76565377	76586956	0.000141	-1.26334	0.2065	0.775008	Plasma blood
CMBL	5	10275987	10308138	0.020485	1.263	0.206576	0.775008	Brain
COA7	1	53152508	53164038	0.307	-1.26188	0.207	0.775553	Brain
NPW	16	2009926	2020755	0.00838	-1.25971	0.20777	0.776161	Plasma blood
RELL1	4	37592422	37687998	0.113159	1.2596	0.2078	0.776161	Brain
KCNJ9	1	160051360	160060353	0.207	-1.25911	0.208	0.776161	Brain
GAS6	13	113820549	113864076	0.0715	-1.2583	0.20828	0.776164	Plasma blood
CD14	5	140011313	140013286	0.034918	-1.2574	0.208619	0.776387	Brain
AAMDC	11	77532155	77629478	0.592	1.2568	0.209	0.776658	Brain
SRI	7	87834433	87856308	0.0405	-1.2549	0.20952	0.776658	Brain
PPT1	1	40072710	40097260	0.114	-1.2547	0.2096	0.776658	Plasma blood
F11	4	186266189	186289681	0.083288	-1.25241	0.2104	0.776658	Plasma blood
SLC13A5	17	6588032	6616886	0.060376	-1.2524	0.21041	0.776658	Brain
TBC1D13	9	131549483	131572711	0.10133	-1.2513	0.211	0.776658	Brain
COMT	22	19929130	19957498	0.419752	-1.2504	0.2112	0.776658	Brain
MICAL3	22	18270415	18507325	-0.002579	-1.2499	0.2113	0.776658	Brain
REEP6	19	1491165	1497926	0.11503	-1.2487	0.2118	0.776658	Brain
ETHE1	19	44010871	44031396	0.16759	-1.2477	0.2121	0.776658	Brain
TBCE	1	235328570	235452443	0.0733	1.2473	0.2123	0.776658	Plasma blood
CTSZ	20	57570240	57582302	0.02636	1.247	0.2125	0.776658	Brain
MOXD1	6	132617194	132722684	0.002615	1.2465	0.21257	0.776658	Brain
CAMKK1	17	3763609	3798185	0.074146	1.2458	0.212849	0.776658	Brain
LILRB1	19	54617158	54638022	0.225319	-1.24482	0.2132	0.776658	Plasma blood
CMC2	16	81009698	81053875	0.30273	-1.24477	0.21322	0.776658	Brain
MST1	3	49683947	49689501	0.444	1.24373	0.2136	0.776658	Plasma blood
HDGF	1	156742109	156766925	0.178	1.2427	0.21398	0.776658	Plasma blood
STON2	14	81727000	81902809	0.063003	1.2434	0.214	0.776658	Brain
GKN2	2	68945232	68952893	0.0949	-1.2402	0.21491	0.777417	Plasma blood
RAPGEF3	12	48128455	48164823	0.029644	-1.24003	0.215	0.777417	Brain
IDH2	15	90626277	90645736	0.03568	1.2398	0.215048	0.777417	Brain
QPCT	2	37571717	37600465	0.105	1.23721	0.216008	0.779873	Brain
SERPINB1	6	2832332	2841959	0.0432	-1.235	0.217	0.782438	Plasma blood
RASA1	5	86563705	86687748	0.131698	1.2272	0.219735	0.786669	Brain
TIPRL	1	168148171	168169950	0.0921	1.22703	0.22	0.786669	Brain
NRSN1	6	24126350	24155128	0.00615	-1.2259	0.22	0.786669	Brain
UBASH3B	11	122655722	122814473	0.049776	1.2271	0.22	0.786669	Plasma blood
PDCD6IP	3	33839844	33911194	0.003465	-1.22621	0.22012	0.786669	Brain
MAPK9	5	180233143	180292099	0.0372	-1.2259	0.2202	0.786669	Plasma blood
VAV1	19	6772708	6857366	0.048077	1.22559	0.2204	0.786669	Plasma blood
SARS2	19	39405906	39440495	0.02899	-1.2252	0.2205	0.786669	Brain
SERPINA5	14	94561442	94593118	0.010214	1.2246	0.22072	0.786669	Plasma blood
DCTD	4	183811213	183839089	0.021315	1.22372	0.2211	0.78691	Brain
OLFM2	19	9853718	9936515	0.313106	-1.22292	0.2214	0.78691	Plasma blood
ADO	10	64564516	64568238	0.231	-1.2221	0.221669	0.78691	Brain
PEBP1	12	118136124	118145584	0.086526	-1.2214	0.22192	0.78691	Plasma blood
NIPA1	15	23043277	23100005	0.06321	1.2179	0.223263	0.790664	Brain
ERAP1	5	96760810	96808100	0.356	1.2153	0.2242	0.791285	Plasma blood
PSG3	19	42721638	42740481	0.259311	1.21519	0.2243	0.791285	Plasma blood
SLC25A10	17	79670404	79688042	0.032838	1.2143	0.224627	0.791285	Brain
CNTN2	1	205012325	205047627	0.0566	-1.21229	0.225	0.791285	Brain
FSTL1	3	120392293	120450993	0.0106	1.21272	0.2252	0.791285	Plasma blood
IFIT5	10	91174343	91180758	0.199	1.21249	0.225325	0.791285	Brain
INHBC	12	57434784	57452062	0.004272	1.2118	0.22559	0.791285	Plasma blood
IL7R	5	35852695	35879603	0.00975	1.2112	0.2258	0.791285	Plasma blood
IL18BP	11	71998613	72005715	0.004719	-1.2111	0.226	0.791285	Plasma blood
PRTFDC1	10	25137536	25241533	0.0839	-1.20968	0.2264	0.791688	Brain
NDUFAF5	20	13765596	13799067	0.04441	1.209	0.2267	0.791741	Brain
PRODH	22	18900294	18924066	0.088554	1.208	0.227	0.791794	Brain
MESDC2	15	80946289	80989828	0.01552	1.2058	0.22789	0.793292	Plasma blood
PPID	4	159630286	159644548	0.340786	1.20551	0.228	0.793292	Brain
PPM1F	22	22273793	22307209	0.033617	-1.2038	0.2287	0.793791	Brain
PHGDH	1	120202421	120286838	0.0678	1.20271	0.229	0.793791	Brain
HOOK1	1	60280458	60342050	0.013	-1.20261	0.229	0.793791	Brain
AKR7A2	1	19303965	19312144	0.0439	1.2011	0.2297	0.795225	Plasma blood
ITIH5	10	7559270	7666998	0.069294	1.1981	0.23088	0.798218	Plasma blood
FAM131B	7	143050493	143059863	0.109	1.1962	0.23163	0.798218	Brain
LGALS3BP	17	78971238	78979947	0.0104	1.19565	0.2318	0.798218	Plasma blood
TDRD7	9	100174232	100258407	0.14099	-1.1961	0.232	0.798218	Brain
SIGLEC12	19	51491227	51501800	0.311978	1.19515	0.232	0.798218	Plasma blood
PIP5K1B	9	71320575	71624092	0.01316	-1.1919	0.233	0.800667	Brain
DGUOK	2	74153953	74186088	0.0844	-1.19094	0.233677	0.80096	Brain
MAPK12	22	50245450	50261716	0.018889	-1.1909	0.23369	0.80096	Plasma blood
DLG1	3	196769431	197026171	0.046943	-1.18867	0.23457	0.80096	Brain
ENG	9	127815013	127854658	0.02918	-1.1873	0.23512	0.80096	Plasma blood
IL11RA	9	34650702	34661902	0.10712	1.1872	0.23514	0.80096	Plasma blood
APOL1	22	36253071	36267530	0.075521	1.1872	0.23516	0.80096	Plasma blood
CTSE	1	206008535	206023909	0.000566	-1.1871	0.23517	0.80096	Plasma blood
PCNT	21	47744036	47865682	0.0207	-1.186	0.23558	0.80096	Brain
TMEM2	9	74298282	74431606	0.00808	1.1855	0.236	0.80096	Brain
SEC14L2	22	30792846	30821305	0.054638	-1.1849	0.2361	0.80096	Brain
PDF	16	69362524	69364498	0.13694	1.18401	0.23641	0.80096	Brain
DEPDC5	22	32149944	32303012	0.039015	1.1829	0.2368	0.80096	Brain
WDR48	3	39093489	39138155	0.012175	1.1828	0.23689	0.80096	Brain
CR2	1	207454230	207489895	0.0093	-1.1813	0.23747	0.80096	Plasma blood
MGAT4B	5	179797597	179806952	0.0968	1.1805	0.2378	0.80096	Plasma blood
ALG11	13	52586534	52603800	0.070376	-1.1803	0.2379	0.80096	Brain
C7	5	40909497	40984643	0.148	-1.1794	0.2382	0.80096	Plasma blood
FGFR1	8	38400215	38468834	0.007566	1.1786	0.23855	0.80096	Plasma blood
LRRC40	1	70610488	70671303	0.0882	-1.1774	0.239	0.80096	Brain
MYCBP	1	39328636	39347289	0.0996	1.17848	0.239	0.80096	Brain
DECR2	16	451826	462487	0.10113	1.17693	0.23922	0.80096	Brain
TNFSF13B	13	108251240	108308484	0.00305	-1.1757	0.23971	0.80096	Plasma blood
TDGF1	3	46574534	46582457	0.481	1.17543	0.2398	0.80096	Plasma blood
PDXK	21	43719094	43762307	0.0136	1.1752	0.24	0.80096	Plasma blood
ASRGL1	11	62104920	62160882	0.285	-1.1731	0.241	0.802548	Brain
GFM1	3	158362067	158410364	0.065524	1.17124	0.2415	0.802548	Brain
CCZ1B	7	6833765	6866401	0.0408	-1.1704	0.24183	0.802548	Brain
CST3	20	23608534	23619110	0.01854	-1.17	0.2419	0.802548	Brain
EOGT	3	69024365	69063112	0.08028	1.16957	0.24217	0.802548	Brain
CXCL12	10	44370165	44386493	0.012705	-1.16852	0.2426	0.802548	Plasma blood
NAV1	1	201592411	201796102	0.0291	-1.16876	0.243	0.802548	Brain
SLK	10	105726959	105788991	0.000331	-1.16696	0.243228	0.802548	Brain
BCAM	19	44809071	44821421	0.038406	-1.16653	0.2434	0.802548	Plasma blood
CPB2	13	46053186	46105033	0.25895	-1.1663	0.24351	0.802548	Plasma blood
RSU1	10	16632610	16859527	0.0488	1.16529	0.2439	0.802548	Brain
MLLT4	6	168227602	168372703	0.001012	-1.1652	0.24394	0.802548	Brain
SEPT4	17	56597611	56618179	0.016059	-1.1618	0.245299	0.805479	Brain
STAU1	20	47729878	47804904	0.03463	1.161	0.2456	0.805479	Brain
COG6	13	40229764	40365802	0.015536	-1.161	0.2457	0.805479	Brain
TREM2	6	41158506	41163186	0.04849	-1.16008	0.24601	0.805545	Plasma blood
EFNA4	1	155063737	155069553	0.00365	1.1578	0.24696	0.806368	Plasma blood
STX4	16	31044210	31054296	0.01814	1.15765	0.24701	0.806368	Brain
ATXN3	14	92044496	92106621	0.155344	-1.1572	0.2472	0.806368	Plasma blood
EPHA2	1	16124337	16156069	0.0644	1.1556	0.24783	0.806368	Plasma blood
TTC5	14	20724717	20774153	0.159669	1.15414	0.248	0.806368	Brain
ASPH	8	61500556	61714640	0.025757	-1.1551	0.24804	0.806368	Plasma blood
CNTFR	9	34551432	34590140	0.0362	1.1542	0.24843	0.806368	Plasma blood
TLR1	4	38790677	38856817	0.033485	1.15295	0.2489	0.806368	Plasma blood
ISLR2	15	74392652	74430881	0.00981	1.1524	0.249155	0.806368	Brain
OMG	17	29599031	29624557	0.042119	-1.1524	0.249162	0.806368	Brain
MOGS	2	74688184	74692537	0.0394	1.15023	0.250048	0.808295	Brain
TLDC1	16	84511681	84587639	0.13206	1.14939	0.25039	0.80846	Brain
SEC24C	10	75504120	75531919	0.025	1.14713	0.251329	0.808843	Brain
HDDC2	6	125541108	125623282	0.534145	-1.146	0.25181	0.808843	Brain
ADSS	1	244571796	244615436	0.0481	-1.14482	0.252	0.808843	Brain
REXO2	11	114310108	114321001	0.00713	-1.1445	0.252	0.808843	Brain
GIMAP4	7	150264365	150271041	0.164	-1.1441	0.25257	0.808843	Brain
SAA4	11	18231355	18236802	0.164993	-1.1433	0.253	0.808843	Plasma blood
CST2	20	23823769	23826729	0.100253	-1.14271	0.253	0.808843	Plasma blood
CD8A	2	86784610	86808396	0.07079	1.1424	0.25329	0.808843	Plasma blood
COL11A2	6	33162681	33192499	0.0647	-1.14161	0.25362	0.808843	Plasma blood
HARS2	5	140071011	140078889	-0.000466	-1.1412	0.253789	0.808843	Brain
CALCOCO2	17	48831018	48866522	0.02	-1.14121	0.2538	0.808843	Plasma blood
FAF1	1	50905150	51425935	0.0752	-1.14065	0.254	0.808843	Brain
LYPD3	19	43460787	43465608	0.011615	1.13995	0.2543	0.808872	Plasma blood
LRRC8A	9	131644391	131680318	0.04554	1.1382	0.255	0.809145	Brain
PDCD5	19	32581190	32587453	0.212807	-1.13795	0.2551	0.809145	Plasma blood
CHST12	7	2403588	2448484	0.041019	1.1373	0.2554	0.809145	Plasma blood
LEFTY2	1	225936598	225941383	0.259	-1.137	0.25555	0.809145	Plasma blood
UMPS	3	124449213	124464040	0.356653	1.13543	0.2562	0.81028	Brain
ADCK1	14	78266426	78401355	0.211447	1.13354	0.257	0.81147	Brain
LRIG1	3	66429221	66551687	0.012404	-1.13312	0.25716	0.81147	Brain
FCRL4	1	157573747	157598085	0.264	1.1304	0.25829	0.812961	Plasma blood
ADSL	22	40742507	40786467	0.11848	-1.1304	0.2583	0.812961	Brain
AMY1A	1	103655760	103664554	0.037	1.1299	0.25851	0.812961	Plasma blood
CD5L	1	157830911	157898256	0.068	-1.129	0.25891	0.813299	Plasma blood
SEPW1	19	47778585	47784686	0.04195	-1.12739	0.2596	0.813964	Plasma blood
ACADM	1	76190036	76253260	0.242	1.12625	0.26	0.813964	Brain
MMP13	11	102942995	102955732	0.00661	1.1261	0.26	0.813964	Plasma blood
CES1	16	55802851	55833337	0.01814	-1.12413	0.26096	0.815258	Plasma blood
FKBP1A	20	1349622	1373806	0.03147	1.124	0.261	0.815258	Brain
CTNNAL1	9	111704851	111775809	0.03273	1.1202	0.263	0.820581	Brain
ADAM23	2	206443532	206621127	0.11445	-1.1184	0.2634	0.820581	Plasma blood
GUCA2B	1	42153410	42155820	0.00965	1.1171	0.26393	0.820581	Plasma blood
PANK4	1	2439972	2458039	0.0372	-1.11803	0.264	0.820581	Brain
CCDC92	12	124403207	124457378	0.103275	1.11387	0.2653	0.820581	Brain
MTIF3	13	27435643	27450591	0.00628	1.1133	0.26556	0.820581	Plasma blood
NUCB1	19	48900312	48923372	0.031031	1.11214	0.2661	0.820581	Plasma blood
DHODH	16	72042487	72058954	0.2707	1.11085	0.26663	0.820581	Brain
SFRP4	7	37905932	38025695	0.029307	1.1089	0.26749	0.820581	Plasma blood
DGKA	12	56321103	56347811	0.012563	1.10894	0.2675	0.820581	Brain
EPHA10	1	37713880	37765133	0.00785	1.1079	0.26789	0.820581	Plasma blood
ACY1	3	51983340	51989197	0.0106	-1.10771	0.268	0.820581	Plasma blood
RLBP1	15	89753100	89764982	0.22563	1.107	0.268296	0.820581	Brain
DPT	1	168695468	168729206	0.0913	1.1064	0.26857	0.820581	Plasma blood
EFR3A	8	132916335	133025889	0.05763	-1.1059	0.2688	0.820581	Brain
TREX1	3	48506445	48509044	0.153356	1.10554	0.26892	0.820581	Brain
CD36	7	80369575	80679277	0.000675	-1.1042	0.26949	0.820581	Plasma blood
IL5RA	3	3066324	3126613	0.06	1.10303	0.27	0.820581	Plasma blood
FLNC	7	128470431	128499328	0.00315	1.1028	0.27011	0.820581	Brain
C1QTNF9	13	24307166	24322535	0.04961	-1.1024	0.27028	0.820581	Plasma blood
RAB3B	1	52373628	52456436	0.0297	-1.1012	0.271	0.820581	Brain
NDUFB2	7	140390577	140422590	0.000945	-1.1006	0.27108	0.820581	Brain
CACNA2D1	7	81575760	82073114	0.0627	1.0992	0.27168	0.820581	Brain
TPT1	13	45333471	45341284	0.00546	1.0987	0.27191	0.820581	Plasma blood
LRP4	11	46856717	46918642	0.101858	-1.099	0.272	0.820581	Plasma blood
MRVI1	11	10573091	10693988	0.021385	-1.0976	0.272	0.820581	Plasma blood
TESC	12	117476728	117537284	0.084934	-1.09523	0.2734	0.820581	Brain
SERPINA11	14	94442464	94452800	0.030851	1.0948	0.2736	0.820581	Plasma blood
CLYBL	13	100258919	100549387	0.489463	-1.0944	0.2738	0.820581	Brain
CD97	19	14380501	14408725	0.00351	1.09402	0.2739	0.820581	Plasma blood
BMP1	8	22165140	22212326	0.008018	1.0931	0.27433	0.820581	Plasma blood
RAB3IP	12	70132461	70216984	0.042859	-1.09295	0.2744	0.820581	Brain
ALDH16A1	19	49956426	49974305	0.2655	1.093	0.2744	0.820581	Brain
LSM6	4	147096837	147121152	0.057467	1.09279	0.2745	0.820581	Brain
RANGAP1	22	41641615	41682255	0.023576	1.092	0.2748	0.820581	Brain
BAIAP3	16	1383602	1399439	0.14027	-1.09086	0.27533	0.820581	Brain
ANKLE2	12	133302254	133338474	0.026051	-1.09077	0.2754	0.820581	Brain
IMPAD1	8	56957931	56993867	0.105474	1.0896	0.27589	0.820581	Plasma blood
SPHK1	17	76376584	76387860	0.0102	1.08943	0.276	0.820581	Plasma blood
GSTT2B	22	24299601	24303373	0.491597	-1.0889	0.2762	0.820581	Brain
FCGR3B	1	161623196	161631963	0.0923	1.0881	0.27654	0.820581	Plasma blood
CTSD	11	1773982	1785222	0.001	-1.0871	0.277	0.820581	Brain
CXADR	21	18884700	18965897	0.015	-1.086	0.27767	0.820581	Brain
ADI1	2	3501132	3523507	0.0305	-1.08486	0.277983	0.820581	Brain
GPR37L1	1	202091986	202102720	0.0503	-1.08478	0.278	0.820581	Brain
HSPA13	21	15743436	15755805	0.00653	1.084	0.27832	0.820581	Brain
ADAMTSL2	9	133532164	133575519	0.00162	-1.0839	0.27839	0.820581	Plasma blood
TAOK3	12	118587606	118810750	0.030189	-1.08364	0.2785	0.820581	Brain
HEXDC	17	80376194	80400521	0.057944	1.0834	0.278639	0.820581	Brain
AMZ2	17	66243715	66253297	0.453294	1.0829	0.278833	0.820581	Brain
FAH	15	80444832	80479288	0.19287	1.082	0.279266	0.820581	Brain
PF4	4	73980811	73982027	0.016767	1.08148	0.2795	0.820581	Plasma blood
PBLD	10	70042417	70092806	0.331	-1.08054	0.279904	0.820581	Brain
SERPINA3	14	94612384	94624055	0.017954	1.0805	0.27994	0.820581	Plasma blood
KSR1	17	25783670	25953461	-0.002623	-1.0804	0.279953	0.820581	Brain
SHMT1	17	18231187	18266856	0.369133	-1.0798	0.28023	0.820581	Brain
CLGN	4	141309609	141349122	0.175053	1.0795	0.2804	0.820581	Brain
KATNAL1	13	30776767	30881621	0.003434	1.0791	0.2805	0.820581	Brain
NUDT5	10	12165330	12196144	0.00191	1.07835	0.28088	0.820581	Plasma blood
RAPH1	2	204259068	204400133	-0.00237	1.07823	0.28093	0.820581	Brain
HAVCR1	5	157029413	157059119	0.0867	-1.078	0.2811	0.820581	Plasma blood
HBS1L	6	135281516	135424194	0.178506	-1.0778	0.28112	0.820581	Brain
FGF2	4	122826708	122898236	0.021284	1.07744	0.2813	0.820581	Plasma blood
TNFAIP6	2	151357592	151380046	0.10268	1.0742	0.28271	0.823229	Plasma blood
TMEM190	19	55376826	55378246	0.342338	1.07413	0.2828	0.823229	Plasma blood
TEK	9	27109141	27230174	0.06059	1.0725	0.2835	0.823833	Plasma blood
MRPL1	4	78783674	78873944	0.130032	1.07231	0.2836	0.823833	Brain
CCL23	17	36013056	36017972	0.0712	1.07156	0.2839	0.823843	Plasma blood
TBCD	17	80709940	80900724	0.110287	-1.0692	0.284968	0.825313	Brain
THEM4	1	151846060	151882284	0.338	1.06882	0.285	0.825313	Brain
ACOT11	1	55007930	55104865	0.314	-1.06672	0.286	0.826328	Brain
RAB2A	8	60516936	60623644	0.000111	-1.0662	0.28633	0.826328	Plasma blood
NFXL1	4	47849257	47916653	0.102928	-1.06591	0.2865	0.826328	Brain
NOS1	12	117645947	117889975	0.00991	1.06464	0.287	0.826328	Brain
THSD7A	7	11409984	11871824	0.00705	1.0645	0.28709	0.826328	Brain
MTPAP	10	30598730	30663377	0.188	1.06443	0.287134	0.826328	Brain
CHRDL2	11	74696429	74731426	0.044891	-1.0598	0.289	0.827949	Plasma blood
ALDH2	12	112204691	112247782	0.052891	-1.05945	0.2894	0.827949	Brain
SELPLG	12	108621895	108633894	0.038126	-1.0592	0.28953	0.827949	Plasma blood
PAG1	8	81880045	82024303	0.145625	1.0586	0.2898	0.827949	Brain
KIR2DL3	19	54738513	54753052	0.018237	-1.05864	0.2898	0.827949	Plasma blood
HRAS	11	532242	537287	0.0528	-1.057	0.29	0.827949	Brain
MLEC	12	121124672	121139667	0.0392	-1.05813	0.29	0.827949	Brain
DIP2A	21	47878812	47989926	0.015596	-1.058	0.29008	0.827949	Brain
FYCO1	3	45959396	46037316	0.0567	1.05706	0.29048	0.82824	Brain
ADM	11	10305073	10307397	0.000331	-1.0551	0.291	0.828873	Plasma blood
MCCC1	3	182733006	182833863	0.031528	1.05395	0.2919	0.829141	Brain
GABRB1	4	46995740	47428461	0.29033	1.05405	0.2919	0.829141	Brain
PDLIM2	8	22435792	22455538	0.031783	-1.0533	0.2922	0.829141	Brain
CCL17	16	57404767	57416063	0.04	1.05198	0.29281	0.829141	Plasma blood
H1F0	22	38201114	38203442	0.11427	-1.0515	0.293	0.829141	Brain
FCN2	9	134880810	134887523	0.10512	1.051	0.29324	0.829141	Plasma blood
MAP3K3	17	63622415	63696305	0.000625	-1.05076	0.2934	0.829141	Plasma blood
RAB40C	16	639357	679272	0.001011	1.05053	0.29348	0.829141	Brain
ITGA1	5	52083730	52255040	0.02481	1.0495	0.293959	0.829651	Brain
MAN1C1	1	25616791	25786206	0.0433	1.0481	0.29458	0.830061	Plasma blood
EFCAB7	1	63989043	64038364	0.003509	-1.04718	0.295	0.830061	Brain
B3GNT8	19	41425359	41428730	0.331504	1.04718	0.295	0.830061	Plasma blood
TAPBPL	12	6451690	6466517	0.485497	-1.0459	0.29561	0.830936	Plasma blood
PROK2	3	71771655	71785206	0.17	1.04112	0.2978	0.832468	Plasma blood
HDHD3	9	116135699	116139279	0.003149	1.04	0.298	0.832468	Brain
APOC1	19	44914247	44919349	0.02889	1.03944	0.2986	0.832468	Plasma blood
BLMH	17	28575218	28619074	0.16667	1.0391	0.298762	0.832468	Brain
FSCN1	7	5632439	5646286	0.001362	1.0388	0.29891	0.832468	Brain
RAD23B	9	110045418	110094475	0.0153	-1.0383	0.299	0.832468	Brain
SLIT2	4	20251905	20620561	0.009457	1.03833	0.2991	0.832468	Plasma blood
COMTD1	10	76993727	76995788	0.00268	1.0381	0.299222	0.832468	Brain
BDH1	3	197236654	197300194	0.030595	1.03618	0.30012	0.832468	Brain
ARMC9	2	232063260	232239548	0.238802	-1.03596	0.300222	0.832468	Brain
OPALIN	10	98102973	98119092	0.0253	-1.03562	0.300377	0.832468	Brain
C2orf76	2	120059801	120124404	0.0262	1.03496	0.300687	0.832468	Brain
TMEFF1	9	100473149	100577636	0.01112	1.0347	0.30083	0.832468	Plasma blood
NKIRAS1	3	23933151	23988082	0.201	1.03385	0.30121	0.832468	Brain
LUM	12	91102629	91111494	0.014368	-1.0332	0.30152	0.832468	Plasma blood
TMEM173	5	138855119	138862520	0.009678	-1.0326	0.30179	0.832468	Brain
GPX4	19	1103936	1106787	0.142731	-1.0324	0.3019	0.832468	Brain
GAK	4	843064	926161	0.19984	-1.03243	0.3019	0.832468	Brain
CYB5R2	11	7665100	7677222	0.129922	-1.0332	0.302	0.832468	Plasma blood
SPR	2	73114489	73119287	0.03538	1.03185	0.302144	0.832468	Brain
FAM118B	11	126081309	126132881	0.0413	-1.0305	0.303	0.834	Brain
DNAJB1	19	14625582	14640582	0.0206	-1.029	0.3035	0.834	Brain
ACE	17	63477061	63498380	0.281	-1.02874	0.3036	0.834	Plasma blood
GABARAPL2	16	75566375	75577881	0.01852	1.02767	0.30411	0.834071	Plasma blood
WDR41	5	76721795	76916436	0.03584	-1.0274	0.304226	0.834071	Brain
FAS	10	90750414	90775542	0.061075	-1.02643	0.304688	0.834192	Brain
PON1	7	94926988	95025673	0.619	-1.0261	0.30487	0.834192	Brain
SERPINE1	7	101127104	101139247	0.016395	1.025	0.30538	0.834649	Plasma blood
APOBEC3G	22	39077067	39087743	0.017729	1.0244	0.30566	0.834649	Plasma blood
RTN4R	22	20241415	20283246	0.061152	-1.0238	0.30595	0.834649	Plasma blood
DUT	15	48623208	48635570	0.141	1.0231	0.306238	0.834649	Brain
KCTD5	16	2732476	2759031	0.02586	-1.02198	0.30679	0.835334	Brain
CYP4F11	19	16023177	16045677	0.05782	-1.0203	0.3076	0.835626	Brain
TNC	9	115019575	115118257	0.36783	-1.0203	0.30761	0.835626	Plasma blood
LSP1	11	1874200	1913497	0.0669	1.0189	0.308	0.835626	Brain
IST1	16	71879899	71962913	0.14	-1.0192	0.30811	0.835626	Brain
KLK15	19	50825289	50837213	0.01775	1.01849	0.3084	0.835626	Plasma blood
INPP4A	2	99061317	99210853	0.02886	1.01761	0.308865	0.836028	Brain
IFNLR1	1	24154168	24187959	0.0167	1.017	0.30915	0.836028	Plasma blood
ELP2	18	33709407	33757909	0.0431	-1.015	0.31026	0.838215	Brain
ABCG1	21	43619799	43717354	0.090064	1.013	0.31128	0.838566	Brain
CYB5R3	22	43013846	43045574	0.0306	-1.0125	0.3113	0.838566	Brain
S100B	21	48018875	48025121	0.18226	-1.012	0.31148	0.838566	Brain
CAB39L	13	49882786	50018262	0.0649	-1.0107	0.3121	0.838566	Brain
SCG3	15	51681492	51721026	0.23798	1.0107	0.31214	0.838566	Plasma blood
WDR17	4	176986985	177103978	0.370612	1.01064	0.3122	0.838566	Brain
NAGK	2	71291474	71306935	0.054605	-1.00991	0.312536	0.838658	Brain
SCRN1	7	29959719	30029905	0.0472	-1.009	0.31296	0.838986	Brain
CDC42BPB	14	103398716	103523799	0.0321	-1.00664	0.314	0.840796	Brain
TMA7	3	48481667	48485616	0.030647	1.00636	0.31424	0.840796	Brain
MPZ	1	161274525	161279762	0.138	1.00423	0.315	0.84121	Brain
PRMT3	11	20409076	20530840	0.397	-1.0045	0.315	0.84121	Brain
PROC	2	127418427	127429242	0.02481	1.0032	0.31577	0.841608	Plasma blood
ETFA	15	76507696	76603813	0.00182	-1.0028	0.31597	0.841608	Brain
TBCB	19	36114289	36125947	0.053681	1.00207	0.3163	0.841608	Plasma blood
AGER	6	32180968	32184322	0.04918	-1.00196	0.31636	0.841608	Plasma blood
RNH1	11	494512	507300	0.10443	1.0012	0.317	0.842045	Brain
DPEP2	16	67987394	68000586	0.02773	-1.00037	0.31713	0.842045	Plasma blood
SUSD2	22	24577227	24585078	0.263	0.9968	0.3189	0.845057	Brain
SPOCK3	4	166733384	167234796	0.224187	0.99653	0.319	0.845057	Plasma blood
HAVCR2	5	157085832	157142869	0.274	0.9955	0.3195	0.845057	Plasma blood
VTA1	6	142147162	142224685	0.03434	-0.99521	0.31963	0.845057	Plasma blood
VPS13C	15	62144588	62352672	0.070578	-0.9947	0.319878	0.845057	Brain
NDUFA6	22	42481529	42486959	0.05047	0.9931	0.3207	0.845057	Brain
ADSSL1	14	104724229	104747325	0.005586	0.9928	0.32081	0.845057	Plasma blood
PPCDC	15	75315896	75409803	0.104117	0.9924	0.320995	0.845057	Brain
CRYL1	13	20977806	21099996	0.01946	0.9925	0.321	0.845057	Brain
PTPLAD1	15	65822756	65870687	-0.000451	0.9905	0.321942	0.846735	Brain
OXLD1	17	79632066	79633665	0.01356	-0.9897	0.322316	0.846863	Brain
ADH7	4	99412261	99435510	0.035284	0.98923	0.3226	0.846863	Plasma blood
NOP9	14	24769068	24778330	0.012932	-0.98752	0.323	0.847113	Brain
LYRM9	17	26205340	26221778	0.038024	-0.9869	0.323686	0.847118	Brain
PSMG1	21	40546695	40555777	0.338118	-0.987	0.32378	0.847118	Brain
IMPA1	8	81656914	81686331	0.007294	-0.9858	0.32421	0.847118	Plasma blood
GFRA1	10	116056925	116276803	0.046093	-0.98562	0.32432	0.847118	Plasma blood
JAM2	21	27011584	27089874	0.0108	0.985	0.32459	0.847118	Brain
UST	6	148747030	149076990	0.009	0.98457	0.32483	0.847118	Plasma blood
NID2	14	52004803	52069228	0.125698	0.9828	0.32573	0.847355	Plasma blood
SDF4	1	1152288	1167411	0.0996	-0.98182	0.326	0.847355	Brain
EHD1	11	64619114	64655768	0.0597	-0.9825	0.326	0.847355	Brain
PTN	7	137227341	137343774	0.040897	0.9809	0.32666	0.847355	Plasma blood
ANGPT2	8	6499632	6563409	0.021563	-0.9807	0.32674	0.847355	Plasma blood
QRSL1	6	107077453	107116292	-0.00242	0.9807	0.32675	0.847355	Brain
NCR3	6	31588895	31593006	0.06555	0.97908	0.32754	0.847745	Plasma blood
WDFY1	2	224720433	224810104	0.043567	-0.97886	0.327648	0.847745	Brain
ADAMTS5	21	26917922	26967088	0.22635	-0.9789	0.328	0.847745	Plasma blood
FAM19A5	22	48489553	48850912	0.001842	0.9769	0.32861	0.847745	Plasma blood
GSKIP	14	96829814	96853625	0.0182	0.97527	0.329	0.847745	Brain
TPI1	12	6867119	6870948	0.051657	0.9757	0.3292	0.847745	Plasma blood
GDAP2	1	118406107	118472253	0.037546	0.97507	0.33	0.847745	Brain
CCDC91	12	28286182	28732883	0.0216	0.97383	0.3301	0.847745	Brain
PLG	6	160702238	160754097	0.07847	0.97348	0.33031	0.847745	Plasma blood
PNLIPRP2	10	116620953	116645143	0.36881	-0.97319	0.33046	0.847745	Plasma blood
TIMM21	18	71815746	71826197	0.077475	0.972	0.33089	0.847745	Brain
PPP1R14C	6	150464212	150571493	0.180728	0.9718	0.33115	0.847745	Brain
CLEC12A	12	9951316	9995694	0.529498	0.9703	0.33188	0.847745	Plasma blood
ANKRD16	10	5903580	5931869	0.001799	0.9695	0.332295	0.847745	Brain
PEAR1	1	156893698	156916429	0.0459	0.9689	0.33258	0.847745	Plasma blood
C17orf80	17	71228372	71245091	0.125	0.9685	0.332784	0.847745	Brain
COA1	7	43648055	43769316	0.033545	0.9675	0.33329	0.847745	Brain
PSMB1	6	170535120	170553307	0.13249	-0.96597	0.33406	0.847745	Plasma blood
PIGR	1	206928522	206946466	0.0189	-0.9654	0.33433	0.847745	Plasma blood
NFX1	9	33290509	33371155	0.0265	-0.9632	0.335	0.847745	Brain
F2	11	46719196	46739506	0.031647	-0.9647	0.335	0.847745	Plasma blood
SHC1	1	154962298	154974395	0.00298	-0.9629	0.33558	0.847745	Plasma blood
MXRA7	17	74668633	74707098	0.115338	0.9627	0.335707	0.847745	Brain
GLRA3	4	175558065	175750465	0.030884	-0.96259	0.3358	0.847745	Brain
SFRP1	8	41261962	41309473	0.020698	-0.9623	0.3359	0.847745	Plasma blood
RRM1	11	4115937	4160106	0.001612	0.9624	0.336	0.847745	Brain
TXNL4A	18	77732867	77793949	0.0139	-0.962	0.33606	0.847745	Brain
BOC	3	113211003	113287459	0.0336	0.96165	0.3362	0.847745	Plasma blood
FRZB	2	182833275	182866637	0.08248	-0.9617	0.33622	0.847745	Plasma blood
RAB3C	5	57878048	58155213	0.033655	-0.9607	0.336719	0.847745	Brain
PPIL1	6	36822603	36842800	0.088471	-0.9603	0.33692	0.847745	Brain
C2CD2L	11	118972908	118989252	0.211809	-0.9611	0.337	0.847745	Brain
PLAU	10	73909177	73917496	0.062128	-0.95957	0.33727	0.847745	Plasma blood
TXNDC5	6	7881517	7910788	0.03401	-0.95952	0.3373	0.847745	Plasma blood
GRID1	10	87359312	88126250	0.116	-0.9588	0.337658	0.847745	Brain
SCRN2	17	45915058	45918699	0.14	-0.9578	0.338156	0.847745	Brain
GDPGP1	15	90777040	90785315	0.115976	-0.9578	0.338183	0.847745	Brain
ANXA4	2	69644425	69827112	0.08322	-0.955	0.33957	0.848345	Plasma blood
SORD	15	45315302	45369383	0.39632	-0.955	0.339592	0.848345	Brain
LECT2	5	135922279	135954983	0.231	-0.9543	0.3399	0.848345	Plasma blood
EXOC6B	2	72403113	73053170	0.00499	0.95427	0.339947	0.848345	Brain
IL1RN	2	113107214	113134016	0.06882	0.9535	0.34032	0.848345	Plasma blood
RABGGTB	1	76251879	76260764	0.00219	-0.95244	0.341	0.848345	Brain
ATG2B	14	96747595	96830207	0.024	0.95288	0.341	0.848345	Brain
MICA	6	31399784	31415315	0.33362	0.95178	0.34121	0.848345	Plasma blood
GYS1	19	49471382	49496567	0.054537	-0.9515	0.3413	0.848345	Brain
GSTM4	1	110198703	110208118	0.06678	0.95086	0.342	0.848345	Brain
ARSB	5	78073032	78281910	0.0457	-0.9497	0.342276	0.848345	Brain
CDCP1	3	45082277	45146422	0.0389	-0.94904	0.3426	0.848345	Plasma blood
DCUN1D2	13	114110134	114145267	0.280364	0.9487	0.3428	0.848345	Brain
PAFAH1B2	11	117014983	117047610	0.018788	0.9483	0.343	0.848345	Brain
IKBKAP	9	111629797	111696396	0.0109	-0.9477	0.343	0.848345	Brain
CCL8	17	34319435	34321402	0.344	-0.947543	0.3434	0.84858	Plasma blood
NCK2	2	105744912	105894274	0.008	0.9451	0.34463	0.849513	Plasma blood
NEK7	1	198156994	198322420	0.0189	0.9447	0.34481	0.849513	Plasma blood
SCRG1	4	174305852	174327531	0.02354	-0.9445	0.3449	0.849513	Brain
CD59	11	33703010	33736479	0.066144	0.9437	0.345	0.849513	Plasma blood
LGALS4	19	38801671	38812945	0.037901	-0.94329	0.3455	0.849991	Plasma blood
AMPD3	11	10329860	10529126	0.208888	0.9432	0.346	0.850194	Brain
TPST1	7	66205317	66420543	0.054094	0.9418	0.34628	0.850194	Plasma blood
ABHD12	20	25275379	25371619	0.137	-0.941	0.3465	0.850194	Brain
PGS1	17	76374721	76421195	0.14413	0.9394	0.347513	0.850871	Brain
SCUBE1	22	43197280	43343372	0.013685	-0.939	0.34771	0.850871	Plasma blood
PFAS	17	8150936	8173809	0.092092	-0.9386	0.347938	0.850871	Brain
S100A4	1	153516089	153522612	0.270407	0.93787	0.348	0.850871	Brain
CTBS	1	85015289	85040163	0.034	0.93565	0.349	0.852566	Brain
LILRA4	19	54333185	54339162	0.07329	0.93537	0.3496	0.853282	Plasma blood
CAMK1G	1	209757062	209787283	0.0401	-0.93396	0.35	0.853509	Brain
EPB41L2	6	131160487	131384462	0.0557	-0.9323	0.35121	0.854287	Brain
ANXA11	10	80150889	80205572	0.190279	0.93222	0.35122	0.854287	Plasma blood
PVR	19	45147098	45166850	0.013447	0.9319	0.3514	0.854287	Brain
PCDH9	13	66302834	67230445	0.00483	0.9311	0.3518	0.854287	Plasma blood
MANBA	4	102630770	102760994	0.212453	0.93019	0.3523	0.854287	Plasma blood
PRSS8	16	31131433	31135727	0.00544	0.92945	0.35266	0.854287	Plasma blood
DUSP3	17	41843489	41856356	0.08955	-0.9286	0.35312	0.854287	Brain
DIS3L2	2	232825955	233209060	0.003545	-0.92781	0.353506	0.854287	Brain
SURF1	9	136218610	136223552	0.00817	-0.9272	0.354	0.854287	Brain
TMEM33	4	41937137	41962589	0.20966	0.92606	0.3544	0.854287	Brain
TREML2	6	41189749	41201149	0.11822	0.92599	0.35445	0.854287	Plasma blood
CBR4	4	169784921	169931426	0.028198	-0.9256	0.3547	0.854287	Brain
TIRAP	11	126283065	126298845	0.08606	0.9253	0.355	0.854287	Plasma blood
CCM2	7	45039074	45116068	0.072802	0.9249	0.35502	0.854287	Brain
LNPEP	5	96271098	96373219	-0.000128	0.9239	0.355544	0.854287	Brain
COA4	11	73583712	73588033	0.067663	-0.9237	0.356	0.854287	Brain
PACAP	5	139387467	139390081	0.00313	0.9229	0.3561	0.854287	Plasma blood
STXBP5L	3	120626919	121143608	0.00634	0.92149	0.3568	0.854287	Brain
YWHAB	20	44885702	44908532	0.322603	-0.921874	0.357	0.854287	Plasma blood
LBP	20	38346482	38377013	0.216406	0.920561	0.357	0.854287	Plasma blood
LAMC2	1	183186238	183245127	0.215	-0.9193	0.35794	0.854287	Plasma blood
CAT	11	34438934	34472060	0.042283	0.9187	0.358	0.854287	Plasma blood
ADHFE1	8	67342420	67383836	0.006723	0.9186	0.3583	0.854287	Brain
AMPD2	1	109616104	109632051	0.00254	0.9185	0.35837	0.854287	Plasma blood
SIGLEC9	19	51124906	51136651	0.525008	-0.91831	0.3585	0.854287	Plasma blood
SLC25A15	13	41363548	41384247	0.4124	-0.918	0.3586	0.854287	Brain
ACBD5	10	27484146	27531059	0.136169	-0.91771	0.358772	0.854287	Brain
TLR3	4	186069155	186088073	0.255351	0.91703	0.3591	0.854287	Plasma blood
HSD17B12	11	43577986	43878167	0.0883	0.9159	0.36	0.854287	Brain
P2RX7	12	121570622	121623876	0.187	0.91503	0.3602	0.854287	Brain
CRYZL1	21	34961647	35016232	0.4334	-0.915	0.36038	0.854287	Brain
MRI1	19	13875346	13885096	0.0506	0.9146	0.3604	0.854287	Brain
SLC2A5	1	9095166	9148537	0.31014	-0.91304	0.361	0.854287	Brain
TPP1	11	6634000	6640692	-0.0022	0.9139	0.361	0.854287	Brain
CNPY2	12	56703626	56710120	0.0308	0.91217	0.3617	0.854287	Brain
ACO1	9	32384618	32454767	0.113602	-0.9103	0.363	0.854287	Brain
INPP1	2	191208196	191236391	0.11016	-0.90941	0.363135	0.854287	Brain
ADCK4	19	40691514	40725784	0.000213	0.9087	0.3635	0.854287	Plasma blood
ANTXR2	4	79901146	80125454	0.047723	-0.90839	0.3637	0.854287	Plasma blood
PIH1D1	19	49949555	49956754	0.111	-0.908	0.3639	0.854287	Brain
NIF3L1	2	201754050	201768655	0.03356	0.90763	0.364074	0.854287	Brain
ME1	6	83920108	84140797	0.0284	0.9068	0.36451	0.854287	Brain
BNIP1	5	172571445	172591390	0.082502	0.9067	0.364555	0.854287	Brain
NRP1	10	33466420	33625190	0.264224	0.90669	0.36457	0.854287	Brain
NUDT2	9	34329506	34343711	0.27336	-0.9063	0.36478	0.854287	Plasma blood
ALDH1B1	9	38392661	38398658	0.063	0.905	0.365	0.854287	Brain
NMT2	10	15102584	15168693	0.024348	0.90581	0.36504	0.854287	Plasma blood
TAC1	7	97732084	97740472	0.019149	-0.9048	0.36559	0.854287	Plasma blood
OSBPL11	3	125247702	125313934	0.33342	-0.90321	0.36641	0.854287	Brain
THRAP3	1	36690017	36770958	0.046562	0.90134	0.367	0.854287	Brain
PLCB1	20	8112824	8949003	0.0555	-0.902	0.367	0.854287	Brain
HAGH	16	1845621	1877195	0.00146	0.901156	0.36751	0.854287	Brain
CAST	5	95860971	96115299	0.30768	-0.9	0.3681	0.854287	Brain
GDI2	10	5807186	5884095	0.130009	-0.89974	0.368261	0.854287	Brain
GP6	19	55013705	55038264	0.30436	0.89963	0.3683	0.854287	Plasma blood
EGFR	7	55086714	55324313	0.0646	-0.8989	0.36871	0.854287	Brain
PHF3	6	64345725	64489229	0.00489	-0.8985	0.3689	0.854287	Brain
THTPA	14	24025216	24029480	0.039856	0.89802	0.369	0.854287	Brain
ROR1	1	63774017	64181498	0.122	0.8968	0.36983	0.854287	Plasma blood
PILRA	7	100367530	100400096	0.515673	-0.8966	0.36994	0.854287	Plasma blood
BTN3A3	6	26440700	26453643	0.036855	-0.8964	0.37	0.854287	Brain
KIAA1211L	2	99410309	99552722	0.08928	0.89624	0.370124	0.854287	Brain
NADK2	5	36192694	36242381	0.00759	-0.8959	0.370282	0.854287	Brain
SRA1	5	139916925	139937895	0.001951	0.8951	0.370709	0.854287	Brain
SSTR2	17	71161151	71167185	0.031763	0.8948	0.370869	0.854287	Brain
BTN2A1	6	26458150	26476849	0.004408	0.8942	0.371	0.854287	Brain
PPA2	4	106290234	106395238	0.3309	0.89355	0.3716	0.854287	Brain
PRSS57	19	685546	695498	0.055174	0.89348	0.3716	0.854287	Plasma blood
NEK4	3	52744800	52804965	0.07124	0.89345	0.37162	0.854287	Brain
KYNU	2	142877657	143055833	0.22066	0.8931	0.37183	0.854287	Plasma blood
SPINK4	9	33218365	33248567	0.16432	0.8914	0.3727	0.855579	Plasma blood
ACADS	12	121163538	121177811	0.133039	-0.88977	0.3736	0.856689	Brain
ISOC2	19	55964352	55973710	0.05146	0.8894	0.3738	0.856689	Brain
GSTP1	11	67583742	67586656	0.153121	-0.8871	0.375	0.85859	Plasma blood
GPD1	12	50103982	50111313	0.003378	-0.8864	0.37539	0.85859	Plasma blood
TCN1	11	59852800	59866489	0.054065	0.8861	0.376	0.85859	Plasma blood
RTFDC1	20	55043647	55093943	0.05878	0.885	0.3762	0.85859	Brain
PDIA4	7	148700154	148725733	0.23536	-0.8849	0.37622	0.85859	Brain
CREG1	1	167529117	167553805	0.0285	0.8841	0.37664	0.85859	Plasma blood
TMEM229A	7	123670973	123673523	0.226	0.8834	0.37702	0.85859	Brain
SERPINF2	17	1742836	1755265	0.0307	-0.883335	0.3771	0.85859	Plasma blood
CYP4X1	1	47427036	47516423	0.0749	0.88177	0.378	0.859124	Brain
PPP2R2A	8	26149007	26230196	0.0289	-0.8811	0.3782	0.859124	Brain
MYH14	19	50691443	50813802	0.04682	0.8809	0.3784	0.859124	Brain
ACAN	15	88803436	88875353	0.00803	0.8805	0.3786	0.859124	Plasma blood
FBLN1	22	45502238	45601135	0.035791	0.88	0.37888	0.859124	Plasma blood
LONP1	19	5691845	5720583	0.04364	-0.8779	0.38	0.859609	Brain
AMBP	9	114060127	114078328	0.00813	-0.8778	0.38005	0.859609	Plasma blood
CD2AP	6	47445525	47594999	0.10704	0.8776	0.38015	0.859609	Brain
FECH	18	55215515	55254004	0.008021	0.877	0.38038	0.859609	Brain
B4GALT2	1	43978943	43991170	0.0907	0.8767	0.38064	0.859609	Plasma blood
OLA1	2	174937175	175113426	0.053203	-0.87588	0.381097	0.859943	Brain
CPQ	8	96645242	97149654	0.073058	-0.8739	0.38219	0.861665	Plasma blood
NUDT19	19	33182867	33204702	0.0433	0.8724	0.383	0.861665	Brain
PLTP	20	45898621	45912155	0.161079	0.871721	0.383	0.861665	Plasma blood
KLK13	19	51055626	51065114	0.06991	-0.87226	0.3831	0.861665	Plasma blood
PRSS2	7	142760398	142774564	0.074061	-0.871	0.38374	0.862294	Plasma blood
STXBP6	14	25278862	25519503	0.27154	0.86969	0.384	0.862294	Brain
SEC23IP	10	121652223	121702014	0.094942	0.86795	0.385419	0.863215	Brain
BOLA1	1	149887890	149900798	0.165	-0.8658	0.38658	0.863215	Plasma blood
ICAM5	19	10289952	10296778	0.218619	-0.86532	0.3869	0.863215	Plasma blood
NEK1	4	170314426	170533780	0.243	0.86459	0.3873	0.863215	Brain
CA3	8	85373436	85449040	0.03604	-0.8637	0.38775	0.863215	Plasma blood
CLSTN2	3	139935185	140577397	0.0383	0.86366	0.3878	0.863215	Plasma blood
TMEM109	11	60681346	60690915	0.04459	0.8639	0.388	0.863215	Brain
FCRL3	1	157674321	157700769	0.249	0.8623	0.38853	0.863215	Plasma blood
NTF3	12	5432108	5521536	0.002991	-0.8618	0.38881	0.863215	Plasma blood
PDK1	2	173420101	173489823	-0.00272	-0.86177	0.388815	0.863215	Brain
LYSMD1	1	151132224	151138424	0.0238	0.86168	0.389	0.863215	Brain
HSDL2	9	115142217	115234690	0.00811	-0.8612	0.389	0.863215	Brain
PDHX	11	34915829	35020591	0.046208	0.8617	0.389	0.863215	Plasma blood
CAPG	2	85394753	85418432	0.07879	-0.861	0.38926	0.863215	Plasma blood
CTU2	16	88772871	88781794	0.15988	-0.859693	0.38996	0.863215	Brain
TSPAN2	1	115590632	115632121	0.00266	0.86019	0.39	0.863215	Brain
CISD1	10	60028818	60049346	0.0817	0.85844	0.390652	0.863215	Brain
PCSK1	5	96390333	96434143	0.399	0.8581	0.3908	0.863215	Plasma blood
PLCB3	11	64018995	64036622	0.0463	0.8572	0.391	0.863215	Brain
MRC2	17	62627670	62693597	0.0527	0.85769	0.3911	0.863215	Plasma blood
EPHB1	3	134795260	135260467	0.0739	0.8552	0.3924	0.863215	Plasma blood
TNFRSF1B	1	12166991	12209228	0.0347	-0.8549	0.39258	0.863215	Plasma blood
CPA4	7	130293134	130324180	0.46478	0.8547	0.39272	0.863215	Plasma blood
DDAH1	1	85784164	86043933	0.0242	-0.85383	0.393	0.863215	Brain
CD200	3	112332347	112362812	0.0167	-0.8537	0.3933	0.863215	Plasma blood
SPATA20	17	48620419	48633213	0.0457	-0.8535	0.39339	0.863215	Brain
SPINT2	19	38244035	38292615	0.276703	0.85341	0.3934	0.863215	Plasma blood
GLUD1	10	88810243	88854623	0.399906	0.853	0.393657	0.863215	Brain
IDNK	9	86237964	86259045	0.0282	0.8528	0.394	0.863215	Brain
RCN3	19	49528003	49546962	0.001103	-0.85239	0.394	0.863215	Plasma blood
PMPCB	7	102937869	102969958	0.02376	0.852	0.39419	0.863215	Brain
SLC5A6	2	27422455	27435826	0.0429	0.85114	0.394694	0.863215	Brain
BCAN	1	156641390	156659532	0.0459	-0.8507	0.39491	0.863215	Plasma blood
IL22RA2	6	137143820	137173648	0.00776	-0.85022	0.3952	0.863215	Plasma blood
GPT	8	144502973	144507174	0.007822	0.8493	0.39572	0.863215	Plasma blood
FAM20A	17	68535113	68601367	0.0275	-0.848364	0.3962	0.863215	Plasma blood
APRT	16	88875747	88878352	0.447	-0.848129	0.39637	0.863215	Brain
NTN4	12	95657807	95791189	0.040368	0.8481	0.3964	0.863215	Plasma blood
PARK7	1	7954291	7985505	0.179	-0.8479	0.39652	0.863215	Plasma blood
APLP2	11	130068147	130144811	0.014538	0.8475	0.397	0.863584	Plasma blood
IL1RAP	3	190514051	190659750	0.419	0.84557	0.3978	0.863948	Plasma blood
C14orf159	14	91526677	91691976	0.15171	-0.84487	0.398	0.863948	Brain
SNPH	20	1246960	1289972	0.73316	0.845	0.3981	0.863948	Brain
PACSIN2	22	43231418	43411151	0.397	-0.8422	0.3997	0.864707	Brain
CD68	17	7579491	7582111	0.094	-0.841772	0.3999	0.864707	Plasma blood
MFI2	3	196715492	196756687	0.042879	0.84064	0.40055	0.864707	Brain
PIN1	19	9835257	9849689	0.001159	0.83995	0.4009	0.864707	Plasma blood
GOLGA3	12	133345495	133405444	0.121267	-0.83953	0.4012	0.864707	Brain
PKM2	15	72199029	72231822	0.00208	0.8393	0.4013	0.864707	Plasma blood
LINGO1	15	77613027	77820900	0.00552	-0.8382	0.40194	0.864707	Plasma blood
LGALS9	17	27629798	27649560	0.0365	0.836906	0.4026	0.864707	Plasma blood
PPIL3	2	201735630	201754026	0.01142	-0.83653	0.402855	0.864707	Brain
CPNE1	20	34213953	34252878	0.17163	-0.833	0.4046	0.864707	Brain
ASF1A	6	118894152	118909171	0.00399	-0.83312	0.40478	0.864707	Plasma blood
DCLK1	13	35768652	36131382	0.02836	0.8329	0.40488	0.864707	Plasma blood
CA1	8	85327608	85379014	0.045104	-0.8326	0.40505	0.864707	Plasma blood
SLITRK5	13	87671371	87696272	0.0209	-0.8319	0.40544	0.864707	Plasma blood
LEPR	1	65420652	65641559	0.454	-0.8318	0.40553	0.864707	Plasma blood
ITFG3	16	284545	319942	0.3925	-0.831228	0.40584	0.864707	Brain
PALM2	9	112403068	112713755	0.00979	-0.8301	0.406	0.864707	Brain
TNFSF15	9	114784652	114806039	0.00377	-0.8299	0.40662	0.864707	Plasma blood
HCLS1	3	121350246	121379774	0.0527	0.82907	0.40706	0.864707	Brain
PARP10	8	145051321	145086940	0.023299	0.8286	0.4073	0.864707	Brain
ELANE	19	851014	856247	0.019409	-0.82788	0.4077	0.864707	Plasma blood
GUF1	4	44680444	44702943	0.04468	-0.82765	0.4079	0.864707	Brain
GTPBP10	7	89964537	90020769	0.274939	-0.8265	0.40851	0.864707	Brain
LRPPRC	2	44113647	44223144	0.32	0.82643	0.40856	0.864707	Brain
SMCHD1	18	2655737	2805015	0.0403	-0.826	0.40865	0.864707	Brain
TMEM132B	12	125186386	125662377	0.040488	-0.8258	0.40892	0.864707	Plasma blood
AP2A2	11	924894	1012239	-0.000559	-0.8246	0.41	0.864707	Brain
MMP9	20	46008908	46016561	0.035061	0.823968	0.41	0.864707	Plasma blood
CFI	4	109740694	109801999	0.066968	-0.82344	0.4103	0.864707	Plasma blood
TFB1M	6	155578643	155635627	-0.00123	-0.8224	0.41083	0.864707	Brain
SLC2A11	22	24198890	24228496	0.064917	-0.8223	0.4109	0.864707	Brain
COPS7B	2	232646381	232673963	0.177915	-0.82214	0.410995	0.864707	Brain
GOSR2	17	45000483	45105003	0.0125	-0.8221	0.411042	0.864707	Brain
SV2C	5	75378997	75649764	0.015101	0.8215	0.411374	0.864707	Brain
TM7SF2	11	64879317	64883856	0.073917	0.8205	0.412	0.864707	Brain
RAB5A	3	19988571	20026667	0.00821	-0.82034	0.41202	0.864707	Brain
OSTM1	6	108362613	108487058	0.005431	-0.8202	0.41211	0.864707	Brain
TNXB	6	32041153	32115334	0.12549	-0.81866	0.41298	0.864707	Plasma blood
TRPT1	11	63991271	63993726	0.037129	-0.8173	0.414	0.864707	Brain
MSRA	8	9911778	10286401	0.0793	-0.8168	0.414	0.864707	Brain
SH3GL2	9	17579080	17797127	-0.0018	0.8168	0.414	0.864707	Brain
CTSS	1	150730079	150765957	0.168	0.8167	0.41409	0.864707	Plasma blood
PANX1	11	93862094	93915138	0.00207	0.8153	0.415	0.864707	Brain
IGF2R	6	159969082	160113507	0.17549	0.81466	0.41527	0.864707	Plasma blood
MMP19	12	55835433	55842966	0.008361	-0.8137	0.41581	0.864707	Plasma blood
SCLY	2	238969530	239008054	0.0264	-0.81367	0.415832	0.864707	Brain
TRABD2A	2	84821650	84907008	0.004	0.8136	0.41588	0.864707	Plasma blood
SMIM12	1	35178338	35325417	0.444	0.8136	0.416	0.864707	Brain
ENPP7	17	79730943	79742219	0.37	-0.813323	0.416	0.864707	Plasma blood
THNSL2	2	88469835	88486146	0.0507	-0.81337	0.416006	0.864707	Brain
FARS2	6	5261277	5771813	0.396	-0.8133	0.41606	0.864707	Brain
PLD1	3	171318195	171528740	0.003896	-0.8127	0.41639	0.864707	Brain
C21orf2	21	45748827	45759285	0.049406	0.811	0.41735	0.864707	Brain
NCOA7	6	126102307	126252266	-0.003	0.8109	0.41741	0.864707	Brain
CCS	11	66360292	66373490	0.041687	-0.8099	0.418	0.864707	Brain
GCDH	19	13001840	13025021	0.0268	0.8094	0.4183	0.864707	Brain
AS3MT	10	104629273	104661656	0.21645	-0.8082	0.418978	0.864707	Brain
FAM47E-STBD1	4	77172886	77232752	0.0428	0.80812	0.419	0.864707	Brain
RHOC	1	112701127	112707434	0.0234	-0.8072	0.41956	0.864707	Plasma blood
C1QL1	17	44959693	44968303	0.0544	-0.806621	0.4199	0.864707	Plasma blood
LARS2	3	45429998	45590913	0.006355	-0.80655	0.41992	0.864707	Brain
MINPP1	10	87504875	87553461	0.01089	-0.80637	0.42003	0.864707	Plasma blood
APCS	1	159587826	159588865	0.0375	-0.8062	0.42012	0.864707	Plasma blood
RECQL	12	21621845	21654603	0.332514	0.80574	0.4204	0.864707	Brain
DEPTOR	8	120885957	121063152	0.088026	0.8056	0.4205	0.864707	Brain
PDE4C	19	18318771	18366229	0.12373	-0.8053	0.4207	0.864707	Brain
CERS4	19	8271620	8327305	0.08636	-0.8051	0.4208	0.864707	Brain
DNLZ	9	139253932	139258241	0.09275	-0.8049	0.421	0.864707	Brain
SLPI	20	45252239	45254564	0.02467	-0.804779	0.421	0.864707	Plasma blood
CD300A	17	74466399	74484794	0.245	-0.804444	0.4211	0.864707	Plasma blood
NQO1	16	69740899	69760854	0.08482	0.803334	0.42178	0.864707	Brain
ACY3	11	67410026	67418130	0.49565	-0.8034	0.422	0.864707	Brain
LACE1	6	108616098	108847999	0.238	0.8029	0.42201	0.864707	Brain
PTGR1	9	111549722	111599893	0.09922	0.8026	0.42219	0.864707	Plasma blood
AMY2B	1	103553815	103579534	0.0612	0.8025	0.42229	0.864707	Plasma blood
C15orf27	15	76352178	76521462	0.011083	-0.8023	0.422378	0.864707	Brain
NT5C	17	73126320	73127890	0.04195	-0.8008	0.423234	0.864707	Brain
ABO	9	133233278	133276024	0.29217	-0.8002	0.4236	0.864707	Plasma blood
LMO7	13	76194570	76434004	0.002647	-0.7998	0.4238	0.864707	Brain
TAMM41	3	11831916	11888393	0.03745	-0.79963	0.42392	0.864707	Brain
PPP3CC	8	22298332	22398652	0.368201	-0.7995	0.424	0.864707	Brain
PPP2R4	9	131873229	131911225	0.00883	-0.7972	0.425	0.864707	Brain
MON1A	3	49946302	49967606	0.15327	0.79637	0.42582	0.864707	Brain
PAM16	16	4381550	4405608	0.000369	0.796259	0.42588	0.864707	Brain
AKR1A1	1	46016215	46035721	0.00841	0.79586	0.426	0.864707	Brain
TXNL4B	16	72044289	72094431	0.04058	0.79596	0.42606	0.864707	Plasma blood
C1QTNF3	5	34017858	34043213	0.00894	-0.7958	0.4262	0.864707	Plasma blood
FDX1L	19	10416103	10426691	0.486	-0.7948	0.4267	0.864707	Brain
ASAH2	10	50182778	50279720	0.134254	-0.79408	0.42715	0.864707	Plasma blood
AFM	4	73481745	73504001	0.05276	0.79352	0.4275	0.864707	Plasma blood
BPGM	7	134646811	134679816	0.005718	-0.793	0.42779	0.864707	Plasma blood
TPD52	8	80870571	81143467	0.09056	-0.793	0.4278	0.864707	Brain
COG7	16	23399814	23464501	0.05003	0.792754	0.42792	0.864707	Brain
NENF	1	212606229	212619714	0.04314	0.79205	0.428	0.864707	Brain
ITLN1	1	160876540	160885180	0.00341	-0.7925	0.42805	0.864707	Plasma blood
CLIC5	6	45880827	46080348	0.07306	-0.79209	0.42831	0.864707	Plasma blood
TSPAN15	10	71211229	71267425	0.106	-0.79127	0.428787	0.864844	Brain
EMILIN3	20	41359962	41366818	0.062248	-0.790454	0.429	0.864844	Plasma blood
TAX1BP3	17	3662895	3668679	0.0106	-0.789323	0.4299	0.865973	Plasma blood
CYBRD1	2	172378757	172414643	-6.73e-05	-0.78888	0.430183	0.865973	Brain
HBZ	16	142728	154503	0.2181	-0.78656	0.43154	0.867569	Plasma blood
SCO2	22	50523568	50526461	0.011798	-0.7865	0.4316	0.867569	Plasma blood
RPL13	16	89627065	89630950	0.328	0.784223	0.43291	0.86901	Brain
PLD3	19	40348456	40380439	0.020549	0.78194	0.4343	0.86901	Plasma blood
EVI5L	19	7895119	7929862	0.05627	-0.781	0.4348	0.86901	Brain
ESM1	5	54977867	55022671	0.012	0.7804	0.4351	0.86901	Plasma blood
TST	22	37406900	37415681	0.00789	0.7785	0.4363	0.86901	Brain
CLCC1	1	109472130	109506111	0.006936	-0.7775	0.437	0.86901	Brain
ARRB1	11	75260122	75351705	0.1173	0.7767	0.437	0.86901	Plasma blood
STX1A	7	73113536	73134002	0.0227	0.7763	0.43756	0.86901	Brain
TNFSF8	9	114893343	114930595	0.02795	-0.776	0.43777	0.86901	Plasma blood
CTSH	15	79213400	79241916	0.00528	0.7759	0.437818	0.86901	Brain
RUVBL1	3	127783621	127872757	0.33261	0.77587	0.43783	0.86901	Brain
QSOX2	9	136206333	136245812	0.10195	-0.7752	0.43819	0.86901	Plasma blood
SERGEF	11	17809595	18034709	0.041489	0.7741	0.439	0.86901	Brain
PPAPDC2	9	4662298	4665256	0.0976	-0.7739	0.439	0.86901	Brain
SIGLEC15	18	45825675	45844094	0.008377	-0.7746	0.439	0.86901	Plasma blood
MOCS1	6	39867354	39902290	0.07657	0.7737	0.4391	0.86901	Brain
UFSP2	4	186320694	186347139	0.245	-0.77218	0.44	0.86901	Brain
IGHG1|IGHG2|IGHG3|IGHG4|IGK@|IGL@	14	105736343	105743071	0.013447	-0.7721	0.44007	0.86901	Plasma blood
PTPRA	20	2844830	3019722	0.013759	-0.771	0.441	0.86901	Brain
HAAO	2	42994229	43019733	0.03849	0.7703	0.441123	0.86901	Brain
NPPB	1	11857464	11858945	0.0197	0.7699	0.44138	0.86901	Plasma blood
GZMK	5	55024256	55034570	0.0122	-0.7692	0.4418	0.86901	Plasma blood
TMED5	1	93615299	93646285	0.0839	-0.76948	0.442	0.86901	Brain
OLFM1	9	135075422	135121180	0.00777	0.7682	0.44237	0.86901	Plasma blood
LILRB2	19	54273812	54281184	0.372729	-0.76822	0.4424	0.86901	Plasma blood
HTN3	4	70028455	70036538	0.0117	-0.76743	0.4428	0.86901	Plasma blood
PPP2R5B	11	64685025	64701945	0.0625	-0.7673	0.443	0.86901	Brain
EPN2	17	19118928	19240028	-0.00264	0.7658	0.443797	0.86901	Brain
C3	19	6677704	6730562	0.005016	-0.76585	0.4438	0.86901	Plasma blood
WARS2	1	119573839	119683294	0.031132	-0.76473	0.444	0.86901	Brain
GRHPR	9	37422663	37436987	0.254	0.766	0.444	0.86901	Brain
LDLRAP1	1	25543606	25568886	0.0609	0.765	0.44425	0.86901	Plasma blood
LLGL1	17	18128901	18148189	0.02979	0.7645	0.444591	0.86901	Brain
ETNPPL	4	109663196	109684210	0.0407	0.76449	0.4446	0.86901	Brain
CPB1	3	148791102	148860187	0.0591	0.76363	0.4451	0.86901	Plasma blood
DCUN1D1	3	182655862	182703741	0.013416	0.76266	0.44566	0.86901	Brain
GDPD1	17	57297828	57353328	0.034862	0.7623	0.445852	0.86901	Brain
APP	21	25880550	26171128	0.01192	-0.7627	0.446	0.86901	Plasma blood
ACOX3	4	8368009	8442450	0.0666	0.76102	0.4466	0.86901	Brain
DDOST	1	20651767	20661544	0.0195	-0.761	0.44666	0.86901	Plasma blood
ANXA2	15	60639333	60695082	0.0442	-0.76	0.447236	0.86901	Brain
EML2	19	46110252	46148887	0.00162	0.759	0.4479	0.86901	Brain
PHPT1	9	136848724	136851027	0.12056	0.7583	0.44824	0.86901	Plasma blood
MDGA2	14	46839629	47675605	0.06205	0.7581	0.44839	0.86901	Plasma blood
ACAT2	6	160181360	160200144	0.08114	0.757	0.44905	0.86901	Brain
HSP90B1	12	104323885	104347423	0.048356	-0.75649	0.4494	0.86901	Brain
SPRED1	15	38544527	38649450	-0.000921	0.7562	0.449517	0.86901	Brain
RIPK2	8	89757806	89791064	0.004766	-0.756	0.44964	0.86901	Plasma blood
STEAP2	7	89796904	89867451	0.03234	-0.756	0.44967	0.86901	Brain
SELM	22	31104772	31120069	0.005419	-0.756	0.44967	0.86901	Plasma blood
AGPAT5	8	6565878	6617184	0.015	0.7558	0.4497	0.86901	Brain
CCL22	16	57358783	57366189	0.01632	-0.75592	0.4497	0.86901	Plasma blood
LIMS1	2	109150857	109303702	0.03911	-0.75569	0.449838	0.86901	Brain
CYB561	17	61509665	61523739	0.00514	-0.7548	0.450354	0.86901	Brain
TNFRSF10D	8	23135588	23164027	0.004982	-0.7545	0.45052	0.86901	Plasma blood
PARL	3	183547173	183602721	0.132427	-0.75437	0.45063	0.86901	Brain
GPRIN3	4	90157537	90229161	0.078208	0.7542	0.4507	0.86901	Brain
APOA4	11	116820700	116823304	0.031056	0.7536	0.451	0.86901	Plasma blood
IDH3A	15	78423840	78464291	0.087227	0.7532	0.451328	0.86901	Brain
CNRIP1	2	68284171	68320051	0.16899	-0.7526	0.45167	0.86901	Plasma blood
HADH	4	108910870	108956331	0.17823	0.75218	0.4519	0.86901	Brain
BPNT1	1	220230824	220263804	0.021571	0.7526	0.452	0.86901	Brain
ADH1C	4	99336497	99352746	0.144197	-0.75169	0.4522	0.86901	Plasma blood
TBC1D10A	22	30687979	30723035	0.0591	0.751	0.4526	0.86901	Brain
GPSM1	9	139221932	139254057	0.015204	0.7491	0.454	0.86901	Brain
CLEC1B	12	9985642	10013424	0.064748	-0.7483	0.45428	0.86901	Plasma blood
DTD2	14	31446036	31457506	0.046087	-0.7472	0.45496	0.86901	Plasma blood
NPNT	4	105894775	106004027	0.055173	-0.74632	0.4555	0.86901	Plasma blood
SBDS	7	66987680	66995587	0.09158	0.7459	0.45572	0.86901	Plasma blood
ATP5O	21	35275757	35288284	0.13585	-0.746	0.4558	0.86901	Brain
TBC1D15	12	72233487	72320629	0.239	-0.74397	0.4569	0.86901	Brain
TMEM120A	7	75616155	75623977	-0.002607	-0.7439	0.45692	0.86901	Brain
CHORDC1	11	89934328	89956532	0.078	0.7433	0.457	0.86901	Brain
ARHGAP1	11	46677080	46700619	0.000336	-0.7442	0.457	0.86901	Plasma blood
CPVL	7	29034847	29235067	0.00635	-0.7436	0.4571	0.86901	Brain
RPAP1	15	41809374	41836467	0.166	-0.7434	0.45727	0.86901	Brain
CLPS	6	35794982	35797344	0.08079	0.74333	0.45728	0.86901	Plasma blood
ATP1B3	3	141594966	141645356	0.03512	-0.74313	0.45741	0.86901	Brain
GCA	2	162318840	162371595	0.07967	-0.7422	0.45799	0.86901	Plasma blood
RELT	11	73376399	73397474	0.006252	-0.7428	0.458	0.86901	Plasma blood
SCARF1	17	1633858	1645744	0.333	-0.741758	0.4582	0.86901	Plasma blood
CA13	8	85220587	85284073	0.176119	-0.7411	0.4586	0.86901	Plasma blood
TPRG1L	1	3541566	3546691	0.301773	-0.74132	0.459	0.86901	Brain
RDH11	14	68143518	68162531	0.0744	-0.74049	0.459	0.86901	Brain
SMPD1	11	6390440	6394998	0.129988	-0.7398	0.459	0.86901	Plasma blood
CAMP	3	48223347	48225491	0.00226	-0.74024	0.4592	0.86901	Plasma blood
SERPINA12	14	94487274	94517844	0.098191	-0.7391	0.45987	0.869083	Plasma blood
PDLIM1	10	95237572	95291012	0.030062	-0.73794	0.46055	0.869083	Plasma blood
CADM2	3	84958989	86074429	0.00655	0.73731	0.4609	0.869083	Plasma blood
CRELD2	22	50311815	50321188	0.029008	0.7359	0.4618	0.869083	Brain
ATP13A1	19	19756007	19774502	0.048257	0.7355	0.4621	0.869083	Brain
NDST1	5	150485818	150558211	0.0239	0.7348	0.4625	0.869083	Plasma blood
CRTAM	11	122838500	122872643	0.040466	-0.7344	0.463	0.869083	Plasma blood
MYO6	6	75749192	75919537	0.01579	0.73298	0.46357	0.869083	Plasma blood
MIF	22	23894383	23895227	0.034175	-0.7324	0.46395	0.869083	Plasma blood
CD177	19	43353686	43363172	0.090692	-0.73226	0.464	0.869083	Plasma blood
UBLCP1	5	159263290	159286036	0.011	0.7314	0.4646	0.869083	Plasma blood
HINT3	6	126277927	126301387	0.07212	0.7302	0.46525	0.869083	Brain
TATDN1	8	125500726	125551699	0.027373	0.7299	0.4655	0.869083	Brain
ACTN1	14	69340860	69446157	0.02353	-0.72838	0.466	0.869083	Brain
ESAM	11	124752583	124762290	0.053816	0.7287	0.466	0.869083	Plasma blood
C12orf73	12	104343980	104359486	0.0138	-0.72823	0.4665	0.869083	Brain
COMP	19	18782773	18791305	0.024051	-0.72775	0.4668	0.869083	Plasma blood
HDHD2	18	44633774	44676891	0.074424	-0.728	0.4669	0.869083	Brain
SECTM1	17	82321024	82334074	0.06	0.727523	0.4669	0.869083	Plasma blood
NSFL1C	20	1442162	1473842	0.003087	-0.725514	0.468	0.869083	Plasma blood
NLGN1	3	173396284	174286644	0.0204	-0.72555	0.4681	0.869083	Plasma blood
UVRAG	11	75526212	75854239	0.036607	-0.7245	0.469	0.869083	Brain
TP53I3	2	24300303	24308731	-0.00103	-0.7236	0.469308	0.869083	Brain
HLA-DQA2	6	32741391	32747198	0.14885	-0.72352	0.46936	0.869083	Plasma blood
ANGPTL1	1	178849535	178871077	0.0944	-0.7225	0.47001	0.869083	Plasma blood
NISCH	3	52455118	52493068	0.000784	-0.72217	0.4702	0.869083	Plasma blood
IBSP	4	87799554	87812435	0.006083	0.72221	0.4702	0.869083	Plasma blood
IL1R2	2	101991960	102028544	0.12675	0.722	0.47028	0.869083	Plasma blood
PRDX3	10	120927215	120938345	0.273	-0.72185	0.470388	0.869083	Brain
GALM	2	38893052	38968379	0.041	0.72167	0.470498	0.869083	Brain
AK4	1	65613232	65697828	0.00468	0.72057	0.471	0.869083	Brain
GCLM	1	93885199	93909456	0.0252	0.7195	0.47183	0.869083	Plasma blood
PLGRKT	9	5357973	5437878	0.123	0.7187	0.472	0.869083	Brain
PRCP	11	82822936	82970584	0.034518	0.7192	0.472	0.869083	Plasma blood
ENTPD6	20	25195693	25228075	0.018226	-0.719383	0.472	0.869083	Plasma blood
NHLRC2	10	115614420	115676953	0.02602	-0.71832	0.47256	0.869083	Brain
SPAG7	17	4862521	4871167	0.0602	-0.7183	0.47256	0.869083	Brain
VWC2	7	49773638	49921950	0.100015	0.7183	0.47257	0.869083	Plasma blood
S100A6	1	153534599	153536244	0.0197	0.7177	0.47293	0.869083	Plasma blood
ACOT13	6	24667263	24705293	0.117235	-0.7169	0.473	0.869083	Brain
LAYN	11	111540280	111561745	0.028963	0.7176	0.473	0.869083	Plasma blood
GSS	20	34928432	34956027	0.091434	-0.718018	0.473	0.869083	Plasma blood
FAM185A	7	102389418	102449672	0.02646	0.7169	0.47343	0.869083	Brain
EPHB4	7	100802565	100827523	0.03065	0.7166	0.47365	0.869083	Plasma blood
FH	1	241497511	241519799	0.0127	-0.7155	0.47428	0.869083	Plasma blood
YOD1	1	207217194	207226325	0.069	-0.71448	0.475	0.869083	Brain
COL18A1	21	45405165	45513720	0.04222	0.7142	0.475	0.869083	Plasma blood
PSG5	19	43166256	43186536	0.176829	0.71418	0.4751	0.869083	Plasma blood
ACP1	2	264140	278283	0.0571	-0.71394	0.475266	0.869083	Brain
PSMD9	12	122326637	122356203	0.606	0.71284	0.4759	0.869083	Brain
AGL	1	100315640	100389579	0.125618	-0.71331	0.476	0.869083	Brain
IL17B	5	149371324	149404202	0.0146	-0.7127	0.476	0.869083	Plasma blood
AIFM3	22	21319396	21335649	0.429	-0.7112	0.477	0.869083	Brain
DLK1	14	100725705	100738224	0.097793	-0.7107	0.47725	0.869083	Plasma blood
EPHB6	7	142855061	142871094	0.140539	-0.7104	0.47747	0.869083	Plasma blood
PLIN4	19	4502204	4517716	0.032412	-0.7103	0.4775	0.869083	Brain
AHSG	3	186613060	186621318	0.11	0.70831	0.4788	0.869083	Plasma blood
METTL24	6	110243940	110358349	0.01198	-0.70793	0.47899	0.869083	Plasma blood
SIGLEC6	19	51517819	51531856	0.175583	-0.70726	0.4794	0.869083	Plasma blood
FHIT	3	59747277	61251459	0.01	0.70635	0.48	0.869083	Plasma blood
RWDD2B	21	30376705	30391699	0.1291	-0.705	0.48073	0.869083	Brain
CCL3	17	36088256	36090169	0.0882	-0.705073	0.4808	0.869083	Plasma blood
RCN1	11	31833939	32127301	0.388	0.7052	0.481	0.869083	Brain
DSG2	18	31498177	31549008	0.057265	0.7047	0.481	0.869083	Plasma blood
PCK1	20	57561080	57568121	0.022954	0.705353	0.481	0.869083	Plasma blood
SFTPB	2	85657314	85668741	0.13379	0.7046	0.48106	0.869083	Plasma blood
PANK2	20	3869486	3907605	0.0929	-0.704	0.4815	0.869083	Brain
SYNJ2	6	158402888	158520208	0.16767	0.7024	0.48241	0.869083	Brain
EPG5	18	43427574	43547240	0.016579	-0.702	0.48246	0.869083	Brain
PCYOX1L	5	148737570	148749216	0.029704	0.7019	0.482747	0.869083	Brain
GC	4	71741696	71804041	0.008557	-0.70163	0.4829	0.869083	Plasma blood
MPO	17	58269855	58280935	0.0299	0.70114	0.4832	0.869083	Plasma blood
SLC16A1	1	113454469	113499635	0.078855	-0.70059	0.484	0.869083	Brain
C2orf43	2	20883788	21022882	0.033	0.69931	0.484356	0.869083	Brain
LGALS7	19	38770968	38791754	0.002757	0.6976	0.4854	0.869083	Plasma blood
ATL3	11	63391559	63439393	0.116	-0.696	0.486	0.869083	Brain
TALDO1	11	747415	765012	0.003125	-0.697	0.486	0.869083	Plasma blood
MMP8	11	102711796	102727050	0.024796	0.6962	0.486	0.869083	Plasma blood
RNASE4	14	20684560	20701216	0.112673	0.6961	0.48636	0.869083	Plasma blood
MFGE8	15	88898683	88913381	0.07782	0.696	0.48642	0.869083	Plasma blood
FAM160B2	8	21946670	21962409	0.0685	0.6959	0.4865	0.869083	Brain
POR	7	75899200	75986855	0.00733	-0.6958	0.48658	0.869083	Plasma blood
MTG2	20	60758085	60778624	0.01466	-0.696	0.4867	0.869083	Brain
NTPCR	1	233086351	233119628	-0.00109	0.6954	0.487	0.869083	Brain
LDHA	11	18394560	18408425	0.009599	0.6955	0.487	0.869083	Plasma blood
TMEM231	16	75572015	75590184	0.676	0.694954	0.48708	0.869083	Brain
MON1B	16	77224732	77236302	0.05049	-0.694773	0.4872	0.869083	Brain
SNX25	4	186125391	186291339	0.01251	-0.69455	0.4873	0.869083	Brain
VSTM2A	7	54610018	54638773	0.058467	0.6939	0.48776	0.869083	Brain
UCMA	10	13221766	13234374	0.047975	0.6937	0.48787	0.869083	Plasma blood
SERPINH1	11	75562056	75572783	0.02143	0.6928	0.488	0.869083	Plasma blood
CPNE8	12	39040624	39301232	0.000707	0.693	0.4883	0.869083	Brain
FBXO22	15	76196200	76227609	0.023456	-0.6925	0.488601	0.869083	Brain
IL23R	1	67138907	67259979	0.0024	0.6918	0.48904	0.869083	Plasma blood
MVD	16	88718343	88729569	0.04267	-0.691745	0.4891	0.869083	Brain
TMEM127	2	96914254	96931732	0.0668	0.6915	0.48925	0.869083	Brain
PPL	16	4932508	5010742	0.0725	-0.690743	0.48973	0.86938	Brain
NECAB2	16	84002237	84036381	0.00475	0.689198	0.4907	0.870523	Brain
BPI	20	38304150	38337505	0.093459	0.687993	0.491	0.870523	Plasma blood
THBS2	6	169215780	169254050	0.15851	-0.68593	0.49276	0.873087	Plasma blood
ARHGAP44	17	12692856	12894960	0.0854	0.6848	0.493466	0.873613	Brain
BMPER	7	33904308	34156427	0.016771	-0.6843	0.49377	0.873613	Plasma blood
FBP1	9	97365415	97402531	0.026956	0.6833	0.494	0.873613	Brain
AOC1	7	150824627	150861504	0.288496	-0.6796	0.49673	0.876308	Plasma blood
ANXA5	4	122589110	122618268	0.10966	-0.67949	0.4968	0.876308	Brain
VWA8	13	42140973	42535256	0.338469	-0.6793	0.4969	0.876308	Brain
CD53	1	111415775	111442550	0.242212	-0.6787	0.497	0.876308	Brain
SCGB3A1	5	180590105	180591499	0.00549	-0.6791	0.4971	0.876308	Plasma blood
PDLIM5	4	95373037	95589377	0.0617	-0.67613	0.499	0.876516	Brain
TSTA3	8	144694788	144700218	0.079878	0.6757	0.4992	0.876516	Brain
C1orf123	1	53679771	53686289	0.0378	0.6748	0.5	0.876516	Brain
HMBS	11	118955576	118964259	0.156	-0.6738	0.5	0.876516	Brain
RGMA	15	93035273	93089204	0.02502	-0.674	0.50034	0.876516	Plasma blood
PLAT	8	42174718	42207709	0.011275	0.6739	0.50034	0.876516	Plasma blood
IL17RA	22	17084954	17115694	0.316326	0.6739	0.5004	0.876516	Plasma blood
SERPING1	11	57597387	57619171	0.3255	0.6734	0.501	0.876516	Plasma blood
SRL	16	4189374	4242080	0.0126	-0.67278	0.50109	0.876516	Plasma blood
UGT1A1	2	233760270	233773300	0.16126	0.6726	0.50118	0.876516	Plasma blood
PGLYRP1	19	46019153	46023053	0.019025	0.67145	0.5019	0.876516	Plasma blood
CXCL1	4	73869393	73871308	0.132887	0.67157	0.5019	0.876516	Plasma blood
VWA5A	11	123986069	124018428	0.0475	-0.6708	0.502	0.876516	Brain
MCEE	2	71336814	71357369	0.15	0.66951	0.503171	0.876516	Brain
HK3	5	176880869	176899346	0.0108	-0.6694	0.5032	0.876516	Plasma blood
SUSD5	3	33191537	33260707	0.464	-0.66847	0.50383	0.876516	Brain
IBA57	1	228353516	228369958	0.144808	0.6676	0.504	0.876516	Brain
CLPP	19	6361463	6368919	0.0158	-0.668	0.5041	0.876516	Brain
USP15	12	62260338	62417431	0.140268	0.668	0.50416	0.876516	Plasma blood
HEBP2	6	138724668	138743334	0.09215	0.667	0.50474	0.876516	Brain
NXN	17	702553	883010	0.024026	0.6669	0.504857	0.876516	Brain
EFNA3	1	155036224	155060014	-0.002648	0.66595	0.505	0.876516	Brain
CAPN2	1	223889295	223963720	0.0207	0.66675	0.505	0.876516	Brain
EIF4E3	3	71724567	71803924	0.0456	0.66658	0.50504	0.876516	Brain
HEXIM1	17	45148475	45152099	0.0156	-0.666558	0.5051	0.876516	Plasma blood
GLTPD2	17	4788964	4790589	0.0363	0.664432	0.5064	0.877348	Plasma blood
CSF1R	5	150053291	150113372	0.021	0.6639	0.5067	0.877348	Plasma blood
NCR1	19	54906148	54916140	0.011829	-0.66386	0.5068	0.877348	Plasma blood
FAM221A	7	23719749	23742868	0.070226	-0.6621	0.50794	0.877348	Brain
ADCY3	2	25042038	25142708	0.133	0.662	0.507969	0.877348	Brain
CASP9	1	15817327	15853029	0.0329	-0.66225	0.508	0.877348	Brain
RTN3	11	63448918	63527363	0.0829	-0.6625	0.508	0.877348	Brain
AKR1C3	10	5035354	5107686	0.007828	0.66167	0.50818	0.877348	Plasma blood
LY9	1	160796074	160828261	0.124	-0.6613	0.50842	0.877348	Plasma blood
CTPS1	1	41445007	41478235	-0.00153	-0.65986	0.509	0.877804	Brain
FN1	2	215360440	215436073	0.03081	0.6571	0.51112	0.879497	Plasma blood
NTN1	17	9021510	9244000	0.0874	0.656799	0.5113	0.879497	Plasma blood
NAPA	19	47990894	48018497	0.0643	0.6566	0.5115	0.879497	Brain
DOK2	8	21908873	21913690	0.016655	-0.6562	0.51171	0.879497	Plasma blood
HS3ST3B1	17	14301081	14349404	0.00678	0.656085	0.5118	0.879497	Plasma blood
LRP8	1	53242364	53328469	0.03	-0.6559	0.51188	0.879497	Plasma blood
HEXB	5	74640023	74722647	0.0792	0.6543	0.5129	0.879678	Plasma blood
ALG8	11	77811982	77850706	0.02701	-0.6537	0.513	0.879678	Brain
EFNA5	5	107376894	107670937	0.0368	-0.6537	0.5133	0.879678	Plasma blood
DNAJC10	2	183580999	183659191	0.0277	-0.65344	0.513476	0.879678	Brain
BLVRA	7	43798279	43846939	0.0497	0.6525	0.51409	0.879678	Brain
ATAD1	10	89511269	89601100	0.14	-0.65247	0.514096	0.879678	Brain
RSPO2	8	107899316	108083642	0.002116	0.6523	0.5142	0.879678	Plasma blood
SIK3	11	116714118	116969153	0.0016	0.6517	0.515	0.880362	Brain
UGT1A6	2	234600253	234681946	0.0456	-0.65061	0.5153	0.880362	Brain
CA14	1	150229554	150237478	0.00126	-0.64984	0.516	0.880362	Brain
RASA2	3	141205889	141334184	0.0586	0.64953	0.516	0.880362	Brain
LRRC15	3	194355249	194369743	0.138	-0.64911	0.5163	0.880362	Plasma blood
TAB1	22	39795746	39833065	0.071475	-0.6488	0.5165	0.880362	Brain
FRRS1L	9	111892573	111929571	0.057776	0.6465	0.518	0.880974	Brain
CYB5D2	17	4143168	4187310	0.0499	-0.646278	0.5181	0.880974	Plasma blood
CROT	7	87345664	87399794	0.06532	0.6449	0.51898	0.880974	Plasma blood
MEGF9	9	123363091	123476748	0.03861	0.6456	0.519	0.880974	Brain
CXCL6	4	73836640	73849064	0.179899	-0.64447	0.5193	0.880974	Plasma blood
STX7	6	132445867	132513198	0.02187	0.64402	0.51956	0.880974	Plasma blood
CFHR4	1	196888014	196918713	0.165	-0.644	0.51957	0.880974	Plasma blood
TBC1D22A	22	47158518	47571336	0.0121	-0.643	0.5202	0.880974	Brain
CECR1	22	17178790	17258235	0.31846	0.6422	0.52073	0.880974	Plasma blood
PYGM	11	64513861	64527769	0.005893	0.6422	0.521	0.880974	Brain
ELP3	8	27947190	28048673	0.0817	0.6418	0.521	0.880974	Brain
GUSB	7	65960684	65982215	0.013504	0.6413	0.52132	0.880974	Plasma blood
OAF	11	120211032	120230334	0.159983	0.6406	0.522	0.880974	Plasma blood
HGFAC	4	3441968	3449486	0.311692	0.64017	0.5221	0.880974	Plasma blood
LRRC57	15	42834720	42841000	0.337131	0.6397	0.522361	0.880974	Brain
NME1-NME2	17	49230920	49249108	0.05216	0.6387	0.523013	0.880974	Brain
ICA1L	2	203640690	203736708	0.075735	-0.63869	0.523025	0.880974	Brain
DUSP19	2	183943287	183964733	0.163	-0.6381	0.523409	0.880974	Brain
MTHFS	15	79833585	79897379	0.23231	-0.6377	0.52365	0.880974	Plasma blood
C5orf22	5	31532373	31555165	0.129	0.6375	0.523812	0.880974	Brain
NIT1	1	161087876	161095235	-0.001812	-0.63685	0.524	0.880974	Brain
LPIN1	2	11817721	11967535	0.295	0.63707	0.524082	0.880974	Brain
AMIGO2	12	47075707	47079959	0.008281	0.636	0.5248	0.880974	Plasma blood
PCSK7	11	117204337	117232525	0.339376	0.636	0.525	0.880974	Plasma blood
CDC16	13	115000362	115038198	0.00408	0.635	0.5254	0.880974	Brain
AGRN	1	1020120	1056118	0.0412	-0.6339	0.52616	0.880974	Plasma blood
PLEKHF2	8	96146032	96168912	0.03209	-0.6339	0.5262	0.880974	Brain
GSN	9	121207794	121332843	0.01968	0.6332	0.52663	0.880974	Plasma blood
ASAP3	1	23755056	23811061	0.01006	0.63263	0.527	0.880974	Brain
HTATIP2	11	20385231	20405329	0.0777	-0.633	0.527	0.880974	Brain
FNBP1	9	132649466	132805473	0.0737	0.633	0.527	0.880974	Brain
CHST9	18	26906481	27185308	0.03907	-0.632	0.527	0.880974	Plasma blood
IGSF3	1	116574399	116667755	0.0203	-0.6291	0.52929	0.883853	Plasma blood
CCL18	17	36064272	36072032	0.174	-0.628972	0.5294	0.883853	Plasma blood
ACADSB	10	124768495	124817827	0.06331	-0.6285	0.529676	0.883853	Brain
NME7	1	169101769	169337205	0.0395	0.62826	0.53	0.883863	Brain
TRIP10	19	6737925	6751530	0.008587	0.62712	0.5306	0.884333	Plasma blood
B3GNT2	2	62196115	62224731	0.02153	-0.6255	0.53163	0.885075	Plasma blood
SEMA3C	7	80742538	80922359	0.011798	-0.6252	0.53185	0.885075	Plasma blood
ICOSLG	21	44217014	44240966	0.00958	-0.6247	0.532	0.885075	Plasma blood
FAIM	3	138608606	138633376	0.0684	0.62317	0.5332	0.885814	Plasma blood
APOE	19	44905791	44909393	0.002029	0.62296	0.5333	0.885814	Plasma blood
CCL7	17	34270221	34272242	0.119	-0.622868	0.5334	0.885814	Plasma blood
CDHR5	11	616577	626078	0.014275	-0.6222	0.534	0.886055	Plasma blood
IQGAP1	15	90931450	91045475	0.0755	0.6216	0.534183	0.886055	Brain
HS3ST3A1	17	13494032	13601929	0.00301	0.621049	0.5346	0.886218	Plasma blood
SARM1	17	26691378	26728065	0.00786	0.6165	0.537595	0.88932	Brain
MFSD11	17	74731947	74777531	0.255181	0.6162	0.537786	0.88932	Brain
CNTN5	11	99020949	100358885	0.069459	-0.616	0.538	0.88932	Plasma blood
PROS1	3	93873051	93980003	0.0089	-0.61495	0.5386	0.88932	Plasma blood
PDIA5	3	123067025	123225227	0.482	-0.61484	0.5387	0.88932	Plasma blood
LYRM4	6	5102827	5261172	0.0046	0.6144	0.53896	0.88932	Brain
SMOC1	14	69854131	70032366	0.071051	0.6143	0.539	0.88932	Plasma blood
CHL1	3	196763	409417	0.0427	-0.61383	0.5393	0.88932	Plasma blood
TMEM43	3	14166440	14185179	0.408707	0.6138	0.53935	0.88932	Brain
ACAD11	3	132276982	132379567	0.073624	0.61196	0.54056	0.890684	Brain
DPEP1	16	89613308	89638456	0.13083	-0.61097	0.54122	0.890684	Plasma blood
CAMLG	5	134074191	134087847	0.107965	0.6108	0.54133	0.890684	Brain
SERPINA10	14	94280460	94293268	0.206856	0.6106	0.5415	0.890684	Plasma blood
AHCYL1	1	109984765	110023742	0.000952	0.61	0.54187	0.890684	Plasma blood
NTRK2	9	84668551	85027054	0.00558	0.6096	0.5421	0.890684	Plasma blood
ADH1A	4	99276369	99291003	0.056308	0.60805	0.5432	0.891345	Plasma blood
PIP5KL1	9	130683158	130693076	0.172483	0.6065	0.544	0.891345	Brain
TIMP3	22	32801705	32863041	0.176709	0.6062	0.54435	0.891345	Plasma blood
BLVRB	19	40953696	40971747	0.21204	0.606	0.5445	0.891345	Brain
CLPB	11	72003469	72145692	-0.00103	-0.6056	0.545	0.891345	Brain
CLSTN1	1	9728926	9823984	0.106	-0.6048	0.54532	0.891345	Plasma blood
SQRDL	15	45923346	45983492	0.126	-0.6047	0.545365	0.891345	Brain
CHRM3	1	239549865	240078750	0.17025	0.60256	0.547	0.891345	Brain
FAM20B	1	179025804	179076567	0.0117	0.6022	0.54704	0.891345	Plasma blood
STRN	2	37070783	37193615	-9.16e-05	-0.60211	0.547102	0.891345	Brain
NAAA	4	76831809	76862204	0.0429	0.60172	0.5474	0.891345	Brain
REG3A	2	79157003	79159753	0.02359	-0.6011	0.54776	0.891345	Plasma blood
ACOT8	20	44470360	44486045	0.237728	0.601	0.5479	0.891345	Brain
CHMP1A	16	89710839	89724253	0.09802	0.600753	0.548	0.891345	Brain
SPARC	5	151661096	151686975	0.00856	0.6007	0.548	0.891345	Plasma blood
KRT1	12	52674736	52680407	0.005531	0.5998	0.54861	0.891345	Plasma blood
CDS2	20	5107432	5178533	0.03821	0.6	0.5487	0.891345	Brain
APOH	17	64208151	64252643	0.04076	0.5997	0.548737	0.891345	Brain
LXN	3	158363611	158390482	0.139995	-0.59942	0.54889	0.891345	Brain
ALPPL2	2	232406844	232410714	0.0059	0.5971	0.55044	0.891345	Plasma blood
VAT1L	16	77822427	78014004	0.227658	0.596622	0.55076	0.891345	Brain
PTGFRN	1	117452679	117532980	0.01779	-0.59675	0.551	0.891345	Brain
COX20	1	244998624	245008359	-0.00169	-0.59618	0.551	0.891345	Brain
PLCD1	3	38048987	38071253	0.0374	-0.596	0.55118	0.891345	Brain
CCDC126	7	23597382	23644708	0.092782	-0.5949	0.55192	0.891345	Plasma blood
D2HGDH	2	242673994	242708231	0.033174	-0.59467	0.552063	0.891345	Brain
CD38	4	15779898	15854853	0.362	-0.59442	0.5522	0.891345	Brain
TXNDC15	5	134874371	134901635	0.052	-0.5936	0.5528	0.891345	Plasma blood
GOLM1	9	86026146	86100173	0.0181	0.5932	0.55307	0.891345	Plasma blood
RBP7	1	9997206	10016021	0.106	0.5909	0.55456	0.891345	Plasma blood
ADAM22	7	87934143	88202889	0.099121	-0.5909	0.55459	0.891345	Plasma blood
IL10RB	21	33266367	33310187	0.02472	0.5898	0.555	0.891345	Plasma blood
MTERFD2	2	242011584	242041747	0.156859	-0.58991	0.55525	0.891345	Brain
RAB6B	3	133824235	133895882	0.125	0.58962	0.5554	0.891345	Plasma blood
FARSB	2	223435255	223521056	0.125	0.58954	0.555502	0.891345	Brain
REN	1	204154819	204190324	0.012	-0.5885	0.55618	0.891345	Plasma blood
HLA-DRB1	6	32546546	32557625	0.0603	-0.5877	0.55672	0.891345	Brain
PSG1	19	42866464	42879822	0.006225	-0.58755	0.5568	0.891345	Plasma blood
ECI2	6	4115693	4135597	0.08395	0.58722	0.55705	0.891345	Plasma blood
FCRL1	1	157794403	157820120	0.0829	0.5868	0.55733	0.891345	Plasma blood
SIGLEC14	19	51642553	51646801	0.214229	-0.58616	0.5578	0.891345	Plasma blood
FOLR3	11	72114869	72139892	0.177043	-0.5862	0.558	0.891345	Plasma blood
EML4	2	42396490	42559688	0.127078	-0.58576	0.558039	0.891345	Brain
GSTM3	1	109733932	109741038	0.0945	-0.5852	0.55843	0.891345	Plasma blood
PCYOX1	2	70257386	70281185	0.22805	0.5846	0.55879	0.891345	Plasma blood
ENTPD2	9	139942550	139948497	0.0178	-0.585	0.559	0.891345	Brain
RNASET2	6	166922113	166957191	0.09817	-0.58409	0.55916	0.891345	Plasma blood
PGGT1B	5	114546527	114598569	0.08058	0.5831	0.559799	0.891345	Brain
FCER2	19	7688758	7702146	0.046932	0.58311	0.5598	0.891345	Plasma blood
DYSF	2	71680852	71913898	0.036445	-0.58207	0.56052	0.891345	Brain
IGFBP7	4	57030773	57110385	0.101743	0.58158	0.5608	0.891345	Plasma blood
CBL	11	119206298	119313926	0.062861	-0.5815	0.561	0.891345	Plasma blood
NUDT9	4	87422573	87459455	0.047193	0.58136	0.561	0.891345	Plasma blood
GLIPR2	9	36136536	36163913	0.04861	0.5805	0.56155	0.891345	Plasma blood
APOA5	11	116789367	116792420	0.21183	0.5803	0.562	0.891345	Plasma blood
HLCS	21	38123189	38362536	0.00901	-0.579	0.56253	0.891345	Brain
CCL5	17	35871491	35880793	0.107	0.578521	0.5629	0.891345	Plasma blood
LYPLA2	1	24117460	24122029	0.00956	-0.57776	0.563	0.891345	Brain
SLC24A4	14	92788925	92962596	0.00943	0.57876	0.563	0.891345	Brain
PPM1A	14	60245752	60299087	0.002548	0.5769	0.56399	0.891345	Plasma blood
FAM3B	21	41304212	41357727	0.044	-0.5769	0.564	0.891345	Plasma blood
DDX19A	16	70346861	70373383	0.02909	0.57671	0.56413	0.891345	Plasma blood
VOPP1	7	55436056	55572988	0.014339	-0.5767	0.56416	0.891345	Plasma blood
PLSCR1	3	146232967	146262651	-0.001841	-0.57592	0.56467	0.891345	Brain
KNG1	3	186717348	186744410	0.0462	0.57591	0.5647	0.891345	Plasma blood
SEMA5A	5	9035033	9546075	0.145	0.5759	0.5647	0.891345	Plasma blood
PLCG2	16	81739097	81962685	0.02466	-0.57553	0.56493	0.891345	Plasma blood
CRISPLD2	16	84819985	84920768	0.00366	-0.57478	0.56544	0.891345	Plasma blood
PTGDS	9	136975092	136981742	0.03471	0.5745	0.56566	0.891345	Plasma blood
NUP210	3	13357737	13461809	0.00928	-0.57384	0.56608	0.891345	Brain
UBA2	19	34919257	34960853	0.047966	0.5703	0.5685	0.891345	Brain
DLD	7	107531415	107572175	0.04234	0.5698	0.56879	0.891345	Brain
MGST1	12	16500076	16762193	0.0559	0.56977	0.5688	0.891345	Brain
CPT1A	11	68522088	68611878	0.063304	-0.5701	0.569	0.891345	Brain
BBOX1	11	27062272	27149356	0.0617	-0.5692	0.569	0.891345	Brain
ITPA	20	3189514	3204516	0.138	-0.569	0.5693	0.891345	Brain
DPYSL4	10	134000404	134019280	0.5219	-0.56889	0.569431	0.891345	Brain
IGFBP2	2	216632828	216664436	0.00438	0.5688	0.5695	0.891345	Plasma blood
KLK11	19	51022216	51028039	0.164939	0.56868	0.5696	0.891345	Plasma blood
PTRH1	9	130455257	130487152	0.123	0.5687	0.57	0.891345	Brain
CST7	20	24949269	24959928	0.109636	0.56872	0.57	0.891345	Plasma blood
TRAPPC5	19	7745729	7747744	0.01711	-0.5675	0.5703	0.891345	Brain
PGLS	19	17511636	17521288	0.055315	-0.56746	0.5704	0.891345	Plasma blood
C17orf62	17	80400465	80408705	0.0323	0.5675	0.570401	0.891345	Brain
FAM171A1	10	15253642	15413061	0.02032	0.56725	0.570542	0.891345	Brain
C1QC	1	22643633	22648110	0.069	-0.5668	0.57082	0.891345	Plasma blood
ANO3	11	26210829	26684835	0.298	0.5671	0.571	0.891345	Brain
SCFD1	14	31091318	31205018	-0.000707	0.56621	0.571	0.891345	Brain
RAB8A	19	16222439	16245044	0.353438	0.5661	0.5713	0.891345	Brain
TYW5	2	200794698	200820459	0.06002	-0.56538	0.571813	0.891345	Brain
ENO1	1	8921061	8939308	0.0194	-0.56473	0.572	0.891345	Brain
NARS2	11	78147007	78285919	0.0065	-0.5646	0.572	0.891345	Brain
FAM120B	6	170599791	170716153	0.112	-0.5639	0.57282	0.892123	Brain
AACS	12	125549925	125627873	0.087577	-0.5628	0.5736	0.89224	Brain
TTLL12	22	43562628	43583139	0.194	0.5624	0.5739	0.89224	Brain
SLC30A9	4	41992489	42092474	0.07137	-0.56217	0.574	0.89224	Brain
VPS36	13	52986737	53024763	0.150028	-0.5614	0.5745	0.89224	Brain
RCHY1	4	76404247	76439974	0.044124	-0.56151	0.5745	0.89224	Brain
TXN	9	113006091	113018920	0.104699	0.5607	0.575	0.892518	Brain
SNX32	11	65601112	65624367	0.06512	0.5593	0.576	0.892637	Brain
EML1	14	100204030	100408397	0.21939	-0.55961	0.576	0.892637	Brain
CORO7	16	4404543	4475706	0.222	-0.559177	0.57604	0.892637	Brain
GMPPB	3	49754277	49761384	0.065877	-0.55851	0.5765	0.892852	Brain
CPNE3	8	87497059	87573726	0.07716	0.5568	0.5776	0.892977	Brain
MADD	11	47290712	47351582	0.225702	-0.5556	0.578	0.892977	Brain
MAX	14	65006174	65102695	0.069752	0.5563	0.578	0.892977	Plasma blood
AMY2A	1	103617427	103758726	0.0733	0.556	0.57818	0.892977	Plasma blood
MYOM2	8	1993155	2113475	0.10842	0.5553	0.5787	0.892977	Brain
ERC1	12	1099675	1605099	0.169	-0.55484	0.579	0.892977	Brain
CBR3	21	36135079	36146562	0.32543	0.5554	0.579	0.892977	Plasma blood
OXNAD1	3	16306706	16391806	0.30734	0.55462	0.57915	0.892977	Brain
CASP3	4	184627696	184649509	0.11319	-0.55404	0.5796	0.89311	Plasma blood
NLRX1	11	119037277	119054725	0.015676	0.5534	0.58	0.89311	Brain
SEMA3G	3	52433035	52445103	0.0358	0.55315	0.5802	0.89311	Plasma blood
NUDT16	3	131100515	131107674	0.393932	0.55212	0.58087	0.893646	Brain
TIMP4	3	12153068	12158912	0.0861	-0.54918	0.5829	0.895931	Plasma blood
C9	5	39284140	39424868	0.0222	0.5491	0.583	0.895931	Plasma blood
PRDX1	1	45510914	45542732	0.0443	-0.5477	0.58387	0.895982	Plasma blood
ALPL	1	21835858	21904905	0.0422	-0.54766	0.584	0.895982	Brain
HBG2	11	5274420	5667019	0.122256	-0.5478	0.584	0.895982	Brain
ACOT4	14	74058410	74063200	0.0632	0.54541	0.585	0.896569	Brain
ADPRHL1	13	114076260	114107839	0.18	-0.5456	0.5854	0.896569	Brain
CCDC50	3	191329085	191398659	0.00938	0.54473	0.5859	0.896569	Plasma blood
SFXN3	10	102790991	102800998	0.178657	0.54472	0.585944	0.896569	Brain
XRCC1	19	44047192	44084625	0.054975	-0.5441	0.5863	0.896569	Brain
RASGRF1	15	79252289	79383115	0.151	0.5437	0.586617	0.896569	Brain
ROBO1	3	78646390	79816965	0.00765	0.54371	0.58664	0.896569	Brain
MYOC	1	171635417	171652688	0.0918	-0.5431	0.58706	0.896718	Plasma blood
PGAM2	7	44062727	44065567	0.003559	0.5421	0.58775	0.897279	Plasma blood
ALDH7A1	5	125877533	125931110	0.0244	0.5402	0.589061	0.898598	Brain
EDDM3A	14	20745887	20748380	0.008686	-0.5393	0.58971	0.898598	Plasma blood
CHST11	12	104455295	104762014	0.135637	0.5384	0.59028	0.898598	Plasma blood
SBF1	22	50883429	50913454	0.0411	0.5378	0.5907	0.898598	Brain
EPHX1	1	225997794	226033260	0.030335	0.53711	0.591	0.898598	Brain
PSEN1	14	73603126	73690399	0.063837	-0.53668	0.591	0.898598	Brain
ADGRE2	19	14732392	14778560	0.085624	-0.53743	0.591	0.898598	Plasma blood
DECR1	8	91013633	91064320	0.0798	0.537	0.5912	0.898598	Brain
WARS	14	100333790	100376805	0.148254	-0.5359	0.59204	0.899337	Plasma blood
F10	13	113122799	113149529	0.03809	-0.5349	0.59275	0.899337	Plasma blood
FLNB	3	57994127	58157982	0.011215	0.53477	0.59281	0.899337	Brain
HSPB1	7	76302673	76304295	0.241565	0.5345	0.59298	0.899337	Plasma blood
LIFR	5	38474668	38608354	0.0276	-0.5336	0.5936	0.899395	Plasma blood
HOGA1	10	99344080	99372559	0.05904	0.53346	0.593715	0.899395	Brain
MRPL10	17	45900638	45908900	0.017417	-0.5331	0.593989	0.899395	Brain
GMPR	6	16238587	16295549	0.42834	0.53062	0.59568	0.901125	Plasma blood
PLXNC1	12	94148577	94307675	0.143891	0.5305	0.59578	0.901125	Plasma blood
ROR2	9	91563091	91950228	0.04988	0.5294	0.5965	0.901724	Plasma blood
AGPS	2	178257372	178408564	0.324011	-0.52862	0.597066	0.902066	Brain
CAMK2G	10	75572259	75634343	0.04861	0.52786	0.597594	0.902066	Brain
NAPRT1	8	144656955	144660819	0.0287	-0.5276	0.5977	0.902066	Brain
PEX6	6	42931608	42946958	0.0168	0.5271	0.59813	0.902165	Brain
CPN2	3	194339768	194351328	0.229	0.52623	0.5987	0.902165	Plasma blood
LIG3	17	33307513	33332083	0.54182	-0.5262	0.598739	0.902165	Brain
CCDC6	10	61548521	61666414	0.036139	-0.52574	0.599066	0.902169	Brain
FUT5	19	5865826	5870540	0.113488	-0.52381	0.6004	0.9035	Plasma blood
MBOAT7	19	54677107	54693733	0.0032	-0.5236	0.6006	0.9035	Brain
IFNAR1	21	33324429	33359864	0.2283	-0.5225	0.601	0.903539	Plasma blood
MYO18A	17	27400528	27507430	0.0187	-0.5226	0.601276	0.903539	Brain
SELO	22	50639408	50656045	0.0128	0.5212	0.6022	0.904401	Brain
RRM2B	8	103216730	103251346	-0.000139	0.5208	0.6025	0.904401	Brain
HPGDS	4	94298535	94342876	0.153231	0.51958	0.6034	0.904924	Plasma blood
LIN7A	12	81186299	81331704	0.008242	-0.5194	0.6035	0.904924	Brain
RBM17	10	6089034	6117457	0.037729	-0.51778	0.60461	0.905762	Plasma blood
APEX1	14	20455191	20457772	0.020134	-0.5176	0.60471	0.905762	Plasma blood
EPDR1	7	37723446	37991543	0.047578	-0.5158	0.606	0.906926	Brain
GXYLT1	12	42081845	42144874	0.076779	-0.5156	0.60614	0.906926	Plasma blood
TIMM44	19	7991603	8008805	0.02413	-0.5129	0.608	0.907915	Brain
APOL3	22	36140330	36166177	0.311155	-0.5125	0.60827	0.907915	Plasma blood
LCMT1	16	25123050	25189552	0.0595	0.51203	0.60863	0.907915	Brain
GPR180	13	95254157	95286899	0.10447	-0.512	0.6087	0.907915	Brain
CFD	19	859664	863641	0.014672	0.51178	0.6088	0.907915	Plasma blood
CPOX	3	98239976	98312567	0.06321	0.51177	0.60881	0.907915	Brain
PTPRS	19	5158495	5340803	0.001118	-0.51048	0.6097	0.907915	Plasma blood
LYPLAL1	1	219347186	219386207	0.038614	0.51	0.61	0.907915	Brain
C1orf27	1	186344890	186390510	0.34587	0.50965	0.61	0.907915	Brain
EPHX2	8	27348296	27403081	0.24	0.51	0.6101	0.907915	Brain
PSAPL1	4	7430285	7434930	0.095429	-0.50916	0.6106	0.907915	Plasma blood
C8G	9	136945185	136946975	0.12423	-0.5091	0.61072	0.907915	Plasma blood
IL1RL1	2	102311502	102352037	0.18228	0.5071	0.61211	0.908848	Plasma blood
ACOT7	1	6324329	6454451	0.0772	-0.50587	0.613	0.908848	Brain
WFDC2	20	45469753	45481532	0.003094	0.505143	0.613	0.908848	Plasma blood
RILPL1	12	123955925	124018265	0.0171	0.50445	0.6139	0.908848	Brain
CDH17	8	94127162	94217303	0.057239	-0.5045	0.61391	0.908848	Plasma blood
QPCTL	19	45692403	45703989	0.098341	0.50437	0.614	0.908848	Plasma blood
PLIN3	19	4838353	4867780	0.122	0.5042	0.6141	0.908848	Brain
MAP1LC3A	20	33134658	33148149	-0.000784	0.504	0.6142	0.908848	Brain
MTHFD1L	6	151186685	151423023	0.03298	-0.504	0.61429	0.908848	Brain
CHN2	7	29161890	29553944	0.03663	-0.5025	0.6153	0.909859	Brain
CYP7B1	8	65500320	65711318	0.000978	0.5012	0.6162	0.910052	Brain
MIPEP	13	24304328	24463558	-9.62e-05	0.5008	0.6165	0.910052	Brain
SNX5	20	17922241	17949623	0.02754	-0.501	0.6167	0.910052	Brain
RAB37	17	72666717	72743474	0.226084	0.5005	0.61674	0.910052	Brain
CD46	1	207752054	207795513	0.172	0.4996	0.61736	0.910483	Plasma blood
ST6GALNAC6	9	127885321	127905408	0.00197	-0.4989	0.61787	0.910695	Plasma blood
ADD1	4	2845584	2931803	0.0071	0.49817	0.6184	0.910695	Brain
ART3	4	76932337	77033955	0.166554	-0.49739	0.6189	0.910695	Brain
LYRM2	6	90277863	90348472	0.073535	-0.4967	0.61943	0.910695	Brain
C15orf38	15	90443159	90456188	0.589	0.4962	0.619785	0.910695	Brain
NID1	1	235975830	236065109	0.0245	0.4957	0.6201	0.910695	Plasma blood
SIRT5	6	13574816	13614790	0.08022	-0.4947	0.62083	0.910695	Brain
SEMA3E	7	83363238	83649139	0.246002	-0.4946	0.62087	0.910695	Plasma blood
GLUL	1	182378098	182392206	0.00499	-0.4945	0.62096	0.910695	Plasma blood
CYB5R1	1	202930997	202936408	0.00963	0.49497	0.621	0.910695	Brain
ARL3	10	104433488	104474164	0.085382	0.49406	0.621264	0.910695	Brain
MDGA1	6	37630679	37699306	0.50047	-0.49356	0.62162	0.910695	Plasma blood
ACSL1	4	185676749	185747972	0.0372	0.4921	0.6226	0.910695	Brain
CHMP2B	3	87227271	87255556	0.145	-0.49222	0.6226	0.910695	Plasma blood
TBC1D9B	5	179289066	179334859	0.0567	-0.4921	0.622668	0.910695	Brain
GSTO1	10	104235356	104267459	0.404319	-0.49151	0.62307	0.910695	Plasma blood
TMTC4	13	101256181	101327347	0.036517	-0.4911	0.6234	0.910695	Brain
CCDC136	7	128430811	128462186	0.112765	-0.491	0.6234	0.910695	Brain
DPH1	17	1933404	1946724	0.069535	-0.489	0.624866	0.912073	Brain
B4GALT6	18	31622246	31685836	0.168467	-0.4889	0.625	0.912073	Plasma blood
UBE3B	12	109915207	109974507	0.0333	-0.48619	0.6268	0.913673	Brain
DARS2	1	173793641	173827684	0.109319	0.48574	0.627	0.913673	Brain
PMM2	16	8788823	8862534	0.023	0.48532	0.62745	0.913673	Plasma blood
PTK2B	8	27168999	27316903	0.017004	0.4848	0.6278	0.913673	Brain
TMEM150C	4	83404323	83483510	0.33	0.48452	0.628	0.913673	Brain
ACAP2	3	194995465	195163807	0.0035	-0.48433	0.62815	0.913673	Brain
RPS9	19	54704610	54752862	-0.005028	-0.4828	0.6293	0.913673	Brain
NFASC	1	204828651	205022822	0.129	-0.4825	0.62944	0.913673	Plasma blood
LARGE	22	33162226	33922841	0.000198	-0.4818	0.62992	0.913673	Plasma blood
GNB1	1	1716729	1822495	0.013459	-0.48118	0.63	0.913673	Brain
SERPINB9	6	2887500	2903514	-0.0022	-0.4818	0.63	0.913673	Brain
GLCE	15	69160584	69272217	0.24089	0.4817	0.63004	0.913673	Plasma blood
SRSF9	12	120899471	120907596	0.024	0.48037	0.631	0.913941	Brain
SRPR	11	126132814	126139039	0.09045	0.479	0.632	0.913941	Brain
KDR	4	55078481	55125595	0.072418	0.47888	0.632	0.913941	Plasma blood
UBXN2B	8	59323823	59364060	0.128219	0.4788	0.6321	0.913941	Brain
LPA	6	160952515	161087407	-0.00259	0.4786	0.63222	0.913941	Brain
GAA	17	78075355	78093678	0.05485	0.4779	0.632727	0.913941	Brain
MET	7	116672196	116798377	0.01832	-0.4769	0.63346	0.913941	Plasma blood
ENO2	12	6913745	6923698	0.014454	-0.4765	0.6337	0.913941	Plasma blood
DSTYK	1	205111632	205180727	0.006658	-0.47596	0.634	0.913941	Brain
ABCC8	11	17414432	17498449	0.170485	-0.4764	0.634	0.913941	Brain
GAMT	19	1397091	1401569	0.0126	-0.4759	0.6341	0.913941	Brain
TTYH3	7	2671585	2704436	0.0982	0.4759	0.63417	0.913941	Brain
OSCP1	1	36881428	36916086	0.04237	0.47477	0.635	0.914334	Brain
ITIH1	3	52777595	52792068	0.224	0.47456	0.6351	0.914334	Plasma blood
CD200R1	3	112921205	112975103	0.0249	-0.47344	0.6359	0.915011	Plasma blood
SERPINA1	14	94376747	94390693	0.119226	-0.4727	0.63644	0.915315	Plasma blood
EPHB2	1	22710839	22921500	0.1	-0.4714	0.63738	0.916193	Plasma blood
PSMB4	1	151399560	151401937	0.152	0.4708	0.63776	0.916265	Plasma blood
SLC25A19	17	73269073	73285591	0.161	-0.4699	0.638401	0.916712	Brain
GALT	9	34638130	34651032	0.569	-0.4685	0.639	0.916841	Brain
PLXNA1	3	126707437	126756235	0.034558	-0.46889	0.63915	0.916841	Brain
NPTX2	7	98617285	98629869	0.037783	-0.4681	0.63972	0.916898	Plasma blood
C6orf57	6	71276620	71299272	0.03638	0.4679	0.63985	0.916898	Brain
FNDC3A	13	49550048	49783915	0.036577	-0.4663	0.641	0.918073	Brain
ENPP6	4	185009859	185142383	0.019029	0.46467	0.6422	0.919318	Brain
CLEC4G	19	7728958	7733906	0.0395	-0.46413	0.6426	0.919417	Plasma blood
ABCG2	4	89011416	89152474	0.031114	0.4629	0.6434	0.919944	Brain
FTO	16	53737875	54155853	0.05002	0.462626	0.64363	0.919944	Brain
NSUN2	5	6599352	6633404	0.149564	0.4611	0.644746	0.920524	Brain
VNN2	6	132743870	132763459	0.24884	0.46076	0.64497	0.920524	Plasma blood
MCTP1	5	94039446	94620279	0.04308	0.4607	0.645029	0.920524	Brain
SULT1A1	16	28616903	28634946	0.010204	-0.460119	0.64543	0.920624	Brain
RUFY1	5	178977559	179037027	0.082844	0.4586	0.646546	0.920973	Brain
AGT	1	230690776	230745576	0.0327	-0.4583	0.64675	0.920973	Plasma blood
PLEKHA6	1	204187979	204346793	0.19488	-0.45773	0.647	0.920973	Brain
PNKP	19	49859882	49878351	0.003347	-0.45797	0.647	0.920973	Plasma blood
LIPT2	11	74202757	74204778	0.03255	-0.457	0.648	0.921124	Brain
WWOX	16	78133310	79246564	0.00181	0.456471	0.64805	0.921124	Brain
LYRM5	12	25348150	25362579	0.104	0.45638	0.6481	0.921124	Brain
GNAZ	22	23412540	23467224	0.18368	-0.4553	0.6489	0.921789	Brain
LACTB	15	63413999	63434260	0.082996	0.4547	0.649336	0.921842	Brain
APOL2	22	36622256	36636000	0.004691	-0.4544	0.6496	0.921842	Brain
RWDD1	6	116892530	116918838	0.29559	-0.4511	0.6519	0.924304	Brain
DAB2IP	9	124329336	124547809	0.131894	0.4505	0.652	0.924304	Brain
CPXM1	20	2794074	2800627	0.245067	-0.449384	0.653	0.925244	Plasma blood
AMACR	5	33986283	34008220	0.06717	0.4491	0.653329	0.925244	Brain
BST1	4	15703065	15738313	0.392827	-0.44793	0.6542	0.925254	Plasma blood
COX17	3	119373360	119396301	0.02308	-0.44743	0.65456	0.925254	Brain
IL12B	5	159314780	159330487	0.147	-0.4472	0.6547	0.925254	Plasma blood
RAB7L1	1	205737114	205744588	0.413305	-0.44623	0.655	0.925254	Brain
FOLR2	11	72216601	72221950	0.00685	-0.4462	0.655	0.925254	Plasma blood
LIME1	20	62366815	62370456	0.0723	0.446	0.6557	0.925726	Brain
DSC2	18	31058840	31102522	0.046216	0.4452	0.656	0.925726	Plasma blood
ADK	10	74151202	74709963	0.001771	0.44417	0.65692	0.926197	Plasma blood
PHYHD1	9	131683174	131704320	0.0148	-0.4445	0.657	0.926197	Brain
SLC25A24	1	108676658	108743471	0.066	0.44312	0.658	0.926667	Brain
KIAA0391	14	35591052	35743271	0.43399	0.44304	0.658	0.926667	Brain
ALG1	16	5083703	5137380	0.486	0.441611	0.65877	0.927281	Brain
RDH13	19	55550476	55582659	0.040829	0.4408	0.6594	0.927609	Brain
PRDX6	1	173477330	173488815	0.0784	-0.4404	0.65967	0.927609	Plasma blood
NT5C1A	1	40124793	40137710	0.02223	-0.43852	0.661	0.928164	Brain
B3GAT3	11	62382768	62389647	0.02243	-0.4379	0.661	0.928164	Brain
ACSS1	20	24986868	25039616	0.165	-0.438	0.6614	0.928164	Brain
LILRA5	19	54307070	54313166	0.025155	-0.43796	0.6614	0.928164	Plasma blood
SERPINB13	18	63586989	63604639	0.013057	0.4375	0.662	0.928537	Plasma blood
IL16	15	81159575	81314058	0.28643	-0.4362	0.66269	0.928954	Plasma blood
CNTNAP2	7	146116002	148420998	0.228564	-0.4357	0.66303	0.928954	Plasma blood
UHRF1BP1L	12	100422233	100536626	0.0563	-0.43535	0.6633	0.928954	Brain
EIF2A	3	150264465	150302029	0.01902	0.43392	0.66435	0.929307	Brain
TRIM25	17	54965270	54991399	0.015611	0.4336	0.664556	0.929307	Brain
WISP2	20	44714844	44728509	0.057981	0.43261	0.665	0.929307	Plasma blood
SDHA	5	218356	256815	0.11	0.4304	0.666871	0.929307	Brain
PDGFRL	8	17576433	17644071	0.044175	-0.4303	0.667	0.929307	Plasma blood
NIPSNAP1	22	29950797	29977326	0.104561	0.4298	0.6673	0.929307	Brain
SH3PXD2B	5	171752185	171881527	0.096284	0.429	0.667892	0.929307	Brain
DUSP23	1	159750722	159752333	0.040072	0.4283	0.668	0.929307	Brain
GNG8	19	47137333	47137942	0.09449	-0.4281	0.6686	0.929307	Brain
RGMB	5	98768650	98798643	0.057	-0.4281	0.6686	0.929307	Plasma blood
ZFAND1	8	81701334	81732903	0.133522	0.428	0.66866	0.929307	Plasma blood
[truncated: 784 more rows]
