# Supplementary material for: Large-scale association analysis identified novel differentiated thyroid carcinoma risk loci by integrating transcriptome and proteome
Source: Research Square preprint supplement (doi:10.21203/rs.3.rs-6751995/v1), 2025-07-18
Supplement: Supplementary file 5 [file 8034b4aba331caa8796d9614.xlsx]

## Sheet: Contents
	Contents
	Supplementary Table 1	Genome-wide association study analysis result that are identified across all studies
	Supplementary Table 2	Transcriptome-wide association study results using thyroid-relevant tissues from GTEx including thyroid, whole blood, pituatary, and brain hypothalamus
	Supplementary Table 3	Result of Baysian colocalization analysis of transcriptome (eQTLs) with differentiated thyroid carcinoma (DTC)
	Supplementary Table 4	FOCUS fine mapping analysis results of DTC identified genes across 49 tissues
	Supplementary Table 5	Results of transcriptome-wide association study (TWAS) using all 49 available tissues from GTEx
	Supplementary Table 6	Results of transcriptome-wide association study (TWAS) using thyroid cancer tissue from TCGA databse
	Supplementary Table 7	Results of brain and plasma blood proteome-wide association study (PWAS) using ROSMAP and AIRC study
	Supplementary Table 8	Result of Baysian colocalization analysis of proteome (pQTL) with differentiated thyroid carcinoma (DTC)
	Supplementary Table 9	Gene Set Enrichment Analysis of pathways and biological processes associated with identified genes from GWAS, TWAS and PWAS
	Supplementary Table 10	Effect estimates used in the PRS model in the study group EPIC and EPITYHR
	Supplementary Table 11	Comparison of MR casual estimates between MVMR and IVW (different clumping thresholds)

## Sheet: S3
Supplementary Table 3. Result of Baysian colocalization analysis of transcriptome (eQTLs) with differentiated thyroid carcinoma (DTC)
PP0: no association
PP1: causal variant for GWAS only
PP2: causal variant for eQTL or pQTL only
PP3: two independent causal variants
PP4: a shared causal variants
			Transcriptome
chr	Gene	Tissue	PP0	PP1	PP2	PP3	PP4
1q41	TGFB2	Thyroid	2.69e-22	1.16e-12	1.63e-10	0.703	0.297
1q43	SDCCAG8	Thyroid	6.12e-18	2.8e-10	9.6e-09	0.439	0.561
	CEP170	Whole Blood	1.52e-16	6.95e-09	2.18e-08	0.998	0.00231
3q26.2	ACTRT3	Pituitary	1.21e-08	0.087	1.22e-08	0.0867	0.826
	LRRC34	Thyroid	2.6e-25	1.87e-18	1.39e-07	1	2.26e-05
	LRRIQ4	Pituitary	1.09e-07	0.78	2.41e-08	0.173	0.0462
	MECOM	Thyroid	1.75e-09	0.0126	1.12e-07	0.805	0.182
8p12	NRG1	Thyroid	8.65e-110	7.92e-78	1.97e-34	0.017	0.983
9q22.33	PTCSC2	Thyroid	8.75e-138	0.468	3.03e-138	0.161	0.371
	TRMO	Hypothalamus	5.05e-149	2.7e-12	1.87e-137	1	7.49e-13
	TRIM14	Thyroid	2.8e-91	0.297	6.51e-91	0.689	0.0144
	TMOD1	Thyroid	1.4e-137	0.746	4.46e-138	0.238	0.0157
	HEMGN	Thyroid	1.4e-138	0.0746	1.73e-137	0.924	0.00132
	CORO2A	Thyroid	3.77e-106	2.87e-16	1.32e-90	1	5.13e-17
	ANP32B	Whole Blood	1.44e-138	0.0771	1.73e-137	0.922	0.000923
9p22.1	HAUS6	Thyroid	3.13e-11	4.23e-06	7.38e-06	1	0.000299
	SAXO1 (FAM154A)	Pituitary	1.15e-06	0.155	7.06e-07	0.0948	0.75
10q24.33	STN1	Pituitary	4.78e-10	0.541	3.56e-11	0.0398	0.419
14q13.3	PTCSC3	Thyroid	1.58e-56	4.07e-16	3.87e-41	1	2e-08
14q22.2	SAMD4A	Thyroid	0.00448	0.00856	0.0235	0.044	0.92
15q22.33	SMAD3	Thyroid	3.83e-40	3.41e-26	5.75e-17	0.00412	0.996
	AAGAB	Whole Blood	9.4e-17	0.00836	9.34e-17	0.00732	0.984
15q15.1	RAD51-AS1	Thyroid	5.15e-06	0.0131	5.83e-05	0.147	0.84
	CHST14	Thyroid	3.32e-05	0.081	8.74e-05	0.212	0.706
	RMDN3	Hypothalamus	0.00034	0.849	3.65e-05	0.091	0.0597
	CCDC32	Thyroid	1.87e-53	4.75e-50	0.000109	0.275	0.725
16q23.2	MAFTRR	Hypothalamus	8.66e-07	0.671	4.04e-07	0.312	0.0169
	MPHOSPH6	Pituitary	6.63e-17	8.81e-16	0.00915	0.121	0.87
19p12	ZNF257	Whole Blood	1.82e-27	1.12e-22	1.03e-06	0.0623	0.938
