# Supplementary material for: Large-scale association analysis identified novel differentiated thyroid carcinoma risk loci by integrating transcriptome and proteome
Source: Research Square preprint supplement (doi:10.21203/rs.3.rs-6751995/v1), 2025-07-18
Supplement: Supplementary file 6 [file 914a034c29727a16ccb3e79f.xlsx]

## Sheet: Contents
	Contents
	Supplementary Table 1	Genome-wide association study analysis result that are identified across all studies
	Supplementary Table 2	Transcriptome-wide association study results using thyroid-relevant tissues from GTEx including thyroid, whole blood, pituatary, and brain hypothalamus
	Supplementary Table 3	Result of Baysian colocalization analysis of transcriptome (eQTLs) with differentiated thyroid carcinoma (DTC)
	Supplementary Table 4	FOCUS fine mapping analysis results of DTC identified genes across 49 tissues
	Supplementary Table 5	Results of transcriptome-wide association study (TWAS) using all 49 available tissues from GTEx
	Supplementary Table 6	Results of transcriptome-wide association study (TWAS) using thyroid cancer tissue from TCGA databse
	Supplementary Table 7	Results of brain and plasma blood proteome-wide association study (PWAS) using ROSMAP and AIRC study
	Supplementary Table 8	Result of Baysian colocalization analysis of proteome (pQTL) with differentiated thyroid carcinoma (DTC)
	Supplementary Table 9	Gene Set Enrichment Analysis of pathways and biological processes associated with identified genes from GWAS, TWAS and PWAS
	Supplementary Table 10	Effect estimates used in the PRS model in the study group EPIC and EPITYHR
	Supplementary Table 11	Comparison of MR casual estimates between MVMR and IVW (different clumping thresholds)

## Sheet: S6
Supplementary Table 6. Results of transcriptome-wide association study (TWAS) using thyroid cancer tissue from TCGA databse
R2: A cross-validated R2 of tissue model's correlation to gene's measured transcriptome (prediction performance)
Gene	chromosome	start_position	end_position	R2	TWAS.Z	TWAS.P	Cancer tissue
DIRC3	2	218148748	218621316	0.069	-13.5814	5.16e-42	Thyroid
NRG1	8	31497268	32622558	0.42	13.1828	1.1e-39	Thyroid
C9orf156	9	100666772	100684852	0.15	-12.8283	1.14e-37	Thyroid
NANS	9	100807889	100845364	0.035	-8.67734	4.05e-18	Thyroid
PCNXL2	1	233119882	233431459	0.14	-8.20836	2.24e-16	Thyroid
NCRNA00219	5	111496226	111498003	0.029	7.8627	3.76e-15	Thyroid
SMAD3	15	67358195	67487532	0.12	-7.57391	3.62e-14	Thyroid
HAUS6	9	19053142	19102902	0.11	-6.4572	1.07e-10	Thyroid
NFIA	1	61542946	61928459	0.032	-6.39	1.66e-10	Thyroid
KIAA1804	1	233463514	233520893	0.14	-5.79074	7.01e-09	Thyroid
CCDC32	15	40823540	40857252	0.29	5.55713	2.74e-08	Thyroid
DLG5	10	79550551	79686348	0.096	5.36236	8.21e-08	Thyroid
LRRC34	3	169511266	169530720	0.056	5.2713	1.35e-07	Thyroid
SAMD4A	14	55034637	55260033	0.13	4.76892	1.85e-06	Thyroid
EPB41L4A	5	111478138	111755010	0.015	-4.5158	6.31e-06	Thyroid
MPHOSPH6	16	82181768	82203829	0.16	4.4981	6.86e-06	Thyroid
FZD3	8	28351773	28421959	0.056	-4.44626	8.74e-06	Thyroid
ENOSF1	18	672544	712662	0.31	4.3485	1.37e-05	Thyroid
ZNF208	19	22115760	22193745	0.024	4.28972	1.79e-05	Thyroid
MECOM	3	168801287	169381563	0.07	4.2819	1.85e-05	Thyroid
SLC7A2	8	17354600	17428073	0.23	4.25309	2.11e-05	Thyroid
MEX3C	18	48700922	48723690	0.026	-4.1942	2.74e-05	Thyroid
WNT4	1	22443800	22470385	0.12	4.06306	4.84e-05	Thyroid
FBXO16	8	28285930	28347784	0.035	-4.01902	5.84e-05	Thyroid
NDUFS2	1	161169105	161184182	0.082	3.95162	7.76e-05	Thyroid
FAM22G	9	99690592	99704572	0.049	-3.92531	8.66e-05	Thyroid
RPS6KL1	14	75372347	75389958	0.17	3.89778	9.71e-05	Thyroid
SMC6	2	17845080	17981462	0.025	-3.8615	0.000113	Thyroid
MYCBPAP	17	48585745	48608861	0.13	-3.85268	0.000117	Thyroid
GPR135	14	59895740	59932059	0.048	3.78199	0.000156	Thyroid
DCTN5	16	23652807	23681182	0.35	3.7408	0.000183	Thyroid
C6orf227	6	33553883	33561115	0.073	-3.72095	0.000198	Thyroid
CGNL1	15	57668705	57842920	0.14	3.70525	0.000211	Thyroid
VAV3	1	108113782	108507545	0.05	-3.69226	0.000222	Thyroid
LOC100132354	6	43858765	43905943	0.079	-3.67585	0.000237	Thyroid
C16orf48	16	67696850	67700628	0.04	-3.6453	0.000267	Thyroid
RNASEH2B	13	51483892	51544594	0.21	-3.6115	0.000304	Thyroid
ADAL	15	43622872	43646094	0.21	3.52941	0.000416	Thyroid
CWF19L1	10	101992055	102027437	0.33	-3.47874	0.000504	Thyroid
PPP2R3C	14	35554679	35591679	0.25	-3.46416	0.000532	Thyroid
RNASE11	14	21051054	21058417	0.12	3.42972	0.000604	Thyroid
FAM177A1	14	35514113	35552587	0.074	3.41591	0.000636	Thyroid
PIBF1	13	73356230	73590589	0.067	-3.3436	0.000827	Thyroid
C14orf149	14	59939406	59951126	0.042	3.33675	0.000848	Thyroid
KLHL17	1	895967	901095	0.1	-3.30402	0.000953	Thyroid
DAGLB	7	6448748	6523849	0.029	-3.28575	0.00102	Thyroid
PPOX	1	161136181	161147801	0.032	3.23654	0.00121	Thyroid
SNED1	2	241938255	242033643	0.042	-3.22376	0.00127	Thyroid
NUDT4	12	93771701	93797022	0.026	3.19703	0.00139	Thyroid
PMAIP1	18	57567192	57571538	0.066	-3.1955	0.0014	Thyroid
IFT88	13	21141208	21265574	0.024	3.1914	0.001416	Thyroid
PRPF40A	2	153508109	153573975	0.022	3.1898	0.00142	Thyroid
WDR1	4	10075964	10118573	0.058	3.18172	0.00146	Thyroid
CEP250	20	34042996	34099802	0.042	3.17371	0.00151	Thyroid
CHEK2	22	29083731	29137822	0.031	-3.17149	0.00152	Thyroid
MARS	12	57881077	57911334	0.045	3.16254	0.00156	Thyroid
SEC31B	10	102246403	102289636	0.2	3.15925	0.00158	Thyroid
DDIT3	12	57910373	57914300	0.048	3.15081	0.00163	Thyroid
ACSL6	5	131142840	131347870	0.014	3.15019	0.00163	Thyroid
FLJ35024	9	2422702	2622373	0.086	3.15091	0.00163	Thyroid
SILV	12	56347890	56360458	0.11	-3.14053	0.00169	Thyroid
ANO10	3	43407819	43663560	0.035	-3.1366	0.00171	Thyroid
SGK223	8	8175259	8239257	0.22	-3.13573	0.00171	Thyroid
NCLN	19	3185875	3209572	6.2e-05	3.13025	0.00175	Thyroid
P4HA2	5	131528306	131563556	0.35	-3.12672	0.00177	Thyroid
CREB3L4	1	153940379	153946832	0.12	3.12192	0.0018	Thyroid
DNAJC21	5	34929698	34959068	0.15	3.10685	0.00189	Thyroid
LRRC33	3	196366656	196388872	0.065	-3.099	0.00194	Thyroid
GDF5	20	33897002	34042568	0.002	3.09028	0.002	Thyroid
ACSM5	16	20420856	20452278	0.037	-3.0764	0.0021	Thyroid
C16orf86	16	67700717	67702659	0.031	-3.0751	0.0021	Thyroid
C17orf44	17	8123949	8127361	0.01	3.03774	0.002384	Thyroid
TYMS	18	657604	673499	0.055	3.036	0.0024	Thyroid
NUP210L	1	153965170	154127592	0.049	3.03194	0.00243	Thyroid
DSTYK	1	205111632	205180727	0.055	3.02611	0.00248	Thyroid
LOC652276	16	2653385	2680495	0.052	-3.0152	0.00257	Thyroid
HHATL	3	42734156	42744319	0.022	-3.0149	0.00257	Thyroid
BNC1	15	83924655	83953468	0.1	-2.99819	0.00272	Thyroid
C17orf81	17	7155372	7163259	0.24	-2.99419	0.002752	Thyroid
LRRC36	16	67360747	67419108	0.04	2.9908	0.00278	Thyroid
FUT2	19	49199228	49209190	0.062	-2.99044	0.00279	Thyroid
SYT13	11	45261853	45307884	0.085	2.98156	0.00287	Thyroid
AKAP7	6	131456871	131604673	0.068	-2.98091	0.002874	Thyroid
XYLB	3	38388251	38456467	0.029	-2.9779	0.0029	Thyroid
ZAK	2	173940565	174132736	0.18	-2.94288	0.00325	Thyroid
EIF2AK4	15	40226347	40327797	0.089	2.93918	0.00329	Thyroid
CDC14B	9	99262397	99382112	0.078	-2.93218	0.00337	Thyroid
ZDHHC1	16	67428323	67450339	0.069	2.9135	0.00357	Thyroid
MMP15	16	58059282	58080802	0.025	-2.9002	0.00373	Thyroid
VAMP2	17	8062465	8066293	0.051	2.89914	0.003742	Thyroid
ST7	7	116593381	116870073	0.012	-2.89297	0.00382	Thyroid
CLDN7	17	7163223	7166512	0.058	2.89238	0.003823	Thyroid
FAM78A	9	134133466	134151906	0.034	-2.88039	0.00397	Thyroid
ZMPSTE24	1	40723733	40759855	0.064	2.8706	0.0041	Thyroid
ATM	11	108093559	108239826	0.053	-2.87035	0.0041	Thyroid
MRPL34	19	17416477	17417652	0.19	2.87045	0.0041	Thyroid
CPXM1	20	2774716	2781282	0.05	2.8586	0.00426	Thyroid
UQCC	20	33890383	33999833	0.21	-2.83865	0.00453	Thyroid
SEMA4D	9	91975706	92112888	0.011	-2.83789	0.00454	Thyroid
C1orf170	1	910579	917473	0.073	-2.83557	0.00457	Thyroid
PPDPF	20	62152133	62153523	0.04	-2.83135	0.00464	Thyroid
SLC9A2	2	103236166	103327807	0.016	-2.82902	0.00467	Thyroid
RNASE10	14	20973696	20979314	0.066	2.82567	0.00472	Thyroid
TUBA1C	12	49621709	49667113	0.043	2.81668	0.00485	Thyroid
SLC5A11	16	24857316	24922943	0.44	2.8115	0.00493	Thyroid
LOC100188949	13	30914409	30948036	0.08	2.8094	0.004964	Thyroid
CAMK2N2	3	183977003	183979251	0.032	-2.776	0.0055	Thyroid
AMICA1	11	118064442	118095809	0.072	2.77389	0.00554	Thyroid
JAK1	1	65298906	65432619	0.063	2.75991	0.00578	Thyroid
GSTA1	6	52656179	52668664	0.062	2.75567	0.005857	Thyroid
ITPR3	6	33589161	33664346	0.045	-2.74893	0.005979	Thyroid
LOC100131193	9	139698379	139703300	0.028	-2.74692	0.00602	Thyroid
C4orf50	4	5958845	5990166	0.05	2.73199	0.0063	Thyroid
TMED2	12	124069076	124082681	0.034	-2.72488	0.00643	Thyroid
UROS	10	127477148	127511837	0.34	-2.72422	0.00645	Thyroid
NMT1	17	43138680	43186380	0.2	-2.70217	0.006889	Thyroid
TDH	8	11197146	11225961	0.087	-2.69817	0.00697	Thyroid
ZNF98	19	22573899	22605148	0.2	2.6963	0.00701	Thyroid
CAPZB	1	19665274	19811992	0.073	-2.69494	0.00704	Thyroid
LAMB2L	3	49190293	49191834	0.071	-2.6951	0.00704	Thyroid
ZNF213	16	3185057	3192804	0.018	-2.6874	0.0072	Thyroid
SPTLC1	9	94793420	94877690	0.073	2.68477	0.00726	Thyroid
C17orf42	17	29226001	29233286	0.042	-2.67791	0.007408	Thyroid
MYO7B	2	128293378	128395302	0.034	2.67546	0.00746	Thyroid
C9orf70	9	3898646	3901247	0.045	2.6724	0.00753	Thyroid
GPR17	2	128403439	128410212	0.083	2.66785	0.00763	Thyroid
PIGL	17	16120509	16229572	0.026	-2.66523	0.007693	Thyroid
ZNF695	1	247108854	247242069	0.096	-2.64565	0.00815	Thyroid
IFI27L1	14	94547639	94569059	0.052	2.64354	0.0082	Thyroid
DULLARD	17	7146906	7155400	0.19	2.64367	0.008201	Thyroid
ADAM28	8	24151580	24212725	0.029	2.63818	0.00834	Thyroid
LY75	2	160625141	160761262	0.16	2.63683	0.00837	Thyroid
TTC12	11	113185251	113244016	0.51	2.63625	0.00838	Thyroid
LHX2	9	126773889	126795442	0.025	2.62806	0.00859	Thyroid
ATAD5	17	29159023	29222295	0.022	2.6245	0.008678	Thyroid
FREM2	13	39261173	39461265	0.015	2.6235	0.008703	Thyroid
WDR7	18	54318616	54697036	0.033	-2.6215	0.00875	Thyroid
CRLF3	17	29109703	29151778	0.077	-2.62032	0.008785	Thyroid
DDX55	12	124086672	124105483	0.24	2.61909	0.00882	Thyroid
ULBP1	6	150285143	150294844	0.058	-2.61409	0.008946	Thyroid
AMAC1L2	8	11188495	11189695	0.05	-2.61128	0.00902	Thyroid
ZNF205	16	3162563	3170516	0.02	2.6099	0.00906	Thyroid
LAMC1	1	182992595	183114726	0.05	2.60769	0.00912	Thyroid
IRF1	5	131776132	131831259	0.025	-2.60583	0.00917	Thyroid
EPHB6	7	142552792	142568845	0.24	-2.60534	0.00918	Thyroid
NRSN1	6	24126414	24147757	0.078	2.60448	0.009201	Thyroid
PROC	2	128176017	128186816	0.18	2.60104	0.00929	Thyroid
GPR125	4	22388999	22517672	0.013	-2.59787	0.00938	Thyroid
ETAA1	2	67624442	67637533	0.074	2.59615	0.00943	Thyroid
ABHD8	19	17402941	17414282	0.12	-2.59142	0.00956	Thyroid
RP1	8	55528627	55682531	0.036	-2.58707	0.00968	Thyroid
DHX32	10	127524909	127585027	0.17	-2.57919	0.0099	Thyroid
CDCA7L	7	21940518	21985542	0.075	2.57665	0.00998	Thyroid
INSIG2	2	118846050	118867596	0.025	2.57227	0.0101	Thyroid
NFYC	1	41157242	41237273	0.091	-2.56998	0.0102	Thyroid
SAA1	11	18287772	18291526	0.009	-2.54417	0.01095	Thyroid
TTC23	15	99676529	99791428	0.26	2.54272	0.011	Thyroid
RAD1	5	34905367	34918383	0.016	2.53514	0.0112	Thyroid
IZUMO1	19	49244147	49250166	0.047	-2.53259	0.0113	Thyroid
TMED7-TICAM2	5	114914340	114961870	0.054	2.53323	0.0113	Thyroid
CAPN8	1	223714972	223853436	0.2	-2.52247	0.0117	Thyroid
ORMDL3	17	38077296	38083854	0.15	2.51735	0.011824	Thyroid
MPZL3	11	118100337	118123011	0.065	2.51533	0.01189	Thyroid
PPP1R3B	8	8993774	9009084	0.029	-2.51138	0.012	Thyroid
HEY2	6	126068780	126082414	0.04	2.50949	0.012091	Thyroid
C20orf112	20	31030864	31124200	0.022	-2.50828	0.01213	Thyroid
FSCN2	17	79495417	79504155	0.081	-2.50324	0.012306	Thyroid
EBF4	20	2673524	2740753	0.039	2.49927	0.01244	Thyroid
SMYD4	17	1682830	1733175	0.086	-2.48966	0.012786	Thyroid
CECR7	22	17517460	17539682	0.13	-2.48233	0.01305	Thyroid
DNASE1	16	3702940	3708095	0.015	2.4727	0.0134	Thyroid
FER1L4	20	34146508	34195484	0.046	2.46844	0.01357	Thyroid
PITRM1	10	3179116	3215003	0.39	-2.46289	0.0138	Thyroid
MDH1B	2	207598943	207630050	0.095	-2.46329	0.0138	Thyroid
KRT1	12	53068520	53074191	0.094	-2.45742	0.01399	Thyroid
SLC9A8	20	48429250	48508772	0.13	2.44599	0.01445	Thyroid
EDARADD	1	236557680	236648008	0.069	-2.44319	0.0146	Thyroid
GPR132	14	105515738	105531754	0.072	2.44094	0.0146	Thyroid
SERINC5	5	79407474	79551870	0.13	2.4387	0.0147	Thyroid
BNIP2	15	59955064	59981642	0.045	2.43784	0.0148	Thyroid
AQP11	11	77300436	77320691	0.15	2.43681	0.01482	Thyroid
PDGFB	22	39619687	39640957	0.027	-2.43571	0.01486	Thyroid
PWP1	12	108079590	108106257	0.036	2.43435	0.01492	Thyroid
AKR7A2	1	19630459	19638640	0.047	2.42702	0.0152	Thyroid
GINS3	16	58426298	58440047	0.017	2.4279	0.0152	Thyroid
FBLL1	5	167956582	167957638	0.41	-2.42709	0.0152	Thyroid
KTELC1	3	119187785	119213552	0.16	-2.4215	0.0155	Thyroid
NT5C3L	17	39981424	39992491	0.076	2.41283	0.015829	Thyroid
LOC149134	1	246939315	246955685	0.045	-2.41088	0.0159	Thyroid
RAF1	3	12625102	12705700	0.075	2.4055	0.0162	Thyroid
PRR5-ARHGAP8	22	45098083	45258662	0.094	2.39917	0.01643	Thyroid
IQGAP1	15	90931473	91045475	0.08	2.39664	0.0165	Thyroid
SHC4	15	49115934	49255641	0.049	-2.39614	0.0166	Thyroid
PROCR	20	33758727	33765164	0.08	-2.39433	0.01665	Thyroid
ASGR1	17	7076752	7082883	0.035	-2.39094	0.016805	Thyroid
C1orf77	1	153606525	153618775	0.06	2.38941	0.0169	Thyroid
HELLS	10	96305543	96361855	0.028	-2.38663	0.017	Thyroid
PNP	14	20937542	20945246	0.058	2.38553	0.0171	Thyroid
ZNF626	19	20802745	20844402	0.035	2.38383	0.0171	Thyroid
ZNF761	19	53935227	53961514	0.045	2.38527	0.0171	Thyroid
C1orf115	1	220863628	220872499	0.12	-2.37411	0.0176	Thyroid
NSFL1C	20	1422813	1448417	0.05	-2.37333	0.01763	Thyroid
ATP6V0A2	12	124196865	124246299	0.21	-2.37015	0.01778	Thyroid
PSMG2	18	12658738	12725737	0.17	2.3688	0.0178	Thyroid
GPR35	2	241544848	241570675	0.069	-2.36472	0.018	Thyroid
SUGT1	13	53226831	53262433	0.021	-2.3637	0.018094	Thyroid
TXNDC9	2	99923088	99957165	0.052	-2.36439	0.0181	Thyroid
MKRN2	3	12598594	12625208	0.14	-2.3621	0.0182	Thyroid
ARL4A	7	12726481	12730556	0.039	-2.35828	0.01836	Thyroid
CBX6	22	39260264	39268258	0.03	-2.35523	0.01851	Thyroid
CDH15	16	89238163	89261899	0.11	2.3533	0.0186	Thyroid
NTN5	19	49164666	49176264	0.093	2.34905	0.0188	Thyroid
FAM154B	15	82555152	82577265	0.36	-2.3468	0.0189	Thyroid
CHERP	19	16628700	16653263	0.011	-2.34751	0.0189	Thyroid
LIPT1	2	99771418	99779611	0.27	-2.34714	0.0189	Thyroid
PLCB4	20	9049701	9461460	0.11	-2.34265	0.01915	Thyroid
SPTBN5	15	42140345	42186275	0.059	2.34218	0.0192	Thyroid
CDA	1	20915444	20945398	0.2	-2.33762	0.0194	Thyroid
KIF2C	1	45205490	45233436	0.042	-2.3377	0.0194	Thyroid
COX11	17	53029259	53046064	0.23	-2.33286	0.019655	Thyroid
GSDMB	17	38060850	38074903	0.088	2.33039	0.019786	Thyroid
LOC100289341	9	139979398	139981269	0.19	-2.33072	0.0198	Thyroid
SNX1	15	64388177	64436431	0.13	-2.32748	0.0199	Thyroid
SNX22	15	64443916	64449680	0.072	-2.32748	0.0199	Thyroid
NUP107	12	69080731	69136472	0.036	2.31952	0.02037	Thyroid
LMAN2L	2	97371669	97405813	0.086	2.31857	0.0204	Thyroid
FAM71F2	7	128312346	128324299	0.03	-2.3182	0.02044	Thyroid
WBSCR27	7	73248921	73256855	0.61	-2.31732	0.02049	Thyroid
KIAA1033	12	105501492	105562904	0.06	-2.31709	0.0205	Thyroid
FTSJ3	17	61896795	61905031	0.28	-2.31636	0.020538	Thyroid
NT5E	6	86159302	86205496	0.041	2.31377	0.02068	Thyroid
PFAS	17	8152596	8173808	0.074	-2.31034	0.020869	Thyroid
MYST1	16	31128985	31142713	0.14	2.3096	0.0209	Thyroid
FRMD3	9	85857905	86153348	0.091	-2.30975	0.0209	Thyroid
APITD1	1	10490159	10512208	0.13	2.30544	0.0211	Thyroid
C3orf1	3	119217368	119243123	0.017	2.3051	0.0212	Thyroid
NUCB1	19	49403569	49426525	0.026	2.296	0.0217	Thyroid
TRPC4AP	20	33590215	33680618	0.028	2.29376	0.0218	Thyroid
C9orf69	9	139006428	139010731	0.063	-2.29452	0.0218	Thyroid
LPXN	11	58294346	58345693	0.094	2.2917	0.02192	Thyroid
PNPO	17	46018889	46026673	0.059	-2.28671	0.022213	Thyroid
LOC728606	18	24267585	24283602	0.54	2.2833	0.0224	Thyroid
METT5D1	11	28129798	28355054	0.017	-2.28183	0.0225	Thyroid
ANKK1	11	113258513	113271139	0.074	-2.27776	0.02274	Thyroid
CATSPER2	15	43922774	43959900	0.052	2.27094	0.0232	Thyroid
DPF3	14	73086004	73360809	0.071	-2.26786	0.0233	Thyroid
PRDM5	4	121615930	121844013	0.049	-2.26826	0.02331	Thyroid
SKAP1	17	46210802	46507594	0.067	-2.26723	0.023376	Thyroid
NKX2-1	14	36985606	36989416	0.046	-2.26708	0.0234	Thyroid
RAB11FIP3	16	475668	572480	0.02	2.2671	0.0234	Thyroid
ACVR2B	3	38495790	38534631	0.014	-2.2615	0.0237	Thyroid
ATG10	5	81267844	81551211	0.47	-2.26169	0.0237	Thyroid
KLRAQ1	2	48667908	48742524	0.2	-2.25323	0.0242	Thyroid
C2orf77	2	170501935	170550931	0.032	-2.25368	0.0242	Thyroid
CBR1	21	37442285	37445464	0.2	-2.25427	0.0242	Thyroid
PGF	14	75408540	75422291	0.0033	2.25275	0.0243	Thyroid
SSPN	12	26348269	26405853	0.041	2.24724	0.02463	Thyroid
C14orf147	14	34902145	34931468	0.018	2.24642	0.0247	Thyroid
FLJ40330	2	89065419	89106125	0.033	2.24392	0.0248	Thyroid
PRSS53	16	31094747	31106276	0.051	2.2417	0.025	Thyroid
FGFRL1	4	1004940	1020685	0.17	2.23793	0.02523	Thyroid
PSMD9	12	122326646	122355770	0.1	2.23437	0.02546	Thyroid
PIP5K1A	1	151171021	151222006	0.055	2.22923	0.0258	Thyroid
POLA2	11	65029432	65065087	0.067	2.2292	0.0258	Thyroid
PRPH2	6	42664334	42690358	0.49	2.22847	0.025849	Thyroid
CEND1	11	787110	790126	0.037	2.22691	0.02595	Thyroid
NID2	14	52471521	52535946	0.029	2.22573	0.026	Thyroid
MUTYH	1	45794915	45806142	0.28	-2.22499	0.0261	Thyroid
KIAA1107	1	92632609	92650279	0.028	2.22348	0.0262	Thyroid
ACACB	12	109554400	109706028	0.12	-2.21761	0.02658	Thyroid
USF1	1	161009042	161015757	0.017	2.21784	0.0266	Thyroid
APEH	3	49711435	49720933	0.032	-2.2168	0.0266	Thyroid
C1orf130	1	24882602	24935816	0.14	-2.21584	0.0267	Thyroid
SECISBP2L	15	49280967	49338630	0.065	2.21651	0.0267	Thyroid
ARPC1B	7	98972329	98992402	0.065	-2.21323	0.02688	Thyroid
CENPP	9	95087741	95377435	0.19	-2.21306	0.0269	Thyroid
VEGFC	4	177604691	177713895	0.034	2.20699	0.02731	Thyroid
C5orf32	5	139554653	139663118	0.084	-2.20136	0.0277	Thyroid
PRR15	7	29603427	29606911	0.25	2.1988	0.02789	Thyroid
EFCAB2	1	245133171	245288530	0.51	-2.19939	0.0279	Thyroid
FAM82B	8	87484579	87521009	0.04	2.19848	0.0279	Thyroid
PLEKHM1P	17	62775189	62833302	0.05	-2.19821	0.027934	Thyroid
PQLC2	1	19638740	19655793	0.021	2.19504	0.0282	Thyroid
BBOX1	11	27062509	27149354	0.026	2.19264	0.02833	Thyroid
ANKRD13B	17	27916801	27941778	0.19	2.19234	0.028355	Thyroid
CORO6	17	27941774	27948441	0.4	2.19234	0.028355	Thyroid
SSH2	17	27952965	28257018	0.18	2.19234	0.028355	Thyroid
PIK3R3	1	46505813	46642160	0.043	-2.1912	0.0284	Thyroid
LASS3	15	100940601	101084925	0.068	2.18983	0.0285	Thyroid
TEKT5	16	10721361	10788802	0.13	-2.1901	0.0285	Thyroid
CPSF1	8	145618447	145634733	0.18	2.18847	0.0286	Thyroid
HRCT1	9	35906189	35907138	0.024	-2.1883	0.0286	Thyroid
LOC339290	18	5238099	5246503	0.29	2.1882	0.0287	Thyroid
GIT1	17	27900487	27916610	0.055	2.18686	0.028752	Thyroid
TNFSF13	17	7461609	7464925	0.033	-2.18499	0.02889	Thyroid
LOC100128640	3	38492524	38496311	0.027	-2.1854	0.0289	Thyroid
DOC2A	16	30016837	30024843	0.03	-2.1785	0.0294	Thyroid
LRRC25	19	18501955	18508421	0.08	-2.17868	0.0294	Thyroid
TMEM163	2	135213331	135525334	0.18	2.17701	0.0295	Thyroid
DAB1	1	57463579	59012446	0.042	-2.1737	0.0297	Thyroid
CRISPLD2	16	84853587	84943116	0.0045	2.1692	0.0301	Thyroid
ACADM	1	76190043	76229353	0.057	2.16692	0.0302	Thyroid
FCGR2A	1	161475205	161493802	0.032	2.16758	0.0302	Thyroid
BEST4	1	45249259	45253426	0.13	2.16581	0.0303	Thyroid
ZNF43	19	21987753	22034830	0.025	2.16429	0.0304	Thyroid
GALNTL2	3	15935569	16271252	0.071	-2.1641	0.0305	Thyroid
JMY	5	78531954	78623036	0.044	-2.16319	0.0305	Thyroid
ZNF37B	10	43008963	43048280	0.027	2.15818	0.0309	Thyroid
C14orf101	14	57046338	57116230	0.075	-2.15717	0.031	Thyroid
ABCF3	3	183903863	183911795	0.021	2.1573	0.031	Thyroid
CFDP1	16	75327609	75467387	0.039	2.1531	0.0313	Thyroid
TLCD1	17	27051368	27053949	0.062	2.14468	0.031979	Thyroid
CNKSR1	1	26503981	26516373	0.19	-2.14464	0.032	Thyroid
FAM57B	16	30035749	30042186	0.059	-2.144	0.032	Thyroid
KIAA1161	9	34368908	34376894	0.012	2.14431	0.032	Thyroid
RAVER2	1	65210778	65298912	0.14	2.14196	0.0322	Thyroid
KLKB1	4	187148672	187179624	0.27	-2.13879	0.03245	Thyroid
RHCE	1	25688741	25756683	0.12	-2.13761	0.0325	Thyroid
ERAP2	5	96211644	96255398	0.69	-2.13713	0.0326	Thyroid
GCOM1	15	57884114	58009752	0.056	2.13484	0.0328	Thyroid
TIFA	4	113196783	113207059	0.14	-2.13426	0.03282	Thyroid
VPS16	20	2821373	2931390	0.044	2.13355	0.03288	Thyroid
QDPR	4	17488020	17513857	0.36	2.13245	0.03297	Thyroid
PRRC1	5	126853309	126890778	0.041	-2.1304	0.0331	Thyroid
AKAP3	12	4724677	4754343	0.41	2.13027	0.03315	Thyroid
METT10D	17	2319350	2415200	0.024	2.13002	0.03317	Thyroid
SNRPF	12	96252709	96260236	0.018	2.12675	0.03344	Thyroid
LPGAT1	1	211916800	212004114	0.054	-2.12611	0.0335	Thyroid
PHLDB3	19	43979256	44008985	0.15	-2.1259	0.0335	Thyroid
C20orf3	20	24943581	24973425	0.011	-2.12574	0.03353	Thyroid
PTCD2	5	71616200	71656036	0.025	-2.12428	0.0336	Thyroid
HSDL2	9	115142351	115234684	0.062	-2.12054	0.034	Thyroid
IGDCC4	15	65673825	65715410	0.0052	-2.11685	0.0343	Thyroid
POPDC2	3	119360908	119384171	0.02	2.1168	0.0343	Thyroid
CIAPIN1	16	57462087	57481369	0.047	2.1154	0.0344	Thyroid
C18orf10	18	34366472	34409158	0.42	-2.1145	0.0345	Thyroid
LEMD2	6	33738991	33756906	0.13	2.11364	0.034546	Thyroid
ITPRIPL1	2	96991062	96994090	0.024	-2.11163	0.0347	Thyroid
TCAM1P	17	61934376	61941738	0.081	2.11149	0.03473	Thyroid
VRK2	2	58134786	58387055	0.052	-2.10949	0.0349	Thyroid
TCTEX1D1	1	67218140	67244729	0.0085	-2.10822	0.035	Thyroid
BACH1	21	30671220	30734217	0.041	-2.10472	0.0353	Thyroid
NME1-NME2	17	49230920	49249104	0.12	2.10279	0.035484	Thyroid
AGPAT9	4	84457261	84527025	0.069	-2.09801	0.0359	Thyroid
CFHR3	1	196743930	196762872	0.31	2.0955	0.0361	Thyroid
METTL2B	7	128116783	128142977	0.26	-2.09561	0.03612	Thyroid
FAM26F	6	116782556	116784933	0.12	-2.09532	0.036142	Thyroid
TARS2	1	150459920	150479747	0.025	-2.09423	0.0362	Thyroid
MBLAC1	7	99724320	99726119	0.16	-2.092	0.03644	Thyroid
PUS7L	12	44122414	44152596	0.09	-2.09173	0.03646	Thyroid
SLC24A3	20	19193290	19703540	0.042	-2.09022	0.0366	Thyroid
AKT3	1	243651535	244006553	2.7e-05	2.08776	0.0368	Thyroid
PDCD5	19	33072104	33078322	0.099	2.08185	0.0374	Thyroid
GSTZ1	14	77787230	77797939	0.12	2.07806	0.0377	Thyroid
AP3B2	15	83328034	83378635	0.098	2.07711	0.0378	Thyroid
VASH1	14	77228235	77249363	0.03	2.07528	0.038	Thyroid
NOC2L	1	879584	894679	0.073	2.07384	0.0381	Thyroid
PLEKHN1	1	901877	910482	0.1	-2.07384	0.0381	Thyroid
ZNF358	19	7581004	7585911	0.022	-2.07398	0.0381	Thyroid
GLCCI1	7	8008423	8128707	0.092	2.06798	0.03864	Thyroid
WWTR1	3	149238033	149421115	0.063	-2.0664	0.0388	Thyroid
ZNF211	19	58131794	58154147	0.096	2.06047	0.0394	Thyroid
HPS1	10	100175956	100206704	0.037	2.0575	0.0396	Thyroid
GGA2	16	23475644	23521808	0.021	-2.0581	0.0396	Thyroid
RRP7B	22	42951347	42978017	0.03	2.05664	0.03972	Thyroid
AMZ1	7	2719163	2755069	0.2	2.05517	0.03986	Thyroid
DHDH	19	49436939	49448226	0.068	2.0541	0.04	Thyroid
KLHL10	17	39994043	40004597	0.059	-2.04652	0.040705	Thyroid
TM4SF4	3	149192434	149221068	0.11	-2.0455	0.0408	Thyroid
LOC100128164	3	169661774	169684522	0.2	2.0448	0.0409	Thyroid
PSMB5	14	23495061	23504429	0.075	-2.04253	0.0411	Thyroid
MRPL42P5	15	40823540	40846104	0.11	2.04174	0.0412	Thyroid
SNTB2	16	69221050	69342954	0.041	-2.0412	0.0412	Thyroid
KIAA1549	7	138516129	138666064	0.039	2.04076	0.04127	Thyroid
EARS2	16	23533335	23568696	0.1	-2.0403	0.0413	Thyroid
STRN4	19	47222770	47250251	0.18	-2.03884	0.0415	Thyroid
LOC221122	11	44995453	44999576	0.021	-2.03499	0.04185	Thyroid
NEO1	15	73344875	73597543	0.023	-2.03435	0.0419	Thyroid
ATP5O	21	35275758	35288158	0.027	-2.03415	0.0419	Thyroid
LOC149620	1	111823146	111828729	0.032	2.03243	0.0421	Thyroid
EIF3B	7	2394474	2420375	0.026	2.03147	0.04221	Thyroid
COPG2	7	130146080	130353598	0.3	-2.03079	0.04228	Thyroid
PYGO1	15	55838221	55881050	0.14	-2.0299	0.0424	Thyroid
FBLN7	2	112895962	112945791	0.012	2.02858	0.0425	Thyroid
HDLBP	2	242166679	242255254	0.058	-2.0263	0.0427	Thyroid
SYNJ2	6	158402919	158519568	0.015	-2.02289	0.043084	Thyroid
STARD5	15	81605014	81616524	0.0097	2.0225	0.0431	Thyroid
GPR63	6	97245889	97285353	0.045	-2.02228	0.043147	Thyroid
TSEN15	1	184020811	184043341	0.11	2.01808	0.0436	Thyroid
TTC3	21	38445571	38575406	0.24	2.01825	0.0436	Thyroid
GAA	17	78075355	78093678	0.059	2.01602	0.043798	Thyroid
S100A14	1	153586734	153588790	0.18	2.01467	0.0439	Thyroid
MOCS1	6	39872046	39902254	0.16	2.01085	0.044342	Thyroid
C6orf26	6	31730773	31732622	0.034	2.00967	0.044466	Thyroid
NMUR2	5	151771102	151784840	0.13	-2.00941	0.0445	Thyroid
ZNF212	7	148936774	148952681	0.07	2.00856	0.04458	Thyroid
CHST13	3	126243176	126262133	0.38	-2.0087	0.0446	Thyroid
ASCC1	10	73856278	73976892	0.083	-2.00779	0.0447	Thyroid
DMAP1	1	44679125	44686351	0.11	2.0057	0.0449	Thyroid
PSMD13	11	236808	252984	0.11	2.00561	0.0449	Thyroid
IPPK	9	95375466	95432547	0.041	-2.00336	0.0451	Thyroid
PABPC4L	4	135117491	135122903	0.035	1.99897	0.04561	Thyroid
NCOA6	20	33302579	33413433	0.019	-1.99844	0.04567	Thyroid
ZYG11A	1	53308183	53360247	0.034	1.9986	0.0457	Thyroid
SRA1	5	139929654	139937678	0.11	1.99692	0.0458	Thyroid
C19orf73	19	49621655	49622397	0.011	1.99627	0.0459	Thyroid
PAWR	12	79985747	80084790	0.035	-1.99581	0.04595	Thyroid
DCAKD	17	43100706	43138473	0.13	1.99451	0.046096	Thyroid
TOM1	22	35695268	35743985	0.026	-1.99414	0.04614	Thyroid
LOC80154	15	82944795	82975797	0.025	-1.99337	0.0462	Thyroid
OTOF	2	26680072	26781566	0.035	1.9928	0.0463	Thyroid
TBC1D20	20	416126	443187	0.041	-1.98614	0.04702	Thyroid
MLH3	14	75480467	75518235	0.2	1.98204	0.0475	Thyroid
ZNF492	19	22817126	22850472	0.12	-1.98067	0.0476	Thyroid
TBX6	16	30097117	30103208	0.15	1.9783	0.0479	Thyroid
CCDC90B	11	82972506	82997414	0.11	-1.97745	0.04799	Thyroid
WDR87	19	38375472	38397317	0.047	1.97702	0.048	Thyroid
IQUB	7	123092238	123174718	0.11	1.97669	0.04808	Thyroid
TMEM149	19	36230152	36236336	0.19	-1.97586	0.0482	Thyroid
CROCC	1	17066768	17299474	0.2	-1.97445	0.0483	Thyroid
PMF1	1	156182784	156209831	0.042	-1.97508	0.0483	Thyroid
STX8	17	9153789	9479275	0.15	1.97465	0.048308	Thyroid
ZDHHC8P1	22	23732793	23744799	0.19	-1.97334	0.04846	Thyroid
SIRPB2	20	1455236	1472233	0.14	1.97264	0.04854	Thyroid
MTRF1L	6	153308401	153323925	0.41	1.97165	0.04865	Thyroid
RAD51C	17	56769963	56811690	0.099	1.97125	0.048696	Thyroid
CCDC50	3	191046874	191116458	0.092	1.9709	0.0487	Thyroid
TARP	7	38299244	38357589	0.016	-1.97091	0.04873	Thyroid
PFDN1	5	139624635	139682689	0.025	-1.9673	0.0491	Thyroid
SECTM1	17	80278901	80291921	0.027	1.96656	0.049234	Thyroid
ERCC5	13	103459496	103528345	0.026	-1.9656	0.049342	Thyroid
MXI1	10	111967363	112047121	0.077	-1.96484	0.0494	Thyroid
CASP7	10	115438935	115490662	0.32	-1.96516	0.0494	Thyroid
BTBD1	15	83685183	83736106	0.04	-1.96251	0.0497	Thyroid
SUZ12P	17	29035714	29097067	0.24	-1.96199	0.049763	Thyroid
SUSD3	9	95820989	95847414	0.055	1.96197	0.0498	Thyroid
SIRT4	12	120740163	120751044	0.013	1.96134	0.04984	Thyroid
TMC3	15	81624760	81666418	0.093	1.95831	0.0502	Thyroid
MAP3K11	11	65365227	65381720	0.039	1.95619	0.05044	Thyroid
RRP15	1	218458629	218511323	0.25	1.95249	0.0509	Thyroid
GEN1	2	17935162	17966632	0.22	-1.9512	0.051	Thyroid
C17orf79	17	30178885	30186326	0.1	-1.95004	0.051171	Thyroid
COQ3	6	99817349	99842082	0.029	-1.94971	0.05121	Thyroid
PRR18	6	166719168	166721871	0.036	1.94905	0.051289	Thyroid
GPBP1L1	1	46092978	46152302	0.062	-1.94536	0.0517	Thyroid
PTGES2	9	130882973	130890712	0.015	-1.94489	0.0518	Thyroid
C6orf217	6	135818939	136037192	0.26	-1.94439	0.051848	Thyroid
LOC283856	16	56126899	56225006	0.09	-1.9444	0.0519	Thyroid
KALRN	3	123752542	124440035	0.22	-1.9437	0.0519	Thyroid
LRDD	11	799179	805245	0.07	1.9426	0.05207	Thyroid
SH2D4A	8	19171207	19253314	0.024	-1.94231	0.0521	Thyroid
HSPB9	17	40274756	40275371	0.052	1.94204	0.052132	Thyroid
TTC19	17	15902782	15932096	0.21	1.94086	0.052275	Thyroid
ACSS1	20	24986874	25039616	0.051	-1.93768	0.05266	Thyroid
TIMP2	17	76849063	76921472	0.015	-1.93575	0.052898	Thyroid
C4orf29	4	128886461	128957474	0.024	-1.93464	0.05303	Thyroid
C6orf163	6	88057220	88075180	0.047	-1.93413	0.053097	Thyroid
MEIS3P1	17	15690164	15693017	0.28	-1.93213	0.053343	Thyroid
NAT15	16	3493668	3536962	0.065	-1.9305	0.0535	Thyroid
C9orf125	9	104237609	104249475	0.15	-1.92994	0.0536	Thyroid
SEMA4A	1	156119810	156147534	0.07	1.9289	0.0537	Thyroid
CHRNA9	4	40337469	40356973	0.017	1.92767	0.0539	Thyroid
BTN2A2	6	26383354	26395098	0.067	1.92732	0.053939	Thyroid
GFM2	5	74017031	74063042	0.016	1.92681	0.054	Thyroid
DECR2	16	451858	462486	0.21	1.9234	0.0544	Thyroid
C6orf162	6	88032306	88052043	0.15	1.92269	0.054518	Thyroid
ZNF560	19	9577031	9609279	0.02	1.92201	0.0546	Thyroid
ZNF497	19	58865725	58874120	0.22	-1.92236	0.0546	Thyroid
C21orf67	21	46353200	46359828	0.1	-1.92232	0.0546	Thyroid
GATC	12	120884284	120897761	0.081	1.9214	0.05468	Thyroid
FCN3	1	27695603	27701315	0.03	1.92046	0.0548	Thyroid
MDH1	2	63816122	63834328	0.015	1.92015	0.0548	Thyroid
UBR7	14	93673401	93695555	0.042	1.91956	0.0549	Thyroid
ZNF300	5	150273964	150284391	0.011	1.91996	0.0549	Thyroid
RPAP1	15	41809377	41836464	0.18	-1.91652	0.0553	Thyroid
C4orf52	4	25915814	25931500	0.063	-1.9144	0.05557	Thyroid
SLC25A42	19	19174808	19223697	0.023	-1.91229	0.0558	Thyroid
FCGR3B	1	161592990	161601158	0.021	1.91081	0.056	Thyroid
LOC91316	22	23980677	24059610	0.0075	1.91069	0.05604	Thyroid
EIF3F	11	8008445	8017716	0.097	-1.90997	0.05614	Thyroid
LOC100129716	5	90676164	90716531	0.024	-1.90751	0.0565	Thyroid
POLR2J	7	102113548	102119381	0.03	-1.90332	0.057	Thyroid
CELSR1	22	46756731	46933067	0.17	-1.90238	0.05712	Thyroid
GSDMA	17	38119226	38134019	0.24	-1.90214	0.057153	Thyroid
ZSWIM7	17	15879877	15903006	0.46	-1.90092	0.057313	Thyroid
LOC646762	7	29685539	29724754	0.18	1.89965	0.05748	Thyroid
RPS8	1	45241246	45244411	0.047	-1.89942	0.0575	Thyroid
TRIM35	8	27142404	27168834	0.029	1.89986	0.0575	Thyroid
ZNF778	16	89284111	89299500	0.025	1.8988	0.0576	Thyroid
ADAM12	10	127700956	128077127	0.031	1.89705	0.0578	Thyroid
RPL7L1	6	42847671	42857596	0.011	-1.8965	0.057894	Thyroid
RNASEH2C	11	65485146	65488409	0.055	1.89579	0.05799	Thyroid
FAM162B	6	117073360	117086886	0.0094	1.89556	0.058018	Thyroid
C1orf88	1	111889195	111895639	0.089	-1.89081	0.0586	Thyroid
HYAL3	3	50330262	50336899	0.31	1.8902	0.0587	Thyroid
MYH10	17	8377532	8534036	0.043	-1.89011	0.058744	Thyroid
MDM1	12	68688346	68726161	0.2	-1.88937	0.05884	Thyroid
RGS14	5	176784844	176799598	0.19	1.88858	0.0589	Thyroid
CIB2	15	78396991	78423878	0.2	1.88844	0.059	Thyroid
OAZ3	1	151735445	151743805	0.052	-1.88664	0.0592	Thyroid
LOC100144603	22	51021455	51022353	0.094	-1.88636	0.05925	Thyroid
PRKD2	19	47177574	47220384	0.092	-1.88614	0.0593	Thyroid
MITF	3	69788633	70017486	0.094	1.8851	0.0594	Thyroid
LYSMD1	1	151132225	151138424	0.028	-1.88328	0.0597	Thyroid
BCCIP	10	127512104	127542263	0.01	-1.88306	0.0597	Thyroid
ATP6AP1L	5	81575281	81614146	0.42	-1.88206	0.0598	Thyroid
HBS1L	6	135281517	135376036	0.037	1.88129	0.059932	Thyroid
HS2ST1	1	87380335	87575680	0.017	1.88094	0.06	Thyroid
KANK3	19	8387469	8408146	0.025	1.88078	0.06	Thyroid
RPS23	5	81569141	81574235	0.25	1.87954	0.0602	Thyroid
NME2	17	49242891	49249104	0.13	-1.87528	0.060755	Thyroid
C22orf41	22	50989542	51001328	0.25	-1.87183	0.06123	Thyroid
SLC1A1	9	4490444	4587469	0.045	-1.86909	0.0616	Thyroid
HK2	2	75059782	75120474	0.1	1.86878	0.0617	Thyroid
C8orf38	8	95908040	96088396	0.075	-1.86796	0.0618	Thyroid
TBRG4	7	45139700	45151317	0.095	1.86716	0.06188	Thyroid
ZNF638	2	71503723	71662187	0.054	1.86614	0.062	Thyroid
LGALS12	11	63273524	63284246	0.1	-1.86362	0.06237	Thyroid
DSCC1	8	120846182	120868170	0.09	1.86371	0.0624	Thyroid
KIAA1529	9	100000779	100139569	0.024	-1.86334	0.0624	Thyroid
DHX36	3	153993458	154042286	0.19	-1.863	0.0625	Thyroid
THAP5	7	108202673	108210167	0.15	1.8608	0.06277	Thyroid
FAM57A	17	635847	646074	0.041	-1.86023	0.062853	Thyroid
BCR	22	23522552	23660223	0.075	1.8598	0.06291	Thyroid
C6orf72	6	149887528	149912067	0.033	-1.85938	0.062973	Thyroid
TPSD1	16	1306273	1308494	0.091	-1.8576	0.0632	Thyroid
RIOK2	5	96496572	96519005	0.095	1.85564	0.0635	Thyroid
ELL	19	18553475	18632937	0.085	-1.85478	0.0636	Thyroid
ADAMTS12	5	33527287	33892124	0.08	-1.85447	0.0637	Thyroid
SETD4	21	37406840	37451687	0.27	-1.85388	0.0638	Thyroid
FBP1	9	97365423	97402531	0.013	1.85354	0.0638	Thyroid
RPS3	11	75110562	75133322	0.082	-1.8524	0.06397	Thyroid
ZNF793	19	37997841	38034237	0.015	-1.85178	0.0641	Thyroid
SPRYD4	12	56862301	56864765	0.12	1.85072	0.06421	Thyroid
SEC23B	20	18488188	18542050	0.15	-1.85049	0.06424	Thyroid
ZNF181	19	35225151	35233774	0.21	-1.85032	0.0643	Thyroid
ANAPC4	4	25378848	25420119	0.027	1.84839	0.06455	Thyroid
HCG11	6	26521934	26527610	0.022	1.84742	0.064687	Thyroid
LPCAT2	16	55542913	55620581	0.0034	-1.8472	0.0647	Thyroid
SNX21	20	44462470	44471914	0.027	1.84699	0.06475	Thyroid
SLC1A4	2	65215579	65250997	0.036	1.84529	0.065	Thyroid
SLC16A7	12	59989848	60175407	0.033	-1.844	0.06518	Thyroid
PDE8B	5	76506706	76723226	0.033	-1.8441	0.0652	Thyroid
CUL7	6	43005356	43021654	0.072	1.84245	0.06541	Thyroid
SLC11A2	12	51373319	51422058	0.047	-1.84106	0.06561	Thyroid
C17orf67	17	54869275	54911256	0.023	-1.84054	0.065688	Thyroid
ATP4A	19	36041095	36054560	0.074	-1.84044	0.0657	Thyroid
SGTA	19	2754712	2783354	0.059	1.83913	0.0659	Thyroid
SLC1A5	19	47278142	47291842	0.12	-1.8387	0.066	Thyroid
ZC3H12D	6	149770878	149806030	0.025	-1.83816	0.066039	Thyroid
LLPH	12	66516850	66563807	0.46	1.83804	0.06606	Thyroid
IFFO2	1	19230774	19282826	0.12	-1.83712	0.0662	Thyroid
TH1L	20	57556311	57570186	0.11	1.83336	0.06675	Thyroid
HINT1	5	130494875	130501034	0.038	1.83224	0.0669	Thyroid
TMEM97	17	26646121	26655710	0.11	-1.83183	0.066976	Thyroid
CNTLN	9	17135038	17503915	0.12	-1.83147	0.067	Thyroid
ST14	11	130029682	130080256	0.054	-1.83127	0.06706	Thyroid
TYMP	22	50964184	50968514	0.052	-1.83069	0.06715	Thyroid
SMCR7	17	18163848	18169093	0.051	-1.82987	0.06727	Thyroid
ANO5	11	22214722	22304913	0.3	1.82851	0.06747	Thyroid
PIH1D1	19	49949550	49955115	0.095	1.82756	0.0676	Thyroid
PLEKHA8	7	30068288	30170096	0.023	-1.8272	0.06767	Thyroid
WDR63	1	85527993	85598820	0.018	-1.82713	0.0677	Thyroid
MRS2P2	12	72242076	72244763	0.021	-1.82632	0.0678	Thyroid
GLT25D2	1	183898796	184006878	0.042	1.82494	0.068	Thyroid
SNX15	11	64781586	64808042	0.049	-1.82341	0.06824	Thyroid
FGFBP3	10	93666346	93669258	0.024	-1.82273	0.0683	Thyroid
EIF2B2	14	75469612	75476292	0.05	1.82205	0.0684	Thyroid
GABRR1	6	89887223	89927496	0.22	1.82156	0.068522	Thyroid
DAAM1	14	59655399	59836471	0.1	1.82064	0.0687	Thyroid
B3GNT7	2	232260335	232265873	0.04	1.81801	0.0691	Thyroid
NTRK3	15	88419988	88799661	0.068	1.81658	0.0693	Thyroid
EXTL1	1	26348271	26362952	0.036	1.81605	0.0694	Thyroid
BCO2	11	112046208	112095421	0.099	-1.81434	0.06963	Thyroid
ADORA2B	17	15848231	15879210	0.24	-1.81042	0.070231	Thyroid
CEP76	18	12661955	12702703	0.04	1.8099	0.0703	Thyroid
PDE7A	8	66629906	66753755	0.013	-1.81023	0.0703	Thyroid
P2RY12	3	151055238	151102544	0.14	-1.8096	0.0704	Thyroid
SF3B3	16	70557691	70611570	0.043	-1.8079	0.0706	Thyroid
EBPL	13	50234811	50265623	0.26	1.8069	0.070782	Thyroid
COG4	16	70514473	70557457	0.11	-1.8045	0.0712	Thyroid
CDHR3	7	105517264	105676876	0.029	1.80395	0.07124	Thyroid
RBM23	14	23369855	23388396	0.051	1.80337	0.0713	Thyroid
ISYNA1	19	18545625	18548943	0.019	1.80376	0.0713	Thyroid
ZDHHC8	22	20119365	20135529	0.016	-1.80307	0.07138	Thyroid
CLCN6	1	11866207	11907674	0.046	-1.80303	0.0714	Thyroid
TMBIM4	12	66530718	66563807	0.34	-1.801	0.0717	Thyroid
GCH1	14	55308724	55369542	0.049	1.80032	0.0718	Thyroid
LOC283731	15	74418714	74421619	0.06	-1.80015	0.0718	Thyroid
SYS1-DBNDD2	20	43991701	44039245	0.038	1.7986	0.07208	Thyroid
MS4A7	11	60145958	60163424	0.017	1.79839	0.07212	Thyroid
MKRN1	7	140152840	140179369	0.095	1.79533	0.0726	Thyroid
KCTD5	16	2732495	2759029	0.2	1.793	0.073	Thyroid
CAPZA2	7	116451124	116559312	0.0077	-1.7888	0.07365	Thyroid
WDR11	10	122610695	122669035	0.055	1.7851	0.0742	Thyroid
PSMF1	20	1093906	1148424	0.1	1.78435	0.07437	Thyroid
CA12	15	63615731	63674075	0.24	1.78357	0.0745	Thyroid
DKFZp686O24166	11	17373317	17398869	0.019	1.78284	0.07461	Thyroid
TERF2	16	69389535	69419873	0.051	-1.7824	0.0747	Thyroid
MGST2	4	140586922	140661899	0.13	-1.78173	0.07479	Thyroid
C2orf15	2	99758185	99767926	0.029	-1.78066	0.075	Thyroid
GUSBL2	6	58246159	58287724	0.46	1.78012	0.075055	Thyroid
FFAR1	19	35842445	35843367	0.28	1.77977	0.0751	Thyroid
AMPD3	11	10471868	10529126	0.043	-1.77831	0.07535	Thyroid
EMP1	12	13349602	13369707	0.13	-1.77647	0.07566	Thyroid
TCP1	6	160199531	160210735	0.018	1.77581	0.075764	Thyroid
CRCP	7	65579805	65619551	0.15	-1.77541	0.07583	Thyroid
EYS	6	64429876	66417118	0.023	1.77473	0.075943	Thyroid
MARCH1	4	164449049	165305202	0.059	1.77286	0.07625	Thyroid
ZNF577	19	52359056	52394145	0.13	1.77212	0.0764	Thyroid
ALS2CR12	2	202153148	202222101	0.11	-1.77198	0.0764	Thyroid
NBR2	17	41277600	41305687	0.59	1.77127	0.076517	Thyroid
MS4A12	11	60260251	60274895	0.35	-1.7698	0.07676	Thyroid
MPI	15	75182410	75190565	0.18	-1.76983	0.0768	Thyroid
WBSCR26	7	73149399	73150330	0.28	1.7683	0.07701	Thyroid
C3orf26	3	99536681	99897446	0.039	1.7678	0.0771	Thyroid
COG7	16	23399816	23464503	0.081	1.7656	0.0775	Thyroid
LSM2	6	31765176	31774743	0.028	1.76445	0.077656	Thyroid
MTMR9L	1	32697262	32707311	0.036	1.764	0.0777	Thyroid
ZCCHC4	4	25314396	25372003	0.095	1.76366	0.07779	Thyroid
PCCA	13	100741337	101182686	0.022	-1.7637	0.077791	Thyroid
GPATCH4	1	156564282	156571270	0.056	-1.76131	0.0782	Thyroid
LOC644165	22	25028882	25049326	0.06	1.76098	0.07824	Thyroid
C14orf49	14	95883832	95942173	0.029	1.7591	0.0786	Thyroid
SPDYE2	7	102191679	102202755	0.051	1.75726	0.07887	Thyroid
GTF2A1L	2	48844948	48960284	0.3	1.75718	0.0789	Thyroid
BZRAP1	17	56378596	56406152	0.037	1.75664	0.078979	Thyroid
RAD9B	12	110939419	110969889	0.064	-1.75651	0.079	Thyroid
MUC6	11	1012824	1036706	0.034	1.75636	0.07903	Thyroid
MARVELD3	16	71660070	71675866	0.064	-1.7536	0.0795	Thyroid
LOC253724	12	104237528	104323989	0.15	1.75305	0.07959	Thyroid
INO80C	18	33033290	33077955	0.02	1.753	0.0796	Thyroid
CENPQ	6	49431096	49460820	0.079	1.753	0.079602	Thyroid
ALKBH1	14	78138749	78174356	0.06	-1.75195	0.0798	Thyroid
CALB2	16	71392626	71424339	0.088	1.7519	0.0798	Thyroid
ZNF717	3	75758794	75834670	0.085	-1.7514	0.0799	Thyroid
C11orf10	11	61556603	61560085	0.024	-1.75108	0.07993	Thyroid
GRRP1	1	26485511	26489118	0.047	-1.74998	0.0801	Thyroid
NOL8	9	95059641	95087876	0.017	1.74815	0.0804	Thyroid
STAM2	2	152973316	153032506	0.045	-1.74784	0.0805	Thyroid
MYOM1	18	3066806	3220106	0.076	-1.7471	0.0806	Thyroid
CBR4	4	169784921	169931422	0.13	1.7459	0.08083	Thyroid
NAALADL1	11	64812297	64826014	0.024	1.74447	0.08108	Thyroid
LOC645752	15	78206559	78219188	0.39	1.7436	0.0812	Thyroid
S100A11	1	152004983	152009511	0.023	1.74343	0.0813	Thyroid
ACAT2	6	160182989	160200085	0.03	1.74283	0.081363	Thyroid
CD3EAP	19	45909467	45914024	0.051	-1.74234	0.0814	Thyroid
ARMC7	17	73106082	73126360	0.029	1.7422	0.081473	Thyroid
PLD1	3	171318620	171528273	0.044	-1.742	0.0815	Thyroid
CRYBA4	22	27017928	27026635	0.053	1.74046	0.08178	Thyroid
CACHD1	1	64936476	65158741	0.064	1.74049	0.0818	Thyroid
CLUL1	18	596998	650291	0.14	-1.7394	0.082	Thyroid
C22orf28	22	32783562	32808274	0.03	1.73808	0.0822	Thyroid
MPRIP	17	16946107	17088873	0.043	1.73802	0.082208	Thyroid
TSGA10	2	99613725	99771187	0.077	-1.73748	0.0823	Thyroid
MAP2	2	210288771	210598834	0.02	-1.73746	0.0823	Thyroid
DDA1	19	17420337	17434104	0.092	-1.7364	0.0825	Thyroid
SCTR	2	120197421	120282028	0.057	-1.73578	0.0826	Thyroid
PRDM11	11	45115564	45246902	0.036	1.73497	0.08275	Thyroid
AOAH	7	36552610	36764153	0.12	1.73416	0.08289	Thyroid
IGHMBP2	11	68671319	68708069	0.22	1.73365	0.08298	Thyroid
CACNA2D4	12	1901124	2027870	0.053	1.73297	0.0831	Thyroid
PIGV	1	27114455	27124886	0.043	-1.73215	0.0832	Thyroid
ZDHHC18	1	27153201	27182207	0.42	1.73215	0.0832	Thyroid
FAM100B	17	74261286	74267379	0.17	-1.73096	0.083459	Thyroid
LOC100130557	1	41154752	41157933	0.035	1.73022	0.0836	Thyroid
KIAA0182	16	85645029	85709810	0.021	-1.7293	0.0838	Thyroid
C15orf26	15	81391749	81441515	0.19	1.72787	0.084	Thyroid
C3orf64	3	69024369	69062774	0.023	1.7273	0.0841	Thyroid
DPP8	15	65737999	65810035	0.042	-1.72385	0.0847	Thyroid
C5orf22	5	31532373	31555164	0.094	-1.72183	0.0851	Thyroid
ZRANB3	2	135957576	136288806	0.057	1.72088	0.0853	Thyroid
POLI	18	51795849	51824602	0.28	-1.7174	0.0859	Thyroid
KIAA0114	4	53578621	53580305	0.036	-1.71663	0.08605	Thyroid
SNIP1	1	38002145	38019903	0.1	-1.71553	0.0862	Thyroid
UPK3B	7	76139745	76157197	0.33	-1.71443	0.08645	Thyroid
SNX6	14	35030618	35099366	0.038	1.7143	0.0865	Thyroid
TRIM29	11	119981995	120008863	0.087	-1.71377	0.08657	Thyroid
BRCA2	13	32889617	32973809	0.064	1.7107	0.08714	Thyroid
ISLR2	15	74421715	74429141	0.047	-1.71002	0.0873	Thyroid
OPA3	19	46031027	46105466	0.21	-1.70945	0.0874	Thyroid
SHISA5	3	48509197	48542228	0.059	1.7091	0.0874	Thyroid
CMAH	6	25081297	25166793	0.11	1.70868	0.087511	Thyroid
AFAP1	4	7760440	7941653	0.15	-1.70848	0.08755	Thyroid
UBXN6	19	4445261	4457790	0.12	1.70838	0.0876	Thyroid
C15orf51	15	100330361	100347132	0.41	1.70778	0.0877	Thyroid
FAM107A	3	58549847	58613337	0.14	-1.7067	0.0879	Thyroid
GOLGA7	8	41348081	41368497	0.015	1.7062	0.088	Thyroid
POMZP3	7	76239304	76256620	0.55	1.70575	0.08806	Thyroid
LOC152217	3	196669494	196670884	0.029	-1.7054	0.0881	Thyroid
NME6	3	48335591	48342886	0.17	-1.7024	0.0887	Thyroid
FAM53A	4	1641609	1685854	0.036	1.69894	0.08933	Thyroid
LIN52	14	74551656	74667117	0.27	-1.69785	0.0895	Thyroid
NPTXR	22	39214458	39240017	0.028	1.69523	0.09003	Thyroid
KIN	10	7795276	7829944	0.098	1.69498	0.0901	Thyroid
USP8	15	50716579	50793276	0.073	-1.69266	0.0905	Thyroid
TFAM	10	60145176	60155896	0.041	1.69067	0.0909	Thyroid
HSPA4L	4	128703453	128754522	0.068	-1.69034	0.09096	Thyroid
SLFN5	17	33570086	33594754	0.12	-1.68951	0.091121	Thyroid
RNPS1	16	2303121	2318114	0.03	1.6888	0.0913	Thyroid
MCM3AP	21	47655048	47705236	0.12	-1.68798	0.0914	Thyroid
DHODH	16	72042643	72058954	0.15	1.6873	0.0915	Thyroid
PEX10	1	2336243	2344010	0.048	1.6859	0.0918	Thyroid
OSGEP	14	20915217	20923198	0.088	-1.68575	0.0918	Thyroid
PRSS45	3	46783582	46790130	0.087	-1.6861	0.0918	Thyroid
NOMO3	16	16326389	16388667	0.046	-1.6839	0.0922	Thyroid
RFT1	3	53122503	53164470	0.3	1.6833	0.0923	Thyroid
NUDT13	10	74870210	74891580	0.28	-1.68118	0.0927	Thyroid
MAPK13	6	36098262	36107841	0.065	-1.68093	0.092777	Thyroid
RNASEL	1	182542772	182558391	0.2	-1.67828	0.0933	Thyroid
ALDH8A1	6	135238529	135271244	0.29	1.6773	0.093483	Thyroid
ARMC9	2	232063342	232238606	0.31	-1.67725	0.0935	Thyroid
PKIB	6	122793062	123047517	0.096	-1.677	0.093543	Thyroid
CCT3	1	156278752	156308195	0.17	1.67654	0.0936	Thyroid
CARS2	13	111293757	111365950	0.26	-1.6764	0.09366	Thyroid
ITGA4	2	182321619	182402466	0.034	-1.67529	0.0939	Thyroid
PALM2-AKAP2	9	112542577	112934789	0.018	1.67392	0.0941	Thyroid
CAPRIN2	12	30862486	30907448	0.06	1.67398	0.09414	Thyroid
MOSC1	1	220960039	220987740	0.047	1.67282	0.0944	Thyroid
PRPF31	19	54618790	54635150	0.027	1.67207	0.0945	Thyroid
LOC654433	2	113993107	114024579	0.39	1.67146	0.0946	Thyroid
CYP2B7P1	19	41430170	41456563	0.11	-1.6704	0.0948	Thyroid
NKTR	3	42642147	42690232	0.04	1.6706	0.0948	Thyroid
TMEM18	2	667975	677439	0.28	-1.66932	0.0951	Thyroid
WFDC1	16	84328401	84363446	0.043	-1.6683	0.0952	Thyroid
FAM167B	1	32712818	32714459	0.023	-1.66821	0.0953	Thyroid
ASPDH	19	51014858	51017947	0.045	1.66722	0.0955	Thyroid
ATF6B	6	32065573	32096017	0.034	1.66688	0.095538	Thyroid
ZDHHC6	10	114190060	114207306	0.054	-1.66547	0.0958	Thyroid
MT1E	16	56659585	56661022	0.13	-1.6656	0.0958	Thyroid
SLC36A4	11	92880852	92931095	0.053	-1.66531	0.09585	Thyroid
FBXO5	6	153291660	153304740	0.06	1.66531	0.095852	Thyroid
AP4B1	1	114437677	114447741	0.039	1.66491	0.0959	Thyroid
KRI1	19	10663761	10676702	0.31	1.66404	0.0961	Thyroid
MAN1A1	6	119499267	119670926	0.022	1.66365	0.096182	Thyroid
CHRNB4	15	78916636	78952874	0.055	-1.66241	0.0964	Thyroid
PRMT2	21	48055527	48084862	0.086	1.66255	0.0964	Thyroid
ABHD11	7	73150427	73153190	0.028	1.66061	0.09679	Thyroid
SLC25A10	17	79670407	79688041	0.058	1.65851	0.097214	Thyroid
SPTY2D1	11	18627949	18656020	0.092	-1.65807	0.0973	Thyroid
TNFRSF21	6	47199269	47277680	0.031	1.65804	0.097309	Thyroid
SLC2A9	4	9827850	10041872	0.047	-1.65758	0.0974	Thyroid
RBBP5	1	205055979	205091131	0.055	-1.65703	0.0975	Thyroid
ZNF84	12	133613878	133639884	0.061	1.65679	0.09756	Thyroid
LRRN2	1	204586303	204654597	0.043	-1.65617	0.0977	Thyroid
C17orf101	17	80350100	80376462	0.087	1.65543	0.097837	Thyroid
RPIA	2	88991176	89050451	0.14	-1.65497	0.0979	Thyroid
VAMP3	1	7831329	7841491	0.21	1.65375	0.0982	Thyroid
WWP1	8	87354994	87480176	0.14	-1.65233	0.0985	Thyroid
TMEM170A	16	75477144	75498584	0.049	1.6518	0.0986	Thyroid
GLIS3	9	3824128	4300035	0.023	1.65188	0.0986	Thyroid
SPATA7	14	88852012	88904802	0.079	1.65133	0.0987	Thyroid
C1orf85	1	156259882	156265449	0.04	1.65071	0.0988	Thyroid
KLRG2	7	139138089	139168457	0.076	1.65056	0.09883	Thyroid
PSMG4	6	3259162	3268300	0.19	-1.64939	0.099068	Thyroid
EFCAB1	8	49623351	49647870	0.081	1.64794	0.0994	Thyroid
C1orf112	1	169631245	169822227	0.029	-1.6475	0.0995	Thyroid
TUBBP5	9	141044565	141071884	0.54	-1.64731	0.0995	Thyroid
SSPO	7	149473131	149531051	0.077	-1.64631	0.0997	Thyroid
ACSL5	10	114133916	114188137	0.055	1.64602	0.0998	Thyroid
C2orf86	2	63348537	63815851	0.062	1.64287	0.1	Thyroid
PP14571	2	241388732	241396117	0.11	-1.64304	0.1	Thyroid
NT5C3	7	33053744	33102409	0.21	-1.64168	0.10066	Thyroid
TCP11	6	35085849	35109187	0.025	1.64124	0.100748	Thyroid
MCM3APAS	21	47649158	47671743	0.05	-1.64091	0.1008	Thyroid
MAST2	1	46269285	46501797	0.024	-1.63951	0.101	Thyroid
EPRS	1	220141942	220220000	0.022	-1.64197	0.101	Thyroid
SIRT1	10	69644427	69678146	0.048	1.64238	0.101	Thyroid
LOC401431	7	149564785	149570951	0.074	-1.63908	0.1012	Thyroid
KIAA0776	6	96969702	97003149	0.066	1.63873	0.101269	Thyroid
PRDX5	11	64085569	64089282	0.035	-1.6386	0.1013	Thyroid
CCDC18	1	93645920	93744266	0.014	-1.63682	0.102	Thyroid
CASC2	10	119806332	119969659	0.099	1.63416	0.102	Thyroid
ARID4A	14	58765222	58840448	0.025	1.63513	0.102	Thyroid
SERP1	3	150259781	150321015	0.062	-1.6354	0.102	Thyroid
STK3	8	99466862	99954873	0.014	1.63675	0.102	Thyroid
TRIM24	7	138145079	138270330	0.036	1.63362	0.10234	Thyroid
ITCH	20	32951062	33099197	0.064	1.63185	0.10271	Thyroid
CHAF1A	19	4402660	4443393	0.2	1.62848	0.103	Thyroid
C5orf44	5	64920558	64961953	0.058	1.6297	0.103	Thyroid
FHL5	6	97010435	97064512	0.0082	-1.63048	0.103	Thyroid
POP5	12	121016849	121019201	0.1	1.63006	0.10309	Thyroid
ACCS	11	44087475	44105569	0.46	-1.62956	0.10319	Thyroid
GPR179	17	36481494	36499693	0.019	1.62895	0.103324	Thyroid
NOM1	7	156742417	156765875	0.1	-1.62716	0.1037	Thyroid
PIGN	18	59711460	59854289	0.15	-1.6249	0.104	Thyroid
SENP3	17	7465319	7475285	0.039	-1.62549	0.104059	Thyroid
FXR2	17	7494548	7518071	0.032	-1.62549	0.104059	Thyroid
FDX1	11	110300594	110335604	0.2	1.62437	0.1043	Thyroid
TRIM38	6	25963071	25985350	0.16	1.62327	0.104531	Thyroid
POLR2F	22	38349674	38384341	0.016	-1.6221	0.10478	Thyroid
DAD1	14	23033807	23058143	0.071	-1.62133	0.105	Thyroid
ZNF781	19	38158650	38183216	0.096	-1.62299	0.105	Thyroid
CCDC61	19	46498339	46521873	0.075	1.61927	0.105	Thyroid
PRDM6	5	122424841	122523744	0.053	1.62065	0.105	Thyroid
FNTA	8	42911442	42940923	0.036	1.61948	0.105	Thyroid
TMEM184B	22	38615298	38669016	0.042	-1.61907	0.10543	Thyroid
ARFIP1	4	153701112	153833061	0.087	1.61729	0.10582	Thyroid
MAST1	19	12944765	12985765	0.035	1.6162	0.106	Thyroid
NUDT16P1	3	131080689	131083965	0.012	1.6174	0.106	Thyroid
ZNF483	9	114287447	114340124	0.04	1.6187	0.106	Thyroid
C1QBP	17	5336099	5342471	0.043	1.61384	0.106562	Thyroid
CD22	19	35820079	35838262	0.44	1.61181	0.107	Thyroid
CYP7A1	8	59402738	59412720	0.021	1.61154	0.107	Thyroid
TMEM67	8	94767072	94830346	0.02	-1.60987	0.107	Thyroid
RTN4IP1	6	107018905	107078366	0.057	-1.61029	0.107335	Thyroid
CRMP1	4	5749811	5894785	0.21	-1.60999	0.1074	Thyroid
FLJ45340	7	128281295	128301052	0.19	-1.60911	0.10759	Thyroid
SRD5A3	4	56212409	56237866	0.18	-1.60829	0.10777	Thyroid
CTTN	11	70244612	70282689	0.058	1.60748	0.10795	Thyroid
MDM4	1	204485511	204677661	0.055	-1.60863	0.108	Thyroid
LTB4R	14	24780705	24787061	0.054	-1.60627	0.108	Thyroid
PHLPP2	16	71671739	71757715	0.14	-1.6057	0.108	Thyroid
FADS2	11	61583728	61634825	0.33	-1.60689	0.10808	Thyroid
EFHC1	6	52284994	52387892	0.039	-1.60493	0.10851	Thyroid
ZNF204P	6	27325602	27343153	0.088	1.60482	0.108533	Thyroid
WIBG	12	56295197	56321697	0.053	1.60448	0.10861	Thyroid
C2orf54	2	241825466	241835573	0.28	1.60233	0.109	Thyroid
ABCB8	7	150725510	150744867	0.067	-1.60205	0.10914	Thyroid
LOC348926	4	3943670	3957148	0.089	1.60197	0.10916	Thyroid
N6AMT1	21	30244513	30257693	0.18	1.60046	0.1095	Thyroid
TMEM188	16	50059189	50070998	0.029	1.5974	0.11	Thyroid
TMEM141	9	139685777	139687768	0.035	-1.59618	0.11	Thyroid
CHIA	1	111833484	111863184	0.13	1.59584	0.111	Thyroid
KHK	2	27309611	27323619	0.19	1.59395	0.111	Thyroid
VPS28	8	145649000	145653927	0.047	1.59354	0.111	Thyroid
XPA	9	100437192	100459691	0.021	1.59312	0.111	Thyroid
RALGPS1	9	129677053	129985443	0.096	1.59588	0.111	Thyroid
CYB5R3	22	43014814	43045405	0.031	-1.59042	0.11174	Thyroid
UTP14C	13	52586550	52607734	0.026	-1.5904	0.111748	Thyroid
NDE1	16	15737124	15820206	0.27	1.5899	0.112	Thyroid
PLA2G4C	19	48551101	48614109	0.14	-1.58785	0.112	Thyroid
LOC728613	5	1597674	1634120	0.43	-1.58771	0.112	Thyroid
C6orf145	6	3722836	3752246	0.079	1.58698	0.112518	Thyroid
PRSS30P	16	2889575	2892711	0.074	-1.5839	0.113	Thyroid
IL4I1	19	50390639	50432786	0.029	-1.58533	0.113	Thyroid
BTNL8	5	180326077	180377904	0.035	1.58279	0.113	Thyroid
RPL12	9	130209955	130213684	0.2	1.58427	0.113	Thyroid
ABO	9	136130563	136150630	0.6	-1.58663	0.113	Thyroid
PDS5B	13	33160592	33352155	0.015	-1.5832	0.113376	Thyroid
C7orf53	7	112120908	112130935	0.071	1.58091	0.1139	Thyroid
C1orf156	1	169761675	169764031	0.24	1.5783	0.114	Thyroid
SIGLEC5	19	52114782	52133727	0.091	-1.58114	0.114	Thyroid
EIF5B	2	99953834	100016726	0.054	-1.58017	0.114	Thyroid
B3GAT2	6	71568019	71666788	0.067	-1.57676	0.114851	Thyroid
MMEL1	1	2522081	2564481	0.072	1.5769	0.115	Thyroid
RNPEP	1	201951766	201975274	0.13	1.57583	0.115	Thyroid
MITD1	2	99785726	99797492	0.021	1.574	0.115	Thyroid
DNAH5	5	13690437	13944589	0.084	-1.57631	0.115	Thyroid
C4orf21	4	113460490	113558151	0.019	-1.57507	0.11524	Thyroid
CD300A	17	72462522	72480931	0.048	-1.57242	0.115854	Thyroid
CCDC78	16	772583	776880	0.034	-1.5704	0.116	Thyroid
PPAPDC3	9	134165081	134184649	0.088	1.57063	0.116	Thyroid
ZC3HC1	7	129658127	129691233	0.017	1.57115	0.11615	Thyroid
SCUBE3	6	35182190	35218609	0.028	-1.57005	0.116403	Thyroid
USP48	1	22004794	22109688	0.13	1.56601	0.117	Thyroid
SLC44A2	19	10713121	10755234	0.25	1.56841	0.117	Thyroid
GPATCH1	19	33571786	33621318	0.32	-1.56817	0.117	Thyroid
ZIK1	19	58095628	58103757	0.051	-1.56925	0.117	Thyroid
PNO1	2	68385005	68403089	0.039	1.56684	0.117	Thyroid
FAM55C	3	101498029	101547073	0.038	1.569	0.117	Thyroid
CXCL16	17	4636830	4643223	0.0025	1.56615	0.117313	Thyroid
MRPL21	11	68658747	68671303	0.5	-1.56461	0.11767	Thyroid
ADRBK2	22	25960861	26125256	0.03	-1.56442	0.11772	Thyroid
TUBA8	22	18560686	18629275	0.041	-1.56436	0.11773	Thyroid
HLA-DRB5	6	32485163	32557562	0.038	1.56433	0.117739	Thyroid
ZNF669	1	247263264	247267674	0.093	1.56157	0.118	Thyroid
SLK	10	105727470	105787342	0.015	1.56216	0.118	Thyroid
CCDC11	18	47753563	47792865	0.061	-1.563	0.118	Thyroid
EXOSC5	19	41892278	41903256	0.031	-1.56488	0.118	Thyroid
MRPL55	1	228294381	228297013	0.039	1.55817	0.119	Thyroid
ZNF23	16	71481513	71523217	0.16	-1.5609	0.119	Thyroid
VN1R1	19	57966542	57967854	0.16	-1.558	0.119	Thyroid
IFT172	2	27667241	27712571	0.018	1.5601	0.119	Thyroid
CBS	21	44473301	44496472	0.036	-1.5591	0.119	Thyroid
SLC41A3	3	125725201	125820400	0.19	1.5575	0.119	Thyroid
CCDC21	1	26560693	26605299	0.026	1.55302	0.12	Thyroid
LOC284440	19	19867183	19887222	0.13	-1.55451	0.12	Thyroid
SGOL2	2	201390865	201448818	0.03	1.55514	0.12	Thyroid
NSA2	5	74063103	74072734	0.52	-1.55601	0.12	Thyroid
DDX6	11	118618473	118661972	0.027	1.55418	0.12014	Thyroid
C22orf25	22	20004537	20053447	0.12	-1.55244	0.12056	Thyroid
COL8A2	1	36560846	36565850	0.034	-1.54921	0.121	Thyroid
SH3GLB1	1	87170257	87213866	0.048	1.54921	0.121	Thyroid
LOC100134368	16	432241	442960	0.067	-1.5491	0.121	Thyroid
GALNT10	5	153570295	153799809	0.092	1.55023	0.121	Thyroid
SERAC1	6	158530536	158589312	0.027	-1.55006	0.121128	Thyroid
RBP7	1	10057255	10076077	0.077	1.54745	0.122	Thyroid
FAM149B1	10	74927877	75001938	0.11	1.54792	0.122	Thyroid
ATIC	2	216176692	216214477	0.22	1.54449	0.122	Thyroid
EFCAB5	17	28256874	28435469	0.2	1.54378	0.122642	Thyroid
C10orf75	10	102133333	102148114	0.039	1.54123	0.123	Thyroid
FECH	18	55212074	55253969	0.11	1.5423	0.123	Thyroid
KRTDAP	19	35978230	35981356	0.048	-1.54087	0.123	Thyroid
NIT2	3	100053562	100074477	0.1	1.5427	0.123	Thyroid
KIF16B	20	16252749	16554078	0.43	1.54145	0.12321	Thyroid
RPS26	12	56435686	56438005	0.51	-1.53891	0.12383	Thyroid
CCDC124	19	18043824	18054793	0.047	-1.53843	0.124	Thyroid
SGCA	17	48243366	48253292	0.23	-1.5381	0.124023	Thyroid
LIG3	17	33307538	33332088	0.22	-1.53534	0.124701	Thyroid
ZNF718	4	53272	156488	0.59	1.53429	0.12496	Thyroid
WAC	10	28821427	28909921	0.045	-1.53218	0.125	Thyroid
TSPAN15	10	71211226	71267423	0.042	-1.53503	0.125	Thyroid
ENTPD1	10	97471536	97637022	0.041	-1.5347	0.125	Thyroid
PRMT7	16	68344945	68391162	0.19	1.5346	0.125	Thyroid
ST8SIA5	18	44259081	44337039	0.016	1.5335	0.125	Thyroid
PLA2R1	2	160798012	160919121	0.014	1.53538	0.125	Thyroid
TMEM42	3	44903408	44907152	0.02	1.5339	0.125	Thyroid
LOC25845	5	470626	473080	0.04	1.5332	0.125	Thyroid
C9orf130	9	98568372	98638259	0.68	1.53458	0.125	Thyroid
SNX19	11	130745767	130786382	0.32	1.53194	0.12554	Thyroid
GRIN2C	17	72838168	72856966	0.019	1.5307	0.125845	Thyroid
AGRN	1	955503	991492	0.025	1.53002	0.126	Thyroid
TRIT1	1	40306708	40349177	0.44	-1.52991	0.126	Thyroid
FAM128A	2	132241534	132250064	0.28	1.53207	0.126	Thyroid
CETN3	5	89689531	89705603	0.014	-1.53128	0.126	Thyroid
ELOVL4	6	80624536	80657315	0.079	-1.52971	0.126089	Thyroid
SHPK	17	3511556	3539616	0.31	1.52917	0.126223	Thyroid
CSTF3	11	33106135	33183037	0.035	-1.52647	0.12689	Thyroid
SOSTDC1	7	16501108	16570205	0.024	1.5262	0.12696	Thyroid
KPNA6	1	32573644	32642166	0.031	1.52506	0.127	Thyroid
XCL2	1	168510005	168513235	0.061	-1.52662	0.127	Thyroid
B3GALNT2	1	235610533	235667781	0.15	1.52523	0.127	Thyroid
ZNF33B	10	43069633	43133992	0.021	1.52455	0.127	Thyroid
TRUB1	10	116697915	116737438	0.038	1.52745	0.127	Thyroid
DIDO1	20	61509090	61569274	0.038	-1.52496	0.12727	Thyroid
EIF2AK1	7	6061880	6098860	0.13	-1.5243	0.12743	Thyroid
LRPPRC	2	44113363	44223144	0.15	1.52062	0.128	Thyroid
UCKL1AS	20	62584737	62588338	0.031	-1.52204	0.128	Thyroid
TRAPPC1	17	7833667	7835258	0.046	1.522	0.128008	Thyroid
EPHA1	7	143088207	143105985	0.061	1.52169	0.12809	Thyroid
NMU	4	56461405	56502465	0.031	-1.51889	0.12879	Thyroid
PTHLH	12	28111018	28124916	0.039	-1.51839	0.12892	Thyroid
ZNF134	19	58125830	58133636	0.086	1.51659	0.129	Thyroid
PTGS1	9	125132809	125157981	0.059	-1.51911	0.129	Thyroid
STX2	12	131274149	131323811	0.24	-1.51775	0.12908	Thyroid
NADSYN1	11	71164217	71212579	0.074	1.51553	0.12964	Thyroid
ADARB2	10	1228074	1779718	0.13	-1.51215	0.13	Thyroid
SNUPN	15	75890426	75918719	0.21	-1.51403	0.13	Thyroid
MAG	19	35783038	35820133	0.51	1.51606	0.13	Thyroid
ZNF589	3	48282596	48329113	0.24	1.513	0.13	Thyroid
TRIB3	20	361308	378201	0.053	-1.51374	0.13009	Thyroid
C20orf203	20	31220662	31261743	0.062	-1.51245	0.13042	Thyroid
COPE	19	19010324	19030199	0.062	-1.50856	0.131	Thyroid
PIGK	1	77554669	77685132	0.032	-1.50556	0.132	Thyroid
LRRC20	10	72058729	72142382	0.029	-1.50544	0.132	Thyroid
DUOXA1	15	45409688	45422075	0.053	1.50511	0.132	Thyroid
DYX1C1	15	55669147	55800432	0.094	-1.50436	0.132	Thyroid
NIP7	16	69373546	69377007	0.18	-1.507	0.132	Thyroid
PNPLA6	19	7599043	7626652	0.058	-1.50598	0.132	Thyroid
FAHD2A	2	96068448	96078878	0.03	1.50777	0.132	Thyroid
LOC100130691	2	178148242	178257419	0.026	1.50512	0.132	Thyroid
EIF4E2	2	233415357	233448349	0.02	-1.50815	0.132	Thyroid
PELP1	17	4574680	4607632	0.046	1.50553	0.132188	Thyroid
NIPSNAP1	22	29950800	29977144	0.18	1.50389	0.13261	Thyroid
USP53	4	120133782	120216672	0.065	-1.50285	0.13288	Thyroid
EIF2B3	1	45316450	45452282	0.13	1.5035	0.133	Thyroid
LYST	1	235824345	236046940	0.23	1.50219	0.133	Thyroid
NWD1	19	16830787	16928773	0.064	1.50309	0.133	Thyroid
MYBPC2	19	50936160	50969583	0.074	-1.5027	0.133	Thyroid
ADAP1	7	937538	1015235	0.009	1.49877	0.13393	Thyroid
RFX5	1	151313116	151319769	0.03	1.4987	0.134	Thyroid
CD247	1	167399878	167487847	0.025	1.49737	0.134	Thyroid
PARD3	10	34400098	35103923	0.054	1.49714	0.134	Thyroid
MTHFD1	14	64854759	64926727	0.27	-1.4968	0.134	Thyroid
PAPD5	16	50186829	50269217	0.029	-1.4997	0.134	Thyroid
PDF	16	69362524	69364498	0.039	-1.4981	0.134	Thyroid
HADHA	2	26413505	26467594	0.036	-1.49859	0.134	Thyroid
FAM160A2	11	6232565	6255941	0.021	-1.49741	0.13429	Thyroid
GALC	14	88304164	88459907	0.07	-1.49649	0.135	Thyroid
MATN3	2	20191814	20212455	0.018	-1.49348	0.135	Thyroid
C9orf5	9	111777416	111882225	0.074	-1.49583	0.135	Thyroid
DPM2	9	130697374	130700763	0.12	-1.49611	0.135	Thyroid
FLJ39582	22	21356211	21364662	0.56	-1.49291	0.13546	Thyroid
LIN7C	11	27515971	27528326	0.098	1.49195	0.13571	Thyroid
CLYBL	13	100258936	100544823	0.041	-1.4916	0.135799	Thyroid
DGCR10	22	19010137	19011062	0.073	1.49138	0.13586	Thyroid
FGGY	1	59762625	60228400	0.048	-1.49014	0.136	Thyroid
ZNF257	19	22235266	22273901	0.23	1.49009	0.136	Thyroid
GPR113	2	26531041	26569685	0.1	-1.48967	0.136	Thyroid
C2orf58	2	38358247	38408991	0.016	1.49247	0.136	Thyroid
TSNARE1	8	143293442	143484543	0.024	1.49143	0.136	Thyroid
C21orf129	21	43131680	43135935	0.38	1.4903	0.1361	Thyroid
PYGB	20	25228706	25278647	0.079	1.48875	0.13655	Thyroid
TCEA3	1	23707555	23751261	0.061	-1.48594	0.137	Thyroid
GRIK3	1	37261128	37499844	0.038	-1.48586	0.137	Thyroid
KRAS	12	25358180	25403863	0.024	1.48705	0.137	Thyroid
ZNF565	19	36673188	36705986	0.065	1.48728	0.137	Thyroid
THSD7A	7	11414173	11871824	0.089	1.48678	0.13707	Thyroid
POLR1D	13	28194895	28241547	0.24	-1.4867	0.1371	Thyroid
C1orf84	1	43855556	43878462	0.029	-1.4819	0.138	Thyroid
LOC441666	10	42827315	42863493	0.24	1.48169	0.138	Thyroid
C19orf52	19	11039424	11040917	0.062	-1.48329	0.138	Thyroid
GGCX	2	85776193	85788657	0.029	-1.48502	0.138	Thyroid
ZNF34	8	145998503	146012725	0.12	1.4843	0.138	Thyroid
USH1C	11	17515443	17565963	0.34	1.48296	0.13808	Thyroid
NXT1	20	23331373	23335408	0.13	-1.48157	0.13845	Thyroid
C7orf52	7	100813778	100823557	0.12	1.48146	0.13848	Thyroid
TIPRL	1	168148171	168171349	0.074	1.47832	0.139	Thyroid
C2orf28	2	27434899	27440044	0.076	-1.48038	0.139	Thyroid
RBM43	2	152104729	152118389	0.03	1.48099	0.139	Thyroid
CCDC127	5	204875	218297	0.042	1.48041	0.139	Thyroid
SLC2A8	9	130159465	130170161	0.021	-1.48013	0.139	Thyroid
TMEM5	12	64173637	64202887	0.081	1.47854	0.13926	Thyroid
DKFZp761E198	11	65543380	65547822	0.053	-1.47786	0.13944	Thyroid
FLJ35220	17	78388967	78411881	0.075	1.47711	0.139646	Thyroid
CDKN2D	19	10677139	10679655	0.021	1.47741	0.14	Thyroid
GHRLOS	3	10322637	10335132	0.32	1.4757	0.14	Thyroid
TBC1D23	3	99979686	100044078	0.037	1.4742	0.14	Thyroid
FBXO25	8	356808	419873	0.067	1.47425	0.14	Thyroid
PAN3	13	28712643	28869469	0.029	-1.4742	0.140423	Thyroid
SH2D3A	19	6752175	6767523	0.15	-1.47105	0.141	Thyroid
ZNF266	19	9523272	9546234	0.52	1.47184	0.141	Thyroid
AHSA2	2	61404553	61414058	0.34	1.47268	0.141	Thyroid
SLC22A5	5	131705401	131731302	0.019	1.47319	0.141	Thyroid
RFK	9	79000433	79009444	0.11	-1.47364	0.141	Thyroid
FDXR	17	72858620	72869156	0.064	1.47116	0.141247	Thyroid
MX1	21	42792520	42831140	0.062	1.4697	0.1416	Thyroid
ACAT1	11	107992258	108018889	0.22	1.46922	0.14177	Thyroid
KCNA2	1	111136203	111174096	0.012	-1.46667	0.142	Thyroid
LGTN	1	206764974	206785904	0.1	1.468	0.142	Thyroid
BIVM	13	103451399	103493887	0.073	1.4681	0.14208	Thyroid
GOSR1	17	28804426	28853831	0.079	1.46694	0.142392	Thyroid
TMEM209	7	129804555	129845338	0.054	-1.46561	0.14275	Thyroid
AGT	1	230838274	230850336	0.11	-1.46578	0.143	Thyroid
ITPK1	14	93403259	93582263	0.033	-1.46552	0.143	Thyroid
SHISA9	16	12995477	13334272	0.014	1.4663	0.143	Thyroid
TRIB2	2	12856998	12882856	0.012	-1.46415	0.143	Thyroid
LY6K	8	143781529	143785582	0.11	-1.46479	0.143	Thyroid
CCDC158	4	77234193	77328458	0.037	1.46458	0.14304	Thyroid
RALY	20	32581732	32672675	0.048	1.46229	0.14366	Thyroid
ADAMDEC1	8	24241798	24263526	0.08	-1.46251	0.144	Thyroid
ASPHD2	22	26825280	26840978	0.073	-1.45997	0.1443	Thyroid
FAM65B	6	24804513	25042398	0.028	1.4597	0.144373	Thyroid
SLC22A15	1	116519119	116612672	0.075	-1.45753	0.145	Thyroid
TDRKH	1	151742583	151763010	0.033	-1.45657	0.145	Thyroid
MRPL19	2	75873909	75897879	0.11	-1.4584	0.145	Thyroid
ASPA	17	3377404	3402699	0.053	-1.45553	0.145523	Thyroid
C14orf148	14	77860424	77889379	0.013	1.4544	0.146	Thyroid
AHSA1	14	77924373	77935807	0.031	1.4544	0.146	Thyroid
KCNK13	14	90528108	90652195	0.11	-1.45278	0.146	Thyroid
HDHD2	18	44633782	44676871	0.069	1.4542	0.146	Thyroid
ZNF780A	19	40575060	40596845	0.042	-1.45458	0.146	Thyroid
TSKS	19	50243012	50266515	0.077	-1.45335	0.146	Thyroid
SLC20A1	2	113403527	113421398	0.03	1.45271	0.146	Thyroid
CLASP1	2	122095354	122407052	0.026	1.45167	0.147	Thyroid
GAS2	11	22688160	22834546	0.038	1.44737	0.14779	Thyroid
DCHS1	11	6642558	6677074	0.073	1.44707	0.14788	Thyroid
GSC	14	95234561	95236499	0.067	-1.4484	0.148	Thyroid
DYNC2LI1	2	44001182	44037147	0.18	-1.44515	0.148	Thyroid
SKA2	17	57187308	57232800	0.019	-1.44533	0.148365	Thyroid
C4orf36	4	87797359	87813575	0.02	1.44493	0.14848	Thyroid
FAM82A2	15	41028086	41048049	0.043	1.44197	0.149	Thyroid
FLYWCH1	16	2961980	3001208	0.39	-1.4428	0.149	Thyroid
GRIN2A	16	9847267	10276611	0.22	1.4428	0.149	Thyroid
ZNF737	19	20720799	20748626	0.093	-1.44248	0.149	Thyroid
ALKBH5	17	18086867	18113265	0.061	-1.44059	0.1497	Thyroid
PROK1	1	110993788	110999974	0.021	-1.44054	0.15	Thyroid
TTC13	1	231041990	231114607	0.099	-1.44022	0.15	Thyroid
WFIKKN1	16	679239	684116	0.36	1.4405	0.15	Thyroid
HEMK1	3	50606583	50622419	0.076	-1.4406	0.15	Thyroid
SLC12A2	5	127419483	127525379	0.079	-1.44003	0.15	Thyroid
FBXO39	17	6679552	6700420	0.21	1.43789	0.150464	Thyroid
TAF1A	1	222731244	222763255	0.14	-1.4361	0.151	Thyroid
PPA1	10	71962586	71993190	0.22	1.43602	0.151	Thyroid
SGPP1	14	64150937	64194756	0.016	-1.43646	0.151	Thyroid
ZNF544	19	58740070	58775006	0.11	-1.43701	0.151	Thyroid
TTC31	2	74710200	74721691	0.045	1.43609	0.151	Thyroid
NAA40	11	63706442	63724444	0.032	-1.43487	0.15132	Thyroid
USP44	12	95910889	95945263	0.043	1.43343	0.15173	Thyroid
C6orf168	6	99720794	99797531	0.018	-1.43303	0.15185	Thyroid
DDX27	20	47835832	47860612	0.048	-1.43258	0.15198	Thyroid
UROD	1	45477830	45481341	0.08	-1.43186	0.152	Thyroid
VCL	10	75754951	75879912	0.052	-1.43403	0.152	Thyroid
RPS24	10	79793518	79816570	0.056	-1.43323	0.152	Thyroid
ALMS1P	2	73872046	73912692	0.24	1.43386	0.152	Thyroid
C3orf70	3	184795840	184870802	0.083	-1.4342	0.152	Thyroid
SPINK13	5	147648282	147665772	0.018	1.43099	0.152	Thyroid
CERCAM	9	131174045	131199627	0.034	1.43363	0.152	Thyroid
C4orf33	4	130014829	130033842	0.13	-1.43019	0.15266	Thyroid
PRG2	11	57151267	57191532	0.074	-1.42952	0.15285	Thyroid
PSTPIP1	15	77287021	77329671	0.031	1.42837	0.153	Thyroid
PCM1	8	17780366	17887455	0.047	1.43049	0.153	Thyroid
NAGLU	17	40687951	40696464	0.093	1.42848	0.153154	Thyroid
HIST1H3E	6	26224427	26226589	0.11	1.42669	0.153669	Thyroid
RPLP0	12	120634510	120639014	0.026	-1.42655	0.15371	Thyroid
CPT2	1	53662101	53679867	0.038	-1.42669	0.154	Thyroid
NME7	1	169101771	169337186	0.24	-1.42511	0.154	Thyroid
GPIHBP1	8	144295068	144299043	0.11	-1.42464	0.154	Thyroid
NFKBIL2	8	145654165	145669812	0.096	1.42688	0.154	Thyroid
MATN4	20	43922087	43937169	0.039	1.42481	0.15421	Thyroid
ESYT2	7	158523689	158622319	0.052	-1.42441	0.15433	Thyroid
XYLT2	17	48423393	48438511	0.026	-1.42297	0.154745	Thyroid
ARL4D	17	41476353	41478503	0.021	-1.42263	0.154842	Thyroid
KIAA0495	1	3652550	3663886	0.12	1.4206	0.155	Thyroid
LIG1	19	48618703	48673560	0.025	1.42258	0.155	Thyroid
TRIM59	3	160153292	160167626	0.02	1.4221	0.155	Thyroid
CLK4	5	178029665	178057616	0.018	1.4205	0.155	Thyroid
STAT6	12	57489195	57522883	0.012	-1.42047	0.15547	Thyroid
TPD52L1	6	125474879	125584644	0.027	1.42011	0.155577	Thyroid
TMPRSS4	11	117947727	117996041	0.012	1.41891	0.15592	Thyroid
HYI	1	43916831	43919918	0.23	-1.41872	0.156	Thyroid
SACM1L	3	45730754	45786900	0.16	-1.4179	0.156	Thyroid
MAP3K1	5	56110900	56191976	0.032	1.41853	0.156	Thyroid
SQSTM1	5	179233388	179265075	0.084	1.41696	0.156	Thyroid
RAC1	7	6414126	6443597	0.063	1.41829	0.15611	Thyroid
DHRS7	14	60611502	60636561	0.27	1.41493	0.157	Thyroid
ARPP19	15	52839432	52861364	0.18	1.41451	0.157	Thyroid
NUP35	2	183984750	184026407	0.014	1.41542	0.157	Thyroid
ZSCAN21	7	99647417	99662661	0.088	1.41508	0.15704	Thyroid
CCT6P1	7	65216092	65228661	0.05	1.41357	0.15749	Thyroid
HSPC157	1	22351707	22357713	0.66	1.41096	0.158	Thyroid
PRTG	15	55903748	56035177	0.18	-1.41248	0.158	Thyroid
CCDC64B	16	3077869	3085542	0.083	-1.4114	0.158	Thyroid
OLFM2	19	9964395	10047070	0.037	-1.4109	0.158	Thyroid
CSMD1	8	2792876	4852328	0.25	1.41119	0.158	Thyroid
C21orf7	21	30449812	30548200	0.029	-1.41104	0.1582	Thyroid
HSPB11	1	54387234	54411288	0.089	-1.40939	0.159	Thyroid
CASKIN1	16	2227184	2246465	0.037	1.4072	0.159	Thyroid
ATG4B	2	242577027	242613264	0.013	1.4079	0.159	Thyroid
RAB2A	8	61429559	61533629	0.053	1.40935	0.159	Thyroid
RNH1	11	494512	507273	0.028	1.40547	0.15988	Thyroid
CTAGE5	14	39734476	39820395	0.039	1.40675	0.16	Thyroid
GLI2	2	121493199	121750228	0.043	-1.40431	0.16	Thyroid
CDC25A	3	48198668	48229801	0.19	1.4056	0.16	Thyroid
OPA1	3	193310933	193415599	0.049	-1.4067	0.16	Thyroid
TBC1D2	9	100961281	101018003	0.2	1.40655	0.16	Thyroid
PLEKHA7	11	16800548	17035963	0.045	-1.4049	0.16005	Thyroid
IMPG1	6	76631062	76782335	0.0081	1.40475	0.160096	Thyroid
PRSS37	7	141536086	141541285	0.055	-1.40221	0.16085	Thyroid
TRIP4	15	64680020	64747500	0.16	1.40238	0.161	Thyroid
MLST8	16	2255450	2259417	0.086	-1.4017	0.161	Thyroid
ZNF506	19	19896651	19932560	0.11	-1.40233	0.161	Thyroid
CADM2	3	85008133	86117948	0.021	1.4003	0.161	Thyroid
LOC389332	5	135527157	135528851	0.027	-1.40021	0.161	Thyroid
EPHX2	8	27348645	27402484	0.073	-1.40099	0.161	Thyroid
WDR31	9	116077932	116102567	0.025	-1.4009	0.161	Thyroid
ORAOV1	11	69471368	69490165	0.026	-1.40002	0.16151	Thyroid
KRTAP5-10	11	71276609	71277666	0.033	-1.39922	0.16175	Thyroid
PELO	5	52083774	52121044	0.031	-1.39781	0.162	Thyroid
BHMT	5	78407604	78428112	0.039	-1.39771	0.162	Thyroid
UNC13B	9	35161989	35405331	0.038	-1.39839	0.162	Thyroid
ABCC8	11	17414433	17498449	0.17	1.39793	0.16213	Thyroid
CHPF2	7	150929575	150935905	0.032	-1.39754	0.16225	Thyroid
EMID2	7	101006122	101202304	0.082	-1.39717	0.16236	Thyroid
PGS1	17	76374735	76420637	0.052	-1.39691	0.162439	Thyroid
MED28	4	17616273	17629791	0.026	-1.39583	0.16277	Thyroid
COX7A2L	2	42577647	42596150	0.3	1.39455	0.163	Thyroid
TMEM136	11	120196016	120204388	0.031	1.39202	0.16392	Thyroid
DNM1P35	15	76020011	76032502	0.059	1.39101	0.164	Thyroid
FAM171B	2	187558789	187630684	0.046	1.39232	0.164	Thyroid
STK4	20	43595120	43708591	0.027	1.39171	0.16401	Thyroid
VSIG2	11	124617371	124622109	0.017	-1.39089	0.16426	Thyroid
DIABLO	12	122692210	122712068	0.034	-1.39041	0.1644	Thyroid
FRAS1	4	78978724	79465423	0.051	1.3891	0.1648	Thyroid
COL9A1	6	70925744	71012786	0.069	-1.38867	0.164934	Thyroid
IFI27L2	14	94594119	94595957	0.063	-1.38599	0.166	Thyroid
ZNF550	19	58053208	58071228	0.067	-1.38517	0.166	Thyroid
CCDC107	9	35658311	35661183	0.041	1.384	0.166	Thyroid
PMS2CL	7	6749757	6793492	0.12	1.38407	0.16634	Thyroid
SNORD1C	17	74553860	74559835	0.031	-1.38288	0.166701	Thyroid
SORCS2	4	7194374	7744563	0.1	1.3828	0.16672	Thyroid
CBLN3	14	24895742	24898731	0.5	-1.38103	0.167	Thyroid
ZNF236	18	74536116	74682680	0.029	-1.3828	0.167	Thyroid
CC2D2A	4	15471489	15603180	0.0048	1.38053	0.16742	Thyroid
SLC22A11	11	64323098	64338998	0.028	-1.38015	0.16754	Thyroid
EVPL	17	74002927	74023507	0.14	1.37986	0.167629	Thyroid
N4BP2L2	13	33006930	33112936	0.16	1.3789	0.167913	Thyroid
HSD17B7	1	162760496	162782607	0.08	1.37934	0.168	Thyroid
PTPRVP	1	202137179	202158577	0.068	1.37853	0.168	Thyroid
BTBD16	10	124030821	124097676	0.039	1.37717	0.168	Thyroid
ZBTB32	19	36203830	36207939	0.21	1.37962	0.168	Thyroid
FUT4	11	94277017	94283062	0.028	-1.37606	0.1688	Thyroid
NPR1	1	153651164	153666467	0.018	-1.37466	0.169	Thyroid
PTGR2	14	74318534	74352166	0.29	1.37478	0.169	Thyroid
PWRN1	15	24778839	24832924	0.19	-1.37511	0.169	Thyroid
CPPED1	16	12753657	12897744	0.042	1.3751	0.169	Thyroid
C16orf46	16	81087103	81110872	0.035	1.3755	0.169	Thyroid
COQ2	4	84182689	84205964	0.047	1.37447	0.16929	Thyroid
TAS2R4	7	141478289	141479188	0.063	1.37299	0.16976	Thyroid
ANO9	11	417930	442011	0.02	-1.37256	0.16989	Thyroid
MAEL	1	166958519	166991447	0.26	1.37146	0.17	Thyroid
WWOX	16	78133551	79246563	0.11	-1.371	0.17	Thyroid
GNA15	19	3136191	3163766	0.023	-1.37215	0.17	Thyroid
ZNF333	19	14800613	14831770	0.05	-1.37148	0.17	Thyroid
TMEM161A	19	19230431	19249267	0.11	-1.3721	0.17	Thyroid
RPL23AP32	2	54756359	54756978	0.04	1.37199	0.17	Thyroid
C6orf208	6	170190169	170202969	0.12	-1.36941	0.17087	Thyroid
PMM1	22	41972890	41985871	0.11	-1.36776	0.17139	Thyroid
MIOS	7	7606616	7647103	0.019	1.36667	0.17173	Thyroid
PCDH8	13	53418111	53422774	0.03	1.3665	0.171793	Thyroid
PPM1J	1	113252616	113257950	0.12	1.36448	0.172	Thyroid
NGRN	15	90808895	90815443	0.0059	-1.36458	0.172	Thyroid
RPS19	19	42363988	42375482	0.021	-1.36611	0.172	Thyroid
VAX2	2	71127720	71160573	0.026	-1.36649	0.172	Thyroid
OMG	17	29621669	29624380	0.019	-1.36516	0.172203	Thyroid
PHIP	6	79644137	79788011	0.077	1.3649	0.172286	Thyroid
C6orf115	6	139349819	139364439	0.071	-1.36415	0.172521	Thyroid
DNAL4	22	39174514	39190161	0.11	-1.36342	0.17275	Thyroid
LIAS	4	39460665	39479269	0.052	-1.363	0.17288	Thyroid
GJA4	1	35258171	35261346	0.035	1.364	0.173	Thyroid
CCDC85C	14	99977604	100070727	0.046	-1.36283	0.173	Thyroid
LOC285593	5	173006646	173012074	0.13	-1.36153	0.173	Thyroid
LOC729603	6	160514114	160517244	0.043	-1.36166	0.173304	Thyroid
NAF1	4	164047860	164088073	0.055	1.3613	0.17342	Thyroid
REP15	12	27849428	27850566	0.083	1.36088	0.17355	Thyroid
MAGOHB	12	10756794	10766183	0.068	1.35981	0.17389	Thyroid
SLC25A4	4	186064398	186068424	0.027	1.3597	0.17393	Thyroid
ZNF283	19	44331473	44353048	0.053	-1.358	0.174	Thyroid
C6orf120	6	170102233	170106401	0.015	1.35833	0.174358	Thyroid
TMEM223	11	62557787	62559486	0.027	-1.35764	0.17458	Thyroid
ABCC4	13	95672084	95953687	0.038	1.3575	0.174607	Thyroid
SLC35D1	1	67465015	67520080	0.2	1.35769	0.175	Thyroid
SLAMF9	1	159921284	159924044	0.02	-1.357	0.175	Thyroid
PXDNL	8	52232144	52722005	0.14	1.35764	0.175	Thyroid
MADD	11	47290927	47351582	0.029	-1.35578	0.17517	Thyroid
MEI1	22	42095518	42195459	0.026	1.35485	0.17547	Thyroid
SNAPC1	14	62229075	62263145	0.16	-1.35359	0.176	Thyroid
SV2B	15	91643183	91838648	0.081	-1.35179	0.176	Thyroid
TCF25	16	89939994	89977792	0.013	-1.3544	0.176	Thyroid
CABYR	18	21718955	21741563	0.019	1.3544	0.176	Thyroid
FOXN2	2	48541795	48606434	0.024	1.35335	0.176	Thyroid
LNP1	3	100120037	100175169	0.2	1.354	0.176	Thyroid
SH3GL2	9	17578953	17797120	0.05	-1.35372	0.176	Thyroid
SLC22A1	6	160542863	160579748	0.047	1.35097	0.176706	Thyroid
CCDC67	11	93063156	93171634	0.084	1.3503	0.17692	Thyroid
PTER	10	16478967	16555736	0.035	1.35055	0.177	Thyroid
CCDC102A	16	57546092	57570477	0.1	-1.3507	0.177	Thyroid
TNIP2	4	2743387	2758103	0.033	1.34952	0.17717	Thyroid
EZH2	7	148504475	148581414	0.063	1.34894	0.17736	Thyroid
C17orf108	17	26205341	26220409	0.062	-1.34769	0.177758	Thyroid
EXOSC9	4	122722472	122738175	0.053	1.34738	0.17786	Thyroid
BMP8A	1	39957318	39995537	0.047	1.34725	0.178	Thyroid
SDHC	1	161284166	161334533	0.031	-1.34797	0.178	Thyroid
NAT14	19	55996594	55998935	0.083	-1.34606	0.178	Thyroid
SSC5D	19	55999870	56030465	0.066	-1.34606	0.178	Thyroid
PPT1	1	40538382	40563142	0.073	-1.3433	0.179	Thyroid
PTPN14	1	214531011	214724642	0.026	-1.34268	0.179	Thyroid
ANKRD43	5	132149033	132152488	0.03	-1.34247	0.179	Thyroid
ZFAND1	8	82613958	82633530	0.1	-1.34305	0.179	Thyroid
LOC650368	11	3402191	3430378	0.017	-1.34341	0.17914	Thyroid
SENP1	12	48436758	48500091	0.014	1.34247	0.17944	Thyroid
RARS2	6	88224098	88299735	0.037	-1.34213	0.179552	Thyroid
LOC387647	10	29698483	29776785	0.2	-1.33991	0.18	Thyroid
BTBD9	6	38136228	38607924	0.019	-1.33708	0.181195	Thyroid
TAS2R5	7	141490017	141491166	0.052	-1.33602	0.18154	Thyroid
DEPDC7	11	33037410	33055126	0.022	-1.3355	0.18171	Thyroid
IFIT1	10	91152322	91163742	0.028	1.33603	0.182	Thyroid
AP3D1	19	2100994	2151556	0.052	1.33482	0.182	Thyroid
VPS24	2	86730554	86948245	0.039	1.33467	0.182	Thyroid
ZNF641	12	48735912	48745021	0.12	1.33447	0.18205	Thyroid
TOMM7	7	22852254	22862421	0.16	-1.33433	0.18209	Thyroid
DSCAM	21	41384343	42219039	0.15	-1.33413	0.1822	Thyroid
SLC16A3	17	80186293	80219004	0.082	1.33349	0.182373	Thyroid
LRRC4	7	127667126	127671002	0.12	1.33224	0.18278	Thyroid
MRPL43	10	102737579	102747272	0.26	-1.33191	0.183	Thyroid
BTBD6	14	105714879	105717426	0.14	1.3327	0.183	Thyroid
OSCAR	19	54597935	54605994	0.037	1.33047	0.183	Thyroid
TMEM173	5	138855550	138862292	0.039	-1.33084	0.183	Thyroid
DDT	22	24237099	24322019	0.1	1.32964	0.18364	Thyroid
NRBF2	10	64893007	64914785	0.1	-1.3292	0.184	Thyroid
SNW1	14	78183946	78227497	0.066	-1.32874	0.184	Thyroid
FIBP	11	65651212	65656010	0.017	1.32844	0.18403	Thyroid
AMIGO1	1	110049447	110052336	0.16	1.32555	0.185	Thyroid
ATP5S	14	50779047	50802274	0.08	-1.32659	0.185	Thyroid
PPWD1	5	64859131	64883368	0.076	1.32548	0.185	Thyroid
PRKAR1B	7	589387	767287	0.061	1.32548	0.18501	Thyroid
TMTC4	13	101256091	101327103	0.097	1.3234	0.18571	Thyroid
SSR1	6	7281290	7313541	0.021	1.32283	0.185892	Thyroid
SEPT15	1	87328130	87380107	0.031	-1.32356	0.186	Thyroid
WDR3	1	118472372	118503049	0.059	-1.32143	0.186	Thyroid
TPPP	5	659978	693510	0.037	1.32265	0.186	Thyroid
EMB	5	49692033	49737234	0.042	1.32121	0.186	Thyroid
ASAH1	8	17913925	17942507	0.09	1.32152	0.186	Thyroid
PPA2	4	106290235	106395227	0.042	-1.32201	0.18616	Thyroid
EYA3	1	28300819	28415131	0.02	1.31964	0.187	Thyroid
MMACHC	1	45965856	45976737	0.058	1.32088	0.187	Thyroid
LRRC52	1	165513478	165533185	0.033	-1.31806	0.187	Thyroid
COQ6	14	74416643	74429811	0.034	-1.3199	0.187	Thyroid
DCAF13	8	104426942	104455678	0.054	1.32008	0.187	Thyroid
GRK1	13	114321597	114438636	0.24	1.3184	0.187356	Thyroid
SELM	22	31500765	31516055	0.0081	-1.31778	0.18758	Thyroid
TMEM26	10	63166401	63213208	0.13	1.316	0.188	Thyroid
GCKR	2	27719706	27746548	0.13	1.31783	0.188	Thyroid
LRRFIP1	2	238536224	238690288	0.015	1.31675	0.188	Thyroid
C22orf34	22	49808176	50051190	0.17	1.31638	0.18805	Thyroid
PHF10	6	170104004	170124106	0.071	1.31563	0.1883	Thyroid
TRPV6	7	142568960	142583477	0.024	-1.31486	0.18856	Thyroid
GLP1R	6	39016557	39055519	0.064	1.3139	0.188879	Thyroid
PMS2L1	7	99918263	99933930	0.037	-1.31382	0.18891	Thyroid
C16orf13	16	684429	686347	0.023	1.3149	0.189	Thyroid
LOC100009676	3	101395274	101398055	0.088	1.3144	0.189	Thyroid
ATG16L2	11	72525451	72554715	0.11	1.31346	0.18903	Thyroid
RABEP1	17	5185558	5289131	0.035	-1.31152	0.189681	Thyroid
HFM1	1	91726324	91870426	0.14	1.31062	0.19	Thyroid
BNIPL	1	151009029	151020076	0.13	1.30948	0.19	Thyroid
MRPL24	1	156707094	156710923	0.027	1.31149	0.19	Thyroid
EDEM3	1	184659627	184724041	0.038	-1.31099	0.19	Thyroid
SLC5A6	2	27422459	27435071	0.097	1.3118	0.19	Thyroid
TOP3A	17	18177235	18218321	0.07	-1.30951	0.190361	Thyroid
RRP7A	22	42908575	42915808	0.4	-1.30935	0.19042	Thyroid
DOCK9	13	99445741	99738660	0.024	-1.3081	0.190823	Thyroid
FLJ23867	1	180167144	180169857	0.12	1.30679	0.191	Thyroid
C14orf174	14	77843762	77857587	0.14	-1.30762	0.191	Thyroid
FAM136A	2	70523109	70529220	0.043	-1.30691	0.191	Thyroid
TCTA	3	49449639	49453908	0.037	1.3063	0.191	Thyroid
MUT	6	49398994	49431031	0.16	-1.30701	0.19121	Thyroid
UTS2	1	7903144	7973294	0.15	-1.30536	0.192	Thyroid
CHST3	10	73724120	73773321	0.032	1.30441	0.192	Thyroid
NPRL3	16	134273	188672	0.12	1.3051	0.192	Thyroid
CP110	16	19535179	19564726	0.013	1.3032	0.192	Thyroid
ZNF554	19	2819872	2836733	0.091	1.30564	0.192	Thyroid
LRRC37B2	17	28903483	28992715	0.086	-1.3044	0.192097	Thyroid
ST6GALNAC2	17	74561462	74582145	0.16	-1.30139	0.193126	Thyroid
MRPL42	12	93861270	93896431	0.028	1.29993	0.19362	Thyroid
INTS4	11	77589768	77705717	0.23	1.29948	0.19378	Thyroid
MECR	1	29519385	29557454	0.16	-1.29855	0.194	Thyroid
TC2N	14	92246269	92333880	0.064	-1.29857	0.194	Thyroid
PPP1R13L	19	45882893	45909607	0.029	-1.29855	0.194	Thyroid
USP34	2	61414591	61697849	0.021	1.2976	0.194	Thyroid
ZC3H8	2	112973439	113012664	0.056	-1.29831	0.194	Thyroid
LOC100133612	1	3816968	3833877	0.03	1.29597	0.195	Thyroid
RPS28	19	8386384	8387278	0.52	1.29478	0.195	Thyroid
NEB	2	152341855	152590989	0.083	-1.29481	0.195	Thyroid
SLC38A11	2	165754812	165812035	0.13	-1.29673	0.195	Thyroid
FARP2	2	242295711	242434255	0.085	-1.29728	0.195	Thyroid
DAP	5	10679343	10761387	0.067	-1.29529	0.195	Thyroid
LIME1	20	62367053	62370459	0.044	-1.29548	0.19515	Thyroid
TMPRSS3	21	43791996	43816200	0.053	-1.2954	0.1952	Thyroid
C1orf27	1	186344890	186390502	0.079	1.29431	0.196	Thyroid
ZNF22	10	45496273	45500776	0.017	1.29428	0.196	Thyroid
DCAF4	14	73393040	73426356	0.28	-1.29431	0.196	Thyroid
C2orf40	2	106682113	106694601	0.052	1.29207	0.196	Thyroid
ITGB5	3	124481796	124606144	0.024	-1.294	0.196	Thyroid
PKNOX1	21	44394643	44453688	0.063	-1.29129	0.1966	Thyroid
FBXO42	1	16576560	16678948	0.058	-1.28892	0.197	Thyroid
LOC645431	14	65877313	65879335	0.15	1.28892	0.197	Thyroid
BIN1	2	127805607	127864864	0.12	1.29071	0.197	Thyroid
CTNS	17	3539762	3566396	0.16	1.2885	0.197573	Thyroid
TSPAN14	10	82214038	82282390	0.12	-1.28617	0.198	Thyroid
LBXCOR1	15	68117941	68126174	0.029	1.28616	0.198	Thyroid
FASTKD1	2	170386265	170430424	0.029	-1.28811	0.198	Thyroid
TRIM65	17	73885042	73893054	0.17	1.2866	0.198233	Thyroid
MAP1LC3A	20	33134692	33148149	0.014	-1.28592	0.19847	Thyroid
GIMAP4	7	150264458	150271040	0.1	-1.28575	0.19853	Thyroid
IDUA	4	980785	998316	0.11	1.28566	0.19856	Thyroid
NAPB	20	23355157	23402156	0.017	1.28542	0.19865	Thyroid
GDAP2	1	118406108	118472302	0.023	-1.28348	0.199	Thyroid
DHRS2	14	24099324	24114846	0.094	-1.28452	0.199	Thyroid
NMNAT3	3	139279041	139396840	0.12	-1.2851	0.199	Thyroid
CCDC40	17	78010435	78074410	0.18	-1.28301	0.199489	Thyroid
PIGP	21	38437664	38445458	0.49	-1.28307	0.1995	Thyroid
SRP54	14	35452104	35498771	0.026	1.28276	0.2	Thyroid
HP	16	72088508	72094957	0.22	1.281	0.2	Thyroid
TBC1D26	17	15635591	15649480	0.062	-1.28088	0.200236	Thyroid
C6orf41	6	26924772	26991752	0.023	-1.27959	0.200688	Thyroid
SLC16A9	10	61410522	61469649	0.049	1.27772	0.201	Thyroid
HAPLN4	19	19366453	19384074	0.095	1.28011	0.201	Thyroid
KCTD16	5	143550437	143856944	0.041	-1.27914	0.201	Thyroid
SLC46A1	17	26721661	26733228	0.019	1.27752	0.201419	Thyroid
RNF216L	7	5013616	5037798	0.45	-1.27746	0.20144	Thyroid
PCBP3	21	47063683	47362367	0.059	1.27682	0.2017	Thyroid
TGS1	8	56685791	56738003	0.11	-1.27513	0.202	Thyroid
YIPF7	4	44624354	44653658	0.03	1.2748	0.20238	Thyroid
PRR15L	17	46029335	46035110	0.042	-1.27446	0.202501	Thyroid
ZNF593	1	26496388	26497362	0.14	1.27281	0.203	Thyroid
GPX7	1	53068043	53074722	0.29	1.273	0.203	Thyroid
DTYMK	2	242615157	242626227	0.069	1.27258	0.203	Thyroid
FAM174A	5	99871124	99922440	0.014	1.27423	0.203	Thyroid
PTRH1	9	130455277	130487152	0.064	1.27195	0.203	Thyroid
CATSPER1	11	65784224	65793988	0.021	1.27219	0.20331	Thyroid
PSMB3	17	36909002	36920477	0.057	1.27218	0.20331	Thyroid
SNX11	17	46184911	46200105	0.056	1.2713	0.203623	Thyroid
TXNRD2	22	19863040	19929359	0.17	-1.26973	0.20418	Thyroid
P2RX1	17	3799889	3819960	0.025	1.26941	0.204294	Thyroid
TRIM66	11	8633586	8693413	0.5	-1.26748	0.20498	Thyroid
ITIH5	10	7601636	7708934	0.013	1.26803	0.205	Thyroid
THOP1	19	2785506	2813590	0.25	1.26827	0.205	Thyroid
TCF20	22	42556019	42611445	0.021	-1.2664	0.20537	Thyroid
UGGT2	13	96453838	96705736	0.065	-1.2658	0.205572	Thyroid
TBCE	1	235530728	235612280	0.043	1.26335	0.206	Thyroid
ABL2	1	179068463	179198819	0.037	-1.26147	0.207	Thyroid
SRP14	15	40327891	40331389	0.069	-1.26079	0.207	Thyroid
MON1B	16	77224836	77233541	0.19	-1.2619	0.207	Thyroid
WDR54	2	74648885	74652881	0.04	-1.26178	0.207	Thyroid
GKAP1	9	86354337	86444431	0.064	1.26066	0.207	Thyroid
EPS8L2	11	706120	727726	0.048	-1.26165	0.20707	Thyroid
MS4A14	11	60145958	60185226	0.4	-1.26144	0.20715	Thyroid
FOXRED2	22	36883234	36903148	0.096	1.26058	0.20746	Thyroid
HLA-DRB6	6	32520490	32552155	0.11	1.25993	0.207695	Thyroid
PKD1L1	7	47814290	47988037	0.032	1.25966	0.20779	Thyroid
TIMM17A	1	201924619	201939787	0.052	-1.25932	0.208	Thyroid
PATL2	15	44957931	44969086	0.041	-1.25849	0.208	Thyroid
HIBCH	2	191069361	191184559	0.32	1.2583	0.208	Thyroid
TXNDC15	5	134209460	134237323	0.066	1.2595	0.208	Thyroid
ANXA5	4	122589153	122618147	0.14	-1.25797	0.2084	Thyroid
GLT8D2	12	104382765	104457961	0.023	-1.2578	0.20846	Thyroid
ACBD4	17	43209967	43221541	0.023	1.25699	0.208756	Thyroid
TNNI3K	1	74663926	75010108	0.3	-1.25595	0.209	Thyroid
SPAG17	1	118496288	118727848	0.033	1.25546	0.209	Thyroid
OCEL1	19	17337055	17340027	0.11	-1.25634	0.209	Thyroid
HIGD1A	3	42824402	42846027	0.12	1.2552	0.209	Thyroid
ZNF454	5	178368224	178393434	0.077	-1.2551	0.209	Thyroid
TRPV1	17	3468741	3512705	0.098	-1.25455	0.209642	Thyroid
RNF216	7	5659678	5821292	0.024	-1.25416	0.20978	Thyroid
HRNR	1	152184558	152196669	0.11	1.25451	0.21	Thyroid
NEURL1B	5	172068276	172118531	0.04	1.253	0.21	Thyroid
C1orf58	1	222885906	222906106	0.085	1.25018	0.211	Thyroid
RABGGTA	14	24734746	24740803	0.014	-1.25012	0.211	Thyroid
RTF1	15	41709302	41775760	0.02	-1.25167	0.211	Thyroid
ZNF460	19	57791419	57805436	0.04	1.25037	0.211	Thyroid
ATG12	5	115165818	115177520	0.058	-1.25182	0.211	Thyroid
C8orf79	8	12803151	12889011	0.042	-1.25079	0.211	Thyroid
MTAP	9	21802635	22029593	0.036	-1.24964	0.211	Thyroid
MDFI	6	41604930	41621981	0.094	-1.25079	0.211011	Thyroid
PFKL	21	45719925	45747260	0.0099	1.25	0.2113	Thyroid
SFRS13B	6	89805679	89827800	0.14	-1.2492	0.21159	Thyroid
C11orf54	11	93474793	93496246	0.36	1.24854	0.21183	Thyroid
GBP7	1	89597434	89641723	0.2	1.24838	0.212	Thyroid
HKDC1	10	70980059	71027314	0.14	1.24861	0.212	Thyroid
IL32	16	3115313	3119667	0.065	-1.2481	0.212	Thyroid
SPHK2	19	49122548	49133973	0.065	-1.24748	0.212	Thyroid
SEC1	19	49141296	49185501	0.15	1.24748	0.212	Thyroid
TMBIM6	12	50135293	50158717	0.015	1.24771	0.21214	Thyroid
TRIM45	1	117653677	117664414	0.087	-1.24604	0.213	Thyroid
ARL16	17	79648234	79650954	0.38	-1.24506	0.21311	Thyroid
DENND2A	7	140218227	140341286	0.014	-1.2434	0.21372	Thyroid
S100A3	1	153519809	153521734	0.072	-1.24237	0.214	Thyroid
TSHR	14	81421869	81612646	0.025	1.24144	0.214	Thyroid
POMC	2	25383722	25391559	0.044	-1.24143	0.214	Thyroid
TREX1	3	48501186	48509043	0.087	1.2421	0.214	Thyroid
PYY2	17	26553589	26555083	0.036	-1.24205	0.214218	Thyroid
LOC100133893	12	27915599	27924209	0.06	1.24166	0.21436	Thyroid
TRIM37	17	57060002	57184266	0.046	1.24005	0.214956	Thyroid
MYO5C	15	52484519	52587970	0.089	1.24062	0.215	Thyroid
ZNF696	8	144373559	144382118	0.019	-1.23898	0.215	Thyroid
SLC39A4	8	145635777	145642273	0.081	1.24072	0.215	Thyroid
ADPGK	15	73043710	73076667	0.033	1.23595	0.216	Thyroid
HSD17B4	5	118788148	118878027	0.096	-1.23717	0.216	Thyroid
POMT1	9	134378289	134399192	0.04	-1.23717	0.216	Thyroid
TGM2	20	36756866	36793700	0.037	-1.23657	0.21625	Thyroid
GALNTL4	11	11292421	11643561	0.14	-1.23525	0.21674	Thyroid
TEP1	14	20833826	20881579	0.071	1.23479	0.217	Thyroid
GZMB	14	25100161	25103432	0.025	1.2339	0.217	Thyroid
LGALS7	19	39261608	39264157	0.094	-1.23429	0.217	Thyroid
ZNF468	19	53341786	53360902	0.15	-1.23426	0.217	Thyroid
C19orf18	19	58469807	58485902	0.024	1.23542	0.217	Thyroid
MGC2752	19	59086766	59110850	0.037	1.23321	0.217	Thyroid
C6orf225	6	112408674	112423992	0.14	-1.23269	0.217693	Thyroid
EFCAB6	22	43924654	44208118	0.032	-1.23201	0.21795	Thyroid
FXYD5	19	35645627	35660785	0.03	1.2314	0.218	Thyroid
ZNF329	19	58637619	58666477	0.076	-1.23283	0.218	Thyroid
EFHB	3	19920968	19988501	0.32	-1.2311	0.218	Thyroid
VAMP1	12	6571406	6579843	0.15	1.23175	0.21804	Thyroid
BOC	3	112930412	113006303	0.05	1.2283	0.219	Thyroid
MMP16	8	89049462	89339717	0.085	1.22964	0.219	Thyroid
NME1	17	49230920	49239450	0.13	1.22766	0.219573	Thyroid
CYP2U1	4	108852717	108874611	0.069	1.22762	0.21959	Thyroid
IVD	15	40697686	40713512	0.23	-1.22668	0.22	Thyroid
CHMP4C	8	82644688	82671746	0.5	-1.2273	0.22	Thyroid
C8orf33	8	146277824	146281415	0.078	1.22604	0.22	Thyroid
TAF6	7	99704694	99717464	0.17	1.22465	0.22071	Thyroid
CTH	1	70876955	70905252	0.061	-1.22312	0.221	Thyroid
CNTN2	1	205012065	205047136	0.11	-1.22467	0.221	Thyroid
NXNL1	19	17566236	17571725	0.046	1.22426	0.221	Thyroid
PAM	5	102201527	102365416	0.1	1.22397	0.221	Thyroid
LRRC19	9	26993143	27005691	0.37	1.22381	0.221	Thyroid
RNF185	22	31556138	31603004	0.085	1.22294	0.22135	Thyroid
CAT	11	34460478	34493603	0.22	-1.22223	0.22162	Thyroid
AKD1	6	109814059	110012415	0.26	-1.22072	0.222194	Thyroid
KLF12	13	74260150	74708394	0.047	1.2207	0.2222	Thyroid
DDO	6	110713384	110736753	0.12	-1.21888	0.22289	Thyroid
ZNF180	19	44979860	45004574	0.045	-1.21896	0.223	Thyroid
NUDT2	9	34329504	34343695	0.38	-1.21784	0.223	Thyroid
SLC39A6	18	33688495	33709357	0.035	1.2171	0.224	Thyroid
PLIN5	19	4522546	4540036	0.046	1.21714	0.224	Thyroid
GPAT2	2	96687695	96701722	0.037	1.21582	0.224	Thyroid
CYP2W1	7	1022835	1029276	0.021	1.21494	0.22439	Thyroid
MAPRE1	20	31407699	31438210	0.067	-1.21378	0.22483	Thyroid
TTYH3	7	2671603	2704427	0.06	1.21336	0.22499	Thyroid
COL24A1	1	86194918	86622446	0.19	1.21322	0.225	Thyroid
CCDC155	19	49891506	49921246	0.032	-1.21315	0.225	Thyroid
MOGS	2	74688185	74692537	0.02	1.21316	0.225	Thyroid
RPL8	8	146015155	146017805	0.11	-1.2138	0.225	Thyroid
HDDC2	6	125596496	125623282	0.13	-1.21133	0.22577	Thyroid
ITFG3	16	284801	319942	0.053	-1.2118	0.226	Thyroid
GOT2	16	58741035	58768246	0.2	-1.2112	0.226	Thyroid
ASNSD1	2	190526125	190535556	0.39	-1.20998	0.226	Thyroid
NCBP2	3	196662273	196669464	0.041	-1.2119	0.226	Thyroid
C6	5	41142336	41261540	0.035	1.20981	0.226	Thyroid
PGCP	8	97657499	98155721	0.064	-1.21079	0.226	Thyroid
SETX	9	135136828	135230372	0.018	-1.21133	0.226	Thyroid
ABHD15	17	27888311	27894048	0.033	1.20873	0.226765	Thyroid
LSM10	1	36859031	36863493	0.046	1.20688	0.227	Thyroid
IFIT5	10	91174325	91180758	0.086	1.20718	0.227	Thyroid
FMNL2	2	153191751	153506346	0.045	-1.20694	0.227	Thyroid
TDGF1	3	46619180	46623950	0.17	1.2071	0.227	Thyroid
KIAA1875	8	145162629	145173218	0.14	1.20739	0.227	Thyroid
CRYL1	13	20977809	21100012	0.049	1.2059	0.227862	Thyroid
LOC441869	1	1353802	1356650	0.067	-1.20625	0.228	Thyroid
LRRC40	1	70610497	70671275	0.078	-1.20501	0.228	Thyroid
BTBD8	1	92545862	92613395	0.027	1.20425	0.228	Thyroid
TRAF3IP1	2	239229185	239309539	0.038	-1.20559	0.228	Thyroid
WDR55	5	140044384	140050551	0.12	-1.2048	0.228	Thyroid
BTNL9	5	180467225	180488522	0.033	-1.20642	0.228	Thyroid
ASRGL1	11	62104774	62160885	0.0055	1.20419	0.22852	Thyroid
LOC100128822	7	152161209	152162628	0.072	-1.20338	0.22883	Thyroid
KLF11	2	10183682	10194963	0.1	1.20237	0.229	Thyroid
COMMD10	5	115420727	115628978	0.066	1.20369	0.229	Thyroid
RIPK1	6	3064122	3115419	0.19	-1.20217	0.229296	Thyroid
PL-5283	7	135347221	135378160	0.42	-1.20203	0.22935	Thyroid
GDPD3	16	30116132	30124878	0.049	1.2016	0.23	Thyroid
LYPD5	19	44300080	44324808	0.13	-1.20038	0.23	Thyroid
ORMDL1	2	190634994	190649097	0.25	1.20068	0.23	Thyroid
C8orf55	8	143808621	143818350	0.17	-1.19974	0.23	Thyroid
GCNT1	9	79034752	79122330	0.094	-1.2015	0.23	Thyroid
VSX1	20	25052132	25062767	0.02	-1.20009	0.2301	Thyroid
TFCP2	12	51488608	51566917	0.049	-1.19981	0.23021	Thyroid
LOC121952	13	103532449	103548383	0.13	-1.1992	0.230468	Thyroid
RNASE4	14	21152336	21168757	0.021	1.19699	0.231	Thyroid
ECT2L	6	139134309	139225207	0.1	-1.19759	0.231077	Thyroid
C17orf58	17	65987218	65989765	0.018	1.19649	0.231505	Thyroid
ELOVL6	4	110970230	111119820	0.0046	-1.19594	0.23172	Thyroid
FAH	15	80445131	80478682	0.035	1.19605	0.232	Thyroid
HLTF	3	148747904	148804341	0.11	-1.1939	0.232	Thyroid
HACE1	6	105175968	105307794	0.059	-1.19378	0.232565	Thyroid
PHYHD1	9	131683174	131704320	0.26	-1.19248	0.233	Thyroid
TMEM101	17	42088557	42092415	0.028	1.19084	0.233716	Thyroid
TPD52	8	80831096	81083836	0.026	1.19011	0.234	Thyroid
ZNF815	7	5862791	5894066	0.078	-1.18916	0.23438	Thyroid
KCNK15	20	43374488	43379666	0.025	-1.18856	0.23461	Thyroid
CHMP6	17	78965641	78973932	0.22	1.18831	0.234713	Thyroid
NEIL1	15	75639331	75647586	0.12	-1.18843	0.235	Thyroid
ATRIP	3	48488141	48507708	0.056	-1.1864	0.235	Thyroid
STK32A	5	146614579	146764241	0.039	1.18634	0.235	Thyroid
TPCN2	11	68816350	68929907	0.054	-1.18751	0.23503	Thyroid
HEXDC	17	80376252	80400515	0.036	1.18713	0.235177	Thyroid
CCDC28A	6	139094657	139114454	0.057	-1.18619	0.235549	Thyroid
ADPRHL1	13	114076260	114107839	0.031	-1.1852	0.235953	Thyroid
FAM7A3	15	30395935	30423946	0.044	-1.18458	0.236	Thyroid
LYSMD4	15	100255906	100273626	0.084	1.18516	0.236	Thyroid
DBNDD1	16	90071279	90086328	0.041	-1.1847	0.236	Thyroid
CYS1	2	10196926	10220538	0.51	1.18521	0.236	Thyroid
C5orf35	5	56205103	56213010	0.63	1.1858	0.236	Thyroid
URM1	9	131133598	131153015	0.075	-1.1857	0.236	Thyroid
LOC642852	21	46707967	46717268	0.28	-1.18275	0.2369	Thyroid
RNF207	1	6266189	6281351	0.059	1.18376	0.237	Thyroid
TDRD12	19	33210679	33312166	0.034	-1.18245	0.237	Thyroid
TULP2	19	49384222	49401996	0.033	1.18195	0.237	Thyroid
ZNF354A	5	178138531	178157703	0.082	1.18346	0.237	Thyroid
LRWD1	7	102105390	102113610	0.053	1.18248	0.23701	Thyroid
DSCR9	21	38580804	38594036	0.027	-1.18118	0.2375	Thyroid
SUPT3H	6	44777054	45345670	0.047	-1.18118	0.237531	Thyroid
RPA1	17	1733273	1802848	0.091	1.1809	0.237641	Thyroid
STARD3NL	7	38217933	38270269	0.31	1.18026	0.2379	Thyroid
WDR93	15	90234028	90286868	0.097	1.18101	0.238	Thyroid
VWDE	7	12370509	12443852	0.32	-1.17984	0.23806	Thyroid
POLR2J2	7	102277472	102312182	0.16	1.17892	0.23843	Thyroid
FAM118A	22	45705081	45737834	0.46	1.17813	0.23875	Thyroid
FMN2	1	240255185	240638483	0.059	1.17715	0.239	Thyroid
TTLL5	14	76127621	76421421	0.054	-1.17796	0.239	Thyroid
C2orf73	2	54558071	54588714	0.32	-1.17795	0.239	Thyroid
RASGRF2	5	80256558	80521953	0.07	1.17745	0.239	Thyroid
GNGT2	17	47283597	47286743	0.057	1.17688	0.239242	Thyroid
TMEM128	4	4237269	4249959	0.13	1.17647	0.23941	Thyroid
FABP3	1	31838100	31845923	0.0052	-1.17437	0.24	Thyroid
ATP5SL	19	41937224	41945810	0.021	1.17541	0.24	Thyroid
MCCC1	3	182733008	182833860	0.024	1.1739	0.24	Thyroid
SLC30A5	5	68389818	68425879	0.033	1.17387	0.24	Thyroid
KIAA1671	22	25423941	25593413	0.14	1.17465	0.24014	Thyroid
NDUFA12	12	95365112	95397511	0.023	1.17367	0.24053	Thyroid
FAM86C	11	71498557	71512276	0.22	1.17339	0.24064	Thyroid
PTTG1IP	21	46269513	46293741	0.15	1.17306	0.2408	Thyroid
LOC149837	20	5479218	5485242	0.068	-1.1727	0.24092	Thyroid
RBM25	14	73525221	73588074	0.011	1.17137	0.241	Thyroid
CYP8B1	3	42897498	42917633	0.035	1.1717	0.241	Thyroid
MAP6D1	3	183533664	183543393	0.07	1.1721	0.241	Thyroid
BRD3	9	136895454	136933655	0.21	1.17362	0.241	Thyroid
DNAH10	12	124247042	124420265	0.03	-1.17224	0.2411	Thyroid
SUSD2	22	24577444	24585074	0.047	1.17069	0.24172	Thyroid
B3GNT8	19	41931265	41934635	0.12	-1.16955	0.242	Thyroid
XRCC1	19	44047464	44079730	0.35	1.17047	0.242	Thyroid
ZFAND2A	7	1192544	1199855	0.56	-1.16972	0.24212	Thyroid
C11orf58	11	16760148	16779901	0.037	1.16901	0.2424	Thyroid
PMS2L11	7	76610139	76673095	0.093	1.1686	0.24257	Thyroid
C11orf73	11	86013253	86056984	0.13	1.16768	0.24293	Thyroid
ST6GALNAC3	1	76540389	77096669	0.18	1.16781	0.243	Thyroid
GPLD1	6	24428405	24489850	0.076	-1.16577	0.243707	Thyroid
OR2L13	1	248100493	248264223	0.25	1.16455	0.244	Thyroid
MIPOL1	14	37667118	38016865	0.072	1.16549	0.244	Thyroid
BMF	15	40380094	40401075	0.02	-1.16448	0.244	Thyroid
C15orf52	15	40623654	40633168	0.067	-1.16615	0.244	Thyroid
NDUFA10	2	240900158	240964798	0.26	-1.1651	0.244	Thyroid
STX19	3	93733215	93747454	0.093	-1.1647	0.244	Thyroid
KLHL24	3	183353411	183402302	0.095	1.1644	0.244	Thyroid
FAM153C	5	177433973	177476088	0.072	1.16567	0.244	Thyroid
NIPAL1	4	48018791	48039078	0.14	-1.16424	0.24433	Thyroid
RBM44	2	238707388	238751450	0.15	-1.16312	0.245	Thyroid
RCVRN	17	9801027	9808684	0.077	-1.16248	0.245041	Thyroid
MRE11A	11	94150469	94227040	0.088	1.16184	0.2453	Thyroid
MAPK12	22	50688492	50700089	0.013	1.16171	0.24535	Thyroid
PAAF1	11	73588033	73638779	0.42	1.15812	0.24682	Thyroid
HIGD2A	5	175815784	175816750	0.28	-1.15827	0.247	Thyroid
ZFPM2	8	106331147	106816765	0.054	-1.1578	0.247	Thyroid
HIATL1	9	97136833	97223201	0.088	-1.15674	0.247	Thyroid
ZNF268	12	133707213	133781730	0.086	1.1575	0.24707	Thyroid
ENTPD6	20	25176339	25207360	0.14	1.1566	0.24743	Thyroid
ATP13A2	1	17312453	17338423	0.11	1.15427	0.248	Thyroid
DNAJB12	10	74092588	74114907	0.096	-1.15598	0.248	Thyroid
ADK	10	75910965	76469059	0.16	1.15486	0.248	Thyroid
C12orf61	12	62995531	62997214	0.035	-1.15407	0.24847	Thyroid
TBCK	4	106967233	107237861	0.22	1.154	0.2485	Thyroid
C12orf73	12	104343981	104359473	0.14	-1.15299	0.24892	Thyroid
GBAP1	1	155183617	155197325	0.022	1.15334	0.249	Thyroid
NAT8	2	73867850	73869537	0.09	1.15335	0.249	Thyroid
SMARCD3	7	150936060	150974231	0.027	-1.15106	0.24971	Thyroid
RAP1GAP	1	21922709	21995856	0.026	1.15026	0.25	Thyroid
TNNI1	1	201372895	201398994	0.36	-1.1494	0.25	Thyroid
ZNF681	19	23921999	23941693	0.028	-1.15	0.25	Thyroid
F2RL2	5	75911308	75919240	0.13	-1.15096	0.25	Thyroid
LOC100133669	8	144063448	144099807	0.28	-1.15076	0.25	Thyroid
PSMB7	9	127115745	127177721	0.056	-1.15006	0.25	Thyroid
KCNJ1	11	128707915	128737268	0.11	1.14877	0.25065	Thyroid
THNSL2	2	88469835	88486145	0.68	-1.14884	0.251	Thyroid
LYPD6	2	150187113	150330137	0.011	-1.14842	0.251	Thyroid
CPA6	8	68334406	68658620	0.046	1.14846	0.251	Thyroid
C9orf68	9	4553386	4666666	0.35	1.14862	0.251	Thyroid
DCHS2	4	155155527	155412930	0.061	-1.14787	0.25102	Thyroid
PANX1	11	93862094	93915135	0.12	1.14661	0.25154	Thyroid
MYT1	20	62783144	62873604	0.036	1.1461	0.25175	Thyroid
CSE1L	20	47662838	47713484	0.2	1.14585	0.25186	Thyroid
CLCNKA	1	16345370	16360544	0.11	-1.14471	0.252	Thyroid
PPP1R3C	10	93388201	93392858	0.027	-1.14554	0.252	Thyroid
C18orf22	18	77794358	77853788	0.1	-1.1457	0.252	Thyroid
GCC2	2	109065577	109125853	0.22	-1.14538	0.252	Thyroid
EEFSEC	3	127872313	128127488	0.036	-1.1467	0.252	Thyroid
HGSNAT	8	42995592	43057969	0.04	-1.14529	0.252	Thyroid
PDCD1LG2	9	5510545	5571281	0.18	-1.14448	0.252	Thyroid
C9orf78	9	132589565	132597572	0.1	1.14543	0.252	Thyroid
ST3GAL3	1	44171495	44396830	0.19	-1.14402	0.253	Thyroid
ARIH1	15	72766667	72878895	0.059	1.14322	0.253	Thyroid
LMF1	16	903635	1031318	0.11	1.1428	0.253	Thyroid
PPIL1	6	36822606	36842800	0.11	1.14077	0.253966	Thyroid
ZNF25	10	38238795	38265453	0.049	1.1404	0.254	Thyroid
ZFP14	19	36827162	36870098	0.14	-1.14086	0.254	Thyroid
SLC27A5	19	58990880	59023432	0.019	-1.13959	0.254	Thyroid
EIF4EBP3	5	139927251	139929163	0.014	-1.14148	0.254	Thyroid
INTS8	8	95835534	95892720	0.039	1.14021	0.254	Thyroid
GALT	9	34646635	34650571	0.13	-1.14081	0.254	Thyroid
YWHAB	20	43514344	43537160	0.13	-1.14049	0.25408	Thyroid
AASDH	4	57204459	57253638	0.03	1.14044	0.2541	Thyroid
RXRG	1	165370351	165414430	0.046	1.13793	0.255	Thyroid
FLJ10661	8	8086092	8102386	0.014	1.13856	0.255	Thyroid
UBE2R2	9	33817182	33920399	0.051	-1.13761	0.255	Thyroid
STXBP4	17	53046126	53241449	0.063	1.13824	0.25502	Thyroid
ZNF30	19	35417807	35436076	0.15	-1.13666	0.256	Thyroid
C3orf10	3	10157333	10168873	0.039	1.1351	0.256	Thyroid
ATG9B	7	150709306	150721586	0.045	-1.13581	0.25604	Thyroid
CST1	20	23728191	23731574	0.087	-1.13498	0.25639	Thyroid
TBC1D7	6	13266774	13328770	0.13	-1.13433	0.256656	Thyroid
C2CD4C	19	405444	409170	0.083	-1.13319	0.257	Thyroid
WTIP	19	34972880	34992084	0.11	-1.13319	0.257	Thyroid
DLL3	19	39989557	39999121	0.029	1.13355	0.257	Thyroid
ZNF160	19	53569868	53606687	0.071	-1.13281	0.257	Thyroid
PDE12	3	57541981	57547767	0.022	-1.133	0.257	Thyroid
HINFP	11	118992288	119005764	0.061	1.13289	0.25726	Thyroid
STK31	7	23749838	23944365	0.008	1.13206	0.25761	Thyroid
RNMTL1	17	685513	695740	0.039	1.13084	0.258123	Thyroid
SARNP	12	56146247	56211540	0.021	1.13082	0.25813	Thyroid
CDHR5	11	616577	626078	0.022	1.12979	0.25857	Thyroid
PPIL6	6	109711419	109761990	0.085	-1.12954	0.258671	Thyroid
TMEM25	11	118401803	118417313	0.056	1.12944	0.25871	Thyroid
IFT46	11	118415259	118436750	0.17	1.12944	0.25871	Thyroid
RAP1B	12	69004652	69054377	0.026	-1.12892	0.25893	Thyroid
KCNJ13	2	233630860	233641275	0.0087	1.12955	0.259	Thyroid
SLC9A3	5	473334	524549	0.092	-1.12867	0.259	Thyroid
JOSD1	22	39081549	39096459	0.054	-1.12843	0.25914	Thyroid
CASD1	7	94139170	94186326	0.016	-1.12776	0.25942	Thyroid
UPF3A	13	115047078	115071281	0.15	1.1273	0.259632	Thyroid
ARVCF	22	19957421	20004309	0.023	1.12705	0.25972	Thyroid
ARFGAP3	22	43192532	43253408	0.13	-1.12647	0.25997	Thyroid
CTBS	1	85018804	85040163	0.19	1.12617	0.26	Thyroid
KCTD1	18	24034877	24220308	0.24	1.1263	0.26	Thyroid
NHEJ1	2	219940051	220034817	0.12	1.12661	0.26	Thyroid
CCDC51	3	48473582	48481529	0.013	-1.1264	0.26	Thyroid
PDCD10	3	167401697	167452651	0.038	-1.1267	0.26	Thyroid
ZNF879	5	178450776	178461387	0.054	-1.12626	0.26	Thyroid
TUSC1	9	25676394	25678856	0.081	-1.12584	0.26	Thyroid
PIWIL1	12	130822614	130856872	0.087	1.12621	0.26008	Thyroid
ARHGAP12	10	32095225	32217770	0.026	-1.12332	0.261	Thyroid
ZNF487	10	43932574	43978007	0.07	1.12333	0.261	Thyroid
XPO6	16	28109316	28223190	0.015	1.1247	0.261	Thyroid
ZNF100	19	21906844	21950430	0.062	-1.124	0.261	Thyroid
NCOA1	2	24787179	24993568	0.059	-1.12352	0.261	Thyroid
FNDC4	2	27714751	27718126	0.17	1.12288	0.261	Thyroid
CCDC90A	6	13791021	13814789	0.05	-1.12398	0.261022	Thyroid
PRODH	22	18900295	18924066	0.039	-1.12241	0.26169	Thyroid
KIAA1279	10	70748493	70776734	0.012	-1.12284	0.262	Thyroid
HOMEZ	14	23742844	23768747	0.041	1.12158	0.262	Thyroid
NAGPA	16	5074846	5083936	0.038	-1.1206	0.262	Thyroid
RPS6	9	19376254	19380235	0.016	1.12212	0.262	Thyroid
MAN2B2	4	6576902	6624188	0.1	-1.12026	0.2626	Thyroid
SERINC2	1	31883048	31907524	0.081	-1.11904	0.263	Thyroid
DIRC2	3	122513901	122599983	0.051	1.1195	0.263	Thyroid
SULT4A1	22	44220387	44258378	0.046	-1.11708	0.26396	Thyroid
ZNF396	18	32946661	32957301	0.11	1.1161	0.264	Thyroid
CHCHD4	3	14153578	14166371	0.014	1.1173	0.264	Thyroid
FAM170A	5	118965254	118971516	0.044	1.11602	0.264	Thyroid
LYRM4	6	5108654	5261168	0.16	-1.11638	0.264261	Thyroid
MYOM2	8	1993158	2093379	0.071	1.11495	0.265	Thyroid
RRM1	11	4115924	4223759	0.082	1.11454	0.26505	Thyroid
ZNF664	12	124457670	124499967	0.049	1.11387	0.26534	Thyroid
TYW1B	7	72023729	72298813	0.2	1.11387	0.26534	Thyroid
FAM182B	20	25744102	25848786	0.34	1.11348	0.2655	Thyroid
VPS33A	12	122692210	122751068	0.028	-1.11332	0.26557	Thyroid
LEO1	15	52230225	52263958	0.13	1.11212	0.266	Thyroid
C8orf31	8	144120679	144135720	0.055	1.11166	0.266	Thyroid
RNF144B	6	18387594	18468848	0.053	-1.11045	0.266806	Thyroid
DFFB	1	3773845	3801992	0.068	1.11072	0.267	Thyroid
PDSS1	10	26986595	27035724	0.017	1.11023	0.267	Thyroid
CALCB	11	15095146	15103888	0.037	-1.10938	0.26727	Thyroid
SRPK1	6	35800812	35888956	0.043	-1.10927	0.267314	Thyroid
SLC13A4	7	135365993	135412933	0.24	1.1078	0.26795	Thyroid
GRWD1	19	48949030	48957164	0.074	1.10728	0.268	Thyroid
C8orf37	8	96258235	96281437	0.15	-1.10696	0.268	Thyroid
FBXW8	12	117348761	117470180	0.17	-1.10708	0.26826	Thyroid
C10orf90	10	128113576	128359079	0.27	-1.10564	0.269	Thyroid
GINS2	16	85711281	85722588	0.13	1.1043	0.269	Thyroid
LIMS1	2	109150857	109300887	0.036	1.10462	0.269	Thyroid
ITGB2	21	46305868	46348753	0.072	1.10444	0.2694	Thyroid
C12orf56	12	64660765	64784345	0.051	-1.10422	0.2695	Thyroid
LQK1	1	213029947	213031480	0.74	-1.10359	0.27	Thyroid
LOC728554	5	177302262	177311267	0.02	1.10302	0.27	Thyroid
C11orf41	11	33563877	33695644	0.035	1.10302	0.27002	Thyroid
DPF2	11	65101346	65120450	0.032	1.10271	0.27015	Thyroid
SLC22A18AS	11	2909328	2925175	0.15	1.10226	0.27035	Thyroid
HSPB7	1	16340523	16346089	0.45	-1.09968	0.271	Thyroid
AKAP13	15	85923871	86292586	0.055	-1.10071	0.271	Thyroid
CCDC113	16	58283840	58317732	0.099	1.1013	0.271	Thyroid
MXD3	5	176732501	176739292	0.044	1.10168	0.271	Thyroid
MED19	11	57471182	57479673	0.091	1.09999	0.27134	Thyroid
CDKAL1	6	20534688	21232632	0.016	-1.09972	0.271456	Thyroid
FAM43B	1	20878932	20881512	0.047	1.09853	0.272	Thyroid
RHOQ	2	46769867	46811825	0.044	1.09931	0.272	Thyroid
PUF60	8	144898549	144911537	0.075	1.0991	0.272	Thyroid
SNPH	20	1246960	1289969	0.025	-1.09672	0.27276	Thyroid
STK35	20	2082528	2129196	0.041	-1.09624	0.27297	Thyroid
ANXA9	1	150954499	150968114	0.054	-1.09604	0.273	Thyroid
CWC22	2	180809604	180871840	0.028	1.09687	0.273	Thyroid
GGNBP2	17	34900804	34946274	0.049	1.0954	0.273341	Thyroid
SEC61G	7	54819941	54826939	0.069	1.09461	0.27369	Thyroid
C7orf44	7	43648086	43769083	0.21	-1.09437	0.27379	Thyroid
ACSM1	16	20634559	20709066	0.36	-1.095	0.274	Thyroid
CNN2	19	1026298	1039063	0.066	1.09467	0.274	Thyroid
LRFN4	11	66624589	66627945	0.044	1.09332	0.27425	Thyroid
KLRC2	12	10579193	10588592	0.055	1.09286	0.27446	Thyroid
WDR19	4	39184024	39287429	0.011	-1.09281	0.27448	Thyroid
LGR6	1	202163118	202288888	0.016	-1.09189	0.275	Thyroid
PDZD8	10	119042606	119134937	0.068	-1.09053	0.275	Thyroid
TMED8	14	77801366	77843396	0.041	-1.0911	0.275	Thyroid
HERPUD1	16	56965748	56977793	0.046	-1.0926	0.275	Thyroid
GRHL1	2	10091792	10142411	0.067	1.09119	0.275	Thyroid
ST3GAL6	3	98451152	98513234	0.06	1.0912	0.275	Thyroid
ZNF346	5	176449697	176508190	0.055	1.09076	0.275	Thyroid
TRAP1	16	3708039	3767598	0.034	1.0899	0.276	Thyroid
SLC37A4	11	118895061	118901616	0.056	-1.08852	0.27637	Thyroid
PTPRF	1	43996547	44089342	0.039	-1.08687	0.277	Thyroid
LDB3	10	88426551	88495822	0.097	1.08799	0.277	Thyroid
SLIT1	10	98757795	98945683	0.093	1.08649	0.277	Thyroid
FAM103A1	15	83654995	83659423	0.053	-1.0866	0.277	Thyroid
GGT1	22	24979718	25024972	0.18	-1.08688	0.27709	Thyroid
CECR1	22	17660192	17702738	0.091	1.08678	0.27714	Thyroid
RGS5	1	163112098	163172872	0.061	-1.08521	0.278	Thyroid
EPHX1	1	225997797	226033260	0.092	1.0845	0.278	Thyroid
PKIG	20	43160436	43247677	0.047	-1.08339	0.27863	Thyroid
BIN3	8	22477949	22526661	0.046	1.08365	0.279	Thyroid
OR7D2	19	9296270	9299493	0.011	-1.08029	0.28	Thyroid
TIGD1	2	233412779	233415226	0.028	-1.0813	0.28	Thyroid
TMEM232	5	109624934	110062381	0.24	-1.07972	0.28	Thyroid
C1orf66	1	156698263	156706751	0.03	-1.07898	0.281	Thyroid
PYROXD2	10	100143323	100174978	0.72	1.07798	0.281	Thyroid
MBD6	12	57916659	57923931	0.0046	1.07712	0.28143	Thyroid
CRYBB3	22	25595825	25603324	0.12	-1.07706	0.28145	Thyroid
IL23A	12	56732663	56734193	0.028	1.07685	0.28155	Thyroid
CCDC73	11	32623627	32816187	0.2	-1.07611	0.28188	Thyroid
CPD	17	28705984	28795699	0.028	1.07594	0.281955	Thyroid
KLF9	9	72999515	73029573	0.016	-1.07661	0.282	Thyroid
RNF40	16	30773630	30786536	0.056	1.0731	0.283	Thyroid
HAS1	19	52216365	52227221	0.053	-1.07372	0.283	Thyroid
LHFPL2	5	77781040	77944648	0.059	1.07333	0.283	Thyroid
LYNX1	8	143845758	143859640	0.24	1.07284	0.283	Thyroid
DTX2	7	76090972	76135311	0.041	-1.07281	0.28336	Thyroid
CDK17	12	96672040	96794223	0.037	-1.07264	0.28343	Thyroid
CDK5RAP3	17	46047900	46059146	0.059	-1.07247	0.28351	Thyroid
MDP1	14	24681945	24685241	0.018	-1.07189	0.284	Thyroid
JAKMIP2	5	146970706	147162252	0.047	-1.07157	0.284	Thyroid
MAL2	8	120220610	120257911	0.04	1.07065	0.284	Thyroid
KIAA0562	1	3728645	3773797	0.3	1.06842	0.285	Thyroid
FAM81A	15	59730372	59815751	0.083	-1.06929	0.285	Thyroid
SCAPER	15	76640529	77197744	0.018	1.06902	0.285	Thyroid
LRRK1	15	101459460	101610315	0.056	-1.06984	0.285	Thyroid
CSNK2A2	16	58191816	58231782	0.034	-1.0688	0.285	Thyroid
QSER1	11	32914792	33014862	0.052	1.06744	0.28577	Thyroid
NACA	12	57106211	57119326	0.028	1.06744	0.28577	Thyroid
TMEM45A	3	100211463	100296285	0.1	1.067	0.286	Thyroid
TMEM129	4	1717680	1723084	0.24	-1.06645	0.28622	Thyroid
TP53I13	17	27895739	27900174	0.1	1.06591	0.286465	Thyroid
SPATA20	17	48620419	48633211	0.38	-1.06486	0.286941	Thyroid
C19orf40	19	33463148	33467955	0.13	1.06548	0.287	Thyroid
ATP6V1B1	2	71162998	71192560	0.025	-1.06449	0.287	Thyroid
XPC	3	14186650	14220172	0.01	1.0648	0.287	Thyroid
GTF2H1	11	18343816	18388590	0.14	-1.06467	0.28702	Thyroid
DNTTIP1	20	44420576	44440064	0.11	1.06404	0.28731	Thyroid
CSRP2BP	20	18118527	18169015	0.11	1.06392	0.28736	Thyroid
CHRNB1	17	7348406	7360931	0.046	-1.06367	0.28748	Thyroid
MTHFR	1	11845787	11866115	0.036	-1.06334	0.288	Thyroid
LRIG2	1	113615831	113667342	0.38	1.0635	0.288	Thyroid
BRF1	14	105675623	105781914	0.071	1.06284	0.288	Thyroid
SMPD3	16	68392232	68482409	0.028	1.0621	0.288	Thyroid
ELP2P	17	655900	658576	0.32	1.06222	0.288137	Thyroid
ZG16B	16	2880173	2882284	0.16	1.0595	0.289	Thyroid
ADAT1	16	75632998	75657154	0.14	-1.0606	0.289	Thyroid
C3orf19	3	14693253	14714164	0.046	1.0599	0.289	Thyroid
PLCH1	3	155197671	155421997	0.11	-1.0605	0.289	Thyroid
MED30	8	118532965	118552499	0.049	-1.06059	0.289	Thyroid
COL15A1	9	101706138	101833068	0.034	1.06028	0.289	Thyroid
SHBG	17	7517382	7536700	0.02	1.05954	0.289355	Thyroid
RAB40B	17	80614944	80656598	0.24	-1.05943	0.289404	Thyroid
TOM1L1	17	52978052	53039328	0.038	1.05917	0.289521	Thyroid
BTN2A3	6	26422317	26431927	0.14	1.05832	0.289911	Thyroid
ZNF772	19	57980955	57988938	0.062	-1.05825	0.29	Thyroid
C2orf74	2	61372243	61391964	0.73	-1.05779	0.29	Thyroid
TXN	9	113006310	113018833	0.056	1.0576	0.29	Thyroid
STX18	4	4420698	4543775	0.061	-1.05712	0.29046	Thyroid
EEF1E1	6	8073595	8102828	0.035	1.05709	0.290472	Thyroid
KNDC1	10	134973971	135039916	0.041	1.05566	0.291	Thyroid
RAB4B	19	41281657	41302847	0.065	-1.05516	0.291	Thyroid
C9orf4	9	111899581	111929571	0.064	-1.05626	0.291	Thyroid
C11orf35	11	554858	560779	0.026	1.05555	0.29117	Thyroid
FAM200B	4	15683352	15692062	0.028	1.05499	0.29143	Thyroid
SH2D4B	10	82297658	82406316	0.064	1.0545	0.292	Thyroid
LPPR2	19	11466107	11476372	0.2	1.05269	0.292	Thyroid
C19orf47	19	40826973	40854422	0.15	1.05388	0.292	Thyroid
ZNF470	19	57078890	57100276	0.015	1.05438	0.292	Thyroid
CAPG	2	85621871	85641170	0.14	-1.0532	0.292	Thyroid
TMEM110	3	52867139	52931547	0.016	1.0548	0.292	Thyroid
FLJ36777	4	7099151	7105103	0.098	1.05344	0.29214	Thyroid
PPFIBP2	11	7535001	7678358	0.1	-1.05225	0.29269	Thyroid
ADCK2	7	140372953	140395744	0.035	-1.0517	0.29294	Thyroid
C10orf46	10	120433634	120514758	0.1	-1.05065	0.293	Thyroid
KCNJ14	19	48958766	48969367	0.012	1.05188	0.293	Thyroid
ADI1	2	3501691	3523350	0.13	-1.04949	0.294	Thyroid
C2orf84	2	24397531	24414566	0.13	1.04868	0.294	Thyroid
GPR55	2	231772034	231825691	0.024	-1.04858	0.294	Thyroid
KBTBD12	3	127634318	127706513	0.072	-1.0501	0.294	Thyroid
IMPA1	8	82569151	82598589	0.14	-1.0488	0.294	Thyroid
ZNF707	8	144766622	144794977	0.031	1.05008	0.294	Thyroid
NUP54	4	77035818	77069655	0.043	-1.04848	0.29442	Thyroid
CCDC82	11	96085930	96123083	0.3	-1.04806	0.29461	Thyroid
ZNF319	16	58028573	58033762	0.2	1.0464	0.295	Thyroid
ZNF304	19	57862645	57871263	0.035	1.04759	0.295	Thyroid
PDLIM5	4	95373038	95589376	0.042	-1.04667	0.29525	Thyroid
NEK8	17	27055832	27069782	0.031	1.04657	0.295299	Thyroid
C1QL4	12	49726200	49730971	0.14	-1.04634	0.29541	Thyroid
IKBIP	12	99007183	99038589	0.18	1.04581	0.29565	Thyroid
ROBO3	11	124735282	124751361	0.14	-1.04527	0.2959	Thyroid
TMX3	18	66340927	66382353	0.054	-1.0461	0.296	Thyroid
TMEM169	2	216946589	216967505	0.041	1.04468	0.296	Thyroid
HLA-DQA2	6	32709163	32715219	0.15	1.0446	0.296208	Thyroid
MRPS10	6	42174540	42185633	0.34	1.04405	0.296462	Thyroid
POM121C	7	75046066	75115568	0.072	-1.04366	0.29664	Thyroid
NOS2	17	26083793	26220409	0.15	1.0415	0.297644	Thyroid
ZNF496	1	247463623	247495162	0.046	-1.04138	0.298	Thyroid
PKHD1L1	8	110374706	110543499	0.12	1.03983	0.298	Thyroid
CWF19L2	11	107197074	107328572	0.066	1.03969	0.29849	Thyroid
C22orf32	22	42475699	42480287	0.37	1.03879	0.2989	Thyroid
DNAJC16	1	15853352	15918872	0.069	-1.03773	0.299	Thyroid
TAF13	1	109606998	109618624	0.033	1.03904	0.299	Thyroid
CHI3L2	1	111770281	111786060	0.093	1.03959	0.299	Thyroid
RANBP3L	5	36249105	36302011	0.043	1.03853	0.299	Thyroid
LOC389705	9	14993325	15019722	0.16	-1.03852	0.299	Thyroid
SAP18	13	21714653	21723223	0.032	-1.0385	0.299034	Thyroid
C20orf26	20	20033196	20341349	0.038	-1.0382	0.29917	Thyroid
C12orf66	12	64586420	64616076	0.026	1.03764	0.29944	Thyroid
ATXN7L3B	12	74931551	74935223	0.034	1.0376	0.29946	Thyroid
SNCG	10	88718288	88723017	0.14	-1.03614	0.3	Thyroid
TRIM69	15	45021219	45060025	0.12	-1.03701	0.3	Thyroid
GOLT1B	12	21654699	21671337	0.057	1.03455	0.30088	Thyroid
CLEC10A	17	6977857	6983600	0.061	-1.03443	0.300937	Thyroid
C16orf57	16	58035305	58055521	0.14	1.0334	0.301	Thyroid
WDR36	5	110427870	110466201	0.049	1.03453	0.301	Thyroid
CHST1	11	45670427	45687172	0.047	-1.03262	0.30178	Thyroid
STBD1	4	77172853	77232282	0.021	-1.03229	0.30194	Thyroid
COX7A1	19	36641824	36643771	0.022	1.0328	0.302	Thyroid
GNLY	2	85921414	85925874	0.25	1.03136	0.302	Thyroid
FZD7	2	202899310	202903160	0.017	-1.03316	0.302	Thyroid
KRTAP5-2	11	1618409	1619524	0.2	-1.03118	0.30245	Thyroid
GNRHR	4	68603106	68621804	0.12	-1.03098	0.30255	Thyroid
DCT	13	95091843	95131936	0.066	1.0308	0.302655	Thyroid
ALDH2	12	112204346	112247782	0.023	-1.03068	0.30269	Thyroid
HSD17B11	4	88257691	88312455	0.15	-1.03062	0.30272	Thyroid
CBWD1	9	121039	179075	0.21	-1.03019	0.303	Thyroid
WDR25	14	100842755	100996638	0.087	1.02852	0.304	Thyroid
TEPP	16	58010339	58022015	0.22	1.0279	0.304	Thyroid
SKA1	18	47901392	47920534	0.016	-1.0286	0.304	Thyroid
BNIP1	5	172571445	172591389	0.26	1.02744	0.304	Thyroid
SAMD12	8	119201695	119634234	0.1	1.02847	0.304	Thyroid
NEAT1	11	65190245	65207625	0.23	-1.02751	0.30418	Thyroid
TUBD1	17	57936851	57970296	0.022	-1.02664	0.304591	Thyroid
C1QL3	10	16555742	16564004	0.45	-1.02631	0.305	Thyroid
SPIRE2	16	89894907	89937727	0.075	1.0253	0.305	Thyroid
PLEC	8	144989321	145050913	0.13	-1.02539	0.305	Thyroid
DUSP18	22	31048039	31063872	0.057	-1.02564	0.30506	Thyroid
RNFT1	17	58029724	58042117	0.037	-1.02411	0.305782	Thyroid
TMC5	16	19421861	19510432	0.21	1.0247	0.306	Thyroid
ZNF491	19	11909391	11919306	0.048	1.02315	0.306	Thyroid
PLCD1	3	38048989	38071154	0.092	1.0236	0.306	Thyroid
DZIP1L	3	137780834	137834451	0.044	1.0233	0.306	Thyroid
BHMT2	5	78365583	78385273	0.044	-1.02425	0.306	Thyroid
AKAP12	6	151561134	151679692	0.042	-1.02278	0.30641	Thyroid
PRPSAP1	17	74306868	74350279	0.034	1.02234	0.306622	Thyroid
DLST	14	75348594	75370450	0.033	-1.02213	0.307	Thyroid
C14orf1	14	76117237	76127532	0.067	-1.02226	0.307	Thyroid
VCPIP1	8	67542490	67579452	0.0034	1.02224	0.307	Thyroid
GSTT2	22	24322314	24326104	0.73	-1.02098	0.30726	Thyroid
RHBDD3	22	29655844	29663914	0.015	-1.0207	0.30739	Thyroid
RBL1	20	35625072	35724410	0.015	1.02053	0.30748	Thyroid
AKR1B1	7	134127107	134143888	0.072	1.01985	0.3078	Thyroid
NINL	20	25433338	25566153	0.14	1.01971	0.30787	Thyroid
FLG	1	152274651	152297679	0.12	-1.01974	0.308	Thyroid
WWP2	16	69796274	69975643	0.0098	1.0202	0.308	Thyroid
SFRS12IP1	5	64013980	64064496	0.04	1.01722	0.309	Thyroid
MORN1	1	2252696	2322993	0.17	-1.01594	0.31	Thyroid
AMTN	4	71384298	71398459	0.038	-1.01496	0.31012	Thyroid
SCGN	6	25652429	25702006	0.065	-1.01411	0.310532	Thyroid
ITM2C	2	231729621	231743962	0.032	-1.01241	0.311	Thyroid
WDR66	12	122356480	122441830	0.031	1.01108	0.31198	Thyroid
C11orf67	11	77532197	77629462	0.12	1.01092	0.31205	Thyroid
C6orf129	6	37450699	37467700	0.14	1.00952	0.312727	Thyroid
HAUS1	18	43684298	43708298	0.11	1.0092	0.313	Thyroid
LGALS2	22	37966254	37976024	0.26	1.00793	0.31349	Thyroid
PLEKHM1	17	43513267	43568146	0.04	-1.00718	0.313846	Thyroid
TMEM37	2	120189446	120196094	0.056	1.00728	0.314	Thyroid
CNTN4	3	2140550	3099644	0.14	-1.0073	0.314	Thyroid
KIAA1407	3	113682986	113775460	0.058	-1.006	0.314	Thyroid
FAM86B1	8	12039614	12051624	0.041	1.00776	0.314	Thyroid
MBOAT4	8	29989188	30002200	0.05	1.00621	0.314	Thyroid
ZMYND15	17	4643319	4649410	0.017	1.00675	0.314056	Thyroid
ZNF584	19	58920063	58929690	0.14	1.00477	0.315	Thyroid
TINAGL1	1	32013118	32053285	0.03	1.00186	0.316	Thyroid
MFSD2A	1	40420784	40435627	0.062	-1.00232	0.316	Thyroid
GOLPH3L	1	150618701	150669672	0.016	-1.00249	0.316	Thyroid
NUDT5	10	12209574	12238143	0.046	1.00181	0.316	Thyroid
ANKRD9	14	102973198	102976128	0.038	1.00179	0.316	Thyroid
HIF3A	19	46800305	46846689	0.02	-1.00198	0.316	Thyroid
DLG1	3	196769432	197026143	0.052	1.0021	0.316	Thyroid
LPIN3	20	39969560	39989221	0.039	-1.00213	0.31628	Thyroid
BDH2	4	103998783	104021024	0.26	-1.00176	0.31646	Thyroid
LOC678655	12	6548167	6560683	0.018	1.00151	0.31658	Thyroid
ZNF12	7	6728064	6746566	0.046	1.00102	0.31682	Thyroid
MRPL18	6	160211022	160219460	0.21	1.00093	0.316863	Thyroid
AKR1C2	10	4964715	5060207	0.078	1.00083	0.317	Thyroid
IL15RA	10	5990859	6020142	0.036	-0.999828	0.317	Thyroid
KIAA0556	16	27561468	27791691	0.035	1.0012	0.317	Thyroid
SP140L	2	231191894	231268445	0.016	-1.00041	0.317	Thyroid
PISD	22	32014477	32058201	0.049	-1.0002	0.31722	Thyroid
SIDT2	11	117049939	117068161	0.019	0.99819	0.31819	Thyroid
ANKRD50	4	125585468	125633887	0.024	-0.99817	0.3182	Thyroid
C6orf167	6	97590038	97731061	0.059	-0.997936	0.31831	Thyroid
ITFG2	12	2921863	2939770	0.042	0.99776	0.3184	Thyroid
MAP6	11	75297964	75379479	0.03	0.997662	0.31844	Thyroid
COL21A1	6	55921389	56258892	0.4	-0.99665	0.318934	Thyroid
EPN3	17	48610048	48621110	0.24	-0.99464	0.319911	Thyroid
TOX4	14	21945335	21967317	0.085	0.99444	0.32	Thyroid
C14orf33	14	56024690	56046810	0.034	0.99518	0.32	Thyroid
ZNF665	19	53666552	53696619	0.066	0.99541	0.32	Thyroid
SVIP	11	22843600	22851382	0.051	0.994384	0.32004	Thyroid
GLT1D1	12	129338081	129469509	0.033	-0.9937	0.32037	Thyroid
SYPL2	1	110009100	110024763	0.036	-0.99342	0.321	Thyroid
ATXN7L2	1	110026561	110035418	0.057	-0.99342	0.321	Thyroid
C10orf4	10	95428329	95462913	0.17	-0.991827	0.321	Thyroid
FES	15	91427665	91439004	0.32	0.99245	0.321	Thyroid
CYB5A	18	71920528	71959221	0.069	0.9932	0.321	Thyroid
STX17	9	102668915	102736817	0.047	-0.9929	0.321	Thyroid
PSMA7	20	60711791	60718474	0.036	0.99237	0.32102	Thyroid
DDX52	17	35972413	36003487	0.046	0.99143	0.321478	Thyroid
HLA-DQB1	6	32627657	32634466	0.12	0.99119	0.321595	Thyroid
PACRG	6	163148164	163736523	0.095	0.990574	0.321894	Thyroid
MRPL9	1	151732125	151736040	0.048	-0.99118	0.322	Thyroid
RASGRF1	15	79252291	79383215	0.018	-0.99083	0.322	Thyroid
MESDC2	15	81239670	81282205	0.085	0.98935	0.322	Thyroid
C12orf72	12	31800094	31822014	0.065	-0.98938	0.32247	Thyroid
ACSF2	17	48503519	48552200	0.019	-0.98913	0.322598	Thyroid
ABCG4	11	119019750	119033372	0.1	0.988474	0.32292	Thyroid
C18orf16	18	24445272	24770650	0.052	-0.9891	0.323	Thyroid
CETN4P	4	123651344	123653613	0.11	-0.98671	0.32378	Thyroid
DRAM2	1	111659955	111682838	0.15	0.98653	0.324	Thyroid
[truncated: 3,213 more rows]
