# Supplementary material for: Large-scale association analysis identified novel differentiated thyroid carcinoma risk loci by integrating transcriptome and proteome
Source: Research Square preprint supplement (doi:10.21203/rs.3.rs-6751995/v1), 2025-07-18
Supplement: Supplementary file 7 [file a46f25a3289304042c3bcbc4.xlsx]

## Sheet: Contents
	Contents
	Supplementary Table 1	Genome-wide association study analysis result that are identified across all studies
	Supplementary Table 2	Transcriptome-wide association study results using thyroid-relevant tissues from GTEx including thyroid, whole blood, pituatary, and brain hypothalamus
	Supplementary Table 3	Result of Baysian colocalization analysis of transcriptome (eQTLs) with differentiated thyroid carcinoma (DTC)
	Supplementary Table 4	FOCUS fine mapping analysis results of DTC identified genes across 49 tissues
	Supplementary Table 5	Results of transcriptome-wide association study (TWAS) using all 49 available tissues from GTEx
	Supplementary Table 6	Results of transcriptome-wide association study (TWAS) using thyroid cancer tissue from TCGA databse
	Supplementary Table 7	Results of brain and plasma blood proteome-wide association study (PWAS) using ROSMAP and AIRC study
	Supplementary Table 8	Result of Baysian colocalization analysis of proteome (pQTL) with differentiated thyroid carcinoma (DTC)
	Supplementary Table 9	Gene Set Enrichment Analysis of pathways and biological processes associated with identified genes from GWAS, TWAS and PWAS
	Supplementary Table 10	Effect estimates used in the PRS model in the study group EPIC and EPITYHR
	Supplementary Table 11	Comparison of MR casual estimates between MVMR and IVW (different clumping thresholds)

## Sheet: S1
Supplementary Table 1. Genome-wide association study analysis result that are identified across all studies
SNP: Single nucleotide polymorphism; EA: Effect allele; OA: Other allele; EAF: Effect allele frequency; OR: Odds ratio; SE: Standard error
Chromosome and position with reference to build 38
Locus	# of SNPs +/- 500kb within locus	SNP	Nearest gene	Chromosome	position	EA	OA	EAF	OR	SE	P	Study	Imputation score
1p31.3	61	rs334723	NFIA	1	61166357	G	A	0.0567	1.21951	0.0661508	0.0027	deCODE genetics	N/A
		Phet= 0.12; I2= 41%						0.0494573	1.69129	0.115436	5.30774e-06	EPITHYR	0.974
								0.0479678	1.86733	0.199797	0.00177365	EPIC	0.974
								0.0483662	1.3878	0.126066	0.00933294	UKBB	N/A
								0.0550847	1.69726	0.249783	0.0341841	Italian	N/A
								0.021469	1.24414	0.120803	0.07057	Finngen	N/A
								0.042124	1.35461	0.045831	3.66e-11	Meta-analysis	-
1q41	47	rs1342586	TGFB2	1	218424517	C	T	0.7985	1.19048	0.0409859	2.1e-05	deCODE genetics	N/A
		Phet= 0.83; I2= 0%						0.783657	1.21669	0.0607572	0.001246	EPITHYR	1.000
								0.806013	1.13654	0.115832	0.269194	EPIC	1.000
								0.784313	1.3712	0.0834599	0.000155281	UKBB	N/A
								0.789077	1.27701	0.141495	0.0839639	Italian	N/A
								0.753138	1.20403	0.041571	8.06e-06	Finngen	N/A
								0.77845	1.21349	0.024162	1.22e-15	Meta-analysis	-
1q42.2	30	rs6697791	PCNX2	1	233276132	C	T	0.7998	1.2987	0.0400826	7e-11	deCODE genetics	N/A
		Phet= 0.07; I2= 49%						0.809184	1.24198	0.0629065	0.000571162	EPITHYR	1.000
								0.792834	1.44532	0.115728	0.00145902	EPIC	1.000
								0.786097	1.00702	0.0760342	0.926706	UKBB	N/A
								0.818738	1.28225	0.145694	0.0879268	Italian	N/A
								0.804149	1.1767	0.045503	0.000351	Finngen	N/A
								0.796193	1.22576	0.024597	1.34e-16	Meta-analysis	-
1q43	82	rs2451668	SDCCAG8	1	243322950	T	C	0.473	1.16279	0.0333208	6e-06	deCODE genetics	N/A
		Phet= 0.82; I2= 0%						0.477828	1.08416	0.0496535	0.103638	EPITHYR	0.995
								0.478771	1.15772	0.0891086	0.100273	EPIC	0.995
								0.449876	1.15768	0.0622718	0.0187102	UKBB	N/A
								0.495292	1.29438	0.113036	0.0224474	Italian	N/A
								0.428501	1.17586	0.035051	3.86e-06	Finngen	N/A
								0.45003	1.15713	0.019679	1.26e-13	Meta-analysis	-
2q35	480	rs57481445	DIRC3	2	217431651	G	A	0.2936	1.43	0.0346514	5.6e-25	deCODE genetics	N/A
		Phet= 0.91; I2= 0%						0.280947	1.41208	0.0545496	2.52158e-10	EPITHYR	1.000
								0.275536	1.36511	0.0968569	0.00131206	EPIC	1.000
								0.263263	1.43662	0.0657851	3.64598e-08	UKBB	N/A
								0.313559	1.50409	0.125518	0.00114592	Italian	N/A
								0.305101	1.34644	0.03632	2.74e-16	Finngen	N/A
								0.286076	1.39928	0.020725	4.8e-59	Meta-analysis	-
3q26.2	75	rs9868000	LRRC34	3	169793001	G	A	0.7588	1.23457	0.0374269	1.8e-08	deCODE genetics	N/A
		Phet= 0.70; I2= 0%						0.753423	1.09636	0.0576251	0.110388	EPITHYR	1.000
								0.733526	1.14352	0.104604	0.1998	EPIC	1.000
								0.73591	1.14282	0.073003	0.0674435	UKBB	N/A
								0.719868	1.1879	0.125627	0.170498	Italian	N/A
								0.710523	1.14353	0.039301	0.000647	Finngen	N/A
								0.734545	1.16908	0.022334	2.76e-12	Meta-analysis	-
5p15.33	18	rs7734992	TERT	5	1280013	C	T	0.4396	1.15	0.0334882	3e-05	deCODE genetics	N/A
		Phet= 0.96; I2= 0%						0.414005	1.20659	0.0495064	0.000148601	EPITHYR	1.000
								0.439044	1.21537	0.0921198	0.0342282	EPIC	1.000
								0.41788	1.13992	0.0635166	0.0392267	UKBB	N/A
								0.435499	1.16328	0.113867	0.18409	Italian	N/A
								0.465167	1.19954	0.034676	1.58e-07	Finngen	N/A
								0.439784	1.17707	0.01971	1.39e-16	Meta-analysis	-
5q22.1	82	rs73227498	EPB41L4A	5	112150207	A	T	0.8724	1.36986	0.0499638	3e-10	deCODE genetics	N/A
		Phet= 0.80; I2= 0%						0.878166	1.3349	0.0782924	0.000224703	EPITHYR	0.991
								0.865719	1.23817	0.136052	0.116358	EPIC	0.988
								0.860144	1.47495	0.103989	0.00018611	UKBB	N/A
								0.906309	1.19622	0.195088	0.358407	Italian	N/A
								0.862948	1.25366	0.053602	2.5e-05	Finngen	N/A
								0.864844	1.32361	0.030365	2.8e-20	Meta-analysis	-
5q31.1	1	rs56110108	JADE2	5	134557286	T	A	0.873967	1.43544	0.0754721	1.67249e-06	EPITHYR	0.987
		Phet= 0.37; I2=7%						0.866775	1.08427	0.135356	0.550026	EPIC	0.987
								0.873827	1.33503	0.104912	0.00588221	UKBB	N/A
								0.941236	1.22031	0.074967	0.007926	Finngen	N/A
								0.905137	1.2965	0.044769	6.8e-09	Meta-analysis	-
6p21.1	22	rs1326141	POLR1C	6	43935540	A	G	0.2391	1.19	0.0373487	3.2e-06	deCODE genetics	N/A
		Phet= 0.66; I2= 0%						0.216222	1.10804	0.0610775	0.0930167	EPITHYR	0.965
								0.203729	1.35989	0.106635	0.00394194	EPIC	0.965
								0.229714	1.12181	0.0720474	0.110617	UKBB	N/A
								0.20951	1.33656	0.140795	0.039358	Italian	N/A
								0.23871	1.18052	0.039885	3.21e-05	Finngen	N/A
								0.235343	1.17908	0.022677	3.91e-13	Meta-analysis	-
7q31.33	6	rs2299903	GPR37	7	124757288	G	A	0.3751	1.14	0.0332188	8e-05	deCODE genetics	N/A
		Phet= 0.95; I2= 0%						0.383655	1.07293	0.0522684	0.178082	EPITHYR	1.000
								0.392031	1.16193	0.0927781	0.105745	EPIC	1.000
								0.366148	1.09215	0.0639279	0.167935	UKBB	N/A
								0.388418	1.04365	0.116051	0.712764	Italian	N/A
								0.411704	1.12065	0.035276	0.001248	Finngen	N/A
								0.383758	1.11717	0.019956	2.89e-08	Meta-analysis	-
8p12	344	rs4733128	NRG1	8	32549084	T	C	0.4798	1.31	0.0320111	3.3e-17	deCODE genetics	N/A
		Phet= 0.49; I2= 0%						0.480319	1.25232	0.0498818	6.46429e-06	EPITHYR	1.000
								0.465514	1.09545	0.0891375	0.306441	EPIC	1.000
								0.455308	1.32069	0.0622607	7.90981e-06	UKBB	N/A
								0.450094	1.1371	0.116983	0.272063	Italian	N/A
								0.550418	1.30998	0.035262	1.98e-14	Finngen	N/A
								0.493657	1.28597	0.019466	3.8e-38	Meta-analysis	-
8q24.22	4	rs79676842	TG	8	132871660	T	G	0.023	1.2	0.110844	0.1	deCODE genetics	N/A
		Phet= 0.22; I2= 29%						0.0195379	1.99496	0.177329	9.83675e-05	EPITHYR	1.000
								0.0168863	1.05556	0.348895	0.876835	EPIC	1.000
								0.0273905	1.5341	0.15609	0.00611296	UKBB	N/A
								0.023361	1.45093	0.102842	0.000298	Finngen	N/A
								0.024723	1.41935	0.062378	2.02e-08	Meta-analysis	-
9p22.1	47	rs13287517	HAUS6	9	19064131	C	G	0.4092	1.12	0.0332357	0.00065	deCODE genetics	N/A
		Phet= 0.84; I2= 0%						0.405138	1.14785	0.0505226	0.00634618	EPITHYR	0.999
								0.387141	1.1851	0.0930135	0.0678704	EPIC	0.999
								0.388385	1.06272	0.0634708	0.337834	UKBB	N/A
								0.544256	0.914523	0.118196	0.44967	Italian	N/A
								0.341174	1.18118	0.036296	4.55e-06	Finngen	N/A
								0.379393	1.13894	0.020034	8.65e-11	Meta-analysis	-
9q22.33	575	rs7847663	PTCSC2	9	97782586	C	T	0.3965	1.69492	0.0328008	3.2e-58	deCODE genetics	N/A
		Phet= 0.43; I2= 0%						0.387462	1.60349	0.0505056	8.83502e-21	EPITHYR	0.999
								0.375421	1.4485	0.0928041	6.53576e-05	EPIC	0.999
								0.332536	1.80922	0.0623715	1.98315e-21	UKBB	N/A
								0.406309	1.52707	0.118896	0.000369842	Italian	N/A
								0.346258	1.61567	0.034311	2.21e-44	Finngen	N/A
								0.356464	1.64935	0.019556	2.47e-144	Meta-analysis	-
10q22.3	146	rs1650149	DLG5	10	77924587	A	G	0.7161	1.16279	0.0357841	2.5e-05	deCODE genetics	N/A
		Phet= 0.56; I2= 0%						0.736859	1.10849	0.0576261	0.0738885	EPITHYR	0.986
								0.765954	1.25048	0.107781	0.0380884	EPIC	0.986
								0.710471	1.18153	0.0714475	0.0195577	UKBB	N/A
								0.79661	1.46663	0.143733	0.00771178	Italian	N/A
								0.697427	1.1127	0.038438	0.00548	Finngen	N/A
								0.708172	1.14974	0.021878	1.85e-10	Meta-analysis	-
10q24.33	33	rs9419958	STN1	10	103916188	T	C	0.1486	1.33333	0.0449818	1.6e-10	deCODE genetics	N/A
		Phet= 0.37; I2= 7%						0.175073	1.23004	0.0655336	0.00158072	EPITHYR	0.994
								0.164262	1.12856	0.119818	0.312788	EPIC	0.993
								0.129498	1.09675	0.0897848	0.303657	UKBB	N/A
								0.228343	1.41297	0.144657	0.0168594	Italian	N/A
								0.114948	1.1916	0.052647	0.000874	Finngen	N/A
								0.130797	1.24381	0.027427	1.88e-15	Meta-analysis	-
12q14.3	4	rs12318900	PCNPP3	12	65650504	A	G	0.031	1.42	0.0924955	0.00015	deCODE genetics	N/A
		Phet= 0.76; I2= 0%						0.0360769	1.35778	0.132873	0.0213449	EPITHYR	0.989
								0.0330457	1.8553	0.235172	0.00858696	EPIC	0.989
								0.0223806	1.16821	0.195539	0.426559	UKBB	N/A
								0.037124	1.32406	0.086454	0.001173	Finngen	N/A
								0.029824	1.3717	0.053334	3.19e-09	Meta-analysis	-
14q13.3	499	rs56400346	PTCSC3	14	36114681	A	G	0.6052	1.38	0.0332762	3.7e-22	deCODE genetics	N/A
		Phet= 0.22; I2= 29%						0.605961	1.39094	0.0518444	1.95528e-10	EPITHYR	1.000
								0.600906	1.30685	0.0903897	0.00306868	EPIC	1.000
								0.585071	1.31807	0.0652144	2.28826e-05	UKBB	N/A
								0.62858	1.2243	0.036738	3.71e-08	Finngen	N/A
								0.605357	1.32127	0.020526	6.37e-42	Meta-analysis	-
15q15.1	15	rs62019923	RAD51	15	40672837	T	C	0.8517	1.16	0.0451052	0.001	deCODE genetics	N/A
		Phet= 0.78; I2= 0%						0.850073	1.24534	0.0695446	0.0016052	EPITHYR	0.991
								0.849611	0.952073	0.12521	0.694871	EPIC	0.991
								0.84531	1.16977	0.0916056	0.0869426	UKBB	N/A
								0.831344	1.17315	0.048266	0.000943	Finngen	N/A
								0.8427	1.16703	0.027624	2.31e-08	Meta-analysis	-
15q22.33	39	rs17293632	SMAD3	15	67150258	T	C	0.2525	1.24	0.0367678	4.9e-09	deCODE genetics	N/A
		Phet= 0.87; I2= 0%						0.238438	1.14431	0.0583422	0.0208591	EPITHYR	0.991
								0.243523	1.15447	0.106388	0.176962	EPIC	0.992
								0.236777	1.24906	0.0693801	0.00134871	UKBB	N/A
								0.23258	1.15127	0.135702	0.299234	Italian	N/A
								0.262394	1.25558	0.038317	2.93e-09	Finngen	N/A
								0.24982	1.22572	0.022006	2.41e-20	Meta-analysis	-
16q22.2	1	rs59831429	ZFHX3-AS1	16	72721676	T	C	0.9518	1.26582	0.0700854	0.00077	deCODE genetics	N/A
		Phet= 0.72; I2= 0%						0.946964	1.24811	0.112424	0.0486795	EPITHYR	0.975
								0.948297	0.93232	0.204322	0.73161	EPIC	0.975
								0.94754	1.1641	0.149689	0.310057	UKBB	N/A
								0.913779	1.31535	0.066724	4.03e-05	Finngen	N/A
								0.937825	1.25803	0.04167	3.7e-08	Meta-analysis	-
16q23.2	85	rs11645076	MAFTRR	16	79678658	T	C	0.3386	1.15	0.0337734	3.5e-05	deCODE genetics	N/A
		Phet<0.01; I2= 72%						0.343684	1.24707	0.0526554	2.75053e-05	EPITHYR	0.997
								0.349547	1.31311	0.0948354	0.00407413	EPIC	0.997
								0.331701	1.05823	0.065412	0.386876	UKBB	N/A
								0.346987	1.57027	0.127109	0.000385121	Italian	N/A
								0.334881	1.18106	0.024662	1.56e-11	Meta-analysis	-
18p11.32	1	rs143705522	YES1	18	799487	A	C	0.9907	2.04082	0.221814	0.0013	deCODE genetics	N/A
		Phet=1.00; I2= 0%						0.988046	2.06152	0.414866	0.0811944	UKBB	N/A
								0.983979	1.98199	0.167287	4.37e-05	Finngen	N/A
								0.987514	2.00853	0.127135	4.22e-08	Meta-analysis	-
19p13.2	16	rs4804416	INSR	19	7223837	T	G	0.5844	1.06383	0.0326399	0.058	deCODE genetics	N/A
		Phet= 0.28; I2 = 19%						0.586423	1.13164	0.0501983	0.013757	EPITHYR	1.000
								0.596787	1.28463	0.0945284	0.00805642	EPIC	1.000
								0.570756	1.18164	0.0638332	0.00893018	UKBB	N/A
								0.577684	1.22744	0.118349	0.0833515	Italian	N/A
								0.604257	1.17531	0.036143	7.96e-06	Finngen	N/A
								0.585827	1.13235	0.019882	4.19e-10	Meta-analysis	-
19p12	204	rs8105767	ZNF257	19	22032639	G	A	0.2961	1.18	0.035487	3.1e-06	deCODE genetics	N/A
		Phet= 0.39; I2 = 5%						0.28752	1.22537	0.0552769	0.000236107	EPITHYR	0.993
								0.271953	0.969667	0.0991919	0.756151	EPIC	0.993
								0.287267	1.12594	0.0671723	0.0774074	UKBB	N/A
								0.301789	1.0051	0.123748	0.967238	Italian	N/A
								0.316229	1.13107	0.037131	0.000914	Finngen	N/A
								0.299324	1.14916	0.021151	5.09e-11	Meta-analysis	-
22q12.1	21	rs186430430	CHEK2	22	28707610	C	T	0.0056	1.98	0.280835	0.015	deCODE genetics	N/A
		Phet= 0.11; I2 = 55%						0.007199	3.84407	0.138653	2.87e-22	Finngen	N/A
								0.006433	3.37538	0.124326	1.4e-22	Meta-analysis	-
