# Supplementary material for: Large-scale association analysis identified novel differentiated thyroid carcinoma risk loci by integrating transcriptome and proteome
Source: Research Square preprint supplement (doi:10.21203/rs.3.rs-6751995/v1), 2025-07-18
Supplement: Supplementary file 8 [file a7591deb67f0fd1fd06853de.xlsx]

## Sheet: Contents
	Contents
	Supplementary Table 1	Genome-wide association study analysis result that are identified across all studies
	Supplementary Table 2	Transcriptome-wide association study results using thyroid-relevant tissues from GTEx including thyroid, whole blood, pituatary, and brain hypothalamus
	Supplementary Table 3	Result of Baysian colocalization analysis of transcriptome (eQTLs) with differentiated thyroid carcinoma (DTC)
	Supplementary Table 4	FOCUS fine mapping analysis results of DTC identified genes across 49 tissues
	Supplementary Table 5	Results of transcriptome-wide association study (TWAS) using all 49 available tissues from GTEx
	Supplementary Table 6	Results of transcriptome-wide association study (TWAS) using thyroid cancer tissue from TCGA databse
	Supplementary Table 7	Results of brain and plasma blood proteome-wide association study (PWAS) using ROSMAP and AIRC study
	Supplementary Table 8	Result of Baysian colocalization analysis of proteome (pQTL) with differentiated thyroid carcinoma (DTC)
	Supplementary Table 9	Gene Set Enrichment Analysis of pathways and biological processes associated with identified genes from GWAS, TWAS and PWAS
	Supplementary Table 10	Effect estimates used in the PRS model in the study group EPIC and EPITYHR
	Supplementary Table 11	Comparison of MR casual estimates between MVMR and IVW (different clumping thresholds)

## Sheet: S11
Supplementary Table 11. Comparison of MR casual estimates between MVMR and IVW (different clumping thresholds)
r2: Clumping threshold; N: number of SNPs used; OR: Odds Ratio
					MVMR (r2<0.1)		IVW (r2<0.001)		IVW (r2<0.1)
Locus	Gene	F-statistics (r2<0.1)	Conditional F-statistics	Horizontal Pleiotropy	N	OR	N	OR	N	OR
1q41	TGFB2	23.08	-	-	-	-	1	0.6 (0.52-0.69)	4	0.57 (0.52-0.64)
1q43	SDCCAG8	12.5	-	-	-	-	1	1.44 (1.24-1.67)	4	1.34 (1.12-1.61)
	CEP170	20.0827	8.39	p-value < 0.001	5	2.23(1.15-4.34)	1	2.25 (1.68-3.01)	2	2.25 (1.73-2.92)
3q26.2	LRRC34	13.6382	-	-	-	-	1	1.32 (1.19-1.47)	4	1.23 (1.09-1.39)
	MECOM	18.4274	-	-	-	-	1	2.03 (1.63-2.52)	2	1.52 (0.82-2.82)
8p12	NRG1	22.3	-	-	-	-	3	1.4 (1.17-1.67)	23	1.38 (1.3-1.46)
9q22.33	TRMO	13.206	-	-	-	-	1	0.67 (0.63-0.71)	6	0.8 (0.66-0.97)
	HEMGN	21.401	-	-	-	-	1	1.61 (1.39-1.86)	1	1.61 (1.39-1.86)
	CORO2A	13.4144	6.62	p-value: 0.095	8	1.22(1.05-1.42)	2	1.1 (1-1.21)	7	1.14 (1.03-1.25)
	ANP32B	23.2501	-	-	-	-	1	1.89 (1.09-3.3)	1	1.89 (1.09-3.3)
9p22.1	HAUS6	15.5957	-	-	-	-	2	0.78 (0.58-1.03)	2	0.78 (0.58-1.04)
14q13.3	PTCSC3	14.505	-	-	-	-	2	1.68 (0.89-3.16)	5	1.93 (1.35-2.77)
14q22.2	SAMD4A	22.6	-	-	-	-	1	1.82 (1.39-2.39)	2	1.65 (1.25-2.17)
15q22.33	SMAD3	21.38	-	-	-	-	1	0.66 (0.6-0.72)	5	0.63 (0.59-0.68)
15q15.1	RAD51-AS1	19.144	7.89	p-value: 0.880	6	0.41(0.25-0.66)	1	0.24 (0.14-0.4)	2	0.26 (0.18-0.37)
	CCDC32	10.4123	6.8	p-value: 0.875	21	1.09(0.96-1.23)	2	1.19 (1.03-1.37)	15	1.16 (1.09-1.25)
16q23.2	MPHOSPH6	16.2938	-	-	-	-	1	1.17 (1.09-1.25)	2	1.15 (1.08-1.23)
19p12	ZNF257	10.6712	0.982	p-value: 0.987	10	0.93(0.82-1.06)	1	1.3 (1.19-1.41)	17	1.16 (1.07-1.26)
					MVMR (r2<0.1)		IVW (r2<0.001)		IVW (r2<0.1)
Locus	Protein	F-statistics (r2<0.1)	cond. F-statistics	Horizontal Pleiotropy	nsnp	OR	nsnp	OR	nsnp	OR
1p36.22	MTHFR	20.52	-	-	-	-	1	0.56 (0.41-0.76)	4	0.51 (0.33-0.79)
9q22.33	NANS	15.5	8.04	p-value: 0.228	4	3.37(1.86-6.13)	1	3.6 (2.41-5.37)	4	5.25 (0.6-46.15)
11q22.3	KDELC2	38.84	21.52	p-value: 0.1346909	12	0.84 (0.76-0.92)	4	0.81 (0.69-0.95)	24	0.86 (0.78-0.94)
14q22.2	SAMD4A	12.3056	-	-	-	-	1	1.54 (1.27-1.87)	2	1.59 (1.33-1.9)
15q15.1	EIF2AK4	10.7	1.3	p-value: 0.5679641	4	2.60 (1.16-5.84)	1	3.25 (1.41-7.52)	3	2.63 (1.47-4.7)
	RMDN3	35.3057	-	-	-	-	1	6.72 (3.35-13.46)	2	3.68 (0.67-20.1)
20p12.2	JAG1	35.34	-	-	-	-	2	1.66 (1.05-2.6)	3	1.56 (1.17-2.09)
