# Supplementary material for: Large-scale association analysis identified novel differentiated thyroid carcinoma risk loci by integrating transcriptome and proteome
Source: Research Square preprint supplement (doi:10.21203/rs.3.rs-6751995/v1), 2025-07-18
Supplement: Supplementary file 9 [file d7e1d96430ff6aa9244c2361.xlsx]

## Sheet: Contents
	Contents
	Supplementary Table 1	Genome-wide association study analysis result that are identified across all studies
	Supplementary Table 2	Transcriptome-wide association study results using thyroid-relevant tissues from GTEx including thyroid, whole blood, pituatary, and brain hypothalamus
	Supplementary Table 3	Result of Baysian colocalization analysis of transcriptome (eQTLs) with differentiated thyroid carcinoma (DTC)
	Supplementary Table 4	FOCUS fine mapping analysis results of DTC identified genes across 49 tissues
	Supplementary Table 5	Results of transcriptome-wide association study (TWAS) using all 49 available tissues from GTEx
	Supplementary Table 6	Results of transcriptome-wide association study (TWAS) using thyroid cancer tissue from TCGA databse
	Supplementary Table 7	Results of brain and plasma blood proteome-wide association study (PWAS) using ROSMAP and AIRC study
	Supplementary Table 8	Result of Baysian colocalization analysis of proteome (pQTL) with differentiated thyroid carcinoma (DTC)
	Supplementary Table 9	Gene Set Enrichment Analysis of pathways and biological processes associated with identified genes from GWAS, TWAS and PWAS
	Supplementary Table 10	Effect estimates used in the PRS model in the study group EPIC and EPITYHR
	Supplementary Table 11	Comparison of MR casual estimates between MVMR and IVW (different clumping thresholds)

## Sheet: S4
Supplementary Table 4. FOCUS fine mapping analysis results of DTC identified genes across 49 tissues
cv.R2: A cross-validated R2 of tissue model's correlation to gene's measured transcriptome (prediction performance)
PIP: Posterior inclusion probablities
Chromosome	position_start	position_stop	Gene ID	Gene name	Tissue	Type	Block Gene	cv.R2	cv.R2.pval	TWAS Z	FOCUS PIP
14	35554673	35591723	ENSG00000092020	PPP2R3C	skin_sun_exposed_lower_leg	protein_coding	54	0.0720892	1.35091e-07	7	1
14	36530232	36536396	ENSG00000257826	RP11-116N8.4	thyroid	lincRNA	54	0.202197	2.91156e-19	-12.9	0.999
5	110559351	110830584	ENSG00000152495	CAMK4	nerve_tibial	protein_coding	20	0.0438383	0.0100554	-7.71	0.997
15	67356101	67487533	ENSG00000166949	SMAD3	thyroid	protein_coding	30	0.238084	7.78743e-17	-10.1	0.995
6	42928496	42931618	ENSG00000124713	GNMT	brain_spinal_cord_cervical_c-1	protein_coding	32	0.114085	0.00213909	-5.93	0.993
19	7112266	7294045	ENSG00000171105	INSR	thyroid	protein_coding	69	0.0139581	0.00513028	5.95	0.99
5	418818	419224	ENSG00000250645	CTD-2228K2.1	thyroid	pseudogene	36	0.0103442	0.351098	7.8	0.988
16	79710005	79841819	ENSG00000260876	RP11-345M22.1	testis	lincRNA	19	0.0368102	0.0198131	7.03	0.986
14	35591052	35743271	ENSG00000100890	KIAA0391	skin_sun_exposed_lower_leg	protein_coding	54	0.131039	8.83034e-10	7.47	0.982
8	31496902	32622548	ENSG00000157168	NRG1	thyroid	protein_coding	10	0.441677	4.56722e-45	13.3	0.956
18	657604	673578	ENSG00000176890	TYMS	esophagus_mucosa	protein_coding	35	0.0871287	0.00025108	5.82	0.947
19	22882154	22882487	ENSG00000241282	RPL34P33	artery_tibial	pseudogene	77	0.0233757	0.215995	6.9	0.862
15	40380091	40401093	ENSG00000104081	BMF	blood	protein_coding	47	0.0186945	6.40373e-07	-3.81	0.783
3	169511216	169530774	ENSG00000171757	LRRC34	breast_mammary_tissue	protein_coding	50	0.00510882	0.263481	6.43	0.696
6	42928496	42931618	ENSG00000124713	GNMT	whole_blood	protein_coding	32	0.108061	4.15831e-09	3.06	0.694
16	72127461	72146811	ENSG00000140829	DHX38	brain_caudate_basal_ganglia	protein_coding	59	0.0526757	0.0938399	5.07	0.605
1	243419320	243663394	ENSG00000054282	SDCCAG8	esophagus_muscularis	protein_coding	36	0.0853282	1.3238e-05	7.26	0.537
8	33228342	33330940	ENSG00000172728	FUT10	heart_atrial_appendage	protein_coding	10	0.22985	6.90748e-11	-2.29	0.53
12	65444406	65515346	ENSG00000156076	WIF1	muscle_skeletal	protein_coding	31	0.101055	4.41559e-07	-3.42	0.499
18	721588	812547	ENSG00000176105	YES1	brain_substantia_nigra	protein_coding	35	0.0663775	0.0362963	3.18	0.433
8	33330904	33371119	ENSG00000129696	TTI2	brain_cerebellar_hemisphere	protein_coding	10	0.0609172	0.00240473	3.06	0.427
7	127220672	127233665	ENSG00000179562	GCC1	heart_left_ventricle	protein_coding	20	0.0476474	0.00751334	3.15	0.406
6	43477440	43497323	ENSG00000171453	POLR1C	brain_frontal_cortex_ba9	protein_coding	32	0.0557096	0.0623647	-5.19	0.402
16	71879894	71919171	ENSG00000224470	ATXN1L	breast_mammary_tissue	protein_coding	59	0.0508973	0.0206859	5.05	0.395
5	1801514	1816719	ENSG00000145494	NDUFS6	adipose_subcutaneous	protein_coding	36	0.0274629	0.000965204	3.72	0.378
9	18927656	19033251	ENSG00000155875	FAM154A	nerve_tibial	protein_coding	30	0.0308976	0.0014492	-6.08	0.356
7	125071401	125106455	ENSG00000227869	RP11-807H17.1	brain_cortex	lincRNA	20	0.0899502	0.186652	3.82	0.348
5	1008944	1039058	ENSG00000145506	NKD2	spleen	protein_coding	36	0.0555418	0.0256552	-6.36	0.345
18	641320	658340	ENSG00000176912	C18orf56	esophagus_gastroesophageal_junction	protein_coding	35	0.0971252	0.00325981	4.07	0.314
6	42847356	42857663	ENSG00000146223	RPL7L1	skin_sun_exposed_lower_leg	protein_coding	32	0.191761	9.72888e-20	4.61	0.309
18	596988	650334	ENSG00000079101	CLUL1	brain_cortex	protein_coding	35	0.323862	2.75737e-07	-4.17	0.305
15	41028082	41048049	ENSG00000137824	RMDN3	adipose_subcutaneous	protein_coding	47	0.0278683	0.00158287	5.11	0.304
1	232533711	232697304	ENSG00000116991	SIPA1L2	esophagus_muscularis	protein_coding	15	0.0794961	0.000248249	3.09	0.303
15	68126648	68131217	ENSG00000245719	RP11-34F13.2	skin_sun_exposed_lower_leg	lincRNA	30	0.0167014	0.000266351	2.51	0.298
9	19053141	19103117	ENSG00000147874	HAUS6	adipose_subcutaneous	protein_coding	30	0.0638626	4.79392e-06	-6.08	0.295
1	62208149	62629592	ENSG00000132849	INADL	esophagus_muscularis	protein_coding	15	0.151529	2.20445e-07	2.84	0.274
5	112357796	112824527	ENSG00000171444	MCC	prostate	protein_coding	20	0.119119	0.00331334	-3.82	0.262
7	124800028	124800601	ENSG00000205898	RP11-3B12.4	artery_tibial	pseudogene	20	0.25793	3.73862e-23	-3.65	0.261
10	77360998	78319925	ENSG00000148655	C10orf11	heart_atrial_appendage	protein_coding	32	0.0644072	0.0245439	2.92	0.245
12	65107225	65153227	ENSG00000135677	GNS	colon_transverse	protein_coding	31	0.0504831	0.000125891	3.41	0.233
5	110831731	110848288	ENSG00000164211	STARD4	pancreas	protein_coding	20	0.0890863	0.0017296	-3.79	0.233
15	66585555	66626236	ENSG00000166938	DIS3L	brain_spinal_cord_cervical_c-1	protein_coding	30	0.225765	0.000366464	-2.47	0.22
7	124791380	124793665	ENSG00000224899	RP11-3B12.5	artery_aorta	lincRNA	20	0.112289	3.60395e-06	-3.59	0.202
1	243419320	243663394	ENSG00000054282	SDCCAG8	ovary	protein_coding	36	0.131738	3.06944e-05	7.12	0.199
15	41809374	41836467	ENSG00000103932	RPAP1	adrenal_gland	protein_coding	47	0.105639	5.91101e-07	-5.05	0.193
9	19053141	19103117	ENSG00000147874	HAUS6	adipose_visceral_omentum	protein_coding	30	0.0751796	4.67514e-05	-6.01	0.184
1	234040679	234460262	ENSG00000183780	SLC35F3	brain_hippocampus	protein_coding	15	0.036329	0.0819705	-2.89	0.182
8	133133108	133493200	ENSG00000184156	KCNQ3	spleen	protein_coding	19	0.042926	0.00867298	2.46	0.152
15	41028082	41048049	ENSG00000137824	RMDN3	brain_anterior_cingulate_cortex_ba24	protein_coding	47	0.018189	0.0372712	5.07	0.151
1	244270667	244272313	ENSG00000237759	RP11-278H7.3	brain_cerebellum	lincRNA	36	0.0376482	0.231328	7.08	0.15
8	32853696	32902373	ENSG00000247134	RP11-11N9.4	cells_ebv-transformed_lymphocytes	lincRNA	10	0.0103843	0.253154	2.2	0.149
8	30891317	31031285	ENSG00000165392	WRN	cells_transformed_fibroblasts	protein_coding	10	0.0692418	0.000604858	-3.41	0.13
3	169490619	169507504	ENSG00000085274	MYNN	testis	protein_coding	50	0.143662	5.44935e-06	-5.33	0.128
18	641320	658340	ENSG00000176912	C18orf56	esophagus_muscularis	protein_coding	35	0.164542	1.9301e-11	4.13	0.127
1	59762310	60233347	ENSG00000172456	FGGY	adipose_subcutaneous	protein_coding	15	0.0539876	0.0229403	-2.61	0.124
3	169511216	169530774	ENSG00000171757	LRRC34	colon_sigmoid	protein_coding	50	0.0804824	5.45044e-05	6.12	0.118
7	124791380	124793665	ENSG00000224899	RP11-3B12.5	artery_tibial	lincRNA	20	0.0294137	3.46318e-05	-3.39	0.116
7	124800028	124800601	ENSG00000205898	RP11-3B12.4	artery_coronary	pseudogene	20	0.292886	2.76006e-11	-3.39	0.111
15	3.94411e+07	3.94411e+07	ENSG00000259450.1	RP11-265N7.1	pancreas	lincRNA	47	0.107701	9.423e-06	-3.61	0.11
5	112312399	112356667	ENSG00000172795	DCP2	thyroid	protein_coding	20	0.231736	6.8326e-21	6.56	0.108
3	168645957	168646386	ENSG00000273177	RP11-368I23.4	brain_spinal_cord_cervical_c-1	lincRNA	50	0.0769126	0.0505445	-2.97	0.107
1	243419320	243663394	ENSG00000054282	SDCCAG8	nerve_tibial	protein_coding	36	0.276023	1.21885e-21	6.99	0.104
12	66741211	67197966	ENSG00000155974	GRIP1	heart_atrial_appendage	protein_coding	31	0.0770258	2.01795e-05	3.2	0.104
12	66517697	66563765	ENSG00000155957	TMBIM4	brain_cerebellar_hemisphere	protein_coding	31	0.181327	3.6483e-06	-2.7	0.103
18	670324	712676	ENSG00000132199	ENOSF1	nerve_tibial	protein_coding	35	0.136489	5.41993e-10	-2.06	0.103
18	670324	712676	ENSG00000132199	ENOSF1	esophagus_muscularis	protein_coding	35	0.260861	3.90335e-18	4.39	0.102
5	112212084	112258236	ENSG00000129625	REEP5	lung	protein_coding	20	0.0679055	8.8817e-05	2.84	0.101
8	134420249	134421471	ENSG00000225259	ST13P6	brain_cerebellum	pseudogene	19	0.0530437	0.10571	-2.24	0.0996
15	41679551	41694717	ENSG00000137806	NDUFAF1	muscle_skeletal	protein_coding	47	0.668094	1.549e-99	4.84	0.0981
15	41809374	41836467	ENSG00000103932	RPAP1	colon_sigmoid	protein_coding	47	0.151954	1.39435e-07	-4.84	0.0981
15	41624892	41673248	ENSG00000137804	NUSAP1	heart_left_ventricle	protein_coding	47	0.0692239	0.000188423	-4.84	0.0981
8	33228342	33330940	ENSG00000172728	FUT10	ovary	protein_coding	10	0.109488	0.170949	0.14	0.0931
19	5784843	5791249	ENSG00000141994	DUS3L	heart_left_ventricle	protein_coding	69	0.385408	1.26606e-18	1.1	0.0929
19	6361463	6368919	ENSG00000125656	CLPP	brain_cortex	protein_coding	69	0.109946	0.000822845	-4.91	0.0924
12	65107225	65153227	ENSG00000135677	GNS	skin_not_sun_exposed_suprapubic	protein_coding	31	0.0778105	0.00495848	3.01	0.09
9	20197274	20197274	ENSG00000227071.1	RP11-4E23.2	pituitary	lincRNA	30	0.0507301	0.132797	-1.98	0.0869
19	22235254	22274282	ENSG00000197134	ZNF257	nerve_tibial	protein_coding	77	0.229623	3.28456e-16	6.29	0.0852
15	68346517	68483096	ENSG00000033800	PIAS1	esophagus_gastroesophageal_junction	protein_coding	30	0.125696	9.68657e-05	-2.04	0.0807
1	233086351	233119628	ENSG00000135778	NTPCR	cells_ebv-transformed_lymphocytes	protein_coding	15	0.509379	1.11603e-15	1.58	0.0787
9	19053141	19103117	ENSG00000147874	HAUS6	adipose	protein_coding	30	0.0348912	4.91884e-06	-5.77	0.0765
5	112312399	112356667	ENSG00000172795	DCP2	esophagus_gastroesophageal_junction	protein_coding	20	0.136178	0.000187475	-2.95	0.0761
9	19053141	19103117	ENSG00000147874	HAUS6	artery_tibial	protein_coding	30	0.111216	5.09097e-12	-5.79	0.0742
1	218458629	218511325	ENSG00000067533	RRP15	brain_putamen_basal_ganglia	protein_coding	19	0.321713	2.31201e-08	2.39	0.0726
7	124800028	124800601	ENSG00000205898	RP11-3B12.4	artery_aorta	pseudogene	20	0.296796	2.84804e-21	-3.2	0.0724
8	33218361	33218933	ENSG00000272338	RP11-722E23.2	brain_cerebellar_hemisphere	lincRNA	10	0.0312232	0.0210659	-6.31	0.0708
5	1798500	1801480	ENSG00000171421	MRPL36	thyroid	protein_coding	36	0.178437	3.04355e-17	-3.34	0.0705
9	19375713	19380252	ENSG00000137154	RPS6	esophagus_muscularis	protein_coding	30	0.0334925	0.00131794	2.61	0.0701
12	65107225	65153227	ENSG00000135677	GNS	artery_aorta	protein_coding	31	0.259219	1.41277e-16	2.54	0.0673
12	66517697	66563765	ENSG00000155957	TMBIM4	brain_cerebellum	protein_coding	31	0.164969	2.21586e-12	-2.53	0.0647
12	66582659	66648402	ENSG00000090376	IRAK3	nerve_tibial	protein_coding	31	0.142859	1.34588e-09	3.05	0.063
9	19053141	19103117	ENSG00000147874	HAUS6	heart_atrial_appendage	protein_coding	30	0.0681575	0.0034431	-4.68	0.0617
19	22684501	22684750	ENSG00000270317	AC004004.2	pancreas	pseudogene	77	0.0656992	0.000266486	-2.58	0.0602
16	81009698	81053875	ENSG00000103121	CMC2	liver	protein_coding	19	0.0461937	0.0872884	2.56	0.0601
15	40820882	40857256	ENSG00000128891	C15orf57	colon_transverse	protein_coding	47	0.48656	1.19597e-31	3.33	0.0596
16	79738620	79738620	ENSG00000261390.1	RP11-345M22.2	brain_hypothalamus	lincRNA	19	0.0869544	0.00277371	-6.29	0.0586
1	231762561	232177018	ENSG00000162946	DISC1	cells_transformed_fibroblasts	protein_coding	15	0.218515	1.05408e-12	2.31	0.0582
15	66782473	66790151	ENSG00000174446	SNAPC5	skin_not_sun_exposed_suprapubic	protein_coding	30	0.0946991	1.88952e-06	1.95	0.0577
5	1253262	1295184	ENSG00000164362	TERT	skin_not_sun_exposed_suprapubic	protein_coding	36	0.0212448	0.00352516	-5.35	0.0571
8	133787618	133861052	ENSG00000129292	PHF20L1	artery_tibial	protein_coding	19	0.0119052	0.213287	-1.84	0.0563
18	670324	712676	ENSG00000132199	ENOSF1	esophagus_gastroesophageal_junction	protein_coding	35	0.140519	2.10068e-07	4.35	0.056
18	657604	673578	ENSG00000176890	TYMS	testis	protein_coding	35	0.302959	1.88757e-15	-4.1	0.0552
9	19053141	19103117	ENSG00000147874	HAUS6	artery_aorta	protein_coding	30	0.0685345	0.000217351	-5.78	0.0544
18	670324	712676	ENSG00000132199	ENOSF1	thyroid	protein_coding	35	0.0366273	0.0216352	5.45	0.0531
1	241792155	241799232	ENSG00000203668	CHML	pancreas	protein_coding	36	0.0678529	0.0029869	-1.92	0.0527
1	233086351	233119628	ENSG00000135778	NTPCR	artery_tibial	protein_coding	15	0.338487	1.05686e-23	1.97	0.0522
15	40820882	40857256	ENSG00000128891	C15orf57	thyroid	protein_coding	47	0.340798	7.21452e-31	5.02	0.0517
6	43331217	43331957	ENSG00000179157	RPS2P28	adipose_subcutaneous	pseudogene	32	0.0321133	0.000221922	-3.91	0.0508
3	169511216	169530774	ENSG00000171757	LRRC34	artery_aorta	protein_coding	50	0.126869	8.92732e-08	5.95	0.0505
19	6.20364e+06	6.20364e+06	ENSG00000267427.1	CTC-503J8.6	cells_ebv-transformed_lymphocytes	lincRNA	69	-0.0229187	0.141825	-2.41	0.0497
1	62146718	62191095	ENSG00000162604	TM2D1	artery_tibial	protein_coding	15	0.0578547	0.000106429	2.01	0.0483
1	233086351	233119628	ENSG00000135778	NTPCR	brain_substantia_nigra	protein_coding	15	0.365316	7.47611e-06	0.874	0.0481
12	64845660	64895888	ENSG00000183735	TBK1	nerve_tibial	protein_coding	31	0.0543423	0.00519818	2.41	0.0479
1	218458629	218511325	ENSG00000067533	RRP15	adipose_subcutaneous	protein_coding	19	0.190026	2.25358e-17	2.07	0.0478
8	32431284	32431284	ENSG00000272327.1	RP11-1002K11.1	thyroid	lincRNA	10	0.424273	9.48986e-39	12.9	0.0477
9	19408925	19452018	ENSG00000177076	ACER2	brain_hypothalamus	protein_coding	30	0.11966	0.15084	2.79	0.0475
1	231762561	232177018	ENSG00000162946	DISC1	artery_tibial	protein_coding	15	0.0391983	4.54262e-05	2.21	0.0473
1	218458629	218511325	ENSG00000067533	RRP15	testis	protein_coding	19	0.653369	8.1768e-40	2.04	0.0471
8	31496902	32622548	ENSG00000157168	NRG1	brain_frontal_cortex_ba9	protein_coding	10	-0.00388196	0.0346288	5.5	0.0471
1	59762310	60233347	ENSG00000172456	FGGY	artery_tibial	protein_coding	15	0.152063	9.00342e-11	-2.18	0.0468
1	234040679	234460262	ENSG00000183780	SLC35F3	minor_salivary_gland	protein_coding	15	0.306195	0.0254039	-2.35	0.0466
9	19375713	19380252	ENSG00000137154	RPS6	colon_transverse	protein_coding	30	0.0112216	0.0448364	2.27	0.0465
6	42847356	42857663	ENSG00000146223	RPL7L1	colon_sigmoid	protein_coding	32	0.105206	0.0016516	3.85	0.0461
1	218458628	218511325	ENSG00000067533	RRP15	brain_dorsolateral_prefrontal_cortex	protein_coding	19	0.519137	8.99373e-74	2.08	0.0451
6	42931608	42946958	ENSG00000124587	PEX6	skin_sun_exposed_lower_leg	protein_coding	32	0.703774	1.01395e-93	3.9	0.045
16	78133310	79246564	ENSG00000186153	WWOX	artery_aorta	protein_coding	19	0.258521	3.16158e-19	1.98	0.0448
8	32416274	32416274	ENSG00000272327.1	RP11-1002K11.1	liver	lincRNA	10	0.052777	0.00206245	7.58	0.0439
1	233463514	233520894	ENSG00000143674	MLK4	thyroid	protein_coding	15	0.0345812	0.0245727	2.16	0.0438
10	104221149	104236802	ENSG00000138111	TMEM180	brain_putamen_basal_ganglia	protein_coding	63	0.0595181	0.000857743	2.23	0.043
1	231114727	231136341	ENSG00000173409	ARV1	artery_aorta	protein_coding	15	0.0351054	0.0801958	-2.16	0.0417
1	62208149	62629592	ENSG00000132849	INADL	nerve_tibial	protein_coding	15	0.224264	1.02409e-17	-2.05	0.0416
15	69591286	69700119	ENSG00000137819	PAQR5	cells_transformed_fibroblasts	protein_coding	30	0.383125	3.95649e-26	2.3	0.0416
5	892758	919472	ENSG00000071539	TRIP13	adipose_subcutaneous	protein_coding	36	0.0233829	0.213607	-2.52	0.0409
12	65993716	65993716	ENSG00000256268.1	RP11-221N13.3	heart_atrial_appendage	lincRNA	31	0.0137336	0.192961	-2.31	0.0395
15	41849873	41871536	ENSG00000092445	TYRO3	nerve_tibial	protein_coding	47	0.0768968	0.000507961	-5.06	0.0395
8	30891317	31031285	ENSG00000165392	WRN	breast_mammary_tissue	protein_coding	10	0.184891	1.51649e-09	-1.69	0.0395
1	62208149	62629592	ENSG00000132849	INADL	pancreas	protein_coding	15	0.142289	1.75943e-05	1.98	0.039
15	68765935	68765935	ENSG00000261425.1	RP11-709B3.2	adipose_subcutaneous	lincRNA	30	0.0217017	0.00345992	-2.16	0.039
1	218458629	218511325	ENSG00000067533	RRP15	brain_amygdala	protein_coding	19	0.0815751	0.00298739	1.93	0.0388
1	218519577	218617961	ENSG00000092969	TGFB2	cells_transformed_fibroblasts	protein_coding	19	0.0223431	0.0454703	1.66	0.0386
1	231154704	231175992	ENSG00000182118	FAM89A	breast_mammary_tissue	protein_coding	15	0.014105	0.269077	2.14	0.0386
12	65563350	65642141	ENSG00000174106	LEMD3	brain_dorsolateral_prefrontal_cortex	protein_coding	31	0.0322375	7.31609e-05	2.38	0.0378
18	596988	650334	ENSG00000079101	CLUL1	pituitary	protein_coding	35	0.167303	0.00273614	-2.64	0.0377
16	78133310	79246564	ENSG00000186153	WWOX	stomach	protein_coding	19	0.113147	1.30574e-05	2.62	0.0376
1	218458629	218511325	ENSG00000067533	RRP15	pituitary	protein_coding	19	0.301505	2.53154e-12	1.91	0.0375
1	218458629	218511325	ENSG00000067533	RRP15	brain_hippocampus	protein_coding	19	0.18955	2.06879e-06	1.91	0.0375
1	218458629	218511325	ENSG00000067533	RRP15	small_intestine_terminal_ileum	protein_coding	19	0.0239185	0.0249255	1.91	0.0373
1	218458629	218511325	ENSG00000067533	RRP15	brain_caudate_basal_ganglia	protein_coding	19	0.34287	2.13997e-11	2.02	0.0373
1	218458629	218511325	ENSG00000067533	RRP15	artery_coronary	protein_coding	19	0.00357312	0.00147158	1.91	0.0372
9	20995306	21031635	ENSG00000188921	PTPLAD2	esophagus_mucosa	protein_coding	30	0.0947765	1.3598e-08	-1.83	0.0371
6	42952237	42980080	ENSG00000112640	PPP2R5D	whole_blood	protein_coding	32	0.0372183	0.0267399	1.96	0.0368
9	19053141	19103117	ENSG00000147874	HAUS6	brain_cerebellum	protein_coding	30	0.099766	3.61004e-05	4.7	0.0367
16	78133310	79246564	ENSG00000186153	WWOX	breast_mammary_tissue	protein_coding	19	0.137323	2.36662e-10	0.809	0.0361
5	111478138	111755013	ENSG00000129595	EPB41L4A	brain_substantia_nigra	protein_coding	20	0.0579017	0.0824382	-4.25	0.0358
1	62208149	62629592	ENSG00000132849	INADL	esophagus_mucosa	protein_coding	15	0.0653651	1.08022e-05	1.79	0.0357
1	218458629	218511325	ENSG00000067533	RRP15	colon_transverse	protein_coding	19	0.0537672	0.00219608	1.9	0.0354
9	19053141	19103117	ENSG00000147874	HAUS6	cells_transformed_fibroblasts	protein_coding	30	0.143535	9.98477e-09	-5.2	0.0353
1	218458629	218511325	ENSG00000067533	RRP15	brain_frontal_cortex_ba9	protein_coding	19	0.177019	1.27076e-08	1.9	0.0351
19	5691845	5720583	ENSG00000196365	LONP1	brain_putamen_basal_ganglia	protein_coding	69	0.266402	0.00153201	2	0.0351
12	64845660	64895888	ENSG00000183735	TBK1	esophagus_muscularis	protein_coding	31	0.0191482	0.00120364	2.25	0.0348
1	218458629	218511325	ENSG00000067533	RRP15	muscle_skeletal	protein_coding	19	0.206435	7.56322e-23	1.97	0.0347
9	19375713	19380252	ENSG00000137154	RPS6	thyroid	protein_coding	30	0.0571645	0.0126869	1.89	0.0345
1	218458629	218511325	ENSG00000067533	RRP15	brain_hypothalamus	protein_coding	19	0.232724	1.03026e-08	1.91	0.0344
1	218458629	218511325	ENSG00000067533	RRP15	artery_aorta	protein_coding	19	0.180951	5.23661e-11	1.88	0.0344
15	40820882	40857256	ENSG00000128891	C15orf57	brain_hippocampus	protein_coding	47	0.236063	0.000424319	3.51	0.0341
1	218458629	218511325	ENSG00000067533	RRP15	cells_ebv-transformed_lymphocytes	protein_coding	19	0.133369	6.62237e-05	2.04	0.034
1	218458629	218511325	ENSG00000067533	RRP15	adipose	protein_coding	19	0.233814	1.72232e-34	1.95	0.0339
1	243419320	243663394	ENSG00000054282	SDCCAG8	pituitary	protein_coding	36	0.0262747	0.278081	6.8	0.0338
1	218458629	218511325	ENSG00000067533	RRP15	liver	protein_coding	19	0.130217	1.20752e-05	2.06	0.0335
7	124386051	124405681	ENSG00000170775	GPR37	nerve_tibial	protein_coding	20	0.12596	2.85822e-08	-2.52	0.0334
1	218458629	218511325	ENSG00000067533	RRP15	lung	protein_coding	19	0.201598	1.20016e-17	1.83	0.0332
10	79550549	79686378	ENSG00000151208	DLG5	small_intestine_terminal_ileum	protein_coding	32	0.353337	1.01451e-07	1.69	0.0331
15	41062159	41064643	ENSG00000188277	C15orf62	brain_cerebellar_hemisphere	protein_coding	47	0.0618304	0.0980566	3.38	0.0329
8	132916334	133025884	ENSG00000132294	EFR3A	blood	protein_coding	19	0.00559657	0.00476417	1.39	0.0326
15	40820882	40857256	ENSG00000128891	C15orf57	muscle_skeletal	protein_coding	47	0.418599	1.93369e-48	4.45	0.0325
18	596988	650334	ENSG00000079101	CLUL1	heart_atrial_appendage	protein_coding	35	0.141477	4.6068e-07	-0.389	0.0325
8	33228342	33330940	ENSG00000172728	FUT10	vagina	protein_coding	10	0.296082	3.93253e-05	-0.539	0.0325
1	60452941	60539442	ENSG00000162598	C1orf87	artery_aorta	protein_coding	15	0.0819759	2.09094e-05	1.9	0.0323
12	65672422	65860687	ENSG00000174099	MSRB3	blood	protein_coding	31	0.00233266	0.0483271	-2.66	0.0322
15	40820882	40857256	ENSG00000128891	C15orf57	stomach	protein_coding	47	0.487653	2.27704e-30	3.52	0.0321
1	218458629	218511325	ENSG00000067533	RRP15	esophagus_gastroesophageal_junction	protein_coding	19	0.0816896	0.00187559	1.78	0.0319
1	218458629	218511325	ENSG00000067533	RRP15	skin_sun_exposed_lower_leg	protein_coding	19	0.13574	1.00307e-10	1.86	0.0318
8	134241299	134241940	ENSG00000104415	WISP1	heart_atrial_appendage	protein_coding	19	0.0498958	0.0290672	-1.56	0.0318
12	64798130	64844907	ENSG00000184575	XPOT	uterus	protein_coding	31	0.0667988	0.129491	2.16	0.0317
8	31496902	32622548	ENSG00000157168	NRG1	liver	protein_coding	10	0.04759	4.17732e-05	8.96	0.031
1	218458629	218511325	ENSG00000067533	RRP15	breast_mammary_tissue	protein_coding	19	0.122203	1.33299e-07	1.8	0.0307
3	169511216	169530774	ENSG00000171757	LRRC34	esophagus_gastroesophageal_junction	protein_coding	50	0.0734755	0.00132963	4.99	0.0304
8	132916335	133025889	ENSG00000132294	EFR3A	colon_transverse	protein_coding	19	0.0452298	0.0002188	1.5	0.0303
1	216676588	217311097	ENSG00000196482	ESRRG	brain_amygdala	protein_coding	19	0.0554849	0.223171	1.57	0.0301
19	22115760	22193751	ENSG00000160321	ZNF208	artery_coronary	protein_coding	77	0.107613	0.0241936	-2.1	0.03
12	66516842	66524548	ENSG00000139233	LLPH	testis	protein_coding	31	0.0981071	0.000870895	2.05	0.0295
15	40820882	40857256	ENSG00000128891	C15orf57	colon_sigmoid	protein_coding	47	0.533021	1.47081e-27	3.7	0.0293
19	5823813	5828335	ENSG00000171119	NRTN	skin_sun_exposed_lower_leg	protein_coding	69	0.0946063	5.24459e-07	-0.585	0.0292
19	6379580	6393992	ENSG00000125651	GTF2F1	thyroid	protein_coding	69	0.0628896	5.1018e-06	-0.585	0.0292
10	79540095	79541634	ENSG00000213513	RP13-39P12.2	thyroid	pseudogene	32	0.075765	0.000191692	-1.87	0.0291
12	66517697	66563765	ENSG00000155957	TMBIM4	small_intestine_terminal_ileum	protein_coding	31	0.160384	0.00300899	-2.48	0.0291
19	7598890	7626650	ENSG00000032444	PNPLA6	brain_cerebellum	protein_coding	69	-0.00284102	0.0348251	-2.22	0.0291
15	40820882	40857256	ENSG00000128891	C15orf57	spleen	protein_coding	47	0.358624	2.28061e-11	3.93	0.0289
1	218458629	218511325	ENSG00000067533	RRP15	esophagus_mucosa	protein_coding	19	0.275243	1.69034e-25	1.63	0.0288
19	6426048	6433790	ENSG00000181240	SLC25A41	minor_salivary_gland	protein_coding	69	0.506438	2.94061e-09	2.74	0.0288
15	40820882	40857256	ENSG00000128891	C15orf57	testis	protein_coding	47	0.36558	1.1542e-20	3.38	0.0287
1	231762561	232177018	ENSG00000162946	DISC1	esophagus_mucosa	protein_coding	15	0.00669338	0.114614	-1.99	0.0285
7	124462440	124570037	ENSG00000128513	POT1	breast_mammary_tissue	protein_coding	20	0.0348207	0.00918942	-0.243	0.0281
15	40820882	40857256	C15orf57	C15orf57	adipose	NA	47	0.25252	1.63677e-37	4.48	0.028
8	133879203	134147147	ENSG00000042832	TG	adipose	protein_coding	19	0.273328	5.80943e-41	1.38	0.028
5	1008944	1039058	ENSG00000145506	NKD2	brain_frontal_cortex_ba9	protein_coding	36	0.0862292	0.000779216	4.2	0.0278
1	233119181	233431459	ENSG00000135749	PCNXL2	adipose_visceral_omentum	protein_coding	15	0.0275477	0.00695016	-2	0.0276
1	241753404	241840678	ENSG00000054277	OPN3	pancreas	protein_coding	36	0.105831	2.47997e-06	-2.16	0.0276
1	218458629	218511325	ENSG00000067533	RRP15	heart_atrial_appendage	protein_coding	19	0.0805377	5.67961e-05	1.91	0.0275
10	105253736	105352309	ENSG00000107954	NEURL	artery_tibial	protein_coding	63	0.0741606	1.19779e-05	2.18	0.027
3	169539710	169555563	ENSG00000188306	LRRIQ4	cells_transformed_fibroblasts	protein_coding	50	0.0407559	0.0039422	-5.81	0.0268
8	134241299	134241940	ENSG00000104415	WISP1	brain_nucleus_accumbens_basal_ganglia	protein_coding	19	-0.0248419	0.101596	-1.45	0.0268
1	218458629	218511325	ENSG00000067533	RRP15	colon_sigmoid	protein_coding	19	0.0898963	3.72391e-05	1.55	0.0267
3	171318195	171528740	ENSG00000075651	PLD1	adipose_subcutaneous	protein_coding	50	0.174488	7.74428e-14	-2.13	0.0266
7	124791380	124793665	ENSG00000224899	RP11-3B12.5	nerve_tibial	lincRNA	20	0.0171448	0.0051838	1.33	0.0266
1	59543794	59543794	ENSG00000185839.2	RP4-592A1.2	cells_transformed_fibroblasts	pseudogene	15	0.0250112	0.157201	-1.68	0.0265
1	218458629	218511325	ENSG00000067533	RRP15	thyroid	protein_coding	19	0.14085	3.72919e-11	1.62	0.0265
1	218458629	218511325	ENSG00000067533	RRP15	nerve_tibial	protein_coding	19	0.211637	7.04801e-13	1.58	0.0265
15	40820882	40857256	ENSG00000128891	C15orf57	prostate	protein_coding	47	0.507558	5.80829e-17	3.68	0.0265
15	40820882	40857256	ENSG00000128891	C15orf57	skin_sun_exposed_lower_leg	protein_coding	47	0.50632	9.11817e-53	3.16	0.0265
15	40820882	40857256	ENSG00000128891	C15orf57	esophagus_gastroesophageal_junction	protein_coding	47	0.419332	9.88719e-21	3.63	0.0261
1	60103095	60103095	ENSG00000231816.1	RP4-782L23.1	esophagus_muscularis	lincRNA	15	0.0177194	0.00203307	-0.294	0.026
1	218458629	218511325	ENSG00000067533	RRP15	heart_left_ventricle	protein_coding	19	0.158542	2.48986e-09	1.75	0.026
3	169511216	169530774	ENSG00000171757	LRRC34	cells_transformed_fibroblasts	protein_coding	50	0.114331	7.12997e-07	5.83	0.0259
1	59762310	60233347	ENSG00000172456	FGGY	skin_not_sun_exposed_suprapubic	protein_coding	15	0.0860584	6.06726e-08	-1.79	0.0258
1	216676588	217311097	ENSG00000196482	ESRRG	colon_transverse	protein_coding	19	0.0528962	0.262629	-1.43	0.0255
15	40820882	40857256	ENSG00000128891	C15orf57	lung	protein_coding	47	0.469425	4.87379e-48	3.84	0.0255
5	473425	524447	ENSG00000066230	SLC9A3	artery_coronary	protein_coding	36	0.190802	0.000243434	-7	0.0255
8	134249414	134314265	ENSG00000104419	NDRG1	brain_spinal_cord_cervical_c-1	protein_coding	19	0.0146852	0.0724074	-1.35	0.0255
1	218458629	218511325	ENSG00000067533	RRP15	brain_anterior_cingulate_cortex_ba24	protein_coding	19	0.0764979	0.000112812	1.81	0.0254
1	231762561	232177018	ENSG00000162946	DISC1	ovary	protein_coding	15	0.0914254	0.00237114	2.03	0.0254
3	169804520	169899537	ENSG00000173889	PHC3	stomach	protein_coding	50	0.0742818	0.000447153	-1.29	0.0254
1	59762310	60233347	ENSG00000172456	FGGY	lung	protein_coding	15	0.105154	1.11055e-08	-1.71	0.0253
19	6361463	6368919	ENSG00000125656	CLPP	nerve_tibial	protein_coding	69	0.0464637	0.0214498	-0.473	0.0253
12	66517697	66563765	ENSG00000155957	TMBIM4	artery_aorta	protein_coding	31	0.0354611	0.000870957	-2.26	0.0252
7	124462439	124570037	ENSG00000128513	POT1	brain_dorsolateral_prefrontal_cortex	protein_coding	20	0.172244	1.82535e-20	0.741	0.0251
15	41099284	41106767	ENSG00000166140	ZFYVE19	lung	protein_coding	47	0.146954	5.77016e-11	-4.94	0.025
12	66582658	66648402	ENSG00000090376	IRAK3	blood	protein_coding	31	0.0132982	2.69784e-05	-2.37	0.0249
7	124462440	124570037	ENSG00000128513	POT1	skin_sun_exposed_lower_leg	protein_coding	20	0.03089	0.000693746	2.72	0.0249
1	218458629	218511325	ENSG00000067533	RRP15	esophagus_muscularis	protein_coding	19	0.191076	3.14702e-14	1.66	0.0248
12	67663061	67713731	ENSG00000111530	CAND1	adipose_subcutaneous	protein_coding	31	0.105683	6.90235e-10	-2.1	0.0247
12	67663061	67713731	ENSG00000111530	CAND1	skin_sun_exposed_lower_leg	protein_coding	31	0.142545	1.90213e-13	-2.1	0.0247
15	67493371	67547533	ENSG00000103591	AAGAB	minor_salivary_gland	protein_coding	30	0.0521934	0.0125498	-2.88	0.0247
16	79710005	79841819	ENSG00000260876	RP11-345M22.1	esophagus_mucosa	lincRNA	19	0.0748706	2.79531e-07	2.13	0.0247
5	111695183	111695183	ENSG00000268358.1	EPB41L4A-AS2	esophagus_mucosa	protein_coding	20	0.00582263	0.0409422	3.19	0.0244
1	59762310	60233347	ENSG00000172456	FGGY	brain_cerebellar_hemisphere	protein_coding	15	0.279367	8.83386e-07	-1.74	0.0243
15	40820882	40857256	ENSG00000128891	C15orf57	heart_left_ventricle	protein_coding	47	0.411561	2.13887e-28	3.58	0.0242
1	218458629	218511325	ENSG00000067533	RRP15	vagina	protein_coding	19	0.119704	0.00462333	1.78	0.0241
8	132916355	133025886	ENSG00000132294	EFR3A	brain_dorsolateral_prefrontal_cortex	protein_coding	19	0.0711585	5.02721e-09	1.34	0.0241
15	40820882	40857256	ENSG00000128891	C15orf57	esophagus_muscularis	protein_coding	47	0.594656	5.18175e-56	3.33	0.024
5	112357796	112824527	ENSG00000171444	MCC	heart_atrial_appendage	protein_coding	20	0.0862423	0.00022109	-2.67	0.024
3	169511215	169530574	ENSG00000171757	LRRC34	brain_dorsolateral_prefrontal_cortex	protein_coding	50	0.0808465	4.47926e-10	5.77	0.0239
7	124800028	124800601	ENSG00000205898	RP11-3B12.4	thyroid	pseudogene	20	0.0235087	0.00943701	-2.21	0.0239
16	7.96991e+07	7.96991e+07	ENSG00000261390.1	RP11-345M22.2	brain_caudate_basal_ganglia	lincRNA	19	0.00436829	0.245038	-5.22	0.0238
1	233119181	233431459	ENSG00000135749	PCNXL2	brain_cerebellar_hemisphere	protein_coding	15	0.0398599	0.170259	-1.89	0.0237
8	133787618	133861052	ENSG00000129292	PHF20L1	adipose_subcutaneous	protein_coding	19	0.0258471	0.000199152	1.28	0.0234
1	59762310	60233347	ENSG00000172456	FGGY	brain_hippocampus	protein_coding	15	0.0984536	0.00701687	-1.73	0.0233
8	133133108	133493200	ENSG00000184156	KCNQ3	artery_aorta	protein_coding	19	0.241485	1.16515e-09	1.28	0.0233
1	59522315	59553867	ENSG00000237352	RP11-145M4.3	muscle_skeletal	lincRNA	15	0.0362133	1.60502e-05	-1.55	0.0231
1	218458629	218511325	ENSG00000067533	RRP15	adrenal_gland	protein_coding	19	0.329605	9.46898e-14	1.44	0.023
1	59745899	59745899	ENSG00000231816.1	RP4-782L23.1	artery_aorta	lincRNA	15	0.0422312	0.00436738	1.79	0.0229
8	32853696	32902373	ENSG00000247134	RP11-11N9.4	whole_blood	lincRNA	10	-0.00181926	0.134025	-0.918	0.0229
1	60328613	60328613	ENSG00000231816.1	RP4-782L23.1	skin_not_sun_exposed_suprapubic	lincRNA	15	0.0110559	0.0259608	1.8	0.0228
5	112312399	112356667	ENSG00000172795	DCP2	colon_sigmoid	protein_coding	20	0.132817	1.25369e-05	-3.85	0.0228
6	44777054	45345690	ENSG00000196284	SUPT3H	adrenal_gland	protein_coding	32	0.0973689	0.0214059	-2.62	0.0228
1	218458629	218511325	ENSG00000067533	RRP15	brain_cortex	protein_coding	19	0.114765	0.0110159	1.5	0.0225
7	124386051	124405681	ENSG00000170775	GPR37	adipose_subcutaneous	protein_coding	20	0.0543484	0.0011553	-1.85	0.0223
10	79550549	79686378	ENSG00000151208	DLG5	esophagus_gastroesophageal_junction	protein_coding	32	0.192211	6.22043e-10	1.77	0.0222
15	40986972	41024354	ENSG00000051180	RAD51	esophagus_mucosa	protein_coding	47	0.025264	0.0260967	4.24	0.0222
1	218458629	218511325	ENSG00000067533	RRP15	prostate	protein_coding	19	0.102172	0.00318774	1.05	0.0221
7	124462440	124570037	ENSG00000128513	POT1	adipose_subcutaneous	protein_coding	20	0.0310371	0.00256559	-1.6	0.0221
12	66627859	66629014	ENSG00000225422	RBMS1P1	adipose_visceral_omentum	pseudogene	31	0.0139255	0.14335	2.35	0.022
15	40820882	40857256	ENSG00000128891	C15orf57	nerve_tibial	protein_coding	47	0.554262	2.16843e-53	3.64	0.022
16	78133310	79246564	ENSG00000186153	WWOX	artery_coronary	protein_coding	19	0.103427	0.150107	1.4	0.022
10	79550549	79686378	ENSG00000151208	DLG5	brain_cortex	protein_coding	32	0.126946	0.00935047	-1.86	0.0219
10	77360998	78319925	C10orf11	C10orf11	adipose	NA	32	0.0995748	1.11398e-14	1.82	0.0219
12	66516842	66524548	ENSG00000139233	LLPH	skin_sun_exposed_lower_leg	protein_coding	31	0.0283434	0.00424332	1.97	0.0219
15	40820882	40857256	ENSG00000128891	C15orf57	esophagus_mucosa	protein_coding	47	0.509213	6.55467e-46	3.99	0.0219
16	80631803	80838226	ENSG00000166446	CDYL2	heart_left_ventricle	protein_coding	19	0.0216458	0.0368169	-1.82	0.0219
1	232533711	232697304	ENSG00000116991	SIPA1L2	ovary	protein_coding	15	0.151741	0.210494	1.73	0.0218
12	65672423	65882024	ENSG00000174099	MSRB3	esophagus_gastroesophageal_junction	protein_coding	31	0.0144817	0.0933245	-2.02	0.0218
1	60213519	60213519	ENSG00000231816.1	RP4-782L23.1	brain_hypothalamus	lincRNA	15	0.0993467	0.00292295	1.7	0.0217
7	124673507	124675355	ENSG00000186676	EEF1GP1	artery_aorta	pseudogene	20	0.0366327	0.00511201	-1.65	0.0217
8	134420249	134421471	ENSG00000225259	ST13P6	brain_hypothalamus	pseudogene	19	-0.0161686	0.209834	-1.12	0.0217
16	80631803	80838226	ENSG00000166446	CDYL2	nerve_tibial	protein_coding	19	0.0464892	0.000596032	3.12	0.0216
1	60222380	60222380	ENSG00000231816.1	RP4-782L23.1	pancreas	lincRNA	15	0.0370305	0.0161688	1.68	0.0215
8	133584320	133687838	ENSG00000129295	LRRC6	heart_atrial_appendage	protein_coding	19	0.036695	0.000645342	-1.18	0.0215
1	243419320	243663394	ENSG00000054282	SDCCAG8	adipose_visceral_omentum	protein_coding	36	0.140149	9.38189e-10	6.34	0.0214
1	60425118	60425118	ENSG00000231816.1	RP4-782L23.1	lung	lincRNA	15	0.219928	1.91385e-17	1.66	0.0213
16	70514471	70557468	ENSG00000103051	COG4	brain_nucleus_accumbens_basal_ganglia	protein_coding	59	0.0396259	0.000302089	1.7	0.0212
5	112357796	112824527	ENSG00000171444	MCC	artery_tibial	protein_coding	20	0.0174739	0.00429762	-2.92	0.0211
10	79540095	79541634	ENSG00000213513	RP13-39P12.2	skin_sun_exposed_lower_leg	pseudogene	32	0.0788435	8.45548e-08	1.67	0.021
1	59278480	59279014	ENSG00000272226	RP11-63G10.3	cells_transformed_fibroblasts	lincRNA	15	0.027973	0.0343742	1.62	0.0209
1	218458629	218511325	ENSG00000067533	RRP15	brain_substantia_nigra	protein_coding	19	0.289092	0.000399113	0.025	0.0209
1	219347186	219386207	ENSG00000143353	LYPLAL1	ovary	protein_coding	19	0.10383	0.0130105	-1	0.0207
1	233086351	233119628	ENSG00000135778	NTPCR	colon_transverse	protein_coding	15	0.304487	1.87328e-18	0.168	0.0207
7	126986844	127071978	ENSG00000048405	ZNF800	testis	protein_coding	20	0.0521372	0.00292622	1.41	0.0207
15	40820882	40857256	ENSG00000128891	C15orf57	artery_tibial	protein_coding	47	0.484452	3.17936e-47	3.44	0.0206
15	40820882	40857256	ENSG00000128891	C15orf57	adrenal_gland	protein_coding	47	0.485656	7.86772e-24	3.85	0.0206
19	22573821	22715287	ENSG00000197360	ZNF98	heart_atrial_appendage	protein_coding	77	0.27413	1.42725e-16	1.92	0.0206
1	218458629	218511325	ENSG00000067533	RRP15	cells_transformed_fibroblasts	protein_coding	19	0.313621	9.15595e-23	1.29	0.0205
12	66582659	66648402	ENSG00000090376	IRAK3	skin_not_sun_exposed_suprapubic	protein_coding	31	0.0496315	0.00228196	2.28	0.0205
5	480948	480948	ENSG00000221990.2	C5orf55	small_intestine_terminal_ileum	protein_coding	36	0.0414369	0.0219961	-2.52	0.0205
5	112357796	112824527	ENSG00000171444	MCC	thyroid	protein_coding	20	0.0606463	4.58018e-07	-4.1	0.0205
1	218458629	218511325	ENSG00000067533	RRP15	spleen	protein_coding	19	0.105981	0.0579363	1.08	0.0204
1	232533711	232766437	ENSG00000116991	SIPA1L2	blood	protein_coding	15	0.0287112	1.08492e-09	-1.79	0.0203
10	104221149	104236802	ENSG00000138111	TMEM180	testis	protein_coding	63	0.238196	3.90924e-12	2.15	0.0203
5	112357796	112824527	ENSG00000171444	MCC	whole_blood	protein_coding	20	0.203016	5.534e-19	2.43	0.0203
7	124385654	124406079	ENSG00000170775	GPR37	brain_dorsolateral_prefrontal_cortex	protein_coding	20	0.0612917	5.8001e-08	2.6	0.0203
1	59762310	60233347	ENSG00000172456	FGGY	esophagus_gastroesophageal_junction	protein_coding	15	0.0110527	0.0440178	-1.58	0.0201
1	61125303	61291256	ENSG00000231252	RP11-436K8.1	muscle_skeletal	lincRNA	15	0.0067894	0.00373247	1.6	0.0201
10	78629359	79398353	ENSG00000156113	KCNMA1	brain_substantia_nigra	protein_coding	32	0.10576	0.183166	0.189	0.0201
12	65672423	65882024	ENSG00000174099	MSRB3	artery_tibial	protein_coding	31	-0.000968242	0.028225	-2.38	0.0201
16	78133310	79246564	ENSG00000186153	WWOX	brain_hypothalamus	protein_coding	19	0.0214174	0.00156221	-2.19	0.0201
1	216676588	217311097	ENSG00000196482	ESRRG	esophagus_muscularis	protein_coding	19	3.35134e-05	0.246214	-1.28	0.02
1	233749750	233808258	ENSG00000135750	KCNK1	spleen	protein_coding	15	0.0617567	0.00469259	1.7	0.02
15	40820882	40857256	ENSG00000128891	C15orf57	cells_transformed_fibroblasts	protein_coding	47	0.537323	5.13435e-45	3.93	0.02
15	40820882	40857256	ENSG00000128891	C15orf57	pancreas	protein_coding	47	0.581917	1.92772e-34	3.15	0.02
19	6426048	6433790	ENSG00000181240	SLC25A41	esophagus_mucosa	protein_coding	69	0.567433	1.09887e-56	4.45	0.02
1	59762310	60233347	ENSG00000172456	FGGY	adrenal_gland	protein_coding	15	0.0430324	0.0893384	-1.6	0.0198
1	243287730	243418650	ENSG00000143702	CEP170	breast_mammary_tissue	protein_coding	36	0.121977	1.07839e-06	3.58	0.0197
8	134048973	134115298	ENSG00000155926	SLA	nerve_tibial	protein_coding	19	0.0181009	0.00435858	1.07	0.0196
1	62146718	62191095	ENSG00000162604	TM2D1	heart_left_ventricle	protein_coding	15	0.0144265	0.0585396	1.57	0.0195
1	218458629	218511325	ENSG00000067533	RRP15	pancreas	protein_coding	19	0.0866492	7.92545e-05	1.47	0.0194
1	218458629	218511325	ENSG00000067533	RRP15	stomach	protein_coding	19	0.17598	9.36349e-07	0.475	0.0194
7	124462440	124570037	ENSG00000128513	POT1	heart_atrial_appendage	protein_coding	20	0.0883631	0.00106153	1.62	0.0194
1	59762310	60233347	ENSG00000172456	FGGY	nerve_tibial	protein_coding	15	0.0876836	6.64761e-07	-1.56	0.0193
1	232533711	232697304	ENSG00000116991	SIPA1L2	cells_transformed_fibroblasts	protein_coding	15	0.0402504	0.00181915	1.8	0.0193
15	40820882	40857256	ENSG00000128891	C15orf57	cells_ebv-transformed_lymphocytes	protein_coding	47	0.38923	2.88412e-10	3.45	0.0193
1	218519577	218617961	ENSG00000092969	TGFB2	thyroid	protein_coding	19	0.119189	2.81126e-07	1.03	0.0192
16	7.96517e+07	7.96517e+07	ENSG00000261390.1	RP11-345M22.2	pituitary	lincRNA	19	0.153949	0.00015983	-5.55	0.0192
1	60280458	60342050	ENSG00000134709	HOOK1	esophagus_muscularis	protein_coding	15	0.0567649	0.00128393	1.66	0.0191
12	66530716	66563807	ENSG00000155957	TMBIM4	brain_dorsolateral_prefrontal_cortex	protein_coding	31	0.251928	1.95234e-30	-2.19	0.019
12	66517697	66563765	ENSG00000155957	TMBIM4	testis	protein_coding	31	0.42834	1.31187e-24	2.1	0.0189
1	59559189	59559189	ENSG00000231816.1	RP4-782L23.1	esophagus_gastroesophageal_junction	lincRNA	15	0.0192982	0.212709	1.6	0.0187
15	40331512	40359491	ENSG00000248508	SRP14-AS1	esophagus_muscularis	lincRNA	47	0.445253	3.13475e-34	-2.91	0.0187
1	59762310	60233347	ENSG00000172456	FGGY	uterus	protein_coding	15	0.0665787	0.00146049	-1.56	0.0186
1	218458629	218511325	ENSG00000067533	RRP15	adipose_visceral_omentum	protein_coding	19	0.219553	2.12676e-10	1.2	0.0182
1	233086351	233119628	ENSG00000135778	NTPCR	esophagus_mucosa	protein_coding	15	0.446865	1.14302e-42	0.278	0.0182
1	231376953	231413719	ENSG00000116906	GNPAT	colon_sigmoid	protein_coding	15	0.179615	3.44898e-06	1.68	0.0182
15	40820882	40857256	ENSG00000128891	C15orf57	artery_coronary	protein_coding	47	0.351488	3.91201e-11	3.15	0.0182
9	19375713	19380252	ENSG00000137154	RPS6	heart_atrial_appendage	protein_coding	30	0.0510346	0.00102021	2	0.0182
1	60210649	60210649	ENSG00000231816.1	RP4-782L23.1	liver	lincRNA	15	0.0767996	0.0068328	1.52	0.0181
16	78133310	79246564	ENSG00000186153	WWOX	adrenal_gland	protein_coding	19	-0.0924502	0.105919	1.31	0.0181
18	596988	650334	ENSG00000079101	CLUL1	skin_not_sun_exposed_suprapubic	protein_coding	35	0.0463085	0.0111957	1.3	0.018
19	22640131	22641014	ENSG00000268717	AC025811.1	pancreas	pseudogene	77	0.0437269	0.0128816	-5	0.018
15	66628544	66679084	ENSG00000075131	TIPIN	heart_left_ventricle	protein_coding	30	0.286657	1.63713e-17	0.563	0.0179
1	59485823	59485823	ENSG00000230812.1	RP4-794H19.4	artery_tibial	lincRNA	15	0.0110956	0.108903	-1.46	0.0178
1	59762310	60233347	ENSG00000172456	FGGY	small_intestine_terminal_ileum	protein_coding	15	0.00491612	0.192494	-1.46	0.0178
16	79731548	79731548	ENSG00000261390.1	RP11-345M22.2	nerve_tibial	lincRNA	19	0.149202	2.29984e-13	-5.78	0.0178
8	33228342	33330940	ENSG00000172728	FUT10	breast_mammary_tissue	protein_coding	10	0.205444	3.52698e-11	-1.79	0.0176
16	79742441	79742441	ENSG00000261390.1	RP11-345M22.2	ovary	lincRNA	19	0.0998728	0.0344808	-5.79	0.0175
1	6.04473e+07	6.04473e+07	ENSG00000231816.1	RP4-782L23.1	pituitary	lincRNA	15	0.13796	0.0284373	1.53	0.0173
3	170582664	170588272	ENSG00000163584	RPL22L1	ovary	protein_coding	50	0.0588993	0.121447	1.93	0.0173
12	66517697	66563765	ENSG00000155957	TMBIM4	adipose_subcutaneous	protein_coding	31	0.327539	1.91046e-28	-2.14	0.0172
10	79550549	79686378	ENSG00000151208	DLG5	vagina	protein_coding	32	0.113478	0.0003311	-1.75	0.0171
12	65563351	65642107	ENSG00000174106	LEMD3	brain_cerebellar_hemisphere	protein_coding	31	0.0638968	0.0170098	-2.09	0.0171
7	124386051	124405681	ENSG00000170775	GPR37	adrenal_gland	protein_coding	20	0.110403	0.00107084	0.11	0.017
1	59762310	60233347	ENSG00000172456	FGGY	muscle_skeletal	protein_coding	15	0.0510386	5.66223e-06	-1.44	0.0169
1	62208149	62629592	ENSG00000132849	INADL	uterus	protein_coding	15	0.0218117	0.126418	1.38	0.0169
1	58881056	59012474	ENSG00000162600	OMA1	brain_putamen_basal_ganglia	protein_coding	15	0.131111	8.03054e-05	1.29	0.0169
1	218458629	218511325	ENSG00000067533	RRP15	minor_salivary_gland	protein_coding	19	0.217945	4.9984e-05	1.51	0.0169
15	40820882	40857256	ENSG00000128891	C15orf57	adipose_visceral_omentum	protein_coding	47	0.450515	2.6445e-34	3.31	0.0169
3	169511216	169530774	ENSG00000171757	LRRC34	brain_cerebellum	protein_coding	50	0.0621027	0.00199992	5.71	0.0169
3	171318195	171528740	ENSG00000075651	PLD1	brain_substantia_nigra	protein_coding	50	0.129186	0.078478	-2.24	0.0169
1	59486059	59510286	RP4-794H19.4	RP4-794H19.4	adipose	NA	15	0.018263	0.000770545	-1.36	0.0168
1	233086351	233119628	ENSG00000135778	NTPCR	brain_putamen_basal_ganglia	protein_coding	15	0.423292	1.54596e-11	-0.301	0.0168
15	66585555	66626236	ENSG00000166938	DIS3L	pituitary	protein_coding	30	0.200471	5.87606e-07	1.74	0.0168
16	78133310	79246564	ENSG00000186153	WWOX	brain_frontal_cortex_ba9	protein_coding	19	0.0428271	0.000611342	1.24	0.0168
19	8386042	8388224	ENSG00000233927	RPS28	artery_coronary	protein_coding	69	0.26558	2.56438e-08	-2.38	0.0168
1	59762310	60233347	ENSG00000172456	FGGY	brain_substantia_nigra	protein_coding	15	-0.109359	0.0270438	-1.55	0.0167
1	59041099	59043166	ENSG00000184292	TACSTD2	artery_coronary	protein_coding	15	0.0302588	0.0151725	-1.26	0.0167
1	218458629	218511325	ENSG00000067533	RRP15	whole_blood	protein_coding	19	0.0250662	0.0200268	1.47	0.0167
12	66517697	66563765	ENSG00000155957	TMBIM4	heart_atrial_appendage	protein_coding	31	0.0727456	7.28166e-06	-1.71	0.0167
5	896983	896983	ENSG00000221990.2	C5orf55	vagina	protein_coding	36	-0.045333	0.0316685	-2.76	0.0167
1	59762310	60233347	ENSG00000172456	FGGY	brain_cerebellum	protein_coding	15	0.180355	2.65388e-06	-1.42	0.0166
1	233086351	233119628	ENSG00000135778	NTPCR	brain_spinal_cord_cervical_c-1	protein_coding	15	0.234936	2.49408e-05	-0.494	0.0166
10	77360998	78319925	ENSG00000148655	C10orf11	brain_cortex	protein_coding	32	0.349736	3.36586e-10	1.69	0.0164
16	79742317	79742317	ENSG00000261390.1	RP11-345M22.2	lung	lincRNA	19	0.169339	5.60909e-12	-5.79	0.0164
3	169539710	169555563	ENSG00000188306	LRRIQ4	testis	protein_coding	50	0.0485854	0.000793194	-5.68	0.0164
1	5.96582e+07	5.96582e+07	ENSG00000231816.1	RP4-782L23.1	colon_transverse	lincRNA	15	0.0558678	0.00226493	1.37	0.0163
12	66741211	67197966	ENSG00000155974	GRIP1	small_intestine_terminal_ileum	protein_coding	31	0.0597769	0.0635231	1.02	0.0163
15	68871308	69020145	ENSG00000103647	CORO2B	brain_hypothalamus	protein_coding	30	-0.102331	0.0209275	1.58	0.0163
15	68112042	68126899	ENSG00000188779	SKOR1	brain_cerebellum	protein_coding	30	0.0119485	0.154113	1.7	0.0162
16	79661497	79661497	ENSG00000261390.1	RP11-345M22.2	adrenal_gland	lincRNA	19	0.416543	1.92701e-17	-5.45	0.0162
16	7.9749e+07	7.9749e+07	ENSG00000261390.1	RP11-345M22.2	colon_sigmoid	lincRNA	19	0.14097	9.72341e-07	-5.77	0.0162
3	169511216	169530774	ENSG00000171757	LRRC34	stomach	protein_coding	50	0.0453106	0.00269805	5.6	0.0162
8	133697253	133772958	ENSG00000165071	TMEM71	blood	protein_coding	19	0.281271	9.39314e-93	-0.915	0.0162
9	18473892	18910948	ENSG00000178031	ADAMTSL1	artery_tibial	protein_coding	30	0.0591216	0.0372281	1.92	0.0162
15	69571014	69587661	ENSG00000259504	RP11-352D13.5	esophagus_mucosa	lincRNA	30	0.00772582	0.342214	-1.98	0.0161
7	124386051	124405681	ENSG00000170775	GPR37	liver	protein_coding	20	0.107635	2.50415e-06	-0.871	0.0161
1	217600334	217804424	ENSG00000092978	GPATCH2	testis	protein_coding	19	0.059643	0.0032434	0.803	0.016
8	133133108	133493200	ENSG00000184156	KCNQ3	artery_tibial	protein_coding	19	0.262912	4.79226e-22	0.843	0.016
1	59762310	60233347	ENSG00000172456	FGGY	colon_transverse	protein_coding	15	0.027441	0.00090319	-1.39	0.0159
16	81069452	81080963	ENSG00000166454	ATMIN	thyroid	protein_coding	19	0.0789338	5.92971e-08	0.798	0.0159
5	111478138	111755013	ENSG00000129595	EPB41L4A	brain_spinal_cord_cervical_c-1	protein_coding	20	0.252677	0.000208706	-3.55	0.0159
8	132916335	133025889	ENSG00000132294	EFR3A	small_intestine_terminal_ileum	protein_coding	19	0.0420872	0.0623147	-0.93	0.0159
16	71928322	71962906	KIAA0174	KIAA0174	blood	NA	59	0.0142421	1.44564e-05	-0.177	0.0158
19	8959520	9092018	ENSG00000181143	MUC16	breast_mammary_tissue	protein_coding	69	0.0883214	9.93191e-07	2.69	0.0158
15	40820882	40857256	ENSG00000128891	C15orf57	breast_mammary_tissue	protein_coding	47	0.445511	1.13614e-25	3.31	0.0157
9	19507449	19787017	ENSG00000155886	SLC24A2	brain_dorsolateral_prefrontal_cortex	protein_coding	30	0.0404445	9.77161e-06	2.07	0.0157
1	6.02152e+07	6.02152e+07	ENSG00000231816.1	RP4-782L23.1	nerve_tibial	lincRNA	15	0.0513579	2.27233e-06	1.37	0.0156
1	215740735	215795149	ENSG00000136636	KCTD3	artery_tibial	protein_coding	19	0.00555848	0.218877	-1.09	0.0156
16	71671738	71758604	ENSG00000040199	PHLPP2	whole_blood	protein_coding	59	0.0370064	0.00110669	-1.23	0.0156
15	40820882	40857256	ENSG00000128891	C15orf57	heart_atrial_appendage	protein_coding	47	0.420739	1.03522e-23	3.13	0.0155
8	133879204	134147143	ENSG00000042832	TG	brain_dorsolateral_prefrontal_cortex	protein_coding	19	0.0904192	4.03254e-11	0.742	0.0155
8	133133108	133493200	ENSG00000184156	KCNQ3	adipose	protein_coding	19	0.00801338	0.019019	-0.551	0.0155
1	59120411	59165764	ENSG00000162601	MYSM1	skin_sun_exposed_lower_leg	protein_coding	15	0.0176383	0.148513	1.15	0.0154
1	59762310	60233347	ENSG00000172456	FGGY	adipose_visceral_omentum	protein_coding	15	0.0259482	0.00887556	-1.37	0.0154
1	217600334	217804424	ENSG00000092978	GPATCH2	brain_substantia_nigra	protein_coding	19	0.124426	0.0745988	1.04	0.0154
15	40763160	40765353	ENSG00000169105	CHST14	blood	protein_coding	47	0.0191831	4.62444e-07	-5.25	0.0153
16	79709247	79709247	ENSG00000261390.1	RP11-345M22.2	breast_mammary_tissue	lincRNA	19	0.119525	3.33291e-06	-5.8	0.0153
8	133787618	133861052	ENSG00000129292	PHF20L1	esophagus_muscularis	protein_coding	19	0.0282032	0.0035163	0.623	0.0152
8	134241299	134241940	ENSG00000104415	WISP1	heart_left_ventricle	protein_coding	19	0.172363	1.95286e-09	-0.851	0.0152
1	60280458	60342050	ENSG00000134709	HOOK1	muscle_skeletal	protein_coding	15	0.020665	0.0240923	1.33	0.0151
1	59762310	60233347	ENSG00000172456	FGGY	testis	protein_coding	15	0.0230981	0.0380164	-0.307	0.0151
12	65270216	65270216	ENSG00000255693.1	RP11-766N7.3	pituitary	lincRNA	31	0.287515	2.27558e-10	-2.04	0.0151
15	66628544	66679084	ENSG00000075131	TIPIN	esophagus_gastroesophageal_junction	protein_coding	30	0.268143	1.84306e-10	1.99	0.0151
18	194692	194692	ENSG00000263305.1	AP005530.2	thyroid	lincRNA	35	0.0042149	0.13735	-3.08	0.0151
1	233463514	233520894	ENSG00000143674	MLK4	brain_cerebellar_hemisphere	protein_coding	15	0.106981	0.00149725	-1.58	0.015
7	123670973	123673523	ENSG00000234224	TMEM229A	brain_hypothalamus	protein_coding	20	0.129885	0.163587	0.558	0.015
9	20658308	20995954	ENSG00000188352	FOCAD	brain_frontal_cortex_ba9	protein_coding	30	0.115355	0.00272011	-2.01	0.015
5	1798500	1801480	ENSG00000171421	MRPL36	brain_putamen_basal_ganglia	protein_coding	36	0.13194	0.000567138	-2.97	0.0149
1	219347186	219386207	ENSG00000143353	LYPLAL1	heart_left_ventricle	protein_coding	19	0.0479163	0.264643	-1.17	0.0148
12	66582659	66648402	ENSG00000090376	IRAK3	breast_mammary_tissue	protein_coding	31	0.0119974	0.0686915	2.08	0.0148
8	134467091	134584183	ENSG00000008513	ST3GAL1	colon_sigmoid	protein_coding	19	-0.0283342	0.0248293	-0.741	0.0147
1	59762310	60233347	ENSG00000172456	FGGY	brain_spinal_cord_cervical_c-1	protein_coding	15	0.0312822	0.101154	-1.44	0.0146
16	79710005	79841819	ENSG00000260876	RP11-345M22.1	nerve_tibial	lincRNA	19	0.0968698	2.48292e-06	0.708	0.0146
1	218458629	218511325	ENSG00000067533	RRP15	brain_nucleus_accumbens_basal_ganglia	protein_coding	19	0.230885	0.000119296	1.12	0.0145
1	233119181	233431459	ENSG00000135749	PCNXL2	skin_not_sun_exposed_suprapubic	protein_coding	15	0.0464026	2.9854e-05	1.56	0.0145
10	79540095	79541634	ENSG00000213513	RP13-39P12.2	spleen	pseudogene	32	0.078686	0.0843956	-1.52	0.0145
12	66517697	66563852	ENSG00000155957	TMBIM4	blood	protein_coding	31	0.141413	6.41544e-44	1.78	0.0145
19	22235254	22274282	ENSG00000197134	ZNF257	colon_transverse	protein_coding	77	0.319647	4.20432e-18	5.85	0.0145
1	233086351	233119628	ENSG00000135778	NTPCR	nerve_tibial	protein_coding	15	0.225893	3.60761e-18	1.55	0.0144
16	78133310	79246564	ENSG00000186153	WWOX	liver	protein_coding	19	0.179421	0.000742326	0.772	0.0144
5	112196919	112205485	ENSG00000153037	SRP19	esophagus_mucosa	protein_coding	20	0.0452293	0.0097119	3.51	0.0144
1	60104754	60104754	ENSG00000231816.1	RP4-782L23.1	stomach	lincRNA	15	0.0395648	0.0116042	1.41	0.0143
1	218458629	218511325	ENSG00000067533	RRP15	artery_tibial	protein_coding	19	0.17079	7.59887e-16	1.14	0.0143
6	43573053	43596899	ENSG00000172432	GTPBP2	adipose_visceral_omentum	protein_coding	32	-0.00350535	0.258636	3.61	0.0143
7	127292234	127732661	ENSG00000197157	SND1	heart_atrial_appendage	protein_coding	20	0.0312501	0.0565962	0.829	0.0143
1	243430559	243431421	ENSG00000224727	FCF1P7	skin_sun_exposed_lower_leg	pseudogene	36	-0.000786747	0.152843	-6.51	0.0142
8	134249414	134314265	ENSG00000104419	NDRG1	nerve_tibial	protein_coding	19	0.0367614	1.54805e-05	-0.649	0.0142
8	134338240	134338647	ENSG00000243537	CTC-458A3.1	stomach	pseudogene	19	0.167887	1.3715e-10	-0.235	0.0142
8	134048973	134115298	ENSG00000155926	SLA	skin_not_sun_exposed_suprapubic	protein_coding	19	0.0622102	0.0612053	0.772	0.0142
8	134249414	134314265	ENSG00000104419	NDRG1	colon_sigmoid	protein_coding	19	0.0504892	0.0054213	-0.672	0.0142
1	215179118	215410436	ENSG00000082482	KCNK2	thyroid	protein_coding	19	0.0987428	1.78656e-08	0.886	0.0141
10	77542518	78317126	C10orf11	C10orf11	brain_dorsolateral_prefrontal_cortex	NA	32	0.170086	3.29926e-20	1.61	0.0141
15	40820882	40857256	ENSG00000128891	C15orf57	minor_salivary_gland	protein_coding	47	0.329638	2.07765e-07	2.24	0.0141
18	813275	813757	RP11-672L10.6	RP11-672L10.6	adipose	NA	35	0.00879696	0.0147851	-3.65	0.0141
5	112196919	112205485	ENSG00000153037	SRP19	heart_atrial_appendage	protein_coding	20	0.00311609	0.0168282	3.34	0.0141
1	60221804	60221804	ENSG00000231816.1	RP4-782L23.1	brain_cortex	lincRNA	15	0.0830617	0.000176025	1.28	0.014
8	132916335	133025889	ENSG00000132294	EFR3A	artery_tibial	protein_coding	19	0.0443697	0.00437091	0.737	0.014
10	77360998	78319925	ENSG00000148655	C10orf11	brain_substantia_nigra	protein_coding	32	0.114164	0.0281699	1.41	0.0139
1	231154704	231175992	ENSG00000182118	FAM89A	brain_anterior_cingulate_cortex_ba24	protein_coding	15	0.404082	8.2533e-08	1.53	0.0138
10	79490524	79494527	ENSG00000213514	RP11-428P16.2	artery_aorta	pseudogene	32	0.0459432	0.249895	-1.59	0.0138
5	612404	653666	ENSG00000112877	CEP72	brain_dorsolateral_prefrontal_cortex	protein_coding	36	0.121492	1.40833e-14	2.23	0.0138
1	6.21277e+07	6.21277e+07	ENSG00000223920.2	RP11-430G17.1	testis	pseudogene	15	0.287617	1.26431e-11	1.28	0.0137
1	60213519	60213519	ENSG00000231816.1	RP4-782L23.1	muscle_skeletal	lincRNA	15	0.073506	3.15061e-05	1.39	0.0137
1	232940643	232946092	ENSG00000212916	MAP10	nerve_tibial	protein_coding	15	0.0260156	0.00738084	1.58	0.0137
1	241792155	241799232	ENSG00000203668	CHML	testis	protein_coding	36	0.13622	1.28966e-07	1.52	0.0137
19	6426048	6433790	ENSG00000181240	SLC25A41	esophagus_muscularis	protein_coding	69	0.55947	2.08697e-54	1.55	0.0137
19	22235254	22274282	ENSG00000197134	ZNF257	esophagus_mucosa	protein_coding	77	0.303463	5.20973e-24	5.41	0.0137
5	111478138	111755013	ENSG00000129595	EPB41L4A	muscle_skeletal	protein_coding	20	0.0923351	3.24603e-08	-4.14	0.0137
8	134249414	134314265	ENSG00000104419	NDRG1	artery_tibial	protein_coding	19	0.0291241	0.0500344	0.608	0.0137
9	20995306	21031635	ENSG00000188921	PTPLAD2	adipose_visceral_omentum	protein_coding	30	0.0290233	0.00380246	-1.48	0.0137
1	62146718	62191095	ENSG00000162604	TM2D1	muscle_skeletal	protein_coding	15	0.0801399	2.95231e-08	1.2	0.0136
1	218519577	218617961	ENSG00000092969	TGFB2	artery_aorta	protein_coding	19	0.0270522	0.0332445	-0.683	0.0136
1	242156487	242156984	ENSG00000213026	CFL1P4	testis	pseudogene	36	0.50818	2.80904e-29	-1.86	0.0136
1	243419320	243663394	ENSG00000054282	SDCCAG8	muscle_skeletal	protein_coding	36	0.106432	9.96143e-09	3.12	0.0136
15	40820882	40857256	ENSG00000128891	C15orf57	brain_hypothalamus	protein_coding	47	0.320566	1.5667e-07	2.13	0.0136
16	78133310	79246564	ENSG00000186153	WWOX	skin_sun_exposed_lower_leg	protein_coding	19	0.292026	1.61019e-25	-1.16	0.0136
19	22235254	22274282	ENSG00000197134	ZNF257	brain_frontal_cortex_ba9	protein_coding	77	0.245451	9.3096e-06	4.7	0.0136
3	171318195	171528740	ENSG00000075651	PLD1	spleen	protein_coding	50	0.653352	2.96703e-24	2.08	0.0136
1	62208149	62629592	ENSG00000132849	INADL	brain_hippocampus	protein_coding	15	0.0485584	0.0315966	-1.32	0.0135
1	60358980	60392462	ENSG00000134716	CYP2J2	brain_anterior_cingulate_cortex_ba24	protein_coding	15	0.0657774	0.103404	1.16	0.0135
1	218519577	218617961	ENSG00000092969	TGFB2	esophagus_muscularis	protein_coding	19	0.0077807	0.064863	0.663	0.0135
1	243419320	243663394	ENSG00000054282	SDCCAG8	spleen	protein_coding	36	0.0609697	0.000594669	5.87	0.0135
8	133722190	133772914	ENSG00000165071	TMEM71	blood	protein_coding	19	0.0141296	1.5572e-05	0.54	0.0135
8	133584320	133687838	ENSG00000129295	LRRC6	blood	protein_coding	19	0.629102	4.46532e-274	-0.583	0.0135
1	233086351	233119628	ENSG00000135778	NTPCR	adipose_subcutaneous	protein_coding	15	0.341299	8.0175e-30	0.388	0.0134
18	657604	673578	ENSG00000176890	TYMS	cells_ebv-transformed_lymphocytes	protein_coding	35	0.0949957	0.0172627	3.12	0.0134
5	112357796	112824527	ENSG00000171444	MCC	vagina	protein_coding	20	0.106524	0.0620474	-1.89	0.0134
1	6.02177e+07	6.02177e+07	ENSG00000231816.1	RP4-782L23.1	prostate	lincRNA	15	0.0619586	1.00435e-05	1.25	0.0133
1	218458629	218511325	ENSG00000067533	RRP15	skin_not_sun_exposed_suprapubic	protein_coding	19	0.167175	2.19564e-06	0.747	0.0133
16	79742441	79742441	ENSG00000261390.1	RP11-345M22.2	prostate	lincRNA	19	0.112643	3.07064e-05	-5.47	0.0133
16	79745736	79745736	ENSG00000261390.1	RP11-345M22.2	stomach	lincRNA	19	0.163696	1.04467e-07	-5.46	0.0133
7	124800028	124800601	ENSG00000205898	RP11-3B12.4	lung	pseudogene	20	0.054106	0.0348647	-1.67	0.0133
7	127292234	127732661	ENSG00000197157	SND1	brain_cerebellar_hemisphere	protein_coding	20	0.0390824	0.000272638	0.712	0.0133
8	132916335	133025889	ENSG00000132294	EFR3A	brain_anterior_cingulate_cortex_ba24	protein_coding	19	0.0406713	0.238501	0.534	0.0133
8	133133108	133493200	ENSG00000184156	KCNQ3	heart_atrial_appendage	protein_coding	19	0.0599451	0.0554199	0.553	0.0133
1	60382682	60382682	ENSG00000231816.1	RP4-782L23.1	thyroid	lincRNA	15	0.0594164	0.00538948	1.19	0.0132
1	243419320	243663394	ENSG00000054282	SDCCAG8	liver	protein_coding	36	-0.00824704	0.245915	0.283	0.0132
3	169511216	169530774	ENSG00000171757	LRRC34	heart_left_ventricle	protein_coding	50	0.0789617	1.90678e-05	5.66	0.0132
1	215740735	215795149	ENSG00000136636	KCTD3	cells_ebv-transformed_lymphocytes	protein_coding	19	0.0814324	0.144056	0.756	0.0131
1	233086351	233119628	ENSG00000135778	NTPCR	breast_mammary_tissue	protein_coding	15	0.256642	2.6131e-11	0.193	0.0131
12	66741211	67197966	ENSG00000155974	GRIP1	adipose	protein_coding	31	0.0443377	2.81594e-07	1.63	0.0131
15	66782473	66790151	ENSG00000174446	SNAPC5	brain_putamen_basal_ganglia	protein_coding	30	0.0695381	0.00141376	0.795	0.0131
18	657604	673578	ENSG00000176890	TYMS	esophagus_gastroesophageal_junction	protein_coding	35	0.161126	9.73893e-08	3.38	0.0131
3	169511216	169530774	ENSG00000171757	LRRC34	adipose_visceral_omentum	protein_coding	50	0.0927707	5.18355e-06	3.46	0.0131
8	134249414	134314265	ENSG00000104419	NDRG1	muscle_skeletal	protein_coding	19	0.0126716	0.0427594	-0.671	0.0131
8	133572745	133573726	ENSG00000253521	HPYR1	whole_blood	lincRNA	19	0.0432606	5.45331e-05	-0.42	0.0131
1	233749750	233808258	ENSG00000135750	KCNK1	muscle_skeletal	protein_coding	15	0.11149	7.54382e-09	-1.6	0.013
1	234040679	234460262	ENSG00000183780	SLC35F3	brain_spinal_cord_cervical_c-1	protein_coding	15	0.153796	0.336738	-1.51	0.013
10	79793518	79816570	ENSG00000138326	RPS24	adipose_subcutaneous	protein_coding	32	0.131074	1.34111e-09	1.38	0.013
16	71660064	71676017	ENSG00000140832	MARVELD3	lung	protein_coding	59	0.0626411	2.89603e-05	-1.74	0.013
8	133133108	133493200	ENSG00000184156	KCNQ3	brain_cerebellum	protein_coding	19	0.0722148	0.0999251	-0.333	0.013
12	66517697	66563765	ENSG00000155957	TMBIM4	esophagus_gastroesophageal_junction	protein_coding	31	0.164799	2.59789e-08	-2.1	0.0129
5	443273	472052	ENSG00000180104	EXOC3	muscle_skeletal	protein_coding	36	0.366711	1.56142e-42	3.09	0.0129
9	19375713	19380252	ENSG00000137154	RPS6	stomach	protein_coding	30	0.0273007	0.0290396	2.06	0.0129
1	215740735	215795149	ENSG00000136636	KCTD3	esophagus_mucosa	protein_coding	19	0.158809	3.07913e-12	0.747	0.0128
1	218519577	218617961	ENSG00000092969	TGFB2	brain_nucleus_accumbens_basal_ganglia	protein_coding	19	0.00809876	0.0455436	0.668	0.0128
16	79738917	79738917	ENSG00000261390.1	RP11-345M22.2	artery_coronary	lincRNA	19	0.097191	0.000126281	-4.95	0.0128
16	7.97498e+07	7.97498e+07	ENSG00000261390.1	RP11-345M22.2	minor_salivary_gland	lincRNA	19	0.0117453	0.146133	-5.42	0.0128
6	43274872	43337216	ENSG00000171467	ZNF318	nerve_tibial	protein_coding	32	0.0538405	4.90213e-05	-2.63	0.0128
8	133133108	133493200	ENSG00000184156	KCNQ3	skin_sun_exposed_lower_leg	protein_coding	19	0.0995429	8.08187e-08	-0.424	0.0128
8	132916335	133025889	ENSG00000132294	EFR3A	cells_ebv-transformed_lymphocytes	protein_coding	19	0.079505	0.00954624	0.2	0.0128
9	20658308	20995954	ENSG00000188352	FOCAD	cells_transformed_fibroblasts	protein_coding	30	0.0297435	0.241893	1.85	0.0128
1	219373256	219373909	ENSG00000225920	RIMKLBP2	heart_left_ventricle	pseudogene	19	-0.0130841	0.00630491	-0.503	0.0127
1	233119181	233431459	ENSG00000135749	PCNXL2	artery_tibial	protein_coding	15	0.0521186	0.000866458	1.52	0.0127
7	127292234	127732661	ENSG00000197157	SND1	brain_putamen_basal_ganglia	protein_coding	20	0.123079	0.0961946	0.556	0.0127
8	134241299	134241940	ENSG00000104415	WISP1	nerve_tibial	protein_coding	19	0.08659	0.0021769	-0.174	0.0127
8	133133108	133493200	ENSG00000184156	KCNQ3	cells_transformed_fibroblasts	protein_coding	19	0.0688427	5.71746e-05	-0.457	0.0127
8	134014850	134015320	ENSG00000240237	CTD-2182N23.1	thyroid	pseudogene	19	0.0841102	8.16183e-08	0.247	0.0127
1	216676588	217311097	ENSG00000196482	ESRRG	adrenal_gland	protein_coding	19	0.0918287	0.000247913	0.679	0.0126
10	77360998	78319925	ENSG00000148655	C10orf11	adrenal_gland	protein_coding	32	0.268457	1.35727e-12	-1.43	0.0126
15	67278699	67351591	ENSG00000259347	RP11-798K3.2	testis	lincRNA	30	0.113876	1.88946e-06	1.81	0.0126
16	71481500	71496998	ENSG00000167377	ZNF23	pituitary	protein_coding	59	0.0284046	0.0956805	-2.08	0.0126
16	79710005	79841819	ENSG00000260876	RP11-345M22.1	skin_not_sun_exposed_suprapubic	lincRNA	19	0.605091	1.03319e-57	-0.728	0.0126
16	78133310	79246564	ENSG00000186153	WWOX	small_intestine_terminal_ileum	protein_coding	19	0.0711587	0.336161	1.65	0.0126
16	79742441	79742441	ENSG00000261390.1	RP11-345M22.2	liver	lincRNA	19	0.113858	8.86734e-06	-5.44	0.0126
8	134048973	134115298	ENSG00000155926	SLA	esophagus_mucosa	protein_coding	19	0.0685175	9.46868e-05	-0.189	0.0126
8	133133108	133493200	ENSG00000184156	KCNQ3	esophagus_muscularis	protein_coding	19	-0.00108475	0.0961427	-0.283	0.0125
1	231376953	231413719	ENSG00000116906	GNPAT	artery_aorta	protein_coding	15	0.130982	9.97926e-08	1.45	0.0124
15	66628721	66649200	ENSG00000075131	TIPIN	blood	protein_coding	30	0.00548234	0.00515498	-1.99	0.0124
15	67493371	67547533	ENSG00000103591	AAGAB	artery_tibial	protein_coding	30	0.0380036	0.00236807	-5.17	0.0124
7	124462440	124570037	ENSG00000128513	POT1	nerve_tibial	protein_coding	20	0.0260439	0.122598	1.09	0.0124
8	134467091	134584183	ENSG00000008513	ST3GAL1	liver	protein_coding	19	0.0301421	0.0761454	-0.279	0.0124
1	59120411	59165764	ENSG00000162601	MYSM1	brain_nucleus_accumbens_basal_ganglia	protein_coding	15	0.150884	0.0111941	1.24	0.0123
1	61125303	61291256	ENSG00000231252	RP11-436K8.1	colon_sigmoid	lincRNA	15	0.0755383	0.0225826	-1.26	0.0123
1	59762310	60233347	ENSG00000172456	FGGY	esophagus_mucosa	protein_coding	15	0.0261879	0.00142453	-1.03	0.0123
1	217804666	218045038	ENSG00000162814	SPATA17	testis	protein_coding	19	0.0571083	7.08332e-05	-0.677	0.0123
16	70613798	70694585	ENSG00000157368	IL34	artery_aorta	protein_coding	59	0.0536905	0.00759931	-1.18	0.0123
16	79745736	79745736	ENSG00000261390.1	RP11-345M22.2	esophagus_muscularis	lincRNA	19	0.126081	1.05346e-11	-5.39	0.0123
16	79745487	79745487	ENSG00000261390.1	RP11-345M22.2	artery_tibial	lincRNA	19	0.206501	6.34747e-17	-5.53	0.0123
7	124386051	124405681	ENSG00000170775	GPR37	lung	protein_coding	20	0.129475	2.00886e-09	-0.801	0.0122
1	59762310	60233347	ENSG00000172456	FGGY	brain_cortex	protein_coding	15	0.0532404	0.0185758	-1.29	0.0121
12	66582659	66648402	ENSG00000090376	IRAK3	blood	protein_coding	31	0.0749107	2.34289e-23	-1.96	0.0121
8	133133108	133493200	ENSG00000184156	KCNQ3	pancreas	protein_coding	19	0.043127	0.139875	0.222	0.0121
1	62146718	62191095	ENSG00000162604	TM2D1	esophagus_mucosa	protein_coding	15	0.0294953	0.0310212	-1.14	0.012
1	232940643	232946092	ENSG00000212916	MAP10	liver	protein_coding	15	0.0718621	0.152371	1.47	0.012
10	77360998	78319925	ENSG00000148655	C10orf11	artery_coronary	protein_coding	32	0.137137	2.10826e-05	1.47	0.012
19	22235254	22274282	ENSG00000197134	ZNF257	brain_cerebellar_hemisphere	protein_coding	77	0.385459	2.3817e-14	5.6	0.012
5	850406	892939	ENSG00000028310	BRD9	nerve_tibial	protein_coding	36	0.0433887	0.00079752	-2.42	0.012
1	233463474	233521070	KIAA1804	KIAA1804	blood	NA	15	0.0401053	6.09532e-13	-1.56	0.0119
10	79793518	79816570	ENSG00000138326	RPS24	colon_transverse	protein_coding	32	0.0528652	0.147885	1.47	0.0119
12	66517697	66563765	ENSG00000155957	TMBIM4	spleen	protein_coding	31	0.213383	8.24418e-08	-1.93	0.0119
15	41136216	41150405	ENSG00000166145	SPINT1	nerve_tibial	protein_coding	47	0.0584789	0.00117673	1.55	0.0119
16	80574631	80584657	ENSG00000168589	DYNLRB2	testis	protein_coding	19	0.222375	3.48249e-12	1.17	0.0119
5	1005154	1006738	ENSG00000272347	RP11-43F13.4	brain_frontal_cortex_ba9	lincRNA	36	0.0763443	0.000506343	2.94	0.0119
8	133787618	133861052	ENSG00000129292	PHF20L1	nerve_tibial	protein_coding	19	0.072528	0.000721065	-0.0789	0.0119
8	133572745	133573726	ENSG00000253521	HPYR1	pituitary	lincRNA	19	-0.0171808	0.0423474	-0.27	0.0119
10	77360998	78319925	ENSG00000148655	C10orf11	esophagus_muscularis	protein_coding	32	0.371286	1.28931e-32	-1.4	0.0118
12	66517697	66563765	ENSG00000155957	TMBIM4	prostate	protein_coding	31	0.0848199	0.000625353	-0.978	0.0118
16	79742441	79742441	ENSG00000261390.1	RP11-345M22.2	skin_not_sun_exposed_suprapubic	lincRNA	19	0.40389	5.05899e-35	-5.59	0.0118
19	21820776	21839102	ENSG00000268278	RP11-420K14.1	testis	pseudogene	77	0.0744524	0.117102	-3.38	0.0118
5	710471	851101	ENSG00000188818	ZDHHC11	skin_not_sun_exposed_suprapubic	protein_coding	36	0.181956	3.55813e-14	2.5	0.0118
8	134338240	134338647	ENSG00000243537	CTC-458A3.1	esophagus_mucosa	pseudogene	19	0.0560078	4.91777e-05	0.255	0.0118
8	133697253	133772958	ENSG00000165071	TMEM71	heart_left_ventricle	protein_coding	19	0.129321	1.54807e-09	-0.0407	0.0118
1	59762310	60233347	ENSG00000172456	FGGY	skin_sun_exposed_lower_leg	protein_coding	15	0.139633	3.48295e-08	-1.01	0.0117
1	219347186	219386207	ENSG00000143353	LYPLAL1	brain_caudate_basal_ganglia	protein_coding	19	0.0930115	0.000666387	-0.659	0.0117
1	231472850	231490769	ENSG00000010072	SPRTN	cells_transformed_fibroblasts	protein_coding	15	0.0738504	3.26909e-05	1.41	0.0117
1	243419320	243663394	ENSG00000054282	SDCCAG8	colon_sigmoid	protein_coding	36	0.145005	1.00214e-06	5.89	0.0117
19	22573898	22605148	ENSG00000197360	ZNF98	brain_dorsolateral_prefrontal_cortex	protein_coding	77	0.329618	3.30241e-41	1.63	0.0117
8	33228342	33330940	ENSG00000172728	FUT10	brain_spinal_cord_cervical_c-1	protein_coding	10	0.317942	6.04452e-05	1.22	0.0117
8	134249414	134314265	ENSG00000104419	NDRG1	breast_mammary_tissue	protein_coding	19	-0.00139948	0.00572716	0.0126	0.0117
1	58881056	59012474	ENSG00000162600	OMA1	cells_ebv-transformed_lymphocytes	protein_coding	15	0.0799826	0.0255437	-0.957	0.0116
15	40820882	40857256	ENSG00000128891	C15orf57	brain_amygdala	protein_coding	47	0.490905	1.74034e-13	4.61	0.0116
15	40820882	40857256	ENSG00000128891	C15orf57	skin_not_sun_exposed_suprapubic	protein_coding	47	0.406276	1.19201e-31	3.45	0.0116
8	133584320	133687838	ENSG00000129295	LRRC6	small_intestine_terminal_ileum	protein_coding	19	0.0115805	0.191694	0.199	0.0116
8	134048973	134115298	ENSG00000155926	SLA	lung	protein_coding	19	0.0189424	0.0455909	-0.0248	0.0116
8	134014850	134015320	ENSG00000240237	CTD-2182N23.1	esophagus_gastroesophageal_junction	pseudogene	19	0.0441037	0.0900203	0.0386	0.0116
9	19053141	19103117	ENSG00000147874	HAUS6	breast_mammary_tissue	protein_coding	30	0.0361425	0.00294276	-5.15	0.0116
1	59120411	59165764	ENSG00000162601	MYSM1	muscle_skeletal	protein_coding	15	0.0100987	0.0050159	1.14	0.0115
12	65812511	65813807	ENSG00000215208	KRT18P60	artery_aorta	pseudogene	31	-0.00331856	0.00278596	-1.8	0.0115
15	40820882	40857256	ENSG00000128891	C15orf57	adipose_subcutaneous	protein_coding	47	0.496951	1.05843e-49	3.12	0.0115
8	134048973	134115298	ENSG00000155926	SLA	blood	protein_coding	19	0.0372524	2.75893e-12	0.0726	0.0115
1	231154704	231175992	ENSG00000182118	FAM89A	brain_cerebellar_hemisphere	protein_coding	15	0.092024	0.0273018	-1.4	0.0114
1	241587592	241596792	ENSG00000225554	RP11-527D7.1	spleen	lincRNA	36	0.0511583	0.00322128	1.39	0.0114
10	103541082	103543170	ENSG00000107833	NPM3	brain_caudate_basal_ganglia	protein_coding	63	0.0544442	0.0394002	0.901	0.0114
10	104221149	104236802	ENSG00000138111	TMEM180	prostate	protein_coding	63	0.182526	9.54129e-07	-0.901	0.0114
16	7.97066e+07	7.97066e+07	ENSG00000261390.1	RP11-345M22.2	muscle_skeletal	lincRNA	19	0.076613	2.20882e-06	-5.71	0.0114
1	59762310	60233347	ENSG00000172456	FGGY	thyroid	protein_coding	15	0.12431	1.10914e-07	-1.28	0.0113
1	217804666	218045038	ENSG00000162814	SPATA17	cells_transformed_fibroblasts	protein_coding	19	0.00341039	0.037647	-0.566	0.0113
7	124462440	124570037	ENSG00000128513	POT1	spleen	protein_coding	20	0.0701652	0.00936338	1.59	0.0113
1	60223332	60223332	ENSG00000231816.1	RP4-782L23.1	artery_tibial	lincRNA	15	0.01886	0.196079	1.16	0.0112
1	232533711	232697304	ENSG00000116991	SIPA1L2	nerve_tibial	protein_coding	15	0.0330379	0.0774739	-1.44	0.0112
15	68594050	68724501	ENSG00000137809	ITGA11	colon_sigmoid	protein_coding	30	0.00711969	0.0337991	-1.95	0.0112
5	413954	413954	ENSG00000221990.2	C5orf55	esophagus_gastroesophageal_junction	protein_coding	36	0.170545	6.59126e-09	5.83	0.0112
5	111478138	111755013	ENSG00000129595	EPB41L4A	breast_mammary_tissue	protein_coding	20	0.169701	3.4823e-09	-3.87	0.0112
6	45868045	46048132	ENSG00000112782	CLIC5	adipose_subcutaneous	protein_coding	32	0.0413194	0.0109278	-2.15	0.0112
7	124791380	124793665	ENSG00000224899	RP11-3B12.5	artery_coronary	lincRNA	20	0.138695	0.0063149	-1.84	0.0112
9	19375713	19380252	ENSG00000137154	RPS6	muscle_skeletal	protein_coding	30	0.0487423	5.77011e-07	1.88	0.0112
10	79550549	79686378	ENSG00000151208	DLG5	heart_atrial_appendage	protein_coding	32	0.381503	4.95522e-23	-1.4	0.0111
9	18473892	18910948	ENSG00000178031	ADAMTSL1	nerve_tibial	protein_coding	30	0.071297	0.001542	1.72	0.0111
1	59485277	59485277	ENSG00000230812.1	RP4-794H19.4	ovary	lincRNA	15	0.071986	0.340244	1	0.011
10	104845940	104953056	ENSG00000076685	NT5C2	nerve_tibial	protein_coding	63	0.0576473	0.363002	1.88	0.011
15	68560130	68570332	ENSG00000260657	RP11-315D16.4	brain_amygdala	lincRNA	30	0.258538	4.60929e-05	1.24	0.011
16	79741273	79741273	ENSG00000261390.1	RP11-345M22.2	brain_cortex	lincRNA	19	0.10564	1.02306e-05	-5.3	0.011
7	126986844	127071978	ENSG00000048405	ZNF800	muscle_skeletal	protein_coding	20	0.0469173	0.0098762	-0.879	0.011
1	59762310	60233347	ENSG00000172456	FGGY	colon_sigmoid	protein_coding	15	0.00843804	0.0382745	-1.08	0.0109
16	71671738	71758604	ENSG00000040199	PHLPP2	spleen	protein_coding	59	0.172812	0.000172109	-2.31	0.0109
6	43021767	43027544	ENSG00000112651	MRPL2	artery_tibial	protein_coding	32	0.0238109	0.0205869	0.00535	0.0109
7	127010353	127032767	ENSG00000048405	ZNF800	brain_dorsolateral_prefrontal_cortex	protein_coding	20	0.633149	2.93024e-100	-0.202	0.0109
1	61091994	61091994	ENSG00000226476.2	RP11-776H12.1	esophagus_mucosa	lincRNA	15	0.0109656	0.0172211	1.01	0.0108
1	218023745	218023975	ENSG00000228247	UBBP2	testis	pseudogene	19	0.0171257	0.198918	0.529	0.0108
19	21902603	21902837	ENSG00000268117	VN1R84P	colon_transverse	pseudogene	77	0.358227	1.3138e-23	-2.89	0.0108
5	110559351	110830584	ENSG00000152495	CAMK4	cells_ebv-transformed_lymphocytes	protein_coding	20	0.108052	0.0567225	-1.66	0.0108
1	60563087	60563648	ENSG00000229332	PGBD4P8	testis	pseudogene	15	0.0102969	0.00229325	1.04	0.0107
16	81069452	81080963	ENSG00000166454	ATMIN	muscle_skeletal	protein_coding	19	0.428806	2.40772e-53	0.53	0.0107
1	219347186	219386207	ENSG00000143353	LYPLAL1	esophagus_mucosa	protein_coding	19	0.073639	2.43838e-05	0.555	0.0106
19	22235254	22274282	ENSG00000197134	ZNF257	adipose_subcutaneous	protein_coding	77	0.262033	9.92963e-20	5.68	0.0106
7	126078652	126893348	ENSG00000179603	GRM8	stomach	protein_coding	20	0.0600856	0.00258059	0.479	0.0106
7	127292234	127732661	ENSG00000197157	SND1	esophagus_muscularis	protein_coding	20	0.144764	8.84767e-11	0.668	0.0106
1	60557077	60557077	ENSG00000231816.1	RP4-782L23.1	adipose_visceral_omentum	lincRNA	15	0.0357071	0.0191966	1.1	0.0105
1	215179118	215410436	ENSG00000082482	KCNK2	heart_left_ventricle	protein_coding	19	0.101505	0.261655	-0.399	0.0105
1	233463514	233520894	ENSG00000143674	MLK4	brain_amygdala	protein_coding	15	0.057207	0.0371926	1.47	0.0105
16	79360103	79360103	ENSG00000261390.1	RP11-345M22.2	adipose_visceral_omentum	lincRNA	19	0.221765	1.45835e-15	-5.22	0.0105
3	170063466	170071749	ENSG00000239628	RP11-543D10.2	testis	lincRNA	50	0.179175	2.32663e-08	1.49	0.0105
3	169511216	169530774	ENSG00000171757	LRRC34	nerve_tibial	protein_coding	50	0.130998	1.37439e-09	5.53	0.0105
3	170128300	170136403	ENSG00000242578	RP11-469J4.3	artery_coronary	lincRNA	50	0.0922422	0.0887651	1.54	0.0105
7	126986844	127071978	ENSG00000048405	ZNF800	brain_substantia_nigra	protein_coding	20	0.06385	6.00552e-05	-0.648	0.0105
9	19375713	19380252	ENSG00000137154	RPS6	lung	protein_coding	30	0.0337739	0.00296929	1.45	0.0105
1	60280458	60342050	ENSG00000134709	HOOK1	heart_left_ventricle	protein_coding	15	0.0510208	0.000212328	0.901	0.0104
1	232940643	232946092	ENSG00000212916	MAP10	artery_tibial	protein_coding	15	0.0693241	0.000240953	-1.46	0.0104
12	66517697	66563765	ENSG00000155957	TMBIM4	colon_sigmoid	protein_coding	31	0.112484	0.000463498	-1.84	0.0104
16	80574631	80584657	ENSG00000168589	DYNLRB2	pituitary	protein_coding	19	0.0525797	0.0343495	-0.968	0.0104
1	218519577	218617961	ENSG00000092969	TGFB2	brain_frontal_cortex_ba9	protein_coding	19	0.0693234	0.00681341	-0.335	0.0103
10	79550549	79686378	ENSG00000151208	DLG5	skin_not_sun_exposed_suprapubic	protein_coding	32	0.265394	3.11254e-17	-1.27	0.0103
10	79490524	79494527	ENSG00000213514	RP11-428P16.2	cells_transformed_fibroblasts	pseudogene	32	0.0675038	0.00126197	-1.27	0.0103
3	170075472	170114637	ENSG00000136603	SKIL	brain_dorsolateral_prefrontal_cortex	protein_coding	50	0.00389817	0.0970457	-1.53	0.0103
1	216676588	217311097	ENSG00000196482	ESRRG	skin_not_sun_exposed_suprapubic	protein_coding	19	-0.00944483	0.27059	0.221	0.0102
1	218519577	218617961	ENSG00000092969	TGFB2	adrenal_gland	protein_coding	19	0.0642386	0.027045	-0.391	0.0102
1	216676588	217311097	ENSG00000196482	ESRRG	testis	protein_coding	19	0.0268051	0.0068566	0.301	0.0102
12	66582659	66648402	ENSG00000090376	IRAK3	cells_transformed_fibroblasts	protein_coding	31	0.0533502	0.260178	-2.22	0.0102
12	65174589	65274812	ENSG00000111490	TBC1D30	colon_sigmoid	protein_coding	31	0.0518288	0.164669	1	0.0102
16	71671738	71758604	ENSG00000040199	PHLPP2	adipose_visceral_omentum	protein_coding	59	0.0432732	0.00978727	-1.63	0.0102
16	80722386	80722386	ENSG00000260896.1	RP11-314O13.1	nerve_tibial	lincRNA	19	0.02807	0.242784	-1.15	0.0102
19	22235254	22274282	ENSG00000197134	ZNF257	brain_cerebellum	protein_coding	77	0.373049	3.5527e-12	5.85	0.0102
19	22939007	22966909	ENSG00000213973	ZNF99	testis	protein_coding	77	0.0620887	0.000613046	-4.15	0.0102
19	2.10431e+07	2.10431e+07	ENSG00000160229.7	ZNF66	thyroid	protein_coding	77	0.0601021	0.000843609	2.25	0.0102
5	112220791	112221442	ENSG00000249947	XBP1P1	whole_blood	pseudogene	20	0.00764279	0.302178	1.52	0.0102
5	112357796	112824527	ENSG00000171444	MCC	pituitary	protein_coding	20	0.108283	0.00281486	-2.55	0.0102
1	62208149	62629592	ENSG00000132849	INADL	muscle_skeletal	protein_coding	15	0.111205	1.50617e-11	0.959	0.0101
1	59762310	60233347	ENSG00000172456	FGGY	brain_caudate_basal_ganglia	protein_coding	15	0.0233639	0.00463666	-0.656	0.0101
1	232533711	232697304	ENSG00000116991	SIPA1L2	esophagus_mucosa	protein_coding	15	0.0573514	0.000218254	-0.942	0.0101
1	243419320	243663394	ENSG00000054282	SDCCAG8	artery_aorta	protein_coding	36	0.093973	1.69438e-05	6.39	0.0101
10	80765048	80765048	ENSG00000227136.2	LINC00595	esophagus_gastroesophageal_junction	lincRNA	32	0.0593312	0.00092047	-1.2	0.0101
16	81040103	81066719	ENSG00000166451	CENPN	artery_aorta	protein_coding	19	0.116819	1.37329e-06	-1.24	0.0101
16	79432025	79432025	ENSG00000261390.1	RP11-345M22.2	adipose_subcutaneous	lincRNA	19	0.243348	2.58907e-21	-4.97	0.0101
3	170606204	170626482	ENSG00000163577	EIF5A2	stomach	protein_coding	50	0.00167409	0.127014	-1.06	0.0101
7	127228399	127231759	ENSG00000004059	ARF5	artery_tibial	protein_coding	20	0.0325327	0.0935674	0.638	0.0101
10	79793518	79816570	ENSG00000138326	RPS24	muscle_skeletal	protein_coding	32	0.0759147	9.32189e-13	-0.223	0.01
16	71481500	71496998	ENSG00000167377	ZNF23	brain_amygdala	protein_coding	59	0.133165	0.0562039	-1.91	0.01
1	218216847	218232482	ENSG00000232100	RP11-152L7.2	testis	lincRNA	19	0.0390053	0.0470766	-0.146	0.00998
7	126078652	126893348	ENSG00000179603	GRM8	thyroid	protein_coding	20	0.0170487	0.0461961	-0.508	0.00998
16	7.97257e+07	7.97257e+07	ENSG00000261390.1	RP11-345M22.2	artery_aorta	lincRNA	19	0.225891	8.95625e-14	-5.08	0.00997
16	78133310	79246564	ENSG00000186153	WWOX	thyroid	protein_coding	19	0.242	9.17067e-26	0.995	0.00996
7	124386051	124405681	ENSG00000170775	GPR37	artery_tibial	protein_coding	20	0.0238478	0.0410359	-1.54	0.00995
1	61330931	61928465	ENSG00000162599	NFIA	esophagus_muscularis	protein_coding	15	0.0225682	0.00545467	-0.865	0.00994
16	81040103	81066719	ENSG00000166451	CENPN	nerve_tibial	protein_coding	19	0.0363296	0.0460349	0.746	0.00994
1	217804666	218045038	ENSG00000162814	SPATA17	brain_caudate_basal_ganglia	protein_coding	19	0.0235056	0.00810351	-0.0841	0.00993
1	241792155	241799232	ENSG00000203668	CHML	artery_tibial	protein_coding	36	0.110266	8.51808e-08	1.03	0.00993
1	218519577	218617961	ENSG00000092969	TGFB2	testis	protein_coding	19	0.0276302	0.00698929	0.0401	0.00992
16	70613798	70694585	ENSG00000157368	IL34	nerve_tibial	protein_coding	59	0.173051	2.60428e-12	-2.15	0.0099
16	78133310	79246564	ENSG00000186153	WWOX	pituitary	protein_coding	19	0.12781	0.000459896	-0.61	0.00988
15	40820882	40857256	ENSG00000128891	C15orf57	artery_aorta	protein_coding	47	0.555445	1.4027e-36	2.77	0.00987
16	71481512	71496126	ENSG00000167377	ZNF23	blood	protein_coding	59	0.0128933	3.52702e-05	-2.03	0.00987
5	112043195	112181936	ENSG00000134982	APC	cells_transformed_fibroblasts	protein_coding	20	0.0293757	0.187849	-2.18	0.00985
5	110831731	110848288	ENSG00000164211	STARD4	esophagus_muscularis	protein_coding	20	0.0374561	0.38221	-1.37	0.00983
16	79619740	79634611	ENSG00000178573	MAF	blood	protein_coding	19	0.0441391	2.75513e-14	1.22	0.00982
15	40820882	40857256	ENSG00000128891	C15orf57	brain_cerebellum	protein_coding	47	0.265104	1.44722e-11	1.73	0.0098
10	79550549	79686378	ENSG00000151208	DLG5	blood	protein_coding	32	0.0303396	2.7642e-10	-1.15	0.00979
7	124386051	124405681	ENSG00000170775	GPR37	uterus	protein_coding	20	0.245615	0.000579837	0.439	0.00978
7	126151189	126152933	ENSG00000227249	AC000374.1	thyroid	pseudogene	20	0.100955	1.16913e-07	-0.675	0.00976
1	62124388	62124388	ENSG00000223920.2	RP11-430G17.1	skin_sun_exposed_lower_leg	pseudogene	15	0.0449169	0.00242921	0.955	0.00975
1	231762561	232177018	ENSG00000162946	DISC1	muscle_skeletal	protein_coding	15	0.137969	7.79739e-13	1.27	0.00974
5	112357796	112824527	ENSG00000171444	MCC	minor_salivary_gland	protein_coding	20	-0.0180293	0.0422246	-1.07	0.00974
10	104221149	104236802	ENSG00000138111	TMEM180	brain_frontal_cortex_ba9	protein_coding	63	0.0612266	0.160111	1.58	0.00969
18	904944	912173	ENSG00000141433	ADCYAP1	lung	protein_coding	35	0.23785	1.31614e-21	-1.79	0.00969
1	233086351	233119628	ENSG00000135778	NTPCR	brain_hypothalamus	protein_coding	15	0.261374	5.94025e-08	0.0843	0.00968
1	234040679	234460262	ENSG00000183780	SLC35F3	esophagus_gastroesophageal_junction	protein_coding	15	0.0529431	0.00278178	1.41	0.00967
15	40820882	40857256	ENSG00000128891	C15orf57	brain_substantia_nigra	protein_coding	47	0.338543	2.8073e-06	3.13	0.00967
3	170714137	170744539	ENSG00000163581	SLC2A2	testis	protein_coding	50	0.0299627	0.0710685	-1.82	0.00967
7	126078651	126893147	ENSG00000179603	GRM8	brain_dorsolateral_prefrontal_cortex	protein_coding	20	0.156975	1.16636e-18	0.454	0.00964
12	66517697	66563765	ENSG00000155957	TMBIM4	breast_mammary_tissue	protein_coding	31	0.218958	1.47858e-11	-1.81	0.00963
16	71867690	71869835	ENSG00000262140	RP11-417N10.3	adipose_visceral_omentum	pseudogene	59	0.0214428	0.1341	1.77	0.0096
16	79710005	79841819	ENSG00000260876	RP11-345M22.1	skin_sun_exposed_lower_leg	lincRNA	19	0.570676	4.14293e-62	-0.992	0.0096
1	233749750	233808258	ENSG00000135750	KCNK1	esophagus_gastroesophageal_junction	protein_coding	15	0.0056444	0.0954656	-1.29	0.00957
12	65004293	65091347	ENSG00000153179	RASSF3	ovary	protein_coding	31	-0.027681	0.000400865	-1.64	0.00956
1	59754975	59755312	ENSG00000270457	RP11-467C18.1	small_intestine_terminal_ileum	lincRNA	15	0.0749991	0.000748843	0.743	0.00955
1	60280458	60342050	ENSG00000134709	HOOK1	adipose_subcutaneous	protein_coding	15	0.0679778	2.9695e-06	0.83	0.00953
18	670324	712676	ENSG00000132199	ENOSF1	colon_transverse	protein_coding	35	0.291637	4.0098e-10	4.14	0.00953
19	22235254	22274282	ENSG00000197134	ZNF257	small_intestine_terminal_ileum	protein_coding	77	0.153727	1.73015e-06	5.97	0.00953
16	71671738	71758604	ENSG00000040199	PHLPP2	skin_not_sun_exposed_suprapubic	protein_coding	59	0.144141	1.68351e-09	-1.38	0.00952
7	126986844	127071978	ENSG00000048405	ZNF800	skin_sun_exposed_lower_leg	protein_coding	20	0.0143788	0.181417	-0.263	0.00951
16	79701074	79701074	ENSG00000261390.1	RP11-345M22.2	skin_sun_exposed_lower_leg	lincRNA	19	0.403104	4.93019e-40	-4.91	0.0095
6	46126924	46138708	ENSG00000112796	ENPP5	brain_hypothalamus	protein_coding	32	0.144696	0.00880133	-2.11	0.00947
12	66517697	66563765	ENSG00000155957	TMBIM4	adrenal_gland	protein_coding	31	0.163978	9.86899e-06	-1.77	0.00946
16	79714416	79714416	ENSG00000261390.1	RP11-345M22.2	small_intestine_terminal_ileum	lincRNA	19	0.148656	0.000446301	-4.91	0.00945
5	850406	892939	ENSG00000028310	BRD9	thyroid	protein_coding	36	0.0476117	1.45268e-07	-2.21	0.00945
12	66516842	66524548	ENSG00000139233	LLPH	pituitary	protein_coding	31	0.0557976	0.00420841	1.78	0.00937
14	35591052	35743271	ENSG00000100890	KIAA0391	adrenal_gland	protein_coding	54	0.0314944	0.0285024	-6.27	0.00937
19	5784843	5791249	ENSG00000141994	DUS3L	breast_mammary_tissue	protein_coding	69	0.201114	1.40194e-12	-1.87	0.00937
1	231762561	232177018	ENSG00000162946	DISC1	whole_blood	protein_coding	15	0.170617	1.25479e-11	-1.3	0.00935
1	233086351	233119628	ENSG00000135778	NTPCR	esophagus_gastroesophageal_junction	protein_coding	15	0.191833	2.49425e-12	1.22	0.00935
1	233086351	233119628	ENSG00000135778	NTPCR	heart_left_ventricle	protein_coding	15	0.388168	5.77616e-25	0.637	0.0093
7	125071401	125106455	ENSG00000227869	RP11-807H17.1	brain_putamen_basal_ganglia	lincRNA	20	0.0613995	0.0564314	0.997	0.00928
15	40845008	40857252	C15orf57	C15orf57	blood	NA	47	0.143829	4.73941e-44	1.99	0.00926
16	81115566	81130008	ENSG00000140905	GCSH	heart_left_ventricle	protein_coding	19	0.0951525	1.76891e-06	1.15	0.00926
1	243419320	243663394	ENSG00000054282	SDCCAG8	brain_cortex	protein_coding	36	0.0493744	0.0209532	6.4	0.00925
16	79731138	79731138	ENSG00000261390.1	RP11-345M22.2	vagina	lincRNA	19	0.141161	3.13087e-05	-5.65	0.00925
1	60280462	60342050	ENSG00000134709	HOOK1	brain_dorsolateral_prefrontal_cortex	protein_coding	15	0.0348928	3.81285e-05	-0.793	0.00924
8	33342268	33358778	ENSG00000198042	MAK16	muscle_skeletal	protein_coding	10	0.0141834	0.151697	6.82	0.00924
16	79677381	79677381	ENSG00000261390.1	RP11-345M22.2	esophagus_gastroesophageal_junction	lincRNA	19	0.230691	3.2716e-11	-5.04	0.00922
1	233119181	233431459	PCNXL2	PCNXL2	adipose	NA	15	0.0324753	1.02203e-05	0.7	0.00921
7	126078652	126893348	ENSG00000179603	GRM8	brain_amygdala	protein_coding	20	0.0881006	0.208308	0.436	0.0092
19	7587512	7598895	ENSG00000090674	MCOLN1	blood	protein_coding	69	0.0295997	4.5228e-10	-1.83	0.00917
1	60452941	60539442	ENSG00000162598	C1orf87	pituitary	protein_coding	15	0.0522284	0.105586	0.617	0.00916
9	19460924	19464522	ENSG00000231909	RP11-363E7.3	testis	pseudogene	30	0.0404269	0.00729533	1.45	0.00916
1	231762561	232177018	ENSG00000162946	DISC1	adipose_subcutaneous	protein_coding	15	0.0581472	0.00134816	-1.21	0.00915
16	71498453	71598992	ENSG00000157429	ZNF19	thyroid	protein_coding	59	0.012925	0.00469444	-2.39	0.00915
3	169490619	169507504	ENSG00000085274	MYNN	artery_aorta	protein_coding	50	0.0515786	0.0721298	-3.09	0.00915
1	62208149	62629592	ENSG00000132849	INADL	artery_tibial	protein_coding	15	0.122652	1.07905e-12	-0.735	0.00913
16	79710005	79841819	ENSG00000260876	RP11-345M22.1	adipose_visceral_omentum	lincRNA	19	0.0890594	0.100336	0.704	0.00912
1	233086351	233119628	ENSG00000135778	NTPCR	minor_salivary_gland	protein_coding	15	0.121877	5.6909e-05	0.357	0.00911
12	66517697	66563765	ENSG00000155957	TMBIM4	pancreas	protein_coding	31	0.121683	9.72115e-05	-1.92	0.00911
1	59762310	60233347	ENSG00000172456	FGGY	brain_frontal_cortex_ba9	protein_coding	15	0.224753	0.00482669	-1	0.00907
10	79550549	79686378	ENSG00000151208	DLG5	nerve_tibial	protein_coding	32	0.473449	8.20612e-43	1.13	0.00907
1	232533711	232697304	ENSG00000116991	SIPA1L2	blood	protein_coding	15	0.195115	1.12834e-61	-1.22	0.00906
12	65107225	65153227	ENSG00000135677	GNS	esophagus_muscularis	protein_coding	31	0.190143	3.08365e-14	-1.72	0.00904
12	65107225	65153227	ENSG00000135677	GNS	muscle_skeletal	protein_coding	31	0.00890514	0.0162722	1.72	0.00904
1	5.94663e+07	5.94663e+07	ENSG00000230812.1	RP4-794H19.4	lung	lincRNA	15	0.0381931	0.0278758	0.924	0.009
1	233749750	233808258	ENSG00000135750	KCNK1	liver	protein_coding	15	0.0439704	0.0122386	1.11	0.009
16	71762913	71843104	ENSG00000166747	AP1G1	pancreas	protein_coding	59	-0.00727546	0.271463	-1.64	0.00899
1	233749750	233808258	ENSG00000135750	KCNK1	breast_mammary_tissue	protein_coding	15	0.0171198	0.00180053	-1.26	0.00897
1	233086351	233119628	ENSG00000135778	NTPCR	muscle_skeletal	protein_coding	15	0.405669	1.25572e-49	0.346	0.00896
16	71671738	71758604	ENSG00000040199	PHLPP2	thyroid	protein_coding	59	0.0954695	5.10745e-09	-2.09	0.00895
6	45295894	45632086	ENSG00000124813	RUNX2	artery_aorta	protein_coding	32	0.0269084	0.193098	-2.5	0.00894
1	233086351	233119628	ENSG00000135778	NTPCR	lung	protein_coding	15	0.279557	8.00012e-21	1.01	0.00893
1	59328135	59328135	ENSG00000230812.1	RP4-794H19.4	adipose_subcutaneous	lincRNA	15	0.0263183	0.0496583	0.75	0.00892
1	233086351	233119628	ENSG00000135778	NTPCR	brain_cortex	protein_coding	15	0.368021	5.69382e-13	-0.0526	0.00892
1	243419320	243663394	ENSG00000054282	SDCCAG8	heart_atrial_appendage	protein_coding	36	0.0647618	0.000101498	6.28	0.0089
1	233119181	233431459	ENSG00000135749	PCNXL2	thyroid	protein_coding	15	0.067018	0.0246818	1.1	0.00888
12	66530716	66563807	ENSG00000155957	TMBIM4	blood	protein_coding	31	0.133055	1.16166e-40	-1.78	0.00887
16	70514471	70557468	ENSG00000103051	COG4	heart_atrial_appendage	protein_coding	59	0.0799545	1.181e-05	2	0.00886
1	59522315	59553867	ENSG00000237352	RP11-145M4.3	lung	lincRNA	15	0.0433836	0.00398576	-0.776	0.00884
5	710471	851101	ENSG00000188818	ZDHHC11	liver	protein_coding	36	0.0245387	0.000494966	3.18	0.00883
7	127292234	127732661	ENSG00000197157	SND1	nerve_tibial	protein_coding	20	0.303658	7.70016e-23	-0.272	0.00883
15	66628544	66679084	ENSG00000075131	TIPIN	adipose_subcutaneous	protein_coding	30	0.309042	1.17416e-26	-3.62	0.00882
1	59056605	59056605	ENSG00000234807.4	RP4-794H19.2	spleen	lincRNA	15	0.0372345	0.210108	-0.674	0.00881
15	66585644	66626236	ENSG00000166938	DIS3L	blood	protein_coding	30	0.0338942	3.62116e-11	1.97	0.00881
19	22235254	22274282	ENSG00000197134	ZNF257	stomach	protein_coding	77	0.134708	7.66135e-06	5.75	0.00881
16	79540713	79540713	ENSG00000261390.1	RP11-345M22.2	thyroid	lincRNA	19	0.171506	8.50424e-13	-4.99	0.0088
1	60280458	60342050	ENSG00000134709	HOOK1	adipose	protein_coding	15	0.0581497	4.22445e-09	0.0232	0.00879
1	231376953	231413719	ENSG00000116906	GNPAT	stomach	protein_coding	15	0.0181229	0.0223783	-0.905	0.00878
15	66585555	66626236	ENSG00000166938	DIS3L	brain_putamen_basal_ganglia	protein_coding	30	0.0167779	0.00172113	-1.93	0.00877
5	710471	851101	ENSG00000188818	ZDHHC11	spleen	protein_coding	36	0.0666221	2.25088e-05	-3.12	0.00877
9	19230433	19374139	ENSG00000137145	DENND4C	blood	protein_coding	30	0.0412327	1.92974e-13	1.35	0.00877
1	62208149	62629592	ENSG00000132849	INADL	thyroid	protein_coding	15	0.0569152	0.00227064	-0.755	0.00876
12	66517697	66563765	ENSG00000155957	TMBIM4	artery_tibial	protein_coding	31	0.16965	2.3563e-14	-1.73	0.0087
16	72816784	73093597	ENSG00000140836	ZFHX3	skin_not_sun_exposed_suprapubic	protein_coding	59	0.0337727	0.00320875	-0.599	0.0087
9	20995306	21031635	ENSG00000188921	PTPLAD2	brain_amygdala	protein_coding	30	-0.00420195	0.186851	1.15	0.00868
1	233086351	233119628	ENSG00000135778	NTPCR	heart_atrial_appendage	protein_coding	15	0.336045	8.67181e-24	0.175	0.00865
15	40820882	40857256	ENSG00000128891	C15orf57	brain_caudate_basal_ganglia	protein_coding	47	0.267532	1.752e-06	2	0.00863
1	233086351	233119628	ENSG00000135778	NTPCR	skin_sun_exposed_lower_leg	protein_coding	15	0.429995	5.62732e-43	0.907	0.00861
9	19375713	19380252	ENSG00000137154	RPS6	brain_cerebellum	protein_coding	30	0.0705839	0.00300286	1.64	0.00859
15	41060067	41099675	ENSG00000104129	DNAJC17	cells_transformed_fibroblasts	protein_coding	47	0.0367145	0.00129754	5.2	0.00856
15	40820882	40857256	ENSG00000128891	C15orf57	liver	protein_coding	47	0.363397	6.76954e-14	2.46	0.00856
5	112357796	112824527	ENSG00000171444	MCC	muscle_skeletal	protein_coding	20	0.0944963	4.51294e-10	-1.39	0.00855
1	62146718	62191095	ENSG00000162604	TM2D1	pancreas	protein_coding	15	0.0261161	0.0011639	-0.686	0.00854
16	80631803	80838226	ENSG00000166446	CDYL2	adipose_visceral_omentum	protein_coding	19	0.0769976	1.01282e-05	1.25	0.00854
16	71498453	71598992	ENSG00000157429	ZNF19	minor_salivary_gland	protein_coding	59	0.0416785	0.0164241	2.21	0.00853
7	127292234	127732661	ENSG00000197157	SND1	adipose_visceral_omentum	protein_coding	20	0.0853687	4.82272e-07	0.396	0.00849
1	233086351	233119628	ENSG00000135778	NTPCR	brain_nucleus_accumbens_basal_ganglia	protein_coding	15	0.315121	4.75101e-10	0.126	0.00848
5	112220791	112221442	ENSG00000249947	XBP1P1	nerve_tibial	pseudogene	20	0.0598484	0.0125445	1.74	0.00848
7	127220672	127233665	ENSG00000179562	GCC1	liver	protein_coding	20	-0.00581993	0.000519027	0.0709	0.00848
9	19375713	19380252	ENSG00000137154	RPS6	skin_not_sun_exposed_suprapubic	protein_coding	30	0.00281014	0.285807	2.52	0.00848
1	59762310	60233347	ENSG00000172456	FGGY	brain_hypothalamus	protein_coding	15	0.177589	9.35319e-06	-0.719	0.00847
1	233463514	233520894	ENSG00000143674	MLK4	skin_sun_exposed_lower_leg	protein_coding	15	0.424184	8.43057e-45	-1.12	0.00847
7	127292234	127732661	ENSG00000197157	SND1	pancreas	protein_coding	20	0.0983887	0.00717906	0.545	0.00847
1	59762310	60233347	ENSG00000172456	FGGY	heart_left_ventricle	protein_coding	15	0.118911	0.0695728	-0.764	0.00845
7	124462440	124570037	ENSG00000128513	POT1	brain_frontal_cortex_ba9	protein_coding	20	0.0538992	0.052036	-0.0458	0.00844
9	19108373	19149288	ENSG00000147872	PLIN2	whole_blood	protein_coding	30	0.0078485	0.0549804	-0.906	0.00844
16	80631803	80838226	ENSG00000166446	CDYL2	esophagus_muscularis	protein_coding	19	0.0239684	0.0271378	4.53	0.00843
5	112212084	112258236	ENSG00000129625	REEP5	colon_sigmoid	protein_coding	20	0.109538	3.24898e-05	-2.09	0.00843
1	233749750	233808258	ENSG00000135750	KCNK1	adrenal_gland	protein_coding	15	0.107632	0.0090363	1.2	0.00842
1	58881056	59012474	ENSG00000162600	OMA1	lung	protein_coding	15	0.027967	0.0489583	-0.528	0.00841
1	243419320	243663394	ENSG00000054282	SDCCAG8	brain_hypothalamus	protein_coding	36	0.138535	0.000376654	3.7	0.0084
19	7112266	7294045	ENSG00000171105	INSR	artery_aorta	protein_coding	69	0.141479	1.81414e-05	4.53	0.00839
3	169804520	169899537	ENSG00000173889	PHC3	whole_blood	protein_coding	50	0.0418742	6.60663e-05	1.25	0.00837
3	168621154	168639784	ENSG00000242268	RP11-368I23.2	lung	lincRNA	50	0.0438531	0.000610116	-2.95	0.00837
9	20658308	20995954	ENSG00000188352	FOCAD	muscle_skeletal	protein_coding	30	0.0103171	0.00522698	1.69	0.00836
1	60280458	60342050	ENSG00000134709	HOOK1	heart_atrial_appendage	protein_coding	15	0.0290624	0.00279808	0.566	0.00833
1	233086351	233119628	ENSG00000135778	NTPCR	brain_anterior_cingulate_cortex_ba24	protein_coding	15	0.26692	1.50861e-07	-0.00434	0.00831
6	42931608	42946958	ENSG00000124587	PEX6	stomach	protein_coding	32	0.563305	5.94494e-35	-2.39	0.00831
6	42858005	42858554	ENSG00000221821	C6orf226	muscle_skeletal	protein_coding	32	0.12255	4.34546e-13	2.39	0.00831
1	58881056	59012474	ENSG00000162600	OMA1	artery_tibial	protein_coding	15	0.0787587	2.49782e-07	0.755	0.0083
12	66517697	66563765	ENSG00000155957	TMBIM4	liver	protein_coding	31	0.328582	1.48499e-14	-1.71	0.0083
16	78133310	79246564	ENSG00000186153	WWOX	testis	protein_coding	19	0.206033	1.32388e-08	2.02	0.0083
7	127292234	127732661	ENSG00000197157	SND1	colon_sigmoid	protein_coding	20	0.088569	2.7882e-07	0.315	0.0083
3	169755717	169803191	ENSG00000173890	GPR160	brain_frontal_cortex_ba9	protein_coding	50	0.0654453	0.157709	-2.36	0.00828
9	18473892	18910948	ENSG00000178031	ADAMTSL1	heart_atrial_appendage	protein_coding	30	0.0261421	0.0835033	1.11	0.00826
1	62146718	62191095	ENSG00000162604	TM2D1	pituitary	protein_coding	15	0.0834354	0.0216736	-0.702	0.00825
19	22235254	22274282	ENSG00000197134	ZNF257	brain_spinal_cord_cervical_c-1	protein_coding	77	0.25695	0.00113842	5.77	0.00825
12	66517697	66563765	ENSG00000155957	TMBIM4	colon_transverse	protein_coding	31	0.11473	2.14579e-06	-1.71	0.00824
16	79749975	79749975	ENSG00000261390.1	RP11-345M22.2	colon_transverse	lincRNA	19	0.188436	4.16659e-09	-5.11	0.00822
18	109065	122219	ENSG00000263006	ROCK1P1	brain_hypothalamus	pseudogene	35	0.296176	1.65221e-05	-2.35	0.00821
1	5.91276e+07	5.91276e+07	ENSG00000230812.1	RP4-794H19.4	heart_atrial_appendage	lincRNA	15	0.0341649	0.185214	-0.496	0.00819
1	233086351	233119628	ENSG00000135778	NTPCR	thyroid	protein_coding	15	0.247003	2.80578e-22	0.905	0.00819
19	6426048	6433790	ENSG00000181240	SLC25A41	colon_transverse	protein_coding	69	0.522985	1.9455e-31	3.75	0.00818
10	77360998	78319925	ENSG00000148655	C10orf11	artery_aorta	protein_coding	32	0.0738068	0.000709416	-0.33	0.00817
18	596988	650334	ENSG00000079101	CLUL1	brain_anterior_cingulate_cortex_ba24	protein_coding	35	0.202769	3.8968e-05	-2.64	0.00817
7	124386051	124405681	ENSG00000170775	GPR37	breast_mammary_tissue	protein_coding	20	0.0395949	0.0462752	0.517	0.00817
19	6677715	6730573	ENSG00000125730	C3	cells_ebv-transformed_lymphocytes	protein_coding	69	0.0658887	0.125701	0.888	0.00816
19	21753624	21770124	ENSG00000268555	RP11-678G14.3	brain_cortex	lincRNA	77	0.233841	1.03042e-06	2.87	0.00816
10	104503727	104576021	ENSG00000166272	WBP1L	nerve_tibial	protein_coding	63	0.0201528	0.00689554	-1.46	0.00813
1	5.94437e+07	5.94437e+07	ENSG00000230812.1	RP4-794H19.4	esophagus_muscularis	lincRNA	15	0.126662	0.000101937	0.643	0.00812
1	61330931	61928465	ENSG00000162599	NFIA	brain_cerebellum	protein_coding	15	0.0193384	0.103447	0.657	0.0081
1	233086351	233119628	ENSG00000135778	NTPCR	colon_sigmoid	protein_coding	15	0.216247	1.64096e-09	0.89	0.00808
10	78629359	79398353	ENSG00000156113	KCNMA1	whole_blood	protein_coding	32	0.286024	2.54964e-26	0.998	0.00808
8	33228342	33330940	ENSG00000172728	FUT10	artery_aorta	protein_coding	10	0.26169	2.46025e-15	1.15	0.00807
8	32853696	32902373	ENSG00000247134	RP11-11N9.4	brain_hippocampus	lincRNA	10	0.094753	0.0304575	3.38	0.00805
1	233086351	233119628	ENSG00000135778	NTPCR	whole_blood	protein_coding	15	0.487923	1.93825e-47	0.537	0.00804
1	233086351	233119628	ENSG00000135778	NTPCR	brain_frontal_cortex_ba9	protein_coding	15	0.385744	5.01123e-12	0.0679	0.00803
1	59041099	59043166	ENSG00000184292	TACSTD2	esophagus_mucosa	protein_coding	15	0.0480533	6.10114e-05	-0.494	0.00802
1	233463514	233520894	ENSG00000143674	MLK4	cells_ebv-transformed_lymphocytes	protein_coding	15	0.0570386	0.0487384	1.32	0.00802
10	104613980	104624718	ENSG00000166275	C10orf32	uterus	protein_coding	63	0.0553111	0.0215937	1.52	0.00802
19	5911718	5915888	ENSG00000105519	CAPS	heart_left_ventricle	protein_coding	69	0.0537973	3.90102e-05	-2.23	0.00802
12	66517697	66563765	ENSG00000155957	TMBIM4	skin_not_sun_exposed_suprapubic	protein_coding	31	0.039947	8.31822e-05	-1.58	0.00801
9	19408925	19452018	ENSG00000177076	ACER2	liver	protein_coding	30	0.0334195	0.0497265	0.906	0.00801
19	22235254	22274282	ENSG00000197134	ZNF257	brain_hypothalamus	protein_coding	77	0.271907	6.39927e-07	5.55	0.00799
1	62208149	62629592	ENSG00000132849	INADL	skin_not_sun_exposed_suprapubic	protein_coding	15	0.121016	1.13977e-07	-0.563	0.00798
15	66839517	66858317	ENSG00000188501	LCTL	nerve_tibial	protein_coding	30	-0.00486593	0.129389	-0.762	0.00798
19	22235265	22272721	ENSG00000197134	ZNF257	blood	protein_coding	77	0.0117078	7.74229e-05	5.3	0.00798
10	79793518	79816570	ENSG00000138326	RPS24	brain_frontal_cortex_ba9	protein_coding	32	0.0127206	0.132228	0.909	0.00796
16	7.97664e+07	7.97664e+07	ENSG00000261390.1	RP11-345M22.2	esophagus_mucosa	lincRNA	19	0.153432	1.77877e-13	-5.1	0.00796
1	60358980	60392462	ENSG00000134716	CYP2J2	prostate	protein_coding	15	0.249083	1.78324e-05	0.561	0.00794
12	66517697	66563765	ENSG00000155957	TMBIM4	esophagus_muscularis	protein_coding	31	0.0636831	8.81201e-05	-1.68	0.00794
18	596988	650334	ENSG00000079101	CLUL1	ovary	protein_coding	35	0.0727841	0.0705253	-2.03	0.00794
1	58881056	59012474	ENSG00000162600	OMA1	adipose_visceral_omentum	protein_coding	15	0.0360768	0.217651	0.469	0.00792
1	233086351	233119628	ENSG00000135778	NTPCR	artery_aorta	protein_coding	15	0.132884	1.46963e-09	0.418	0.00792
10	78629359	79398353	ENSG00000156113	KCNMA1	brain_amygdala	protein_coding	32	0.151904	0.00198737	-1.01	0.00792
8	31496902	32622548	ENSG00000157168	NRG1	adipose	protein_coding	10	0.0599459	2.44103e-09	-6.56	0.00792
9	18927656	19033251	ENSG00000155875	FAM154A	skin_sun_exposed_lower_leg	protein_coding	30	0.0134945	0.191583	-4.65	0.00792
1	233086351	233119628	ENSG00000135778	NTPCR	brain_hippocampus	protein_coding	15	0.242667	6.46313e-10	0.78	0.00791
3	170136653	170578169	ENSG00000013297	CLDN11	adipose	protein_coding	50	0.0910302	1.63628e-13	-1.92	0.00791
5	111478138	111755013	ENSG00000129595	EPB41L4A	adipose_visceral_omentum	protein_coding	20	0.149106	1.25083e-07	-3.72	0.00791
9	19108373	19149288	ENSG00000147872	PLIN2	adipose	protein_coding	30	0.0887778	3.311e-13	-1.39	0.00791
1	60280458	60342050	ENSG00000134709	HOOK1	whole_blood	protein_coding	15	0.0134042	0.220931	0.477	0.0079
1	6.11487e+07	6.11487e+07	ENSG00000231816.1	RP4-782L23.1	skin_sun_exposed_lower_leg	lincRNA	15	0.0107056	0.0674407	0.0455	0.00788
1	240931554	241520530	ENSG00000182901	RGS7	cells_transformed_fibroblasts	protein_coding	36	0.138314	9.21883e-08	1.21	0.00788
7	127292234	127732661	ENSG00000197157	SND1	muscle_skeletal	protein_coding	20	0.0718556	1.31603e-09	-0.0905	0.00788
12	65563351	65642107	ENSG00000174106	LEMD3	adipose_subcutaneous	protein_coding	31	0.0507649	0.0151591	0.746	0.00787
19	21473962	21512227	ENSG00000182141	ZNF708	esophagus_gastroesophageal_junction	protein_coding	77	0.0530916	0.00612224	0.866	0.00787
1	58881056	59012474	ENSG00000162600	OMA1	muscle_skeletal	protein_coding	15	0.205287	2.85168e-23	0.436	0.00785
1	244515937	244552965	ENSG00000173728	C1orf100	brain_spinal_cord_cervical_c-1	protein_coding	36	0.0396614	0.130158	1.6	0.00784
5	443273	472052	ENSG00000180104	EXOC3	esophagus_gastroesophageal_junction	protein_coding	36	0.237522	8.23474e-12	2.98	0.00784
15	66585555	66626236	ENSG00000166938	DIS3L	skin_not_sun_exposed_suprapubic	protein_coding	30	0.030028	0.0450851	9.02	0.00783
1	241815580	241965435	ENSG00000162843	WDR64	brain_frontal_cortex_ba9	protein_coding	36	-0.0609708	0.283307	-1.18	0.00782
1	241753404	241840678	ENSG00000054277	OPN3	breast_mammary_tissue	protein_coding	36	0.0999295	2.49654e-05	-1.18	0.00782
10	77360998	78319925	ENSG00000148655	C10orf11	brain_nucleus_accumbens_basal_ganglia	protein_coding	32	0.131128	0.00024321	0.982	0.00782
15	66782473	66790151	ENSG00000174446	SNAPC5	thyroid	protein_coding	30	0.0986438	7.72654e-11	-0.185	0.00782
1	243287729	243418708	ENSG00000143702	CEP170	brain_dorsolateral_prefrontal_cortex	protein_coding	36	0.028253	0.000194821	-2.94	0.0078
5	642532	642532	ENSG00000268885.1	AC026740.1	lung	protein_coding	36	0.105502	5.06438e-11	1.32	0.0078
5	112849380	112930982	ENSG00000047188	YTHDC2	brain_cortex	protein_coding	20	0.095722	0.03166	-1.08	0.0078
1	62208149	62629592	ENSG00000132849	INADL	heart_left_ventricle	protein_coding	15	0.0777205	0.000374506	0.561	0.00779
10	79490524	79494527	ENSG00000213514	RP11-428P16.2	artery_tibial	pseudogene	32	0.0453698	0.00237153	-0.941	0.00779
15	40731920	40760441	ENSG00000140320	BAHD1	nerve_tibial	protein_coding	47	0.0866508	7.08085e-05	-4.34	0.00779
1	233086351	233119628	ENSG00000135778	NTPCR	spleen	protein_coding	15	0.281393	7.57301e-06	0.412	0.00778
15	66628544	66679084	ENSG00000075131	TIPIN	esophagus_muscularis	protein_coding	30	0.281459	1.9206e-21	-1.84	0.00778
10	104209594	104211300	ENSG00000120055	C10orf95	adipose_subcutaneous	protein_coding	63	0.04705	0.0107972	1.44	0.00776
16	80631803	80838226	ENSG00000166446	CDYL2	skin_not_sun_exposed_suprapubic	protein_coding	19	0.0199268	0.0477754	1.3	0.00776
3	171318195	171528740	ENSG00000075651	PLD1	esophagus_mucosa	protein_coding	50	0.0135726	0.270733	-1.25	0.00776
9	19108373	19149288	ENSG00000147872	PLIN2	cells_transformed_fibroblasts	protein_coding	30	0.0163414	0.00304858	-0.0233	0.00776
10	104503727	104576021	ENSG00000166272	WBP1L	artery_aorta	protein_coding	63	0.0454043	0.000671228	1.43	0.00775
1	233086351	233119628	ENSG00000135778	NTPCR	adipose_visceral_omentum	protein_coding	15	0.30917	6.41266e-22	0.53	0.00774
12	64836290	64837110	ENSG00000255566	RP11-114F3.5	artery_aorta	pseudogene	31	0.0283916	0.110941	1.64	0.00774
1	59041099	59043166	ENSG00000184292	TACSTD2	testis	protein_coding	15	0.0303919	0.0797241	0.567	0.00773
5	612387	667283	ENSG00000112877	CEP72	esophagus_gastroesophageal_junction	protein_coding	36	0.0902781	2.46534e-06	-2.07	0.00773
1	60358980	60392462	ENSG00000134716	CYP2J2	breast_mammary_tissue	protein_coding	15	0.0913674	0.00280032	0.436	0.00772
10	8.01625e+07	8.01625e+07	ENSG00000227136.2	LINC00595	brain_caudate_basal_ganglia	lincRNA	32	0.0597391	0.106559	-0.943	0.00772
1	59246115	59246115	ENSG00000232453.1	RP4-794H19.1	brain_spinal_cord_cervical_c-1	lincRNA	15	0.310378	0.0152047	-0.509	0.00769
1	59377673	59377673	ENSG00000232453.1	RP4-794H19.1	adipose_subcutaneous	lincRNA	15	0.0617824	0.00316243	0.605	0.00769
1	62146718	62191095	ENSG00000162604	TM2D1	skin_not_sun_exposed_suprapubic	protein_coding	15	0.0541312	3.03766e-05	-0.481	0.00767
3	169201459	169201868	ENSG00000213178	RP11-641D5.1	adipose_subcutaneous	pseudogene	50	-0.017318	0.0435373	1.11	0.00766
1	59003980	59003980	ENSG00000185839.2	RP4-592A1.2	thyroid	pseudogene	15	0.0512951	0.0036996	-0.501	0.00764
1	243419320	243663394	ENSG00000054282	SDCCAG8	adipose	protein_coding	36	0.144504	5.56013e-21	6.13	0.00764
10	103585731	103603677	ENSG00000120049	KCNIP2	muscle_skeletal	protein_coding	63	0.0263122	0.00779715	-1.42	0.00763
12	66517697	66563765	ENSG00000155957	TMBIM4	heart_left_ventricle	protein_coding	31	0.183832	4.22418e-11	-1.52	0.00763
1	62146718	62191095	ENSG00000162604	TM2D1	adrenal_gland	protein_coding	15	0.0971712	0.113932	0.453	0.00762
19	6426048	6433790	ENSG00000181240	SLC25A41	artery_tibial	protein_coding	69	0.451787	5.4991e-43	0.928	0.00761
1	60358980	60392462	ENSG00000134716	CYP2J2	brain_cortex	protein_coding	15	0.103229	0.000361688	0.431	0.0076
15	40331512	40359491	ENSG00000248508	SRP14-AS1	artery_tibial	lincRNA	47	0.283209	1.01594e-23	-4.21	0.00759
19	5691845	5720583	ENSG00000196365	LONP1	breast_mammary_tissue	protein_coding	69	0.195657	3.69745e-07	2.2	0.00759
19	5784843	5791249	ENSG00000141994	DUS3L	pituitary	protein_coding	69	0.376289	6.5965e-11	2.17	0.00758
19	22630424	22630424	ENSG00000269364.1	CTC-457E21.2	thyroid	lincRNA	77	0.192481	2.42352e-15	-4.08	0.00758
10	77360998	78319925	ENSG00000148655	C10orf11	colon_sigmoid	protein_coding	32	0.109542	3.11969e-07	-0.846	0.00757
1	58881056	59012474	ENSG00000162600	OMA1	adipose_subcutaneous	protein_coding	15	0.070959	1.04042e-06	-0.395	0.00754
12	66696325	66737423	ENSG00000127311	HELB	pituitary	protein_coding	31	0.0519742	0.0268476	-1.74	0.00754
16	79831947	79861047	ENSG00000261082	RP11-345M22.3	testis	lincRNA	19	0.060896	0.102684	0.00631	0.00754
1	61330931	61928465	ENSG00000162599	NFIA	adipose_subcutaneous	protein_coding	15	0.0212639	0.0752986	-0.426	0.00753
5	1614951	1616449	ENSG00000232615	CTD-2012J19.1	brain_hypothalamus	pseudogene	36	0.13526	0.294484	1.93	0.00753
1	231762561	232177018	ENSG00000162946	DISC1	adrenal_gland	protein_coding	15	0.0207712	0.000341955	-0.905	0.00752
15	66782473	66790151	ENSG00000174446	SNAPC5	esophagus_muscularis	protein_coding	30	0.0306096	0.0388964	1.77	0.00752
10	77360998	78319925	ENSG00000148655	C10orf11	colon_transverse	protein_coding	32	0.174467	6.01566e-11	1	0.00751
3	169511216	169530774	ENSG00000171757	LRRC34	esophagus_muscularis	protein_coding	50	0.106533	1.26796e-08	5.35	0.00751
1	232533711	232697304	ENSG00000116991	SIPA1L2	adipose	protein_coding	15	0.0115669	0.00614391	-1.04	0.0075
1	231376953	231413719	ENSG00000116906	GNPAT	skin_sun_exposed_lower_leg	protein_coding	15	0.306411	1.5201e-26	-1.04	0.0075
1	60456066	60538348	ENSG00000162598	C1orf87	blood	protein_coding	15	0.00172195	0.0764481	-0.387	0.00749
1	233119181	233431459	ENSG00000135749	PCNXL2	skin_sun_exposed_lower_leg	protein_coding	15	0.0887005	3.92896e-09	-1.07	0.00748
15	40820882	40857256	ENSG00000128891	C15orf57	brain_spinal_cord_cervical_c-1	protein_coding	47	0.148382	1.48283e-05	1.86	0.00748
16	81040103	81066719	ENSG00000166451	CENPN	spleen	protein_coding	19	0.0934747	0.000416766	-0.801	0.00748
16	81040103	81066719	ENSG00000166451	CENPN	adipose_visceral_omentum	protein_coding	19	0.0368036	0.0246149	-0.801	0.00748
5	111478138	111755013	ENSG00000129595	EPB41L4A	colon_sigmoid	protein_coding	20	-0.00260081	0.104545	-2.37	0.00746
3	171518678	171518678	ENSG00000183657.2	PP13439	adipose_subcutaneous	protein_coding	50	0.207978	5.53161e-17	1.67	0.00743
12	66517697	66563765	ENSG00000155957	TMBIM4	stomach	protein_coding	31	0.249738	6.42577e-11	-1.74	0.00742
16	71671738	71758604	ENSG00000040199	PHLPP2	lung	protein_coding	59	0.180835	4.7496e-16	-1.92	0.00742
8	33218361	33218933	ENSG00000272338	RP11-722E23.2	esophagus_muscularis	lincRNA	10	0.091506	2.07874e-06	-0.963	0.00742
16	71671738	71758604	ENSG00000040199	PHLPP2	skin_sun_exposed_lower_leg	protein_coding	59	0.0631218	5.14738e-06	-1.83	0.00741
16	71392616	71424341	ENSG00000172137	CALB2	heart_atrial_appendage	protein_coding	59	0.0922155	1.52769e-05	-1.82	0.00741
1	60452941	60539442	ENSG00000162598	C1orf87	testis	protein_coding	15	0.0339153	0.0020864	-0.401	0.00737
5	111956417	111956417	ENSG00000268358.1	EPB41L4A-AS2	brain_cerebellum	protein_coding	20	0.0226037	0.208401	1.67	0.00737
10	79490524	79494527	ENSG00000213514	RP11-428P16.2	colon_transverse	pseudogene	32	0.0379346	0.195313	-1.02	0.00735
10	104238986	104262482	ENSG00000138107	ACTR1A	brain_spinal_cord_cervical_c-1	protein_coding	63	0.136413	0.0357418	1.37	0.00735
6	42928496	42931618	ENSG00000124713	GNMT	vagina	protein_coding	32	0.167591	0.000973505	-3.34	0.00735
16	79741569	79741569	ENSG00000261390.1	RP11-345M22.2	heart_atrial_appendage	lincRNA	19	0.135268	1.72486e-07	-3.31	0.00734
19	21892324	21892993	ENSG00000268535	RP11-420K14.3	esophagus_mucosa	pseudogene	77	0.233298	6.81059e-19	-2.92	0.00734
1	62208149	62629592	ENSG00000132849	INADL	heart_atrial_appendage	protein_coding	15	0.119207	4.12079e-05	-0.392	0.00733
16	71481500	71496998	ENSG00000167377	ZNF23	brain_caudate_basal_ganglia	protein_coding	59	0.10155	0.000213658	-1.13	0.00733
10	79550549	79686378	ENSG00000151208	DLG5	brain_cerebellar_hemisphere	protein_coding	32	0.182565	0.0281565	0.837	0.00731
12	66517709	66563852	ENSG00000155957	TMBIM4	adipose	protein_coding	31	0.095294	4.29231e-14	-1.67	0.00731
15	40623653	40633168	C15orf52	C15orf52	adipose	NA	47	0.0261075	7.04234e-05	-4.57	0.00731
16	72816784	73093597	ENSG00000140836	ZFHX3	prostate	protein_coding	59	0.00118737	0.141401	1.2	0.00731
16	78133310	79246564	ENSG00000186153	WWOX	lung	protein_coding	19	0.145376	4.46067e-12	-1.64	0.00729
19	22115760	22193751	ENSG00000160321	ZNF208	artery_tibial	protein_coding	77	0.185868	1.07587e-13	-0.921	0.00728
1	58881056	59012474	ENSG00000162600	OMA1	thyroid	protein_coding	15	0.122448	8.69399e-09	0.0439	0.00727
15	68560130	68570332	ENSG00000260657	RP11-315D16.4	prostate	lincRNA	30	0.260602	0.000161304	1.06	0.00727
16	71671738	71758604	ENSG00000040199	PHLPP2	cells_transformed_fibroblasts	protein_coding	59	0.0872317	3.86051e-05	-1.85	0.00726
5	288948	290436	ENSG00000250848	CTD-2083E4.5	prostate	pseudogene	36	0.0108075	0.180729	-3.57	0.00726
1	62207670	62208096	ENSG00000271200	RP11-430G17.3	brain_cerebellar_hemisphere	lincRNA	15	0.072732	0.0282516	-0.378	0.00725
5	111018031	111018031	ENSG00000268358.1	EPB41L4A-AS2	brain_spinal_cord_cervical_c-1	protein_coding	20	0.0622818	0.307266	-3.23	0.00725
1	233086351	233119628	ENSG00000135778	NTPCR	cells_transformed_fibroblasts	protein_coding	15	0.447468	2.39367e-31	0.433	0.00724
12	66517697	66563765	ENSG00000155957	TMBIM4	brain_frontal_cortex_ba9	protein_coding	31	0.161863	0.0016684	-1.6	0.00724
1	59120411	59165764	ENSG00000162601	MYSM1	skin_not_sun_exposed_suprapubic	protein_coding	15	0.0155325	0.0240471	-0.326	0.00723
1	59754975	59755312	ENSG00000270457	RP11-467C18.1	artery_tibial	lincRNA	15	0.0815569	1.4939e-05	-0.42	0.00722
1	62207670	62208096	ENSG00000271200	RP11-430G17.3	minor_salivary_gland	lincRNA	15	0.0592424	0.20108	-0.255	0.00722
1	233086351	233119628	ENSG00000135778	NTPCR	adipose	protein_coding	15	0.255247	5.85251e-38	0.495	0.00722
15	67835047	68099461	ENSG00000137764	MAP2K5	colon_sigmoid	protein_coding	30	0.147488	8.79169e-06	1.11	0.00722
10	77360998	78319925	ENSG00000148655	C10orf11	esophagus_mucosa	protein_coding	32	0.195579	2.02024e-12	-0.752	0.00721
18	596988	650334	ENSG00000079101	CLUL1	brain_hippocampus	protein_coding	35	0.0259616	0.0395413	-2.81	0.0072
10	78629359	79398353	ENSG00000156113	KCNMA1	cells_transformed_fibroblasts	protein_coding	32	0.213762	8.23625e-11	-0.844	0.00719
12	65563351	65642107	ENSG00000174106	LEMD3	heart_left_ventricle	protein_coding	31	0.15513	4.44768e-09	0.651	0.00719
1	59463324	59463324	ENSG00000230812.1	RP4-794H19.4	artery_aorta	lincRNA	15	0.0932612	0.000383272	-0.291	0.00718
1	58881056	59012474	ENSG00000162600	OMA1	esophagus_mucosa	protein_coding	15	0.12664	9.01024e-07	0.133	0.00718
6	42928496	42931618	ENSG00000124713	GNMT	brain_putamen_basal_ganglia	protein_coding	32	0.364676	3.32846e-11	-2.92	0.00718
1	231664399	231702270	ENSG00000116918	TSNAX	brain_hippocampus	protein_coding	15	0.0600964	0.14845	0.731	0.00716
15	40731920	40760441	ENSG00000140320	BAHD1	adipose	protein_coding	47	0.052727	2.20476e-08	-4.47	0.00716
16	78133310	79246564	ENSG00000186153	WWOX	adipose_subcutaneous	protein_coding	19	0.26823	5.91779e-26	-0.134	0.00716
19	6212966	6279959	ENSG00000130382	MLLT1	artery_tibial	protein_coding	69	-0.000290117	0.0526292	2.23	0.00716
19	5674958	5691887	ENSG00000130255	RPL36	brain_cerebellum	protein_coding	69	0.173642	0.10311	2.23	0.00716
19	5691845	5720583	ENSG00000196365	LONP1	whole_blood	protein_coding	69	0.0405684	0.00162515	2.23	0.00716
3	171504273	171504273	ENSG00000183657.2	PP13439	thyroid	protein_coding	50	0.0857676	8.10916e-07	-1.36	0.00716
3	171508977	171508977	ENSG00000183657.2	PP13439	breast_mammary_tissue	protein_coding	50	0.0701814	0.000726754	-1.36	0.00716
1	59762310	60233347	ENSG00000172456	FGGY	ovary	protein_coding	15	0.0696841	0.00170218	-0.283	0.00714
1	59125683	59125683	ENSG00000232453.1	RP4-794H19.1	artery_tibial	lincRNA	15	0.0655935	0.000823394	-0.385	0.00713
16	78133310	79246564	ENSG00000186153	WWOX	muscle_skeletal	protein_coding	19	0.0412034	0.00115159	1.6	0.00713
19	21324827	21373034	ENSG00000196705	ZNF431	stomach	protein_coding	77	0.08019	0.00880449	2.06	0.00713
16	79742193	79742193	ENSG00000261390.1	RP11-345M22.2	pancreas	lincRNA	19	0.0796077	0.0192919	-4.45	0.00712
12	66217911	66360075	ENSG00000149948	HMGA2	cells_transformed_fibroblasts	protein_coding	31	0.00508215	0.0265333	1.71	0.00711
1	60358980	60392462	ENSG00000134716	CYP2J2	thyroid	protein_coding	15	0.0158939	0.129692	0.181	0.0071
1	60280458	60342050	ENSG00000134709	HOOK1	adipose_visceral_omentum	protein_coding	15	0.0115851	0.0694266	-0.221	0.00709
3	169511216	169530774	ENSG00000171757	LRRC34	colon_transverse	protein_coding	50	0.0270889	0.000152258	5.02	0.00709
1	58881056	59012474	ENSG00000162600	OMA1	nerve_tibial	protein_coding	15	0.228107	5.69001e-14	0.372	0.00708
1	62146718	62191095	ENSG00000162604	TM2D1	brain_hypothalamus	protein_coding	15	0.0532401	0.227353	-0.238	0.00708
10	79540095	79541634	ENSG00000213513	RP13-39P12.2	stomach	pseudogene	32	0.0942024	1.07076e-06	-0.831	0.00707
16	71879894	71919171	ENSG00000224470	ATXN1L	adrenal_gland	protein_coding	59	-0.0237685	0.314529	1.41	0.00707
10	79550549	79686378	ENSG00000151208	DLG5	pancreas	protein_coding	32	0.540343	4.13866e-31	-0.7	0.00706
16	70514471	70557468	ENSG00000103051	COG4	muscle_skeletal	protein_coding	59	0.139007	1.31068e-15	2.05	0.00706
16	78133310	79246564	ENSG00000186153	WWOX	cells_transformed_fibroblasts	protein_coding	19	0.0157822	0.000219967	1.41	0.00706
1	59041099	59043166	ENSG00000184292	TACSTD2	muscle_skeletal	protein_coding	15	0.0138306	0.0340486	-0.0477	0.00705
16	79710005	79841819	ENSG00000260876	RP11-345M22.1	thyroid	lincRNA	19	0.095503	3.40566e-08	1.35	0.00705
1	58881056	59012474	ENSG00000162600	OMA1	testis	protein_coding	15	0.0304643	0.138508	-0.174	0.00703
1	233086351	233119628	ENSG00000135778	NTPCR	skin_not_sun_exposed_suprapubic	protein_coding	15	0.376721	1.24425e-29	0.645	0.00703
1	242158792	242162375	ENSG00000197769	MAP1LC3C	brain_cerebellum	protein_coding	36	0.107699	0.0336328	-1.45	0.00703
16	71893583	71929239	ENSG00000102984	ZNF821	breast_mammary_tissue	protein_coding	59	0.0260682	0.151909	3.18	0.00703
3	170075466	170114623	ENSG00000136603	SKIL	whole_blood	protein_coding	50	0.0173757	0.309328	1.52	0.00701
5	111478138	111755013	ENSG00000129595	EPB41L4A	adipose	protein_coding	20	0.0153932	0.0018652	-3.62	0.00701
1	59754975	59755312	ENSG00000270457	RP11-467C18.1	artery_aorta	lincRNA	15	0.0979394	6.1503e-10	-0.0625	0.00699
1	231376953	231413719	ENSG00000116906	GNPAT	esophagus_muscularis	protein_coding	15	0.097804	3.64707e-06	0.917	0.00699
1	62208149	62629592	ENSG00000132849	INADL	brain_cerebellar_hemisphere	protein_coding	15	0.132494	0.00135615	-0.255	0.00698
1	231041989	231114621	ENSG00000143643	TTC13	skin_sun_exposed_lower_leg	protein_coding	15	0.14942	2.35861e-12	-0.897	0.00697
1	231154704	231175992	ENSG00000182118	FAM89A	brain_cortex	protein_coding	15	0.307849	9.15012e-10	0.897	0.00697
19	22235254	22274282	ENSG00000197134	ZNF257	artery_tibial	protein_coding	77	0.302979	1.92689e-19	3.45	0.00697
9	19230433	19374139	ENSG00000137145	DENND4C	adipose_visceral_omentum	protein_coding	30	0.0428644	0.0138015	1.77	0.00697
9	19108373	19149288	ENSG00000147872	PLIN2	blood	protein_coding	30	0.252544	5.34108e-82	-0.169	0.00697
1	62208149	62629592	ENSG00000132849	INADL	brain_cerebellum	protein_coding	15	0.0342917	0.0334082	0.0176	0.00696
1	60358980	60392462	ENSG00000134716	CYP2J2	esophagus_mucosa	protein_coding	15	0.0558737	0.00219397	-0.174	0.00695
1	242246288	242687998	ENSG00000180287	PLD5	pituitary	protein_coding	36	0.329178	6.59448e-17	-0.504	0.00695
16	80631803	80838226	ENSG00000166446	CDYL2	artery_tibial	protein_coding	19	0.046343	0.00174149	-0.138	0.00695
1	59439968	59439968	ENSG00000230812.1	RP4-794H19.4	colon_transverse	lincRNA	15	0.0016384	0.00868602	0.108	0.00693
1	60358980	60392462	ENSG00000134716	CYP2J2	minor_salivary_gland	protein_coding	15	0.140429	0.221029	0.0297	0.00693
1	233119181	233431459	ENSG00000135749	PCNXL2	esophagus_muscularis	protein_coding	15	0.00305284	0.0188904	1.04	0.00692
1	231114727	231136341	ENSG00000173409	ARV1	colon_transverse	protein_coding	15	0.168656	7.00868e-09	-0.895	0.00691
15	68560130	68570332	ENSG00000260657	RP11-315D16.4	brain_spinal_cord_cervical_c-1	lincRNA	30	0.21274	0.000138375	1.23	0.00691
6	42847356	42857663	ENSG00000146223	RPL7L1	testis	protein_coding	32	0.20654	2.36739e-09	2.91	0.00691
19	7557862	7573336	ENSG00000198723	C19orf45	esophagus_muscularis	protein_coding	69	0.0116514	0.020103	1.94	0.0069
1	243418907	243663392	ENSG00000054282	SDCCAG8	blood	protein_coding	36	0.0108467	0.000137296	5.59	0.00689
8	33342268	33358778	ENSG00000198042	MAK16	brain_anterior_cingulate_cortex_ba24	protein_coding	10	0.0321098	0.190964	-0.898	0.00689
1	59754975	59755312	ENSG00000270457	RP11-467C18.1	artery_coronary	lincRNA	15	0.0626197	0.15235	0.0423	0.00688
19	5691845	5720583	ENSG00000196365	LONP1	ovary	protein_coding	69	0.195692	0.00073415	1.13	0.00688
5	112196919	112205485	ENSG00000153037	SRP19	brain_hypothalamus	protein_coding	20	-0.0435114	0.0375166	-2.45	0.00688
1	58881056	59012474	ENSG00000162600	OMA1	brain_amygdala	protein_coding	15	0.175395	0.00217077	-0.0407	0.00687
1	231359509	231376933	ENSG00000143633	C1orf131	skin_sun_exposed_lower_leg	protein_coding	15	0.0266785	0.00205029	0.92	0.00686
1	243419320	243663394	ENSG00000054282	SDCCAG8	brain_cerebellum	protein_coding	36	0.151381	9.69477e-05	5.6	0.00686
1	60358980	60392462	ENSG00000134716	CYP2J2	brain_nucleus_accumbens_basal_ganglia	protein_coding	15	0.0976776	0.00596976	0.0171	0.00685
1	5.90028e+07	5.90028e+07	ENSG00000232453.1	RP4-794H19.1	muscle_skeletal	lincRNA	15	0.0317652	0.00252181	-0.0746	0.00683
10	77360998	78319925	ENSG00000148655	C10orf11	stomach	protein_coding	32	0.0778156	5.13295e-05	-0.854	0.00682
15	68112042	68126899	ENSG00000188779	SKOR1	adipose	protein_coding	30	0.0446439	2.56631e-07	1.68	0.00682
10	79490524	79494527	ENSG00000213514	RP11-428P16.2	prostate	pseudogene	32	-0.0194658	0.0933015	0.743	0.00681
5	112043195	112181936	ENSG00000134982	APC	muscle_skeletal	protein_coding	20	0.0624626	0.000358224	2.02	0.00681
15	40820882	40857256	ENSG00000128891	C15orf57	small_intestine_terminal_ileum	protein_coding	47	0.260307	4.72923e-07	3.22	0.0068
8	32411207	32411207	ENSG00000272327.1	RP11-1002K11.1	lung	lincRNA	10	0.0401903	0.0194206	1.47	0.0068
9	21321299	21321826	ENSG00000226393	IFNA20P	nerve_tibial	pseudogene	30	0.0366027	0.0727838	1.4	0.0068
1	60452941	60539442	ENSG00000162598	C1orf87	artery_coronary	protein_coding	15	-0.012809	0.0627445	-0.0192	0.00679
12	65812511	65813807	ENSG00000215208	KRT18P60	heart_atrial_appendage	pseudogene	31	0.00766462	0.026418	1.24	0.00679
1	233086351	233119628	ENSG00000135778	NTPCR	adrenal_gland	protein_coding	15	0.282328	1.6728e-09	0.0842	0.00676
19	5916150	5978153	ENSG00000031823	RANBP3	brain_cerebellar_hemisphere	protein_coding	69	-0.00756704	0.0535149	1.78	0.00675
1	233086351	233119628	ENSG00000135778	NTPCR	brain_caudate_basal_ganglia	protein_coding	15	0.287838	2.44098e-10	-0.0726	0.00674
1	243419320	243663394	ENSG00000054282	SDCCAG8	artery_tibial	protein_coding	36	0.0777305	8.07597e-09	5.84	0.00674
5	111478138	111755013	ENSG00000129595	EPB41L4A	whole_blood	protein_coding	20	0.0272868	0.0356466	0.963	0.00674
8	30891317	31031285	ENSG00000165392	WRN	cells_ebv-transformed_lymphocytes	protein_coding	10	0.0640842	0.255563	0.783	0.00674
1	233086351	233119628	ENSG00000135778	NTPCR	testis	protein_coding	15	0.316687	3.71516e-17	0.182	0.00672
6	44238203	44275243	ENSG00000178233	TMEM151B	ovary	protein_coding	32	0.0191051	0.244895	-2.89	0.00672
10	104503727	104576021	ENSG00000166272	WBP1L	ovary	protein_coding	63	-0.017125	0.276599	1.17	0.00671
15	67835020	68099455	ENSG00000137764	MAP2K5	brain_dorsolateral_prefrontal_cortex	protein_coding	30	0.0768722	1.21043e-09	1.28	0.0067
1	231359509	231376933	ENSG00000143633	C1orf131	brain_cerebellum	protein_coding	15	0.0156028	0.0273695	0.983	0.00669
10	79550549	79686378	ENSG00000151208	DLG5	spleen	protein_coding	32	0.400386	5.6867e-13	0.911	0.00668
16	71671738	71758604	ENSG00000040199	PHLPP2	adipose	protein_coding	59	0.0611671	1.68056e-09	-1.77	0.00668
16	71671738	71758604	ENSG00000040199	PHLPP2	colon_sigmoid	protein_coding	59	0.114853	0.000131538	-2.11	0.00667
18	596988	650334	ENSG00000079101	CLUL1	esophagus_muscularis	protein_coding	35	0.187474	9.23329e-13	-1.4	0.00667
15	68560130	68570332	ENSG00000260657	RP11-315D16.4	testis	lincRNA	30	0.416246	9.91627e-22	1.27	0.00664
16	78133310	79246564	ENSG00000186153	WWOX	colon_transverse	protein_coding	19	0.200895	1.11695e-06	-1.17	0.00664
9	20658308	20995954	ENSG00000188352	FOCAD	vagina	protein_coding	30	-0.00406945	0.104354	1.07	0.00662
10	105206543	105212660	ENSG00000138172	CALHM2	colon_transverse	protein_coding	63	0.0474084	0.00174787	1.54	0.00661
15	68560130	68570332	ENSG00000260657	RP11-315D16.4	breast_mammary_tissue	lincRNA	30	0.216208	5.96757e-10	1.26	0.0066
1	243419320	243663394	ENSG00000054282	SDCCAG8	cells_ebv-transformed_lymphocytes	protein_coding	36	0.315367	2.63179e-07	3.98	0.00658
1	243419320	243663394	ENSG00000054282	SDCCAG8	brain_substantia_nigra	protein_coding	36	0.0662178	0.00383825	2.12	0.00658
10	79540095	79541634	ENSG00000213513	RP13-39P12.2	cells_transformed_fibroblasts	pseudogene	32	0.0541526	0.0125044	-0.85	0.00658
12	66044284	66044284	ENSG00000256268.1	RP11-221N13.3	colon_transverse	lincRNA	31	0.0401235	0.121677	-0.209	0.00657
1	232533711	232697304	ENSG00000116991	SIPA1L2	stomach	protein_coding	15	0.0233738	0.00697211	-0.749	0.00654
5	1614951	1616449	ENSG00000232615	CTD-2012J19.1	heart_atrial_appendage	pseudogene	36	0.0677137	0.000427701	1.88	0.00654
1	232940643	232946092	ENSG00000212916	MAP10	adipose_subcutaneous	protein_coding	15	0.0453329	2.47371e-05	0.79	0.00653
1	233463514	233520894	ENSG00000143674	MLK4	skin_not_sun_exposed_suprapubic	protein_coding	15	0.420959	1.2568e-35	0.956	0.00653
16	71671738	71758604	ENSG00000040199	PHLPP2	esophagus_mucosa	protein_coding	59	0.0374173	0.00120342	-1.63	0.00653
1	233086351	233119628	ENSG00000135778	NTPCR	ovary	protein_coding	15	-0.0747052	0.00354793	0.808	0.00651
16	81069452	81080963	ENSG00000166454	ATMIN	uterus	protein_coding	19	0.0993263	0.0121089	-0.303	0.00651
8	33448856	33457624	ENSG00000133878	DUSP26	muscle_skeletal	protein_coding	10	0.060628	6.42879e-08	-2.1	0.00651
10	105156405	105206049	ENSG00000148843	PDCD11	adipose_visceral_omentum	protein_coding	63	0.0803755	1.26048e-05	-1.53	0.00649
10	104153867	104162281	ENSG00000077150	NFKB2	colon_sigmoid	protein_coding	63	0.00174793	0.0612807	-1.48	0.00649
19	22357568	22357993	ENSG00000269345	VN1R85P	nerve_tibial	pseudogene	77	0.0202936	0.00185335	5.34	0.00648
8	30853321	30891231	ENSG00000172733	PURG	thyroid	protein_coding	10	0.00852987	0.0231874	1.38	0.00648
5	438564	438564	ENSG00000221990.2	C5orf55	adipose_visceral_omentum	protein_coding	36	0.176244	2.21669e-12	-2.03	0.00647
1	243419320	243663394	ENSG00000054282	SDCCAG8	whole_blood	protein_coding	36	0.223754	1.54859e-15	4.46	0.00646
1	243419320	243663394	ENSG00000054282	SDCCAG8	cells_transformed_fibroblasts	protein_coding	36	0.357591	4.48346e-23	5.67	0.00646
16	78859178	78859903	ENSG00000243101	RPS3P7	brain_cerebellum	pseudogene	19	0.0229889	0.249258	1.32	0.00646
10	104221149	104236802	ENSG00000138111	TMEM180	vagina	protein_coding	63	0.0487413	0.0109538	1.54	0.00645
10	79550549	79686378	ENSG00000151208	DLG5	prostate	protein_coding	32	0.0866779	0.00143895	0.707	0.00644
10	79550549	79686378	ENSG00000151208	DLG5	brain_caudate_basal_ganglia	protein_coding	32	0.123307	0.0258252	-0.777	0.00643
16	80966844	80966844	ENSG00000260896.1	RP11-314O13.1	brain_hypothalamus	lincRNA	19	0.206762	0.0436159	-0.813	0.00643
16	72042487	72058954	ENSG00000102967	DHODH	prostate	protein_coding	59	0.093331	0.0228718	0.54	0.00642
5	1456595	1524092	ENSG00000153395	LPCAT1	brain_cerebellum	protein_coding	36	0.215399	1.99432e-07	-2.34	0.00642
5	112357796	112824527	ENSG00000171444	MCC	ovary	protein_coding	20	0.133201	1.16731e-06	-2.82	0.00642
5	112312399	112356667	ENSG00000172795	DCP2	spleen	protein_coding	20	0.0477041	0.00597187	1.24	0.00641
1	232533711	232697304	ENSG00000116991	SIPA1L2	brain_putamen_basal_ganglia	protein_coding	15	0.105879	0.00485566	0.879	0.0064
1	233086351	233119628	ENSG00000135778	NTPCR	pituitary	protein_coding	15	0.101946	0.000398639	0.706	0.00637
1	243419320	243663394	ENSG00000054282	SDCCAG8	breast_mammary_tissue	protein_coding	36	0.0424924	0.0275327	5.81	0.00637
9	19230433	19374139	ENSG00000137145	DENND4C	liver	protein_coding	30	0.00928086	4.37053e-05	0.988	0.00637
10	79550549	79686378	ENSG00000151208	DLG5	muscle_skeletal	protein_coding	32	0.107959	1.21706e-08	0.74	0.00636
12	66517697	66563765	ENSG00000155957	TMBIM4	muscle_skeletal	protein_coding	31	0.0440929	1.24026e-05	-1.56	0.00636
16	78133310	79246564	ENSG00000186153	WWOX	spleen	protein_coding	19	0.0692381	0.0299801	0.755	0.00636
19	22235254	22274282	ENSG00000197134	ZNF257	lung	protein_coding	77	0.321472	5.05342e-27	5.4	0.00636
1	241753404	241840678	ENSG00000054277	OPN3	muscle_skeletal	protein_coding	36	0.134749	4.77742e-15	1.45	0.00635
19	22235254	22274282	ENSG00000197134	ZNF257	brain_amygdala	protein_coding	77	0.17479	0.0337122	5.89	0.00635
15	41099284	41106767	ENSG00000166140	ZFYVE19	spleen	protein_coding	47	0.119169	1.50089e-05	-3.46	0.00634
16	81040103	81066719	ENSG00000166451	CENPN	breast_mammary_tissue	protein_coding	19	-0.00328284	0.155673	0.321	0.00634
19	22235254	22274282	ENSG00000197134	ZNF257	brain_anterior_cingulate_cortex_ba24	protein_coding	77	0.216976	0.00258789	5.5	0.00634
15	66628544	66679084	ENSG00000075131	TIPIN	artery_tibial	protein_coding	30	0.222704	5.13055e-18	0.691	0.00633
1	241792155	241799232	ENSG00000203668	CHML	esophagus_gastroesophageal_junction	protein_coding	36	0.169194	1.20716e-06	-0.714	0.00632
6	42931608	42946958	ENSG00000124587	PEX6	colon_sigmoid	protein_coding	32	0.61848	1.05152e-35	2.19	0.00631
10	79490524	79494527	ENSG00000213514	RP11-428P16.2	testis	pseudogene	32	0.0766415	0.00147573	0.412	0.00629
16	71671738	71758604	ENSG00000040199	PHLPP2	artery_coronary	protein_coding	59	0.120719	0.000879581	-1.88	0.00629
1	233086351	233119628	ENSG00000135778	NTPCR	stomach	protein_coding	15	0.26869	2.89926e-13	0.51	0.00627
19	8645126	8675620	ENSG00000142303	ADAMTS10	testis	protein_coding	69	0.0383995	0.15684	1.97	0.00626
8	33228342	33330940	ENSG00000172728	FUT10	uterus	protein_coding	10	0.163671	6.47052e-05	1.57	0.00625
8	33579823	33580597	ENSG00000253569	VENTXP5	brain_frontal_cortex_ba9	pseudogene	10	0.0568704	0.0708569	0.127	0.00625
1	231376953	231413719	ENSG00000116906	GNPAT	thyroid	protein_coding	15	0.0545108	0.00256561	-0.864	0.00624
1	231472850	231490769	ENSG00000010072	SPRTN	testis	protein_coding	15	0.109465	0.00179386	-0.771	0.00622
16	79726421	79726421	ENSG00000261390.1	RP11-345M22.2	testis	lincRNA	19	0.410062	9.56413e-20	-3.43	0.00622
9	19053141	19103117	ENSG00000147874	HAUS6	testis	protein_coding	30	0.0410191	0.0213194	-4.36	0.00622
10	79550549	79686378	ENSG00000151208	DLG5	minor_salivary_gland	protein_coding	32	0.385633	1.29853e-07	0.655	0.00621
10	104221149	104236802	ENSG00000138111	TMEM180	artery_aorta	protein_coding	63	0.345402	1.11258e-21	1.51	0.00621
3	169684423	169716161	ENSG00000008952	SEC62	blood	protein_coding	50	0.0279416	1.36304e-09	-0.175	0.00621
5	1456595	1524092	ENSG00000153395	LPCAT1	adipose_subcutaneous	protein_coding	36	0.0716583	0.000608701	2.39	0.00621
9	20995306	21031635	ENSG00000188921	PTPLAD2	brain_nucleus_accumbens_basal_ganglia	protein_coding	30	0.0371019	0.0974047	0.938	0.00621
16	71481500	71496998	ENSG00000167377	ZNF23	liver	protein_coding	59	0.151812	2.76042e-06	-1.5	0.0062
18	596988	650334	ENSG00000079101	CLUL1	brain_cerebellum	protein_coding	35	0.0721837	0.0553467	-1.97	0.0062
8	33330904	33371119	ENSG00000129696	TTI2	uterus	protein_coding	10	0.112264	0.186776	3.78	0.0062
16	81040103	81066719	ENSG00000166451	CENPN	heart_atrial_appendage	protein_coding	19	0.100318	0.00015414	-0.0734	0.00618
5	111478138	111755013	ENSG00000129595	EPB41L4A	spleen	protein_coding	20	0.173582	2.60707e-09	-3.3	0.00618
1	243287730	243418650	ENSG00000143702	CEP170	cells_transformed_fibroblasts	protein_coding	36	0.240466	2.09466e-17	5.59	0.00616
10	104153867	104162281	ENSG00000077150	NFKB2	lung	protein_coding	63	0.0303808	0.00166278	1.48	0.00615
3	169940153	170023769	ENSG00000163558	PRKCI	brain_anterior_cingulate_cortex_ba24	protein_coding	50	0.00454166	0.0563447	-1.8	0.00615
5	660883	693510	ENSG00000171368	TPPP	brain_cortex	protein_coding	36	0.111924	4.40516e-05	-1.44	0.00615
1	231472850	231490769	ENSG00000010072	SPRTN	cells_ebv-transformed_lymphocytes	protein_coding	15	-0.0108726	0.077503	-0.846	0.00614
1	243419320	243663394	ENSG00000054282	SDCCAG8	brain_anterior_cingulate_cortex_ba24	protein_coding	36	0.0359098	0.210921	5.83	0.00614
1	233086351	233119628	ENSG00000135778	NTPCR	brain_cerebellar_hemisphere	protein_coding	15	0.176773	2.62514e-05	-0.0161	0.00613
1	233086351	233119628	ENSG00000135778	NTPCR	liver	protein_coding	15	0.170302	2.84512e-06	0.482	0.00613
16	81115566	81130008	ENSG00000140905	GCSH	brain_anterior_cingulate_cortex_ba24	protein_coding	19	0.0262132	0.00443997	-0.336	0.00612
5	111478138	111755013	ENSG00000129595	EPB41L4A	pancreas	protein_coding	20	0.144574	2.03439e-06	-3.15	0.00611
1	243287730	243418650	ENSG00000143702	CEP170	esophagus_muscularis	protein_coding	36	0.0252519	0.0467297	4.81	0.0061
10	77360998	78319925	ENSG00000148655	C10orf11	brain_caudate_basal_ganglia	protein_coding	32	0.260074	2.9848e-08	-0.385	0.0061
10	103544200	103578696	ENSG00000198408	MGEA5	brain_cerebellar_hemisphere	protein_coding	63	0.000213316	0.270882	1.31	0.0061
10	78629359	79398353	ENSG00000156113	KCNMA1	muscle_skeletal	protein_coding	32	0.0492191	0.000318179	0.638	0.00609
3	170128300	170136403	ENSG00000242578	RP11-469J4.3	artery_tibial	lincRNA	50	0.0469791	0.00182548	1.05	0.00609
1	243287730	243418650	ENSG00000143702	CEP170	adipose_visceral_omentum	protein_coding	36	0.0250817	0.00576821	4.9	0.00605
16	71660064	71676017	ENSG00000140832	MARVELD3	skin_not_sun_exposed_suprapubic	protein_coding	59	0.238809	3.55696e-20	-1.89	0.00605
5	111478138	111755013	ENSG00000129595	EPB41L4A	skin_not_sun_exposed_suprapubic	protein_coding	20	0.311165	3.00663e-22	-3.78	0.00605
1	233086351	233119628	ENSG00000135778	NTPCR	pancreas	protein_coding	15	0.388138	2.42606e-19	0.403	0.00603
10	78629359	79398353	ENSG00000156113	KCNMA1	adipose	protein_coding	32	0.263713	2.34481e-39	0.62	0.00603
6	42847356	42857663	ENSG00000146223	RPL7L1	liver	protein_coding	32	0.0687306	0.0336933	2.87	0.00603
1	233463514	233520894	ENSG00000143674	MLK4	brain_anterior_cingulate_cortex_ba24	protein_coding	15	0.177883	0.0538635	0.928	0.00601
16	71671738	71758604	ENSG00000040199	PHLPP2	stomach	protein_coding	59	0.0917448	7.43799e-06	-1.84	0.00601
16	79709503	79709503	ENSG00000261390.1	RP11-345M22.2	spleen	lincRNA	19	0.202889	4.63097e-06	-4.08	0.00601
5	110831731	110848288	ENSG00000164211	STARD4	thyroid	protein_coding	20	0.0826748	0.000133831	-1.89	0.00599
10	78629359	79398353	ENSG00000156113	KCNMA1	lung	protein_coding	32	0.179559	4.6464e-12	-0.189	0.00597
19	22235254	22274282	ENSG00000197134	ZNF257	adipose_visceral_omentum	protein_coding	77	0.273992	4.02904e-16	4.14	0.00597
1	243419320	243663394	ENSG00000054282	SDCCAG8	lung	protein_coding	36	0.102718	3.77112e-07	5.17	0.00596
16	80574631	80584657	ENSG00000168589	DYNLRB2	liver	protein_coding	19	0.0756365	0.0473836	-3.03	0.00596
1	243192814	243215554	ENSG00000231512	RP11-261C10.2	testis	lincRNA	36	0.242359	4.39814e-12	-3.86	0.00595
10	77360998	78319925	ENSG00000148655	C10orf11	skin_sun_exposed_lower_leg	protein_coding	32	0.0758507	3.1035e-07	-0.682	0.00595
10	79550549	79686378	ENSG00000151208	DLG5	testis	protein_coding	32	0.0887976	0.00111422	-0.335	0.00595
10	79793518	79816570	ENSG00000138326	RPS24	heart_left_ventricle	protein_coding	32	0.164305	9.55644e-08	0.62	0.00595
10	105036920	105050108	ENSG00000148798	INA	testis	protein_coding	63	0.100493	0.000133044	1.48	0.00595
1	242246288	242687998	ENSG00000180287	PLD5	adrenal_gland	protein_coding	36	0.0860909	0.003766	0.385	0.00594
10	79550549	79686378	ENSG00000151208	DLG5	skin_sun_exposed_lower_leg	protein_coding	32	0.263804	5.88801e-25	-0.0778	0.00594
15	68499330	68549549	ENSG00000128973	CLN6	brain_cerebellum	protein_coding	30	0.0946776	0.00293829	-2.03	0.00593
16	71671738	71758604	ENSG00000040199	PHLPP2	blood	protein_coding	59	0.0499535	5.54392e-16	-1.96	0.00593
16	71660064	71676017	ENSG00000140832	MARVELD3	skin_sun_exposed_lower_leg	protein_coding	59	0.176219	1.50578e-15	-2.52	0.00592
15	68594050	68724501	ENSG00000137809	ITGA11	adipose	protein_coding	30	0.0196293	0.000506917	1.83	0.00591
16	71621637	71621637	ENSG00000268927.1	FLJ00418	brain_cerebellum	protein_coding	59	0.128364	3.32237e-05	-1.86	0.00591
9	19408925	19452018	ENSG00000177076	ACER2	skin_sun_exposed_lower_leg	protein_coding	30	0.01786	0.113577	-0.767	0.00591
1	233086351	233119628	ENSG00000135778	NTPCR	brain_cerebellum	protein_coding	15	0.470092	1.23253e-14	0.242	0.0059
10	79490524	79494527	ENSG00000213514	RP11-428P16.2	adipose_visceral_omentum	pseudogene	32	0.062541	0.00986382	-0.731	0.00589
10	103867317	103880210	ENSG00000198728	LDB1	whole_blood	protein_coding	63	0.0817383	9.46683e-05	1.4	0.00589
10	105156405	105206049	ENSG00000148843	PDCD11	colon_sigmoid	protein_coding	63	0.0549224	1.17025e-09	-1.47	0.00588
8	33228342	33330940	ENSG00000172728	FUT10	spleen	protein_coding	10	0.447129	3.3437e-12	2.15	0.00588
16	71671738	71758604	ENSG00000040199	PHLPP2	heart_atrial_appendage	protein_coding	59	0.170184	6.08943e-11	-1.69	0.00587
16	81115566	81130008	ENSG00000140905	GCSH	brain_cerebellum	protein_coding	19	0.103553	0.000681667	0.111	0.00587
19	21679484	21739072	ENSG00000197013	ZNF429	colon_sigmoid	protein_coding	77	0.0869887	5.25211e-05	-1.95	0.00587
5	112212084	112258236	ENSG00000129625	REEP5	artery_aorta	protein_coding	20	0.15417	9.82297e-09	0.849	0.00587
10	79793518	79816570	ENSG00000138326	RPS24	artery_tibial	protein_coding	32	0.00734276	0.0335992	0.507	0.00586
9	18717972	18718524	ENSG00000236857	RP11-503K16.2	adipose_subcutaneous	pseudogene	30	0.0324982	0.0012037	-1.09	0.00586
1	243419320	243663394	ENSG00000054282	SDCCAG8	adipose_subcutaneous	protein_coding	36	0.144763	1.19307e-13	5.58	0.00585
10	105156405	105206049	ENSG00000148843	PDCD11	brain_cerebellar_hemisphere	protein_coding	63	0.235143	0.000234686	-1.38	0.00585
12	66517697	66563765	ENSG00000155957	TMBIM4	cells_transformed_fibroblasts	protein_coding	31	0.386058	1.86602e-27	-1.05	0.00585
16	81115566	81130008	ENSG00000140905	GCSH	pancreas	protein_coding	19	0.0931314	0.0173744	0.318	0.00585
10	77360998	78319925	ENSG00000148655	C10orf11	artery_tibial	protein_coding	32	0.17329	2.13565e-11	-0.413	0.00584
16	78133310	79246564	ENSG00000186153	WWOX	brain_hippocampus	protein_coding	19	0.238929	4.6541e-05	1.51	0.00584
5	112312399	112356667	ENSG00000172795	DCP2	esophagus_muscularis	protein_coding	20	0.188995	7.5848e-16	-0.314	0.00584
16	71671738	71758604	ENSG00000040199	PHLPP2	heart_left_ventricle	protein_coding	59	0.131812	4.55502e-08	-1.74	0.00582
9	21329670	21335379	ENSG00000198642	KLHL9	brain_hippocampus	protein_coding	30	0.114468	0.0727129	-0.982	0.00582
18	904944	912173	ENSG00000141433	ADCYAP1	brain_hypothalamus	protein_coding	35	0.0920531	0.142709	1.74	0.00581
1	243430559	243431421	ENSG00000224727	FCF1P7	thyroid	pseudogene	36	0.011004	0.0336246	-5.21	0.0058
1	233086344	233114520	C1orf57	C1orf57	blood	NA	15	0.232643	1.08709e-73	0.557	0.00579
10	79793518	79816570	ENSG00000138326	RPS24	adipose_visceral_omentum	protein_coding	32	0.149871	0.000184962	0.353	0.00579
15	68570141	68588203	ENSG00000169018	FEM1B	colon_transverse	protein_coding	30	0.053077	0.00885805	-1.36	0.00578
1	231472850	231490769	ENSG00000010072	SPRTN	lung	protein_coding	15	0.0136973	0.0405474	-0.772	0.00576
1	231762561	232177018	ENSG00000162946	DISC1	heart_atrial_appendage	protein_coding	15	0.0498414	0.00786782	-0.675	0.00576
16	79710005	79841819	ENSG00000260876	RP11-345M22.1	prostate	lincRNA	19	0.0776367	0.0322344	-0.383	0.00576
1	233749750	233808258	ENSG00000135750	KCNK1	prostate	protein_coding	15	0.0585369	0.0145037	0.881	0.00575
10	104005289	104142656	ENSG00000107862	GBF1	prostate	protein_coding	63	-0.000836025	0.200498	-1.21	0.00575
16	70514471	70557468	ENSG00000103051	COG4	nerve_tibial	protein_coding	59	0.0809287	2.8043e-07	-1.45	0.00575
16	71671738	71758604	ENSG00000040199	PHLPP2	breast_mammary_tissue	protein_coding	59	0.0511546	0.000557994	-1.72	0.00574
5	110831731	110848288	ENSG00000164211	STARD4	spleen	protein_coding	20	0.12984	0.045886	-0.791	0.00573
19	8478154	8503901	ENSG00000099785	2025-03-02	liver	protein_coding	69	0.139172	0.00648049	1.62	0.00572
5	112357796	112824527	ENSG00000171444	MCC	testis	protein_coding	20	0.287176	6.60286e-16	-1.72	0.00572
1	231359509	231376933	ENSG00000143633	C1orf131	breast_mammary_tissue	protein_coding	15	0.0140697	0.0616175	0.49	0.00571
10	77360998	78319925	ENSG00000148655	C10orf11	breast_mammary_tissue	protein_coding	32	0.123914	1.95929e-09	0.508	0.00571
16	78133310	79246564	ENSG00000186153	WWOX	brain_caudate_basal_ganglia	protein_coding	19	0.0782734	0.00669895	-0.487	0.00571
1	233119181	233431459	ENSG00000135749	PCNXL2	nerve_tibial	protein_coding	15	0.104195	0.000102014	0.213	0.0057
1	243419320	243663394	ENSG00000054282	SDCCAG8	brain_spinal_cord_cervical_c-1	protein_coding	36	0.0700937	0.294515	3.35	0.00569
1	243218163	243219696	ENSG00000253326	RP11-261C10.7	skin_not_sun_exposed_suprapubic	pseudogene	36	0.100169	3.43144e-06	-1.26	0.00569
10	77360998	78319925	ENSG00000148655	C10orf11	brain_hippocampus	protein_coding	32	0.0679334	3.43318e-05	-0.426	0.00569
10	79793518	79816570	ENSG00000138326	RPS24	nerve_tibial	protein_coding	32	0.0561499	4.43673e-05	0.203	0.00569
10	104221149	104236802	ENSG00000138111	TMEM180	brain_anterior_cingulate_cortex_ba24	protein_coding	63	0.0596394	0.0486174	1.25	0.00569
16	71660064	71676017	ENSG00000140832	MARVELD3	esophagus_mucosa	protein_coding	59	0.179466	4.0516e-16	-1.66	0.00569
19	22235265	22273903	ENSG00000197134	ZNF257	brain_dorsolateral_prefrontal_cortex	protein_coding	77	0.536875	1.88014e-77	3.43	0.00569
10	79550549	79686378	ENSG00000151208	DLG5	brain_hippocampus	protein_coding	32	0.079351	0.0576525	0.529	0.00565
10	79550549	79686378	ENSG00000151208	DLG5	heart_left_ventricle	protein_coding	32	0.317711	2.34441e-21	-0.366	0.00564
16	72146056	72210777	ENSG00000118557	PMFBP1	heart_atrial_appendage	protein_coding	59	0.00888472	0.0282296	0.695	0.00564
8	33218361	33218933	ENSG00000272338	RP11-722E23.2	adipose_subcutaneous	lincRNA	10	0.0433681	0.0143276	-2.46	0.00564
1	243419306	243663393	ENSG00000054282	SDCCAG8	brain_dorsolateral_prefrontal_cortex	protein_coding	36	0.107235	5.58995e-13	-5.75	0.00563
5	112196919	112205485	ENSG00000153037	SRP19	adipose_subcutaneous	protein_coding	20	0.0476808	2.02388e-05	0.835	0.00562
1	243419320	243663394	ENSG00000054282	SDCCAG8	stomach	protein_coding	36	0.0267841	0.000157278	5.77	0.00561
3	170128300	170136403	ENSG00000242578	RP11-469J4.3	nerve_tibial	lincRNA	50	0.0519625	0.00425372	-1.71	0.00561
19	6729925	6737614	ENSG00000125734	GPR108	whole_blood	protein_coding	69	0.107756	1.81943e-09	0.806	0.00559
1	242158792	242162375	ENSG00000197769	MAP1LC3C	adipose_subcutaneous	protein_coding	36	0.0385298	0.00480351	-0.947	0.00558
1	241587592	241596792	ENSG00000225554	RP11-527D7.1	brain_spinal_cord_cervical_c-1	lincRNA	36	0.418075	6.17515e-06	-0.645	0.00557
1	231499497	231560790	ENSG00000135766	EGLN1	brain_nucleus_accumbens_basal_ganglia	protein_coding	15	-0.00309844	0.206869	-0.61	0.00556
10	79550549	79686378	ENSG00000151208	DLG5	artery_coronary	protein_coding	32	0.385723	3.60884e-13	0.53	0.00556
10	104629273	104661656	ENSG00000214435	AS3MT	brain_frontal_cortex_ba9	protein_coding	63	-0.0802914	0.0021278	-0.884	0.00556
15	66679210	66783882	ENSG00000169032	MAP2K1	brain_dorsolateral_prefrontal_cortex	protein_coding	30	0.0465951	2.16129e-06	-1.94	0.00556
10	79490524	79494527	ENSG00000213514	RP11-428P16.2	thyroid	pseudogene	32	0.19765	8.91655e-19	-0.328	0.00555
16	78133310	79246564	ENSG00000186153	WWOX	whole_blood	protein_coding	19	0.0675269	0.00368934	-1.23	0.00555
15	68560130	68570332	ENSG00000260657	RP11-315D16.4	brain_anterior_cingulate_cortex_ba24	lincRNA	30	0.180883	1.59187e-08	1.39	0.00554
16	78133310	79246564	ENSG00000186153	WWOX	brain_cortex	protein_coding	19	0.135779	0.0324533	-0.825	0.00554
1	231157357	231157929	ENSG00000227934	RP11-423F24.3	minor_salivary_gland	pseudogene	15	-0.32019	0.233266	-0.623	0.00553
1	232940643	232946092	ENSG00000212916	MAP10	colon_transverse	protein_coding	15	0.0357759	0.00275289	-0.475	0.00552
1	243287730	243418650	ENSG00000143702	CEP170	adipose_subcutaneous	protein_coding	36	0.0546666	2.59325e-06	4.54	0.00551
10	78629359	79398353	ENSG00000156113	KCNMA1	adipose_visceral_omentum	protein_coding	32	0.112858	8.71455e-09	-0.043	0.00551
1	231154704	231175992	ENSG00000182118	FAM89A	adipose_subcutaneous	protein_coding	15	0.0907075	6.56714e-08	-0.623	0.0055
10	79550549	79686378	ENSG00000151208	DLG5	adrenal_gland	protein_coding	32	0.303084	1.56687e-11	0.329	0.0055
3	169511216	169530774	ENSG00000171757	LRRC34	skin_sun_exposed_lower_leg	protein_coding	50	0.0167608	0.0296521	4.93	0.0055
9	20341663	20622542	ENSG00000171843	MLLT3	brain_cortex	protein_coding	30	0.0860176	0.0518845	1.14	0.0055
10	77360998	78319925	ENSG00000148655	C10orf11	cells_transformed_fibroblasts	protein_coding	32	0.214811	1.96458e-15	-0.471	0.00549
10	79540095	79541634	ENSG00000213513	RP13-39P12.2	artery_tibial	pseudogene	32	0.0253003	0.000824475	-0.0714	0.00549
12	66517697	66563765	ENSG00000155957	TMBIM4	whole_blood	protein_coding	31	0.116223	4.42635e-11	-0.745	0.00549
16	80382362	80382362	ENSG00000260896.1	RP11-314O13.1	testis	lincRNA	19	0.0269095	0.0160885	0.67	0.00549
19	7541755	7554286	ENSG00000104883	PEX11G	brain_dorsolateral_prefrontal_cortex	protein_coding	69	0.0378954	1.82571e-05	1.93	0.00549
10	79540095	79541634	ENSG00000213513	RP13-39P12.2	whole_blood	pseudogene	32	0.0298046	0.00294166	0.526	0.00548
18	596988	650334	ENSG00000079101	CLUL1	brain_frontal_cortex_ba9	protein_coding	35	0.283948	1.68646e-06	-2.93	0.00548
9	19108373	19149288	ENSG00000147872	PLIN2	brain_anterior_cingulate_cortex_ba24	protein_coding	30	0.0493217	0.195665	-0.569	0.00548
10	79550549	79686378	ENSG00000151208	DLG5	pituitary	protein_coding	32	0.375626	7.08273e-17	-0.342	0.00547
12	66517697	66563765	ENSG00000155957	TMBIM4	lung	protein_coding	31	0.251729	6.28096e-22	-1.19	0.00547
19	7895119	7929862	ENSG00000142459	EVI5L	esophagus_mucosa	protein_coding	69	0.0447678	0.340108	1.92	0.00547
1	233086351	233119628	ENSG00000135778	NTPCR	artery_coronary	protein_coding	15	0.134679	0.000341149	0.664	0.00546
18	109065	122219	ENSG00000263006	ROCK1P1	artery_coronary	pseudogene	35	0.45827	1.2023e-16	-1.96	0.00546
9	20658308	20995954	ENSG00000188352	FOCAD	small_intestine_terminal_ileum	protein_coding	30	0.0778723	0.0071152	0.927	0.00546
1	231472850	231490769	ENSG00000010072	SPRTN	artery_tibial	protein_coding	15	0.0116147	0.0138629	-0.598	0.00545
19	22469210	22499978	ENSG00000196350	ZNF729	testis	protein_coding	77	0.120793	0.00480379	-5.13	0.00545
9	20995306	21031635	ENSG00000188921	PTPLAD2	muscle_skeletal	protein_coding	30	0.00814148	0.102243	-1.64	0.00544
9	19408925	19452018	ENSG00000177076	ACER2	skin_not_sun_exposed_suprapubic	protein_coding	30	0.0520582	4.10251e-05	-1.25	0.00544
10	77360998	78319925	ENSG00000148655	C10orf11	heart_left_ventricle	protein_coding	32	0.0887304	7.68515e-06	0.245	0.00543
10	77360998	78319925	ENSG00000148655	C10orf11	brain_hypothalamus	protein_coding	32	0.114075	0.0057032	0.544	0.00542
1	231472850	231490769	ENSG00000010072	SPRTN	pituitary	protein_coding	15	0.0763198	0.00160474	0.709	0.00541
12	66517697	66563765	ENSG00000155957	TMBIM4	esophagus_mucosa	protein_coding	31	0.182967	4.27485e-16	-0.606	0.0054
1	233086351	233119628	ENSG00000135778	NTPCR	prostate	protein_coding	15	0.0685834	0.0306991	0.446	0.00539
10	105148798	105156223	ENSG00000173915	USMG5	artery_tibial	protein_coding	63	0.0154531	0.0299149	-1.42	0.00539
12	66696325	66737423	ENSG00000127311	HELB	artery_coronary	protein_coding	31	0.0575618	0.00975686	-1.54	0.00539
16	72042487	72058954	ENSG00000102967	DHODH	adrenal_gland	protein_coding	59	0.116082	2.17351e-05	2.53	0.00539
10	79626633	79629368	ENSG00000204049	AL391421.1	skin_not_sun_exposed_suprapubic	protein_coding	32	0.0573301	0.0598005	0.459	0.00538
1	233119181	233431459	ENSG00000135749	PCNXL2	artery_aorta	protein_coding	15	0.0820959	2.17867e-05	0.587	0.00537
10	79550549	79686378	ENSG00000151208	DLG5	cells_transformed_fibroblasts	protein_coding	32	0.249446	1.62721e-17	0.425	0.00537
16	79619740	79634611	ENSG00000178573	MAF	stomach	protein_coding	19	0.0535072	0.00183715	0.552	0.00537
16	78133310	79246564	ENSG00000186153	WWOX	pancreas	protein_coding	19	0.131557	1.09872e-08	-1.02	0.00537
5	112212084	112258236	ENSG00000129625	REEP5	prostate	protein_coding	20	0.107816	0.040306	0.307	0.00537
1	233749750	233808258	ENSG00000135750	KCNK1	nerve_tibial	protein_coding	15	0.0385299	4.2662e-05	0.73	0.00536
10	104629273	104661656	ENSG00000214435	AS3MT	brain_anterior_cingulate_cortex_ba24	protein_coding	63	0.24983	9.99114e-09	-0.769	0.00536
10	104221149	104236802	ENSG00000138111	TMEM180	skin_not_sun_exposed_suprapubic	protein_coding	63	0.0377473	0.00382748	1.39	0.00536
15	67695957	67814182	ENSG00000259673	IQCH-AS1	colon_transverse	lincRNA	30	0.0827617	0.00207194	1.68	0.00536
16	78133310	79246564	ENSG00000186153	WWOX	brain_putamen_basal_ganglia	protein_coding	19	0.331761	1.40096e-07	0.924	0.00536
5	1.11933e+08	1.11933e+08	ENSG00000212643.1	ZRSR1	brain_substantia_nigra	protein_coding	20	0.00971431	0.239152	1.89	0.00536
9	21440440	21441315	ENSG00000197919	IFNA1	lung	protein_coding	30	0.0328237	7.14409e-05	0.912	0.00535
1	233749750	233808258	ENSG00000135750	KCNK1	thyroid	protein_coding	15	0.125629	9.93346e-09	0.639	0.00534
1	243419320	243663394	ENSG00000054282	SDCCAG8	esophagus_mucosa	protein_coding	36	0.102257	1.38634e-07	4.59	0.00534
1	233086351	233119628	ENSG00000135778	NTPCR	small_intestine_terminal_ileum	protein_coding	15	0.172148	2.45202e-05	0.335	0.00533
10	79793518	79816570	ENSG00000138326	RPS24	esophagus_gastroesophageal_junction	protein_coding	32	0.0942334	0.00259941	-0.289	0.00533
10	79490524	79494527	ENSG00000213514	RP11-428P16.2	skin_not_sun_exposed_suprapubic	pseudogene	32	0.0625024	1.48565e-05	0.201	0.00533
10	104674342	104675161	ENSG00000272912	RP11-724N1.1	adipose_visceral_omentum	lincRNA	63	0.00865035	0.250881	1.39	0.00532
16	79710005	79841819	ENSG00000260876	RP11-345M22.1	adrenal_gland	lincRNA	19	0.0668086	0.000279861	1.01	0.00532
3	169484709	169487683	ENSG00000184378	ACTRT3	brain_putamen_basal_ganglia	protein_coding	50	0.0542551	0.253411	-1.6	0.00532
1	231499497	231560790	ENSG00000135766	EGLN1	brain_hippocampus	protein_coding	15	0.0414608	0.0298204	0.331	0.00531
10	77360998	78319925	ENSG00000148655	C10orf11	ovary	protein_coding	32	0.100433	4.17467e-05	-0.0686	0.00531
16	71481500	71496998	ENSG00000167377	ZNF23	brain_substantia_nigra	protein_coding	59	0.0433733	0.000147682	-1.56	0.00531
16	78133310	79246564	ENSG00000186153	WWOX	esophagus_gastroesophageal_junction	protein_coding	19	0.0681118	0.00177402	0.702	0.00531
5	1.11522e+08	1.11522e+08	ENSG00000268358.1	EPB41L4A-AS2	breast_mammary_tissue	protein_coding	20	0.0463933	0.0151477	-2.81	0.00531
9	17579080	17797127	ENSG00000107295	SH3GL2	stomach	protein_coding	30	0.177124	1.83506e-10	-0.88	0.00531
1	233086351	233119628	ENSG00000135778	NTPCR	uterus	protein_coding	15	0.2699	0.00331543	0.621	0.0053
19	6729925	6737614	ENSG00000125734	GPR108	pituitary	protein_coding	69	0.109206	0.00111	-0.652	0.0053
1	241587592	241596792	ENSG00000225554	RP11-527D7.1	brain_cerebellar_hemisphere	lincRNA	36	0.107545	0.00614999	-0.246	0.00529
5	112357796	112824527	ENSG00000171444	MCC	nerve_tibial	protein_coding	20	0.177578	8.35845e-15	-2.4	0.00528
10	104221149	104236802	ENSG00000138111	TMEM180	brain_caudate_basal_ganglia	protein_coding	63	0.266897	5.36627e-08	-0.326	0.00527
5	112196919	112205485	ENSG00000153037	SRP19	testis	protein_coding	20	0.50597	2.9272e-29	-1.08	0.00527
1	241792155	241799232	ENSG00000203668	CHML	skin_sun_exposed_lower_leg	protein_coding	36	0.0618098	9.53455e-05	-0.259	0.00526
10	77360998	78319925	ENSG00000148655	C10orf11	prostate	protein_coding	32	0.0568891	0.00256619	-0.156	0.00526
10	104221149	104236802	ENSG00000138111	TMEM180	brain_cerebellar_hemisphere	protein_coding	63	0.409123	8.25916e-14	1.4	0.00526
10	105062553	105110891	ENSG00000156374	PCGF6	cells_transformed_fibroblasts	protein_coding	63	0.0297783	0.0568967	1.4	0.00526
1	233086351	233119628	ENSG00000135778	NTPCR	esophagus_muscularis	protein_coding	15	0.263422	1.59002e-17	0.586	0.00525
16	81069452	81080963	ENSG00000166454	ATMIN	vagina	protein_coding	19	0.083683	0.0327226	1.33	0.00524
19	21666176	21686040	ENSG00000268658	LINC00664	muscle_skeletal	lincRNA	77	0.200587	5.37478e-22	1.26	0.00524
12	65563351	65642107	ENSG00000174106	LEMD3	nerve_tibial	protein_coding	31	0.160659	2.66971e-13	0.118	0.00523
12	65277553	65371302	FLJ41278	FLJ41278	brain_dorsolateral_prefrontal_cortex	NA	31	0.378259	1.34633e-48	-1.62	0.00523
16	81115566	81130008	ENSG00000140905	GCSH	artery_tibial	protein_coding	19	0.0109222	0.0115317	-1.06	0.00523
10	77360998	78319925	ENSG00000148655	C10orf11	thyroid	protein_coding	32	0.261094	3.88718e-18	0.384	0.00522
10	79550549	79686378	ENSG00000151208	DLG5	adipose_subcutaneous	protein_coding	32	0.502995	7.62655e-52	-0.36	0.00522
16	80631803	80838226	ENSG00000166446	CDYL2	pancreas	protein_coding	19	0.281702	3.74027e-14	0.234	0.00522
1	232940643	232946092	ENSG00000212916	MAP10	cells_ebv-transformed_lymphocytes	protein_coding	15	0.0793536	0.126766	-0.625	0.00521
19	6426048	6433790	ENSG00000181240	SLC25A41	adipose_subcutaneous	protein_coding	69	0.366808	4.61925e-31	1.16	0.00521
5	112849380	112930982	ENSG00000047188	YTHDC2	artery_aorta	protein_coding	20	0.137244	2.21593e-05	0.571	0.0052
10	104404253	104418164	ENSG00000171206	TRIM8	esophagus_gastroesophageal_junction	protein_coding	63	0.0308229	0.0873328	-1.32	0.00519
3	170075466	170114623	ENSG00000136603	SKIL	brain_putamen_basal_ganglia	protein_coding	50	0.0554328	0.243693	-1.14	0.00518
1	244515937	244552965	ENSG00000173728	C1orf100	adipose_subcutaneous	protein_coding	36	0.0244449	0.0993839	-1.18	0.00517
10	77360998	78319925	ENSG00000148655	C10orf11	pancreas	protein_coding	32	0.164301	1.02311e-05	-0.149	0.00516
10	77360998	78319925	ENSG00000148655	C10orf11	adipose_subcutaneous	protein_coding	32	0.22509	6.15783e-17	-0.136	0.00515
10	105206543	105212660	ENSG00000138172	CALHM2	adipose_subcutaneous	protein_coding	63	0.0783073	3.29425e-06	1.28	0.00515
16	71879899	71962913	ENSG00000182149	IST1	brain_cerebellar_hemisphere	protein_coding	59	0.0825583	0.0133537	-0.176	0.00515
19	21902603	21902837	ENSG00000268117	VN1R84P	adipose_visceral_omentum	pseudogene	77	0.278805	6.3233e-16	-1.08	0.00515
16	71315292	71323618	ENSG00000180917	CMTR2	artery_tibial	protein_coding	59	0.116625	6.36049e-09	1.85	0.00514
10	105206542	105212162	ENSG00000138172	CALHM2	brain_dorsolateral_prefrontal_cortex	protein_coding	63	0.00860084	0.0271603	-1.3	0.00513
16	80631803	80838226	ENSG00000166446	CDYL2	adipose_subcutaneous	protein_coding	19	0.112089	1.24245e-09	0.513	0.00513
10	79550549	79686378	ENSG00000151208	DLG5	ovary	protein_coding	32	0.365221	7.88652e-08	-0.129	0.00512
10	105156405	105206049	ENSG00000148843	PDCD11	brain_cerebellum	protein_coding	63	0.21342	7.13281e-15	-1.24	0.00511
16	81040103	81066719	ENSG00000166451	CENPN	lung	protein_coding	19	0.0521911	0.000102202	-0.672	0.00511
5	1456595	1524092	ENSG00000153395	LPCAT1	brain_cerebellar_hemisphere	protein_coding	36	0.0761469	0.17317	-2.2	0.00511
1	231376953	231413719	ENSG00000116906	GNPAT	muscle_skeletal	protein_coding	15	0.0862117	4.02123e-10	-0.472	0.0051
1	231114727	231136341	ENSG00000173409	ARV1	brain_cortex	protein_coding	15	0.170234	0.000158192	-0.472	0.0051
10	77360998	78319925	ENSG00000148655	C10orf11	muscle_skeletal	protein_coding	32	0.103657	2.68609e-12	-0.296	0.0051
10	79793518	79816570	ENSG00000138326	RPS24	uterus	protein_coding	32	0.109965	0.0629257	0.295	0.0051
10	77360998	78319925	ENSG00000148655	C10orf11	lung	protein_coding	32	0.273863	5.99401e-22	0.0759	0.00509
10	79793518	79816570	ENSG00000138326	RPS24	heart_atrial_appendage	protein_coding	32	0.107569	2.82509e-07	-0.0621	0.00509
10	79550549	79686378	ENSG00000151208	DLG5	whole_blood	protein_coding	32	0.198209	3.17868e-17	-0.196	0.00509
5	112201189	112201189	ENSG00000212643.1	ZRSR1	skin_sun_exposed_lower_leg	protein_coding	20	0.156873	1.30075e-15	0.692	0.00509
5	112357796	112824527	ENSG00000171444	MCC	brain_cerebellar_hemisphere	protein_coding	20	0.00627456	0.189114	0.692	0.00509
5	427324	427324	ENSG00000221990.2	C5orf55	artery_aorta	protein_coding	36	0.163546	1.34028e-09	3.6	0.00507
10	78629359	79398353	ENSG00000156113	KCNMA1	nerve_tibial	protein_coding	32	0.130986	3.31369e-10	-0.227	0.00506
10	79490524	79494527	ENSG00000213514	RP11-428P16.2	esophagus_mucosa	pseudogene	32	0.0443929	3.88351e-06	-0.197	0.00505
10	77360998	78319925	ENSG00000148655	C10orf11	adipose_visceral_omentum	protein_coding	32	0.292087	1.86918e-20	0.0597	0.00505
19	22235254	22274282	ENSG00000197134	ZNF257	pituitary	protein_coding	77	0.101144	0.000307324	2.83	0.00504
9	19230433	19374139	ENSG00000137145	DENND4C	esophagus_mucosa	protein_coding	30	0.103811	1.03039e-05	-1.11	0.00504
10	77542518	78317130	C10orf11	C10orf11	blood	NA	32	0.00707658	0.00173	0.18	0.00503
3	170779128	171178197	ENSG00000154310	TNIK	adipose	protein_coding	50	0.0249768	9.92852e-05	1.35	0.00503
1	231762561	232177018	ENSG00000162946	DISC1	skin_not_sun_exposed_suprapubic	protein_coding	15	0.0244992	0.0570027	-0.268	0.00502
10	79540095	79541634	ENSG00000213513	RP13-39P12.2	colon_transverse	pseudogene	32	0.134884	6.46944e-06	0.109	0.00502
15	68560130	68570332	ENSG00000260657	RP11-315D16.4	artery_tibial	lincRNA	30	0.226068	5.56387e-18	1.23	0.00502
16	70380732	70407286	ENSG00000168872	DDX19A	brain_caudate_basal_ganglia	protein_coding	59	0.0742582	0.128675	-1.93	0.00502
19	22357568	22357993	ENSG00000269345	VN1R85P	brain_caudate_basal_ganglia	pseudogene	77	0.00625129	0.0427538	5.74	0.00501
10	79550549	79686378	ENSG00000151208	DLG5	lung	protein_coding	32	0.47137	6.50059e-47	0.0181	0.005
10	104404253	104418164	ENSG00000171206	TRIM8	whole_blood	protein_coding	63	0.00796688	0.0839227	0.815	0.005
10	104404253	104418164	ENSG00000171206	TRIM8	lung	protein_coding	63	0.056159	0.00671432	0.815	0.005
10	104221149	104236802	ENSG00000138111	TMEM180	brain_cerebellum	protein_coding	63	0.349233	5.02098e-16	-0.815	0.005
5	112357796	112824527	ENSG00000171444	MCC	esophagus_mucosa	protein_coding	20	0.167443	4.45715e-10	-1.6	0.005
1	231154704	231175992	ENSG00000182118	FAM89A	skin_not_sun_exposed_suprapubic	protein_coding	15	0.072849	1.14466e-05	-0.513	0.00499
9	18927656	19033251	ENSG00000155875	FAM154A	testis	protein_coding	30	0.115207	8.59627e-10	1.59	0.00499
10	79793518	79816570	ENSG00000138326	RPS24	cells_ebv-transformed_lymphocytes	protein_coding	32	0.0105458	0.100953	0.0774	0.00498
16	79619740	79634611	ENSG00000178573	MAF	lung	protein_coding	19	0.0133575	0.0422393	-2.74	0.00498
5	112357796	112824527	ENSG00000171444	MCC	colon_sigmoid	protein_coding	20	0.0752332	0.000991483	0.915	0.00498
10	104221149	104236802	ENSG00000138111	TMEM180	pancreas	protein_coding	63	0.25815	9.99577e-11	1.28	0.00497
5	112357796	112824527	ENSG00000171444	MCC	adrenal_gland	protein_coding	20	0.0390234	0.000450707	0.622	0.00497
1	233463514	233520894	ENSG00000143674	MLK4	brain_hypothalamus	protein_coding	15	0.0989806	0.00389615	0.0181	0.00496
1	234040679	234460262	ENSG00000183780	SLC35F3	vagina	protein_coding	15	0.0678589	0.0826144	0.603	0.00496
1	231376953	231413719	ENSG00000116906	GNPAT	lung	protein_coding	15	0.189174	1.78502e-14	0.421	0.00496
10	79734907	79789303	ENSG00000148606	POLR3A	heart_atrial_appendage	protein_coding	32	0.0263425	0.00529215	0.0353	0.00495
16	71660064	71676017	ENSG00000140832	MARVELD3	thyroid	protein_coding	59	0.0696188	9.03408e-06	-0.199	0.00494
1	242251688	242687998	ENSG00000180287	PLD5	brain_dorsolateral_prefrontal_cortex	protein_coding	36	0.0360687	2.8575e-05	0.383	0.00493
9	19375713	19380252	ENSG00000137154	RPS6	artery_tibial	protein_coding	30	0.0595912	0.000416966	1.35	0.00493
1	232533711	232697304	ENSG00000116991	SIPA1L2	liver	protein_coding	15	0.12824	0.0015368	-0.401	0.00492
15	40824082	40824749	MRPL42P5	MRPL42P5	brain_dorsolateral_prefrontal_cortex	NA	47	0.254	1.04181e-30	1.73	0.00492
16	71879894	71891231	ENSG00000224470	ATXN1L	blood	protein_coding	59	0.0186643	6.53406e-07	-1.65	0.00492
5	218356	256815	ENSG00000073578	SDHA	cells_ebv-transformed_lymphocytes	protein_coding	36	0.00687066	0.146019	1.97	0.00492
6	44777054	45345690	ENSG00000196284	SUPT3H	minor_salivary_gland	protein_coding	32	0.190223	0.00957748	2.16	0.00492
1	232940643	232946092	ENSG00000212916	MAP10	stomach	protein_coding	15	0.0305362	0.0250186	0.423	0.00491
1	231762561	232177018	ENSG00000162946	DISC1	artery_aorta	protein_coding	15	0.0364987	0.0244657	-0.313	0.00491
19	22235254	22274282	ENSG00000197134	ZNF257	adipose	protein_coding	77	0.0623226	1.18016e-09	4.72	0.00491
8	33228342	33330940	ENSG00000172728	FUT10	brain_nucleus_accumbens_basal_ganglia	protein_coding	10	0.0369421	0.299972	-6.58	0.00491
1	231762561	232177018	ENSG00000162946	DISC1	esophagus_muscularis	protein_coding	15	0.0780612	1.58026e-05	0.471	0.0049
10	79793518	79816570	ENSG00000138326	RPS24	cells_transformed_fibroblasts	protein_coding	32	0.1041	1.74935e-07	-0.0453	0.0049
10	105148798	105156223	ENSG00000173915	USMG5	adipose_subcutaneous	protein_coding	63	0.0257106	0.000833543	-1.32	0.0049
10	104674342	104675161	ENSG00000272912	RP11-724N1.1	brain_hypothalamus	lincRNA	63	-0.0102929	0.101085	0.943	0.0049
1	234040679	234460262	ENSG00000183780	SLC35F3	esophagus_mucosa	protein_coding	15	0.266919	1.39338e-21	-0.184	0.00489
18	1.04524e+06	1.04524e+06	ENSG00000264433.1	RP11-720L2.3	heart_atrial_appendage	lincRNA	35	0.0558185	4.59487e-05	-2.57	0.00489
19	7009252	7009252	ENSG00000269761.1	RP11-1137G4.4	testis	pseudogene	69	0.131031	0.000110316	-1.26	0.00489
1	231376953	231413719	ENSG00000116906	GNPAT	brain_cerebellum	protein_coding	15	0.267928	1.9247e-08	-0.521	0.00488
1	233086351	233119628	ENSG00000135778	NTPCR	vagina	protein_coding	15	-0.0457683	0.365162	0.404	0.00488
10	105156405	105206049	ENSG00000148843	PDCD11	nerve_tibial	protein_coding	63	0.150674	8.47593e-12	-1.32	0.00488
16	81040103	81066719	ENSG00000166451	CENPN	pituitary	protein_coding	19	0.134719	0.000194414	-0.0287	0.00488
5	112357796	112824527	ENSG00000171444	MCC	colon_transverse	protein_coding	20	0.18614	3.68459e-07	0.13	0.00488
1	232940643	232946092	ENSG00000212916	MAP10	brain_cerebellum	protein_coding	15	0.127013	5.07093e-05	-0.238	0.00487
1	244515937	244552965	ENSG00000173728	C1orf100	testis	protein_coding	36	0.0182768	0.0236198	-0.53	0.00486
10	104221149	104236802	ENSG00000138111	TMEM180	brain_hippocampus	protein_coding	63	0.0280572	1.43217e-06	1.32	0.00486
5	111478138	111755013	ENSG00000129595	EPB41L4A	adipose_subcutaneous	protein_coding	20	0.213394	3.06528e-17	-3.46	0.00486
9	19053141	19103117	ENSG00000147874	HAUS6	esophagus_muscularis	protein_coding	30	0.0712902	1.48605e-05	-3.98	0.00486
19	22235254	22274282	ENSG00000197134	ZNF257	heart_atrial_appendage	protein_coding	77	0.195867	1.08311e-08	5.06	0.00485
19	22235254	22274282	ENSG00000197134	ZNF257	brain_caudate_basal_ganglia	protein_coding	77	0.116102	0.0360206	5.45	0.00485
5	112212084	112258236	ENSG00000129625	REEP5	artery_tibial	protein_coding	20	0.0620194	7.62097e-05	1.46	0.00485
16	79619740	79634611	ENSG00000178573	MAF	spleen	protein_coding	19	0.0297688	0.0383601	-0.682	0.00484
16	81040103	81066719	ENSG00000166451	CENPN	brain_frontal_cortex_ba9	protein_coding	19	0.0875334	0.153717	0.474	0.00483
19	5691845	5720583	ENSG00000196365	LONP1	heart_left_ventricle	protein_coding	69	0.0976695	0.000625196	1.3	0.00483
1	243218163	243219696	ENSG00000253326	RP11-261C10.7	brain_nucleus_accumbens_basal_ganglia	pseudogene	36	0.181545	0.00226115	-2.28	0.00482
10	105206543	105212660	ENSG00000138172	CALHM2	skin_sun_exposed_lower_leg	protein_coding	63	0.0832372	1.68767e-07	-1.31	0.00482
16	78133310	79246564	ENSG00000186153	WWOX	brain_spinal_cord_cervical_c-1	protein_coding	19	0.3518	8.89435e-05	0.685	0.00482
5	111478138	111755013	ENSG00000129595	EPB41L4A	thyroid	protein_coding	20	0.278429	2.10469e-25	-3.52	0.00482
1	231376953	231413719	ENSG00000116906	GNPAT	brain_hypothalamus	protein_coding	15	0.0807663	0.201085	0.396	0.00481
1	231762561	232177018	ENSG00000162946	DISC1	spleen	protein_coding	15	0.246626	6.07095e-06	0.522	0.00481
12	65335566	65335566	ENSG00000255693.1	RP11-766N7.3	brain_frontal_cortex_ba9	lincRNA	31	0.0350083	0.0652902	-1.21	0.00481
16	79246608	79263350	ENSG00000261722	RP11-679B19.2	skin_sun_exposed_lower_leg	lincRNA	19	0.0148226	0.0444488	-0.436	0.00481
3	169484709	169487683	ENSG00000184378	ACTRT3	small_intestine_terminal_ileum	protein_coding	50	0.0154961	0.121872	-1.03	0.00481
1	232940643	232946092	ENSG00000212916	MAP10	pancreas	protein_coding	15	0.0697742	0.040186	-0.333	0.0048
19	6664559	6670599	ENSG00000125735	TNFSF14	blood	protein_coding	69	0.00530312	0.00583506	-0.461	0.0048
3	170779128	171178197	ENSG00000154310	TNIK	artery_tibial	protein_coding	50	0.0695284	1.29723e-06	1.34	0.0048
5	112849380	112930982	ENSG00000047188	YTHDC2	brain_spinal_cord_cervical_c-1	protein_coding	20	0.0866231	0.0704323	-1.57	0.00479
1	231376953	231413719	ENSG00000116906	GNPAT	brain_spinal_cord_cervical_c-1	protein_coding	15	0.1255	0.0143431	0.37	0.00478
1	231664399	231702270	ENSG00000116918	TSNAX	heart_atrial_appendage	protein_coding	15	0.0217824	0.178449	-0.37	0.00478
1	232940643	232946092	ENSG00000212916	MAP10	lung	protein_coding	15	0.00552617	0.0041145	0.231	0.00478
1	233119181	233431459	ENSG00000135749	PCNXL2	brain_cerebellum	protein_coding	15	0.14216	0.0117778	0.323	0.00478
16	7.41117e+07	7.41117e+07	ENSG00000197445.2	C16orf47	ovary	protein_coding	59	0.0629804	0.00769216	-1.77	0.00478
16	81040103	81066719	ENSG00000166451	CENPN	brain_putamen_basal_ganglia	protein_coding	19	0.192392	0.059276	0.659	0.00478
1	233086351	233119628	ENSG00000135778	NTPCR	brain_amygdala	protein_coding	15	0.381156	1.26612e-05	-0.206	0.00477
10	104221149	104236802	ENSG00000138111	TMEM180	artery_tibial	protein_coding	63	0.125491	7.31087e-10	1.3	0.00477
12	66517697	66563765	ENSG00000155957	TMBIM4	nerve_tibial	protein_coding	31	0.0585488	7.48629e-05	-1.09	0.00477
19	22235254	22274282	ENSG00000197134	ZNF257	cells_transformed_fibroblasts	protein_coding	77	0.226941	3.30979e-12	5.19	0.00477
3	169490619	169507504	ENSG00000085274	MYNN	skin_not_sun_exposed_suprapubic	protein_coding	50	0.00419883	0.24965	-4.44	0.00477
1	243419320	243663394	ENSG00000054282	SDCCAG8	uterus	protein_coding	36	0.0850769	0.0400773	0.0854	0.00476
16	81115566	81130008	ENSG00000140905	GCSH	brain_amygdala	protein_coding	19	0.0085388	0.237306	0.592	0.00476
1	243419320	243663394	ENSG00000054282	SDCCAG8	pancreas	protein_coding	36	0.171812	1.23856e-06	5.37	0.00475
1	241753404	241840678	ENSG00000054277	OPN3	testis	protein_coding	36	0.243667	1.71487e-07	-1.22	0.00475
6	43005355	43021683	ENSG00000044090	CUL7	muscle_skeletal	protein_coding	32	0.0244399	0.0323331	2.42	0.00475
1	233119181	233431459	ENSG00000135749	PCNXL2	colon_transverse	protein_coding	15	0.0536385	0.0396427	-0.057	0.00474
19	6583194	6604114	ENSG00000125726	CD70	breast_mammary_tissue	protein_coding	69	0.00716445	0.0178205	2.63	0.00474
5	111074163	111074163	ENSG00000224032.2	EPB41L4A-AS1	ovary	lincRNA	20	0.00619695	0.0655636	1.69	0.00474
15	68560130	68570332	ENSG00000260657	RP11-315D16.4	nerve_tibial	lincRNA	30	0.157633	1.40887e-13	1.43	0.00473
15	66628544	66679084	ENSG00000075131	TIPIN	brain_frontal_cortex_ba9	protein_coding	30	0.24954	5.86254e-09	1.9	0.00472
10	105127724	105148822	ENSG00000148835	TAF5	esophagus_mucosa	protein_coding	63	0.0060092	0.059774	-1.28	0.00471
1	232940643	232946092	ENSG00000212916	MAP10	spleen	protein_coding	15	0.09329	0.0702303	0.213	0.0047
3	171318195	171528740	ENSG00000075651	PLD1	skin_sun_exposed_lower_leg	protein_coding	50	0.0346458	0.00350907	1.34	0.0047
1	231114727	231136341	ENSG00000173409	ARV1	skin_not_sun_exposed_suprapubic	protein_coding	15	0.0583574	0.143904	-0.354	0.00469
10	103911933	103923627	ENSG00000166197	NOLC1	heart_atrial_appendage	protein_coding	63	-0.00349734	0.139461	-1.17	0.00469
15	68560130	68570332	ENSG00000260657	RP11-315D16.4	thyroid	lincRNA	30	0.400935	4.91145e-36	1.34	0.00469
1	232940643	232946092	ENSG00000212916	MAP10	thyroid	protein_coding	15	0.0860793	3.48607e-05	0.187	0.00468
1	243419320	243663394	ENSG00000054282	SDCCAG8	skin_not_sun_exposed_suprapubic	protein_coding	36	0.0375464	0.100352	4.3	0.00468
1	243287730	243418650	ENSG00000143702	CEP170	nerve_tibial	protein_coding	36	0.0947854	4.96643e-06	4.79	0.00468
12	66741211	67197966	ENSG00000155974	GRIP1	skin_sun_exposed_lower_leg	protein_coding	31	0.0288071	0.0198902	-0.952	0.00468
19	8411401	8412571	ENSG00000268884	CTD-2550O8.7	brain_caudate_basal_ganglia	pseudogene	69	0.0734253	0.0493173	-2.07	0.00468
19	8373167	8386263	ENSG00000267855	NDUFA7	skin_sun_exposed_lower_leg	protein_coding	69	0.0245675	0.000600331	2.09	0.00468
5	112020302	112020302	ENSG00000212643.1	ZRSR1	nerve_tibial	protein_coding	20	0.0388022	0.00804618	-1.83	0.00468
16	78133310	79246564	ENSG00000186153	WWOX	esophagus_mucosa	protein_coding	19	0.259061	8.73349e-19	-1.1	0.00467
19	22357568	22357993	ENSG00000269345	VN1R85P	colon_transverse	pseudogene	77	0.0411924	0.184306	2.45	0.00467
1	233749750	233808258	ENSG00000135750	KCNK1	skin_not_sun_exposed_suprapubic	protein_coding	15	0.121949	2.81928e-06	-0.369	0.00466
1	242246288	242687998	ENSG00000180287	PLD5	artery_aorta	protein_coding	36	0.113351	8.23709e-08	1.28	0.00466
12	6.51814e+07	6.51814e+07	ENSG00000255693.1	RP11-766N7.3	brain_caudate_basal_ganglia	lincRNA	31	0.0702165	0.0234441	-0.707	0.00466
5	112043195	112181936	ENSG00000134982	APC	adipose	protein_coding	20	0.00831591	0.0172533	0.283	0.00466
1	241753404	241840678	ENSG00000054277	OPN3	brain_hypothalamus	protein_coding	36	0.0378378	0.0115607	0.452	0.00465
16	71315292	71323618	ENSG00000180917	CMTR2	artery_aorta	protein_coding	59	0.0112782	0.0592114	1.65	0.00465
16	72078188	72128330	ENSG00000140830	TXNL4B	pancreas	protein_coding	59	0.100793	0.000145461	3.2	0.00465
15	66628544	66679084	ENSG00000075131	TIPIN	brain_cortex	protein_coding	30	0.431675	2.83682e-12	1.26	0.00464
5	112196919	112205485	ENSG00000153037	SRP19	heart_left_ventricle	protein_coding	20	0.027671	0.017785	1.12	0.00464
5	112357796	112824527	ENSG00000171444	MCC	lung	protein_coding	20	0.124179	2.18171e-11	-0.169	0.00464
15	68560130	68570332	ENSG00000260657	RP11-315D16.4	brain_nucleus_accumbens_basal_ganglia	lincRNA	30	0.315894	2.67768e-11	1.2	0.00463
16	79246608	79263350	ENSG00000261722	RP11-679B19.2	nerve_tibial	lincRNA	19	0.0604365	0.0069955	-0.211	0.00463
9	19507450	19786926	ENSG00000155886	SLC24A2	colon_transverse	protein_coding	30	0.0326083	0.0069301	-1.07	0.00463
1	241695434	241758944	ENSG00000117009	KMO	nerve_tibial	protein_coding	36	0.200888	3.82732e-15	-0.748	0.00462
10	104221149	104236802	ENSG00000138111	TMEM180	esophagus_muscularis	protein_coding	63	0.349711	7.98757e-23	1.29	0.00462
3	169755717	169803191	ENSG00000173890	GPR160	adrenal_gland	protein_coding	50	0.0302225	0.0420419	-1.15	0.00462
1	243218163	243219696	ENSG00000253326	RP11-261C10.7	brain_spinal_cord_cervical_c-1	pseudogene	36	0.0527574	0.0598825	0.0447	0.00461
12	66516842	66524548	ENSG00000139233	LLPH	heart_atrial_appendage	protein_coding	31	0.0315656	0.136791	1.5	0.00461
16	78133310	79246564	ENSG00000186153	WWOX	nerve_tibial	protein_coding	19	0.170247	5.44821e-14	0.679	0.00461
10	104153867	104162281	ENSG00000077150	NFKB2	colon_transverse	protein_coding	63	0.0255528	0.0426514	-0.825	0.0046
12	65563351	65642107	ENSG00000174106	LEMD3	heart_atrial_appendage	protein_coding	31	0.0763859	0.00101806	1.59	0.0046
15	68483043	68498417	ENSG00000129007	CALML4	esophagus_gastroesophageal_junction	protein_coding	30	0.017613	0.00145591	-0.892	0.0046
19	21905568	21950430	ENSG00000197020	ZNF100	brain_anterior_cingulate_cortex_ba24	protein_coding	77	-0.0286199	0.000997728	-2.3	0.0046
1	233749750	233808258	ENSG00000135750	KCNK1	skin_sun_exposed_lower_leg	protein_coding	15	0.0843272	1.26161e-07	-0.266	0.00459
1	241753404	241840678	ENSG00000054277	OPN3	cells_ebv-transformed_lymphocytes	protein_coding	36	0.0404426	0.00184895	0.951	0.00459
10	104474295	104503249	ENSG00000156398	SFXN2	artery_aorta	protein_coding	63	0.00280979	0.0877158	-1.12	0.00459
16	78133310	79246564	ENSG00000186153	WWOX	artery_tibial	protein_coding	19	0.188571	1.20228e-17	0.559	0.00459
16	78133310	79246564	ENSG00000186153	WWOX	esophagus_muscularis	protein_coding	19	0.0811697	8.82188e-06	0.328	0.00459
1	231376953	231413719	ENSG00000116906	GNPAT	colon_transverse	protein_coding	15	0.111247	1.74015e-05	-0.321	0.00458
10	104613980	104624718	ENSG00000166275	C10orf32	colon_transverse	protein_coding	63	0.387114	1.19548e-19	0.757	0.00458
16	7.35484e+07	7.35484e+07	ENSG00000272250.1	RP11-346C20.4	esophagus_mucosa	lincRNA	59	0.0177701	0.0923466	-1.79	0.00458
19	5916150	5978153	ENSG00000031823	RANBP3	brain_hippocampus	protein_coding	69	0.000662876	0.00433722	-0.521	0.00458
19	21541734	21562101	ENSG00000172687	ZNF738	blood	protein_coding	77	0.00839981	0.000706673	1.66	0.00458
1	233749750	233808258	ENSG00000135750	KCNK1	esophagus_muscularis	protein_coding	15	0.146224	5.43179e-09	0.196	0.00457
1	243287730	243418650	ENSG00000143702	CEP170	pituitary	protein_coding	36	0.0319286	0.15606	4.42	0.00457
10	104221149	104236802	ENSG00000138111	TMEM180	nerve_tibial	protein_coding	63	0.338427	1.76522e-30	1.19	0.00457
16	78133310	79246564	ENSG00000186153	WWOX	adipose	protein_coding	19	0.172374	4.79273e-25	0.652	0.00457
5	1798500	1801480	ENSG00000171421	MRPL36	esophagus_muscularis	protein_coding	36	0.111542	2.67715e-08	-3.23	0.00457
8	33228342	33330940	ENSG00000172728	FUT10	skin_sun_exposed_lower_leg	protein_coding	10	0.217475	1.41518e-20	-0.448	0.00457
3	170213416	170214425	ENSG00000241416	KRT8P13	brain_hippocampus	pseudogene	50	0.0742275	0.00678814	1.53	0.00456
8	33218361	33218933	ENSG00000272338	RP11-722E23.2	pituitary	lincRNA	10	0.0804717	0.0191831	0.163	0.00456
8	33330904	33371119	ENSG00000129696	TTI2	testis	protein_coding	10	0.0326835	0.00460295	0.163	0.00456
1	233749750	233808258	ENSG00000135750	KCNK1	adipose_visceral_omentum	protein_coding	15	0.0402125	0.00141889	-0.13	0.00455
16	78133326	79246564	ENSG00000186153	WWOX	brain_dorsolateral_prefrontal_cortex	protein_coding	19	0.171699	2.11992e-20	1.05	0.00455
3	168645263	168645707	ENSG00000272797	RP11-368I23.3	brain_spinal_cord_cervical_c-1	lincRNA	50	0.0893339	0.0407572	-1.32	0.00455
1	232940643	232946092	ENSG00000212916	MAP10	small_intestine_terminal_ileum	protein_coding	15	0.0865738	0.00243732	-0.0736	0.00454
1	231376953	231413719	ENSG00000116906	GNPAT	nerve_tibial	protein_coding	15	0.174043	5.04529e-15	-0.117	0.00454
1	231468480	231473598	ENSG00000116903	EXOC8	adipose_visceral_omentum	protein_coding	15	0.033761	0.0461792	-0.221	0.00454
16	78133310	79246564	ENSG00000186153	WWOX	skin_not_sun_exposed_suprapubic	protein_coding	19	0.217304	1.07847e-17	-0.653	0.00454
19	22385930	22386805	ENSG00000268079	RP11-157B13.6	brain_spinal_cord_cervical_c-1	pseudogene	77	0.115829	0.0392359	2.59	0.00454
1	231472850	231490769	ENSG00000010072	SPRTN	adipose_subcutaneous	protein_coding	15	0.0208354	0.0105403	0.0818	0.00453
1	231154704	231175992	ENSG00000182118	FAM89A	brain_amygdala	protein_coding	15	0.293877	0.152307	0.133	0.00453
1	231376953	231413719	ENSG00000116906	GNPAT	brain_cerebellar_hemisphere	protein_coding	15	0.107593	0.000207943	0.133	0.00453
9	19926092	19929935	ENSG00000261402	RP11-378I6.1	brain_cortex	lincRNA	30	0.359787	5.15927e-09	-0.928	0.00453
1	243419320	243663394	ENSG00000054282	SDCCAG8	artery_coronary	protein_coding	36	0.075123	0.000347083	4.75	0.00452
10	105791044	105845760	ENSG00000065618	COL17A1	muscle_skeletal	protein_coding	63	0.0232956	0.178006	-1.08	0.00452
10	104221149	104236802	ENSG00000138111	TMEM180	liver	protein_coding	63	0.249097	1.53228e-08	1.06	0.00452
12	66741211	67197966	ENSG00000155974	GRIP1	brain_spinal_cord_cervical_c-1	protein_coding	31	0.202375	0.000224775	1.43	0.00452
19	8130286	8214730	ENSG00000142449	FBN3	heart_left_ventricle	protein_coding	69	0.217713	6.70886e-14	2.21	0.00452
1	233424614	233425193	ENSG00000231940	RPS7P3	skin_not_sun_exposed_suprapubic	pseudogene	15	0.0349776	0.001523	-0.0671	0.00451
10	104433488	104474164	ENSG00000138175	ARL3	ovary	protein_coding	63	0.0432075	0.0820759	1.13	0.00451
16	81040103	81066719	ENSG00000166451	CENPN	colon_transverse	protein_coding	19	0.0559838	1.11346e-07	-0.0491	0.00451
19	8386042	8388224	ENSG00000233927	RPS28	brain_anterior_cingulate_cortex_ba24	protein_coding	69	0.309439	2.408e-08	1.79	0.00451
19	21324827	21373034	ENSG00000196705	ZNF431	breast_mammary_tissue	protein_coding	77	0.00895976	0.16555	2.77	0.00451
16	81040103	81066719	ENSG00000166451	CENPN	esophagus_muscularis	protein_coding	19	0.0895945	9.25739e-07	-0.107	0.0045
5	443273	472052	ENSG00000180104	EXOC3	artery_aorta	protein_coding	36	0.165744	4.47694e-09	-2.29	0.0045
5	1.12163e+08	1.12163e+08	ENSG00000212643.1	ZRSR1	lung	protein_coding	20	0.0303004	0.031238	-1.93	0.0045
1	232940643	232946092	ENSG00000212916	MAP10	brain_nucleus_accumbens_basal_ganglia	protein_coding	15	-0.00430299	0.000837504	-0.0903	0.00449
1	231472850	231490769	ENSG00000010072	SPRTN	esophagus_mucosa	protein_coding	15	0.0752215	0.000456658	0.299	0.00449
1	244617679	244804479	ENSG00000179397	C1orf101	heart_atrial_appendage	protein_coding	36	0.0193152	0.0587704	0.307	0.00449
15	66585555	66626236	ENSG00000166938	DIS3L	heart_left_ventricle	protein_coding	30	0.109515	1.59794e-08	1.94	0.00449
16	71481500	71496998	ENSG00000167377	ZNF23	brain_hippocampus	protein_coding	59	0.0299853	0.0703367	-1.58	0.00449
5	112312399	112356667	ENSG00000172795	DCP2	artery_tibial	protein_coding	20	0.118947	7.59294e-09	0.747	0.00449
1	231376953	231413719	ENSG00000116906	GNPAT	esophagus_gastroesophageal_junction	protein_coding	15	0.177792	2.36377e-09	-0.187	0.00448
10	104404253	104418164	ENSG00000171206	TRIM8	brain_substantia_nigra	protein_coding	63	0.218925	0.000841846	0.826	0.00448
16	71392616	71424341	ENSG00000172137	CALB2	brain_putamen_basal_ganglia	protein_coding	59	-0.0739032	0.29403	-1.57	0.00448
16	81115566	81130008	ENSG00000140905	GCSH	brain_putamen_basal_ganglia	protein_coding	19	0.11578	0.0567992	0.0698	0.00448
19	21473962	21512227	ENSG00000182141	ZNF708	uterus	protein_coding	77	0.243818	0.0222743	-0.15	0.00448
19	21106028	21133503	ENSG00000105750	ZNF85	colon_sigmoid	protein_coding	77	0.102044	0.0602089	1.57	0.00448
5	304291	438406	ENSG00000063438	AHRR	esophagus_mucosa	protein_coding	36	0.00599655	0.172504	-2.95	0.00448
8	30891317	31031285	ENSG00000165392	WRN	colon_sigmoid	protein_coding	10	0.0676229	6.87421e-05	2.05	0.00448
1	231762560	232177016	ENSG00000162946	DISC1	blood	protein_coding	15	0.111502	5.3175e-34	0.000993	0.00447
1	233749750	233808258	ENSG00000135750	KCNK1	brain_amygdala	protein_coding	15	0.112879	0.183419	-0.169	0.00447
10	104674342	104675161	ENSG00000272912	RP11-724N1.1	brain_putamen_basal_ganglia	lincRNA	63	0.00879685	0.0977979	-0.699	0.00447
16	81115566	81130008	ENSG00000140905	GCSH	brain_nucleus_accumbens_basal_ganglia	protein_coding	19	0.0203754	0.0106266	0.705	0.00447
19	8554940	8567996	ENSG00000133246	PRAM1	muscle_skeletal	protein_coding	69	0.01283	0.00899543	1.65	0.00447
3	168244580	168244580	ENSG00000206120.7	EGFEM1P	adipose_subcutaneous	pseudogene	50	0.0177302	0.0205579	-1.29	0.00447
1	231762561	232177018	ENSG00000162946	DISC1	nerve_tibial	protein_coding	15	0.176495	7.30377e-13	-0.17	0.00446
1	231762561	232177018	ENSG00000162946	DISC1	brain_nucleus_accumbens_basal_ganglia	protein_coding	15	0.106627	0.00716624	-0.0175	0.00446
1	243287730	243418650	ENSG00000143702	CEP170	heart_atrial_appendage	protein_coding	36	0.0485227	0.000212388	3.24	0.00446
16	78133310	79246564	ENSG00000186153	WWOX	brain_substantia_nigra	protein_coding	19	0.288396	0.0145669	0.289	0.00446
16	79539500	79550190	ENSG00000261472	RP11-467I17.1	small_intestine_terminal_ileum	lincRNA	19	0.0401769	0.0205568	0.6	0.00446
1	231154704	231175992	ENSG00000182118	FAM89A	liver	protein_coding	15	0.134001	0.0356903	-0.115	0.00445
1	243218163	243219696	ENSG00000253326	RP11-261C10.7	muscle_skeletal	pseudogene	36	0.00784962	0.134602	-1.4	0.00445
12	65294017	65294017	ENSG00000255693.1	RP11-766N7.3	brain_anterior_cingulate_cortex_ba24	lincRNA	31	0.064519	0.0931622	-1.37	0.00445
15	66628544	66679084	ENSG00000075131	TIPIN	stomach	protein_coding	30	0.306412	1.13351e-15	1.16	0.00445
16	71671738	71758604	ENSG00000040199	PHLPP2	esophagus_gastroesophageal_junction	protein_coding	59	0.0272161	0.0080759	-1.66	0.00445
19	6729925	6737614	ENSG00000125734	GPR108	thyroid	protein_coding	69	0.357938	1.88097e-27	-1.33	0.00445
1	243218163	243219696	ENSG00000253326	RP11-261C10.7	brain_cerebellar_hemisphere	pseudogene	36	0.0616005	0.287022	0.381	0.00444
16	78133310	79246564	ENSG00000186153	WWOX	heart_atrial_appendage	protein_coding	19	0.165055	3.38571e-07	-0.479	0.00444
3	169755733	169803184	ENSG00000173890	GPR160	blood	protein_coding	50	0.0170269	2.30779e-06	1.5	0.00444
15	68560130	68570332	ENSG00000260657	RP11-315D16.4	esophagus_muscularis	lincRNA	30	0.251153	1.60287e-17	1.1	0.00443
16	72088522	72111145	ENSG00000261701	HPR	nerve_tibial	protein_coding	59	0.142494	2.29953e-11	-1.21	0.00443
1	233424614	233425193	ENSG00000231940	RPS7P3	esophagus_gastroesophageal_junction	pseudogene	15	0.032629	0.0880444	-0.0924	0.00442
1	231762561	232177018	ENSG00000162946	DISC1	small_intestine_terminal_ileum	protein_coding	15	0.147303	0.0881533	-0.11	0.00442
1	231762561	232177018	ENSG00000162946	DISC1	esophagus_gastroesophageal_junction	protein_coding	15	0.0692002	0.0212861	-0.187	0.00442
5	112357796	112824527	ENSG00000171444	MCC	skin_sun_exposed_lower_leg	protein_coding	20	0.19097	1.13838e-16	-1.64	0.00442
9	17579080	17797127	ENSG00000107295	SH3GL2	thyroid	protein_coding	30	0.358814	5.50651e-32	1.16	0.00442
1	233749750	233808258	ENSG00000135750	KCNK1	artery_tibial	protein_coding	15	0.0751481	2.6349e-06	0.0984	0.00441
1	231664399	231702270	ENSG00000116918	TSNAX	spleen	protein_coding	15	0.0609669	0.301413	0.172	0.00441
1	243419320	243663394	ENSG00000054282	SDCCAG8	thyroid	protein_coding	36	0.0834271	1.85135e-07	4.98	0.00441
3	169511216	169530774	ENSG00000171757	LRRC34	adrenal_gland	protein_coding	50	0.0928482	0.000120145	4.9	0.00441
1	231376953	231413719	ENSG00000116906	GNPAT	uterus	protein_coding	15	0.174748	0.000687755	0.112	0.0044
19	22235254	22274282	ENSG00000197134	ZNF257	artery_aorta	protein_coding	77	0.229619	2.14962e-13	4.25	0.0044
12	66627859	66629014	ENSG00000225422	RBMS1P1	small_intestine_terminal_ileum	pseudogene	31	0.0205203	0.157455	-1.21	0.00439
16	69984810	69998141	ENSG00000157335	CLEC18C	lung	protein_coding	59	0.357723	2.76287e-31	1.46	0.00439
1	231154704	231175992	ENSG00000182118	FAM89A	cells_transformed_fibroblasts	protein_coding	15	0.0982858	4.95243e-05	-0.132	0.00438
10	104629273	104661656	ENSG00000214435	AS3MT	lung	protein_coding	63	0.282112	2.73149e-22	-0.47	0.00438
15	66018392	66184329	ENSG00000103769	RAB11A	skin_sun_exposed_lower_leg	protein_coding	30	0.0607048	1.79467e-05	1.21	0.00437
9	2.08231e+07	2.08231e+07	ENSG00000227071.1	RP11-4E23.2	muscle_skeletal	lincRNA	30	0.0234549	0.0103477	0.837	0.00435
9	19053141	19103117	ENSG00000147874	HAUS6	nerve_tibial	protein_coding	30	0.0426649	0.000607937	-4.06	0.00435
1	243287730	243418650	ENSG00000143702	CEP170	thyroid	protein_coding	36	0.00479581	0.0189375	0.148	0.00434
10	105156405	105206049	ENSG00000148843	PDCD11	skin_not_sun_exposed_suprapubic	protein_coding	63	0.0891396	6.13954e-10	-1.24	0.00434
19	20107867	20150315	ENSG00000197124	ZNF682	muscle_skeletal	protein_coding	77	0.291383	1.36187e-31	1.65	0.00434
10	105156405	105206049	ENSG00000148843	PDCD11	esophagus_muscularis	protein_coding	63	0.0291546	4.29451e-07	-1.22	0.00433
15	66782473	66790151	ENSG00000174446	SNAPC5	lung	protein_coding	30	0.0490973	0.00131874	-2.22	0.00433
10	103911933	103923627	ENSG00000166197	NOLC1	muscle_skeletal	protein_coding	63	0.0225093	0.110298	-1.19	0.00432
8	33218361	33218933	ENSG00000272338	RP11-722E23.2	liver	lincRNA	10	0.0116608	0.215773	1.63	0.00432
15	40820882	40857256	ENSG00000128891	C15orf57	brain_cortex	protein_coding	47	0.117836	0.00015876	2.46	0.0043
5	112312399	112356667	ENSG00000172795	DCP2	uterus	protein_coding	20	0.0476861	0.162049	-3.99	0.0043
9	20658308	20995954	ENSG00000188352	FOCAD	lung	protein_coding	30	0.0116069	0.149318	-1.07	0.0043
19	8130286	8214730	ENSG00000142449	FBN3	muscle_skeletal	protein_coding	69	0.308102	5.99443e-34	1.97	0.00429
3	171318195	171528740	ENSG00000075651	PLD1	lung	protein_coding	50	0.207238	9.47469e-13	-1.1	0.00429
1	243209242	243209242	ENSG00000214837.4	RP11-261C10.3	skin_sun_exposed_lower_leg	lincRNA	36	0.0199564	0.00842666	-2.6	0.00428
10	105156405	105206049	ENSG00000148843	PDCD11	breast_mammary_tissue	protein_coding	63	0.0830005	1.58545e-05	-1.2	0.00428
19	21565667	21569979	ENSG00000213976	CTD-2561J22.2	brain_cerebellum	pseudogene	77	0.180221	0.000684362	1.1	0.00428
1	241792155	241799232	ENSG00000203668	CHML	heart_left_ventricle	protein_coding	36	0.0134148	0.0301398	-0.527	0.00427
10	104605352	104605707	ENSG00000236937	PTGES3P4	adrenal_gland	pseudogene	63	-0.0206146	0.0734632	0.736	0.00427
10	104503727	104576021	ENSG00000166272	WBP1L	brain_putamen_basal_ganglia	protein_coding	63	0.0579921	0.0440289	0.926	0.00427
18	670324	712676	ENSG00000132199	ENOSF1	adrenal_gland	protein_coding	35	0.272948	2.14363e-12	3.68	0.00427
5	111478138	111755013	ENSG00000129595	EPB41L4A	heart_atrial_appendage	protein_coding	20	0.167101	1.17597e-10	-3.5	0.00427
9	20341663	20622542	ENSG00000171843	MLLT3	testis	protein_coding	30	0.0468663	0.000415456	-0.558	0.00427
10	103825147	103827792	ENSG00000166189	HPS6	whole_blood	protein_coding	63	0.175963	4.53896e-16	1.08	0.00426
10	105156405	105206049	ENSG00000148843	PDCD11	artery_aorta	protein_coding	63	0.1328	6.51684e-09	-1.2	0.00426
12	66517697	66563765	ENSG00000155957	TMBIM4	cells_ebv-transformed_lymphocytes	protein_coding	31	0.264819	0.00488679	0.0543	0.00424
19	21892324	21892993	ENSG00000268535	RP11-420K14.3	artery_tibial	pseudogene	77	0.0742797	4.40431e-06	-2.11	0.00424
5	112196919	112205485	ENSG00000153037	SRP19	pituitary	protein_coding	20	0.095761	4.35835e-08	1.44	0.00424
5	112849380	112930982	ENSG00000047188	YTHDC2	esophagus_gastroesophageal_junction	protein_coding	20	0.0405883	0.00934491	1.44	0.00424
10	104975466	104976557	ENSG00000229256	ST13P13	artery_tibial	pseudogene	63	0.0374614	0.0417589	1.2	0.00423
9	19115323	19127577	ENSG00000147872	PLIN2	blood	protein_coding	30	0.10119	7.21763e-31	0.168	0.00423
10	105253734	105352309	NEURL	NEURL	brain_dorsolateral_prefrontal_cortex	NA	63	0.022566	0.00079304	-0.97	0.00422
16	71671738	71758604	ENSG00000040199	PHLPP2	esophagus_muscularis	protein_coding	59	0.0519066	0.000840022	-1.39	0.00422
1	243218163	243219696	ENSG00000253326	RP11-261C10.7	small_intestine_terminal_ileum	pseudogene	36	0.13334	0.17806	-2.26	0.00421
1	243651535	244014381	ENSG00000117020	AKT3	esophagus_mucosa	protein_coding	36	0.0492459	0.00707052	1.29	0.00421
10	104845940	104953056	ENSG00000076685	NT5C2	brain_cerebellar_hemisphere	protein_coding	63	0.0420132	0.000162903	0.811	0.00421
15	68112042	68126899	ENSG00000188779	SKOR1	ovary	protein_coding	30	0.177861	0.000625967	1.07	0.00421
19	22638790	22639261	ENSG00000270947	AC025811.3	brain_caudate_basal_ganglia	lincRNA	77	0.097635	0.0294335	-2.19	0.00421
5	111478138	111755013	ENSG00000129595	EPB41L4A	brain_cortex	protein_coding	20	0.0364851	0.0118022	-3.42	0.00421
15	66585555	66626236	ENSG00000166938	DIS3L	brain_frontal_cortex_ba9	protein_coding	30	0.0770468	0.00666367	2.47	0.00419
16	70284134	70285833	ENSG00000223496	EXOSC6	colon_transverse	protein_coding	59	0.300146	8.77681e-17	-1.25	0.00419
1	241753404	241840678	ENSG00000054277	OPN3	skin_not_sun_exposed_suprapubic	protein_coding	36	0.023711	0.00998414	0.522	0.00417
10	104183002	104192418	ENSG00000107874	CUEDC2	thyroid	protein_coding	63	0.0259877	0.169911	-1.04	0.00417
19	7587512	7598895	ENSG00000090674	MCOLN1	lung	protein_coding	69	0.0211426	0.0637662	-0.399	0.00417
19	22235254	22274282	ENSG00000197134	ZNF257	uterus	protein_coding	77	-0.000904036	0.128605	3.57	0.00417
5	112212084	112258236	ENSG00000129625	REEP5	skin_not_sun_exposed_suprapubic	protein_coding	20	0.104082	4.43206e-08	0.401	0.00417
9	19926092	19929935	ENSG00000261402	RP11-378I6.1	brain_caudate_basal_ganglia	lincRNA	30	0.289329	0.00197382	0.604	0.00417
1	243218163	243219696	ENSG00000253326	RP11-261C10.7	pancreas	pseudogene	36	0.0237662	0.0994014	-2.09	0.00416
5	112312399	112356667	ENSG00000172795	DCP2	lung	protein_coding	20	0.099907	1.30656e-12	-0.537	0.00416
10	104402549	104403897	ENSG00000272933	RP11-47A8.5	brain_nucleus_accumbens_basal_ganglia	lincRNA	63	0.0923465	0.144871	1.06	0.00415
9	19230433	19374139	ENSG00000137145	DENND4C	brain_cerebellum	protein_coding	30	0.0360276	0.102377	0.694	0.00415
10	104221149	104236802	ENSG00000138111	TMEM180	muscle_skeletal	protein_coding	63	0.0315064	0.00127246	-1.01	0.00414
9	19230433	19374139	ENSG00000137145	DENND4C	cells_transformed_fibroblasts	protein_coding	30	0.170338	1.10684e-10	-0.633	0.00414
15	66628544	66679084	ENSG00000075131	TIPIN	breast_mammary_tissue	protein_coding	30	0.137372	2.65753e-09	0.116	0.00413
8	33342268	33358778	ENSG00000198042	MAK16	thyroid	protein_coding	10	0.0241593	0.0508283	0.686	0.00413
12	64616117	64790845	ENSG00000243024	RPS11P6	brain_spinal_cord_cervical_c-1	pseudogene	31	0.0303864	0.214047	-1.01	0.00412
15	69365266	69388160	ENSG00000212766	LINC00277	brain_amygdala	lincRNA	30	-0.0949474	0.115574	0.666	0.00412
19	21987752	22034927	ENSG00000198521	ZNF43	cells_ebv-transformed_lymphocytes	protein_coding	77	0.0664685	0.0255561	3.23	0.00412
3	169511216	169530774	ENSG00000171757	LRRC34	muscle_skeletal	protein_coding	50	0.0205311	8.99561e-05	3.72	0.00412
19	21933549	21936240	ENSG00000269845	RP11-420K14.6	colon_transverse	pseudogene	77	0.0553878	0.102721	-3.02	0.00411
19	22235254	22274282	ENSG00000197134	ZNF257	brain_nucleus_accumbens_basal_ganglia	protein_coding	77	0.269147	2.11688e-06	5.78	0.00411
5	1008944	1039058	ENSG00000145506	NKD2	brain_anterior_cingulate_cortex_ba24	protein_coding	36	0.161285	1.99031e-07	3.6	0.00411
12	65563351	65642107	ENSG00000174106	LEMD3	brain_frontal_cortex_ba9	protein_coding	31	0.0196534	0.0216649	0.927	0.0041
9	20995306	21031635	ENSG00000188921	PTPLAD2	minor_salivary_gland	protein_coding	30	0.0522695	0.350149	0.528	0.0041
12	66517697	66563765	ENSG00000155957	TMBIM4	skin_sun_exposed_lower_leg	protein_coding	31	0.0443955	0.000135071	-0.226	0.00409
1	241753404	241840678	ENSG00000054277	OPN3	skin_sun_exposed_lower_leg	protein_coding	36	-0.00274892	0.17486	-0.788	0.00408
12	65275768	65275768	ENSG00000255693.1	RP11-766N7.3	brain_cerebellar_hemisphere	lincRNA	31	0.180212	4.39289e-05	0.602	0.00408
5	112043195	112181936	ENSG00000134982	APC	adrenal_gland	protein_coding	20	0.020135	0.12973	0.752	0.00408
15	41795836	41806085	ENSG00000062524	LTK	artery_tibial	protein_coding	47	0.0303615	7.11242e-05	4.61	0.00407
15	40731920	40760441	ENSG00000140320	BAHD1	esophagus_muscularis	protein_coding	47	0.107208	2.00677e-06	-3.08	0.00407
5	111045079	111045079	ENSG00000224032.2	EPB41L4A-AS1	brain_cerebellum	lincRNA	20	0.0413839	0.0257447	-0.875	0.00407
15	40226347	40327797	ENSG00000128829	EIF2AK4	testis	protein_coding	47	0.0377064	0.176617	2.51	0.00406
10	104613980	104624718	ENSG00000166275	C10orf32	muscle_skeletal	protein_coding	63	0.0283063	0.0111253	0.721	0.00405
18	670324	712676	ENSG00000132199	ENOSF1	skin_sun_exposed_lower_leg	protein_coding	35	0.128808	1.54383e-11	-0.37	0.00405
19	7660788	7683190	ENSG00000076826	CAMSAP3	skin_sun_exposed_lower_leg	protein_coding	69	0.0543224	5.34915e-05	1.36	0.00405
19	22115760	22193751	ENSG00000160321	ZNF208	cells_transformed_fibroblasts	protein_coding	77	0.0579056	0.0047094	0.195	0.00405
19	21106028	21133503	ENSG00000105750	ZNF85	adipose_subcutaneous	protein_coding	77	0.0419062	6.49217e-06	1.95	0.00405
10	104613980	104624718	ENSG00000166275	C10orf32	artery_aorta	protein_coding	63	0.297873	3.03038e-19	0.426	0.00404
12	66517697	66563765	ENSG00000155957	TMBIM4	ovary	protein_coding	31	0.00118078	0.222662	0.779	0.00404
16	71481500	71496998	ENSG00000167377	ZNF23	pancreas	protein_coding	59	0.132087	1.61749e-06	-1.37	0.00404
16	71879894	71919171	ENSG00000224470	ATXN1L	testis	protein_coding	59	-0.0105794	0.0553101	1.81	0.00404
19	21371401	21371756	ENSG00000268995	VN1R82P	esophagus_mucosa	pseudogene	77	0.0209344	0.134871	0.482	0.00404
19	22248630	22249200	ENSG00000269742	CTB-135N1.2	spleen	pseudogene	77	0.0448847	0.055197	5.98	0.00404
1	242246288	242687998	ENSG00000180287	PLD5	brain_cerebellar_hemisphere	protein_coding	36	0.111267	0.000605092	-0.273	0.00403
10	105062553	105110891	ENSG00000156374	PCGF6	colon_transverse	protein_coding	63	0.0595747	0.101132	1.07	0.00403
9	19026890	19028127	ENSG00000236680	RP11-296P7.4	pituitary	pseudogene	30	0.0536748	0.18669	-2.62	0.00403
10	104613980	104624718	ENSG00000166275	C10orf32	heart_left_ventricle	protein_coding	63	0.360063	2.45875e-22	-0.29	0.00402
16	72042487	72058954	ENSG00000102967	DHODH	adipose_visceral_omentum	protein_coding	59	0.0758452	1.18203e-06	2.01	0.00402
19	8386042	8388224	ENSG00000233927	RPS28	colon_sigmoid	protein_coding	69	0.163552	1.2861e-11	-2.02	0.00402
5	112312399	112356667	ENSG00000172795	DCP2	prostate	protein_coding	20	0.0656779	0.0021351	-1.97	0.00402
9	19230433	19374139	ENSG00000137145	DENND4C	nerve_tibial	protein_coding	30	0.0964481	4.6238e-08	1.07	0.00402
10	104404253	104418164	ENSG00000171206	TRIM8	liver	protein_coding	63	0.0300679	0.0451911	-0.976	0.00401
3	171561139	171656505	ENSG00000186329	TMEM212	testis	protein_coding	50	0.108063	0.000593384	1.48	0.00401
1	243218163	243219696	ENSG00000253326	RP11-261C10.7	breast_mammary_tissue	pseudogene	36	0.108862	2.31108e-06	-1.86	0.004
10	103585731	103603677	ENSG00000120049	KCNIP2	adipose_subcutaneous	protein_coding	63	0.0372282	0.0718528	1.16	0.004
15	40820882	40857256	ENSG00000128891	C15orf57	pituitary	protein_coding	47	0.34175	4.26664e-15	2.78	0.004
5	112312399	112356667	ENSG00000172795	DCP2	brain_nucleus_accumbens_basal_ganglia	protein_coding	20	0.0179907	0.23545	0.7	0.004
5	111964133	111967797	ENSG00000250358	RP11-159K7.2	pituitary	lincRNA	20	-0.03504	0.0853595	-1.42	0.004
6	43445261	43474294	ENSG00000137221	TJAP1	esophagus_gastroesophageal_junction	protein_coding	32	0.0906623	0.00568768	1.87	0.004
9	20995306	21031635	ENSG00000188921	PTPLAD2	brain_cortex	protein_coding	30	-0.0756739	0.0668836	1.02	0.004
18	596997	650293	ENSG00000079101	CLUL1	brain_dorsolateral_prefrontal_cortex	protein_coding	35	0.294633	3.26264e-36	-0.782	0.00399
3	170136653	170578169	ENSG00000013297	CLDN11	colon_sigmoid	protein_coding	50	0.0249092	0.0557758	-0.487	0.00399
19	8271620	8327305	ENSG00000090661	CERS4	esophagus_mucosa	protein_coding	69	0.103748	3.76653e-06	1.65	0.00397
5	111478138	111755013	ENSG00000129595	EPB41L4A	nerve_tibial	protein_coding	20	0.245922	4.77005e-19	-3.27	0.00397
9	19926092	19929935	ENSG00000261402	RP11-378I6.1	brain_amygdala	lincRNA	30	0.157234	3.45128e-06	-0.901	0.00397
9	19053141	19103117	ENSG00000147874	HAUS6	thyroid	protein_coding	30	0.0468023	0.011194	-2.52	0.00397
10	104935311	104935851	ENSG00000213277	MARCKSL1P1	nerve_tibial	pseudogene	63	0.0545136	0.000132534	0.68	0.00396
16	71671738	71758604	ENSG00000040199	PHLPP2	muscle_skeletal	protein_coding	59	0.170043	8.61746e-16	-1.57	0.00396
19	21473962	21512227	ENSG00000182141	ZNF708	artery_coronary	protein_coding	77	0.015524	0.234325	0.972	0.00396
3	169122837	169122837	ENSG00000270141.2	TERC	cells_transformed_fibroblasts	lincRNA	50	0.0301683	0.0863558	-0.916	0.00396
5	1798500	1801480	ENSG00000171421	MRPL36	brain_cerebellar_hemisphere	protein_coding	36	0.0669201	0.000392772	-2.33	0.00396
1	241753404	241840678	ENSG00000054277	OPN3	whole_blood	protein_coding	36	0.0910238	9.41177e-08	0.788	0.00395
10	104845940	104953056	ENSG00000076685	NT5C2	adipose_visceral_omentum	protein_coding	63	0.139145	5.21886e-08	-1.03	0.00395
10	104503727	104576021	ENSG00000166272	WBP1L	esophagus_mucosa	protein_coding	63	0.147365	2.34466e-11	0.868	0.00395
10	104183002	104192418	ENSG00000107874	CUEDC2	brain_cerebellar_hemisphere	protein_coding	63	0.0390876	0.0625491	1.04	0.00395
18	657604	673578	ENSG00000176890	TYMS	esophagus_muscularis	protein_coding	35	0.232845	8.28218e-15	3.12	0.00395
5	1.12151e+08	1.12151e+08	ENSG00000212643.1	ZRSR1	skin_not_sun_exposed_suprapubic	protein_coding	20	0.111098	1.70767e-07	0.223	0.00395
9	19200333	19201044	ENSG00000232176	RP11-146N23.1	ovary	pseudogene	30	0.00686047	0.18438	1.01	0.00395
1	241792155	241799232	ENSG00000203668	CHML	adipose_subcutaneous	protein_coding	36	0.278811	7.96824e-22	-0.527	0.00394
12	65107225	65153227	ENSG00000135677	GNS	heart_atrial_appendage	protein_coding	31	0.152348	1.01872e-07	-0.971	0.00394
15	67493371	67547533	ENSG00000103591	AAGAB	esophagus_muscularis	protein_coding	30	0.0296462	0.00122157	-3.7	0.00394
16	72088491	72094954	ENSG00000257017	HP	nerve_tibial	protein_coding	59	0.138821	1.04302e-06	-1.74	0.00394
16	71879899	71962913	ENSG00000182149	IST1	brain_spinal_cord_cervical_c-1	protein_coding	59	0.0292465	0.0458322	-0.437	0.00394
19	6772725	6857377	ENSG00000141968	VAV1	nerve_tibial	protein_coding	69	0.0147896	0.00537193	1.55	0.00394
5	111478138	111755013	ENSG00000129595	EPB41L4A	skin_sun_exposed_lower_leg	protein_coding	20	0.36848	1.1391e-35	-3.21	0.00394
10	105156405	105206049	ENSG00000148843	PDCD11	esophagus_mucosa	protein_coding	63	0.0672081	0.00480665	-1.15	0.00393
16	71671738	71758604	ENSG00000040199	PHLPP2	pancreas	protein_coding	59	0.0223893	0.0750579	-1.44	0.00393
5	196986	218330	ENSG00000164366	CCDC127	heart_atrial_appendage	protein_coding	36	0.0363609	0.0401634	1.33	0.00393
16	71315292	71323618	ENSG00000180917	CMTR2	adipose	protein_coding	59	0.0163068	0.00140662	1.4	0.00392
5	112212084	112258236	ENSG00000129625	REEP5	esophagus_muscularis	protein_coding	20	0.196519	1.64794e-11	-2.31	0.00392
1	243218163	243219696	ENSG00000253326	RP11-261C10.7	spleen	pseudogene	36	0.186247	2.08048e-05	-3.42	0.00391
5	112196919	112205485	ENSG00000153037	SRP19	artery_aorta	protein_coding	20	0.0302135	0.13285	-3.11	0.00391
1	243227390	243227390	ENSG00000214837.4	RP11-261C10.3	testis	lincRNA	36	0.100503	7.56154e-06	1	0.0039
15	41624892	41673248	ENSG00000137804	NUSAP1	muscle_skeletal	protein_coding	47	0.0781125	1.3026e-07	4.33	0.0039
15	68560130	68570332	ENSG00000260657	RP11-315D16.4	esophagus_gastroesophageal_junction	lincRNA	30	0.285906	1.03984e-15	0.968	0.0039
16	72078188	72128330	ENSG00000140830	TXNL4B	artery_tibial	protein_coding	59	0.0407304	0.0535207	0.475	0.0039
1	243651535	244014381	ENSG00000117020	AKT3	minor_salivary_gland	protein_coding	36	0.127325	0.00845743	0.198	0.00389
5	450710	450710	ENSG00000221990.2	C5orf55	adipose_subcutaneous	protein_coding	36	0.266305	4.92241e-21	-2.17	0.00389
9	20341663	20622542	ENSG00000171843	MLLT3	thyroid	protein_coding	30	0.0796363	3.00822e-06	-0.704	0.00389
9	19926092	19929935	ENSG00000261402	RP11-378I6.1	brain_hippocampus	lincRNA	30	0.140653	0.00426208	-0.615	0.00389
10	104209573	104216050	LOC100505761	LOC100505761	brain_dorsolateral_prefrontal_cortex	NA	63	0.137732	1.99267e-16	-0.725	0.00388
10	104221149	104236802	ENSG00000138111	TMEM180	brain_substantia_nigra	protein_coding	63	0.0732582	0.0196222	0.891	0.00387
15	67493371	67547533	ENSG00000103591	AAGAB	brain_anterior_cingulate_cortex_ba24	protein_coding	30	0.0818346	0.0043522	-0.88	0.00387
3	169755717	169803191	ENSG00000173890	GPR160	adipose	protein_coding	50	0.0992368	1.23942e-14	1.87	0.00386
1	243287730	243418650	ENSG00000143702	CEP170	skin_sun_exposed_lower_leg	protein_coding	36	0.0229927	0.0130009	4.02	0.00385
1	243419320	243663394	ENSG00000054282	SDCCAG8	colon_transverse	protein_coding	36	0.120568	0.00113051	4.32	0.00385
10	104503727	104576021	ENSG00000166272	WBP1L	whole_blood	protein_coding	63	0.0380261	0.097437	0.953	0.00385
10	103585731	103603677	ENSG00000120049	KCNIP2	cells_transformed_fibroblasts	protein_coding	63	0.0192709	0.00936088	-0.942	0.00385
1	243218163	243219696	ENSG00000253326	RP11-261C10.7	cells_ebv-transformed_lymphocytes	pseudogene	36	0.0241595	0.00259695	-0.451	0.00384
5	304291	438406	ENSG00000063438	AHRR	thyroid	protein_coding	36	0.015669	0.0983374	1.45	0.00384
5	111478138	111755013	ENSG00000129595	EPB41L4A	lung	protein_coding	20	0.181489	8.11124e-18	-2.82	0.00384
8	33228342	33330940	ENSG00000172728	FUT10	artery_coronary	protein_coding	10	0.160131	2.45179e-05	-0.564	0.00384
1	243218163	243219696	ENSG00000253326	RP11-261C10.7	artery_tibial	pseudogene	36	0.0848479	3.31842e-07	-1.94	0.00383
10	104613966	104624718	C10orf32	C10orf32	blood	NA	63	0.0245021	1.7112e-08	0.462	0.00383
10	104935311	104935851	ENSG00000213277	MARCKSL1P1	colon_sigmoid	pseudogene	63	0.024086	0.0318429	0.656	0.00383
10	105791044	105845760	ENSG00000065618	COL17A1	whole_blood	protein_coding	63	0.0970158	5.9102e-12	-0.742	0.00383
16	70514471	70557468	ENSG00000103051	COG4	ovary	protein_coding	59	0.190336	0.0199724	-1.48	0.00383
5	1253262	1295184	ENSG00000164362	TERT	brain_caudate_basal_ganglia	protein_coding	36	0.0310328	0.0346967	4.8	0.00383
1	243419320	243663394	ENSG00000054282	SDCCAG8	skin_sun_exposed_lower_leg	protein_coding	36	0.0333368	0.00202975	2.57	0.00382
10	104162376	104181296	ENSG00000059915	PSD	brain_cerebellar_hemisphere	protein_coding	63	-0.0217592	0.0164085	0.926	0.00382
10	104263744	104393292	ENSG00000107882	SUFU	skin_sun_exposed_lower_leg	protein_coding	63	0.0488029	8.17963e-05	0.637	0.00382
10	104629273	104661656	ENSG00000214435	AS3MT	adipose_subcutaneous	protein_coding	63	0.534705	1.551e-52	-0.153	0.00382
10	104613980	104624718	ENSG00000166275	C10orf32	brain_hypothalamus	protein_coding	63	0.211358	1.60671e-05	0.788	0.00382
15	40820882	40857256	ENSG00000128891	C15orf57	ovary	protein_coding	47	0.522375	2.31898e-15	0.333	0.00382
16	72042487	72058954	ENSG00000102967	DHODH	vagina	protein_coding	59	-0.0172187	0.0250988	1.72	0.00381
3	169511216	169530774	ENSG00000171757	LRRC34	thyroid	protein_coding	50	0.0696777	1.79416e-06	4.63	0.00381
1	244617679	244804479	ENSG00000179397	C1orf101	testis	protein_coding	36	0.318747	3.83809e-16	-1.3	0.0038
1	244214585	244220778	ENSG00000179456	ZBTB18	muscle_skeletal	protein_coding	36	0.0590495	4.55379e-07	-4.31	0.0038
10	103867317	103880210	ENSG00000198728	LDB1	brain_putamen_basal_ganglia	protein_coding	63	-0.008754	0.166663	1.04	0.0038
16	70557691	70608820	ENSG00000189091	SF3B3	heart_atrial_appendage	protein_coding	59	0.0695157	2.44789e-05	1.46	0.0038
19	7660788	7683190	ENSG00000076826	CAMSAP3	heart_left_ventricle	protein_coding	69	0.0210338	0.0608605	-2.19	0.0038
5	112849380	112930982	ENSG00000047188	YTHDC2	cells_ebv-transformed_lymphocytes	protein_coding	20	0.030559	0.023997	-0.562	0.0038
10	104613980	104624718	ENSG00000166275	C10orf32	esophagus_mucosa	protein_coding	63	0.417234	1.06047e-34	0.42	0.00379
10	104613980	104624718	ENSG00000166275	C10orf32	minor_salivary_gland	protein_coding	63	0.0455718	0.00140646	0.49	0.00379
12	67745216	67745819	ENSG00000256037	MRPL40P1	adipose_subcutaneous	pseudogene	31	0.0427978	0.0011259	-1.26	0.00379
12	67663061	67713731	ENSG00000111530	CAND1	adipose_visceral_omentum	protein_coding	31	0.101622	2.25478e-05	-1.26	0.00379
1	241695434	241758944	ENSG00000117009	KMO	blood	protein_coding	36	0.0602086	5.40921e-19	0.397	0.00378
10	104590288	104597290	ENSG00000148795	CYP17A1	artery_aorta	protein_coding	63	0.00448397	0.0941777	-0.749	0.00378
16	71315292	71323618	ENSG00000180917	CMTR2	adipose_visceral_omentum	protein_coding	59	0.143677	8.31823e-10	1.08	0.00378
16	71879899	71962913	ENSG00000182149	IST1	skin_sun_exposed_lower_leg	protein_coding	59	0.051842	0.00118736	-0.716	0.00378
19	22779059	22786352	ENSG00000269332	CTC-457E21.3	thyroid	pseudogene	77	0.0648526	1.46842e-05	2.42	0.00378
5	111478138	111755013	ENSG00000129595	EPB41L4A	esophagus_mucosa	protein_coding	20	0.0673667	1.20753e-07	-3.23	0.00378
12	65563351	65642107	ENSG00000174106	LEMD3	esophagus_muscularis	protein_coding	31	0.112109	5.10844e-10	0.723	0.00377
16	72042487	72058954	ENSG00000102967	DHODH	brain_cortex	protein_coding	59	0.126056	5.55744e-05	-2.74	0.00377
3	170136653	170578169	ENSG00000013297	CLDN11	muscle_skeletal	protein_coding	50	0.195627	6.21067e-18	-1.7	0.00377
3	169490619	169507504	ENSG00000085274	MYNN	heart_atrial_appendage	protein_coding	50	0.0225066	0.0657707	0.532	0.00377
5	112221005	112221005	ENSG00000212643.1	ZRSR1	brain_cerebellum	protein_coding	20	0.0424432	0.185258	-1.24	0.00377
1	241753404	241840678	ENSG00000054277	OPN3	lung	protein_coding	36	0.0903629	5.52235e-09	-1.01	0.00376
1	243218163	243219696	ENSG00000253326	RP11-261C10.7	minor_salivary_gland	pseudogene	36	0.110647	0.0467193	-1.67	0.00376
10	104629273	104661656	ENSG00000214435	AS3MT	skin_sun_exposed_lower_leg	protein_coding	63	0.418483	6.58037e-42	-0.184	0.00376
10	104433488	104474164	ENSG00000138175	ARL3	skin_not_sun_exposed_suprapubic	protein_coding	63	0.0333272	0.0961651	-0.939	0.00376
16	72042487	72058954	ENSG00000102967	DHODH	esophagus_gastroesophageal_junction	protein_coding	59	0.243602	1.91498e-13	2.14	0.00376
19	22235254	22274282	ENSG00000197134	ZNF257	breast_mammary_tissue	protein_coding	77	0.314637	9.04878e-16	4.72	0.00376
19	20011722	20046384	ENSG00000184635	ZNF93	nerve_tibial	protein_coding	77	0.0207038	0.0584026	-1.95	0.00376
9	17579080	17797127	ENSG00000107295	SH3GL2	brain_frontal_cortex_ba9	protein_coding	30	0.0952572	1.40165e-05	0.8	0.00376
10	104629273	104661656	ENSG00000214435	AS3MT	muscle_skeletal	protein_coding	63	0.462903	2.0685e-59	-0.218	0.00375
16	70286198	70323446	ENSG00000090861	AARS	pituitary	protein_coding	59	0.0755582	0.00104561	1.48	0.00375
19	21264965	21308073	ENSG00000160352	ZNF714	whole_blood	protein_coding	77	-0.00287678	0.234693	-1.73	0.00375
10	104629273	104661656	ENSG00000214435	AS3MT	brain_cerebellum	protein_coding	63	0.366587	5.1599e-13	-0.263	0.00374
10	104590288	104597290	ENSG00000148795	CYP17A1	nerve_tibial	protein_coding	63	0.0410429	0.00117785	-0.86	0.00374
8	33218361	33218933	ENSG00000272338	RP11-722E23.2	stomach	lincRNA	10	0.0453741	0.0388207	-0.509	0.00374
10	104474295	104503249	ENSG00000156398	SFXN2	cells_ebv-transformed_lymphocytes	protein_coding	63	0.422638	2.5938e-08	0.577	0.00373
16	71481500	71496998	ENSG00000167377	ZNF23	breast_mammary_tissue	protein_coding	59	0.0793724	4.77818e-05	-0.568	0.00373
19	7745729	7747744	ENSG00000181029	TRAPPC5	thyroid	protein_coding	69	0.0137284	0.178253	-1.38	0.00373
1	243218163	243219696	ENSG00000253326	RP11-261C10.7	stomach	pseudogene	36	0.0861591	0.00105578	-2.32	0.00372
10	104674342	104675161	ENSG00000272912	RP11-724N1.1	adrenal_gland	lincRNA	63	0.0825133	0.000518699	0.734	0.00372
10	104629273	104661656	ENSG00000214435	AS3MT	artery_tibial	protein_coding	63	0.560797	7.47081e-60	-0.00706	0.00372
9	19230433	19374139	ENSG00000137145	DENND4C	skin_sun_exposed_lower_leg	protein_coding	30	0.0324038	0.00288796	1.02	0.00372
1	242158792	242162375	ENSG00000197769	MAP1LC3C	spleen	protein_coding	36	0.0649088	0.00194377	0.226	0.00371
1	243218163	243219696	ENSG00000253326	RP11-261C10.7	cells_transformed_fibroblasts	pseudogene	36	0.254994	3.6778e-17	-2.45	0.00371
10	105253736	105352309	ENSG00000107954	NEURL	prostate	protein_coding	63	-0.00887992	0.075867	0.944	0.00371
10	105156405	105206049	ENSG00000148843	PDCD11	adipose	protein_coding	63	0.017628	0.000936517	-0.754	0.00371
10	104613980	104624718	ENSG00000166275	C10orf32	colon_sigmoid	protein_coding	63	0.22319	2.08271e-11	0.368	0.00371
12	64845660	64895888	ENSG00000183735	TBK1	cells_transformed_fibroblasts	protein_coding	31	0.118139	3.64187e-09	-0.942	0.00371
5	112196885	112228776	ENSG00000153037	SRP19	blood	protein_coding	20	0.00299856	0.0287157	-0.552	0.00371
12	66741211	67197966	ENSG00000155974	GRIP1	thyroid	protein_coding	31	0.0317173	0.00767083	-1.24	0.0037
16	71879894	71919171	ENSG00000224470	ATXN1L	cells_transformed_fibroblasts	protein_coding	59	0.0121782	0.239112	1.17	0.0037
9	19230433	19374139	ENSG00000137145	DENND4C	artery_tibial	protein_coding	30	0.0454957	0.00111054	0.703	0.0037
9	20995306	21031635	ENSG00000188921	PTPLAD2	vagina	protein_coding	30	0.0550081	0.0053684	0.897	0.0037
10	104613980	104624718	ENSG00000166275	C10orf32	brain_cerebellum	protein_coding	63	0.241018	1.72727e-09	0.38	0.00369
3	169556967	169587718	ENSG00000114248	LRRC31	spleen	protein_coding	50	0.0232205	0.00069677	-2.91	0.00369
5	112312399	112356667	ENSG00000172795	DCP2	adipose_subcutaneous	protein_coding	20	0.225331	5.80079e-20	0.361	0.00369
9	19108373	19149288	ENSG00000147872	PLIN2	muscle_skeletal	protein_coding	30	0.0255738	0.000348067	0.00637	0.00368
1	243218163	243219696	ENSG00000253326	RP11-261C10.7	adipose_subcutaneous	pseudogene	36	0.217584	6.99424e-17	-2.07	0.00367
3	170779128	171178197	ENSG00000154310	TNIK	muscle_skeletal	protein_coding	50	0.0392386	0.054691	1.09	0.00367
5	111478138	111755013	ENSG00000129595	EPB41L4A	heart_left_ventricle	protein_coding	20	0.135611	5.20342e-07	-3.64	0.00367
9	19230762	19374137	ENSG00000137145	DENND4C	brain_dorsolateral_prefrontal_cortex	protein_coding	30	0.108858	3.68596e-13	0.169	0.00367
10	104629273	104661656	ENSG00000214435	AS3MT	brain_cerebellar_hemisphere	protein_coding	63	0.383441	6.93561e-12	-0.255	0.00366
15	68346517	68483096	ENSG00000033800	PIAS1	heart_atrial_appendage	protein_coding	30	0.0908926	4.95278e-05	-1.37	0.00366
3	169490619	169507504	ENSG00000085274	MYNN	brain_putamen_basal_ganglia	protein_coding	50	0.056531	0.0510992	-3.35	0.00366
3	170075466	170114623	ENSG00000136603	SKIL	muscle_skeletal	protein_coding	50	0.0450328	4.67814e-08	-0.733	0.00366
9	19049372	19051019	ENSG00000155876	RRAGA	heart_atrial_appendage	protein_coding	30	0.0431887	0.130149	-0.146	0.00366
10	104613980	104624718	ENSG00000166275	C10orf32	cells_ebv-transformed_lymphocytes	protein_coding	63	0.0957784	0.0353713	0.376	0.00365
19	8454865	8469318	ENSG00000185236	RAB11B	esophagus_muscularis	protein_coding	69	0.0115713	0.0185375	1.36	0.00365
1	243218163	243219696	ENSG00000253326	RP11-261C10.7	colon_sigmoid	pseudogene	36	0.0179124	0.00824556	-3.17	0.00364
10	104629273	104661656	ENSG00000214435	AS3MT	colon_sigmoid	protein_coding	63	0.496889	6.07775e-27	-0.087	0.00364
19	5691845	5720583	ENSG00000196365	LONP1	adipose_visceral_omentum	protein_coding	69	0.235528	5.73744e-12	1.48	0.00364
5	111478138	111755013	ENSG00000129595	EPB41L4A	artery_tibial	protein_coding	20	0.164838	1.45153e-15	-2.95	0.00364
10	105156405	105206049	ENSG00000148843	PDCD11	adipose_subcutaneous	protein_coding	63	0.198235	4.97117e-19	-0.624	0.00363
10	104674342	104675161	ENSG00000272912	RP11-724N1.1	adipose_subcutaneous	lincRNA	63	0.0222963	0.00262908	0.877	0.00363
10	105348285	105615301	ENSG00000107957	SH3PXD2A	skin_sun_exposed_lower_leg	protein_coding	63	0.0237515	0.124711	-0.593	0.00363
10	104935311	104935851	ENSG00000213277	MARCKSL1P1	heart_left_ventricle	pseudogene	63	-0.011719	0.0914563	0.557	0.00363
6	43639040	43655528	ENSG00000096080	MRPS18A	brain_anterior_cingulate_cortex_ba24	protein_coding	32	0.00335939	0.268723	-1.76	0.00363
10	104629273	104661656	ENSG00000214435	AS3MT	nerve_tibial	protein_coding	63	0.565304	5.97051e-56	0.0242	0.00362
15	68594050	68724501	ENSG00000137809	ITGA11	prostate	protein_coding	30	0.0897895	0.0435007	-1.53	0.00362
16	71671738	71758604	ENSG00000040199	PHLPP2	brain_cerebellum	protein_coding	59	0.161509	1.74809e-05	-1.41	0.00362
5	112212084	112258236	ENSG00000129625	REEP5	adipose	protein_coding	20	0.0112576	0.00677159	-0.735	0.00362
5	112212084	112258236	ENSG00000129625	REEP5	skin_sun_exposed_lower_leg	protein_coding	20	0.12811	4.62185e-08	1.37	0.00362
10	105642300	105677963	ENSG00000107960	OBFC1	brain_hippocampus	protein_coding	63	0.139571	0.00562069	-0.72	0.00361
10	104629273	104661656	ENSG00000214435	AS3MT	esophagus_gastroesophageal_junction	protein_coding	63	0.31347	2.28031e-20	-0.19	0.00361
12	66517697	66563765	ENSG00000155957	TMBIM4	thyroid	protein_coding	31	0.237556	2.68125e-16	-0.876	0.00361
16	72088522	72111145	ENSG00000261701	HPR	brain_cerebellum	protein_coding	59	0.48205	3.42539e-18	0.35	0.00361
3	170136653	170578169	ENSG00000013297	CLDN11	nerve_tibial	protein_coding	50	0.0717935	2.25424e-07	-0.806	0.00361
9	19230433	19374139	ENSG00000137145	DENND4C	lung	protein_coding	30	0.0734088	4.15413e-09	-0.0577	0.00361
9	20995306	21031635	ENSG00000188921	PTPLAD2	ovary	protein_coding	30	-0.0920684	0.17694	-0.825	0.00361
1	243218163	243219696	ENSG00000253326	RP11-261C10.7	brain_caudate_basal_ganglia	pseudogene	36	0.0952801	0.0170561	-1.31	0.0036
10	104613980	104624718	ENSG00000166275	C10orf32	nerve_tibial	protein_coding	63	0.344087	4.6363e-28	0.271	0.0036
10	104613980	104624718	ENSG00000166275	C10orf32	adipose_subcutaneous	protein_coding	63	0.358666	8.69449e-32	0.0548	0.0036
16	69497203	69497203	ENSG00000269746.1	AC009060.1	adipose_subcutaneous	protein_coding	59	0.0619695	0.000206058	1.32	0.0036
3	169940153	170023769	ENSG00000163558	PRKCI	liver	protein_coding	50	-0.0046532	0.187603	-1.17	0.0036
1	241660903	241683061	ENSG00000091483	FH	liver	protein_coding	36	0.365129	4.30279e-07	0.808	0.00359
10	104613980	104624718	ENSG00000166275	C10orf32	liver	protein_coding	63	0.112054	0.0151174	0.346	0.00359
16	71762913	71843104	ENSG00000166747	AP1G1	adrenal_gland	protein_coding	59	0.139472	0.000514254	1.83	0.00359
16	73484094	73484094	ENSG00000272250.1	RP11-346C20.4	adipose_visceral_omentum	lincRNA	59	0.0454786	0.00350549	3.04	0.00359
19	8130286	8214730	ENSG00000142449	FBN3	adipose_visceral_omentum	protein_coding	69	0.05958	6.30651e-06	1.96	0.00359
5	112312399	112356667	ENSG00000172795	DCP2	heart_atrial_appendage	protein_coding	20	0.0385756	0.0529984	0.934	0.00359
10	104629273	104661656	ENSG00000214435	AS3MT	artery_aorta	protein_coding	63	0.432009	3.77848e-30	-0.0693	0.00358
10	104613980	104624718	ENSG00000166275	C10orf32	brain_caudate_basal_ganglia	protein_coding	63	0.323675	6.87961e-12	0.333	0.00358
10	105889646	105992120	ENSG00000197748	WDR96	adipose_subcutaneous	protein_coding	63	0.0446605	0.000147126	0.92	0.00358
15	68570141	68588203	ENSG00000169018	FEM1B	adipose	protein_coding	30	0.0230872	0.000176416	-1.14	0.00358
5	443273	472052	ENSG00000180104	EXOC3	brain_frontal_cortex_ba9	protein_coding	36	0.208009	5.19913e-06	-1.4	0.00358
5	112849380	112930982	ENSG00000047188	YTHDC2	stomach	protein_coding	20	0.052276	0.000784119	0.494	0.00358
9	19408925	19452018	ENSG00000177076	ACER2	lung	protein_coding	30	0.0996965	4.09446e-06	-0.333	0.00358
14	36681960	36681960	ENSG00000259104.2	PTCSC3	lung	lincRNA	54	0.0684274	0.000796646	-9.47	0.00357
15	66187417	66546085	ENSG00000157890	MEGF11	nerve_tibial	protein_coding	30	0.066433	1.92824e-05	1.44	0.00357
16	70557691	70608820	ENSG00000189091	SF3B3	esophagus_muscularis	protein_coding	59	0.0229383	0.000618406	1.26	0.00357
18	1.56046e+06	1.56046e+06	ENSG00000132204.9	LINC00470	skin_not_sun_exposed_suprapubic	lincRNA	35	0.0164055	0.0180817	2.16	0.00357
19	22235254	22274282	ENSG00000197134	ZNF257	pancreas	protein_coding	77	0.265648	3.9119e-15	3.62	0.00357
9	19200333	19201044	ENSG00000232176	RP11-146N23.1	brain_nucleus_accumbens_basal_ganglia	pseudogene	30	0.0335602	0.0327028	0.682	0.00357
9	19049372	19051019	ENSG00000155876	RRAGA	skin_sun_exposed_lower_leg	protein_coding	30	0.0403912	0.00618466	0.865	0.00357
1	243218163	243219696	ENSG00000253326	RP11-261C10.7	whole_blood	pseudogene	36	0.0378611	0.00203146	0.259	0.00356
10	104629273	104661656	ENSG00000214435	AS3MT	esophagus_mucosa	protein_coding	63	0.385293	3.69242e-33	0.0385	0.00356
10	104613980	104624718	ENSG00000166275	C10orf32	esophagus_gastroesophageal_junction	protein_coding	63	0.238846	1.2134e-11	0.226	0.00356
10	104613980	104624718	ENSG00000166275	C10orf32	lung	protein_coding	63	0.262122	6.1033e-22	0.159	0.00356
10	104613980	104624718	ENSG00000166275	C10orf32	whole_blood	protein_coding	63	0.0999385	2.34991e-08	0.462	0.00356
10	104613980	104624718	ENSG00000166275	C10orf32	breast_mammary_tissue	protein_coding	63	0.219653	4.61291e-10	0.351	0.00356
10	105791044	105845760	ENSG00000065618	COL17A1	colon_transverse	protein_coding	63	-0.0244342	0.198687	-0.526	0.00356
10	104935311	104935851	ENSG00000213277	MARCKSL1P1	colon_transverse	pseudogene	63	0.0569598	0.000288028	0.589	0.00356
12	66696325	66737423	ENSG00000127311	HELB	artery_tibial	protein_coding	31	0.172693	1.1225e-10	-1.21	0.00356
19	22180450	22181642	ENSG00000271095	AC003973.6	esophagus_muscularis	pseudogene	77	0.0313949	0.000183829	1.96	0.00356
5	112357796	112824527	ENSG00000171444	MCC	skin_not_sun_exposed_suprapubic	protein_coding	20	0.101649	4.91092e-07	-1.23	0.00356
9	20341663	20622542	ENSG00000171843	MLLT3	nerve_tibial	protein_coding	30	0.00285591	0.279983	-1.05	0.00356
9	17579080	17797127	ENSG00000107295	SH3GL2	brain_spinal_cord_cervical_c-1	protein_coding	30	-0.0564815	0.245408	-0.333	0.00356
1	241753404	241840678	ENSG00000054277	OPN3	blood	protein_coding	36	0.00487596	0.00745312	-0.519	0.00355
10	104613980	104624718	ENSG00000166275	C10orf32	adipose_visceral_omentum	protein_coding	63	0.309578	3.27667e-20	0.265	0.00355
10	104613980	104624718	ENSG00000166275	C10orf32	stomach	protein_coding	63	0.196539	4.13155e-12	0.334	0.00355
10	104613980	104624718	ENSG00000166275	C10orf32	artery_tibial	protein_coding	63	0.365973	1.24314e-31	0.244	0.00355
19	22115760	22193751	ENSG00000160321	ZNF208	pancreas	protein_coding	77	0.11367	1.20261e-06	1.6	0.00355
9	19053141	19103117	ENSG00000147874	HAUS6	lung	protein_coding	30	0.014742	0.120727	-2.17	0.00355
12	66517697	66563765	ENSG00000155957	TMBIM4	adipose_visceral_omentum	protein_coding	31	0.132968	1.88255e-09	-0.914	0.00354
19	8387468	8408146	ENSG00000186994	KANK3	esophagus_mucosa	protein_coding	69	0.0402457	6.37486e-05	1.56	0.00354
3	172061009	172061009	ENSG00000183657.2	PP13439	skin_sun_exposed_lower_leg	protein_coding	50	0.106327	5.43348e-09	-1.03	0.00354
10	103605356	103815950	ENSG00000120029	C10orf76	esophagus_mucosa	protein_coding	63	0.0176649	0.0106111	-0.822	0.00353
10	104629273	104661656	ENSG00000214435	AS3MT	breast_mammary_tissue	protein_coding	63	0.404823	2.92556e-27	0.0657	0.00353
10	104474295	104503249	ENSG00000156398	SFXN2	lung	protein_coding	63	0.155202	3.68964e-13	-0.501	0.00353
10	103544200	103578696	ENSG00000198408	MGEA5	adipose_subcutaneous	protein_coding	63	0.000802056	0.133355	0.754	0.00353
5	112196919	112205485	ENSG00000153037	SRP19	pancreas	protein_coding	20	0.137171	1.49922e-07	-1.66	0.00353
10	104613980	104624718	ENSG00000166275	C10orf32	vagina	protein_coding	63	0.0357061	0.0546093	0.164	0.00352
10	104613980	104624718	ENSG00000166275	C10orf32	adrenal_gland	protein_coding	63	0.150705	9.1696e-09	0.327	0.00352
10	104629273	104661656	ENSG00000214435	AS3MT	heart_left_ventricle	protein_coding	63	0.0849401	0.000298376	0.285	0.00352
5	112212084	112258236	ENSG00000129625	REEP5	blood	protein_coding	20	0.0631071	7.54178e-20	-1.75	0.00352
15	66628544	66679084	ENSG00000075131	TIPIN	brain_nucleus_accumbens_basal_ganglia	protein_coding	30	0.274241	8.87073e-11	-2.54	0.00351
3	168621154	168639784	ENSG00000242268	RP11-368I23.2	brain_caudate_basal_ganglia	lincRNA	50	0.0359455	0.0462653	0.308	0.00351
1	243218163	243219696	ENSG00000253326	RP11-261C10.7	brain_anterior_cingulate_cortex_ba24	pseudogene	36	0.0287833	0.0041314	-0.772	0.0035
10	104629273	104661656	ENSG00000214435	AS3MT	esophagus_muscularis	protein_coding	63	0.44991	2.511e-34	0.0894	0.0035
16	73094369	73096215	ENSG00000271009	RP11-346C20.3	cells_transformed_fibroblasts	lincRNA	59	0.0635853	9.05908e-06	0.0908	0.0035
9	19926092	19929935	ENSG00000261402	RP11-378I6.1	brain_putamen_basal_ganglia	lincRNA	30	0.198652	3.75652e-08	0.376	0.0035
1	243419320	243663394	ENSG00000054282	SDCCAG8	brain_putamen_basal_ganglia	protein_coding	36	0.189403	3.05871e-05	3.13	0.00349
1	243218163	243219696	ENSG00000253326	RP11-261C10.7	lung	pseudogene	36	0.12536	1.08057e-12	-2.47	0.00349
10	104613980	104624718	ENSG00000166275	C10orf32	artery_coronary	protein_coding	63	0.185582	0.00125893	-0.223	0.00349
10	104221149	104236802	ENSG00000138111	TMEM180	spleen	protein_coding	63	0.342586	1.03662e-07	1.01	0.00349
10	104629273	104661656	ENSG00000214435	AS3MT	small_intestine_terminal_ileum	protein_coding	63	0.28893	1.63561e-08	0.256	0.00349
10	105889646	105992120	ENSG00000197748	WDR96	spleen	protein_coding	63	0.0150494	0.167434	1.01	0.00349
15	69110560	69239150	ENSG00000258484	SPESP1	heart_atrial_appendage	protein_coding	30	0.0182846	0.389592	-1.36	0.00349
9	18473892	18910948	ENSG00000178031	ADAMTSL1	artery_coronary	protein_coding	30	0.123171	0.00351941	1.26	0.00349
10	104629273	104661656	ENSG00000214435	AS3MT	vagina	protein_coding	63	0.300033	5.57628e-08	0.263	0.00348
10	104845940	104953056	ENSG00000076685	NT5C2	heart_left_ventricle	protein_coding	63	0.0247657	0.037463	0.952	0.00348
5	111478138	111755013	ENSG00000129595	EPB41L4A	prostate	protein_coding	20	0.0501841	0.000991533	-0.84	0.00348
1	240931554	241520530	ENSG00000182901	RGS7	brain_caudate_basal_ganglia	protein_coding	36	0.0746826	0.0390585	-0.971	0.00347
10	105253736	105352309	ENSG00000107954	NEURL	pancreas	protein_coding	63	0.0551336	0.0243519	0.549	0.00347
10	104629273	104661656	ENSG00000214435	AS3MT	adipose	protein_coding	63	0.284995	6.12286e-43	0.289	0.00347
10	104629273	104661656	ENSG00000214435	AS3MT	brain_amygdala	protein_coding	63	0.037278	0.000438236	0.215	0.00347
15	68560130	68570332	ENSG00000260657	RP11-315D16.4	brain_hippocampus	lincRNA	30	0.34809	8.86695e-08	0.954	0.00347
5	111929519	111929519	ENSG00000268358.1	EPB41L4A-AS2	brain_hypothalamus	protein_coding	20	0.0125329	0.125864	-0.213	0.00347
10	104935311	104935851	ENSG00000213277	MARCKSL1P1	heart_atrial_appendage	pseudogene	63	0.0358932	0.00221706	0.541	0.00346
10	104629273	104661656	ENSG00000214435	AS3MT	brain_hippocampus	protein_coding	63	0.2488	0.000770571	0.212	0.00346
5	111519379	111519379	ENSG00000268358.1	EPB41L4A-AS2	adrenal_gland	protein_coding	20	0.0268551	0.189979	-1.17	0.00346
9	20604401	20604401	ENSG00000227071.1	RP11-4E23.2	brain_hippocampus	lincRNA	30	0.0302114	0.161459	0.513	0.00346
10	104629273	104661656	ENSG00000214435	AS3MT	prostate	protein_coding	63	0.3641	2.39405e-07	-0.00813	0.00345
10	104935311	104935851	ENSG00000213277	MARCKSL1P1	muscle_skeletal	pseudogene	63	0.0419168	0.00910069	-0.692	0.00345
15	68560130	68570332	ENSG00000260657	RP11-315D16.4	skin_sun_exposed_lower_leg	lincRNA	30	0.142633	1.29672e-13	1.08	0.00345
3	170128300	170136403	ENSG00000242578	RP11-469J4.3	colon_sigmoid	lincRNA	50	0.0537055	0.00754024	0.965	0.00345
9	21329670	21335379	ENSG00000198642	KLHL9	brain_amygdala	protein_coding	30	0.0828927	0.042872	-1.13	0.00345
10	104935311	104935851	ENSG00000213277	MARCKSL1P1	esophagus_mucosa	pseudogene	63	0.0682587	0.000497495	0.516	0.00344
10	104935311	104935851	ENSG00000213277	MARCKSL1P1	cells_ebv-transformed_lymphocytes	pseudogene	63	0.105706	0.0188327	0.533	0.00344
10	104613980	104624718	ENSG00000166275	C10orf32	thyroid	protein_coding	63	0.391616	4.73314e-37	0.134	0.00344
10	104613980	104624718	ENSG00000166275	C10orf32	brain_frontal_cortex_ba9	protein_coding	63	0.259179	1.2501e-06	0.271	0.00344
10	104221149	104236802	ENSG00000138111	TMEM180	heart_left_ventricle	protein_coding	63	0.206809	4.93892e-12	0.929	0.00344
16	71879899	71962913	ENSG00000182149	IST1	artery_tibial	protein_coding	59	0.0253583	0.149403	-0.548	0.00344
3	169684423	169716161	ENSG00000008952	SEC62	skin_sun_exposed_lower_leg	protein_coding	50	0.0469574	8.89576e-06	1.42	0.00344
5	111478138	111755013	ENSG00000129595	EPB41L4A	esophagus_muscularis	protein_coding	20	0.196334	7.53038e-14	-2.35	0.00344
10	104629273	104661656	ENSG00000214435	AS3MT	thyroid	protein_coding	63	0.458142	8.90013e-44	-0.209	0.00343
10	104935311	104935851	ENSG00000213277	MARCKSL1P1	cells_transformed_fibroblasts	pseudogene	63	0.0824582	8.61679e-08	0.557	0.00343
10	104404253	104418164	ENSG00000171206	TRIM8	pancreas	protein_coding	63	0.12806	1.90616e-07	-0.547	0.00342
10	104613980	104624718	ENSG00000166275	C10orf32	skin_sun_exposed_lower_leg	protein_coding	63	0.271696	3.11469e-23	0.254	0.00342
10	104613980	104624718	ENSG00000166275	C10orf32	esophagus_muscularis	protein_coding	63	0.339871	4.68521e-26	0.286	0.00342
10	104845940	104953056	ENSG00000076685	NT5C2	adipose_subcutaneous	protein_coding	63	0.0788034	1.96789e-06	-0.845	0.00342
16	72088522	72111145	ENSG00000261701	HPR	esophagus_gastroesophageal_junction	protein_coding	59	0.0464923	3.63102e-05	2.28	0.00342
19	22235254	22274282	ENSG00000197134	ZNF257	prostate	protein_coding	77	0.0490733	5.66039e-07	4.88	0.00342
5	110831731	110848288	ENSG00000164211	STARD4	skin_sun_exposed_lower_leg	protein_coding	20	0.0149927	0.0397493	0.771	0.00342
6	44126548	44152139	ENSG00000137225	CAPN11	esophagus_gastroesophageal_junction	protein_coding	32	0.0781074	0.000289202	1.82	0.00342
1	242246288	242687998	ENSG00000180287	PLD5	brain_cerebellum	protein_coding	36	0.088164	0.00233748	-0.0127	0.00341
10	104935311	104935851	ENSG00000213277	MARCKSL1P1	lung	pseudogene	63	0.169423	3.9712e-14	0.529	0.00341
10	104613980	104624718	ENSG00000166275	C10orf32	spleen	protein_coding	63	0.0771329	0.00035636	-0.0292	0.00341
12	66582659	66648402	ENSG00000090376	IRAK3	pituitary	protein_coding	31	0.0388959	0.0168533	0.106	0.00341
15	68560130	68570332	ENSG00000260657	RP11-315D16.4	adipose_visceral_omentum	lincRNA	30	0.310014	2.09424e-23	0.972	0.00341
1	243218163	243219696	ENSG00000253326	RP11-261C10.7	esophagus_muscularis	pseudogene	36	0.128858	7.6473e-07	-2.43	0.0034
1	243218163	243219696	ENSG00000253326	RP11-261C10.7	esophagus_mucosa	pseudogene	36	0.0450266	0.000143953	-2.2	0.0034
10	104613980	104624718	ENSG00000166275	C10orf32	brain_spinal_cord_cervical_c-1	protein_coding	63	0.185321	0.0126003	0.546	0.0034
10	104605352	104605707	ENSG00000236937	PTGES3P4	pituitary	pseudogene	63	0.078589	0.0254936	-0.632	0.0034
10	104674342	104675161	ENSG00000272912	RP11-724N1.1	brain_cerebellum	lincRNA	63	0.21665	2.10378e-08	-0.0971	0.0034
10	104629273	104661656	ENSG00000214435	AS3MT	minor_salivary_gland	protein_coding	63	0.0822463	0.00139593	0.203	0.0034
16	72088522	72111145	ENSG00000261701	HPR	brain_nucleus_accumbens_basal_ganglia	protein_coding	59	0.533464	2.59808e-19	0.793	0.0034
19	7828035	7834491	ENSG00000104938	CLEC4M	adipose_visceral_omentum	protein_coding	69	0.0630485	3.07554e-05	-1.68	0.0034
19	21892324	21892993	ENSG00000268535	RP11-420K14.3	nerve_tibial	pseudogene	77	0.12347	4.09627e-11	-2.53	0.0034
9	20995306	21031635	ENSG00000188921	PTPLAD2	cells_transformed_fibroblasts	protein_coding	30	0.0819044	3.23297e-05	-0.825	0.0034
1	243218163	243219696	ENSG00000253326	RP11-261C10.7	nerve_tibial	pseudogene	36	0.0189179	0.000113132	-1.61	0.00339
1	243218163	243219696	ENSG00000253326	RP11-261C10.7	skin_sun_exposed_lower_leg	pseudogene	36	0.241174	2.1485e-22	-1.7	0.00339
10	104935311	104935851	ENSG00000213277	MARCKSL1P1	artery_aorta	pseudogene	63	0.0562111	0.00752861	-0.158	0.00339
10	104935311	104935851	ENSG00000213277	MARCKSL1P1	thyroid	pseudogene	63	0.0673905	6.59476e-06	0.512	0.00339
10	104613980	104624718	ENSG00000166275	C10orf32	brain_anterior_cingulate_cortex_ba24	protein_coding	63	0.150387	2.71029e-05	0.229	0.00339
10	105036920	105050108	ENSG00000148798	INA	colon_transverse	protein_coding	63	0.00577387	0.1651	0.161	0.00339
10	104629273	104661656	ENSG00000214435	AS3MT	whole_blood	protein_coding	63	0.143969	1.79285e-14	-0.121	0.00339
16	7.2565e+07	7.2565e+07	ENSG00000197445.2	C16orf47	breast_mammary_tissue	protein_coding	59	0.00856452	0.0519055	1.05	0.00339
10	104613980	104624718	ENSG00000166275	C10orf32	brain_putamen_basal_ganglia	protein_coding	63	0.0545605	0.0137595	0.288	0.00338
10	104629273	104661656	ENSG00000214435	AS3MT	colon_transverse	protein_coding	63	0.223871	6.61361e-10	0.0943	0.00338
10	104935311	104935851	ENSG00000213277	MARCKSL1P1	esophagus_muscularis	pseudogene	63	0.10612	1.27698e-07	0.534	0.00338
10	104629273	104661656	ENSG00000214435	AS3MT	skin_not_sun_exposed_suprapubic	protein_coding	63	0.411275	2.36272e-32	0.0742	0.00338
10	104179558	104182893	ENSG00000107872	FBXL15	blood	protein_coding	63	0.0063852	0.00277191	-0.542	0.00338
10	105642300	105677963	ENSG00000107960	OBFC1	muscle_skeletal	protein_coding	63	0.0879175	2.22128e-09	0.971	0.00338
12	65563351	65642107	ENSG00000174106	LEMD3	muscle_skeletal	protein_coding	31	0.127594	9.97089e-15	0.949	0.00338
12	65987513	65987513	ENSG00000256268.1	RP11-221N13.3	cells_transformed_fibroblasts	lincRNA	31	0.0622842	3.04524e-05	-0.869	0.00338
16	72088522	72111145	ENSG00000261701	HPR	brain_amygdala	protein_coding	59	0.437785	1.00419e-10	0.594	0.00338
5	111478138	111755013	ENSG00000129595	EPB41L4A	ovary	protein_coding	20	0.114433	0.038294	-2.58	0.00338
9	20658308	20995954	ENSG00000188352	FOCAD	artery_tibial	protein_coding	30	0.0696443	1.26214e-05	-0.792	0.00338
10	104629209	104661655	ENSG00000214435	AS3MT	brain_dorsolateral_prefrontal_cortex	protein_coding	63	0.151989	4.46464e-18	0.0547	0.00337
10	104629273	104661656	ENSG00000214435	AS3MT	cells_transformed_fibroblasts	protein_coding	63	0.557413	6.35376e-42	-0.0707	0.00337
12	65444406	65515346	ENSG00000156076	WIF1	lung	protein_coding	31	0.0540878	0.00345147	-0.988	0.00337
19	22235254	22274282	ENSG00000197134	ZNF257	skin_not_sun_exposed_suprapubic	protein_coding	77	0.245446	1.11258e-16	4.89	0.00337
19	21933549	21936240	ENSG00000269845	RP11-420K14.6	skin_sun_exposed_lower_leg	pseudogene	77	0.116566	1.57024e-11	-2.1	0.00337
9	19049372	19051019	ENSG00000155876	RRAGA	adipose_subcutaneous	protein_coding	30	0.0754474	2.22365e-05	0.636	0.00337
1	243419320	243663394	ENSG00000054282	SDCCAG8	esophagus_gastroesophageal_junction	protein_coding	36	0.113137	2.019e-05	2.83	0.00336
10	105348285	105615301	ENSG00000107957	SH3PXD2A	cells_transformed_fibroblasts	protein_coding	63	0.0967882	1.7601e-07	-0.807	0.00336
10	104674342	104675161	ENSG00000272912	RP11-724N1.1	heart_atrial_appendage	lincRNA	63	0.0582474	0.00611134	0.46	0.00336
16	71671738	71758604	ENSG00000040199	PHLPP2	brain_spinal_cord_cervical_c-1	protein_coding	59	0.00778276	0.185629	-1.02	0.00336
5	110831731	110848288	ENSG00000164211	STARD4	liver	protein_coding	20	0.0359038	0.260181	2.2	0.00336
5	112212084	112258236	ENSG00000129625	REEP5	pancreas	protein_coding	20	-0.0127878	0.113467	-0.583	0.00336
10	104238986	104262482	ENSG00000138107	ACTR1A	brain_putamen_basal_ganglia	protein_coding	63	0.238708	6.4094e-05	-0.104	0.00335
10	104433488	104474164	ENSG00000138175	ARL3	brain_cerebellum	protein_coding	63	0.0834487	3.49981e-05	-0.684	0.00335
10	104629273	104661656	ENSG00000214435	AS3MT	artery_coronary	protein_coding	63	0.255926	6.97709e-08	0.119	0.00335
15	68346517	68483096	ENSG00000033800	PIAS1	muscle_skeletal	protein_coding	30	0.0330078	0.00618091	-1.16	0.00335
8	31496902	32622548	ENSG00000157168	NRG1	lung	protein_coding	10	0.0255394	0.0112502	0.233	0.00335
10	104629273	104661656	ENSG00000214435	AS3MT	uterus	protein_coding	63	0.127616	0.00290936	0.0932	0.00334
10	103370423	103455052	ENSG00000107829	FBXW4	prostate	protein_coding	63	0.00703913	0.0108056	-0.0849	0.00334
10	104629273	104661656	ENSG00000214435	AS3MT	pituitary	protein_coding	63	0.242413	8.55556e-12	-0.0803	0.00334
12	65563351	65642107	ENSG00000174106	LEMD3	colon_sigmoid	protein_coding	31	0.0678888	0.000408204	0.608	0.00334
5	110831731	110848288	ENSG00000164211	STARD4	brain_substantia_nigra	protein_coding	20	-0.101468	0.11179	-1.59	0.00334
1	243218163	243219696	ENSG00000253326	RP11-261C10.7	adrenal_gland	pseudogene	36	0.265138	9.43687e-10	-1.28	0.00333
10	104674342	104675161	ENSG00000272912	RP11-724N1.1	esophagus_muscularis	lincRNA	63	0.00929361	0.192258	0.701	0.00333
10	104209594	104211300	ENSG00000120055	C10orf95	artery_coronary	protein_coding	63	0.0122984	0.296338	-0.584	0.00333
10	104845940	104953056	ENSG00000076685	NT5C2	esophagus_muscularis	protein_coding	63	0.00985603	0.250059	0.64	0.00333
10	104845940	104953056	ENSG00000076685	NT5C2	testis	protein_coding	63	0.134978	9.3118e-06	0.529	0.00333
12	65563351	65642107	ENSG00000174106	LEMD3	vagina	protein_coding	31	0.0506367	0.159827	0.554	0.00333
5	112357796	112824527	ENSG00000171444	MCC	breast_mammary_tissue	protein_coding	20	0.0786718	3.91843e-05	-0.454	0.00333
10	104678050	104849978	ENSG00000148842	CNNM2	brain_putamen_basal_ganglia	protein_coding	63	0.0704776	0.0241224	0.593	0.00332
10	104613966	104624718	C10orf32	C10orf32	brain_dorsolateral_prefrontal_cortex	NA	63	0.541235	2.22877e-78	0.31	0.00332
10	104613980	104624718	ENSG00000166275	C10orf32	skin_not_sun_exposed_suprapubic	protein_coding	63	0.284864	1.06163e-19	0.0786	0.00332
12	66151800	66220754	ENSG00000241749	RPSAP52	esophagus_muscularis	pseudogene	31	0.00679514	0.171622	-0.741	0.00332
5	271736	353971	ENSG00000249915	PDCD6	artery_aorta	protein_coding	36	0.113819	2.23096e-06	-2.62	0.00332
9	17579080	17797127	ENSG00000107295	SH3GL2	minor_salivary_gland	protein_coding	30	0.200297	0.01496	-0.686	0.00332
9	21394887	21396345	ENSG00000261696	RP11-354P17.15	skin_sun_exposed_lower_leg	lincRNA	30	0.0234399	0.0578423	0.467	0.00332
1	242220387	242223544	ENSG00000224625	TUBB8P6	adipose_subcutaneous	pseudogene	36	0.0123386	0.0430479	0.748	0.00331
[truncated: 4,912 more rows]
