# Supplementary material for: Large-scale association analysis identified novel differentiated thyroid carcinoma risk loci by integrating transcriptome and proteome
Source: Research Square preprint supplement (doi:10.21203/rs.3.rs-6751995/v1), 2025-07-18
Supplement: Supplementary file 10 [file e038c1fb813aa0cfb05a58e3.xlsx]

## Sheet: Contents
	Contents
	Supplementary Table 1	Genome-wide association study analysis result that are identified across all studies
	Supplementary Table 2	Transcriptome-wide association study results using thyroid-relevant tissues from GTEx including thyroid, whole blood, pituatary, and brain hypothalamus
	Supplementary Table 3	Result of Baysian colocalization analysis of transcriptome (eQTLs) with differentiated thyroid carcinoma (DTC)
	Supplementary Table 4	FOCUS fine mapping analysis results of DTC identified genes across 49 tissues
	Supplementary Table 5	Results of transcriptome-wide association study (TWAS) using all 49 available tissues from GTEx
	Supplementary Table 6	Results of transcriptome-wide association study (TWAS) using thyroid cancer tissue from TCGA databse
	Supplementary Table 7	Results of brain and plasma blood proteome-wide association study (PWAS) using ROSMAP and AIRC study
	Supplementary Table 8	Result of Baysian colocalization analysis of proteome (pQTL) with differentiated thyroid carcinoma (DTC)
	Supplementary Table 9	Gene Set Enrichment Analysis of pathways and biological processes associated with identified genes from GWAS, TWAS and PWAS
	Supplementary Table 10	Effect estimates used in the PRS model in the study group EPIC and EPITYHR
	Supplementary Table 11	Comparison of MR casual estimates between MVMR and IVW (different clumping thresholds)

## Sheet: S2
Supplementary Table 2. Transcriptome-wide association study results using thyroid-relevant tissues from GTEx including thyroid, whole blood, pituatary, and brain hypothalamus
R2: A cross-validated R2 of tissue model's correlation to gene's measured transcriptome (prediction performance)
Gene	chromosome	start_position	end_position	R2	TWAS.Z	TWAS.P	Tissue
NRG1	8	31639222	32855666	0.4949	13.4843	1.93607e-41	Thyroid
TGFB2	1	218345336	218444619	0.144928	-11.2455	2.4372e-29	Thyroid
PTCSC2	9	97699625	97853080	0.127828	-10.5255	6.58997e-26	Thyroid
TRMO	9	97904489	97922500	0.290841	-9.87056	5.58522e-23	Brain_Hypothalamus
PTCSC3	14	36130677	36217284	0.143401	9.79461	1.18759e-22	Thyroid
SMAD3	15	67063763	67195173	0.214603	-9.53876	1.4455e-21	Thyroid
STN1	10	103856806	103918332	0.017295	-7.83879	4.54901e-15	Pituitary
AAGAB	15	67200667	67255195	0.0189402	-7.65404	1.94764e-14	Whole_Blood
ACTRT3	3	169766921	169769561	0.0338865	7.06847	1.56652e-12	Pituitary
TRIM14	9	98069275	98119222	0.0868086	6.77942	1.20656e-11	Thyroid
SDCCAG8	1	243256034	243500091	0.129055	6.52427	6.83328e-11	Thyroid
LRRC34	3	169793003	169812986	0.16017	6.4365	1.22258e-10	Thyroid
CEP170	1	243124428	243255348	0.0847448	5.91138	3.39248e-09	Whole_Blood
SAMD4A	14	54566117	54793315	0.0635815	5.89485	3.75013e-09	Thyroid
TMOD1	9	97501180	97601743	0.0150749	-5.82334	5.76826e-09	Thyroid
RAD51-AS1	15	40686183	40695107	0.0369917	-5.80992	6.25017e-09	Thyroid
SAXO1	9	18858906	19049358	0.0421775	-5.75924	8.44955e-09	Pituitary
LRRIQ4	3	169812870	169837773	0.0394221	-5.71923	1.0701e-08	Pituitary
CHST14	15	40470984	40473158	0.0214886	-5.69128	1.26088e-08	Thyroid
MAFTRR	16	79715220	79770651	0.427096	-5.66802	1.44458e-08	Brain_Hypothalamus
ZNF257	19	22052430	22091480	0.172637	5.51993	3.39137e-08	Whole_Blood
CCDC32	15	40528683	40565054	0.338388	5.37334	7.72909e-08	Thyroid
HAUS6	9	19053141	19102904	0.0677971	-5.13342	2.8453e-07	Thyroid
RMDN3	15	40735884	40755851	0.0229712	5.12636	2.954e-07	Brain_Hypothalamus
MECOM	3	169083499	169663775	0.0543355	5.02446	5.04857e-07	Thyroid
HEMGN	9	97926791	97944856	0.0209108	4.82586	1.39398e-06	Thyroid
CORO2A	9	98120975	98192637	0.167616	4.75962	1.93956e-06	Thyroid
MPHOSPH6	16	82147798	82170224	0.286586	4.73859	2.15207e-06	Pituitary
ANP32B	9	97983341	98015943	0.0251147	4.70563	2.5308e-06	Whole_Blood
PML	15	73994673	74047827	0.0219447	-4.59201	4.39e-06	Pituitary
SGK1	6	134169248	134318112	0.0694943	-4.50421	6.6619e-06	Thyroid
DLG5	10	77790791	77926755	0.26768	4.41889	9.92082e-06	Whole_Blood
MEX3C	18	51174550	51218333	0.0913894	-4.41838	9.94436e-06	Thyroid
MFSD14C	9	96949555	97013366	0.0638124	-4.41217	1.0234e-05	Brain_Hypothalamus
FZD3	8	28494205	28574267	0.389783	-4.39235	1.12132e-05	Thyroid
BMF	15	40087890	40108892	0.010168	-4.37871	1.19382e-05	Whole_Blood
KBTBD7	13	41189834	41194569	0.0599339	-4.36764	1.25599e-05	Whole_Blood
TGFB2-AS1	1	218344190	218346036	0.0488162	-4.35737	1.31634e-05	Thyroid
PLCL1	2	197804593	198572581	0.066786	4.31672	1.58364e-05	Thyroid
TIPARP-AS1	3	156671859	156674446	0.254587	-4.31372	1.60528e-05	Thyroid
NEFH	22	29480218	29491390	0.0557624	-4.30663	1.65761e-05	Whole_Blood
ERI1	8	9002147	9116746	0.0646853	-4.26616	1.98865e-05	Thyroid
CCNT2-AS1	2	134735464	134918712	0.0147041	4.22523	2.38692e-05	Whole_Blood
YY1AP1	1	155659443	155689000	0.0285118	4.21738	2.47159e-05	Thyroid
SLC7A2	8	17497088	17570573	0.354075	4.2038	2.62471e-05	Thyroid
CTSZ	20	58985686	59008238	0.0451776	-4.12813	3.65731e-05	Whole_Blood
VAV3	1	107571161	107965180	0.352757	-4.11211	3.92053e-05	Thyroid
RFTN2	2	197568224	197676045	0.0873964	4.1106	3.94639e-05	Pituitary
POT1-AS1	7	124929873	125482966	0.0712023	-4.10393	4.06188e-05	Thyroid
SLC11A1	2	218382029	218396894	0.0497434	4.09675	4.19e-05	Brain_Hypothalamus
IGFBP5	2	216672105	216695549	0.0241041	-4.09401	4.23984e-05	Thyroid
C16orf86	16	67666814	67668757	0.0627554	-4.03617	5.43308e-05	Whole_Blood
PRAG1	8	8317736	8386439	0.508391	-4.02549	5.68561e-05	Thyroid
SF3B1	2	197388515	197435079	0.119021	4.00603	6.17466e-05	Thyroid
ZNF723	19	22832291	22858667	0.0322127	3.99701	6.41472e-05	Thyroid
ACKR2	3	42804752	42887974	0.0338372	-3.98096	6.86361e-05	Brain_Hypothalamus
RPS6KL1	14	74903951	74923302	0.0587778	3.97848	6.93578e-05	Whole_Blood
RAPGEF6	5	131423921	131635231	0.0463464	3.97418	7.06207e-05	Whole_Blood
MYNN	3	169773396	169789716	0.0113801	-3.95727	7.58108e-05	Whole_Blood
TBC1D23	3	100260992	100325251	0.0124339	3.95157	7.76414e-05	Whole_Blood
ACD	16	67657512	67660810	0.0117318	-3.92032	8.84307e-05	Thyroid
SGMS1-AS1	10	50623466	50641451	0.0298225	3.91611	8.99909e-05	Whole_Blood
SLC34A2	4	25648011	25678748	0.0220445	3.89807	9.69626e-05	Thyroid
MLLT3	9	20341669	20622499	0.0692876	3.89428	9.84914e-05	Thyroid
C1orf43	1	154206696	154220637	0.0186055	3.87704	0.000105734	Thyroid
PPP2R3C	14	35085467	35122517	0.439225	3.87399	0.000107068	Whole_Blood
BBC3	19	47220822	47232766	0.0276752	-3.87322	0.000107405	Thyroid
TCF20	22	42160013	42343616	0.0367833	-3.87251	0.000107722	Brain_Hypothalamus
FUT9	6	96015974	96215612	0.0727023	3.83126	0.000127487	Pituitary
VAV3-AS1	1	107964443	107994607	0.0948657	-3.82251	0.000132098	Thyroid
ZDHHC1	16	67394152	67416833	0.132603	3.79036	0.000150429	Thyroid
SMIM29	6	34246381	34249108	0.0116493	-3.78726	0.000152315	Thyroid
IFI27L1	14	94081301	94103846	0.130715	3.7839	0.000154389	Brain_Hypothalamus
SLC35G5	8	11331012	11332360	0.121502	-3.77412	0.000160575	Pituitary
CCDC13-AS1	3	42732575	42746768	0.0521753	3.75131	0.000175913	Brain_Hypothalamus
SLC25A12	2	171783405	171999859	0.132103	3.71734	0.000201333	Brain_Hypothalamus
TRIB1	8	125430358	125438403	0.0426678	-3.70455	0.000211766	Thyroid
TTC23	15	99136323	99251223	0.35477	-3.70448	0.000211824	Brain_Hypothalamus
SLC25A15	13	40789412	40812460	0.0228598	3.6921	0.000222414	Pituitary
PCBP3	21	45643694	45942454	0.102852	3.67267	0.000240034	Whole_Blood
MSH2	2	47403067	47663146	0.206412	3.66934	0.000243174	Whole_Blood
INSR	19	7112255	7294414	0.0359885	3.66638	0.000246011	Thyroid
BSCL2	11	62689289	62709845	0.184365	3.65986	0.000252356	Whole_Blood
RBM19	12	113816738	113966325	0.528444	-3.65207	0.000260135	Thyroid
SLC22A5	5	132369710	132395613	0.223733	3.64149	0.000271069	Whole_Blood
CWF19L1	10	100232298	100267680	0.410216	-3.64131	0.000271253	Pituitary
BTRC	10	101354033	101557321	0.058586	3.62824	0.000285364	Thyroid
DCTN5	16	23641466	23677472	0.0340604	3.62703	0.000286701	Brain_Hypothalamus
CRLF3	17	30769388	30824692	0.156879	-3.62699	0.000286746	Thyroid
METAP1D	2	171999943	172082430	0.0483488	-3.61532	0.000299971	Pituitary
EIF2AK4	15	39934115	40035591	0.175978	3.60895	0.000307443	Pituitary
TRPC4AP	20	35002404	35092807	0.194659	-3.60442	0.000312846	Whole_Blood
FAM171A2	17	44353215	44363853	0.0278752	3.59597	0.000323191	Thyroid
MAMSTR	19	48712725	48719725	0.0266266	3.58872	0.000332311	Thyroid
PEF1	1	31629866	31644896	0.0361008	3.58774	0.000333563	Whole_Blood
FAM167A-AS1	8	11368402	11438658	0.101435	-3.58247	0.000340363	Brain_Hypothalamus
RASIP1	19	48720585	48740610	0.021733	3.56908	0.000358233	Thyroid
ADAMTS18	16	77247813	77435034	0.329142	3.54827	0.00038777	Brain_Hypothalamus
SLC66A1	1	19312326	19329300	0.166714	3.54738	0.000389082	Whole_Blood
WDR86-AS1	7	151409161	151413354	0.0265561	3.54023	0.000399777	Pituitary
PRDM11	11	45095806	45235110	0.302922	3.5388	0.000401956	Thyroid
HAP1	17	41717742	41734644	0.330453	-3.51323	0.000442692	Thyroid
NFKBIE	6	44258166	44265788	0.0102701	3.50459	0.000457304	Thyroid
GPR135	14	59429022	59465380	0.0536179	3.5029	0.000460229	Pituitary
FBXO16	8	28348287	28490278	0.230651	-3.50163	0.000462414	Thyroid
MEIKIN	5	131806990	131945698	0.18511	3.50145	0.000462729	Whole_Blood
PICK1	22	38056311	38075701	0.218528	-3.49946	0.000466202	Brain_Hypothalamus
HOMER3-AS1	19	18940235	18947452	0.136082	3.49545	0.000473268	Brain_Hypothalamus
RNU6ATAC35P	1	220825620	220826063	0.0892383	3.49255	0.000478433	Brain_Hypothalamus
RANBP10	16	67723070	67806560	0.0950285	-3.48056	0.000500363	Pituitary
INPPL1	11	72223701	72239147	0.0174115	-3.47656	0.000507884	Whole_Blood
NUMBL	19	40665905	40690972	0.037243	-3.47179	0.000517	Pituitary
LINC02036	3	194202392	194250203	0.0284968	-3.46209	0.000536	Thyroid
PDCD11	10	103396626	103446294	0.110625	-3.4531	0.000554187	Pituitary
CREB3L4	1	153967534	153974361	0.0377359	3.45272	0.000554958	Brain_Hypothalamus
SEC31B	10	100486646	100519864	0.379978	3.45123	0.000558033	Thyroid
NPRL3	16	84271	138677	0.0976219	-3.44706	0.000566732	Whole_Blood
PNP	14	20461992	20477094	0.0999434	3.44321	0.000574842	Pituitary
ZNF626	19	20619939	20661596	0.176353	3.44303	0.000575228	Thyroid
MMP2-AS1	16	55426797	55462297	0.472864	3.4192	0.000628047	Whole_Blood
NDEL1	17	8413131	8490411	0.0419571	-3.41883	0.000628914	Thyroid
FNIP1	5	131641714	131797017	0.0145584	3.41855	0.000629554	Whole_Blood
ZSWIM6	5	61332258	61546172	0.0357469	3.4157	0.000636181	Thyroid
PLD1	3	171600404	171810950	0.0534609	-3.40273	0.000667158	Whole_Blood
ANTKMT	16	720581	722590	0.0204962	3.39316	0.000690901	Whole_Blood
ACAT1	11	108116695	108147603	0.0716109	3.38696	0.000706717	Brain_Hypothalamus
ZNF676	19	22179089	22215801	0.248147	3.3838	0.000714908	Thyroid
CTCF	16	67562467	67639177	0.0741689	3.38279	0.000717539	Brain_Hypothalamus
NPAT	11	108157215	108222638	0.0836944	3.38168	0.000720451	Thyroid
ATM	11	108222823	108369102	0.129975	-3.37574	0.000736165	Whole_Blood
LRRC28	15	99251362	99390729	0.306747	-3.37182	0.000746745	Pituitary
TCN2	22	30607003	30627271	0.212713	3.36503	0.000765341	Pituitary
SLC1A3	5	36596588	36688334	0.176489	3.36272	0.000771798	Thyroid
SYT13	11	45240302	45286341	0.493023	3.35907	0.000782041	Thyroid
SLC51B	15	65045387	65053397	0.0916633	-3.35002	0.000808046	Brain_Hypothalamus
DUSP5	10	110497907	110511533	0.0815384	-3.34969	0.000809026	Brain_Hypothalamus
LINC02798	1	121396754	121463508	0.0506978	-3.34849	0.000812528	Pituitary
CACNA1C-AS1	12	2676001	2691200	0.0282141	3.34699	0.000816927	Whole_Blood
NTN5	19	48661407	48673081	0.150845	3.34205	0.000831617	Brain_Hypothalamus
LINC01725	1	83575776	83861053	0.11403	-3.34109	0.00083451	Thyroid
B3GAT1	11	134378504	134412242	0.0995214	-3.3399	0.000838071	Whole_Blood
PRSS23	11	86791059	86952910	0.15787	-3.3383	0.000842922	Thyroid
TRIM24	7	138460259	138589996	0.0369381	-3.3383	0.000842936	Whole_Blood
TOMM20	1	235109341	235128837	0.0112917	3.33701	0.00084686	Thyroid
STX4	16	31032889	31042975	0.0119512	-3.33328	0.000858275	Whole_Blood
ZFP91	11	58579063	58621550	0.0103392	3.33003	0.000868366	Thyroid
ZNF804A	2	184598529	184939492	0.0369866	3.32046	0.000898678	Thyroid
TMEM218	11	125094389	125111763	0.0327584	-3.31773	0.000907522	Whole_Blood
NUAK1	12	106063345	106138954	0.0151584	-3.31544	0.000914984	Thyroid
CARD19	9	93096217	93113283	0.106552	-3.31227	0.00092541	Whole_Blood
TSKU	11	76782251	76798153	0.0741588	3.28214	0.00103021	Pituitary
CHEK2	22	28687743	28742422	0.0180436	-3.2803	0.00103698	Thyroid
SLC16A8	22	38078134	38084184	0.0535255	-3.27585	0.00105343	Brain_Hypothalamus
OMG	17	31272013	31297539	0.0362212	-3.27306	0.00106391	Pituitary
ZSCAN10	16	3088890	3099295	0.0794522	3.2711	0.0010713	Pituitary
HLA-DPA1	6	33064569	33080775	0.124936	3.26798	0.00108319	Thyroid
TMEM184B	22	38219291	38273010	0.0842016	-3.26697	0.00108706	Whole_Blood
INCENP	11	62123998	62153169	0.134522	-3.26487	0.00109515	Pituitary
NF1	17	31094927	31382116	0.0195038	3.25785	0.0011226	Whole_Blood
GGPS1	1	235327350	235344532	0.117643	3.25698	0.00112604	Brain_Hypothalamus
POLR2A	17	7484366	7514616	0.0187401	3.25689	0.0011264	Whole_Blood
LINC01606	8	57142659	57244793	0.18257	-3.25302	0.00114185	Pituitary
POU2F3	11	120236640	120319945	0.0348025	-3.24773	0.00116329	Pituitary
BLOC1S2	10	100273280	100286680	0.0852507	-3.24689	0.00116672	Whole_Blood
LRRC36	16	67326798	67385204	0.154211	3.23823	0.00120272	Thyroid
HHATL	3	42692663	42702824	0.0980483	-3.23786	0.00120429	Thyroid
SMC6	2	17663812	17800242	0.263072	-3.23595	0.00121239	Thyroid
KCNG4	16	84218657	84240012	0.130102	-3.2326	0.00122669	Brain_Hypothalamus
IDH2-DT	15	90102649	90138016	0.144002	3.23147	0.00123153	Brain_Hypothalamus
SLC25A35	17	8287763	8295400	0.033159	3.22676	0.00125201	Whole_Blood
ATXN10	22	45671798	45845307	0.137019	3.21912	0.00128585	Whole_Blood
CDCA7L	7	21900899	21945903	0.41815	3.21724	0.00129428	Whole_Blood
ZNF148	3	125225669	125375325	0.0974098	3.21707	0.00129506	Pituitary
SLC2A9	4	9771153	10054936	0.079708	-3.21197	0.0013183	Brain_Hypothalamus
HIF1AN	10	100529072	100559998	0.286967	3.20876	0.00133311	Whole_Blood
TMEM163	2	134455759	134719000	0.0323033	3.20778	0.00133764	Brain_Hypothalamus
DPP7	9	137110542	137118309	0.0818129	3.20741	0.00133934	Pituitary
GNAI3	1	109548615	109600195	0.0177684	3.20176	0.00136592	Pituitary
PMEPA1	20	57648392	57711536	0.015633	3.20004	0.0013741	Thyroid
ZNRD2	11	65570460	65573942	0.0404171	3.19797	0.00138399	Pituitary
TMEM241	18	23197144	23437961	0.0414625	-3.19695	0.00138888	Whole_Blood
ELP5	17	7251416	7259940	0.136661	-3.1959	0.00139396	Whole_Blood
STON1	2	48529383	48598513	0.0959096	-3.19564	0.00139522	Whole_Blood
VAMP2	17	8159149	8163546	0.0350626	3.1949	0.0013988	Thyroid
ACSM5	16	20409534	20441336	0.331688	-3.19352	0.00140549	Thyroid
PTGDR2	11	60850933	60855950	0.0263786	3.19345	0.00140586	Thyroid
NUDCD2	5	163446526	163460102	0.0501913	3.18907	0.00142732	Pituitary
ATP6V0D1	16	67438014	67481181	0.121013	-3.18613	0.0014419	Whole_Blood
ZBED4	22	49853844	49890080	0.0268585	3.18587	0.00144318	Brain_Hypothalamus
TRABD2B	1	47760528	47997385	0.0738212	-3.17341	0.0015066	Thyroid
ZFYVE19	15	40807086	40815084	0.395047	-3.17283	0.00150962	Thyroid
FGF1	5	142592178	142698070	0.0163774	-3.17236	0.00151208	Thyroid
MBD6	12	57520710	57530148	0.0193747	3.17199	0.00151399	Thyroid
P4HA2	5	132190147	132295315	0.379993	-3.16981	0.00152539	Thyroid
PFAS	17	8247618	8270491	0.0414392	-3.16917	0.00152873	Pituitary
KLC4	6	43040777	43075095	0.0567195	-3.16704	0.00153998	Pituitary
MIA	19	40771648	40777490	0.117963	-3.16623	0.00154426	Pituitary
UQCR10	22	29767369	29770413	0.0338178	3.16161	0.00156899	Whole_Blood
CRELD2	22	49918167	49927540	0.188568	-3.15947	0.00158057	Whole_Blood
MPZL3	11	118226690	118252365	0.208737	3.15858	0.00158538	Pituitary
CDK5RAP3	17	47967810	47981781	0.159692	3.15369	0.00161219	Whole_Blood
DENND3	8	141117278	141195808	0.0382534	-3.14761	0.00164608	Brain_Hypothalamus
ARHGAP9	12	57472264	57488814	0.16397	-3.1461	0.00165466	Pituitary
ZNF638	2	71276561	71435069	0.0482593	3.14493	0.00166126	Pituitary
KBTBD6	13	41127569	41132802	0.0265066	3.13967	0.0016914	Whole_Blood
IP6K2	3	48688003	48740353	0.182473	3.13744	0.00170428	Pituitary
ITPK1	14	92936914	93116320	0.45153	-3.12351	0.0017871	Thyroid
WSB2	12	118032687	118062430	0.254671	3.11982	0.00180959	Whole_Blood
GTF2A2	15	59638062	59657541	0.0319226	3.117	0.001827	Pituitary
SLC22A4	5	132294394	132344190	0.0267144	3.11613	0.00183244	Whole_Blood
APOA2	1	161222292	161223631	0.0116438	3.11459	0.00184202	Whole_Blood
CCNT2	2	134918235	134959342	0.246394	-3.10567	0.00189851	Thyroid
LINC00336	6	33586104	33593338	0.0511839	-3.09963	0.00193765	Thyroid
PGAP1	2	196833004	196927796	0.0196772	3.09323	0.00197991	Whole_Blood
THBD	20	23045633	23049672	0.0841394	-3.09214	0.0019872	Whole_Blood
C19orf54	19	40740856	40751553	0.320532	-3.09144	0.00199189	Thyroid
MCRIP2	16	636817	648474	0.0461003	-3.09042	0.00199876	Pituitary
THUMPD1	16	20702816	20742084	0.0131353	-3.08919	0.002007	Thyroid
LINC02687	11	45371397	45388511	0.0369233	3.08669	0.002024	Brain_Hypothalamus
METTL15	11	28108248	28527041	0.132477	-3.08325	0.00204752	Thyroid
DOCK9	13	98793429	99086625	0.0638648	-3.08258	0.00205217	Pituitary
DUS2	16	67987746	68079320	0.28968	3.0732	0.00211777	Whole_Blood
ZNF761	19	53431984	53461862	0.0811885	3.06864	0.00215034	Whole_Blood
HMGA2-AS1	12	65851340	65882167	0.0174143	3.06847	0.00215158	Thyroid
EFL1	15	82130206	82262773	0.0374881	3.06809	0.00215435	Pituitary
ROPN1	3	123968521	123992178	0.0243175	-3.0663	0.00216724	Brain_Hypothalamus
PSMB10	16	67934506	67936864	0.0137409	-3.06359	0.002187	Thyroid
ZNF431	19	21142024	21196053	0.0567558	3.06308	0.00219069	Brain_Hypothalamus
TYMS	18	657653	673578	0.0494554	3.06221	0.00219709	Whole_Blood
CD164L2	1	27379176	27383333	0.213383	-3.06152	0.00220218	Brain_Hypothalamus
DUSP16	12	12473282	12562863	0.0208944	3.05754	0.00223163	Thyroid
ZNF774	15	90352284	90369146	0.196086	3.05288	0.00226659	Thyroid
COLEC12	18	316737	500722	0.036783	-3.05087	0.00228181	Pituitary
RASA2	3	141487027	141615344	0.0172907	3.04835	0.002301	Thyroid
PNPO	17	47941506	47949308	0.143794	-3.04567	0.00232166	Thyroid
AATK	17	81110487	81166221	0.0423862	3.04255	0.00234583	Pituitary
MCM6	2	135839626	135876443	0.12063	-3.04178	0.00235184	Thyroid
FAM167A	8	11421476	11475908	0.027785	3.03637	0.00239448	Pituitary
PRSS8	16	31131433	31135727	0.0676109	3.03442	0.00240995	Thyroid
TPM3	1	154155308	154194648	0.0677724	3.03398	0.00241349	Whole_Blood
STAT5A	17	42287547	42311943	0.0240193	3.03234	0.00242665	Thyroid
EDC4	16	67873052	67884499	0.0267277	3.03169	0.0024319	Whole_Blood
GCHFR	15	40764068	40767708	0.0100705	3.02932	0.00245102	Whole_Blood
PRXL2B	1	2586491	2591469	0.0459811	3.02837	0.00245873	Brain_Hypothalamus
AKR7A2	1	19303965	19312144	0.0236171	3.02801	0.00246169	Pituitary
ADPRH	3	119579268	119589945	0.240852	3.02769	0.00246433	Brain_Hypothalamus
TRIM62	1	33145399	33182059	0.0128347	-3.02759	0.00246511	Thyroid
C3orf62	3	49268596	49277232	0.0297031	-3.02638	0.00247501	Pituitary
RHOT2	16	668100	674174	0.0362035	3.01936	0.00253306	Thyroid
GDF5	20	35433347	35454746	0.0540315	3.01782	0.00254597	Thyroid
TSTD2	9	97600080	97633368	0.0316454	3.01762	0.00254765	Thyroid
ADD3	10	109996368	110135565	0.0326117	-3.01748	0.00254888	Brain_Hypothalamus
MARS	12	57475445	57517569	0.0126038	3.0173	0.00255035	Whole_Blood
LINC00426	13	30340267	30377145	0.0847798	3.01671	0.00255532	Thyroid
ABHD8	19	17292131	17310236	0.0978002	-3.01596	0.00256165	Thyroid
ZNF213	16	3129777	3142804	0.0955568	-3.01525	0.00256764	Pituitary
DSCAML1	11	117427772	117817525	0.0739815	3.01418	0.00257677	Thyroid
CBX1	17	48070052	48101478	0.0731783	3.01373	0.00258054	Thyroid
ITIH2	10	7703316	7749520	0.0414369	-3.01224	0.00259325	Whole_Blood
INAFM1	19	47274885	47275723	0.0264224	3.01154	0.00259923	Thyroid
POLR2L	11	837356	842529	0.0130038	3.00935	0.00261804	Thyroid
BUD31	7	99408641	99419616	0.0271851	3.00819	0.00262812	Brain_Hypothalamus
CDC14B	9	96490241	96619843	0.0202653	-3.0049	0.00265664	Thyroid
KLHL17	1	960584	965719	0.081551	-3.00282	0.0026749	Whole_Blood
GATAD2B	1	153789030	153923360	0.0366642	3.00235	0.002679	Brain_Hypothalamus
MRPL34	19	17292609	17306843	0.310274	2.99989	0.00270075	Whole_Blood
ARHGEF26-AS1	3	154024401	154121347	0.224813	-2.9998	0.00270156	Brain_Hypothalamus
DHX57	2	38797729	38875934	0.120838	-2.99692	0.00272724	Whole_Blood
TMEM267	5	43444252	43483893	0.0102959	2.99596	0.00273581	Thyroid
RRP12	10	97356358	97426076	0.343756	2.99302	0.00276232	Whole_Blood
LGMN	14	92703807	92748679	0.0215297	-2.99191	0.00277234	Whole_Blood
TMEM170A	16	75443054	75465497	0.0310559	2.98768	0.00281105	Whole_Blood
NUP107	12	68686951	68745809	0.029951	2.98454	0.0028401	Whole_Blood
CADM4	19	43622368	43639850	0.0222038	2.98395	0.00284554	Pituitary
USP4	3	49277144	49340712	0.0222102	2.9812	0.00287122	Thyroid
DOCK8	9	214854	465259	0.13454	-2.97927	0.00288935	Brain_Hypothalamus
BCL2L2	14	23298790	23311751	0.0484521	2.97876	0.0028942	Thyroid
KALRN	3	124033369	124726325	0.32901	-2.97581	0.00292219	Thyroid
ST14	11	130159782	130210362	0.178396	-2.97576	0.00292263	Pituitary
ADGRF5	6	46852522	46954943	0.0959564	-2.97507	0.00292926	Thyroid
FBXO21	12	117141991	117190470	0.0510334	-2.97127	0.00296569	Pituitary
CTDNEP1	17	7243591	7252491	0.0406369	2.96978	0.00298009	Thyroid
CASKIN1	16	2177180	2196605	0.0456687	2.96817	0.00299581	Thyroid
CEP85	1	26234200	26278808	0.115257	2.96548	0.00302213	Whole_Blood
PTN	7	137227341	137343774	0.0744197	2.9591	0.00308541	Brain_Hypothalamus
CATSPERE	1	244454377	244641177	0.17721	2.9584	0.00309245	Thyroid
NBL1	1	19596979	19658456	0.0378277	-2.95777	0.00309875	Thyroid
RRP7A	22	42508344	42519796	0.347528	-2.95613	0.00311525	Whole_Blood
ZBTB14	18	5289019	5297053	0.030442	-2.95595	0.00311704	Thyroid
KIF2C	1	44739818	44767767	0.0292319	-2.9557	0.00311965	Pituitary
CRTC2	1	153947669	153958615	0.0190126	-2.95541	0.00312252	Thyroid
TOMM40L	1	161225939	161230746	0.0228445	2.9549	0.00312775	Thyroid
ZNF205	16	3112560	3120517	0.405841	2.95257	0.00315139	Whole_Blood
NDUFB8	10	100523740	100530000	0.0631153	2.95128	0.00316464	Whole_Blood
MZT1	13	72708367	72727629	0.0200098	2.94411	0.00323886	Thyroid
VKORC1	16	31090842	31095980	0.0241512	-2.94257	0.00325502	Thyroid
SLC8A1	2	40097270	40611053	0.0371378	-2.94246	0.00325615	Pituitary
ZNF24	18	35332227	35345482	0.101295	2.94006	0.00328153	Whole_Blood
AURKB	17	8204733	8210600	0.0184855	2.93809	0.0033024	Whole_Blood
LLPH	12	66116555	66130750	0.242162	2.93272	0.00336003	Pituitary
XBP1	22	28794555	28800597	0.0187692	2.93182	0.00336978	Whole_Blood
SFMBT2	10	7158624	7411488	0.034972	-2.93119	0.00337664	Pituitary
CTC1	17	8224815	8248058	0.270696	2.92936	0.00339656	Whole_Blood
SPSB1	1	9292894	9369532	0.0105638	-2.92893	0.00340133	Thyroid
ACLY	17	41866917	41930542	0.100624	-2.92809	0.00341049	Thyroid
OCLN	5	69492292	69558104	0.157483	2.92266	0.00347052	Pituitary
CD93	20	23079360	23086324	0.309045	-2.91697	0.00353449	Whole_Blood
WASIR2	16	22910	25123	0.370472	2.91673	0.00353719	Pituitary
ANKDD1A	15	64911902	64958691	0.0348186	-2.91512	0.0035555	Pituitary
MYCBPAP	17	50508425	50531501	0.275813	-2.90928	0.00362267	Thyroid
C1RL	12	7089587	7109238	0.0568836	2.90793	0.00363831	Whole_Blood
DLEU1	13	50082169	50906856	0.0293322	-2.90679	0.00365158	Whole_Blood
STARD7-AS1	2	96208389	96243353	0.0197125	-2.90582	0.00366295	Thyroid
KIAA2013	1	11919591	11926428	0.22131	2.90295	0.0036966	Whole_Blood
PMEL	12	55954105	55973317	0.120398	-2.90276	0.00369887	Pituitary
ECHDC2	1	52895910	52927212	0.268189	2.9025	0.00370192	Whole_Blood
PAIP2B	2	71182738	71227103	0.0102369	2.902	0.00370792	Thyroid
ZNF687-AS1	1	151279678	151282000	0.0178102	-2.90106	0.003719	Pituitary
CTSV	9	97029677	97156556	0.0416928	-2.90068	0.0037235	Thyroid
REEP3	10	63521401	63625128	0.0194991	2.90037	0.00372719	Whole_Blood
DAB1	1	56994778	58546734	0.161868	-2.9003	0.0037281	Pituitary
SSR1	6	7268306	7347446	0.0793671	-2.89824	0.00375269	Pituitary
KRTAP5-8	11	71538025	71539209	0.032928	2.89373	0.00380692	Thyroid
RPS8	1	44775251	44778779	0.115646	-2.89269	0.00381959	Pituitary
KCTD19	16	67289428	67326760	0.0483928	2.88952	0.00385834	Thyroid
RPS6KA4	11	64359148	64372215	0.0108938	2.88823	0.00387423	Thyroid
UQCC1	20	35302566	35412031	0.0970839	-2.88759	0.00388211	Whole_Blood
ZNF560	19	9466355	9498616	0.0571756	2.88742	0.00388412	Thyroid
WDR86	7	151375909	151410727	0.0622665	2.88487	0.0039158	Pituitary
RHBDL1	16	675671	678268	0.042442	2.88153	0.00395745	Pituitary
ZNF599	19	34758073	34773229	0.0106647	-2.88147	0.00395826	Thyroid
TMEM81	1	205083129	205084460	0.045416	-2.88145	0.00395846	Brain_Hypothalamus
SELP	1	169588849	169630193	0.0474909	-2.88113	0.00396252	Whole_Blood
MPZL2	11	118253416	118264536	0.141704	2.88032	0.00397274	Whole_Blood
LINC00324	17	8220624	8224043	0.0116292	2.87624	0.00402448	Thyroid
MFHAS1	8	8783354	8893630	0.0452127	2.87533	0.0040361	Whole_Blood
TPO	2	1374066	1543711	0.397591	-2.87518	0.00403792	Thyroid
RASSF2	20	4780023	4823608	0.0242479	-2.87363	0.00405782	Whole_Blood
EIF4A3	17	80134369	80147151	0.026872	-2.86846	0.0041248	Whole_Blood
CYP26C1	10	93060798	93069540	0.0485054	2.86825	0.00412744	Brain_Hypothalamus
PTGER2	14	52314305	52328598	0.0565608	-2.86585	0.00415895	Whole_Blood
OLFML3	1	113979391	114035572	0.114171	-2.86435	0.00417872	Thyroid
EPB41L4A-DT	5	112419583	112420978	0.0179419	2.86375	0.00418655	Thyroid
REV1	2	99400475	99490035	0.0974904	-2.86113	0.00422133	Thyroid
PROC	2	127418427	127429242	0.0515154	2.85866	0.0042544	Thyroid
AURKA	20	56369389	56392337	0.0198151	2.85542	0.00429796	Pituitary
TRIR	19	12730640	12734684	0.0162938	-2.85422	0.00431429	Pituitary
SPC24	19	11131520	11155807	0.106613	2.8521	0.00434316	Pituitary
EIF4G3	1	20806292	21177285	0.0538388	-2.85036	0.004367	Pituitary
C9orf16	9	128160265	128163924	0.0107985	-2.84964	0.00437681	Whole_Blood
FKBP2	11	64241003	64244132	0.0228197	2.84816	0.00439732	Brain_Hypothalamus
FAM155A	13	107163510	107867496	0.0521965	2.84766	0.0044042	Thyroid
CDA	1	20589086	20618903	0.149993	-2.84711	0.00441178	Brain_Hypothalamus
RHEBL1	12	49064676	49070025	0.0489305	-2.84561	0.00443262	Pituitary
FASTKD2	2	206765357	206796189	0.0118343	2.84445	0.00444885	Whole_Blood
SPHK1	17	76376584	76387860	0.0480103	-2.84397	0.00445557	Thyroid
LINC01106	2	110375138	110384442	0.151276	2.84207	0.00448216	Thyroid
FAM177A1	14	35045117	35116630	0.0525051	-2.84013	0.00450957	Pituitary
USP18	22	18150118	18177397	0.0326433	-2.83758	0.00454573	Brain_Hypothalamus
NUS1	6	117675469	117710727	0.0739719	2.83668	0.00455857	Pituitary
GAS2L1	22	29306618	29312787	0.111085	-2.83603	0.00456783	Pituitary
ANKRD18B	9	33524251	33608848	0.167473	-2.83286	0.00461329	Brain_Hypothalamus
ATF5	19	49928702	49933935	0.0381882	2.83231	0.00462125	Brain_Hypothalamus
PLCB3	11	64251530	64269150	0.031489	-2.82943	0.00466317	Whole_Blood
DENND4A	15	65658046	65792293	0.0545613	2.82905	0.0046687	Whole_Blood
MYZAP	15	57591904	57685364	0.0452563	-2.8286	0.00467521	Pituitary
NPIPB4	16	21834582	21880827	0.192184	2.82829	0.00467977	Thyroid
TMEM160	19	47045909	47048624	0.0709517	-2.82752	0.004691	Brain_Hypothalamus
CLTA	9	36190856	36304781	0.0142866	2.82686	0.00470062	Thyroid
JAML	11	118193725	118225092	0.0406365	2.82667	0.00470349	Whole_Blood
SLPI	20	45252239	45254564	0.0182036	2.82663	0.00470401	Whole_Blood
WASF2	1	27404230	27490167	0.024381	-2.82601	0.00471316	Whole_Blood
SMPD3	16	68358327	68448508	0.0481303	2.82591	0.00471469	Thyroid
LRP6	12	12116025	12267044	0.0325809	-2.82491	0.00472945	Brain_Hypothalamus
UAP1L1	9	137077517	137084539	0.0406112	2.8237	0.00474731	Pituitary
RPS6	9	19375715	19380236	0.0869836	2.82272	0.00476182	Thyroid
S100A5	1	153537147	153541765	0.014709	2.8222	0.00476952	Thyroid
NBEA	13	34942270	35673022	0.0119717	-2.82182	0.00477525	Whole_Blood
PDZRN4	12	41188320	41574745	0.0101053	-2.8208	0.00479041	Thyroid
MTMR9	8	11284816	11328146	0.0833989	2.82061	0.00479322	Thyroid
TMEM19	12	71686082	71705047	0.0139977	2.82001	0.00480222	Whole_Blood
UMAD1	7	7640711	7968020	0.368042	-2.81876	0.00482092	Pituitary
B3GNT3	19	17794828	17813576	0.026841	-2.81603	0.00486207	Whole_Blood
ATP5F1C	10	7788147	7807815	0.0535775	-2.81386	0.00489498	Pituitary
CLCN6	1	11806096	11848079	0.326633	2.81347	0.00490095	Whole_Blood
RAB3C	5	58582221	58859394	0.0630041	-2.81138	0.00493296	Thyroid
DAAM1	14	59188646	59371405	0.0837614	2.80988	0.00495593	Thyroid
SLC25A44	1	156193932	156212796	0.130693	-2.80693	0.00500168	Thyroid
DUOXA1	15	45117366	45129938	0.0257947	-2.80652	0.005008	Brain_Hypothalamus
COMT	22	19941371	19969975	0.091154	2.80635	0.00501062	Thyroid
TEFM	17	30897336	30906238	0.0394594	-2.80595	0.00501687	Thyroid
PDE4D	5	58969038	60522120	0.0137198	2.80548	0.00502417	Thyroid
TBC1D8	2	101007228	101252866	0.0166589	-2.80428	0.00504287	Thyroid
SNTB2	16	69187147	69309052	0.102633	2.79838	0.00513593	Whole_Blood
ZNF628	19	55476617	55484487	0.0211659	-2.7944	0.0051996	Whole_Blood
VSIG10	12	118063593	118136026	0.378782	2.79084	0.00525713	Whole_Blood
GPR176	15	39799008	39920936	0.0149456	2.78754	0.00531092	Whole_Blood
LYSMD2	15	51723011	51751585	0.0291923	2.78615	0.00533374	Brain_Hypothalamus
CLIP2	7	74289407	74405935	0.0233338	-2.78352	0.00537734	Whole_Blood
SLC5A11	16	24845841	24911628	0.550287	2.78189	0.00540429	Thyroid
MEAK7	16	84476355	84554033	0.0674354	2.78102	0.00541889	Pituitary
CD164	6	109366514	109382467	0.0245251	2.78016	0.00543329	Pituitary
KIF3B	20	32277651	32335011	0.0593721	-2.77805	0.00546866	Brain_Hypothalamus
AGK	7	141551278	141655244	0.0209684	-2.7779	0.00547122	Whole_Blood
TUBGCP4	15	43369221	43409771	0.0549469	-2.77527	0.00551554	Brain_Hypothalamus
ZMAT5	22	29730956	29767011	0.0251184	2.77243	0.00556395	Whole_Blood
TBC1D2	9	98199011	98255649	0.413323	2.77204	0.00557061	Brain_Hypothalamus
CEP83	12	94306449	94459988	0.149036	2.7691	0.00562118	Thyroid
USP28	11	113797874	113875572	0.0447628	-2.76844	0.00563245	Thyroid
DUSP12	1	161749758	161757238	0.0290243	2.76701	0.00565734	Thyroid
PPARD	6	35342558	35428191	0.0266752	2.76585	0.00567742	Thyroid
LGALS9C	17	18476737	18494945	0.0585986	2.76387	0.0057121	Thyroid
MICB	6	31494881	31511124	0.32082	-2.7636	0.00571674	Thyroid
MRPL36	5	1798385	1801366	0.160956	-2.76324	0.00572311	Thyroid
JMY	5	79236131	79327211	0.0730923	-2.76193	0.00574606	Whole_Blood
TMEM265	16	30740642	30745196	0.0256866	2.76174	0.00574946	Pituitary
POGLUT1	3	119468963	119494708	0.224735	-2.76052	0.0057709	Whole_Blood
MEX3B	15	82041778	82046119	0.010203	2.76023	0.00577608	Thyroid
SLC16A6	17	68267026	68291267	0.0453561	-2.75777	0.00581967	Whole_Blood
KLRC4	12	10407384	10409757	0.07335	-2.75643	0.00584354	Whole_Blood
ACRBP	12	6638075	6647433	0.0333647	2.75554	0.00585959	Brain_Hypothalamus
HS6ST1	2	128236716	128318868	0.0477923	-2.75383	0.00589021	Pituitary
LINC02200	5	112628436	112682077	0.0698348	-2.75111	0.0059394	Pituitary
BMP4	14	53949736	53958761	0.0314568	2.74984	0.00596244	Pituitary
ZNF48	16	30378106	30400108	0.0477743	2.74932	0.00597193	Pituitary
SLC2A4	17	7281718	7288257	0.101038	2.74487	0.00605355	Pituitary
PRPF40A	2	152651593	152718012	0.0292575	2.7424	0.00609914	Thyroid
STON2	14	81260652	81436465	0.0278667	2.74162	0.00611368	Thyroid
DYNC1I2	2	171687409	171750158	0.0421732	-2.7384	0.00617394	Brain_Hypothalamus
VWDE	7	12330885	12403941	0.462393	-2.73725	0.00619549	Pituitary
AKIP1	11	8911139	8920084	0.132596	-2.73721	0.00619629	Pituitary
FAM66A	8	12362019	12388296	0.383651	2.73652	0.00620936	Brain_Hypothalamus
PIBF1	13	72782133	73016461	0.115515	-2.7361	0.0062173	Pituitary
MVB12B	9	126326829	126507041	0.0297909	-2.73531	0.00623218	Pituitary
SMIM26	20	18567347	18569563	0.0403951	-2.73291	0.00627769	Thyroid
TGFB1	19	41301587	41353922	0.0632382	-2.73243	0.00628694	Pituitary
DCSTAMP	8	104339087	104356689	0.0812345	-2.73158	0.00630317	Brain_Hypothalamus
PTPN13	4	86594315	86815171	0.0198892	2.73051	0.00632374	Pituitary
TMEM250	9	136114581	136118875	0.0984306	-2.72908	0.00635113	Thyroid
VEGFC	4	176683538	176792922	0.0690064	2.72839	0.00636445	Thyroid
PINK1-AS	1	20642657	20652193	0.301513	-2.7247	0.00643604	Pituitary
MBLAC1	7	100126785	100128495	0.150665	-2.72446	0.00644066	Whole_Blood
BAHD1	15	40439721	40468236	0.051692	-2.72314	0.00646643	Whole_Blood
FAM89B	11	65572349	65574198	0.0253321	-2.72307	0.0064679	Thyroid
TIMMDC1	3	119498547	119525090	0.0513724	2.72273	0.00647457	Whole_Blood
LINC00667	18	5237826	5290608	0.294973	2.72172	0.00649427	Brain_Hypothalamus
ABHD12B	14	50872053	50904970	0.0403936	2.72103	0.00650782	Thyroid
TGFBI	5	136028988	136063818	0.128816	-2.72008	0.00652652	Whole_Blood
GET3	19	12737139	12748323	0.0120951	-2.7198	0.00653218	Thyroid
ALG12	22	49900229	49918438	0.112429	-2.71741	0.00657952	Pituitary
DCTN2	12	57529633	57547224	0.0193338	-2.71643	0.00659904	Thyroid
CCDC34	11	27330827	27363234	0.0155548	2.71623	0.00660294	Whole_Blood
JAK1	1	64833223	65067754	0.136271	2.71591	0.00660934	Thyroid
MCM7	7	100092233	100101940	0.0138142	-2.71419	0.00664373	Whole_Blood
SLIRP	14	77708071	77761104	0.0225502	2.71416	0.00664435	Whole_Blood
LINC00222	6	108751654	108769942	0.0580542	-2.71238	0.00668011	Thyroid
CTSB	8	11842524	11869533	0.0747415	-2.71057	0.00671679	Brain_Hypothalamus
FBL	19	39834458	39846379	0.0929892	-2.71035	0.00672117	Brain_Hypothalamus
TENT2	5	79612120	79688246	0.0203794	2.70841	0.00676067	Whole_Blood
CAPN15	16	527712	554636	0.0994182	-2.70548	0.00682054	Brain_Hypothalamus
TNFAIP2	14	103121476	103137439	0.0192415	-2.70414	0.00684805	Whole_Blood
PTK6	20	63528001	63537376	0.0303023	2.70329	0.0068656	Thyroid
EHD4	15	41895933	41972557	0.0953177	2.70298	0.00687219	Brain_Hypothalamus
ABRACL	6	139028745	139043302	0.28337	-2.70008	0.0069322	Pituitary
DXO	6	31969810	31972290	0.122482	-2.69815	0.0069726	Pituitary
FXR2	17	7591230	7614897	0.023192	-2.6974	0.00698834	Thyroid
CERS3	15	100400395	100544995	0.141391	2.6968	0.00700095	Whole_Blood
GRN	17	44345246	44353106	0.105589	2.69583	0.00702138	Thyroid
MDS2	1	23581495	23640568	0.0117193	-2.69565	0.00702521	Whole_Blood
RNASEH2B	13	50909747	51024120	0.41564	-2.69492	0.0070406	Thyroid
GSS	20	34928432	34956027	0.0282438	2.69391	0.00706193	Pituitary
TMEM171	5	73120569	73131809	0.0474953	2.69332	0.00707442	Whole_Blood
ZNF140	12	133080474	133107526	0.0234283	-2.69235	0.00709498	Pituitary
LCA5	6	79484991	79537458	0.013139	-2.69101	0.00712354	Thyroid
PUM3	9	2720469	2844095	0.0212844	2.68955	0.00715486	Thyroid
ADCY7	16	50246137	50318135	0.190091	-2.68869	0.00717329	Whole_Blood
BCAT2	19	48795062	48811029	0.0333869	-2.68717	0.007206	Whole_Blood
CLDN7	17	7259903	7263983	0.102651	2.68673	0.00721555	Thyroid
MILR1	17	64449037	64468643	0.316788	2.68591	0.00723321	Whole_Blood
SLC1A4	2	64988477	65023865	0.0888773	2.68539	0.00724461	Whole_Blood
HS6ST3	13	96090107	96839562	0.0902592	-2.6846	0.00726164	Thyroid
ZNF578	19	52453553	52516882	0.074097	2.68401	0.00727457	Brain_Hypothalamus
SLC7A11	4	138164097	138242349	0.0400227	-2.68334	0.007289	Brain_Hypothalamus
GLIS3-AS1	9	3898642	3901248	0.0584741	2.68213	0.00731542	Pituitary
ARMH1	1	44674692	44725591	0.0169574	-2.6807	0.00734678	Whole_Blood
IFNE	9	21480839	21482313	0.0418797	-2.68052	0.00735088	Pituitary
PLEKHO2	15	64841883	64868002	0.0311384	2.67974	0.00736783	Thyroid
ANKRD44	2	196967017	197311173	0.06852	-2.67836	0.00739843	Pituitary
UCHL5	1	193012250	193060080	0.0156833	-2.67681	0.0074327	Thyroid
TPTE2	13	19422876	19561625	0.0193681	2.6756	0.00745957	Thyroid
MKRN2	3	12557057	12586208	0.140856	-2.67463	0.00748118	Pituitary
LINC01703	1	226083590	226090465	0.0552945	2.67437	0.00748689	Pituitary
SHPK	17	3608240	3636250	0.501228	2.67422	0.00749044	Brain_Hypothalamus
PCOLCE2	3	142815922	142889206	0.0117762	2.6732	0.00751316	Whole_Blood
EFCAB6-AS1	22	43516107	43560063	0.0382294	2.67266	0.00752528	Thyroid
ADAP2	17	30906344	30959322	0.0241694	2.67067	0.00757	Thyroid
ACADVL	17	7217125	7225266	0.182442	-2.66963	0.00759345	Whole_Blood
LINC00499	4	138309613	138663403	0.505891	2.6696	0.0075942	Brain_Hypothalamus
PCNX3	11	65615776	65637439	0.0732737	2.66913	0.0076047	Thyroid
SERINC5	5	80111651	80256048	0.268585	2.66879	0.00761255	Thyroid
SLC26A8	6	35943516	36024868	0.224987	2.66869	0.00761488	Brain_Hypothalamus
SLC5A1	22	32043261	32113029	0.0431487	-2.66844	0.00762044	Thyroid
ENDOD1	11	95089846	95132645	0.0839801	2.66671	0.00765984	Whole_Blood
PLK1	16	23677656	23690367	0.029127	-2.66483	0.00770264	Brain_Hypothalamus
GATD1	11	767220	777488	0.319083	2.66389	0.00772423	Pituitary
BAIAP2L2	22	38084652	38111015	0.0113428	-2.66368	0.00772902	Whole_Blood
ABLIM3	5	149141483	149260542	0.188825	-2.66309	0.0077426	Pituitary
CCDC17	1	45620044	45624057	0.0237077	-2.66234	0.00775985	Whole_Blood
SLC39A1	1	153959099	153968184	0.0893718	2.66218	0.00776353	Whole_Blood
NCOA6	20	34689097	34825651	0.124367	-2.66201	0.00776766	Thyroid
CHRNA4	20	63343223	63378401	0.0500842	-2.66154	0.00777838	Thyroid
ATP1B2	17	7646627	7657770	0.0521419	-2.66058	0.00780058	Brain_Hypothalamus
CSNK1G3	5	123512177	123617049	0.0287198	-2.65999	0.00781439	Whole_Blood
STMN3	20	63639705	63657682	0.079076	-2.65957	0.00782412	Pituitary
LINC00896	22	20206380	20208524	0.109666	-2.65917	0.0078334	Thyroid
MED13	17	61942605	62065278	0.0640089	-2.65916	0.00783347	Thyroid
ARPC1B	7	99374249	99394816	0.238968	-2.65894	0.00783881	Thyroid
DAPK2	15	63907036	64072033	0.0186172	-2.65561	0.00791644	Pituitary
FAM222B	17	28755980	28855232	0.0197518	2.65516	0.00792712	Thyroid
COX7A2	6	75237675	75250323	0.0149147	-2.65513	0.00792768	Whole_Blood
GSTA1	6	52791371	52803860	0.0103854	2.65504	0.00792994	Thyroid
C8orf37	8	95244913	95269201	0.0577645	-2.65304	0.00797707	Pituitary
CLCA4	1	86547078	86580754	0.0412751	-2.65203	0.00800096	Brain_Hypothalamus
ITK	5	157142933	157255185	0.0173948	2.65164	0.00801027	Whole_Blood
CD274	9	5450503	5470566	0.150997	-2.65097	0.00802599	Whole_Blood
DNMT3B	20	32762385	32809359	0.0251485	-2.65003	0.00804839	Thyroid
CTSL	9	87724051	87731469	0.0318468	-2.65002	0.0080487	Whole_Blood
SHISA3	4	42397488	42402487	0.0929656	2.64871	0.00808001	Brain_Hypothalamus
RNF170	8	42849637	42897290	0.0562356	-2.64787	0.00809996	Thyroid
ZNF512B	20	63956704	63969930	0.0430397	2.64707	0.00811917	Pituitary
SDC3	1	30869466	30908758	0.0476274	-2.64624	0.00813919	Brain_Hypothalamus
TNRC6B	22	40044817	40335808	0.0175394	-2.64496	0.00817014	Pituitary
INPP5J	22	31122731	31134697	0.0391778	-2.64478	0.00817438	Brain_Hypothalamus
SELENOM	22	31104772	31120069	0.0428353	-2.64442	0.00818302	Thyroid
CEP250	20	35455164	35519280	0.0568834	2.64404	0.0081922	Thyroid
CNOT1	16	58519951	58629885	0.0528382	-2.64345	0.00820658	Brain_Hypothalamus
CLN6	15	68206992	68257211	0.244218	2.64268	0.00822529	Whole_Blood
RPS14	5	150442635	150449739	0.114691	-2.64135	0.00825766	Pituitary
MTFMT	15	65001512	65029639	0.0289132	-2.64102	0.00826568	Whole_Blood
DAP3	1	155687960	155739010	0.0233895	-2.63944	0.0083043	Thyroid
LCMT2	15	43323649	43330582	0.050552	2.63864	0.00832405	Brain_Hypothalamus
WNK1	12	752579	911452	0.017832	-2.63786	0.0083431	Thyroid
USP15	12	62260338	62417431	0.0868879	2.63419	0.00843388	Thyroid
CYP4F26P	9	33580695	33607874	0.187179	-2.63354	0.00844989	Brain_Hypothalamus
DCBLD2	3	98795941	98901695	0.168668	-2.63338	0.00845402	Pituitary
OAZ3	1	151762899	151771334	0.0430529	-2.6325	0.00847598	Brain_Hypothalamus
RBM34	1	235131183	235161283	0.0399553	2.63215	0.00848472	Pituitary
MMP2	16	55389700	55506691	0.0683176	2.63199	0.00848864	Pituitary
TP53BP1	15	43403061	43510728	0.0474426	2.63125	0.00850723	Pituitary
CLIP4	2	29097705	29199777	0.0481544	2.63109	0.0085111	Whole_Blood
BCL2L11	2	111119378	111168444	0.0456985	2.63078	0.00851884	Pituitary
CMC1	3	28241584	28325142	0.0129062	2.63062	0.00852284	Thyroid
BORA	13	72727749	72756198	0.0772267	2.63034	0.00852996	Thyroid
STIM2	4	26857601	27025381	0.233276	-2.62689	0.00861699	Whole_Blood
MYCBP2	13	77042474	77327094	0.0150465	-2.626	0.0086396	Thyroid
DEPP1	10	44970981	44978809	0.0105241	2.62597	0.00864021	Thyroid
MSL1	17	40121971	40136917	0.257426	-2.62529	0.00865748	Thyroid
MFN2	1	11980181	12015211	0.0880405	-2.61936	0.00880954	Brain_Hypothalamus
WDR87	19	37884823	37906677	0.34504	2.61864	0.00882813	Thyroid
FAM85B	8	8167819	8226614	0.401211	-2.6184	0.00883432	Brain_Hypothalamus
CENPP	9	92325953	92620529	0.126393	-2.61823	0.0088387	Whole_Blood
ZMPSTE24	1	40258041	40294180	0.0228225	2.61815	0.00884088	Brain_Hypothalamus
P2RX6	22	21009808	21028013	0.0202362	-2.61767	0.00885335	Whole_Blood
EPHB6	7	142855061	142871094	0.473731	-2.61661	0.00888084	Thyroid
P3H4	17	41801947	41812604	0.0697711	-2.61656	0.008882	Thyroid
CAPN10	2	240586734	240617705	0.0777947	2.61492	0.00892489	Thyroid
ATG10	5	81972023	82276857	0.46356	-2.61469	0.00893074	Whole_Blood
IMPG1	6	75921114	76072678	0.0512055	2.61425	0.00894238	Thyroid
ERLIN1	10	100150094	100186033	0.0550484	-2.61091	0.00903022	Brain_Hypothalamus
TBL1XR1	3	177019340	177228000	0.0485832	-2.61083	0.00903241	Thyroid
RHBDD3	22	29259872	29268209	0.120063	2.60989	0.00905711	Brain_Hypothalamus
NDUFS6	5	1801407	1816048	0.0361032	2.60916	0.00907636	Thyroid
SNAPIN	1	153658703	153661852	0.0651041	2.60902	0.00908021	Whole_Blood
IL16	15	81159575	81314058	0.0371378	-2.60843	0.00909588	Pituitary
TEX54	11	62832321	62832841	0.0128184	2.60659	0.00914501	Thyroid
VAMP3	1	7771296	7781432	0.112891	2.60616	0.00915645	Brain_Hypothalamus
NAA60	16	3443649	3486953	0.156501	-2.6026	0.00925209	Whole_Blood
ATRIP	3	48446710	48467645	0.0728267	-2.60167	0.00927724	Whole_Blood
ZNF607	19	37696371	37719761	0.0405646	2.60097	0.00929609	Thyroid
DHX32	10	125836337	125896436	0.111167	-2.60052	0.00930821	Thyroid
PUM2	2	20248691	20352234	0.0241476	-2.59944	0.00933766	Thyroid
ASB7	15	100602589	100651701	0.0399559	-2.59918	0.00934471	Whole_Blood
FAM225A	9	113113042	113119928	0.0164462	2.59726	0.00939713	Thyroid
NUCB1	19	48900050	48923473	0.046468	-2.59645	0.00941928	Pituitary
LINC01605	8	37421341	37554183	0.0271439	-2.5959	0.00943443	Pituitary
IFT88	13	20567138	20691444	0.114329	2.59483	0.00946386	Brain_Hypothalamus
NUDT4	12	93377883	93408146	0.0122215	-2.59474	0.00946625	Whole_Blood
CCER2	19	38908980	38912186	0.0331573	-2.59178	0.009548	Pituitary
LINC02355	4	149154279	149278123	0.0129656	-2.5909	0.00957241	Thyroid
ASCC1	10	72096032	72217134	0.0788545	-2.5904	0.00958643	Whole_Blood
LEPROTL1	8	30095408	30177208	0.128996	2.59034	0.00958807	Pituitary
PCNX2	1	232983435	233295725	0.0494896	-2.59026	0.00959023	Pituitary
LIG1	19	48115445	48170603	0.032062	2.58913	0.00962184	Brain_Hypothalamus
CTTN	11	70398404	70436584	0.106526	2.58759	0.00966486	Thyroid
VEGFA	6	43770184	43786487	0.135431	-2.58675	0.00968867	Thyroid
IFT46	11	118544528	118572970	0.312829	2.58499	0.00973825	Pituitary
HLA-DOB	6	32812763	32820466	0.518616	-2.58481	0.00974327	Whole_Blood
PBX2	6	32184733	32190202	0.0162617	2.58468	0.00974698	Thyroid
GGT7	20	34844720	34872856	0.0284644	-2.58435	0.00975637	Brain_Hypothalamus
ALG11	13	52012391	52079232	0.0118727	2.5842	0.00976059	Whole_Blood
TMEM18	2	663877	677406	0.216185	-2.58413	0.00976254	Pituitary
CST3	20	23626706	23638473	0.0352239	-2.5841	0.00976332	Pituitary
HEYL	1	39623435	39639643	0.0327536	2.58401	0.00976597	Brain_Hypothalamus
EXOSC1	10	97435909	97446017	0.0252498	2.58208	0.00982068	Thyroid
EPB41L4A	5	112142441	112419313	0.313989	-2.5819	0.00982586	Thyroid
FAM83D	20	38926312	38953106	0.0298253	2.58177	0.00982946	Thyroid
NCBP1	9	97633668	97673748	0.0141689	2.57933	0.00989928	Thyroid
USP47	11	11841423	11961887	0.0470004	2.57928	0.00990051	Brain_Hypothalamus
KRTAP5-7	11	71527267	71528669	0.0351995	2.57904	0.00990748	Thyroid
LIMD1-AS1	3	45676369	45689200	0.036144	2.57888	0.009912	Brain_Hypothalamus
HOXA1	7	27092993	27096000	0.117599	-2.57753	0.00995091	Whole_Blood
ADCY9	16	3953387	4116442	0.227503	-2.57703	0.00996541	Whole_Blood
INSYN1	15	73735458	73753351	0.0320454	2.57678	0.00997247	Pituitary
MAST2	1	45786987	46036122	0.145693	-2.57673	0.00997395	Thyroid
KCNIP2	10	101825974	101843920	0.0412259	2.57558	0.0100072	Pituitary
TCTEX1D1	1	66752459	66779047	0.395462	-2.57284	0.0100867	Whole_Blood
ARHGAP12	10	31805398	31928876	0.013072	-2.57222	0.0101048	Whole_Blood
ARHGAP42	11	100687288	100993941	0.0591112	-2.57084	0.0101453	Thyroid
KIF17	1	20664014	20718017	0.117728	-2.57037	0.010159	Thyroid
ZNF98	19	22391019	22532485	0.192982	2.5692	0.0101934	Thyroid
SHBG	17	7613946	7633382	0.0206088	2.56834	0.0102188	Thyroid
MNDA	1	158831351	158849506	0.111076	-2.56822	0.0102221	Whole_Blood
SDHC	1	161314381	161363206	0.286837	-2.56709	0.0102556	Whole_Blood
RABL2A	2	113627229	113643396	0.346665	-2.56675	0.0102656	Thyroid
MIER1	1	66924895	66988619	0.0807529	-2.56648	0.0102735	Brain_Hypothalamus
LINC02535	6	85387219	85390186	0.0244933	2.56472	0.010326	Brain_Hypothalamus
GJB4	1	34759740	34762327	0.0109948	2.56451	0.010332	Thyroid
MAPRE1	20	32819954	32850405	0.226889	-2.56423	0.0103406	Whole_Blood
ECM2	9	92493554	92536655	0.010523	2.56414	0.0103432	Thyroid
LINC002481	4	6687448	6690544	0.114632	-2.56397	0.0103482	Whole_Blood
MLH1	3	36993226	37050896	0.0373578	2.56288	0.0103809	Thyroid
HPD	12	121839527	121863596	0.209641	2.56156	0.0104204	Whole_Blood
HHATL-AS1	3	42702541	42706776	0.107747	-2.56156	0.0104204	Thyroid
TMEM141	9	136791344	136793317	0.090086	-2.56072	0.0104457	Whole_Blood
CCDC175	14	59504539	59576812	0.032909	2.55968	0.0104768	Brain_Hypothalamus
UNCX	7	1232872	1237326	0.0489748	2.55908	0.010495	Pituitary
SGCD	5	155870344	156767788	0.0297235	-2.55893	0.0104995	Brain_Hypothalamus
ANXA2	15	60347134	60402883	0.0224722	-2.55618	0.0105828	Whole_Blood
UBR5	8	102252273	102412759	0.0126361	2.55588	0.0105919	Whole_Blood
NMI	2	151270470	151289894	0.0241962	-2.55545	0.0106051	Whole_Blood
HERC6	4	88378739	88443097	0.0237421	2.55485	0.0106233	Brain_Hypothalamus
TRIM22	11	5689610	5737089	0.069669	-2.5547	0.0106278	Brain_Hypothalamus
FRAT2	10	97332497	97334729	0.0852738	2.55326	0.0106719	Whole_Blood
ST3GAL6	3	98732236	98821201	0.0561018	2.55297	0.0106809	Brain_Hypothalamus
CCDC126	7	23597382	23644708	0.0365646	2.55266	0.0106904	Thyroid
ABCA3	16	2275881	2340746	0.0556035	2.5524	0.0106983	Brain_Hypothalamus
SEMA4A	1	156147366	156177752	0.0823242	2.552	0.0107105	Brain_Hypothalamus
SLC7A4	22	21028718	21032840	0.0177181	-2.55191	0.0107135	Pituitary
LY75	2	159803355	159904756	0.360441	2.55142	0.0107284	Thyroid
NCMAP	1	24556087	24609328	0.170833	-2.55046	0.010758	Pituitary
TMEM104	17	74776499	74839753	0.0123646	-2.54901	0.0108029	Whole_Blood
S100A1	1	153627926	153632039	0.0346329	2.54893	0.0108055	Brain_Hypothalamus
POLR3K	16	46407	53608	0.291169	-2.54808	0.0108318	Whole_Blood
RNF225	19	58395656	58397079	0.0579205	-2.54651	0.0108807	Pituitary
TSPAN33	7	129144707	129169699	0.0997136	2.54618	0.010891	Pituitary
PDE1B	12	54549601	54579239	0.123962	-2.54481	0.0109336	Whole_Blood
AP1B1	22	29327680	29388583	0.0341379	2.54467	0.010938	Whole_Blood
ZNF816	19	52949379	52962911	0.0240971	-2.54386	0.0109634	Whole_Blood
PREX2	8	67952046	68237032	0.0489686	-2.54342	0.0109772	Brain_Hypothalamus
TOMM34	20	44942130	44960397	0.0368821	-2.54339	0.0109784	Brain_Hypothalamus
CPS1	2	210477682	210679107	0.052282	-2.54312	0.0109866	Thyroid
CKMT1A	15	43692886	43699222	0.267884	2.54112	0.0110498	Thyroid
TNNT1	19	55132698	55149206	0.0555444	-2.53992	0.0110877	Brain_Hypothalamus
INTS6-AS1	13	51452364	51554678	0.0634227	-2.53856	0.0111308	Whole_Blood
ZKSCAN5	7	99504662	99534700	0.0841742	2.53771	0.0111579	Whole_Blood
DARS	2	135905881	135986100	0.0645552	-2.53383	0.0112824	Pituitary
MAPK6	15	51952106	52067375	0.0506443	2.53269	0.0113191	Thyroid
EXOSC7	3	44975241	45036066	0.0486348	-2.53231	0.0113314	Whole_Blood
GFPT2	5	180300698	180353336	0.0425744	-2.53194	0.0113432	Thyroid
C8orf74	8	10672628	10700590	0.0245941	-2.5319	0.0113446	Pituitary
CDCA4	14	105009573	105021083	0.0544762	2.53184	0.0113465	Thyroid
L3MBTL4	18	5954706	6415237	0.0558944	-2.5296	0.0114194	Whole_Blood
TMEM179B	11	62787402	62790400	0.0384745	-2.52929	0.0114294	Pituitary
ARL4D	17	43398993	43401137	0.0328297	2.52921	0.0114318	Pituitary
TNFRSF10A-AS1	8	23189279	23190675	0.0127567	2.52858	0.0114526	Whole_Blood
NINJ2	12	564296	663589	0.0545376	-2.52793	0.0114738	Brain_Hypothalamus
RAD23B	9	107283137	107332192	0.0249066	-2.52641	0.0115235	Thyroid
HOXA3	7	27106184	27152583	0.0141312	-2.52591	0.01154	Thyroid
BTBD16	10	122271296	122338159	0.623364	2.52544	0.0115554	Thyroid
PDK2	17	50094737	50112152	0.413182	2.52502	0.0115693	Thyroid
CEND1	11	787115	790113	0.021616	2.52488	0.0115739	Whole_Blood
CACNB3	12	48813794	48828941	0.130729	2.52435	0.0115912	Brain_Hypothalamus
S100B	21	46598604	46605208	0.426751	2.52422	0.0115957	Whole_Blood
PIP4K2C	12	57591174	57603418	0.0343534	-2.52311	0.0116321	Whole_Blood
CCT4	2	61868085	61888671	0.0329734	-2.52247	0.0116533	Thyroid
LLPH-DT	12	66130751	66134449	0.455807	-2.52226	0.0116602	Brain_Hypothalamus
PLPP7	9	131289459	131359022	0.0554732	2.5222	0.0116623	Thyroid
SRP14-AS1	15	40039242	40080614	0.171149	2.52179	0.011676	Whole_Blood
MMP25-AS1	16	3037400	3059370	0.0344719	-2.52113	0.0116978	Thyroid
SCP2	1	52927276	53051698	0.146702	2.5191	0.0117656	Whole_Blood
IQCE	7	2558972	2614733	0.0653835	-2.51903	0.0117678	Thyroid
DLST	14	74881891	74903743	0.03578	-2.51869	0.0117793	Pituitary
NCR3LG1	11	17351800	17377341	0.0969094	2.5186	0.0117821	Thyroid
LRAT	4	154626945	154753120	0.0152899	2.51821	0.0117953	Thyroid
DMAC1	9	7796500	7888380	0.0136487	2.51732	0.0118252	Whole_Blood
DHX35	20	38962299	39039723	0.0735418	2.51688	0.01184	Brain_Hypothalamus
AP3M1	10	74120255	74150842	0.0177517	2.51548	0.011887	Pituitary
RERE	1	8352397	8848921	0.265874	-2.51256	0.011986	Whole_Blood
EBF4	20	2692780	2760108	0.0812284	2.51226	0.0119961	Thyroid
MAP3K20	2	173075435	173268015	0.0344969	2.51185	0.01201	Whole_Blood
PTPRO	12	15322257	15602175	0.0268907	-2.51106	0.0120368	Whole_Blood
MCM4	8	47960185	47978160	0.162966	2.51062	0.0120519	Brain_Hypothalamus
USP22	17	20999596	21043760	0.125249	-2.5104	0.0120596	Whole_Blood
TUBA1C	12	49188736	49274600	0.0811438	2.51022	0.0120656	Thyroid
CAV2	7	116287380	116508541	0.0284399	-2.50963	0.0120857	Brain_Hypothalamus
PPIG	2	169584342	169641406	0.0808909	2.50711	0.0121723	Whole_Blood
PSMD9	12	121888732	121918297	0.0529431	2.50697	0.012177	Whole_Blood
TSC22D2	3	150408298	150466422	0.0102631	-2.50536	0.0122328	Thyroid
YPEL3	16	30092314	30096915	0.0375646	2.50441	0.0122656	Brain_Hypothalamus
PRKCZ	1	2050411	2185395	0.0528303	-2.50436	0.0122675	Pituitary
SAMD3	6	130144315	130365425	0.125054	2.50434	0.0122682	Whole_Blood
SLC45A4	8	141207166	141308305	0.0604756	-2.5039	0.0122833	Brain_Hypothalamus
COL27A1	9	114155537	114312511	0.0178155	2.50325	0.0123057	Whole_Blood
CAPZB	1	19338775	19485539	0.297452	-2.50258	0.012329	Thyroid
NPTXR	22	38818452	38844028	0.0347817	-2.50143	0.0123691	Brain_Hypothalamus
GCC2-AS1	2	108507515	108534196	0.0593008	2.50052	0.0124012	Pituitary
COPS6	7	100088969	100092187	0.089549	2.4986	0.0124685	Whole_Blood
RTEL1	20	63657810	63696253	0.0634388	2.49557	0.0125755	Thyroid
USP30	12	109023089	109088023	0.126764	-2.49165	0.0127152	Whole_Blood
FDX1	11	110429948	110464884	0.0873001	2.4916	0.0127171	Whole_Blood
ABR	17	1003519	1229738	0.0725415	2.49112	0.0127342	Thyroid
HABP4	9	96450169	96491336	0.0325906	-2.49044	0.0127585	Pituitary
PBRM1	3	52545352	52685917	0.0265371	2.49009	0.0127711	Pituitary
CNPY3	6	42929480	42939294	0.0197406	-2.48992	0.012777	Pituitary
ZNF213-AS1	16	3100696	3143734	0.351968	-2.4898	0.0127814	Brain_Hypothalamus
KIF5B	10	32009015	32056425	0.0297046	-2.48921	0.0128026	Pituitary
RAB11FIP1	8	37858618	37899497	0.0224256	-2.48835	0.0128337	Thyroid
PSORS1C2	6	31137534	31139066	0.618575	2.48771	0.0128569	Thyroid
CHAC2	2	53767804	53775196	0.0139184	-2.48647	0.0129017	Whole_Blood
DOC2A	16	30005514	30023270	0.0389109	-2.48468	0.0129668	Thyroid
LIMS2	2	127638381	127681786	0.151331	2.48431	0.0129801	Whole_Blood
MIR1250	17	81133196	81133308	0.0294609	2.48423	0.0129831	Pituitary
RHEB	7	151466012	151520120	0.0191809	-2.4834	0.0130136	Whole_Blood
BEST4	1	44783585	44788170	0.104833	2.48318	0.0130215	Thyroid
NACC1	19	13116862	13141147	0.0300643	-2.48255	0.0130446	Whole_Blood
PPP1R21	2	48440598	48515391	0.539325	-2.48121	0.0130936	Thyroid
VPS37C	11	61130257	61161615	0.0173987	2.48039	0.0131238	Thyroid
GMIP	19	19629476	19643657	0.0343976	-2.47844	0.0131959	Brain_Hypothalamus
RABIF	1	202878282	202889149	0.0111963	-2.47805	0.0132102	Thyroid
EXOC6	10	92826831	93059493	0.0398843	2.47711	0.013245	Pituitary
RPL7L1	6	42879616	42889925	0.0836972	-2.47689	0.0132534	Thyroid
NDUFS2	1	161197104	161214723	0.0691715	2.47683	0.0132556	Thyroid
TM4SF4	3	149474697	149503394	0.0706234	-2.47665	0.0132623	Thyroid
PLCB4	20	9067825	9504593	0.0503413	-2.47626	0.0132768	Thyroid
SPTLC1	9	92000087	92115413	0.102926	2.47557	0.0133022	Thyroid
CNTN3	3	74262568	74614659	0.0101375	-2.4754	0.0133085	Thyroid
APBB2	4	40810027	41216714	0.0713926	2.47532	0.0133116	Whole_Blood
CXCR2	2	218125289	218137251	0.0816916	2.47467	0.0133358	Whole_Blood
PARP11	12	3791047	3873448	0.13809	-2.47327	0.0133884	Pituitary
MDGA2	14	46840092	47675605	0.0659239	2.47316	0.0133924	Brain_Hypothalamus
LUNAR1	15	99014526	99031054	0.0923546	-2.47308	0.0133953	Whole_Blood
RSAD1	17	50478860	50485974	0.0592543	2.47281	0.0134055	Thyroid
ZNF510	9	96754553	96778129	0.0177429	2.47257	0.0134146	Thyroid
HACD3	15	65530418	65578349	0.0395185	-2.47253	0.0134162	Whole_Blood
PIM3	22	49960768	49964072	0.0414572	-2.47153	0.0134535	Thyroid
MTMR3	22	29883169	30030868	0.174817	-2.46987	0.0135164	Thyroid
FTSJ3	17	63819433	63830012	0.245143	-2.46976	0.0135204	Whole_Blood
SLC2A12	6	133987581	134052624	0.103494	-2.46972	0.013522	Brain_Hypothalamus
TMEM107	17	8172457	8176399	0.0178576	2.46918	0.0135421	Whole_Blood
ESYT2	7	158730995	158830253	0.168857	-2.46791	0.0135905	Thyroid
SCN2B	11	118162806	118176639	0.0863643	2.46725	0.0136156	Thyroid
RNPS1	16	2253116	2268397	0.0853519	2.46612	0.0136587	Thyroid
CAPN8	1	223538007	223665723	0.20218	-2.46525	0.0136917	Thyroid
SNX22	15	64151715	64157481	0.0149009	-2.46475	0.0137108	Thyroid
MMP21	10	125753580	125775821	0.0586621	2.46334	0.013765	Thyroid
IDUA	4	986997	1004564	0.175811	2.46301	0.0137777	Whole_Blood
FAT1	4	186587794	186726722	0.0379123	-2.46271	0.0137893	Pituitary
PRKCE	2	45651345	46187990	0.0654875	-2.46072	0.013866	Whole_Blood
GOLGA6L9	15	82429816	82439153	0.343174	2.46021	0.0138854	Thyroid
LINC02139	16	85137150	85149443	0.0247391	2.45991	0.0138974	Brain_Hypothalamus
PMF1	1	156212993	156240042	0.0298926	-2.4594	0.013917	Whole_Blood
TTC28	22	27978014	28679840	0.0431772	-2.45929	0.0139212	Thyroid
COPZ1	12	54301202	54351846	0.0248536	2.45872	0.0139432	Brain_Hypothalamus
WDR82	3	52254434	52288020	0.0275255	2.4582	0.0139636	Thyroid
TRPV6	7	142871208	142885745	0.0464863	-2.45798	0.0139719	Thyroid
SFRP1	8	41261962	41309473	0.0219825	2.45698	0.0140112	Pituitary
SSTR3	22	37204237	37212477	0.0246402	2.45676	0.0140198	Pituitary
LINC00304	16	89159146	89164245	0.106573	-2.45623	0.0140404	Thyroid
CDK12	17	39461486	39567559	0.0107091	-2.45614	0.014044	Thyroid
SGPP2	2	222424543	222562621	0.0404027	2.45599	0.0140496	Pituitary
RFX2	19	5993164	6199572	0.0476803	2.45587	0.0140544	Brain_Hypothalamus
STARD4	5	111496033	111512590	0.0128991	-2.45541	0.0140724	Whole_Blood
ZC3H15	2	186486253	186509361	0.046692	-2.45524	0.0140791	Whole_Blood
S100A12	1	153373711	153375621	0.249734	-2.45513	0.0140835	Whole_Blood
GATC	12	120446444	120463749	0.369693	2.45484	0.0140946	Thyroid
LINC01748	1	60515716	60640507	0.054673	-2.4546	0.0141043	Brain_Hypothalamus
ATIC	2	215311956	215349773	0.303974	2.45428	0.0141165	Brain_Hypothalamus
SLC16A4	1	110362851	110391082	0.0347527	2.45405	0.0141258	Thyroid
KLHL8	4	87160103	87240314	0.021558	2.4533	0.0141551	Pituitary
MCHR1	22	40679273	40682812	0.0503965	2.45269	0.0141793	Whole_Blood
GLI3	7	41960949	42264100	0.0806126	-2.45191	0.0142101	Thyroid
PRMT2	21	46635595	46665124	0.405789	2.45139	0.0142307	Whole_Blood
CFAP36	2	55519604	55545079	0.0410959	2.45123	0.0142368	Pituitary
DNAJB11	3	186567403	186585800	0.0183023	2.45118	0.0142389	Whole_Blood
CGNL1	15	57375967	57550717	0.171371	2.45046	0.0142675	Thyroid
NCLN	19	3185563	3209575	0.244133	2.44963	0.0143004	Pituitary
ARPC1A	7	99325898	99366262	0.089522	-2.44939	0.0143099	Thyroid
ADNP2	18	80109262	80147523	0.0436135	-2.44908	0.0143221	Brain_Hypothalamus
ZPBP	7	49850421	50121329	0.080096	-2.44854	0.0143437	Thyroid
AP3B2	15	82659281	82710112	0.409759	2.44809	0.0143617	Thyroid
AGPAT1	6	32168212	32178096	0.0321829	2.4477	0.0143771	Thyroid
CCDC15	11	124954121	125041489	0.17412	-2.44713	0.0144001	Whole_Blood
FAM106A	17	18511221	18551705	0.400818	2.44573	0.0144558	Brain_Hypothalamus
SORBS3	8	22544986	22575788	0.0827467	2.44565	0.014459	Pituitary
PWP1	12	107685799	107713162	0.176601	2.44557	0.0144623	Whole_Blood
SKAP2	7	26667068	26995239	0.509347	-2.44524	0.0144755	Whole_Blood
BRMS1	11	66337333	66345125	0.0221232	-2.44386	0.0145312	Thyroid
ZMAT2	5	140698680	140706686	0.0256904	2.44296	0.0145672	Whole_Blood
SLC23A3	2	219161465	219170095	0.245119	2.44196	0.0146078	Whole_Blood
FAM81A	15	59372693	59523555	0.0347465	2.44149	0.0146268	Brain_Hypothalamus
CSH2	17	63872012	63873766	0.0225935	2.44064	0.0146614	Pituitary
LINC00092	9	96019724	96027993	0.0132056	-2.44055	0.014665	Whole_Blood
TMEM42	3	44861904	44865670	0.0524608	2.4393	0.0147157	Thyroid
MZF1	19	58561931	58573575	0.0237267	2.43923	0.0147186	Pituitary
TAL2	9	105662457	105663124	0.0665819	-2.43833	0.0147552	Brain_Hypothalamus
NUDT3	6	34279679	34392669	0.0184297	-2.43822	0.0147599	Thyroid
STX11	6	144150487	144191939	0.0155462	2.43733	0.0147964	Thyroid
CSE1L	20	49046246	49096960	0.0367959	2.43633	0.0148372	Whole_Blood
UBA3	3	69054730	69080408	0.015869	2.43601	0.0148501	Whole_Blood
INTU	4	127623271	127726737	0.0396976	-2.43591	0.0148542	Pituitary
PLCH1	3	155375580	155745071	0.0713455	2.43561	0.0148668	Brain_Hypothalamus
RXFP2	13	31739526	31803389	0.0331733	2.43525	0.0148815	Thyroid
RCSD1	1	167630093	167708696	0.117473	-2.43374	0.0149438	Thyroid
KLRC3	12	10412315	10420595	0.0424565	-2.43358	0.0149505	Thyroid
ZP1	11	60867542	60875693	0.0749899	-2.43184	0.0150223	Pituitary
SGIP1	1	66533267	66751139	0.174004	2.43029	0.0150866	Whole_Blood
UBE2O	17	76389456	76453152	0.0111963	2.42988	0.0151039	Thyroid
S100A13	1	153618787	153631360	0.0725399	2.42939	0.0151243	Pituitary
RHPN2	19	32978592	33064888	0.213458	2.42917	0.0151335	Brain_Hypothalamus
RANBP6	9	6011025	6015625	0.0124413	-2.42831	0.0151694	Whole_Blood
TRAF3IP3	1	209756032	209782320	0.0281814	-2.42819	0.0151743	Thyroid
SAXO2	15	82262810	82284930	0.305829	-2.42782	0.0151897	Brain_Hypothalamus
JAG2	14	105140982	105168824	0.0260465	2.42725	0.0152137	Brain_Hypothalamus
MIIP	1	12019466	12032045	0.067042	-2.42413	0.0153449	Thyroid
MMP9	20	46008908	46016561	0.0114727	-2.4225	0.0154143	Thyroid
RASL10A	22	29312933	29319679	0.0398639	-2.42194	0.0154378	Brain_Hypothalamus
MLC1	22	50059391	50085426	0.0434834	-2.42191	0.0154391	Thyroid
PLIN5	19	4522531	4535224	0.0648749	2.42172	0.0154472	Whole_Blood
PSMC5	17	63827152	63832026	0.100704	-2.42168	0.015449	Thyroid
DDX42	17	63773603	63819317	0.176567	2.42108	0.0154746	Whole_Blood
CDH10	5	24487100	24644978	0.047208	-2.41964	0.015536	Pituitary
ARHGEF7-AS2	13	111113812	111115678	0.0317812	-2.41808	0.0156028	Thyroid
SELENON	1	25800193	25818221	0.0360031	2.41802	0.0156054	Pituitary
ACSL6	5	131949973	132012243	0.0628321	2.41785	0.0156124	Whole_Blood
OSBPL3	7	24796540	24981634	0.184783	2.41776	0.0156166	Pituitary
B3GALT4	6	33277123	33284832	0.0344439	2.41771	0.0156185	Pituitary
RPAP1	15	41517176	41544269	0.114453	-2.41736	0.0156336	Whole_Blood
KLHL3	5	137617500	137736089	0.0332572	-2.41655	0.0156684	Whole_Blood
PAPLN	14	73237497	73274640	0.0979611	2.41652	0.0156697	Thyroid
CD163L1	12	7346685	7479897	0.0184031	-2.41578	0.0157016	Whole_Blood
GRB7	17	39737927	39747291	0.0156296	2.41466	0.0157501	Thyroid
RAB11A	15	65726054	65891989	0.0183058	-2.41431	0.015765	Pituitary
SPTBN4	19	40466241	40576464	0.179535	2.41364	0.0157942	Brain_Hypothalamus
SNED1	2	240998618	241095568	0.0795096	-2.41347	0.0158014	Thyroid
NCOR1	17	16029065	16218185	0.170425	-2.41336	0.015806	Whole_Blood
P2RY12	3	151336843	151384753	0.128907	-2.41334	0.0158069	Thyroid
LINC02723	11	64394342	64395831	0.239758	2.41332	0.0158078	Whole_Blood
ICA1	7	8113184	8262687	0.0911449	-2.41284	0.0158287	Brain_Hypothalamus
ARHGEF26	3	154121003	154257827	0.16958	2.41204	0.0158636	Thyroid
COMMD9	11	36269284	36289449	0.023423	-2.41155	0.015885	Thyroid
CNNM2	10	102918294	103090222	0.0546415	-2.41114	0.0159025	Brain_Hypothalamus
RBM11	21	14216130	14228372	0.138266	2.41039	0.0159356	Brain_Hypothalamus
IRF1	5	132440440	132508719	0.0119149	-2.41019	0.0159441	Thyroid
ASAH2	10	50182778	50279720	0.363079	2.40839	0.016023	Brain_Hypothalamus
LINC02308	14	81441987	81450371	0.0124795	-2.40838	0.0160235	Thyroid
ATP4A	19	35550031	35563658	0.118147	-2.40816	0.0160333	Thyroid
RAB44	6	36697826	36733184	0.0234921	-2.40796	0.0160419	Pituitary
MYO1E	15	59132434	59372871	0.0120478	-2.40683	0.0160918	Thyroid
TRAF3IP2-AS1	6	111483459	111598783	0.174884	2.40668	0.0160984	Brain_Hypothalamus
PNPLA1	6	36243203	36313955	0.0166159	2.40653	0.0161047	Thyroid
MINK1	17	4833340	4898061	0.038909	2.40629	0.0161153	Brain_Hypothalamus
SURF2	9	133356550	133361158	0.0184887	2.40619	0.0161198	Thyroid
GOSR2	17	46923075	46975524	0.0981344	-2.40615	0.0161217	Brain_Hypothalamus
LINC01914	2	41931599	41934660	0.0115469	-2.40571	0.016141	Thyroid
KDSR	18	63327726	63367228	0.0473756	2.40461	0.0161899	Brain_Hypothalamus
POLR3D	8	22245133	22254601	0.016691	-2.40441	0.0161984	Thyroid
HLA-DMB	6	32934629	32941028	0.0543892	-2.40429	0.016204	Pituitary
TLCD3B	16	30024427	30052978	0.0110603	-2.40378	0.0162267	Thyroid
RBBP9	20	18486540	18497225	0.0967552	-2.40341	0.016243	Brain_Hypothalamus
DDX50	10	68901286	68946847	0.0231081	-2.40238	0.0162889	Thyroid
LINC01359	1	64972225	65002489	0.0271068	2.4009	0.0163547	Brain_Hypothalamus
NPR2	9	35791003	35809732	0.255052	2.4007	0.0163639	Thyroid
ABCB4	7	87401696	87480435	0.0498689	-2.39931	0.016426	Thyroid
HNRNPA1L2	13	52642431	52643773	0.241957	2.39897	0.0164412	Thyroid
WDR81	17	1716523	1738599	0.0957297	-2.39883	0.0164476	Thyroid
GSDMA	17	39953263	39977768	0.299206	-2.39862	0.0164572	Thyroid
SIRT4	12	120302316	120313249	0.0592365	2.39761	0.0165026	Thyroid
GLI2	2	120735623	120992653	0.0422433	-2.39752	0.0165065	Pituitary
ADAL	15	43330672	43354569	0.479396	2.39702	0.016529	Thyroid
DSP	6	7541338	7586714	0.0457425	2.39669	0.0165441	Thyroid
NR2E3	15	71792638	71818259	0.0275034	-2.39636	0.0165588	Thyroid
DEPDC5	22	31753867	31908033	0.111271	2.39509	0.0166163	Pituitary
STOML1	15	73978926	73994622	0.21343	2.39497	0.0166217	Whole_Blood
HSCB	22	28742039	28757515	0.0574983	-2.39473	0.0166328	Thyroid
CHKB-DT	22	50583026	50595634	0.199438	-2.39467	0.0166354	Brain_Hypothalamus
GPATCH4	1	156594301	156601496	0.10586	-2.39462	0.0166375	Brain_Hypothalamus
RRP15	1	218285293	218337983	0.311368	2.39387	0.0166715	Pituitary
CIAO2A	15	64072565	64093857	0.0233733	2.39369	0.01668	Pituitary
DPF3	14	72609034	72894101	0.028828	-2.39304	0.0167096	Thyroid
LARP1B	4	128061286	128222931	0.0278768	2.39256	0.0167314	Pituitary
CS	12	56271699	56300391	0.0206888	-2.39082	0.0168106	Pituitary
TCEANC2	1	54053584	54112519	0.0267152	-2.39043	0.0168285	Whole_Blood
ZNF503-AS2	10	75401519	75408982	0.0380642	2.38986	0.0168547	Whole_Blood
TFIP11	22	26491225	26512505	0.147636	-2.38946	0.0168731	Thyroid
EIF3B	7	2354086	2380745	0.0670748	2.3892	0.0168851	Brain_Hypothalamus
GPR132	14	105049395	105065445	0.330946	2.38897	0.0168956	Thyroid
TMEM222	1	27322145	27336400	0.0828976	-2.38786	0.0169467	Thyroid
VPS16	20	2840703	2866732	0.163032	2.38767	0.0169557	Thyroid
LINC00663	19	19757366	19776423	0.215569	-2.38687	0.0169924	Pituitary
TMEM225B	7	99598267	99611045	0.217914	2.38487	0.0170849	Thyroid
CUL1	7	148697914	148801110	0.020183	-2.38475	0.017091	Thyroid
AUNIP	1	25831913	25859458	0.0166614	-2.38448	0.0171034	Thyroid
CBR1	21	36069941	36073166	0.235495	-2.38134	0.0172499	Brain_Hypothalamus
CGREF1	2	27098889	27119128	0.0260333	2.38124	0.0172545	Brain_Hypothalamus
LEPROT	1	65420587	65436007	0.480304	2.38106	0.0172629	Whole_Blood
LSAMP	3	115802374	117139389	0.0308707	2.38076	0.0172768	Thyroid
ORMDL3	17	39921041	39927601	0.331593	2.38043	0.0172926	Whole_Blood
HSPA4	5	133052013	133106449	0.0956807	2.37868	0.0173747	Whole_Blood
DDOST	1	20651767	20661544	0.0557645	-2.37832	0.0173915	Thyroid
LIMK2	22	31212239	31280080	0.0909915	-2.37802	0.0174058	Thyroid
RHPN1	8	143368876	143384221	0.123947	-2.3779	0.0174115	Whole_Blood
CNN1	19	11538767	11550323	0.0626783	2.37774	0.017419	Brain_Hypothalamus
HSD11B2	16	67430652	67437553	0.0734695	2.37715	0.017447	Thyroid
HOMER3	19	18929201	18941261	0.0696411	2.37647	0.0174794	Brain_Hypothalamus
PANK2	20	3888839	3929887	0.0821198	-2.37613	0.0174954	Thyroid
NAT1	8	18170477	18223689	0.0354812	2.37599	0.0175019	Whole_Blood
AAAS	12	53307456	53324864	0.0221614	-2.37545	0.0175274	Pituitary
EFCAB2	1	244969682	245127164	0.17605	-2.37529	0.0175351	Whole_Blood
CRCP	7	66114604	66154568	0.186629	-2.3746	0.0175678	Brain_Hypothalamus
MALAT1	11	65497640	65508073	0.0342877	2.37441	0.017577	Thyroid
SECISBP2	9	89318500	89359663	0.0505506	2.37312	0.0176384	Thyroid
MAN1A1	6	119177205	119349761	0.0841877	-2.37217	0.0176839	Whole_Blood
SEPTIN8	5	132750819	132807241	0.0804323	2.37214	0.0176855	Thyroid
LTB4R2	14	24305734	24312053	0.0247302	-2.37038	0.0177696	Whole_Blood
COX6A1	12	120438090	120440737	0.0655768	2.36924	0.0178245	Pituitary
PDSS2	6	107152562	107459564	0.0186889	-2.36816	0.0178768	Whole_Blood
PPOX	1	161166056	161178013	0.0196171	2.36808	0.0178807	Whole_Blood
OTOS	2	240139026	240144562	0.125067	-2.36782	0.0178935	Pituitary
SMYD4	17	1779485	1830634	0.333872	-2.36663	0.0179509	Brain_Hypothalamus
RPUSD2	15	40569299	40574949	0.0163951	-2.36602	0.0179803	Thyroid
MTMR7	8	17296794	17413528	0.283152	2.36565	0.0179984	Thyroid
MBTD1	17	51177425	51260163	0.0244557	2.36556	0.0180029	Whole_Blood
UBE2N	12	93405673	93441947	0.0330176	-2.36545	0.018008	Brain_Hypothalamus
NUDT7	16	77722492	77742260	0.156778	2.36504	0.018028	Brain_Hypothalamus
HMGA2	12	65824460	65966291	0.0142145	2.36343	0.0181068	Thyroid
CPPED1	16	12659799	12803887	0.17071	2.36331	0.0181124	Thyroid
WASHC4	12	105107324	105169130	0.0769677	-2.36281	0.0181372	Whole_Blood
TMEM87B	2	112055269	112119318	0.262151	-2.36132	0.01821	Whole_Blood
SCD	10	100347233	100364826	0.0352297	-2.36094	0.0182287	Brain_Hypothalamus
ACAD8	11	134253548	134265855	0.0183221	-2.35976	0.0182867	Pituitary
RBM23	14	22893204	22919182	0.264184	-2.35957	0.0182959	Pituitary
DCAF4L1	4	41981756	41986465	0.0304159	-2.35925	0.0183118	Brain_Hypothalamus
STYK1	12	10618923	10674318	0.0356367	-2.35922	0.0183133	Whole_Blood
IRX6	16	55324203	55330756	0.0208911	-2.35906	0.0183213	Pituitary
RRM2B	8	102204502	102238961	0.0418893	2.35812	0.018368	Whole_Blood
PCDHGB5	5	141397947	141512975	0.0210541	-2.3581	0.0183687	Thyroid
FSCN2	17	81528377	81537130	0.208816	-2.35693	0.0184269	Thyroid
ARMC6	19	19033575	19060311	0.117261	2.35654	0.0184459	Thyroid
NEK9	14	75079353	75127344	0.092562	2.356	0.0184731	Brain_Hypothalamus
FDXR	17	74862497	74873031	0.0810873	2.35568	0.0184889	Thyroid
RASGRP3	2	33436324	33564750	0.269428	-2.35555	0.0184953	Pituitary
MARC2	8	933995	953868	0.119991	2.35541	0.0185023	Whole_Blood
ST6GALNAC4	9	127907886	127917041	0.0469477	-2.35507	0.0185191	Thyroid
EFCAB10	7	105565120	105600875	0.0554296	2.35463	0.0185411	Pituitary
TRPV1	17	3565444	3609411	0.0533486	-2.35231	0.018657	Whole_Blood
GPBAR1	2	218259496	218263861	0.0320847	2.35182	0.0186817	Thyroid
IQUB	7	123452193	123535077	0.0612393	2.35169	0.0186882	Thyroid
TMEM185B	2	120217479	120223400	0.0666987	-2.35159	0.0186936	Thyroid
MAP3K7	6	90513573	90587086	0.048437	2.35157	0.0186945	Whole_Blood
ZNF274	19	58183029	58213562	0.0316452	-2.35147	0.0186992	Thyroid
PRDX2	19	12796820	12801800	0.0382255	-2.35137	0.0187044	Thyroid
ZC3H11B	1	219608012	219613105	0.0341344	-2.35111	0.0187176	Pituitary
XPA	9	97674909	97697340	0.140082	2.35086	0.0187298	Thyroid
KLHL11	17	41848518	41865423	0.0641605	-2.34998	0.0187742	Brain_Hypothalamus
MEIS3	19	47403124	47419527	0.109242	-2.34955	0.0187959	Pituitary
OMA1	1	58415384	58546802	0.126224	2.34938	0.0188049	Brain_Hypothalamus
SNX1	15	64094123	64146090	0.0557876	-2.34746	0.0189019	Thyroid
PCDH10	4	133149294	133208606	0.0103638	2.34735	0.0189074	Thyroid
TTC12	11	113314579	113383544	0.461695	2.34721	0.0189144	Brain_Hypothalamus
ARHGEF40	14	21070273	21090248	0.0274077	-2.34583	0.0189846	Whole_Blood
SILC1	2	5932543	6003510	0.0484725	2.3457	0.0189912	Brain_Hypothalamus
FBXO27	19	38990714	39032785	0.365849	2.34538	0.0190079	Pituitary
ATF1	12	50763710	50821162	0.0213487	-2.34505	0.0190246	Thyroid
FUT2	19	48695971	48705951	0.0640541	2.34472	0.0190412	Brain_Hypothalamus
EIF2B3	1	44850522	44986722	0.0659722	2.34471	0.0190419	Brain_Hypothalamus
GCN1	12	120127202	120194715	0.172662	-2.34471	0.0190421	Thyroid
CCND2-AS1	12	4247981	4276252	0.0319551	-2.3432	0.0191191	Thyroid
SCYL1	11	65525077	65538704	0.0187094	2.34266	0.0191468	Whole_Blood
LINC01123	2	109987063	109996140	0.24013	-2.34253	0.0191535	Thyroid
USF1	1	161039251	161045977	0.0303881	2.34238	0.0191613	Brain_Hypothalamus
SPINT2	19	38244035	38292615	0.0571762	2.34164	0.0191992	Pituitary
GK5	3	142157527	142225592	0.112242	2.34164	0.0191993	Thyroid
AMOTL1	11	94706431	94876748	0.0603115	-2.34113	0.0192256	Brain_Hypothalamus
POP5	12	120578764	120581402	0.116274	2.34099	0.0192324	Thyroid
FCRL5	1	157513377	157552515	0.375868	2.34075	0.0192452	Whole_Blood
DSCC1	8	119833976	119855894	0.447439	2.34048	0.0192589	Thyroid
NKD2	5	1008802	1038943	0.171366	2.33912	0.0193293	Brain_Hypothalamus
CCDC173	2	169645425	169694405	0.148375	2.33888	0.0193419	Brain_Hypothalamus
HOXA10	7	27170605	27180261	0.0389431	-2.33802	0.0193863	Whole_Blood
RNF122	8	33547754	33567128	0.0324609	-2.3369	0.0194442	Whole_Blood
NR3C2	4	148078762	148444698	0.28032	-2.33651	0.0194645	Thyroid
PARP1	1	226360210	226408154	0.0373367	2.33585	0.0194993	Whole_Blood
ATAD5	17	30831966	30895869	0.0280157	2.3356	0.0195119	Brain_Hypothalamus
PRELP	1	203475806	203491352	0.0419599	2.33351	0.0196214	Pituitary
GLCCI1	7	7968796	8094272	0.262998	2.33323	0.0196361	Thyroid
PCP4L1	1	161258745	161285450	0.0443589	-2.33313	0.0196415	Thyroid
AGL	1	99850361	99924023	0.0967034	2.3329	0.0196535	Thyroid
CDON	11	125955796	126063335	0.10157	2.33252	0.0196735	Pituitary
HINT1	5	131155383	131224468	0.0538837	2.3322	0.0196899	Thyroid
PKD1L3	16	71929538	72000402	0.0509562	2.33189	0.0197063	Thyroid
DNAJC13	3	132417502	132539032	0.0141234	-2.33015	0.0197983	Whole_Blood
BCCIP	10	125823546	125853695	0.0298439	-2.33003	0.0198046	Thyroid
ZBTB12	6	31899613	31902086	0.305417	2.33	0.0198063	Whole_Blood
PRPH2	6	42696598	42722597	0.0817418	2.32962	0.0198262	Whole_Blood
MAP3K11	11	65597756	65615382	0.322398	2.32932	0.0198419	Thyroid
LEF1	4	108047545	108168956	0.0424611	2.32891	0.019864	Brain_Hypothalamus
CWC15	11	94962620	94973586	0.0802037	-2.32878	0.0198709	Brain_Hypothalamus
NPR1	1	153678688	153693992	0.0328225	-2.32875	0.0198721	Thyroid
PLOD1	1	11934205	11975538	0.351232	2.32875	0.0198726	Whole_Blood
EPS15	1	51354263	51519328	0.0263991	2.32842	0.0198897	Brain_Hypothalamus
LINC02328	14	85911438	86161539	0.023719	-2.32804	0.01991	Whole_Blood
GNA12	7	2728105	2844308	0.0340905	-2.32802	0.019911	Thyroid
MHENCR	20	63627179	63628824	0.0364324	2.32743	0.0199426	Whole_Blood
DDX55	12	123602077	123620943	0.338543	2.32695	0.0199677	Thyroid
RBFOX3	17	79089345	79611051	0.0101076	-2.32642	0.019996	Whole_Blood
CD68	17	7579491	7582111	0.0357455	-2.32488	0.0200786	Pituitary
CHST13	3	126524155	126543291	0.543302	-2.32352	0.0201512	Whole_Blood
GTF3C5	9	133030675	133058503	0.0289914	2.32349	0.020153	Brain_Hypothalamus
PIP5KL1	9	127920881	127930785	0.0378257	-2.32338	0.0201588	Brain_Hypothalamus
EIF4EBP3	5	140547662	140549576	0.07725	-2.32288	0.0201854	Thyroid
BRD7	16	50313487	50368988	0.345992	-2.32284	0.0201879	Whole_Blood
HSD3B7	16	30985207	30989147	0.0692604	-2.32214	0.0202253	Whole_Blood
BCL7C	16	30833626	30894302	0.0253027	2.32115	0.0202789	Thyroid
ST6GALNAC2	17	76565377	76586956	0.0489457	2.32105	0.0202842	Brain_Hypothalamus
C11orf68	11	65916810	65919062	0.0114602	2.32023	0.0203283	Whole_Blood
ORM1	9	114323098	114326479	0.242504	2.31899	0.0203954	Whole_Blood
TWF1	12	43793723	43806328	0.107662	-2.31876	0.0204079	Whole_Blood
ADGRA3	4	22345071	22516066	0.222747	-2.31826	0.0204354	Thyroid
SEPTIN7-AS1	7	35751856	35800949	0.0142471	-2.31773	0.020464	Whole_Blood
ASIC3	7	151048292	151052756	0.0480266	-2.31748	0.0204777	Brain_Hypothalamus
CORO6	17	29614756	29622912	0.0739905	-2.31741	0.0204813	Brain_Hypothalamus
CAMKV	3	49857988	49869935	0.0111328	-2.31735	0.0204849	Thyroid
C6orf163	6	87344813	87365463	0.265472	-2.31694	0.0205067	Thyroid
HOXA-AS2	7	27107777	27134302	0.223502	-2.31669	0.0205207	Whole_Blood
PTCD1	7	99416739	99466163	0.0217186	2.3163	0.0205418	Thyroid
YTHDF3	8	63168553	63212786	0.0173098	-2.31502	0.020612	Whole_Blood
PSORS1C1	6	31114750	31140092	0.140951	2.31449	0.0206406	Pituitary
GOLGA7	8	41488200	41511095	0.112579	2.31417	0.0206583	Brain_Hypothalamus
COX11	17	54951902	54968703	0.0369553	-2.31368	0.0206852	Whole_Blood
TRUB1	10	114938195	114977676	0.144986	2.31358	0.0206908	Thyroid
SNTG2-AS1	2	949257	951502	0.0365127	2.31354	0.0206929	Whole_Blood
PRELID3B	20	59033145	59042809	0.0417733	2.3133	0.0207062	Pituitary
CARS	11	3000922	3057613	0.0548056	-2.31266	0.0207412	Whole_Blood
SOX7	8	10723768	10730511	0.0506684	2.31193	0.0207817	Thyroid
ZNF398	7	149126416	149183042	0.0207923	2.31187	0.020785	Pituitary
LINC02716	11	45771416	45773295	0.19704	2.3116	0.0207995	Brain_Hypothalamus
ZNF234	19	44141554	44160313	0.0293939	2.31118	0.0208228	Brain_Hypothalamus
PPP2R5C	14	101761709	101927989	0.0881785	2.31049	0.0208612	Brain_Hypothalamus
SSH2	17	29625938	29930276	0.230832	2.31025	0.0208741	Thyroid
NT5E	6	85449584	85495791	0.227489	-2.30943	0.0209198	Whole_Blood
ZNF781	19	37668579	37676393	0.321876	-2.30912	0.0209367	Brain_Hypothalamus
COBLL1	2	164653624	164843679	0.0389611	-2.30884	0.0209527	Brain_Hypothalamus
SMO	7	129188633	129213545	0.064664	2.3088	0.0209544	Pituitary
GET4	7	876554	896436	0.0149726	2.30879	0.0209554	Thyroid
UTP6	17	31860904	31901708	0.0968256	-2.30836	0.0209789	Brain_Hypothalamus
ADCY3	2	24819169	24920237	0.0153717	-2.30742	0.0210317	Thyroid
HNRNPUL1	19	41262496	41307787	0.049055	-2.30721	0.021043	Brain_Hypothalamus
KRT23	17	40922700	40937646	0.572712	-2.30656	0.0210795	Pituitary
UCKL1-AS1	20	63953384	63956985	0.081361	-2.30629	0.0210943	Thyroid
COL11A2	6	33162681	33192499	0.0874349	2.30572	0.0211263	Brain_Hypothalamus
RAPGEFL1	17	40177010	40195656	0.0358624	-2.30411	0.0212162	Brain_Hypothalamus
NDUFA5	7	123536997	123557904	0.0186495	2.30395	0.0212255	Pituitary
SUN1	7	816615	896435	0.0202839	-2.30384	0.0212317	Whole_Blood
C6orf118	6	165279664	165309605	0.116804	-2.30289	0.0212852	Pituitary
SLC12A3	16	56865207	56915850	0.0628272	-2.30283	0.0212884	Brain_Hypothalamus
TCHP	12	109900264	109983841	0.0544517	-2.30268	0.0212966	Pituitary
KCNA3	1	110653560	110674940	0.0581207	2.30227	0.0213202	Thyroid
IFITM1	11	310041	315272	0.163627	-2.30178	0.0213475	Whole_Blood
TMED2-DT	12	123575891	123585115	0.0312077	2.30003	0.0214466	Whole_Blood
HSPA14	10	14838302	14846999	0.0273861	-2.29893	0.0215092	Brain_Hypothalamus
ACO1	9	32384603	32454769	0.0708588	-2.29858	0.0215288	Thyroid
RPS23	5	82273320	82278396	0.215283	2.29845	0.0215359	Whole_Blood
AKAP3	12	4615508	4649051	0.401804	2.29823	0.0215485	Brain_Hypothalamus
SCIN	7	12570577	12660182	0.377709	-2.2981	0.0215558	Thyroid
TERF1	8	73008856	73048123	0.0116284	-2.29797	0.0215636	Thyroid
CENPE	4	103105349	103198445	0.0441338	2.29718	0.0216086	Thyroid
PMAIP1	18	59899996	59904305	0.0584153	-2.29555	0.0217018	Thyroid
MCPH1	8	6406592	6648508	0.0139877	-2.29483	0.0217428	Thyroid
PROX2	14	74852871	74876154	0.0382401	-2.29468	0.0217517	Thyroid
ZNF530	19	57599885	57612722	0.0451827	2.29426	0.0217755	Pituitary
TMED2	12	123584533	123598582	0.0497911	-2.29422	0.0217781	Pituitary
HSPA6	1	161524540	161526894	0.0105443	-2.29421	0.0217783	Thyroid
CCDC102A	16	57512181	57536571	0.0466961	-2.29367	0.0218097	Whole_Blood
KCNJ8	12	21764955	21775600	0.0206173	2.29358	0.0218148	Thyroid
FBLL1	5	168529305	168530634	0.539019	-2.29326	0.0218333	Thyroid
PPP1R3C	10	91628442	91633071	0.0817341	-2.29202	0.0219043	Thyroid
GPR183	13	99294539	99307399	0.0441901	-2.2918	0.0219171	Brain_Hypothalamus
PCDHGB7	5	141417645	141512975	0.0168481	2.29172	0.0219219	Pituitary
PIK3R3	1	46040140	46133036	0.0361732	-2.29139	0.0219407	Whole_Blood
S100A9	1	153357854	153361023	0.122326	-2.29135	0.0219433	Whole_Blood
COX7A1	19	36150922	36152449	0.206492	2.29123	0.0219503	Pituitary
FRMD4A	10	13643706	14462142	0.0783046	-2.29026	0.0220061	Whole_Blood
MT1E	16	56625475	56627112	0.412396	-2.2899	0.0220268	Thyroid
MCM3AP	21	46235133	46286297	0.2115	-2.28989	0.0220276	Thyroid
PIGL	17	16217191	16351797	0.100078	-2.28944	0.0220538	Thyroid
MED12L	3	151085286	151437072	0.0121628	-2.2894	0.0220564	Thyroid
HLA-DMA	6	32948613	32969094	0.421281	-2.28924	0.0220655	Thyroid
SP3	2	173880850	173965373	0.0467942	2.28903	0.0220774	Thyroid
UQCRHL	1	15807169	15809348	0.0352542	-2.28834	0.0221177	Pituitary
NTMT1	9	129608884	129636135	0.0141627	-2.28794	0.0221412	Thyroid
ACTR1B	2	97655939	97664044	0.44383	2.28792	0.0221421	Thyroid
SNRPA	19	40750637	40765389	0.0164635	2.2876	0.0221608	Whole_Blood
ZNF33B	10	42574185	42638570	0.102414	2.28737	0.022174	Brain_Hypothalamus
CPE	4	165361194	165498547	0.0173844	2.28687	0.0222035	Thyroid
NEDD4	15	55826922	55993660	0.144256	2.28668	0.0222143	Thyroid
PLA2G2C	1	20161253	20186518	0.0217537	2.28642	0.0222296	Whole_Blood
FAM169A	5	74777574	74866966	0.0153456	-2.28577	0.0222675	Thyroid
NLRP1	17	5499415	5619424	0.032428	2.28575	0.022269	Brain_Hypothalamus
MOB3A	19	2071036	2096673	0.0234872	-2.2855	0.0222833	Brain_Hypothalamus
ACOT8	20	45841721	45857405	0.0190418	2.28435	0.0223511	Whole_Blood
ETAA1	2	67397322	67412089	0.0357589	2.28321	0.0224183	Pituitary
SLC46A3	13	28700064	28718970	0.136618	2.28306	0.0224267	Brain_Hypothalamus
DZANK1	20	18383367	18467281	0.265874	-2.28168	0.0225081	Pituitary
PPP1R14D	15	40815451	40828709	0.0211505	-2.28155	0.022516	Thyroid
DDX1	2	15591178	15634346	0.0741094	-2.28152	0.0225176	Whole_Blood
PTPN2	18	12785478	12929643	0.0360719	-2.28094	0.022552	Thyroid
TCIM	8	40153482	40155310	0.0367452	-2.28059	0.0225727	Brain_Hypothalamus
FRA10AC1	10	93667883	93702592	0.425817	-2.28039	0.0225848	Brain_Hypothalamus
LINC00578	3	177441910	177767379	0.0782367	2.28028	0.0225913	Thyroid
QDPR	4	17460261	17512206	0.446033	2.27993	0.0226118	Whole_Blood
IFT43	14	75902136	76084585	0.0213233	-2.27942	0.022642	Thyroid
PIGM	1	160024953	160031990	0.0598236	2.27872	0.0226837	Pituitary
MAP3K7CL	21	29077221	29175889	0.165092	-2.27867	0.0226866	Brain_Hypothalamus
CCNDBP1	15	43185118	43197177	0.0234337	2.27694	0.0227896	Thyroid
TULP2	19	48880965	48898744	0.0435682	2.27657	0.0228121	Pituitary
USP2-AS1	11	119356467	119659284	0.0126964	2.27633	0.0228261	Thyroid
UXS1	2	106093308	106194301	0.0190589	-2.2756	0.0228702	Whole_Blood
CENPS	1	10430433	10442808	0.240804	2.27549	0.0228765	Thyroid
FABP1	2	88122982	88128062	0.0738032	-2.27547	0.0228777	Pituitary
PRKCH	14	61187559	61550976	0.0173182	-2.2748	0.0229181	Thyroid
SCAMP4	19	1905214	1926013	0.0615813	2.27368	0.0229851	Whole_Blood
DGCR9	22	18970439	19031242	0.0717744	-2.27361	0.0229896	Pituitary
LINC00334	21	45234308	45264548	0.082785	-2.2727	0.023044	Thyroid
RAVER2	1	64745075	64833232	0.12894	2.27236	0.0230645	Thyroid
R3HDM1	2	135531455	135725270	0.015518	-2.27168	0.023106	Thyroid
ECE1	1	21217247	21345572	0.0255463	2.2711	0.0231408	Thyroid
TBC1D24	16	2475051	2509560	0.0531098	-2.2705	0.0231773	Whole_Blood
DPP8	15	65442463	65517704	0.029767	-2.27014	0.0231988	Thyroid
LINC-PINT	7	130791264	131110176	0.0349267	2.26986	0.0232161	Whole_Blood
RAB17	2	237574322	237601614	0.0566824	2.26969	0.0232263	Pituitary
ZNF317	19	9140397	9163424	0.070898	2.26878	0.0232817	Whole_Blood
KLHL10	17	41835685	41848384	0.34506	-2.268	0.0233294	Thyroid
GPR18	13	99254732	99261744	0.0248494	2.26698	0.0233914	Whole_Blood
PCDHGA3	5	141343829	141512975	0.0362535	-2.26595	0.0234547	Brain_Hypothalamus
C14orf93	14	22985894	23010166	0.0212176	-2.26539	0.0234889	Pituitary
ZNF710-AS1	15	90074512	90082207	0.0410181	2.26356	0.0236012	Pituitary
CIAO1	2	96266159	96274173	0.113214	2.26356	0.0236014	Pituitary
EMSY	11	76444923	76553031	0.037607	-2.26354	0.0236024	Thyroid
ABITRAM	9	108934400	108950744	0.0269886	-2.263	0.0236354	Thyroid
ZNF397	18	35241030	35267133	0.0392125	2.26256	0.0236631	Whole_Blood
KAT8	16	31114489	31131393	0.319417	2.26212	0.0236902	Thyroid
CACFD1	9	133459965	133470848	0.0706042	2.26205	0.0236946	Brain_Hypothalamus
SCGB2B2	19	34590644	34677159	0.0878623	-2.26191	0.023703	Thyroid
CYP3A5	7	99648194	99679996	0.0204669	2.26167	0.0237181	Thyroid
CHEK1	11	125625163	125676255	0.184132	-2.26148	0.0237297	Thyroid
MAPRE3	2	26970637	27027219	0.0110674	2.25969	0.0238408	Thyroid
TNRC6A	16	24610209	24827632	0.147387	-2.25958	0.0238471	Whole_Blood
RNF13	3	149812770	149962139	0.0222182	-2.25952	0.0238512	Thyroid
ITPR2	12	26335352	26833194	0.0974225	-2.25911	0.0238763	Whole_Blood
DMXL1	5	119037772	119249138	0.190529	-2.25896	0.023886	Thyroid
HTR2A	13	46831546	46897076	0.0205811	2.25853	0.0239128	Thyroid
CCDC183-AS1	9	136803927	136808848	0.0137691	2.25848	0.0239158	Whole_Blood
SENP5	3	196867856	196934714	0.105332	-2.25654	0.024037	Thyroid
RNF19A	8	100257060	100336218	0.0179085	-2.25634	0.0240491	Whole_Blood
PSG8-AS1	19	42821772	42826878	0.144446	2.25629	0.0240525	Brain_Hypothalamus
ADAM29	4	174829668	174978180	0.0382041	-2.25604	0.024068	Pituitary
SH3PXD2B	5	172325000	172454525	0.0328764	2.25594	0.0240743	Thyroid
CNIH2	11	66278175	66285301	0.0196167	-2.25404	0.0241935	Pituitary
RAB6B	3	133824235	133895882	0.0593174	-2.25376	0.024211	Pituitary
CPNE3	8	86514435	86561498	0.073746	-2.25343	0.0242321	Thyroid
TMBIM4	12	66135846	66170027	0.0513683	-2.25321	0.0242462	Brain_Hypothalamus
TCP11L1	11	33039417	33105943	0.35417	-2.25316	0.0242489	Whole_Blood
LINC01508	9	90300885	90433566	0.0260161	2.25229	0.024304	Pituitary
SCRN1	7	29920104	29990289	0.0743624	2.25177	0.0243367	Whole_Blood
MINDY1	1	150996549	151008376	0.0244732	-2.25071	0.0244036	Thyroid
NDUFV2	18	9102630	9134345	0.0173776	2.25036	0.024426	Thyroid
RASGRP1	15	38488103	38565575	0.0141039	2.25	0.0244488	Whole_Blood
TRAF5	1	211326615	211374946	0.0163292	2.24991	0.0244548	Thyroid
LCAT	16	67939750	67944131	0.0378553	2.24969	0.0244684	Thyroid
RPRD2	1	150363091	150476566	0.0408874	-2.24886	0.0245211	Whole_Blood
RPN2	20	37178410	37241619	0.02736	-2.24874	0.0245289	Brain_Hypothalamus
MPPED2-AS1	11	30584112	30632583	0.020773	-2.24828	0.0245586	Thyroid
REEP6	19	1491166	1497927	0.095106	-2.24765	0.0245987	Brain_Hypothalamus
LINC02537	6	43844878	43852317	0.157574	-2.24746	0.0246106	Thyroid
POMZP3	7	76609986	76627279	0.590989	2.24733	0.0246189	Brain_Hypothalamus
UROS	10	125784980	125823288	0.373439	-2.24714	0.0246312	Brain_Hypothalamus
JOSD2	19	50505998	50511220	0.0587881	-2.24556	0.0247321	Thyroid
TFAM	10	58385345	58399220	0.0639798	2.24524	0.0247528	Whole_Blood
TRMT1	19	13104902	13117567	0.0174255	2.24514	0.024759	Thyroid
ST5	11	8693351	8910951	0.0790065	-2.24462	0.0247927	Thyroid
FAM234B	12	13044381	13142521	0.178591	-2.24412	0.0248248	Thyroid
OR2L3	1	248046836	248063407	0.183247	2.24379	0.0248462	Brain_Hypothalamus
CASP8	2	201233443	201361836	0.381761	2.24357	0.0248599	Whole_Blood
DNASE1	16	3611728	3680143	0.0277021	2.24253	0.0249272	Whole_Blood
SOX9-AS1	17	72067099	72237203	0.0904452	2.24241	0.0249347	Brain_Hypothalamus
LINC01191	2	113970719	114007304	0.105889	2.24227	0.0249437	Whole_Blood
XYLB	3	38346760	38421348	0.0266324	-2.24225	0.0249455	Thyroid
HLA-DQA1	6	32628179	32647062	0.141207	-2.24215	0.0249517	Brain_Hypothalamus
PRRT3	3	9939450	9952408	0.0577526	2.24201	0.0249607	Whole_Blood
LOXHD1	18	46476972	46657220	0.272798	2.24193	0.0249659	Whole_Blood
GPR39	2	132416805	132646582	0.0580895	2.24187	0.02497	Brain_Hypothalamus
SMPD1	11	6390440	6394998	0.0715127	-2.24183	0.0249725	Thyroid
ZBTB44-DT	11	130314993	130403657	0.113965	2.24174	0.024978	Brain_Hypothalamus
FOXL2	3	138944224	138947137	0.100103	2.24119	0.0250136	Pituitary
RPL21	13	27251362	27256691	0.103328	2.24096	0.0250286	Whole_Blood
ZNF330	4	141220887	141234697	0.16359	-2.24083	0.0250371	Whole_Blood
MTHFD1	14	64388031	64463457	0.108441	-2.24042	0.0250638	Brain_Hypothalamus
UBR7	14	93207241	93229215	0.027665	2.23899	0.0251569	Whole_Blood
NDE1	16	15643267	15734691	0.147371	2.23804	0.0252184	Thyroid
MMP27	11	102691487	102705769	0.114676	-2.23795	0.0252241	Whole_Blood
NUCB2	11	17208153	17349980	0.106169	2.23738	0.0252613	Thyroid
ING3	7	120950763	120977216	0.0333642	2.23729	0.0252674	Whole_Blood
MFSD11	17	76735865	76781449	0.129295	2.23724	0.0252709	Thyroid
ADGRG5	16	57542643	57591681	0.0134812	-2.23609	0.0253461	Whole_Blood
EPOR	19	11377207	11384342	0.0221338	2.23594	0.0253554	Pituitary
SLC24A3	20	19212642	19722926	0.0735672	-2.23586	0.0253609	Thyroid
CCDC88B	11	64340204	64357534	0.0508611	2.23545	0.0253878	Thyroid
PSMA4	15	78540405	78552417	0.0997296	-2.23544	0.0253887	Whole_Blood
DYNC2H1	11	103109410	103479863	0.0703808	2.2354	0.0253911	Thyroid
SF3B2	11	66050729	66069308	0.26367	2.23533	0.0253957	Whole_Blood
MORN1	1	2321253	2391707	0.104247	-2.23531	0.0253971	Whole_Blood
ANKRD13B	17	29589769	29614761	0.265391	2.23516	0.025407	Thyroid
RERE-AS1	1	8424645	8435013	0.0383743	-2.23459	0.025444	Whole_Blood
ZNF831	20	59123381	59259113	0.0237524	-2.2333	0.0255292	Pituitary
LINC00484	9	91159573	91166272	0.108552	2.23286	0.0255581	Thyroid
ZFP37	9	113038377	113056759	0.0511687	2.23269	0.0255692	Pituitary
UTS2B	3	191267168	191330526	0.0239407	2.23248	0.025583	Brain_Hypothalamus
LIPJ	10	88586753	88606976	0.0186971	-2.23218	0.0256031	Pituitary
HBS1L	6	134960378	135103056	0.0564691	2.23215	0.0256048	Whole_Blood
FAM182B	20	25762384	25868225	0.34268	2.23166	0.0256371	Thyroid
PTCH2	1	44819844	44843253	0.0137669	-2.23128	0.0256626	Whole_Blood
TMEM199	17	28357642	28363683	0.16544	-2.23124	0.0256652	Brain_Hypothalamus
ILF2	1	153661788	153671028	0.0212893	2.23092	0.0256867	Whole_Blood
GPER1	7	1082208	1093815	0.0219762	2.2308	0.0256944	Pituitary
USF2	19	35268962	35279821	0.038472	2.23064	0.0257051	Whole_Blood
ANO5	11	21782659	22283567	0.323601	2.23028	0.0257289	Thyroid
MANEA-DT	6	95575183	95577450	0.0533342	-2.23	0.0257476	Thyroid
MITF	3	69739456	69968336	0.144117	2.22995	0.0257507	Thyroid
CCDC78	16	722582	726954	0.0956405	-2.22927	0.0257959	Thyroid
EMP1	12	13196723	13219941	0.138303	-2.22869	0.0258346	Thyroid
ORAI1	12	121626509	121643218	0.116265	-2.22802	0.0258793	Whole_Blood
LINC00877	3	71943592	72279503	0.0577824	-2.22788	0.0258885	Brain_Hypothalamus
KCNA1	12	4909905	4918256	0.0987943	2.22783	0.0258917	Thyroid
CBWD3	9	68232003	68300035	0.0280214	-2.22775	0.0258972	Whole_Blood
ERAP2	5	96875986	96919703	0.77416	-2.22723	0.0259318	Whole_Blood
KCNMA1	10	76869601	77638369	0.426411	2.22649	0.0259815	Whole_Blood
VLDLR-AS1	9	2421597	2622457	0.0301181	2.22641	0.0259864	Brain_Hypothalamus
RPL39L	3	187120948	187180908	0.0170877	-2.22579	0.026028	Thyroid
DUSP8	11	1554051	1572271	0.0219109	2.22519	0.0260686	Whole_Blood
KANK3	19	8322584	8343262	0.0341009	2.2244	0.0261218	Thyroid
CTTNBP2NL	1	112396214	112463456	0.0423865	-2.22422	0.026134	Brain_Hypothalamus
TMEM184A	7	1542235	1560821	0.127268	-2.2238	0.0261622	Thyroid
HOXA2	7	27100354	27102686	0.14229	-2.22299	0.0262163	Whole_Blood
TJP3	19	3708362	3750813	0.0654237	-2.22292	0.026221	Thyroid
PLEKHA8	7	30027404	30130483	0.125956	-2.22211	0.0262758	Pituitary
PPP1R1B	17	39626740	39636626	0.025252	2.22148	0.0263186	Brain_Hypothalamus
ZNF384	12	6666477	6689572	0.371828	2.22131	0.0263299	Thyroid
TSPYL6	2	54253178	54256229	0.131428	-2.22125	0.0263342	Brain_Hypothalamus
PSMA6	14	35278633	35317493	0.0390447	-2.22096	0.0263536	Brain_Hypothalamus
C11orf1	11	111878935	111885975	0.0379103	2.22084	0.0263621	Pituitary
ZFAND2B	2	219195237	219209651	0.028225	-2.22041	0.0263913	Pituitary
HECW1	7	43112629	43566001	0.149024	-2.21923	0.0264708	Thyroid
MMP25	16	3046062	3060726	0.0320667	2.21865	0.0265109	Pituitary
FAM20A	17	68535113	68601367	0.026809	2.21739	0.0265965	Brain_Hypothalamus
TIFA	4	112272968	112285955	0.11613	-2.21716	0.0266125	Thyroid
KCNQ4	1	40783787	40840452	0.0248628	-2.21684	0.026634	Brain_Hypothalamus
TTC19	17	15999784	16045015	0.240204	2.21584	0.0267023	Thyroid
FOS	14	75278826	75282230	0.0509286	-2.21576	0.0267082	Pituitary
ANKRD11	16	89267630	89490561	0.0814822	-2.2154	0.0267323	Whole_Blood
PCM1	8	17922842	18029948	0.318539	2.21526	0.0267424	Brain_Hypothalamus
PKIB	6	122471917	122726373	0.0881723	-2.21457	0.0267895	Thyroid
IRAK3	12	66189195	66254622	0.031195	-2.21401	0.0268279	Whole_Blood
CCNL1	3	157146508	157160760	0.0128043	2.2137	0.0268493	Thyroid
ZNF121	19	9560329	9584504	0.0277956	2.21321	0.0268831	Whole_Blood
PDLIM5	4	94451857	94668227	0.0349349	-2.2129	0.0269049	Thyroid
DDX23	12	48829756	48852842	0.019818	-2.21283	0.0269096	Whole_Blood
PPP2R2D	10	131901008	131959834	0.187899	-2.21275	0.0269147	Thyroid
LINC02284	14	56310880	56427032	0.0367751	2.21267	0.0269204	Whole_Blood
MAPKBP1	15	41774434	41827855	0.0788451	-2.21256	0.0269277	Pituitary
CDX1	5	150166778	150184558	0.0465103	2.21247	0.0269343	Brain_Hypothalamus
TMF1	3	69019827	69052339	0.0722219	2.2109	0.0270431	Pituitary
NOL4L	20	32443059	32585333	0.0256996	-2.21068	0.0270583	Pituitary
NLRP12	19	53793741	53824403	0.0499842	2.2104	0.0270772	Whole_Blood
ZNF662	3	42906142	42919334	0.0172128	2.20998	0.0271067	Thyroid
FAM220A	7	6329411	6348981	0.0749356	-2.20997	0.027107	Brain_Hypothalamus
EDIL3	5	83940554	84384880	0.0303704	2.20962	0.0271315	Whole_Blood
GALNT3	2	165747588	165794659	0.245386	2.20951	0.0271393	Pituitary
ACSS1	20	25006230	25058980	0.0437132	-2.20906	0.0271708	Thyroid
GSTZ1	14	77320996	77331597	0.085046	2.20905	0.027171	Whole_Blood
VAC14	16	70687439	70801160	0.0227362	-2.20663	0.0273396	Whole_Blood
DMXL2	15	51447711	51622833	0.0485295	2.20639	0.027357	Whole_Blood
ASGR1	17	7173431	7179564	0.130262	-2.20628	0.0273642	Pituitary
KRT81	12	52285913	52291534	0.0439016	-2.20601	0.0273833	Whole_Blood
EFNA1	1	155127876	155134899	0.0318669	2.20548	0.0274204	Thyroid
IKZF3	17	39757718	39864312	0.0635829	-2.20503	0.0274517	Whole_Blood
ARC	8	142611049	142614479	0.0477383	2.20387	0.0275334	Whole_Blood
ZNF483	9	111525159	111577844	0.178724	2.20342	0.0275652	Thyroid
ATP6V0A2	12	123712353	123761755	0.113661	-2.20248	0.0276317	Pituitary
ANKS1A	6	34889255	35091406	0.018987	-2.20194	0.0276698	Whole_Blood
RBFA	18	80034389	80050651	0.0924457	2.20182	0.0276783	Brain_Hypothalamus
SH3BP2	4	2793071	2841098	0.0977847	2.20149	0.0277016	Thyroid
ALDH4A1	1	18871430	18902724	0.047059	2.20038	0.0277799	Brain_Hypothalamus
ZNF263	16	3283283	3301401	0.0499101	2.20023	0.0277904	Pituitary
DUSP18	22	30652051	30667887	0.0900725	-2.19997	0.0278092	Brain_Hypothalamus
BICDL2	16	3027682	3036944	0.10197	-2.19981	0.0278207	Thyroid
HPGD	4	174490175	174523154	0.0190467	-2.19971	0.0278277	Pituitary
ZNF396	18	35366694	35377337	0.114259	2.19929	0.027857	Whole_Blood
AGAP1-IT1	2	235505553	235507566	0.153616	-2.19925	0.0278599	Brain_Hypothalamus
ZNF609	15	64460578	64686068	0.0862731	2.19799	0.0279495	Thyroid
MYOM1	18	3066807	3219968	0.051897	-2.19798	0.0279503	Pituitary
DYM	18	49036387	49461347	0.121797	2.19788	0.0279575	Whole_Blood
CCBE1	18	59430939	59697662	0.0971257	2.19774	0.0279674	Thyroid
PNPT1	2	55634061	55693863	0.0110608	2.19764	0.0279748	Whole_Blood
ZNF594	17	5179535	5191868	0.0744402	-2.19754	0.0279817	Brain_Hypothalamus
MED20	6	41905354	41921139	0.0106111	2.19678	0.028036	Whole_Blood
CEP57L1	6	109095110	109174418	0.0370702	-2.19451	0.0281988	Brain_Hypothalamus
SARDH	9	133663560	133739955	0.246158	-2.19423	0.028219	Whole_Blood
PCED1A	20	2835314	2841190	0.0198443	2.194	0.0282351	Thyroid
NOC2L	1	944203	959309	0.0610941	2.19397	0.0282378	Brain_Hypothalamus
MAP3K13	3	185282941	185489094	0.238624	-2.19361	0.0282632	Whole_Blood
GPR65	14	88005135	88014811	0.133568	2.19322	0.0282912	Whole_Blood
SCRN2	17	47837692	47841289	0.195926	2.19322	0.0282914	Brain_Hypothalamus
LINC02826	12	125983702	126043485	0.121359	2.19306	0.0283028	Brain_Hypothalamus
ORM2	9	114329869	114333251	0.145346	2.19268	0.0283301	Whole_Blood
CEP41	7	130393771	130442433	0.160939	2.19253	0.0283413	Thyroid
PLEKHS1	10	113751262	113783429	0.018082	2.19249	0.0283444	Thyroid
SLC6A3	5	1392794	1445440	0.231637	2.19197	0.0283819	Thyroid
SPG21	15	64963022	64990310	0.370864	2.19186	0.0283894	Thyroid
TRIM35	8	27284886	27311272	0.0522011	2.19181	0.0283931	Thyroid
PTAFR	1	28147166	28193936	0.0317963	-2.19151	0.0284147	Thyroid
LSM2	6	31797396	31806966	0.0282938	2.19145	0.0284193	Whole_Blood
CORO2B	15	68578993	68727806	0.0490202	2.19122	0.0284358	Thyroid
UBE2K	4	39698109	39782792	0.0555295	2.19078	0.0284677	Whole_Blood
EI24	11	125569280	125584684	0.0122675	2.19062	0.0284795	Whole_Blood
HHIPL1	14	99645129	99680569	0.0754603	2.19049	0.0284888	Thyroid
TMEM151A	11	66291894	66296664	0.0969294	-2.18963	0.0285513	Pituitary
LIPM	10	88802730	88820546	0.0961612	2.1895	0.0285607	Whole_Blood
GGT1	22	24594811	24629005	0.14152	2.18822	0.0286539	Brain_Hypothalamus
FOXN3	14	89124871	89619149	0.0103705	-2.18816	0.028658	Thyroid
LINC01990	3	107430892	107463912	0.0459026	-2.18745	0.0287095	Brain_Hypothalamus
BUB1B	15	40161023	40221123	0.0328583	-2.18715	0.0287317	Pituitary
L3HYPDH	14	59460363	59484408	0.444252	2.18615	0.0288046	Brain_Hypothalamus
HSP90B1	12	103930107	103953931	0.0325087	-2.18601	0.0288145	Whole_Blood
ANAPC4	4	25377263	25418498	0.345943	2.18601	0.0288146	Pituitary
THAP4	2	241584405	241637158	0.02525	2.18481	0.028903	Brain_Hypothalamus
ATP10D	4	47485275	47593486	0.0879186	2.18394	0.0289667	Whole_Blood
PIK3R4	3	130678934	130746829	0.135454	-2.18375	0.028981	Pituitary
SLC16A3	17	82217934	82261129	0.0564759	2.18341	0.0290055	Pituitary
SCGB1D2	11	62242239	62244812	0.0292478	2.18339	0.029007	Brain_Hypothalamus
GSPT1	16	11868128	11916082	0.236258	2.18278	0.0290521	Thyroid
LY6H	8	143157914	143160711	0.0693749	-2.1824	0.0290799	Thyroid
HDHD5-AS1	22	17159351	17165447	0.0156088	2.18166	0.0291344	Thyroid
NFIA	1	60865259	61462788	0.0282539	-2.18163	0.0291365	Thyroid
AP4B1-AS1	1	113856635	113901237	0.100947	-2.17995	0.0292608	Pituitary
TRAF3	14	102777449	102911500	0.0988911	-2.17942	0.0293008	Brain_Hypothalamus
B9D2	19	41354417	41364165	0.0309671	-2.17929	0.0293103	Thyroid
LMAN2L	2	96705929	96740064	0.153379	2.17786	0.0294168	Thyroid
DESI1	22	41598028	41621043	0.140043	2.17775	0.0294249	Whole_Blood
SEPTIN3	22	41969443	41998221	0.0622072	-2.1777	0.0294287	Brain_Hypothalamus
PERM1	1	975198	982117	0.039071	-2.17699	0.0294816	Whole_Blood
SLC25A24	1	108134043	108200849	0.324208	2.17672	0.0295017	Whole_Blood
TNPO1	5	72816312	72916733	0.03042	-2.1761	0.0295475	Thyroid
ACBD7	10	15075475	15088776	0.100502	2.17593	0.0295605	Pituitary
SAA1	11	18266260	18269977	0.0141344	-2.1756	0.0295853	Thyroid
FGF17	8	22042398	22048809	0.174227	2.17553	0.0295905	Thyroid
RPS18	6	33272075	33276511	0.412084	-2.17404	0.0297024	Brain_Hypothalamus
DCAKD	17	45023338	45061131	0.0509567	2.17402	0.0297037	Pituitary
NME4	16	396725	410367	0.178542	-2.17401	0.0297043	Thyroid
GOLIM4	3	168008689	168095924	0.0420021	-2.17379	0.0297206	Thyroid
CDC37L1-DT	9	4676600	4679537	0.046316	-2.17371	0.0297271	Whole_Blood
DAG1	3	49468713	49535618	0.0125455	-2.17293	0.0297859	Whole_Blood
MMAA	4	145599042	145660033	0.136569	-2.17274	0.0297996	Brain_Hypothalamus
CNPY4	7	100119634	100125508	0.0711837	-2.17106	0.0299266	Whole_Blood
MYLK-AS1	3	123585143	123644568	0.0718839	-2.17072	0.0299521	Brain_Hypothalamus
SVIL	10	29457338	29736959	0.137602	-2.16967	0.0300316	Thyroid
ZBTB18	1	244048547	244057476	0.0270244	-2.16966	0.0300325	Pituitary
SNAPC1	14	61762420	61796428	0.095275	-2.16917	0.0300698	Thyroid
BHLHE41	12	26120030	26125037	0.0970184	2.16851	0.03012	Thyroid
APOD	3	195568705	195584033	0.0789858	-2.16794	0.0301631	Brain_Hypothalamus
ADAMTS8	11	130404923	130428609	0.0516556	-2.16767	0.0301836	Pituitary
CCDC81	11	86374736	86423109	0.0179193	-2.16677	0.0302521	Pituitary
XCL2	1	168540768	168543997	0.147071	-2.16627	0.0302904	Thyroid
SOX9	17	72121020	72126416	0.0795097	-2.16624	0.0302928	Thyroid
SLX1A	16	30193875	30197561	0.0325663	2.16612	0.0303022	Brain_Hypothalamus
IPO13	1	43946950	43968022	0.0686585	2.16557	0.0303439	Whole_Blood
ATG9A	2	219219380	219229717	0.0239141	-2.16545	0.0303531	Thyroid
KDM1B	6	18155329	18223854	0.098953	2.16524	0.0303695	Whole_Blood
WDR3	1	117929720	117966543	0.012157	-2.16489	0.0303961	Whole_Blood
CPNE7	16	89575758	89597246	0.0329371	2.16404	0.0304611	Brain_Hypothalamus
ZNF573	19	37735833	37817300	0.0644474	2.1638	0.0304794	Brain_Hypothalamus
HPS5	11	18278668	18322198	0.0114167	-2.1637	0.0304871	Thyroid
ATXN1	6	16299112	16761491	0.10723	2.16314	0.0305305	Whole_Blood
CLIC1	6	31730581	31739763	0.0160009	2.16314	0.0305306	Whole_Blood
RTN4RL2	11	57460528	57477534	0.0413305	2.16014	0.0307621	Pituitary
ADK	10	74151202	74709963	0.0247203	2.15955	0.0308079	Thyroid
SUPV3L1	10	69180234	69209099	0.0690988	2.15909	0.0308434	Pituitary
PLA2G4C	19	48047843	48110817	0.130759	-2.159	0.0308505	Brain_Hypothalamus
MRPL42	12	93467514	93516214	0.216348	2.1586	0.0308808	Thyroid
SAP30BP	17	75667251	75708062	0.0198278	2.1584	0.0308965	Thyroid
LFNG	7	2512529	2529177	0.0358553	2.15759	0.0309598	Thyroid
SYCE1	10	133553901	133569835	0.0384438	2.15663	0.0310344	Brain_Hypothalamus
CIITA	16	10866222	10943021	0.0287139	-2.15616	0.0310714	Thyroid
EHBP1L1	11	65576046	65592650	0.0261715	-2.15602	0.0310824	Thyroid
CLTCL1	22	19179473	19291719	0.204238	2.15552	0.031121	Whole_Blood
NDUFAB1	16	23581014	23596316	0.0133683	-2.15505	0.0311577	Whole_Blood
PCAT18	18	26687621	26703638	0.62265	2.15441	0.0312079	Thyroid
TUBE1	6	112070663	112087529	0.0454074	2.15414	0.0312289	Brain_Hypothalamus
MAP2K7	19	7903843	7914478	0.0146137	2.15388	0.0312494	Whole_Blood
KAT5	11	65711996	65719604	0.0314845	-2.15372	0.0312622	Brain_Hypothalamus
LMAN1	18	59327823	59359265	0.015322	2.15354	0.0312765	Thyroid
ECI1	16	2239402	2252300	0.144841	2.15349	0.0312801	Thyroid
DUBR	3	107220744	107348464	0.0791814	2.15342	0.0312856	Pituitary
LPIN3	20	41340821	41360582	0.167902	-2.15331	0.0312947	Thyroid
SAPCD1	6	31762656	31764850	0.0249511	-2.15108	0.0314696	Brain_Hypothalamus
RASD2	22	35540831	35553999	0.0260721	2.15049	0.0315163	Pituitary
OST4	2	27070472	27071654	0.0172018	-2.15007	0.03155	Pituitary
DYRK1A	21	37365573	37526358	0.0172729	-2.15	0.0315553	Pituitary
ABI3BP	3	100749156	100993515	0.0767195	-2.14976	0.0315742	Thyroid
KATNAL2	18	46917492	47103478	0.0542752	-2.14971	0.0315784	Pituitary
ANGPTL6	19	10092338	10102678	0.118209	-2.14785	0.0317259	Whole_Blood
DDIT3	12	57516588	57521737	0.0617686	2.14758	0.0317473	Thyroid
MFAP2	1	16974502	16980632	0.0903304	2.14738	0.031763	Brain_Hypothalamus
RAB19	7	140404058	140427974	0.106097	2.14698	0.0317949	Thyroid
ATP1B3	3	141876124	141926549	0.0462456	-2.14661	0.031824	Pituitary
MX1	21	41420020	41470071	0.0471979	2.14657	0.0318274	Pituitary
ARID3A	19	925781	975939	0.0916143	2.14622	0.031855	Thyroid
LMO2	11	33858576	33892076	0.0370756	-2.14459	0.0319857	Whole_Blood
C4orf36	4	86876205	86892422	0.0293285	2.14395	0.0320369	Thyroid
REM2	14	22883222	22887678	0.0106941	-2.14373	0.0320549	Thyroid
TMPRSS13	11	117900641	117929459	0.0129666	2.14366	0.0320604	Whole_Blood
CENPV	17	16342534	16353656	0.0884957	-2.14283	0.0321265	Whole_Blood
NMT1	17	44957992	45109016	0.0774852	-2.14209	0.0321861	Brain_Hypothalamus
HSPBAP1	3	122739999	122793831	0.0605529	2.14196	0.0321968	Pituitary
VPS35L	16	19555240	19706793	0.0223289	2.1414	0.0322422	Thyroid
PEX14	1	10472288	10630758	0.0771126	-2.14099	0.0322752	Whole_Blood
RINT1	7	105532169	105567677	0.0343819	-2.14047	0.0323171	Thyroid
PDE4A	19	10416773	10469630	0.0215775	-2.14003	0.0323523	Pituitary
POLA2	11	65261913	65305959	0.0905614	2.13965	0.0323834	Whole_Blood
DPPA4	3	109326144	109337546	0.0325093	-2.13906	0.0324308	Thyroid
SH3BP4	2	234952017	235055714	0.014876	2.13886	0.0324473	Thyroid
VSTM4	10	49014236	49115522	0.0119298	2.13791	0.0325238	Thyroid
SLC26A10	12	57619527	57626036	0.0291602	2.13733	0.0325711	Pituitary
CUL7	6	43037617	43053943	0.185126	2.13729	0.0325746	Pituitary
HTR6	1	19664875	19680966	0.0777341	2.13723	0.032579	Pituitary
LTBP2	14	74498183	74612378	0.0379796	-2.13681	0.0326132	Whole_Blood
AGT	1	230690776	230745576	0.0252742	-2.13626	0.0326581	Pituitary
PSMG2	18	12658043	12728945	0.137599	2.13574	0.0327008	Thyroid
NUP93	16	56730118	56850286	0.019662	-2.13549	0.0327214	Pituitary
INO80	15	40978880	41116280	0.0308028	2.13458	0.0327957	Pituitary
HEY2	6	125747664	125761269	0.0497886	2.1344	0.0328103	Brain_Hypothalamus
KCNMB1	5	170374671	170389634	0.0168356	-2.13388	0.0328528	Thyroid
PROSER3	19	35758143	35771166	0.0356748	-2.13349	0.0328844	Whole_Blood
MDC1	6	30699807	30717447	0.0866401	-2.13299	0.0329253	Whole_Blood
SDHD	11	112086824	112120016	0.0196346	-2.13284	0.0329378	Whole_Blood
TSPOAP1-AS1	17	58324472	58415766	0.0634521	-2.13249	0.0329667	Whole_Blood
EML6	2	54723499	54972025	0.0535163	2.1318	0.033023	Pituitary
RIOK2	5	97160867	97183247	0.0493778	2.13156	0.0330431	Thyroid
FRS2	12	69470349	69579793	0.0229812	2.13107	0.0330836	Pituitary
SEC16A	9	136440096	136483759	0.228118	2.13005	0.0331676	Thyroid
UBALD2	17	76265348	76271298	0.0412495	-2.12972	0.0331945	Whole_Blood
CPED1	7	120988697	121297442	0.114673	2.12965	0.0332004	Whole_Blood
RGS14	5	177357924	177372596	0.46291	2.12949	0.0332134	Pituitary
RBM12B	8	93728155	93741017	0.0106918	2.12932	0.0332277	Thyroid
ENOSF1	18	670318	712662	0.181393	2.12887	0.0332647	Brain_Hypothalamus
NMUR2	5	152391546	152433368	0.300662	-2.12838	0.0333057	Thyroid
KRTAP5-10	11	71565563	71566735	0.0163344	2.12728	0.0333965	Pituitary
PRSS22	16	2852730	2858170	0.309858	-2.12659	0.0334542	Thyroid
LOXL1-AS1	15	73908071	73928248	0.113191	2.12545	0.0335494	Whole_Blood
ACVR2B	3	38453890	38493142	0.0679399	-2.12536	0.0335568	Thyroid
FGFR4	5	177086905	177098144	0.189155	-2.12525	0.0335656	Pituitary
AGPAT4	6	161129967	161274061	0.0492401	-2.12524	0.0335664	Pituitary
TRAPPC9	8	139727725	140458579	0.133617	-2.12521	0.0335689	Pituitary
HSH2D	19	16134028	16158575	0.0432509	2.12496	0.0335903	Pituitary
MATN1	1	30711277	30723585	0.0261719	-2.12483	0.0336009	Whole_Blood
NOP9	14	24299850	24309124	0.119671	-2.12406	0.0336648	Thyroid
LIAS	4	39459004	39485109	0.0331593	-2.1235	0.0337123	Pituitary
S100A14	1	153614255	153616986	0.346675	2.12309	0.033746	Thyroid
ALG3	3	184242301	184249548	0.0635444	-2.12251	0.0337953	Brain_Hypothalamus
SF3B5	6	144094884	144095573	0.0293287	-2.12237	0.0338063	Brain_Hypothalamus
TP53INP2	20	34704339	34713439	0.0178008	2.12225	0.0338166	Whole_Blood
MAFG-DT	17	81927829	81930753	0.0383336	2.12185	0.0338501	Brain_Hypothalamus
BBS4	15	72686179	72738475	0.185703	-2.12162	0.0338695	Whole_Blood
TOX	8	58805412	59119147	0.0152218	-2.1215	0.0338797	Whole_Blood
CD300LB	17	74521174	74531475	0.030433	2.12089	0.0339309	Whole_Blood
CLSTN3	12	7129698	7158945	0.448215	2.12054	0.0339605	Whole_Blood
EMCN	4	100395341	100880126	0.0416299	-2.12029	0.0339818	Brain_Hypothalamus
EPDR1	7	37920640	37951936	0.124395	-2.12008	0.0339997	Thyroid
HLA-DPB1	6	33075990	33089696	0.0535452	-2.11926	0.0340685	Whole_Blood
LINC00235	16	525155	527407	0.0385917	-2.11925	0.0340694	Pituitary
TMEM45B	11	129815848	129860003	0.0159878	-2.11839	0.0341416	Thyroid
CHRM3	1	239386565	239915452	0.0201627	2.11834	0.0341467	Pituitary
TMEM59L	19	18607430	18621039	0.0117741	2.11789	0.0341841	Whole_Blood
SEC22C	3	42547969	42601080	0.0977343	2.11779	0.0341928	Thyroid
PSMD4	1	151254709	151267479	0.0884162	-2.11757	0.0342115	Pituitary
SYK	9	90801787	90898549	0.010964	-2.11755	0.0342129	Whole_Blood
NT5C3B	17	41825057	41836260	0.668203	2.11729	0.0342352	Whole_Blood
ZNF335	20	45948660	45972203	0.0588624	2.11682	0.034275	Whole_Blood
LRRK1	15	100919327	101078257	0.0583359	-2.11657	0.0342965	Thyroid
DSTYK	1	205142505	205211702	0.0421806	-2.11651	0.0343015	Whole_Blood
SMIM8	6	87322583	87399749	0.174522	2.11616	0.0343308	Thyroid
SCN3A	2	165087526	165204050	0.0821872	-2.11591	0.0343527	Thyroid
DIMT1	5	62347284	62403943	0.0813592	2.11547	0.0343901	Thyroid
DNAH14	1	224896262	225399292	0.0193957	-2.11534	0.034401	Pituitary
ANG	14	20684177	20698971	0.0802567	2.11518	0.0344148	Whole_Blood
PHIP	6	78934419	79078287	0.0334057	2.11481	0.0344459	Brain_Hypothalamus
TM9SF2	13	99446311	99564048	0.104745	2.11455	0.0344684	Pituitary
IPPK	9	92613183	92670131	0.151026	-2.11451	0.0344718	Pituitary
FAM49A	2	16549459	16666331	0.0197916	-2.11377	0.0345345	Pituitary
POPDC3	6	105157900	105180014	0.0709369	2.11229	0.0346612	Pituitary
C6orf47	6	31658298	31660778	0.0110695	-2.11221	0.0346687	Thyroid
LGALS3BP	17	78971238	78979947	0.0255894	-2.11214	0.0346742	Pituitary
EPM2AIP1	3	36985043	36993131	0.0235654	2.11179	0.0347043	Whole_Blood
PDLIM4	5	132257696	132273454	0.118856	2.11172	0.0347102	Thyroid
SP2	17	47896150	47928957	0.0110386	2.11149	0.03473	Thyroid
DPY19L4	8	94719703	94793836	0.0876349	-2.11101	0.0347714	Thyroid
PRDM4	12	107732871	107761272	0.0900122	2.111	0.0347724	Whole_Blood
PRODH	22	18912777	18936553	0.097562	-2.11093	0.0347784	Thyroid
NIT2	3	100334739	100361635	0.10212	2.11091	0.0347801	Thyroid
CCDC54	3	107377439	107378635	0.0237832	2.11079	0.0347901	Thyroid
LINC02648	10	6618716	6625346	0.0568304	-2.11078	0.0347916	Whole_Blood
MYO6	6	75749201	75919537	0.023144	-2.11076	0.0347928	Brain_Hypothalamus
CTPS1	1	40979300	41012565	0.11048	-2.10988	0.034869	Whole_Blood
BROX	1	222712553	222735196	0.113052	2.10896	0.0349484	Thyroid
IRAK4	12	43758944	43798307	0.0171308	2.10885	0.0349574	Whole_Blood
TYMSOS	18	630886	658350	0.0185748	-2.1084	0.0349967	Whole_Blood
LINC00884	3	194487140	194521156	0.0519121	-2.10794	0.0350358	Pituitary
TMPRSS5	11	113687547	113706373	0.0941387	-2.10788	0.0350415	Pituitary
UBXN4	2	135741734	135785056	0.0370417	2.10771	0.0350561	Brain_Hypothalamus
GJB5	1	34755047	34758512	0.15039	2.10754	0.0350705	Thyroid
SLC15A3	11	60937060	60952653	0.0401674	-2.10751	0.0350733	Whole_Blood
BPTF	17	67825503	67984378	0.0688785	-2.10694	0.0351227	Brain_Hypothalamus
UBAP1L	15	65092760	65115200	0.0276726	-2.10626	0.0351821	Pituitary
IPP	1	45694324	45750653	0.0865957	-2.10625	0.0351825	Thyroid
NAGK	2	71064344	71079808	0.0734	2.10569	0.0352317	Thyroid
GDF11	12	55743122	55757264	0.0120344	2.10473	0.035315	Thyroid
ATMIN	16	81035842	81047350	0.107015	2.10446	0.0353388	Thyroid
FAM92A	8	93698561	93731527	0.0361415	-2.1041	0.0353698	Thyroid
STRN4	19	46719511	46746994	0.129719	-2.1037	0.035405	Whole_Blood
UBXN6	19	4444999	4457794	0.248891	2.10365	0.0354089	Brain_Hypothalamus
ACACB	12	109116587	109268226	0.0375021	2.10357	0.0354162	Pituitary
SCUBE3	6	35213956	35253079	0.0104424	2.10311	0.0354558	Whole_Blood
SLC6A6	3	14402576	14489349	0.226311	2.10294	0.0354714	Thyroid
MAD1L1	7	1815793	2233243	0.229789	-2.10262	0.0354987	Whole_Blood
PFDN1	5	140245035	140303113	0.0315692	-2.10251	0.0355088	Thyroid
ASAH1	8	18055992	18084998	0.428361	2.10183	0.0355683	Whole_Blood
ABHD1	2	27123789	27130812	0.0455935	2.10172	0.0355777	Thyroid
CORT	1	10450031	10451998	0.0508363	-2.10144	0.0356024	Whole_Blood
YY1	14	100238298	100282788	0.0352848	2.1011	0.0356323	Pituitary
PCDHB7	5	141172644	141176383	0.0105569	2.10063	0.0356731	Thyroid
SAA2	11	18239223	18248668	0.0114523	-2.10062	0.0356745	Thyroid
ZSCAN29	15	43358172	43371043	0.273822	2.1004	0.035694	Thyroid
PLRG1	4	154535005	154550400	0.0183698	2.10018	0.0357132	Thyroid
LINC01649	1	115904855	115931616	0.0692615	2.10015	0.0357156	Brain_Hypothalamus
NME2	17	51165435	51171744	0.273666	-2.09986	0.0357415	Brain_Hypothalamus
APOBEC3D	22	39021113	39033277	0.146846	-2.09943	0.035779	Thyroid
RSRC1	3	158105855	158545730	0.0943709	-2.09852	0.0358593	Whole_Blood
TMA16	4	163494442	163520539	0.0588309	-2.09832	0.0358768	Brain_Hypothalamus
AFAP1L2	10	114294824	114404756	0.0101442	2.09824	0.035884	Thyroid
CCDC127	5	196868	218153	0.141415	2.09698	0.0359951	Pituitary
ITGA2B	17	44372180	44389649	0.0907899	2.09651	0.0360371	Thyroid
EFCAB1	8	48710789	48735311	0.207381	2.09613	0.0360707	Thyroid
AKAP10	17	19904302	19978343	0.0427423	2.09604	0.0360784	Pituitary
RNF187	1	228487382	228499899	0.0659804	-2.0959	0.0360909	Brain_Hypothalamus
NOMO3	16	16232506	16300806	0.556477	-2.09564	0.0361138	Brain_Hypothalamus
RBM46	4	154781213	154828813	0.0111654	2.09554	0.0361226	Thyroid
PSMF1	20	1113240	1189415	0.035981	2.09514	0.0361588	Whole_Blood
MYL1	2	210290150	210315174	0.0265127	-2.09497	0.0361735	Pituitary
GPR179	17	38324571	38343956	0.0479568	2.09449	0.036216	Thyroid
ZCCHC2	18	62523025	62587709	0.038285	2.09441	0.0362233	Whole_Blood
CCNC	6	99542387	99568825	0.0297992	-2.09429	0.0362342	Pituitary
CACNA1D	3	53328963	53813733	0.0283206	-2.0937	0.036287	Brain_Hypothalamus
FBP2	9	94558720	94593824	0.0694195	2.09358	0.0362978	Pituitary
TMEM54	1	32894594	32901438	0.202819	2.0932	0.036331	Thyroid
FNDC5	1	32862268	32872482	0.0365634	2.0932	0.036331	Thyroid
ZYG11B	1	52726453	52827336	0.0183644	-2.09313	0.0363371	Thyroid
LINC02744	11	119987952	119995037	0.0264685	-2.09304	0.0363459	Brain_Hypothalamus
C6orf226	6	42890265	42890821	0.0214591	-2.09302	0.0363475	Pituitary
HPCA	1	32885994	32898441	0.0514958	2.09266	0.0363799	Thyroid
RTBDN	19	12825478	12835428	0.044219	-2.09205	0.0364336	Brain_Hypothalamus
TMEM246	9	101473170	101533537	0.379478	-2.09193	0.0364447	Thyroid
CHRNA9	4	40335333	40355217	0.0232534	2.09175	0.0364607	Pituitary
CHTOP	1	153633982	153646306	0.12473	2.09172	0.0364635	Thyroid
CDC14A	1	100345001	100520277	0.104295	-2.09167	0.0364677	Thyroid
ZNF16	8	144930358	144950888	0.0322284	2.09162	0.036473	Whole_Blood
VPS41	7	38722974	38932394	0.0585596	2.09109	0.0365202	Whole_Blood
NKAPD1	11	112074086	112085150	0.0214026	2.09092	0.0365354	Thyroid
TRAF3IP1	2	238320441	238400897	0.0728729	-2.09017	0.0366021	Brain_Hypothalamus
CRACR2A	12	3606633	3764819	0.0122116	2.09008	0.0366107	Whole_Blood
ZNF12	7	6688433	6706947	0.041456	2.08995	0.0366224	Pituitary
TRAPPC6B	14	39147811	39170532	0.142457	2.0898	0.0366359	Pituitary
IDH3B	20	2658395	2664219	0.0191279	-2.08898	0.0367092	Whole_Blood
FBXO25	8	406428	477967	0.0627967	2.0886	0.0367436	Brain_Hypothalamus
SPINK8	3	48306842	48333661	0.08184	2.08841	0.0367609	Whole_Blood
DUOX1	15	45129933	45165576	0.143762	-2.08833	0.0367682	Brain_Hypothalamus
SSPN	12	26121991	26299290	0.0782448	2.08793	0.0368045	Thyroid
SMARCB1	22	23786931	23838009	0.0833048	2.08779	0.036817	Brain_Hypothalamus
AARS2	6	44298731	44313347	0.0462191	-2.08769	0.0368259	Brain_Hypothalamus
TMEM260	14	56488354	56650606	0.057201	-2.08769	0.0368261	Thyroid
CLEC2D	12	9664969	9699553	0.03758	-2.08739	0.0368525	Brain_Hypothalamus
IGFLR1	19	35738801	35742453	0.144908	-2.08735	0.0368568	Whole_Blood
IGF1R	15	98648539	98964530	0.124175	-2.0872	0.0368699	Thyroid
DBH-AS1	9	133654586	133657313	0.282785	2.08684	0.0369029	Brain_Hypothalamus
MAPK9	5	180233143	180292099	0.111314	-2.08616	0.036964	Pituitary
TFCP2L1	2	121216587	121285202	0.0153594	2.08538	0.0370352	Thyroid
RNF2	1	185045526	185102603	0.0182222	2.08514	0.0370563	Thyroid
UNC119B	12	120710458	120723640	0.0684831	2.08513	0.0370575	Thyroid
RAD51AP2	2	17510579	17518440	0.0611281	2.08446	0.0371186	Thyroid
CASC2	10	118046279	118210158	0.112114	2.08423	0.0371394	Brain_Hypothalamus
COPG2	7	130506238	130668748	0.211512	-2.08411	0.0371501	Pituitary
FNDC9	5	157341598	157345677	0.0220854	2.08401	0.0371593	Whole_Blood
RAB3IP	12	69738860	69823204	0.0926334	-2.08355	0.0372011	Pituitary
CLNK	4	10486395	10684768	0.0130683	-2.08288	0.037262	Thyroid
F12	5	177402133	177416583	0.0471035	-2.08268	0.0372802	Thyroid
SGCA	17	50164214	50175928	0.383067	-2.08199	0.0373435	Thyroid
PTDSS2	11	448268	491399	0.0498775	2.08075	0.0374563	Whole_Blood
FAM71F2	7	128671693	128687877	0.0754904	-2.08059	0.0374716	Brain_Hypothalamus
GINS3	16	58295080	58406147	0.0324574	2.0805	0.0374794	Thyroid
RGS11	16	268301	275980	0.0665206	-2.0798	0.0375443	Brain_Hypothalamus
LINC02298	14	105092737	105100131	0.310264	2.07956	0.0375655	Thyroid
ZSCAN30	18	35251058	35290245	0.0708135	-2.07949	0.0375722	Whole_Blood
MATN3	2	19992052	20012668	0.0233575	-2.0791	0.0376077	Brain_Hypothalamus
CYTOR	2	87454781	87636740	0.126876	2.07849	0.0376645	Pituitary
ESYT1	12	56118250	56144674	0.0141424	-2.0771	0.0377922	Thyroid
TRAM2-AS1	6	52576787	52643058	0.155729	-2.07704	0.0377976	Pituitary
C15orf40	15	82988441	83011641	0.460012	-2.07701	0.0378007	Brain_Hypothalamus
EIF6	20	35278907	35284985	0.0863565	2.07661	0.0378373	Thyroid
CALHM2	10	103446786	103452402	0.211569	2.07658	0.03784	Whole_Blood
OTOF	2	26457203	26558756	0.0210995	2.07559	0.0379316	Thyroid
ARMH3	10	101845599	102056193	0.0303682	-2.07512	0.0379755	Thyroid
AVL9	7	32495426	32588726	0.0809026	-2.07494	0.0379922	Thyroid
UTP18	17	51260546	51297936	0.274699	-2.07401	0.0380787	Brain_Hypothalamus
VWA2	10	114239254	114294489	0.0188633	2.07379	0.0380989	Thyroid
ZBTB38	3	141324213	141449792	0.127745	2.07335	0.03814	Pituitary
ATXN7L2	1	109483479	109492804	0.0250224	2.07319	0.0381541	Brain_Hypothalamus
HIVEP2	6	142751469	142956698	0.0762037	-2.0728	0.0381908	Pituitary
LPAR5	12	6618835	6635960	0.0387577	-2.07267	0.0382029	Thyroid
CACNA1B	9	137877782	138124624	0.0813248	-2.07234	0.0382338	Brain_Hypothalamus
PRDM15	21	41798225	41879482	0.32235	2.07178	0.0382857	Pituitary
LAMC1	1	183023420	183145592	0.0325135	2.07149	0.0383126	Thyroid
SKAP1	17	48133442	48430275	0.170218	-2.07131	0.0383302	Thyroid
HOOK2	19	12763003	12872740	0.0311438	2.07128	0.0383327	Thyroid
ZBBX	3	167239843	167407874	0.0425648	2.07101	0.0383575	Brain_Hypothalamus
NDUFAF5	20	13785007	13821580	0.105846	2.07098	0.0383605	Pituitary
ZNF268	12	133181409	133214832	0.146872	-2.07032	0.0384221	Brain_Hypothalamus
IQSEC3	12	66767	178455	0.445535	-2.07011	0.0384419	Whole_Blood
ITPR3	6	33620365	33696574	0.127378	-2.069	0.0385462	Thyroid
CTDSP2	12	57819927	57846729	0.0111923	-2.06893	0.038553	Thyroid
HCG20	6	30743790	30792250	0.059253	-2.0686	0.0385841	Thyroid
FGFBP3	10	91906584	91909486	0.100481	-2.06853	0.0385898	Thyroid
METTL27	7	73834590	73842516	0.609508	-2.06848	0.0385951	Pituitary
TMEM69	1	45688181	45694436	0.0889022	2.06784	0.0386554	Pituitary
LINC01547	21	44932814	44939941	0.155164	-2.06767	0.0386707	Pituitary
TMEM9B	11	8947202	8965011	0.0438986	-2.06764	0.0386742	Brain_Hypothalamus
SHTN1	10	116881477	117126586	0.0332097	-2.06731	0.0387046	Thyroid
C2orf49	2	105337532	105349211	0.0445634	2.06715	0.0387205	Brain_Hypothalamus
LENG1	19	54155161	54159721	0.0117604	-2.06691	0.0387422	Whole_Blood
NXF1	11	62792123	62806302	0.0151129	2.06659	0.0387724	Whole_Blood
TUFT1	1	151540305	151583583	0.0351426	-2.06629	0.0388009	Pituitary
CLRN1	3	150926163	150972727	0.0332502	2.0662	0.0388093	Pituitary
LRG1	19	4536402	4540036	0.0215331	2.06603	0.038826	Thyroid
CHMP1A	16	89640816	89657738	0.264131	2.06538	0.0388872	Thyroid
GATA5	20	62463497	62475995	0.0655164	2.06487	0.038935	Pituitary
PHYKPL	5	178208471	178232802	0.0304582	2.06483	0.038939	Brain_Hypothalamus
RPH3A	12	112570380	112898881	0.0265755	-2.06474	0.038948	Thyroid
NFYC-AS1	1	40690380	40692074	0.0985035	2.06453	0.0389674	Thyroid
RELN	7	103471381	103989658	0.0204768	-2.06441	0.0389789	Thyroid
ANKRD42	11	83193712	83260694	0.0704335	2.06366	0.0390496	Brain_Hypothalamus
GDF6	8	96142333	96160806	0.0191887	-2.0636	0.0390555	Thyroid
MAP1S	19	17719242	17734513	0.0390873	2.06335	0.0390797	Thyroid
CD1D	1	158178030	158186427	0.0169881	-2.06301	0.0391117	Whole_Blood
VWA5B2	3	184229585	184242329	0.0548987	2.06284	0.0391278	Pituitary
DMKN	19	35497220	35513658	0.185143	2.0625	0.0391601	Thyroid
FCF1	14	74713144	74738620	0.0221518	2.06191	0.0392162	Whole_Blood
LASP1	17	38869859	38921770	0.0172498	2.06174	0.0392321	Thyroid
GHR	5	42423439	42721878	0.0622522	2.06162	0.0392436	Thyroid
ANKK1	11	113387779	113400416	0.174701	-2.06158	0.039248	Whole_Blood
SCRIB	8	143790920	143815773	0.0462018	2.06139	0.0392655	Pituitary
ABCC1	16	15949138	16143257	0.0832403	-2.06131	0.0392739	Pituitary
SPATA5	4	122923070	123319433	0.041855	2.06055	0.0393461	Thyroid
RNLS	10	88273864	88584530	0.0288951	-2.06006	0.0393924	Brain_Hypothalamus
KREMEN2	16	2964216	2968380	0.0252662	-2.05982	0.0394157	Brain_Hypothalamus
HIST1H2AE	6	26216921	26217437	0.07269	-2.0597	0.0394274	Whole_Blood
ROCK2	2	11179759	11348330	0.0317675	-2.05936	0.0394598	Thyroid
RNASEH2C	11	65714005	65720818	0.183538	2.05927	0.0394684	Thyroid
BMP1	8	22165140	22212326	0.0358975	2.05833	0.0395583	Thyroid
ITPKC	19	40717112	40740860	0.109202	-2.05821	0.0395698	Thyroid
ZNF441	19	11767000	11784078	0.0435722	2.05813	0.0395779	Pituitary
CAAP1	9	26840685	26892803	0.0714243	2.05803	0.0395868	Pituitary
OLFML1	11	7485388	7511377	0.0197791	-2.05783	0.0396067	Whole_Blood
CYB5R3	22	42615730	42720870	0.205759	-2.05723	0.0396641	Thyroid
LINC01003	7	152463786	152465549	0.200574	-2.05713	0.0396736	Thyroid
DERL3	22	23834503	23839128	0.0469171	-2.05665	0.0397202	Whole_Blood
WSB1	17	27294076	27315926	0.0194775	2.05646	0.039738	Thyroid
MRPS30-DT	5	44742420	44808777	0.065003	-2.05553	0.0398277	Brain_Hypothalamus
FANCD2	3	10026370	10101932	0.0827074	2.0554	0.0398401	Whole_Blood
EEPD1	7	36153254	36301538	0.0661099	-2.0546	0.0399178	Whole_Blood
AEBP1	7	44104345	44114562	0.068551	2.05445	0.0399323	Thyroid
CDHR2	5	176542511	176595974	0.02306	-2.05436	0.0399404	Brain_Hypothalamus
PDXDC1	16	14974591	15139339	0.125809	-2.05435	0.0399415	Brain_Hypothalamus
EVA1C	21	32412006	32515397	0.113528	-2.05382	0.0399933	Whole_Blood
TTC39A-AS1	1	51329654	51335324	0.0245422	-2.05335	0.0400384	Pituitary
FGFBP2	4	15960245	15969309	0.0640657	-2.05321	0.040052	Thyroid
AADAT	4	170060222	170091699	0.175503	-2.05266	0.0401059	Thyroid
ACPP	3	132317369	132368302	0.161971	2.05242	0.0401285	Whole_Blood
WNT7B	22	45920366	45977162	0.0345363	-2.05231	0.04014	Thyroid
ING4	12	6650301	6663142	0.0162807	-2.05229	0.0401413	Thyroid
ZNF720	16	31713229	31794869	0.0804524	-2.05211	0.0401589	Brain_Hypothalamus
QKI	6	163414000	163578592	0.251772	-2.05182	0.0401876	Whole_Blood
COL6A6	3	130517177	130677044	0.0125185	2.05154	0.0402139	Thyroid
TGIF1	18	3411608	3459978	0.0255166	2.05137	0.040231	Whole_Blood
PPP1R14B	11	64244479	64246943	0.0596535	2.0513	0.0402377	Thyroid
AP2A2	11	924881	1012245	0.0358703	-2.05072	0.0402943	Thyroid
ZNF691	1	42846573	42852477	0.0113559	2.05036	0.0403296	Whole_Blood
GTF2H4	6	30908207	30914106	0.162736	-2.04999	0.0403652	Brain_Hypothalamus
HPS1	10	98410939	98446963	0.0974318	2.04982	0.0403818	Brain_Hypothalamus
ALOX15	17	4630919	4642294	0.070715	2.04869	0.0404924	Whole_Blood
CXCR1	2	218162841	218166962	0.046954	2.04842	0.0405188	Whole_Blood
MDH1	2	63588609	63607197	0.0290947	2.04779	0.0405809	Pituitary
SYCE3	22	50551112	50562919	0.437986	-2.04703	0.0406548	Brain_Hypothalamus
PDGFRL	8	17576433	17644071	0.0888904	-2.04684	0.0406733	Pituitary
WWTR1-AS1	3	149656999	149661364	0.183442	-2.04668	0.0406894	Thyroid
LINC02062	5	98929163	98995013	0.042452	2.04664	0.0406938	Thyroid
HFM1	1	91260766	91404856	0.0342612	2.04607	0.0407495	Pituitary
NICN1	3	49422333	49429326	0.0657298	-2.04592	0.0407641	Brain_Hypothalamus
MLH3	14	75013769	75051532	0.0488743	2.04557	0.040799	Whole_Blood
TSPEAR	21	44497893	44711572	0.0444801	-2.04526	0.0408297	Thyroid
COX8A	11	63974620	63976543	0.014134	2.04515	0.0408402	Thyroid
MS4A7	11	60378485	60395951	0.0151483	2.0451	0.0408448	Whole_Blood
BAZ2B	2	159318979	159616569	0.238844	-2.04303	0.041049	Whole_Blood
NME1	17	51153559	51162428	0.359996	2.04272	0.0410803	Thyroid
KPTN	19	47475150	47484265	0.0269405	-2.04258	0.0410937	Whole_Blood
HID1-AS1	17	74970704	74975728	0.0103036	-2.042	0.041152	Thyroid
LYPLAL1-AS1	1	219409039	219459369	0.0133762	-2.04124	0.041227	Thyroid
ID2-AS1	2	8666636	8681864	0.0251528	-2.04121	0.04123	Brain_Hypothalamus
CRACR2B	11	826144	831991	0.298795	2.04107	0.0412443	Pituitary
LINC02724	11	64449074	64451657	0.0180132	2.04024	0.0413265	Whole_Blood
HOXA5	7	27141052	27143681	0.0941553	2.04013	0.041337	Pituitary
ENDOV	17	80415165	80438086	0.0300254	-2.04009	0.0413418	Whole_Blood
POMGNT2	3	43079229	43106085	0.0806075	-2.03971	0.0413794	Brain_Hypothalamus
ZBTB11	3	101648889	101677135	0.0338258	-2.03909	0.0414407	Pituitary
AP1AR	4	112231740	112273110	0.0879338	-2.03904	0.0414463	Thyroid
METTL16	17	2405562	2511891	0.258685	2.03896	0.041454	Brain_Hypothalamus
RBM15	1	110338506	110346681	0.0294169	2.03885	0.0414646	Whole_Blood
SLITRK6	13	85792790	85806683	0.0186556	2.03885	0.0414647	Thyroid
LINC02363	4	184334292	184353977	0.263964	-2.03867	0.0414834	Whole_Blood
SYNM	15	99098217	99135593	0.0857475	-2.03853	0.0414973	Thyroid
RHOV	15	40872214	40874234	0.0589236	2.03805	0.0415447	Brain_Hypothalamus
LINC01482	17	68591796	68763882	0.324027	2.03763	0.0415867	Thyroid
IWS1	2	127436207	127526886	0.0390052	-2.03708	0.0416424	Thyroid
CLDN4	7	73799542	73832690	0.127043	-2.03703	0.0416469	Brain_Hypothalamus
SHC3	9	89005771	89178818	0.0619113	2.03703	0.0416475	Pituitary
ELL	19	18442663	18522116	0.258143	2.03701	0.0416495	Whole_Blood
CNPY2	12	56309842	56316119	0.0318137	2.03675	0.0416746	Whole_Blood
MTMR10	15	30938941	30991628	0.056005	2.03558	0.0417929	Brain_Hypothalamus
WWTR1	3	149517235	149736714	0.107084	-2.03508	0.0418424	Thyroid
PIGZ	3	196946356	196969060	0.33852	2.03475	0.0418756	Brain_Hypothalamus
HLA-DRB1	6	32577902	32589848	0.205364	-2.03412	0.0419399	Whole_Blood
C1QL4	12	49332409	49337188	0.158643	-2.03411	0.0419401	Pituitary
C5orf63	5	127045235	127073506	0.0330209	-2.03368	0.0419842	Pituitary
MYO7B	2	127535683	127637729	0.271788	2.0335	0.0420019	Whole_Blood
RAD1	5	34905260	34918989	0.0216484	-2.03338	0.042014	Pituitary
LINC01630	18	51346249	51643939	0.0488771	2.0329	0.0420623	Brain_Hypothalamus
BET1L	11	167784	207399	0.0774956	-2.03149	0.0422052	Thyroid
MAP1LC3A	20	34546854	34560345	0.19687	2.03099	0.0422563	Whole_Blood
N6AMT1	21	28872191	28885371	0.264915	2.03066	0.0422894	Brain_Hypothalamus
MAN1B1-DT	9	137084946	137086817	0.241987	-2.03031	0.0423248	Brain_Hypothalamus
PPP1R3G	6	5085341	5089487	0.13681	-2.03028	0.0423281	Whole_Blood
TRAF4	17	28744011	28750956	0.0169202	2.03027	0.042329	Thyroid
RMDN1	8	86468257	86514357	0.306001	-2.03017	0.042339	Whole_Blood
FAM110D	1	26159079	26163962	0.138193	-2.03005	0.0423513	Pituitary
MICOS10	1	19484403	19629821	0.0868662	2.02996	0.0423602	Whole_Blood
KANK4	1	62236165	62319434	0.0223665	-2.02979	0.0423774	Pituitary
AKR1E2	10	4786629	4848062	0.0526802	-2.02957	0.0424	Brain_Hypothalamus
LINC00665	19	36259540	36331770	0.271288	-2.02905	0.0424529	Thyroid
DFFA	1	10456522	10472529	0.048657	-2.02886	0.0424723	Pituitary
SLC25A25-AS1	9	128108581	128118693	0.0307202	2.02875	0.0424837	Pituitary
TOB1	17	50862223	50867978	0.0473106	2.02818	0.0425415	Thyroid
WDFY2	13	51584455	51767709	0.0810869	2.0278	0.0425811	Thyroid
NPR3	5	32689070	32791724	0.0116766	2.02774	0.0425871	Whole_Blood
ZNF503	10	75397830	75401764	0.0433363	2.02766	0.0425951	Brain_Hypothalamus
LAMA5	20	62307955	62367312	0.0693802	2.02761	0.0426003	Whole_Blood
DNAJC3-DT	13	95648711	95676973	0.0729604	2.0274	0.042622	Whole_Blood
C16orf46	16	81053497	81077267	0.101041	2.02725	0.0426366	Thyroid
SPATA41	15	100344047	100350725	0.0681278	2.02724	0.0426376	Brain_Hypothalamus
TNIP1	5	151029945	151093577	0.0243445	-2.02674	0.0426894	Thyroid
MAP9	4	155342658	155376970	0.100978	-2.02646	0.042718	Thyroid
ARHGDIG	16	280450	283010	0.0622728	-2.02603	0.0427613	Thyroid
HLA-A	6	29941260	29949572	0.135862	-2.02591	0.0427741	Brain_Hypothalamus
RIC8A	11	207708	215113	0.167437	2.02586	0.0427788	Whole_Blood
CDC42EP5	19	54465026	54473296	0.018496	2.02568	0.0427981	Thyroid
TPD52L2	20	63865228	63891545	0.0213081	-2.02522	0.042845	Pituitary
EIF2B2	14	75002921	75012366	0.0859465	2.02509	0.0428586	Pituitary
LINC00923	15	97572185	97875650	0.0504803	2.02498	0.0428691	Pituitary
CEBPA-DT	19	33302857	33305054	0.0402867	-2.02462	0.042906	Pituitary
GOLGA5	14	92794305	92839947	0.0239116	-2.02441	0.0429277	Thyroid
BBX	3	107522936	107811339	0.0747154	-2.02372	0.0429993	Whole_Blood
CELSR1	22	46360834	46537620	0.633535	-2.02358	0.0430129	Thyroid
FXYD2	11	117800844	117828698	0.19313	2.02353	0.0430186	Pituitary
NUDT21	16	56429133	56452199	0.0973749	-2.02315	0.0430581	Brain_Hypothalamus
BACH1	21	29194071	29630751	0.0180013	-2.0231	0.0430627	Pituitary
CLDN3	7	73768997	73770270	0.163594	2.02291	0.0430822	Pituitary
GPR75	2	53852912	53859967	0.0312434	-2.02274	0.0431002	Thyroid
A4GALT	22	42692121	42721298	0.0998422	2.02236	0.0431391	Thyroid
DDX31	9	132592997	132670401	0.104758	2.02197	0.043179	Brain_Hypothalamus
XPNPEP1	10	109864766	109923553	0.0511661	-2.02172	0.0432057	Whole_Blood
SLC18A2	10	117241093	117279430	0.0241512	2.02139	0.043239	Pituitary
ADAP1	7	897900	955407	0.037974	2.02128	0.043251	Pituitary
ARHGAP30	1	161046946	161069970	0.0419347	2.02094	0.0432859	Pituitary
ICAM5	19	10289952	10296778	0.107486	-2.02055	0.0433265	Thyroid
ZNF211	19	57630395	57644041	0.0399341	2.01957	0.0434282	Brain_Hypothalamus
ANO8	19	17323223	17334855	0.0618895	-2.01949	0.0434359	Pituitary
GAS6-AS1	13	113815630	113845744	0.168152	-2.01924	0.0434625	Thyroid
MTRF1L	6	152987362	153002709	0.652259	2.01913	0.0434736	Thyroid
TEX14	17	58556678	58692055	0.0207485	2.01907	0.04348	Whole_Blood
CIB2	15	78104606	78131535	0.541497	2.01824	0.0435663	Thyroid
MED1	17	39404285	39451272	0.0303136	-2.01819	0.0435714	Pituitary
SAA4	11	18231355	18236802	0.0243069	-2.0179	0.0436016	Brain_Hypothalamus
AQP11	11	77589391	77610356	0.161871	2.01768	0.0436243	Thyroid
MED24	17	40019097	40061215	0.127428	-2.01768	0.0436247	Whole_Blood
TAOK3	12	118149801	118372907	0.0432943	2.01754	0.0436396	Pituitary
LINC02693	17	21428263	21574517	0.0314537	2.01725	0.0436699	Brain_Hypothalamus
TMEM74	8	108606850	108787594	0.0265873	-2.0171	0.0436852	Brain_Hypothalamus
B9D1	17	19334308	19378193	0.03329	2.01694	0.0437021	Brain_Hypothalamus
GRIN2C	17	74842023	74861504	0.0158217	2.01639	0.0437595	Thyroid
KIF11	10	92574105	92655395	0.0217856	2.01581	0.04382	Pituitary
TSTD1	1	161037631	161038977	0.0201407	2.01514	0.0438901	Whole_Blood
CHN1	2	174798809	175005381	0.0118128	-2.01479	0.0439264	Whole_Blood
IQCH	15	67254786	67502260	0.208336	2.01478	0.0439281	Thyroid
SOGA1	20	36777447	36863538	0.078379	-2.01469	0.0439369	Brain_Hypothalamus
CENPN	16	81006552	81033114	0.120496	2.01442	0.0439653	Thyroid
EGLN2	19	40798996	40808434	0.299442	2.0143	0.0439782	Whole_Blood
LINC01816	2	70124034	70132923	0.0133005	2.01419	0.0439893	Thyroid
TNFRSF10A	8	23190452	23225102	0.147804	2.01386	0.0440243	Whole_Blood
SELENOF	1	86862445	86914424	0.113627	-2.01375	0.0440361	Brain_Hypothalamus
LIPC-AS1	15	58434890	58498735	0.101475	-2.0137	0.0440415	Thyroid
FRG1-DT	4	189764391	189940733	0.418208	-2.01251	0.044166	Thyroid
HS3ST2	16	22814162	22916338	0.0214318	2.01237	0.0441807	Pituitary
ROR2	9	91563091	91950228	0.101529	2.01229	0.0441893	Thyroid
CTU1	19	51097606	51108409	0.0416802	-2.01223	0.044196	Brain_Hypothalamus
JMJD7	15	41828092	41837581	0.144365	2.01202	0.0442182	Brain_Hypothalamus
RASEF	9	82979590	83063177	0.0332577	-2.01172	0.04425	Thyroid
ST20-AS1	15	79922771	79926993	0.0143956	-2.01158	0.0442646	Thyroid
STRBP	9	123109500	123268586	0.0113963	2.01157	0.0442652	Whole_Blood
CFDP1	16	75293698	75433503	0.0389774	2.01152	0.0442708	Brain_Hypothalamus
LINC01537	11	72570660	72573229	0.0164807	-2.01143	0.04428	Whole_Blood
DNAJC21	5	34929559	34958964	0.132807	2.0114	0.0442833	Thyroid
TRUB2	9	128305159	128322447	0.0101425	-2.01005	0.0444256	Thyroid
C11orf65	11	108308519	108467531	0.0141453	-2.00977	0.0444557	Whole_Blood
PNMA8C	19	46424697	46428936	0.125211	-2.00907	0.0445295	Brain_Hypothalamus
CSPG5	3	47562238	47580792	0.0523941	-2.00895	0.0445425	Brain_Hypothalamus
NAMA	9	99355337	99377240	0.0159798	-2.00881	0.044557	Thyroid
AP5B1	11	65773898	65780976	0.0417584	-2.00819	0.0446228	Thyroid
PRKCQ-AS1	10	6580419	6616921	0.174508	2.00713	0.0447358	Whole_Blood
NELFCD	20	58981208	58995133	0.358678	2.00703	0.044747	Thyroid
RNF213-AS1	17	80351828	80415168	0.049472	-2.00686	0.0447646	Whole_Blood
SREBF2	22	41833105	41907306	0.0344751	2.00606	0.0448499	Pituitary
CYP27C1	2	127183832	127220313	0.0317309	-2.00595	0.0448616	Thyroid
LAMC1-AS1	1	183138402	183141282	0.0425693	-2.00585	0.0448723	Thyroid
CYSRT1	9	137225174	137226315	0.0253788	-2.00579	0.0448788	Whole_Blood
DENND4B	1	153929501	153946718	0.135992	2.00515	0.0449466	Brain_Hypothalamus
AFMID	17	78187358	78207702	0.0483675	-2.00502	0.0449609	Thyroid
VCPKMT	14	50108632	50116600	0.122736	-2.00492	0.0449715	Pituitary
MYO5A	15	52307281	52529132	0.0472093	2.0049	0.0449733	Whole_Blood
HTR1F	3	87792706	87993839	0.121266	-2.00485	0.0449789	Thyroid
OXER1	2	42762499	42764135	0.342694	2.00381	0.0450906	Pituitary
ARHGEF33	2	38889875	38975454	0.0783402	-2.00327	0.0451485	Pituitary
ARMC9	2	231198546	231376848	0.085846	-2.00305	0.045172	Thyroid
CHD2	15	92886203	93027996	0.0171709	2.00214	0.0452697	Pituitary
CTNNB1	3	41194741	41260096	0.101436	-2.00207	0.0452767	Brain_Hypothalamus
PIFO	1	111346600	111353013	0.163262	-2.00167	0.04532	Thyroid
UBP1	3	33388336	33441371	0.141365	-2.00143	0.0453457	Pituitary
GRIN2D	19	48393668	48444931	0.0361666	2.00137	0.045353	Whole_Blood
ESRRA	11	64305497	64316743	0.0496378	2.001	0.0453927	Brain_Hypothalamus
FOXL2NB	3	138947217	138953990	0.110022	2.00097	0.0453956	Pituitary
C3orf33	3	155762617	155806278	0.0783765	-2.00075	0.0454191	Thyroid
OLMALINC	10	100373099	100454043	0.045529	-2.00054	0.045442	Thyroid
GRIN3A	9	101569352	101738647	0.201344	-2.00032	0.0454653	Pituitary
PLIN4	19	4502192	4518486	0.0529643	2.00006	0.0454934	Whole_Blood
LIMS4	2	110445883	110473075	0.0389046	1.99998	0.0455027	Pituitary
TEKT5	16	10627501	10694930	0.215662	-1.99993	0.0455077	Thyroid
EIF2B5	3	184135038	184146127	0.0812578	1.99956	0.0455476	Brain_Hypothalamus
SVOPL	7	138594285	138701362	0.0295946	1.99933	0.045573	Thyroid
PRG2	11	57386780	57390650	0.181082	-1.99877	0.0456337	Thyroid
CADPS2	7	122318411	122886759	0.0289043	1.99822	0.0456931	Thyroid
DUOX2	15	45092650	45114172	0.0544578	-1.99806	0.0457103	Brain_Hypothalamus
KCNT1	9	135702185	135795508	0.0347884	1.99802	0.0457148	Whole_Blood
SH2D7	15	78077808	78104370	0.0442394	1.99755	0.0457652	Thyroid
RNASE4	14	20684560	20701216	0.269919	1.99724	0.045799	Whole_Blood
SEMA4D	9	89360787	89498130	0.0274324	1.99684	0.0458424	Brain_Hypothalamus
ZKSCAN4	6	28241697	28252269	0.0240775	1.99678	0.0458489	Pituitary
ARRDC1	9	137605685	137615360	0.190671	1.99623	0.0459088	Pituitary
KIF13A	6	17759183	17987635	0.109906	1.99603	0.0459302	Thyroid
MRI1	19	13764522	13774282	0.147485	1.99591	0.0459434	Whole_Blood
MGST2	4	139665768	139740745	0.0493156	-1.99465	0.0460812	Thyroid
LINC02696	11	45355371	45367577	0.377612	1.99434	0.046115	Brain_Hypothalamus
CPSF3	2	9423651	9473101	0.0405992	1.99421	0.0461291	Whole_Blood
BLK	8	11486894	11564599	0.0132142	-1.99419	0.0461316	Thyroid
KMT2E-AS1	7	105013277	105014321	0.0184644	1.99356	0.0462002	Pituitary
DHRS7B	17	21123364	21193265	0.031321	-1.99332	0.046226	Brain_Hypothalamus
FGR	1	27612064	27635185	0.038429	-1.99324	0.0462349	Brain_Hypothalamus
NT5DC1	6	116100851	116249497	0.058072	1.99298	0.0462641	Pituitary
SLC12A4	16	67943474	67969601	0.0186607	1.99234	0.0463335	Thyroid
MYH7B	20	34955810	35002437	0.120418	1.99226	0.0463424	Thyroid
SEC23B	20	18507520	18561415	0.31359	-1.99213	0.0463566	Thyroid
POLDIP2	17	28346633	28357527	0.241888	-1.99156	0.046419	Brain_Hypothalamus
LINC01415	18	55776727	55781722	0.0351188	1.99151	0.0464249	Brain_Hypothalamus
SPRED1	15	38252836	38357249	0.0403227	1.99147	0.046429	Pituitary
RGS5	1	163111121	163321791	0.0305083	-1.99137	0.0464401	Thyroid
ZNF195	11	3339261	3379222	0.184235	-1.99129	0.0464486	Pituitary
SPRYD4	12	56468578	56479708	0.234954	1.99116	0.046463	Whole_Blood
PRR5L	11	36296288	36465204	0.0261443	1.99101	0.04648	Whole_Blood
PTOV1	19	49850735	49860744	0.0387067	1.99089	0.0464932	Whole_Blood
ICAM1	19	10271093	10286615	0.0612785	1.99063	0.0465212	Whole_Blood
CENPO	2	24793136	24822376	0.32145	-1.98984	0.0466081	Whole_Blood
MSH6	2	47695530	47810063	0.156385	-1.98946	0.0466505	Whole_Blood
GIMAP2	7	150685697	150693641	0.0464281	-1.98843	0.0467645	Whole_Blood
PYGB	20	25248085	25298012	0.12743	1.98765	0.0468507	Thyroid
SAMD10	20	63974116	63980008	0.0183526	-1.98746	0.0468713	Pituitary
LTBP3	11	65538559	65558930	0.0626104	1.98703	0.0469192	Thyroid
C2orf15	2	99141707	99151669	0.0408508	1.98679	0.0469452	Whole_Blood
ANKMY2	7	16599779	16645817	0.0412076	1.98665	0.0469612	Thyroid
ATXN8OS	13	70107213	70171738	0.0647863	-1.98653	0.0469742	Pituitary
CEP164	11	117314557	117413266	0.180435	-1.98638	0.0469909	Whole_Blood
MRPL40	22	19432545	19436075	0.0499826	1.98569	0.0470676	Whole_Blood
RGL4	22	23688136	23699176	0.0423869	1.98554	0.0470848	Thyroid
GJB3	1	34781214	34786369	0.162201	1.98545	0.0470947	Thyroid
RAB4B	19	40778216	40796942	0.0672999	-1.98488	0.0471584	Whole_Blood
RPS11	19	49496365	49499708	0.0398278	1.98451	0.047199	Brain_Hypothalamus
VRK2	2	57907629	58159920	0.0618276	-1.98375	0.0472832	Thyroid
CPLANE2	1	16231692	16237183	0.110749	1.98363	0.0472969	Thyroid
SECTM1	17	82321024	82334074	0.0778123	1.98282	0.047387	Thyroid
ARG2	14	67619920	67651708	0.0508361	-1.98262	0.0474104	Brain_Hypothalamus
NKTR	3	42600655	42648735	0.28489	1.98247	0.0474261	Thyroid
LAT2	7	74199652	74229834	0.107055	-1.98247	0.0474267	Whole_Blood
ANGEL1	14	76786009	76826246	0.0982052	1.98239	0.0474353	Whole_Blood
COL26A1	7	101362875	101559024	0.357297	-1.98239	0.0474356	Brain_Hypothalamus
KCNV2	9	2717510	2730037	0.0258278	-1.98237	0.0474378	Thyroid
USO1	4	75724577	75814286	0.17407	1.98195	0.0474849	Thyroid
SIRT1	10	67884656	67918390	0.234967	1.98188	0.0474928	Whole_Blood
NRIP3	11	8965682	9005288	0.0212374	-1.98148	0.047538	Pituitary
HOTAIRM1	7	27095647	27100265	0.594216	-1.98147	0.0475389	Whole_Blood
ASXL2	2	25733753	25878487	0.165265	-1.98135	0.0475519	Thyroid
SAP30	4	173369969	173377532	0.0289249	1.98134	0.0475534	Pituitary
CACTIN-AS1	19	3607247	3613930	0.0271456	1.98126	0.0475621	Pituitary
ARHGEF25	12	57610180	57617245	0.180432	1.98037	0.0476623	Thyroid
PPM1K	4	88257620	88284769	0.0127945	1.98012	0.0476895	Whole_Blood
GSDMB	17	39904595	39919854	0.42727	1.98	0.0477039	Whole_Blood
ABCA2	9	137007234	137028915	0.0580372	1.97986	0.0477188	Pituitary
ZNF677	19	53235381	53254898	0.0727507	1.97956	0.0477529	Whole_Blood
GYPC	2	126656133	126696667	0.0492448	-1.97885	0.0478334	Pituitary
TRIM38	6	25962802	25991231	0.112592	1.9785	0.047872	Whole_Blood
ATG5	6	106045423	106325791	0.0198939	1.97821	0.0479049	Whole_Blood
NMNAT1	1	9943428	9985501	0.0923947	1.9781	0.0479175	Pituitary
SLA	8	133036728	133102912	0.0424323	-1.97765	0.0479683	Whole_Blood
ZNHIT1	7	101218165	101224190	0.241109	-1.97735	0.0480023	Thyroid
MBOAT2	2	8852690	9003709	0.0135045	-1.97714	0.0480262	Whole_Blood
ITGA4	2	181457202	181538940	0.255722	-1.97603	0.0481514	Whole_Blood
SSBP4	19	18418864	18434562	0.0395574	-1.97544	0.0482179	Brain_Hypothalamus
CLEC4A	12	8123617	8138607	0.0550449	-1.9746	0.0483137	Pituitary
AGAP3	7	151085831	151144436	0.0358666	1.97401	0.0483803	Thyroid
LINC02827	12	3318718	3325343	0.0172724	1.97313	0.0484812	Pituitary
SMIM20	4	25861830	25929813	0.0836491	1.9731	0.0484841	Whole_Blood
BGLAP	1	156242184	156243317	0.0228961	-1.97294	0.0485023	Whole_Blood
CTU2	16	88706483	88715396	0.116216	-1.97294	0.0485023	Brain_Hypothalamus
MLX	17	42567072	42573239	0.0445577	-1.9729	0.0485067	Thyroid
WBP2	17	75845699	75856507	0.0191222	-1.97284	0.0485141	Whole_Blood
TTC25	17	41930617	41966503	0.0328642	-1.97168	0.0486462	Brain_Hypothalamus
SARM1	17	28364356	28404049	0.0849391	-1.97152	0.0486641	Thyroid
BISPR	19	17405686	17419324	0.0908593	1.97147	0.0486705	Pituitary
TNFAIP8L1	19	4639516	4655568	0.110932	-1.97061	0.0487687	Pituitary
TLE6	19	2977538	2995179	0.171947	-1.9704	0.0487925	Thyroid
ZNF783	7	149262171	149297302	0.118448	1.96976	0.0488658	Whole_Blood
IPO8	12	30628988	30695869	0.105719	-1.96924	0.048926	Whole_Blood
PFKFB4	3	48517684	48562015	0.0834949	-1.96916	0.0489343	Brain_Hypothalamus
GALNT6	12	51351247	51392867	0.0379888	1.96882	0.0489738	Thyroid
PAGR1	16	29816152	29822489	0.0751085	-1.96879	0.0489777	Pituitary
CYGB	17	76527356	76551175	0.0303703	-1.96878	0.0489786	Thyroid
F5	1	169511951	169586588	0.218514	-1.96876	0.0489809	Whole_Blood
IFIT3	10	89327307	89377473	0.023757	1.96857	0.0490028	Thyroid
DOLK	9	128945530	128947603	0.0126004	1.968	0.0490684	Whole_Blood
GPC5	13	91398621	92873682	0.064367	-1.96787	0.0490834	Thyroid
YES1	18	721588	812546	0.0507574	-1.96776	0.0490954	Thyroid
PARD6G-AS1	18	80147908	80179839	0.0638523	-1.96757	0.0491176	Whole_Blood
AARSD1	17	42950526	42964498	0.0345231	-1.96702	0.0491815	Thyroid
CLPX	15	65148219	65185342	0.0265223	-1.96658	0.0492317	Brain_Hypothalamus
RPA1	17	1829702	1900082	0.18364	-1.96646	0.0492453	Thyroid
ZCWPW2	3	28348721	28538122	0.0285927	1.96612	0.0492848	Thyroid
[truncated: 13,817 more rows]
