# Supplementary material for: Large-scale association analysis identified novel differentiated thyroid carcinoma risk loci by integrating transcriptome and proteome
Source: Research Square preprint supplement (doi:10.21203/rs.3.rs-6751995/v1), 2025-07-18
Supplement: Supplementary file 11 [file e36b4eefcb0bf14585afa253.xlsx]

## Sheet: Contents
	Contents
	Supplementary Table 1	Genome-wide association study analysis result that are identified across all studies
	Supplementary Table 2	Transcriptome-wide association study results using thyroid-relevant tissues from GTEx including thyroid, whole blood, pituatary, and brain hypothalamus
	Supplementary Table 3	Result of Baysian colocalization analysis of transcriptome (eQTLs) with differentiated thyroid carcinoma (DTC)
	Supplementary Table 4	FOCUS fine mapping analysis results of DTC identified genes across 49 tissues
	Supplementary Table 5	Results of transcriptome-wide association study (TWAS) using all 49 available tissues from GTEx
	Supplementary Table 6	Results of transcriptome-wide association study (TWAS) using thyroid cancer tissue from TCGA databse
	Supplementary Table 7	Results of brain and plasma blood proteome-wide association study (PWAS) using ROSMAP and AIRC study
	Supplementary Table 8	Result of Baysian colocalization analysis of proteome (pQTL) with differentiated thyroid carcinoma (DTC)
	Supplementary Table 9	Gene Set Enrichment Analysis of pathways and biological processes associated with identified genes from GWAS, TWAS and PWAS
	Supplementary Table 10	Effect estimates used in the PRS model in the study group EPIC and EPITYHR
	Supplementary Table 11	Comparison of MR casual estimates between MVMR and IVW (different clumping thresholds)

## Sheet: S9
Supplementary Table 9. Gene Set Enrichment Analysis of pathways and biological processes associated with identified genes from GWAS, TWAS and PWAS
List of genes used: NRG1; TRMO; PTCSC3; SMAD3; STN1; AAGAB; ACTRT3; TRIM14; SDCCAG8; LRRC34; CEP170; SAMD4A; TMOD1; RAD51-AS1; SAXO1; LRRIQ4; CHST14; MAFTRR; ZNF257; CCDC32; HAUS6; RMDN3; MECOM; HEMGN; CORO2A; MPHOSPH6; ANP32B; NFIA; TGFB2; PCNX2; DIRC3; TERT; EPB41L4A; JADE2; POLR1C; GPR37; TG; PTCSC2; DLG5; PCNPP3; RAD51; ZFHX3-AS1; YES1; INSR; CHEK2; NANS; MTHFR; KDELC2; EIF2AK4; JAG1
Term	Oncology	Overlap	P.value	Adjusted.P.value	Odds.Ratio	Combined.Score	Genes
Cellular Response To Cold (GO:0070417)	GO BP	2/5	6.09568e-05	0.0176091	277.042	2688.79	EIF2AK4;SAXO1
Regulation Of Transforming Growth Factor Beta2 Production (GO:0032909)	GO BP	2/6	9.12893e-05	0.0176091	207.771	1932.58	TGFB2;SMAD3
Ventricular Trabecula Myocardium Morphogenesis (GO:0003222)	GO BP	2/7	0.000127601	0.0176091	166.208	1490.32	TGFB2;NRG1
Positive Regulation Of Cardiac Epithelial To Mesenchymal Transition (GO:0062043)	GO BP	2/7	0.000127601	0.0176091	166.208	1490.32	TGFB2;JAG1
Positive Regulation Of miRNA Transcription (GO:1902895)	GO BP	3/43	0.000169089	0.0176091	31.7713	275.936	TGFB2;SMAD3;TERT
Cardioblast Differentiation (GO:0010002)	GO BP	2/8	0.000169863	0.0176091	138.5	1202.25	TGFB2;NRG1
Positive Regulation Of Epithelial To Mesenchymal Transition (GO:0010718)	GO BP	3/47	0.000220611	0.0194208	28.8772	243.12	TGFB2;JAG1;SMAD3
Positive Regulation Of miRNA Metabolic Process (GO:2000630)	GO BP	3/49	0.000249786	0.0194208	27.6189	229.096	TGFB2;SMAD3;TERT
Cardiac Right Ventricle Morphogenesis (GO:0003215)	GO BP	2/12	0.000397841	0.0265438	83.0833	650.498	TGFB2;JAG1
Regulation Of miRNA Transcription (GO:1902893)	GO BP	3/59	0.000433069	0.0265438	22.6755	175.613	TGFB2;SMAD3;TERT
Cardiocyte Differentiation (GO:0035051)	GO BP	2/13	0.000469425	0.0265438	75.5265	578.835	TGFB2;NRG1
Regulation Of Transforming Growth Factor Beta Production (GO:0071634)	GO BP	2/16	0.000718739	0.0351666	59.3333	429.455	TGFB2;SMAD3
Regulation Of Nucleic Acid-Templated Transcription (GO:1903506)	GO BP	6/452	0.000882709	0.0351666	5.96331	41.9371	SMAD3;NFIA;CHEK2;INSR;JADE2;ZNF257
Heart Trabecula Morphogenesis (GO:0061384)	GO BP	2/18	0.000913471	0.0351666	51.9115	363.29	TGFB2;NRG1
Pulmonary Valve Morphogenesis (GO:0003184)	GO BP	2/18	0.000913471	0.0351666	51.9115	363.29	TGFB2;JAG1
Positive Regulation Of Immune Response (GO:0050778)	GO BP	3/80	0.0010549	0.0351666	16.4739	112.917	TGFB2;NRG1;EIF2AK4
Wound Healing (GO:0042060)	GO BP	3/80	0.0010549	0.0351666	16.4739	112.917	TGFB2;SMAD3;NRG1
Activation Of Protein Kinase Activity (GO:0032147)	GO BP	3/81	0.00109355	0.0351666	16.2619	110.879	TGFB2;INSR;NRG1
Pulmonary Valve Development (GO:0003177)	GO BP	2/20	0.00113076	0.0351666	46.1389	313.046	TGFB2;JAG1
Myoblast Differentiation (GO:0045445)	GO BP	2/20	0.00113076	0.0351666	46.1389	313.046	JAG1;NRG1
Regulation Of Gene Expression (GO:0010468)	GO BP	9/1127	0.00171643	0.0479	3.69754	23.5441	TGFB2;SMAD3;TERT;NFIA;CHEK2;INSR;NRG1;JADE2;ZNF257
Negative Regulation Of Cell Differentiation (GO:0045596)	GO BP	4/207	0.00176906	0.0479	8.45877	53.6058	SMAD3;JAG1;EIF2AK4;ANP32B
Activation Of Protein Kinase B Activity (GO:0032148)	GO BP	2/25	0.00177122	0.0479	36.0996	228.73	INSR;NRG1
Telomere Maintenance Via Telomere Lengthening (GO:0010833)	GO BP	2/26	0.00191577	0.0493399	34.5938	216.475	RAD51;TERT
Hemopoiesis (GO:0030097)	GO BP	3/101	0.00206243	0.0493399	12.9301	79.958	TGFB2;JAG1;MECOM
Positive Regulation Of Nitric Oxide Biosynthetic Process (GO:0045429)	GO BP	2/27	0.00206573	0.0493399	33.2083	205.303	SMAD3;INSR
Positive Regulation Of Nitric Oxide Metabolic Process (GO:1904407)	GO BP	2/28	0.00222109	0.0493399	31.9295	195.081	SMAD3;INSR
Primary Neural Tube Formation (GO:0014020)	GO BP	2/28	0.00222109	0.0493399	31.9295	195.081	TGFB2;MTHFR
Tube Closure (GO:0060606)	GO BP	2/29	0.00238181	0.0510858	30.7454	185.699	TGFB2;MTHFR
Regulation Of Cell Growth (GO:0001558)	GO BP	4/227	0.00247299	0.0511219	7.69234	46.1719	TGFB2;SMAD3;NRG1;JADE2
Artery Morphogenesis (GO:0048844)	GO BP	2/30	0.00254788	0.0511219	29.6458	177.06	TGFB2;JAG1
Positive Regulation Of Cellular Component Organization (GO:0051130)	GO BP	3/113	0.00283743	0.0531784	11.5126	67.5196	TGFB2;INSR;NRG1
Neural Tube Closure (GO:0001843)	GO BP	2/32	0.00289592	0.0531784	27.6667	161.697	TGFB2;MTHFR
Ventricular Cardiac Muscle Tissue Morphogenesis (GO:0055010)	GO BP	2/33	0.00307785	0.0531784	26.7728	154.841	TGFB2;NRG1
Positive Regulation Of Notch Signaling Pathway (GO:0045747)	GO BP	2/33	0.00307785	0.0531784	26.7728	154.841	TGFB2;JAG1
Regulation Of Cell Adhesion Mediated By Integrin (GO:0033628)	GO BP	2/33	0.00307785	0.0531784	26.7728	154.841	TGFB2;NRG1
Positive Regulation Of Macromolecule Biosynthetic Process (GO:0010557)	GO BP	3/122	0.0035221	0.0592093	10.637	60.0855	TGFB2;INSR;SAMD4A
Negative Regulation Of Growth (GO:0045926)	GO BP	3/124	0.00368675	0.0601397	10.4602	58.6084	TGFB2;SMAD3;NRG1
Negative Regulation Of Cell Growth (GO:0030308)	GO BP	3/125	0.00377082	0.0601397	10.3739	57.8912	TGFB2;SMAD3;NRG1
Heterochromatin Organization (GO:0070828)	GO BP	2/39	0.00427841	0.0645646	22.4245	122.307	MECOM;MTHFR
Regulation Of Nitric Oxide Biosynthetic Process (GO:0045428)	GO BP	2/39	0.00427841	0.0645646	22.4245	122.307	SMAD3;INSR
Positive Regulation Of Signal Transduction (GO:0009967)	GO BP	4/266	0.00435967	0.0645646	6.53435	35.5165	TGFB2;JAG1;TERT;DLG5
Cardiac Ventricle Morphogenesis (GO:0003208)	GO BP	2/42	0.00494759	0.0715675	20.7396	110.103	TGFB2;JAG1
Learning (GO:0007612)	GO BP	2/43	0.00518069	0.0732361	20.2327	106.481	INSR;EIF2AK4
Epithelial To Mesenchymal Transition (GO:0001837)	GO BP	2/47	0.00616259	0.0851807	18.4306	93.7978	TGFB2;DLG5
SMAD Protein Signal Transduction (GO:0060395)	GO BP	2/51	0.0072225	0.0976608	16.9226	83.4379	TGFB2;SMAD3
Positive Regulation Of MAPK Cascade (GO:0043410)	GO BP	4/310	0.00744718	0.0985563	5.58227	27.3527	TGFB2;GPR37;INSR;NRG1
Protein Autophosphorylation (GO:0046777)	GO BP	3/162	0.00773816	0.100274	7.945	38.6254	CHEK2;INSR;EIF2AK4
Mesenchymal Cell Differentiation (GO:0048762)	GO BP	2/54	0.00806767	0.100793	15.9439	76.8479	TGFB2;DLG5
Protein Modification Process (GO:0036211)	GO BP	6/711	0.00830535	0.100793	3.72244	17.8337	TGFB2;YES1;CHEK2;INSR;JADE2;EIF2AK4
Memory (GO:0007613)	GO BP	2/58	0.00926028	0.100793	14.8021	69.3037	INSR;EIF2AK4
Positive Regulation Of Cellular Biosynthetic Process (GO:0031328)	GO BP	3/174	0.00940226	0.100793	7.38298	34.4549	SMAD3;INSR;SAMD4A
Heart Morphogenesis (GO:0003007)	GO BP	2/59	0.00957001	0.100793	14.5417	67.606	TGFB2;INSR
Positive Regulation Of Cell Junction Assembly (GO:1901890)	GO BP	2/61	0.0102032	0.100793	14.0473	64.4077	DLG5;NRG1
Cell Junction Organization (GO:0034330)	GO BP	2/62	0.0105266	0.100793	13.8125	62.9001	TGFB2;SMAD3
Negative Regulation Of Cellular Process (GO:0048523)	GO BP	5/537	0.0107413	0.100793	4.05556	18.3865	TGFB2;SMAD3;DLG5;NRG1;ANP32B
Negative Regulation Of Macromolecule Metabolic Process (GO:0010605)	GO BP	3/186	0.0112604	0.100793	6.89466	30.9327	TGFB2;SMAD3;TERT
Regulation Of Cell Population Proliferation (GO:0042127)	GO BP	6/766	0.0117274	0.100793	3.44318	15.3078	TGFB2;SMAD3;JAG1;INSR;DLG5;NRG1
Extrinsic Apoptotic Signaling Pathway (GO:0097191)	GO BP	2/67	0.0122108	0.100793	12.7468	56.1552	TGFB2;SMAD3
Activation Of Cysteine-Type Endopeptidase Activity Involved In Apoptotic Process (GO:0006919)	GO BP	2/67	0.0122108	0.100793	12.7468	56.1552	SMAD3;ANP32B
Establishment Of Protein Localization To Telomere (GO:0070200)	GO BP	1/5	0.0124388	0.100793	101.765	446.438	TERT
Negative Regulation Of Lamellipodium Organization (GO:1902744)	GO BP	1/5	0.0124388	0.100793	101.765	446.438	NRG1
Heme Transport (GO:0015886)	GO BP	1/5	0.0124388	0.100793	101.765	446.438	NRG1
Activation Of Transmembrane Receptor Protein Tyrosine Kinase Activity (GO:0007171)	GO BP	1/5	0.0124388	0.100793	101.765	446.438	NRG1
Iron Coordination Entity Transport (GO:1901678)	GO BP	1/5	0.0124388	0.100793	101.765	446.438	NRG1
Positive Regulation Of Translation In Response To Stress (GO:0032056)	GO BP	1/5	0.0124388	0.100793	101.765	446.438	EIF2AK4
Dermatan Sulfate Metabolic Process (GO:0030205)	GO BP	1/5	0.0124388	0.100793	101.765	446.438	CHST14
Dermatan Sulfate Proteoglycan Metabolic Process (GO:0050655)	GO BP	1/5	0.0124388	0.100793	101.765	446.438	CHST14
Regulation Of Blood Vessel Remodeling (GO:0060312)	GO BP	1/5	0.0124388	0.100793	101.765	446.438	NRG1
Double-Strand Break Repair Via Synthesis-Dependent Strand Annealing (GO:0045003)	GO BP	1/5	0.0124388	0.100793	101.765	446.438	RAD51
Telomere Maintenance (GO:0000723)	GO BP	2/68	0.0125609	0.100793	12.553	54.9467	RAD51;TERT
Cell-Cell Junction Organization (GO:0045216)	GO BP	2/68	0.0125609	0.100793	12.553	54.9467	TGFB2;SMAD3
Positive Regulation Of Phosphatidylinositol 3-Kinase Signaling (GO:0014068)	GO BP	2/69	0.0129154	0.100793	12.365	53.7798	TGFB2;INSR
Regulation Of Notch Signaling Pathway (GO:0008593)	GO BP	2/70	0.0132742	0.100793	12.1826	52.6524	TGFB2;JAG1
Regulation Of Cilium Assembly (GO:1902017)	GO BP	2/71	0.0136374	0.100793	12.0054	51.5627	SAXO1;SDCCAG8
Transforming Growth Factor Beta Receptor Signaling Pathway (GO:0007179)	GO BP	2/72	0.0140048	0.100793	11.8333	50.5089	TGFB2;SMAD3
Positive Regulation Of Protein Localization To Nucleus (GO:1900182)	GO BP	2/72	0.0140048	0.100793	11.8333	50.5089	SMAD3;TERT
Negative Regulation Of Cell Adhesion (GO:0007162)	GO BP	2/72	0.0140048	0.100793	11.8333	50.5089	JAG1;NRG1
Negative Regulation Of Cell Population Proliferation (GO:0008285)	GO BP	4/379	0.0147316	0.100793	4.53913	19.145	TGFB2;SMAD3;DLG5;NRG1
Gland Development (GO:0048732)	GO BP	2/74	0.0147525	0.100793	11.5035	48.5026	TG;NRG1
Positive Regulation Of Immune Response To Tumor Cell (GO:0002839)	GO BP	1/6	0.0149083	0.100793	81.4082	342.39	NRG1
Regulation Of Extracellular Matrix Assembly (GO:1901201)	GO BP	1/6	0.0149083	0.100793	81.4082	342.39	SMAD3
Gland Morphogenesis (GO:0022612)	GO BP	1/6	0.0149083	0.100793	81.4082	342.39	TGFB2
Glomerular Epithelial Cell Development (GO:0072310)	GO BP	1/6	0.0149083	0.100793	81.4082	342.39	JAG1
SMAD Protein Complex Assembly (GO:0007183)	GO BP	1/6	0.0149083	0.100793	81.4082	342.39	SMAD3
Histone H4-K12 Acetylation (GO:0043983)	GO BP	1/6	0.0149083	0.100793	81.4082	342.39	JADE2
Cardiac Muscle Cell Myoblast Differentiation (GO:0060379)	GO BP	1/6	0.0149083	0.100793	81.4082	342.39	NRG1
Pharyngeal Arch Artery Morphogenesis (GO:0061626)	GO BP	1/6	0.0149083	0.100793	81.4082	342.39	TGFB2
Regulation Of Striated Muscle Cell Differentiation (GO:0051153)	GO BP	1/6	0.0149083	0.100793	81.4082	342.39	NRG1
Podocyte Development (GO:0072015)	GO BP	1/6	0.0149083	0.100793	81.4082	342.39	JAG1
Positive Regulation Of Blood Circulation (GO:1903524)	GO BP	1/6	0.0149083	0.100793	81.4082	342.39	TGFB2
Cytolysis By Host Of Symbiont Cells (GO:0051838)	GO BP	1/6	0.0149083	0.100793	81.4082	342.39	NRG1
Actomyosin Structure Organization (GO:0031032)	GO BP	2/77	0.0159058	0.102698	11.0417	45.7243	TMOD1;EPB41L4A
Negative Regulation Of Blood Vessel Morphogenesis (GO:2000181)	GO BP	2/77	0.0159058	0.102698	11.0417	45.7243	TGFB2;NRG1
Sulfur Amino Acid Biosynthetic Process (GO:0000097)	GO BP	1/7	0.0173717	0.102698	67.8367	274.936	MTHFR
Regulation Of Epithelial To Mesenchymal Transition Involved In Endocardial Cushion Formation (GO:1905005)	GO BP	1/7	0.0173717	0.102698	67.8367	274.936	TGFB2
Thyroid Gland Development (GO:0030878)	GO BP	1/7	0.0173717	0.102698	67.8367	274.936	TG
Aspartate Family Amino Acid Biosynthetic Process (GO:0009067)	GO BP	1/7	0.0173717	0.102698	67.8367	274.936	MTHFR
Regulation Of Protein Localization To Nucleolus (GO:1904749)	GO BP	1/7	0.0173717	0.102698	67.8367	274.936	TERT
Methionine Metabolic Process (GO:0006555)	GO BP	1/7	0.0173717	0.102698	67.8367	274.936	MTHFR
Monosaccharide Biosynthetic Process (GO:0046364)	GO BP	1/7	0.0173717	0.102698	67.8367	274.936	CHST14
Dendritic Spine Maintenance (GO:0097062)	GO BP	1/7	0.0173717	0.102698	67.8367	274.936	INSR
Dermatan Sulfate Proteoglycan Biosynthetic Process (GO:0050651)	GO BP	1/7	0.0173717	0.102698	67.8367	274.936	CHST14
siRNA Processing (GO:0030422)	GO BP	1/7	0.0173717	0.102698	67.8367	274.936	TERT
Spindle Assembly (GO:0051225)	GO BP	2/81	0.0175017	0.102698	10.4805	42.3984	CHEK2;HAUS6
Positive Regulation Of Growth (GO:0045927)	GO BP	2/81	0.0175017	0.102698	10.4805	42.3984	TGFB2;INSR
Regulation Of Epithelial To Mesenchymal Transition (GO:0010717)	GO BP	2/83	0.0183241	0.10652	10.2207	40.878	TGFB2;SMAD3
Negative Regulation Of Angiogenesis (GO:0016525)	GO BP	2/86	0.0195881	0.10725	9.85417	38.7548	TGFB2;NRG1
Tetrahydrofolate Interconversion (GO:0035999)	GO BP	1/8	0.0198292	0.10725	58.1429	227.955	MTHFR
Regulation Of miRNA Metabolic Process (GO:2000628)	GO BP	1/8	0.0198292	0.10725	58.1429	227.955	SMAD3
Positive Regulation Of Respiratory Burst (GO:0060267)	GO BP	1/8	0.0198292	0.10725	58.1429	227.955	INSR
Positive Regulation Of Adaptive Immune Response (GO:0002821)	GO BP	1/8	0.0198292	0.10725	58.1429	227.955	EIF2AK4
Negative Regulation By Host Of Viral Genome Replication (GO:0044828)	GO BP	1/8	0.0198292	0.10725	58.1429	227.955	EIF2AK4
Regulation Of Cell Killing (GO:0031341)	GO BP	1/8	0.0198292	0.10725	58.1429	227.955	TGFB2
Positive Regulation Of Extracellular Matrix Assembly (GO:1901203)	GO BP	1/8	0.0198292	0.10725	58.1429	227.955	SMAD3
Regulation Of Phosphatidylinositol 3-Kinase Signaling (GO:0014066)	GO BP	2/90	0.0213287	0.10827	9.40436	36.1852	TGFB2;INSR
Phosphorylation (GO:0016310)	GO BP	4/429	0.0221329	0.10827	3.99488	15.2233	TGFB2;CHEK2;INSR;EIF2AK4
Positive Regulation Of Hippo Signaling (GO:0035332)	GO BP	1/9	0.0222806	0.10827	50.8724	193.521	DLG5
Regulation Of Complement-Dependent Cytotoxicity (GO:1903659)	GO BP	1/9	0.0222806	0.10827	50.8724	193.521	TGFB2
Telomere Maintenance Via Recombination (GO:0000722)	GO BP	1/9	0.0222806	0.10827	50.8724	193.521	RAD51
Regulation Of Hair Cycle (GO:0042634)	GO BP	1/9	0.0222806	0.10827	50.8724	193.521	TERT
Regulation Of Histone Methylation (GO:0031060)	GO BP	1/9	0.0222806	0.10827	50.8724	193.521	MTHFR
Homocysteine Metabolic Process (GO:0050667)	GO BP	1/9	0.0222806	0.10827	50.8724	193.521	MTHFR
Negative Regulation Of Vascular Endothelial Growth Factor Signaling Pathway (GO:1900747)	GO BP	1/9	0.0222806	0.10827	50.8724	193.521	NRG1
Positive Regulation Of Tissue Remodeling (GO:0034105)	GO BP	1/9	0.0222806	0.10827	50.8724	193.521	NRG1
Nucleobase-Containing Compound Biosynthetic Process (GO:0034654)	GO BP	1/9	0.0222806	0.10827	50.8724	193.521	TERT
Positive Regulation Of Cardiocyte Differentiation (GO:1905209)	GO BP	1/9	0.0222806	0.10827	50.8724	193.521	TGFB2
Negative Regulation Of Cell Adhesion Mediated By Integrin (GO:0033629)	GO BP	1/9	0.0222806	0.10827	50.8724	193.521	NRG1
Positive Regulation Of Cellular Component Biogenesis (GO:0044089)	GO BP	2/93	0.022675	0.109332	9.09295	34.4304	SMAD3;NRG1
Cellular Response To Transforming Growth Factor Beta Stimulus (GO:0071560)	GO BP	2/96	0.0240556	0.111446	8.80142	32.8063	TGFB2;SMAD3
Regulation Of Coagulation (GO:0050818)	GO BP	1/10	0.0247259	0.111446	45.2177	167.301	NRG1
Thyroid Hormone Generation (GO:0006590)	GO BP	1/10	0.0247259	0.111446	45.2177	167.301	TG
Notch Signaling Involved In Heart Development (GO:0061314)	GO BP	1/10	0.0247259	0.111446	45.2177	167.301	JAG1
Hematopoietic Stem Cell Proliferation (GO:0071425)	GO BP	1/10	0.0247259	0.111446	45.2177	167.301	MECOM
Neuron Projection Maintenance (GO:1990535)	GO BP	1/10	0.0247259	0.111446	45.2177	167.301	INSR
Atrial Septum Morphogenesis (GO:0060413)	GO BP	1/10	0.0247259	0.111446	45.2177	167.301	TGFB2
Regulation Of Respiratory Burst (GO:0060263)	GO BP	1/10	0.0247259	0.111446	45.2177	167.301	INSR
Embryonic Appendage Morphogenesis (GO:0035113)	GO BP	1/10	0.0247259	0.111446	45.2177	167.301	TGFB2
Negative Regulation Of Fibrinolysis (GO:0051918)	GO BP	1/11	0.0271653	0.115196	40.6939	146.735	NRG1
Tetrahydrofolate Metabolic Process (GO:0046653)	GO BP	1/11	0.0271653	0.115196	40.6939	146.735	MTHFR
Histone H2A Ubiquitination (GO:0033522)	GO BP	1/11	0.0271653	0.115196	40.6939	146.735	RAD51
Catecholamine Biosynthetic Process (GO:0042423)	GO BP	1/11	0.0271653	0.115196	40.6939	146.735	TGFB2
Podocyte Differentiation (GO:0072112)	GO BP	1/11	0.0271653	0.115196	40.6939	146.735	JAG1
Regulation Of Cell Activation (GO:0050865)	GO BP	1/11	0.0271653	0.115196	40.6939	146.735	NRG1
Negative Regulation Of Cellular Response To Vascular Endothelial Growth Factor Stimulus (GO:1902548)	GO BP	1/11	0.0271653	0.115196	40.6939	146.735	NRG1
Regulation Of Cell Cycle Checkpoint (GO:1901976)	GO BP	1/11	0.0271653	0.115196	40.6939	146.735	RAD51
Negative Regulation Of Hippo Signaling (GO:0035331)	GO BP	1/12	0.0295988	0.115196	36.9926	130.215	DLG5
DNA Strand Elongation (GO:0022616)	GO BP	1/12	0.0295988	0.115196	36.9926	130.215	TERT
Histone Monoubiquitination (GO:0010390)	GO BP	1/12	0.0295988	0.115196	36.9926	130.215	RAD51
Negative Regulation Of Stem Cell Differentiation (GO:2000737)	GO BP	1/12	0.0295988	0.115196	36.9926	130.215	JAG1
Aspartate Family Amino Acid Metabolic Process (GO:0009066)	GO BP	1/12	0.0295988	0.115196	36.9926	130.215	MTHFR
Primary miRNA Processing (GO:0031053)	GO BP	1/12	0.0295988	0.115196	36.9926	130.215	SMAD3
Cellular Component Maintenance (GO:0043954)	GO BP	1/12	0.0295988	0.115196	36.9926	130.215	INSR
Cellular Response To Leucine Starvation (GO:1990253)	GO BP	1/12	0.0295988	0.115196	36.9926	130.215	EIF2AK4
Mitotic DNA Integrity Checkpoint Signaling (GO:0044774)	GO BP	1/12	0.0295988	0.115196	36.9926	130.215	CHEK2
Negative Regulation By Host Of Viral Process (GO:0044793)	GO BP	1/12	0.0295988	0.115196	36.9926	130.215	EIF2AK4
Endothelium Development (GO:0003158)	GO BP	1/12	0.0295988	0.115196	36.9926	130.215	JAG1
Positive Regulation Of Cysteine-Type Endopeptidase Activity Involved In Apoptotic Process (GO:0043280)	GO BP	2/109	0.0304217	0.115196	7.72702	26.9874	SMAD3;ANP32B
Positive Regulation Of Glycogen Biosynthetic Process (GO:0045725)	GO BP	1/13	0.0320262	0.115196	33.9082	116.685	INSR
ERBB2 Signaling Pathway (GO:0038128)	GO BP	1/13	0.0320262	0.115196	33.9082	116.685	NRG1
Negative Regulation Of Secretion (GO:0051048)	GO BP	1/13	0.0320262	0.115196	33.9082	116.685	NRG1
Regulation Of Macrophage Cytokine Production (GO:0010935)	GO BP	1/13	0.0320262	0.115196	33.9082	116.685	TGFB2
Negative Regulation Of Translational Initiation (GO:0045947)	GO BP	1/13	0.0320262	0.115196	33.9082	116.685	EIF2AK4
Negative Regulation Of Viral Transcription (GO:0032897)	GO BP	1/13	0.0320262	0.115196	33.9082	116.685	TRIM14
Atrial Septum Development (GO:0003283)	GO BP	1/13	0.0320262	0.115196	33.9082	116.685	TGFB2
Atrioventricular Valve Development (GO:0003171)	GO BP	1/13	0.0320262	0.115196	33.9082	116.685	TGFB2
Killing By Host Of Symbiont Cells (GO:0051873)	GO BP	1/13	0.0320262	0.115196	33.9082	116.685	NRG1
Response To Progesterone (GO:0032570)	GO BP	1/13	0.0320262	0.115196	33.9082	116.685	TGFB2
Secondary Palate Development (GO:0062009)	GO BP	1/13	0.0320262	0.115196	33.9082	116.685	TGFB2
Endothelial Cell Differentiation (GO:0045446)	GO BP	1/13	0.0320262	0.115196	33.9082	116.685	JAG1
Positive Regulation Of Cell Population Proliferation (GO:0008284)	GO BP	4/483	0.0323127	0.115196	3.53472	12.1322	TGFB2;TERT;INSR;NRG1
Positive Regulation Of DNA-templated Transcription (GO:0045893)	GO BP	7/1243	0.0339284	0.115196	2.46478	8.33958	TGFB2;SMAD3;JAG1;MECOM;TERT;NFIA;CHEK2
Transmembrane Receptor Protein Tyrosine Kinase Signaling Pathway (GO:0007169)	GO BP	3/284	0.0340256	0.115196	4.46786	15.1042	YES1;INSR;NRG1
Positive Regulation Of Glycogen Metabolic Process (GO:0070875)	GO BP	1/14	0.0344477	0.115196	31.2983	105.422	INSR
Establishment Of Protein Localization To Chromosome (GO:0070199)	GO BP	1/14	0.0344477	0.115196	31.2983	105.422	TERT
Striated Muscle Cell Development (GO:0055002)	GO BP	1/14	0.0344477	0.115196	31.2983	105.422	TMOD1
Regulation Of Endothelial Cell Chemotaxis (GO:2001026)	GO BP	1/14	0.0344477	0.115196	31.2983	105.422	NRG1
Positive Regulation Of Long-Term Synaptic Potentiation (GO:1900273)	GO BP	1/14	0.0344477	0.115196	31.2983	105.422	EIF2AK4
Regulation Of Feeding Behavior (GO:0060259)	GO BP	1/14	0.0344477	0.115196	31.2983	105.422	EIF2AK4
Histone H2A Monoubiquitination (GO:0035518)	GO BP	1/14	0.0344477	0.115196	31.2983	105.422	RAD51
Positive Regulation Of Protein-Containing Complex Disassembly (GO:0043243)	GO BP	1/14	0.0344477	0.115196	31.2983	105.422	INSR
Aorta Development (GO:0035904)	GO BP	1/14	0.0344477	0.115196	31.2983	105.422	JAG1
Cardiac Cell Development (GO:0055006)	GO BP	1/14	0.0344477	0.115196	31.2983	105.422	JAG1
Pathway-Restricted SMAD Protein Phosphorylation (GO:0060389)	GO BP	1/14	0.0344477	0.115196	31.2983	105.422	TGFB2
Mitotic intra-S DNA Damage Checkpoint Signaling (GO:0031573)	GO BP	1/14	0.0344477	0.115196	31.2983	105.422	CHEK2
Mitotic Recombination (GO:0006312)	GO BP	1/14	0.0344477	0.115196	31.2983	105.422	RAD51
Protein Phosphorylation (GO:0006468)	GO BP	4/500	0.0360045	0.116437	3.41059	11.3372	TGFB2;CHEK2;INSR;EIF2AK4
Stem Cell Development (GO:0048864)	GO BP	1/15	0.0368633	0.116437	29.0612	95.9177	NRG1
Positive Regulation Of Muscle Cell Differentiation (GO:0051149)	GO BP	1/15	0.0368633	0.116437	29.0612	95.9177	NRG1
Histone H4-K5 Acetylation (GO:0043981)	GO BP	1/15	0.0368633	0.116437	29.0612	95.9177	JADE2
Histone H4-K8 Acetylation (GO:0043982)	GO BP	1/15	0.0368633	0.116437	29.0612	95.9177	JADE2
Nucleotide-Sugar Biosynthetic Process (GO:0009226)	GO BP	1/15	0.0368633	0.116437	29.0612	95.9177	NANS
Protein Localization To Chromosome, Telomeric Region (GO:0070198)	GO BP	1/15	0.0368633	0.116437	29.0612	95.9177	TERT
Regulation Of Cell Cycle (GO:0051726)	GO BP	3/298	0.0383936	0.116437	4.25279	13.8635	TGFB2;MECOM;JADE2
Enzyme-Linked Receptor Protein Signaling Pathway (GO:0007167)	GO BP	2/124	0.0384971	0.116437	6.77186	22.0571	YES1;INSR
Negative Regulation Of Inflammatory Response To Antigenic Stimulus (GO:0002862)	GO BP	1/16	0.0392729	0.116437	27.1224	87.8013	YES1
Regulation Of Fibrinolysis (GO:0051917)	GO BP	1/16	0.0392729	0.116437	27.1224	87.8013	NRG1
Negative Regulation Of Phosphatase Activity (GO:0010923)	GO BP	1/16	0.0392729	0.116437	27.1224	87.8013	TGFB2
Activin Receptor Signaling Pathway (GO:0032924)	GO BP	1/16	0.0392729	0.116437	27.1224	87.8013	SMAD3
Positive Regulation Of Stem Cell Proliferation (GO:2000648)	GO BP	1/16	0.0392729	0.116437	27.1224	87.8013	TERT
Neuron Projection Organization (GO:0106027)	GO BP	1/16	0.0392729	0.116437	27.1224	87.8013	INSR
Lymphocyte Mediated Immunity (GO:0002449)	GO BP	1/16	0.0392729	0.116437	27.1224	87.8013	JAG1
Maturation Of 5.8S rRNA (GO:0000460)	GO BP	1/16	0.0392729	0.116437	27.1224	87.8013	MPHOSPH6
Cell Surface Receptor Signaling Pathway Involved In Heart Development (GO:0061311)	GO BP	1/16	0.0392729	0.116437	27.1224	87.8013	JAG1
Regulation Of Secretion (GO:0051046)	GO BP	1/16	0.0392729	0.116437	27.1224	87.8013	NRG1
Pharyngeal System Development (GO:0060037)	GO BP	1/16	0.0392729	0.116437	27.1224	87.8013	TGFB2
Regulation Of Stem Cell Proliferation (GO:0072091)	GO BP	1/16	0.0392729	0.116437	27.1224	87.8013	TERT
Negative Regulation Of Cytokine Production Involved In Immune Response (GO:0002719)	GO BP	1/16	0.0392729	0.116437	27.1224	87.8013	TGFB2
Positive Regulation Of Intracellular Protein Transport (GO:0090316)	GO BP	2/126	0.0396296	0.116437	6.66196	21.506	SMAD3;ANP32B
DNA Biosynthetic Process (GO:0071897)	GO BP	1/17	0.0416767	0.116437	25.426	80.7992	TERT
DNA Damage Response, Signal Transduction By P53 Class Mediator Resulting In Cell Cycle Arrest (GO:0006977)	GO BP	1/17	0.0416767	0.116437	25.426	80.7992	CHEK2
Sulfur Amino Acid Metabolic Process (GO:0000096)	GO BP	1/17	0.0416767	0.116437	25.426	80.7992	MTHFR
Transcription By RNA Polymerase I (GO:0006360)	GO BP	1/17	0.0416767	0.116437	25.426	80.7992	POLR1C
Positive Regulation Of Nitric-Oxide Synthase Activity (GO:0051000)	GO BP	1/17	0.0416767	0.116437	25.426	80.7992	TERT
Regulation Of Inflammatory Response To Antigenic Stimulus (GO:0002861)	GO BP	1/17	0.0416767	0.116437	25.426	80.7992	YES1
Positive Regulation Of Stem Cell Differentiation (GO:2000738)	GO BP	1/17	0.0416767	0.116437	25.426	80.7992	TGFB2
Aorta Morphogenesis (GO:0035909)	GO BP	1/17	0.0416767	0.116437	25.426	80.7992	JAG1
Cellular Response To Alkaloid (GO:0071312)	GO BP	1/17	0.0416767	0.116437	25.426	80.7992	RAD51
Regulation Of Viral Transcription (GO:0046782)	GO BP	1/17	0.0416767	0.116437	25.426	80.7992	TRIM14
Positive Regulation Of Cell Adhesion Mediated By Integrin (GO:0033630)	GO BP	1/17	0.0416767	0.116437	25.426	80.7992	TGFB2
Embryo Development Ending In Birth Or Egg Hatching (GO:0009792)	GO BP	1/17	0.0416767	0.116437	25.426	80.7992	TGFB2
Negative Regulation Of Cellular Senescence (GO:2000773)	GO BP	1/17	0.0416767	0.116437	25.426	80.7992	TERT
Positive Regulation Of Intracellular Signal Transduction (GO:1902533)	GO BP	4/525	0.0418641	0.116437	3.24276	10.2903	TGFB2;GPR37;INSR;DLG5
Transmembrane Receptor Protein Serine/Threonine Kinase Signaling Pathway (GO:0007178)	GO BP	2/130	0.0419323	0.116437	6.45247	20.4653	TGFB2;SMAD3
Negative Regulation Of Cell Motility (GO:2000146)	GO BP	2/133	0.0436919	0.116657	6.30375	19.7345	JAG1;DLG5
Positive Regulation Of Glycolytic Process (GO:0045821)	GO BP	1/18	0.0440745	0.116657	23.9292	74.7039	INSR
Regulation Of Histone Modification (GO:0031056)	GO BP	1/18	0.0440745	0.116657	23.9292	74.7039	MTHFR
Positive Regulation Of Stress-Activated Protein Kinase Signaling Cascade (GO:0070304)	GO BP	1/18	0.0440745	0.116657	23.9292	74.7039	TGFB2
Neural Crest Cell Differentiation (GO:0014033)	GO BP	1/18	0.0440745	0.116657	23.9292	74.7039	NRG1
Cardiac Atrium Morphogenesis (GO:0003209)	GO BP	1/18	0.0440745	0.116657	23.9292	74.7039	TGFB2
Mesenchyme Morphogenesis (GO:0072132)	GO BP	1/18	0.0440745	0.116657	23.9292	74.7039	TGFB2
Regulation Of DNA Damage Checkpoint (GO:2000001)	GO BP	1/18	0.0440745	0.116657	23.9292	74.7039	RAD51
Regulation Of Adaptive Immune Response (GO:0002819)	GO BP	1/18	0.0440745	0.116657	23.9292	74.7039	EIF2AK4
Positive Regulation Of Extracellular Matrix Organization (GO:1903055)	GO BP	1/18	0.0440745	0.116657	23.9292	74.7039	SMAD3
Positive Regulation Of Focal Adhesion Assembly (GO:0051894)	GO BP	1/18	0.0440745	0.116657	23.9292	74.7039	NRG1
Non-Membrane-Bounded Organelle Assembly (GO:0140694)	GO BP	2/135	0.0448801	0.117968	6.20833	19.2692	TMOD1;HAUS6
Telomere Maintenance Via Telomerase (GO:0007004)	GO BP	1/19	0.0464665	0.117968	22.5986	69.3558	TERT
RNA-templated DNA Biosynthetic Process (GO:0006278)	GO BP	1/19	0.0464665	0.117968	22.5986	69.3558	TERT
Atrioventricular Valve Morphogenesis (GO:0003181)	GO BP	1/19	0.0464665	0.117968	22.5986	69.3558	TGFB2
Cardiac Epithelial To Mesenchymal Transition (GO:0060317)	GO BP	1/19	0.0464665	0.117968	22.5986	69.3558	TGFB2
Regulation Of Protein-Containing Complex Disassembly (GO:0043244)	GO BP	1/19	0.0464665	0.117968	22.5986	69.3558	INSR
Regulation Of Vascular Endothelial Growth Factor Signaling Pathway (GO:1900746)	GO BP	1/19	0.0464665	0.117968	22.5986	69.3558	NRG1
Regulation Of Behavior (GO:0050795)	GO BP	1/19	0.0464665	0.117968	22.5986	69.3558	EIF2AK4
Dopamine Metabolic Process (GO:0042417)	GO BP	1/19	0.0464665	0.117968	22.5986	69.3558	TGFB2
Embryonic Digestive Tract Development (GO:0048566)	GO BP	1/19	0.0464665	0.117968	22.5986	69.3558	TGFB2
Striated Muscle Cell Differentiation (GO:0051146)	GO BP	1/20	0.0488525	0.119631	21.4082	64.6301	NRG1
DNA Unwinding Involved In DNA Replication (GO:0006268)	GO BP	1/20	0.0488525	0.119631	21.4082	64.6301	RAD51
Fc-gamma Receptor Signaling Pathway Involved In Phagocytosis (GO:0038096)	GO BP	1/20	0.0488525	0.119631	21.4082	64.6301	YES1
T Cell Mediated Immunity (GO:0002456)	GO BP	1/20	0.0488525	0.119631	21.4082	64.6301	JAG1
Negative Regulation Of Small GTPase Mediated Signal Transduction (GO:0051058)	GO BP	1/20	0.0488525	0.119631	21.4082	64.6301	TGFB2
Limb Morphogenesis (GO:0035108)	GO BP	1/20	0.0488525	0.119631	21.4082	64.6301	TGFB2
Nuclear-Transcribed mRNA poly(A) Tail Shortening (GO:0000289)	GO BP	1/20	0.0488525	0.119631	21.4082	64.6301	SAMD4A
Long-Term Memory (GO:0007616)	GO BP	1/20	0.0488525	0.119631	21.4082	64.6301	EIF2AK4
Response To Ketone (GO:1901654)	GO BP	1/20	0.0488525	0.119631	21.4082	64.6301	TGFB2
Positive Regulation Of Protein Kinase Activity (GO:0045860)	GO BP	2/145	0.050998	0.121629	5.77127	17.1751	TGFB2;INSR
Positive Regulation Of Heart Contraction (GO:0045823)	GO BP	1/21	0.0512328	0.121629	20.3367	60.4281	TGFB2
Regulation Of Dendritic Spine Development (GO:0060998)	GO BP	1/21	0.0512328	0.121629	20.3367	60.4281	DLG5
Positive Regulation Of Smoothened Signaling Pathway (GO:0045880)	GO BP	1/21	0.0512328	0.121629	20.3367	60.4281	DLG5
Modulation By Host Of Viral Genome Replication (GO:0044827)	GO BP	1/21	0.0512328	0.121629	20.3367	60.4281	EIF2AK4
Positive Regulation Of Blood Coagulation (GO:0030194)	GO BP	1/21	0.0512328	0.121629	20.3367	60.4281	NRG1
Positive Regulation Of Dendritic Spine Development (GO:0060999)	GO BP	1/21	0.0512328	0.121629	20.3367	60.4281	DLG5
Endocardial Cushion Morphogenesis (GO:0003203)	GO BP	1/21	0.0512328	0.121629	20.3367	60.4281	TGFB2
Negative Regulation Of Gene Expression (GO:0010629)	GO BP	3/336	0.0516198	0.122082	3.76021	11.1447	TGFB2;SMAD3;TERT
Negative Regulation Of Extrinsic Apoptotic Signaling Pathway In Absence Of Ligand (GO:2001240)	GO BP	1/22	0.0536072	0.123495	19.3673	56.6702	TERT
Fc Receptor Mediated Stimulatory Signaling Pathway (GO:0002431)	GO BP	1/22	0.0536072	0.123495	19.3673	56.6702	YES1
Negative Regulation Of Signal Transduction In Absence Of Ligand (GO:1901099)	GO BP	1/22	0.0536072	0.123495	19.3673	56.6702	TERT
Positive Regulation Of Receptor Internalization (GO:0002092)	GO BP	1/22	0.0536072	0.123495	19.3673	56.6702	INSR
Mammary Gland Development (GO:0030879)	GO BP	1/22	0.0536072	0.123495	19.3673	56.6702	NRG1
Positive Regulation Of Cilium Assembly (GO:0045724)	GO BP	1/22	0.0536072	0.123495	19.3673	56.6702	SAXO1
Regulation Of Catabolic Process (GO:0009894)	GO BP	1/22	0.0536072	0.123495	19.3673	56.6702	CHEK2
Regulation Of Cellular Response To Transforming Growth Factor Beta Stimulus (GO:1903844)	GO BP	1/23	0.0559758	0.124613	18.4861	53.2924	SMAD3
Negative Regulation Of Neuron Differentiation (GO:0045665)	GO BP	1/23	0.0559758	0.124613	18.4861	53.2924	EIF2AK4
Negative Regulation Of Oxidative Stress-Induced Cell Death (GO:1903202)	GO BP	1/23	0.0559758	0.124613	18.4861	53.2924	GPR37
Positive Regulation Of Neuron Apoptotic Process (GO:0043525)	GO BP	1/23	0.0559758	0.124613	18.4861	53.2924	TGFB2
Adaptive Immune Response Based On Somatic Recombination Of Immune Receptors Built From Immunoglobulin Superfamily Domains (GO:0002460)	GO BP	1/23	0.0559758	0.124613	18.4861	53.2924	JAG1
Lymphocyte Activation Involved In Immune Response (GO:0002285)	GO BP	1/23	0.0559758	0.124613	18.4861	53.2924	EIF2AK4
Positive Regulation Of Cell-Substrate Junction Organization (GO:0150117)	GO BP	1/23	0.0559758	0.124613	18.4861	53.2924	NRG1
Endocardial Cushion Development (GO:0003197)	GO BP	1/23	0.0559758	0.124613	18.4861	53.2924	TGFB2
Endocrine System Development (GO:0035270)	GO BP	1/23	0.0559758	0.124613	18.4861	53.2924	TG
Regulation Of Cellular Component Organization (GO:0051128)	GO BP	2/153	0.056096	0.124613	5.4633	15.7381	NRG1;JADE2
Fc-gamma Receptor Signaling Pathway (GO:0038094)	GO BP	1/24	0.0583386	0.128221	17.6815	50.2417	YES1
Gliogenesis (GO:0042063)	GO BP	1/24	0.0583386	0.128221	17.6815	50.2417	TGFB2
Outflow Tract Septum Morphogenesis (GO:0003148)	GO BP	1/24	0.0583386	0.128221	17.6815	50.2417	TGFB2
Positive Regulation Of Glucose Import (GO:0046326)	GO BP	1/25	0.0606955	0.131085	16.9439	47.4748	INSR
Regulation Of Glycogen Biosynthetic Process (GO:0005979)	GO BP	1/25	0.0606955	0.131085	16.9439	47.4748	INSR
Regulation Of Hippo Signaling (GO:0035330)	GO BP	1/25	0.0606955	0.131085	16.9439	47.4748	DLG5
Positive Regulation Of Striated Muscle Cell Differentiation (GO:0051155)	GO BP	1/25	0.0606955	0.131085	16.9439	47.4748	NRG1
Proteoglycan Metabolic Process (GO:0006029)	GO BP	1/25	0.0606955	0.131085	16.9439	47.4748	CHST14
Negative Regulation Of Cell Migration (GO:0030336)	GO BP	2/163	0.0627089	0.133385	5.12138	14.1824	JAG1;DLG5
Establishment Or Maintenance Of Apical/Basal Cell Polarity (GO:0035088)	GO BP	1/26	0.0630467	0.133385	16.2653	44.9553	DLG5
Positive Regulation Of Monooxygenase Activity (GO:0032770)	GO BP	1/26	0.0630467	0.133385	16.2653	44.9553	TERT
Positive Regulation Of Nuclear Division (GO:0051785)	GO BP	1/26	0.0630467	0.133385	16.2653	44.9553	INSR
Mitotic G1 DNA Damage Checkpoint Signaling (GO:0031571)	GO BP	1/26	0.0630467	0.133385	16.2653	44.9553	CHEK2
Dendritic Spine Organization (GO:0097061)	GO BP	1/26	0.0630467	0.133385	16.2653	44.9553	INSR
Positive Regulation Of Immune System Process (GO:0002684)	GO BP	1/27	0.0653922	0.136033	15.6389	42.6529	TGFB2
Regulation Of Extrinsic Apoptotic Signaling Pathway In Absence Of Ligand (GO:2001239)	GO BP	1/27	0.0653922	0.136033	15.6389	42.6529	TERT
T Cell Activation Involved In Immune Response (GO:0002286)	GO BP	1/27	0.0653922	0.136033	15.6389	42.6529	EIF2AK4
Ventricular Septum Morphogenesis (GO:0060412)	GO BP	1/27	0.0653922	0.136033	15.6389	42.6529	TGFB2
Cardiac Muscle Cell Differentiation (GO:0055007)	GO BP	1/27	0.0653922	0.136033	15.6389	42.6529	NRG1
Double-Strand Break Repair (GO:0006302)	GO BP	2/168	0.0661107	0.137069	4.96586	13.4894	RAD51;CHEK2
Positive Regulation Of Protein Import Into Nucleus (GO:0042307)	GO BP	1/28	0.0677318	0.138583	15.059	40.5417	SMAD3
Regulation Of Nitric-Oxide Synthase Activity (GO:0050999)	GO BP	1/28	0.0677318	0.138583	15.059	40.5417	TERT
Regulation Of Platelet Activation (GO:0010543)	GO BP	1/28	0.0677318	0.138583	15.059	40.5417	NRG1
Positive Regulation Of Defense Response To Virus By Host (GO:0002230)	GO BP	1/28	0.0677318	0.138583	15.059	40.5417	EIF2AK4
Heart Development (GO:0007507)	GO BP	2/171	0.0681811	0.139045	4.87697	13.0975	TGFB2;INSR
Generation Of Neurons (GO:0048699)	GO BP	2/172	0.068876	0.139236	4.84804	12.9707	TGFB2;SDCCAG8
Regulation Of Developmental Growth (GO:0048638)	GO BP	1/29	0.0700658	0.139236	14.5204	38.5999	INSR
Negative Regulation Of Plasma Membrane Bounded Cell Projection Assembly (GO:0120033)	GO BP	1/29	0.0700658	0.139236	14.5204	38.5999	NRG1
Alpha-Amino Acid Metabolic Process (GO:1901605)	GO BP	1/29	0.0700658	0.139236	14.5204	38.5999	MTHFR
Integrated Stress Response Signaling (GO:0140467)	GO BP	1/29	0.0700658	0.139236	14.5204	38.5999	EIF2AK4
Defense Response To Fungus (GO:0050832)	GO BP	1/29	0.0700658	0.139236	14.5204	38.5999	NRG1
Response To Steroid Hormone (GO:0048545)	GO BP	1/29	0.0700658	0.139236	14.5204	38.5999	TGFB2
Regulation Of Blood Coagulation (GO:0030193)	GO BP	1/29	0.0700658	0.139236	14.5204	38.5999	NRG1
Positive Regulation Of Multicellular Organismal Process (GO:0051240)	GO BP	3/387	0.0723815	0.14338	3.25233	8.53998	TGFB2;SMAD3;TERT
Positive Regulation Of Glucose Transmembrane Transport (GO:0010828)	GO BP	1/31	0.0747165	0.145685	13.551	35.1521	INSR
Regulation Of Long-Term Synaptic Potentiation (GO:1900271)	GO BP	1/31	0.0747165	0.145685	13.551	35.1521	EIF2AK4
Regulation Of Transmembrane Receptor Protein Serine/Threonine Kinase Signaling Pathway (GO:0090092)	GO BP	1/31	0.0747165	0.145685	13.551	35.1521	SMAD3
Negative Regulation Of Cell-Matrix Adhesion (GO:0001953)	GO BP	1/31	0.0747165	0.145685	13.551	35.1521	JAG1
Negative Regulation Of Chemotaxis (GO:0050922)	GO BP	1/31	0.0747165	0.145685	13.551	35.1521	NRG1
Negative Regulation Of Fat Cell Differentiation (GO:0045599)	GO BP	1/32	0.0770333	0.148803	13.1132	33.616	SMAD3
Positive Regulation Of Synapse Assembly (GO:0051965)	GO BP	1/32	0.0770333	0.148803	13.1132	33.616	DLG5
miRNA Processing (GO:0035196)	GO BP	1/32	0.0770333	0.148803	13.1132	33.616	SMAD3
Regulation Of Lamellipodium Assembly (GO:0010591)	GO BP	1/33	0.0793444	0.151853	12.7028	32.1884	NRG1
Positive Regulation Of Small Molecule Metabolic Process (GO:0062013)	GO BP	1/33	0.0793444	0.151853	12.7028	32.1884	INSR
Negative Regulation Of Blood Vessel Endothelial Cell Migration (GO:0043537)	GO BP	1/33	0.0793444	0.151853	12.7028	32.1884	NRG1
DNA Damage Checkpoint Signaling (GO:0000077)	GO BP	1/34	0.0816498	0.15297	12.3173	30.8586	CHEK2
Positive Regulation Of Neuron Death (GO:1901216)	GO BP	1/34	0.0816498	0.15297	12.3173	30.8586	TGFB2
Regulation Of DNA Biosynthetic Process (GO:2000278)	GO BP	1/34	0.0816498	0.15297	12.3173	30.8586	JADE2
Negative Regulation Of JNK Cascade (GO:0046329)	GO BP	1/34	0.0816498	0.15297	12.3173	30.8586	MECOM
Positive Regulation Of Carbohydrate Metabolic Process (GO:0045913)	GO BP	1/34	0.0816498	0.15297	12.3173	30.8586	INSR
Negative Regulation Of Ras Protein Signal Transduction (GO:0046580)	GO BP	1/34	0.0816498	0.15297	12.3173	30.8586	TGFB2
Embryonic Limb Morphogenesis (GO:0030326)	GO BP	1/34	0.0816498	0.15297	12.3173	30.8586	TGFB2
Regulation Of Cellular Senescence (GO:2000772)	GO BP	1/35	0.0839496	0.155489	11.9544	29.6174	TERT
Positive Regulation Of Mitotic Nuclear Division (GO:0045840)	GO BP	1/35	0.0839496	0.155489	11.9544	29.6174	INSR
Regulatory ncRNA Processing (GO:0070918)	GO BP	1/35	0.0839496	0.155489	11.9544	29.6174	TERT
Regulation Of Cell Differentiation (GO:0045595)	GO BP	2/193	0.0839939	0.155489	4.31043	10.677	HEMGN;ANP32B
Regulation Of Programmed Cell Death (GO:0043067)	GO BP	2/195	0.0854832	0.156395	4.26533	10.4903	MECOM;ANP32B
DNA Damage Response, Signal Transduction By P53 Class Mediator (GO:0030330)	GO BP	1/36	0.0862437	0.156395	11.6122	28.4567	CHEK2
tRNA Methylation (GO:0030488)	GO BP	1/36	0.0862437	0.156395	11.6122	28.4567	TRMO
Regulation Of Glucose Import (GO:0046324)	GO BP	1/36	0.0862437	0.156395	11.6122	28.4567	INSR
Interstrand Cross-Link Repair (GO:0036297)	GO BP	1/36	0.0862437	0.156395	11.6122	28.4567	RAD51
Regulation Of Receptor Internalization (GO:0002090)	GO BP	1/36	0.0862437	0.156395	11.6122	28.4567	INSR
Negative Regulation Of T Cell Proliferation (GO:0042130)	GO BP	1/36	0.0862437	0.156395	11.6122	28.4567	DLG5
Negative Regulation Of Endothelial Cell Migration (GO:0010596)	GO BP	1/37	0.0885322	0.157785	11.2891	27.3692	NRG1
Regulation Of Defense Response To Virus By Host (GO:0050691)	GO BP	1/37	0.0885322	0.157785	11.2891	27.3692	EIF2AK4
Ventricular Septum Development (GO:0003281)	GO BP	1/37	0.0885322	0.157785	11.2891	27.3692	TGFB2
Negative Regulation Of Stress-Activated MAPK Cascade (GO:0032873)	GO BP	1/37	0.0885322	0.157785	11.2891	27.3692	MECOM
Aortic Valve Morphogenesis (GO:0003180)	GO BP	1/37	0.0885322	0.157785	11.2891	27.3692	JAG1
Regulation Of Cellular Component Biogenesis (GO:0044087)	GO BP	1/37	0.0885322	0.157785	11.2891	27.3692	NRG1
Regulation Of Translation (GO:0006417)	GO BP	2/202	0.0907586	0.159453	4.11458	9.87316	SAMD4A;EIF2AK4
G2/M Transition Of Mitotic Cell Cycle (GO:0000086)	GO BP	1/38	0.0908151	0.159453	10.9835	26.3485	CHEK2
Regulation Of Protein Import Into Nucleus (GO:0042306)	GO BP	1/38	0.0908151	0.159453	10.9835	26.3485	SMAD3
Response To Transforming Growth Factor Beta (GO:0071559)	GO BP	1/38	0.0908151	0.159453	10.9835	26.3485	SMAD3
Regulation Of MAPK Cascade (GO:0043408)	GO BP	2/204	0.0922834	0.159453	4.07343	9.70655	GPR37;INSR
Regulation Of Angiogenesis (GO:0045765)	GO BP	2/205	0.0930487	0.159453	4.05316	9.62477	TGFB2;NRG1
Negative Regulation Of Lymphocyte Proliferation (GO:0050672)	GO BP	1/39	0.0930924	0.159453	10.6939	25.389	DLG5
Histone H4 Acetylation (GO:0043967)	GO BP	1/39	0.0930924	0.159453	10.6939	25.389	JADE2
Negative Regulation Of Transport (GO:0051051)	GO BP	1/39	0.0930924	0.159453	10.6939	25.389	NRG1
Neuron Projection Extension (GO:1990138)	GO BP	1/39	0.0930924	0.159453	10.6939	25.389	EIF2AK4
Nuclear-Transcribed mRNA Catabolic Process, Deadenylation-Dependent Decay (GO:0000288)	GO BP	1/39	0.0930924	0.159453	10.6939	25.389	SAMD4A
Odontogenesis (GO:0042476)	GO BP	1/39	0.0930924	0.159453	10.6939	25.389	TGFB2
Digestive Tract Development (GO:0048565)	GO BP	1/39	0.0930924	0.159453	10.6939	25.389	TGFB2
Negative Regulation Of Cell-Substrate Adhesion (GO:0010812)	GO BP	1/39	0.0930924	0.159453	10.6939	25.389	JAG1
Regulation Of Cell Migration (GO:0030334)	GO BP	3/434	0.0943328	0.159453	2.8907	6.82474	JAG1;INSR;DLG5
Protein Stabilization (GO:0050821)	GO BP	2/208	0.0953557	0.159453	3.99353	9.38535	CHEK2;SAXO1
Establishment Or Maintenance Of Epithelial Cell Apical/Basal Polarity (GO:0045197)	GO BP	1/40	0.0953641	0.159453	10.4192	24.4856	DLG5
Notch Signaling Pathway (GO:0007219)	GO BP	1/40	0.0953641	0.159453	10.4192	24.4856	JAG1
Regulation Of Glycolytic Process (GO:0006110)	GO BP	1/40	0.0953641	0.159453	10.4192	24.4856	INSR
Aortic Valve Development (GO:0003176)	GO BP	1/40	0.0953641	0.159453	10.4192	24.4856	JAG1
Nucleic Acid-Templated Transcription (GO:0097659)	GO BP	1/40	0.0953641	0.159453	10.4192	24.4856	TERT
Cell Cycle G2/M Phase Transition (GO:0044839)	GO BP	1/40	0.0953641	0.159453	10.4192	24.4856	CHEK2
Negative Regulation Of Cell-Cell Adhesion (GO:0022408)	GO BP	1/40	0.0953641	0.159453	10.4192	24.4856	JAG1
Stem Cell Differentiation (GO:0048863)	GO BP	1/41	0.0976302	0.161505	10.1582	23.6337	TGFB2
DNA Duplex Unwinding (GO:0032508)	GO BP	1/41	0.0976302	0.161505	10.1582	23.6337	RAD51
Visual System Development (GO:0150063)	GO BP	1/41	0.0976302	0.161505	10.1582	23.6337	TGFB2
Response To Amino Acid Starvation (GO:1990928)	GO BP	1/41	0.0976302	0.161505	10.1582	23.6337	EIF2AK4
DNA Integrity Checkpoint Signaling (GO:0031570)	GO BP	1/42	0.0998908	0.163076	9.90991	22.8292	CHEK2
DNA Recombination (GO:0006310)	GO BP	1/42	0.0998908	0.163076	9.90991	22.8292	RAD51
Keratinocyte Differentiation (GO:0030216)	GO BP	1/42	0.0998908	0.163076	9.90991	22.8292	JAG1
Cellular Response To Amino Acid Starvation (GO:0034198)	GO BP	1/42	0.0998908	0.163076	9.90991	22.8292	EIF2AK4
Collagen Fibril Organization (GO:0030199)	GO BP	1/42	0.0998908	0.163076	9.90991	22.8292	TGFB2
DNA-templated DNA Replication Maintenance Of Fidelity (GO:0045005)	GO BP	1/43	0.102146	0.164598	9.67347	22.0686	RAD51
Positive Regulation Of Receptor-Mediated Endocytosis (GO:0048260)	GO BP	1/43	0.102146	0.164598	9.67347	22.0686	INSR
Positive Regulation Of Cell-Matrix Adhesion (GO:0001954)	GO BP	1/43	0.102146	0.164598	9.67347	22.0686	NRG1
Regulation Of Cell-Cell Adhesion (GO:0022407)	GO BP	1/43	0.102146	0.164598	9.67347	22.0686	JAG1
Ephrin Receptor Signaling Pathway (GO:0048013)	GO BP	1/43	0.102146	0.164598	9.67347	22.0686	YES1
Regulation Of DNA-templated Transcription (GO:0006355)	GO BP	8/1922	0.102744	0.165133	1.79489	4.08431	SMAD3;MECOM;NFIA;CHEK2;INSR;NRG1;JADE2;ZNF257
Positive Regulation Of Nucleocytoplasmic Transport (GO:0046824)	GO BP	1/44	0.104395	0.166071	9.44803	21.3485	SMAD3
Neural Crest Cell Development (GO:0014032)	GO BP	1/44	0.104395	0.166071	9.44803	21.3485	NRG1
Mitotic Spindle Assembly (GO:0090307)	GO BP	1/44	0.104395	0.166071	9.44803	21.3485	CHEK2
Regulation Of DNA Recombination (GO:0000018)	GO BP	1/44	0.104395	0.166071	9.44803	21.3485	RAD51
Regulation Of Stem Cell Differentiation (GO:2000736)	GO BP	1/45	0.106639	0.169208	9.23284	20.6659	JAG1
Male Gonad Development (GO:0008584)	GO BP	1/46	0.108878	0.170584	9.02721	20.0181	TGFB2
Replication Fork Processing (GO:0031297)	GO BP	1/46	0.108878	0.170584	9.02721	20.0181	RAD51
Myofibril Assembly (GO:0030239)	GO BP	1/46	0.108878	0.170584	9.02721	20.0181	TMOD1
Development Of Primary Male Sexual Characteristics (GO:0046546)	GO BP	1/46	0.108878	0.170584	9.02721	20.0181	TGFB2
Negative Regulation Of Cellular Metabolic Process (GO:0031324)	GO BP	1/46	0.108878	0.170584	9.02721	20.0181	TERT
Insulin Receptor Signaling Pathway (GO:0008286)	GO BP	1/47	0.111111	0.172397	8.83052	19.4027	INSR
Regulation Of Signal Transduction By P53 Class Mediator (GO:1901796)	GO BP	1/47	0.111111	0.172397	8.83052	19.4027	CHEK2
Regulation Of Wound Healing (GO:0061041)	GO BP	1/47	0.111111	0.172397	8.83052	19.4027	NRG1
Chromatin Remodeling (GO:0006338)	GO BP	2/228	0.111143	0.172397	3.63643	7.989	MECOM;MTHFR
Cellular Response To Radiation (GO:0071478)	GO BP	1/48	0.113338	0.175364	8.64221	18.8174	RAD51
Positive Regulation Of Developmental Process (GO:0051094)	GO BP	2/233	0.115193	0.176172	3.55682	7.6868	INSR;DLG5
Positive Regulation Of Nervous System Development (GO:0051962)	GO BP	1/49	0.11556	0.176172	8.46173	18.2601	DLG5
Positive Regulation Of Pathway-Restricted SMAD Protein Phosphorylation (GO:0010862)	GO BP	1/49	0.11556	0.176172	8.46173	18.2601	TGFB2
Neurogenesis (GO:0022008)	GO BP	1/49	0.11556	0.176172	8.46173	18.2601	TGFB2
Intrinsic Apoptotic Signaling Pathway In Response To DNA Damage (GO:0008630)	GO BP	1/49	0.11556	0.176172	8.46173	18.2601	CHEK2
Negative Regulation Of T Cell Activation (GO:0050868)	GO BP	1/49	0.11556	0.176172	8.46173	18.2601	DLG5
Regulation Of Epithelial Cell Migration (GO:0010632)	GO BP	1/50	0.117777	0.178676	8.28863	17.7291	TGFB2
Positive Regulation Of Developmental Growth (GO:0048639)	GO BP	1/50	0.117777	0.178676	8.28863	17.7291	INSR
Regulation Of Smoothened Signaling Pathway (GO:0008589)	GO BP	1/51	0.119988	0.180708	8.12245	17.2226	DLG5
Regulation Of Stress-Activated MAPK Cascade (GO:0032872)	GO BP	1/51	0.119988	0.180708	8.12245	17.2226	TGFB2
Regulation Of Synapse Assembly (GO:0051963)	GO BP	1/51	0.119988	0.180708	8.12245	17.2226	DLG5
Adenylate Cyclase-Inhibiting G Protein-Coupled Receptor Signaling Pathway (GO:0007193)	GO BP	1/52	0.122193	0.182702	7.96279	16.739	GPR37
Cardiac Muscle Tissue Development (GO:0048738)	GO BP	1/52	0.122193	0.182702	7.96279	16.739	NRG1
Cellular Response To Ionizing Radiation (GO:0071479)	GO BP	1/52	0.122193	0.182702	7.96279	16.739	RAD51
Gonad Development (GO:0008406)	GO BP	1/53	0.124393	0.184661	7.80926	16.2769	TGFB2
Regulation Of Macromolecule Biosynthetic Process (GO:0010556)	GO BP	1/53	0.124393	0.184661	7.80926	16.2769	JADE2
Cellular Response To Alcohol (GO:0097306)	GO BP	1/53	0.124393	0.184661	7.80926	16.2769	RAD51
Positive Regulation Of DNA-binding Transcription Factor Activity (GO:0051091)	GO BP	2/246	0.125897	0.185266	3.3651	6.97345	SMAD3;TRIM14
Epidermal Cell Differentiation (GO:0009913)	GO BP	1/54	0.126588	0.185266	7.66153	15.835	JAG1
ERBB Signaling Pathway (GO:0038127)	GO BP	1/54	0.126588	0.185266	7.66153	15.835	NRG1
Regulation Of Focal Adhesion Assembly (GO:0051893)	GO BP	1/54	0.126588	0.185266	7.66153	15.835	NRG1
Peptidyl-Tyrosine Modification (GO:0018212)	GO BP	1/54	0.126588	0.185266	7.66153	15.835	INSR
Regulation Of Blood Vessel Endothelial Cell Migration (GO:0043535)	GO BP	1/54	0.126588	0.185266	7.66153	15.835	NRG1
Neuron Migration (GO:0001764)	GO BP	1/55	0.128778	0.188028	7.51927	15.412	SDCCAG8
Regulation Of Mitotic Nuclear Division (GO:0007088)	GO BP	1/56	0.130962	0.190323	7.38219	15.0069	INSR
Mitotic DNA Damage Checkpoint Signaling (GO:0044773)	GO BP	1/56	0.130962	0.190323	7.38219	15.0069	CHEK2
Signal Transduction In Response To DNA Damage (GO:0042770)	GO BP	1/57	0.133141	0.193038	7.25	14.6185	CHEK2
Eye Development (GO:0001654)	GO BP	1/58	0.135314	0.194827	7.12245	14.246	TGFB2
Glycosaminoglycan Biosynthetic Process (GO:0006024)	GO BP	1/58	0.135314	0.194827	7.12245	14.246	CHST14
Renal System Development (GO:0072001)	GO BP	1/58	0.135314	0.194827	7.12245	14.246	TGFB2
Positive Regulation Of Protein Binding (GO:0032092)	GO BP	1/59	0.137482	0.196583	6.9993	13.8884	TERT
Regulation Of Multicellular Organismal Development (GO:2000026)	GO BP	1/59	0.137482	0.196583	6.9993	13.8884	INSR
protein-DNA Complex Assembly (GO:0065004)	GO BP	1/59	0.137482	0.196583	6.9993	13.8884	RAD51
Negative Regulation Of Peptidase Activity (GO:0010466)	GO BP	1/60	0.139645	0.199218	6.88032	13.545	NRG1
BMP Signaling Pathway (GO:0030509)	GO BP	1/61	0.141802	0.200211	6.76531	13.2148	TGFB2
Positive Regulation Of Organelle Assembly (GO:1902117)	GO BP	1/61	0.141802	0.200211	6.76531	13.2148	SAXO1
Negative Regulation Of Viral Process (GO:0048525)	GO BP	1/61	0.141802	0.200211	6.76531	13.2148	TRIM14
Regulation Of Pathway-Restricted SMAD Protein Phosphorylation (GO:0060393)	GO BP	1/61	0.141802	0.200211	6.76531	13.2148	TGFB2
Regulation Of Protein Phosphorylation (GO:0001932)	GO BP	2/265	0.14195	0.200211	3.11898	6.08912	INSR;NRG1
Regulation Of Embryonic Development (GO:0045995)	GO BP	1/62	0.143954	0.20212	6.65406	12.8973	INSR
RNA Methylation (GO:0001510)	GO BP	1/62	0.143954	0.20212	6.65406	12.8973	TRMO
Telomere Organization (GO:0032200)	GO BP	1/63	0.146101	0.204417	6.54641	12.5918	TERT
Positive Regulation Of Apoptotic Process (GO:0043065)	GO BP	2/270	0.146247	0.204417	3.06001	5.88275	TGFB2;NRG1
Positive Regulation Of Cell Migration (GO:0030335)	GO BP	2/272	0.147973	0.206279	3.03704	5.80294	TGFB2;INSR
Negative Regulation Of Cell Death (GO:0060548)	GO BP	1/64	0.148242	0.206279	6.44218	12.2975	MECOM
Antimicrobial Humoral Immune Response Mediated By Antimicrobial Peptide (GO:0061844)	GO BP	1/65	0.150378	0.20648	6.3412	12.014	NRG1
Cellular Response To Light Stimulus (GO:0071482)	GO BP	1/65	0.150378	0.20648	6.3412	12.014	EIF2AK4
Regulation Of Translational Initiation (GO:0006446)	GO BP	1/65	0.150378	0.20648	6.3412	12.014	EIF2AK4
Monocarboxylic Acid Biosynthetic Process (GO:0072330)	GO BP	1/65	0.150378	0.20648	6.3412	12.014	CHST14
Positive Regulation Of Cell Cycle (GO:0045787)	GO BP	1/65	0.150378	0.20648	6.3412	12.014	TGFB2
Regulation Of Cell-Matrix Adhesion (GO:0001952)	GO BP	1/65	0.150378	0.20648	6.3412	12.014	JAG1
Negative Regulation Of Endopeptidase Activity (GO:0010951)	GO BP	1/66	0.152509	0.208028	6.24333	11.7408	NRG1
Negative Regulation Of Immune Response (GO:0050777)	GO BP	1/66	0.152509	0.208028	6.24333	11.7408	YES1
Cellular Response To BMP Stimulus (GO:0071773)	GO BP	1/66	0.152509	0.208028	6.24333	11.7408	TGFB2
tRNA Modification (GO:0006400)	GO BP	1/67	0.154635	0.210007	6.14842	11.4772	TRMO
Peptidyl-Tyrosine Phosphorylation (GO:0018108)	GO BP	1/67	0.154635	0.210007	6.14842	11.4772	INSR
Neuropeptide Signaling Pathway (GO:0007218)	GO BP	1/68	0.156756	0.211961	6.05635	11.2228	GPR37
Skin Development (GO:0043588)	GO BP	1/68	0.156756	0.211961	6.05635	11.2228	JAG1
Positive Regulation Of Cell Differentiation (GO:0045597)	GO BP	2/283	0.157543	0.21214	2.91652	5.38989	TGFB2;SMAD3
DNA-templated DNA Replication (GO:0006261)	GO BP	1/69	0.158871	0.21214	5.96699	10.9772	RAD51
Regulation Of Endopeptidase Activity (GO:0052548)	GO BP	1/69	0.158871	0.21214	5.96699	10.9772	NRG1
Regulation Of Heart Contraction (GO:0008016)	GO BP	1/69	0.158871	0.21214	5.96699	10.9772	TGFB2
Negative Regulation Of Epithelial Cell Proliferation (GO:0050680)	GO BP	1/70	0.160981	0.21214	5.88021	10.74	TGFB2
Negative Regulation Of Extrinsic Apoptotic Signaling Pathway (GO:2001237)	GO BP	1/70	0.160981	0.21214	5.88021	10.74	TERT
Sulfur Compound Biosynthetic Process (GO:0044272)	GO BP	1/70	0.160981	0.21214	5.88021	10.74	CHST14
Positive Regulation Of Protein Transport (GO:0051222)	GO BP	1/70	0.160981	0.21214	5.88021	10.74	TGFB2
Neutrophil Chemotaxis (GO:0030593)	GO BP	1/70	0.160981	0.21214	5.88021	10.74	TGFB2
Regulation Of Actin Filament-Based Process (GO:0032970)	GO BP	1/70	0.160981	0.21214	5.88021	10.74	NRG1
Sensory Organ Development (GO:0007423)	GO BP	1/70	0.160981	0.21214	5.88021	10.74	TGFB2
Regulation Of Cellular Biosynthetic Process (GO:0031326)	GO BP	1/70	0.160981	0.21214	5.88021	10.74	JADE2
DNA Metabolic Process (GO:0006259)	GO BP	2/288	0.161933	0.212661	2.8648	5.21558	RAD51;TERT
Positive Regulation Of Nucleic Acid-Templated Transcription (GO:1903508)	GO BP	3/557	0.162397	0.212661	2.23473	4.0621	SMAD3;MECOM;CHEK2
Regulation Of Double-Strand Break Repair Via Homologous Recombination (GO:0010569)	GO BP	1/71	0.163086	0.212661	5.79592	10.5108	RAD51
Kidney Development (GO:0001822)	GO BP	1/71	0.163086	0.212661	5.79592	10.5108	TGFB2
Protein Autoubiquitination (GO:0051865)	GO BP	1/71	0.163086	0.212661	5.79592	10.5108	RAD51
DNA Repair (GO:0006281)	GO BP	2/291	0.164578	0.214053	2.83463	5.11473	RAD51;CHEK2
Cellular Response To Hypoxia (GO:0071456)	GO BP	1/72	0.165186	0.214053	5.714	10.2891	TERT
Response To Ionizing Radiation (GO:0010212)	GO BP	1/72	0.165186	0.214053	5.714	10.2891	RAD51
Granulocyte Chemotaxis (GO:0071621)	GO BP	1/73	0.16728	0.215421	5.63435	10.0747	TGFB2
Positive Regulation Of Secretion By Cell (GO:1903532)	GO BP	1/73	0.16728	0.215421	5.63435	10.0747	TGFB2
Cellular Response To Decreased Oxygen Levels (GO:0036294)	GO BP	1/73	0.16728	0.215421	5.63435	10.0747	TERT
Regulation Of Fat Cell Differentiation (GO:0045598)	GO BP	1/75	0.171454	0.219433	5.48152	9.66634	SMAD3
Regulation Of Plasma Membrane Bounded Cell Projection Assembly (GO:0120032)	GO BP	1/75	0.171454	0.219433	5.48152	9.66634	SDCCAG8
Regulation Of DNA Replication (GO:0006275)	GO BP	1/75	0.171454	0.219433	5.48152	9.66634	JADE2
Positive Regulation Of Protein Secretion (GO:0050714)	GO BP	1/76	0.173533	0.221109	5.40816	9.47179	TGFB2
Regulation Of Ras Protein Signal Transduction (GO:0046578)	GO BP	1/76	0.173533	0.221109	5.40816	9.47179	TGFB2
Regulation Of Immune Response (GO:0050776)	GO BP	1/77	0.175607	0.221109	5.33673	9.28328	TGFB2
Positive Regulation Of Response To Stimulus (GO:0048584)	GO BP	1/77	0.175607	0.221109	5.33673	9.28328	TGFB2
Positive Regulation Of Synaptic Transmission (GO:0050806)	GO BP	1/77	0.175607	0.221109	5.33673	9.28328	EIF2AK4
Neutrophil Migration (GO:1990266)	GO BP	1/77	0.175607	0.221109	5.33673	9.28328	TGFB2
Regulation Of T Cell Proliferation (GO:0042129)	GO BP	1/77	0.175607	0.221109	5.33673	9.28328	DLG5
Embryonic Organ Development (GO:0048568)	GO BP	1/77	0.175607	0.221109	5.33673	9.28328	TGFB2
Organonitrogen Compound Catabolic Process (GO:1901565)	GO BP	1/78	0.177676	0.223262	5.26716	9.10056	CHEK2
Regulation Of Neuron Differentiation (GO:0045664)	GO BP	1/79	0.17974	0.224495	5.19937	8.92339	EIF2AK4
Cellular Response To UV (GO:0034644)	GO BP	1/79	0.17974	0.224495	5.19937	8.92339	EIF2AK4
Response To Insulin (GO:0032868)	GO BP	1/79	0.17974	0.224495	5.19937	8.92339	INSR
Regulation Of Organelle Assembly (GO:1902115)	GO BP	1/80	0.181799	0.226611	5.1333	8.75153	SDCCAG8
Histone Modification (GO:0016570)	GO BP	1/81	0.183852	0.228256	5.06888	8.58476	JADE2
Macromolecule Modification (GO:0043412)	GO BP	1/81	0.183852	0.228256	5.06888	8.58476	YES1
Positive Regulation Of Cellular Process (GO:0048522)	GO BP	3/594	0.185247	0.229529	2.09083	3.52528	TGFB2;INSR;NRG1
Supramolecular Fiber Organization (GO:0097435)	GO BP	2/316	0.186903	0.231121	2.60563	4.37006	TMOD1;TGFB2
Vascular Transport (GO:0010232)	GO BP	1/83	0.187945	0.231948	4.94475	8.26568	INSR
Transport Across Blood-Brain Barrier (GO:0150104)	GO BP	1/85	0.192017	0.233727	4.82653	7.9646	INSR
Regulation Of Kinase Activity (GO:0043549)	GO BP	1/85	0.192017	0.233727	4.82653	7.9646	INSR
Regulation Of Osteoblast Differentiation (GO:0045667)	GO BP	1/85	0.192017	0.233727	4.82653	7.9646	HEMGN
Nuclear-Transcribed mRNA Catabolic Process (GO:0000956)	GO BP	1/85	0.192017	0.233727	4.82653	7.9646	SAMD4A
Macromolecule Catabolic Process (GO:0009057)	GO BP	1/85	0.192017	0.233727	4.82653	7.9646	CHEK2
Mitotic Spindle Organization (GO:0007052)	GO BP	1/85	0.192017	0.233727	4.82653	7.9646	CHEK2
Positive Regulation Of Amide Metabolic Process (GO:0034250)	GO BP	1/85	0.192017	0.233727	4.82653	7.9646	SAMD4A
Glucose Homeostasis (GO:0042593)	GO BP	1/87	0.196069	0.238193	4.71381	7.68016	INSR
Protein-Containing Complex Assembly (GO:0065003)	GO BP	2/328	0.197774	0.23878	2.50818	4.06483	SMAD3;NRG1
Regulation Of Double-Strand Break Repair (GO:2000779)	GO BP	1/88	0.198088	0.23878	4.65939	7.54377	RAD51
Positive Regulation Of Plasma Membrane Bounded Cell Projection Assembly (GO:0120034)	GO BP	1/88	0.198088	0.23878	4.65939	7.54377	SAXO1
Positive Regulation Of Cell Adhesion (GO:0045785)	GO BP	1/88	0.198088	0.23878	4.65939	7.54377	TGFB2
Cellular Response To Peptide Hormone Stimulus (GO:0071375)	GO BP	1/89	0.200101	0.240741	4.60622	7.41108	INSR
Regulation Of Peptidyl-Tyrosine Phosphorylation (GO:0050730)	GO BP	1/90	0.20211	0.242688	4.55423	7.28196	NRG1
Regulation Of Epithelial Cell Proliferation (GO:0050678)	GO BP	1/91	0.204114	0.243216	4.5034	7.15626	TGFB2
Positive Regulation Of MAP Kinase Activity (GO:0043406)	GO BP	1/91	0.204114	0.243216	4.5034	7.15626	INSR
Positive Regulation Of Binding (GO:0051099)	GO BP	1/91	0.204114	0.243216	4.5034	7.15626	TERT
Regulation Of Actin Cytoskeleton Organization (GO:0032956)	GO BP	1/91	0.204114	0.243216	4.5034	7.15626	NRG1
Positive Regulation Of Protein Kinase B Signaling (GO:0051897)	GO BP	1/93	0.208106	0.247499	4.40506	6.91464	INSR
Muscle Contraction (GO:0006936)	GO BP	1/94	0.210095	0.249388	4.35747	6.7985	TMOD1
Positive Regulation Of Transmembrane Receptor Protein Serine/Threonine Kinase Signaling Pathway (GO:0090100)	GO BP	1/95	0.21208	0.25031	4.3109	6.68532	TGFB2
Recombinational Repair (GO:0000725)	GO BP	1/95	0.21208	0.25031	4.3109	6.68532	RAD51
Positive Regulation Of Epithelial Cell Migration (GO:0010634)	GO BP	1/95	0.21208	0.25031	4.3109	6.68532	TGFB2
Regulation Of Protein Metabolic Process (GO:0051246)	GO BP	1/96	0.214059	0.252168	4.26531	6.57499	CHEK2
Positive Regulation Of Protein-Containing Complex Assembly (GO:0031334)	GO BP	1/98	0.218003	0.256328	4.17694	6.36252	NRG1
Cellular Response To Insulin Stimulus (GO:0032869)	GO BP	1/99	0.219967	0.25815	4.13411	6.26019	INSR
Antimicrobial Humoral Response (GO:0019730)	GO BP	1/100	0.221927	0.259471	4.09215	6.16035	NRG1
Response To UV (GO:0009411)	GO BP	1/100	0.221927	0.259471	4.09215	6.16035	EIF2AK4
rRNA Processing (GO:0006364)	GO BP	1/101	0.223882	0.261266	4.05102	6.06291	MPHOSPH6
Calcium Ion Homeostasis (GO:0055074)	GO BP	1/102	0.225832	0.262066	4.01071	5.96779	RMDN3
Protein Catabolic Process (GO:0030163)	GO BP	1/102	0.225832	0.262066	4.01071	5.96779	CHEK2
Regulation Of Protein Secretion (GO:0050708)	GO BP	1/102	0.225832	0.262066	4.01071	5.96779	TGFB2
Positive Regulation Of Kinase Activity (GO:0033674)	GO BP	1/104	0.229718	0.266079	3.93244	5.78423	INSR
Positive Regulation Of Stress-Activated MAPK Cascade (GO:0032874)	GO BP	1/105	0.231654	0.266831	3.89443	5.69565	TGFB2
Intrinsic Apoptotic Signaling Pathway (GO:0097193)	GO BP	1/105	0.231654	0.266831	3.89443	5.69565	CHEK2
Regulation Of Neuron Apoptotic Process (GO:0043523)	GO BP	1/105	0.231654	0.266831	3.89443	5.69565	TGFB2
Positive Regulation Of Cell Growth (GO:0030307)	GO BP	1/106	0.233585	0.268558	3.85714	5.6091	TGFB2
Regulation Of Cellular Response To Stress (GO:0080135)	GO BP	1/107	0.235511	0.269775	3.82056	5.52453	RAD51
Negative Regulation Of Translation (GO:0017148)	GO BP	1/107	0.235511	0.269775	3.82056	5.52453	EIF2AK4
Positive Regulation Of Metabolic Process (GO:0009893)	GO BP	1/108	0.237432	0.270482	3.78467	5.44187	INSR
Positive Regulation Of Translation (GO:0045727)	GO BP	1/108	0.237432	0.270482	3.78467	5.44187	SAMD4A
Positive Regulation Of DNA Metabolic Process (GO:0051054)	GO BP	1/108	0.237432	0.270482	3.78467	5.44187	RAD51
Negative Regulation Of Developmental Process (GO:0051093)	GO BP	1/109	0.239349	0.271175	3.74943	5.36106	ANP32B
Positive Regulation Of Wnt Signaling Pathway (GO:0030177)	GO BP	1/109	0.239349	0.271175	3.74943	5.36106	TERT
Regulation Of Wnt Signaling Pathway (GO:0030111)	GO BP	1/109	0.239349	0.271175	3.74943	5.36106	TERT
Regulation Of JNK Cascade (GO:0046328)	GO BP	1/110	0.241261	0.271545	3.71485	5.28205	MECOM
Positive Regulation Of Protein Phosphorylation (GO:0001934)	GO BP	2/377	0.24285	0.271545	2.175	3.0783	TGFB2;INSR
Negative Regulation Of Inflammatory Response (GO:0050728)	GO BP	1/111	0.243169	0.271545	3.68089	5.20478	YES1
T Cell Activation (GO:0042110)	GO BP	1/111	0.243169	0.271545	3.68089	5.20478	EIF2AK4
Regulation Of Transforming Growth Factor Beta Receptor Signaling Pathway (GO:0017015)	GO BP	1/111	0.243169	0.271545	3.68089	5.20478	SMAD3
Mitotic Cell Cycle Phase Transition (GO:0044772)	GO BP	1/111	0.243169	0.271545	3.68089	5.20478	CHEK2
Mitotic Sister Chromatid Segregation (GO:0000070)	GO BP	1/111	0.243169	0.271545	3.68089	5.20478	CHEK2
Double-Strand Break Repair Via Homologous Recombination (GO:0000724)	GO BP	1/111	0.243169	0.271545	3.68089	5.20478	RAD51
Regulation Of Cytoskeleton Organization (GO:0051493)	GO BP	1/114	0.248862	0.27691	3.58263	4.98291	NRG1
Regulation Of MAP Kinase Activity (GO:0043405)	GO BP	1/114	0.248862	0.27691	3.58263	4.98291	INSR
DNA Damage Response (GO:0006974)	GO BP	2/384	0.249346	0.276953	2.13438	2.96447	RAD51;CHEK2
Positive Regulation Of Protein Serine/Threonine Kinase Activity (GO:0071902)	GO BP	1/117	0.254514	0.282189	3.48944	4.77495	INSR
Regulation Of Protein Binding (GO:0043393)	GO BP	1/118	0.256389	0.283257	3.45945	4.70851	TERT
Positive Regulation Of Cell Cycle Process (GO:0090068)	GO BP	1/118	0.256389	0.283257	3.45945	4.70851	INSR
Regulation Of Protein-Containing Complex Assembly (GO:0043254)	GO BP	1/119	0.258259	0.284818	3.42996	4.64345	NRG1
Regulation Of Protein Catabolic Process (GO:0042176)	GO BP	1/122	0.263842	0.289946	3.34441	4.45611	CHEK2
Receptor-Mediated Endocytosis (GO:0006898)	GO BP	1/122	0.263842	0.289946	3.34441	4.45611	INSR
Regulation Of DNA Metabolic Process (GO:0051052)	GO BP	1/124	0.26754	0.293492	3.2897	4.33741	JADE2
Cellular Response To Starvation (GO:0009267)	GO BP	1/126	0.271221	0.297006	3.23673	4.22336	EIF2AK4
Regulation Of Response To External Stimulus (GO:0032101)	GO BP	1/127	0.273054	0.298488	3.21088	4.168	NRG1
Organelle Organization (GO:0006996)	GO BP	2/418	0.280963	0.306283	1.95653	2.48388	TERT;CCDC32
Epithelial Cell Differentiation (GO:0030855)	GO BP	1/132	0.282154	0.306283	3.08755	3.90668	JAG1
Plasma Membrane Bounded Cell Projection Organization (GO:0120036)	GO BP	1/132	0.282154	0.306283	3.08755	3.90668	CCDC32
Circulatory System Development (GO:0072359)	GO BP	1/132	0.282154	0.306283	3.08755	3.90668	TGFB2
Regulation Of Protein Kinase B Signaling (GO:0051896)	GO BP	1/136	0.289354	0.313551	2.99546	3.71469	INSR
Intracellular Calcium Ion Homeostasis (GO:0006874)	GO BP	1/139	0.294707	0.318456	2.9299	3.57968	RMDN3
Nervous System Development (GO:0007399)	GO BP	2/433	0.294905	0.318456	1.88699	2.30421	JAG1;NRG1
Protein Ubiquitination (GO:0016567)	GO BP	2/434	0.295833	0.318905	1.88252	2.29284	RAD51;TRIM14
Positive Regulation Of Transferase Activity (GO:0051347)	GO BP	1/143	0.301783	0.324756	2.8468	3.41059	INSR
Regulation Of Cell Adhesion (GO:0030155)	GO BP	1/144	0.303541	0.326084	2.82674	3.37015	NRG1
Neuron Projection Morphogenesis (GO:0048812)	GO BP	1/146	0.307044	0.328712	2.78747	3.29135	EIF2AK4
Positive Regulation Of Cellular Catabolic Process (GO:0031331)	GO BP	1/146	0.307044	0.328712	2.78747	3.29135	INSR
Negative Regulation Of DNA-binding Transcription Factor Activity (GO:0043433)	GO BP	1/149	0.312267	0.333156	2.73056	3.17809	EIF2AK4
Skeletal System Development (GO:0001501)	GO BP	1/149	0.312267	0.333156	2.73056	3.17809	TGFB2
Neuron Development (GO:0048666)	GO BP	1/150	0.313999	0.33443	2.71209	3.1416	TGFB2
Negative Regulation Of Nucleic Acid-Templated Transcription (GO:1903507)	GO BP	2/456	0.316218	0.336218	1.78928	2.06004	MECOM;NRG1
Cellular Response To Organic Cyclic Compound (GO:0071407)	GO BP	1/152	0.317451	0.336379	2.6759	3.07042	RAD51
Positive Regulation Of NF-kappaB Transcription Factor Activity (GO:0051092)	GO BP	1/152	0.317451	0.336379	2.6759	3.07042	TRIM14
Positive Regulation Of Response To External Stimulus (GO:0032103)	GO BP	1/155	0.322596	0.34067	2.62338	2.96797	NRG1
Cellular Response To Growth Factor Stimulus (GO:0071363)	GO BP	1/155	0.322596	0.34067	2.62338	2.96797	SMAD3
Regulation Of Macromolecule Metabolic Process (GO:0060255)	GO BP	1/162	0.334455	0.351999	2.50843	2.74736	NRG1
Mitochondrion Organization (GO:0007005)	GO BP	1/162	0.334455	0.351999	2.50843	2.74736	TERT
Adenylate Cyclase-Modulating G Protein-Coupled Receptor Signaling Pathway (GO:0007188)	GO BP	1/163	0.336133	0.352571	2.49282	2.71779	GPR37
Nitrogen Compound Transport (GO:0071705)	GO BP	1/163	0.336133	0.352571	2.49282	2.71779	NRG1
Positive Regulation Of Gene Expression (GO:0010628)	GO BP	2/480	0.338321	0.354268	1.69735	1.83952	SMAD3;SAMD4A
Cell-Cell Adhesion Via Plasma-Membrane Adhesion Molecules (GO:0098742)	GO BP	1/172	0.351044	0.366974	2.36054	2.47112	TGFB2
Neuron Differentiation (GO:0030182)	GO BP	1/173	0.352681	0.368066	2.3467	2.44571	TGFB2
Extracellular Matrix Organization (GO:0030198)	GO BP	1/176	0.357566	0.372539	2.30612	2.3717	TGFB2
Positive Regulation Of ERK1 And ERK2 Cascade (GO:0070374)	GO BP	1/179	0.362415	0.37696	2.26691	2.30084	NRG1
Macromolecule Biosynthetic Process (GO:0009059)	GO BP	1/183	0.368825	0.382987	2.21664	2.21095	TERT
Endocytosis (GO:0006897)	GO BP	1/189	0.378321	0.392193	2.14525	2.08521	INSR
Intracellular Monoatomic Cation Homeostasis (GO:0030003)	GO BP	1/190	0.37989	0.393164	2.13379	2.06524	RMDN3
Positive Regulation Of Protein Metabolic Process (GO:0051247)	GO BP	1/196	0.389223	0.402154	2.0675	1.9509	SAMD4A
DNA-templated Transcription (GO:0006351)	GO BP	1/199	0.393838	0.406247	2.03587	1.89706	POLR1C
Organic Substance Transport (GO:0071702)	GO BP	1/201	0.396895	0.408723	2.01531	1.86231	NRG1
Positive Regulation Of Transcription By RNA Polymerase II (GO:0045944)	GO BP	3/938	0.418122	0.429871	1.2981	1.13192	SMAD3;JAG1;NFIA
Positive Regulation Of Cell Motility (GO:2000147)	GO BP	1/221	0.42665	0.437915	1.83024	1.55898	INSR
Positive Regulation Of Protein Modification Process (GO:0031401)	GO BP	1/225	0.432426	0.443112	1.79719	1.50666	INSR
Cilium Organization (GO:0044782)	GO BP	1/228	0.436721	0.446777	1.77317	1.469	CCDC32
Negative Regulation Of Intracellular Signal Transduction (GO:1902532)	GO BP	1/231	0.440984	0.449659	1.74978	1.43263	DLG5
Positive Regulation Of Phosphorylation (GO:0042327)	GO BP	1/231	0.440984	0.449659	1.74978	1.43263	INSR
Regulation Of ERK1 And ERK2 Cascade (GO:0070372)	GO BP	1/244	0.459093	0.467358	1.65508	1.28848	NRG1
Positive Regulation Of Programmed Cell Death (GO:0043068)	GO BP	1/245	0.460462	0.467986	1.64821	1.27823	NRG1
Negative Regulation Of DNA-templated Transcription (GO:0045892)	GO BP	3/1025	0.476022	0.483011	1.18216	0.877508	SMAD3;MECOM;NRG1
Negative Regulation Of Signal Transduction (GO:0009968)	GO BP	1/267	0.489735	0.496116	1.5102	1.07812	NRG1
Chromatin Organization (GO:0006325)	GO BP	1/268	0.491028	0.496617	1.50447	1.07006	ANP32B
Regulation Of Intracellular Signal Transduction (GO:1902531)	GO BP	1/297	0.527157	0.532291	1.35507	0.867596	CHEK2
Regulation Of Apoptotic Process (GO:0042981)	GO BP	2/705	0.530332	0.53463	1.14077	0.723533	NRG1;ANP32B
Regulation Of Transcription By RNA Polymerase II (GO:0006357)	GO BP	5/2028	0.581874	0.58564	0.984621	0.533174	SMAD3;JAG1;MECOM;NFIA;JADE2
Positive Regulation Of Macromolecule Metabolic Process (GO:0010604)	GO BP	1/364	0.601289	0.603229	1.1012	0.560157	SMAD3
Protein Modification By Small Protein Conjugation (GO:0032446)	GO BP	1/364	0.601289	0.603229	1.1012	0.560157	TRIM14
Negative Regulation Of Programmed Cell Death (GO:0043069)	GO BP	1/381	0.618208	0.619203	1.05102	0.505468	MECOM
Negative Regulation Of Transcription By RNA Polymerase II (GO:0000122)	GO BP	1/763	0.857336	0.857336	0.5139	0.0791023	SMAD3
Platelet Alpha Granule Lumen (GO:0031093)	GO CC	2/66	0.0118651	0.267126	12.9466	57.4073	TGFB2;NRG1
Spindle Microtubule (GO:0005876)	GO CC	2/68	0.0125609	0.267126	12.553	54.9467	RMDN3;HAUS6
Platelet Alpha Granule (GO:0031091)	GO CC	2/89	0.0208877	0.267126	9.51293	36.8017	TGFB2;NRG1
Transferase Complex, Transferring Phosphorus-Containing Groups (GO:0061695)	GO CC	1/9	0.0222806	0.267126	50.8724	193.521	TERT
RNA Polymerase I Complex (GO:0005736)	GO CC	1/12	0.0295988	0.267126	36.9926	130.215	POLR1C
Mitotic Spindle Microtubule (GO:1990498)	GO CC	1/13	0.0320262	0.267126	33.9082	116.685	HAUS6
Cell-Cell Junction (GO:0005911)	GO CC	3/299	0.0387161	0.267126	4.23821	13.7805	JAG1;DLG5;SDCCAG8
Protein Kinase Complex (GO:1902911)	GO CC	1/17	0.0416767	0.267126	25.426	80.7992	INSR
RNA Polymerase III Complex (GO:0005666)	GO CC	1/17	0.0416767	0.267126	25.426	80.7992	POLR1C
Nuclear Lumen (GO:0031981)	GO CC	5/780	0.0445516	0.267126	2.7491	8.55275	RAD51;TERT;INSR;ANP32B;MPHOSPH6
Adherens Junction (GO:0005912)	GO CC	2/150	0.0541637	0.267126	5.57489	16.255	JAG1;DLG5
Histone Acetyltransferase Complex (GO:0000123)	GO CC	1/27	0.0653922	0.267126	15.6389	42.6529	JADE2
Condensed Nuclear Chromosome (GO:0000794)	GO CC	1/28	0.0677318	0.267126	15.059	40.5417	RAD51
Dendrite Membrane (GO:0032590)	GO CC	1/28	0.0677318	0.267126	15.059	40.5417	INSR
Endolysosome (GO:0036019)	GO CC	1/28	0.0677318	0.267126	15.059	40.5417	NRG1
Myofibril (GO:0030016)	GO CC	1/29	0.0700658	0.267126	14.5204	38.5999	TMOD1
Nuclear Inner Membrane (GO:0005637)	GO CC	1/31	0.0747165	0.2681	13.551	35.1521	SMAD3
Axon (GO:0030424)	GO CC	2/205	0.0930487	0.315332	4.05316	9.62477	TGFB2;INSR
Nucleolus (GO:0005730)	GO CC	4/771	0.126078	0.369827	2.17482	4.50373	TERT;POLR1C;ANP32B;MPHOSPH6
Sperm Flagellum (GO:0036126)	GO CC	1/60	0.139645	0.369827	6.88032	13.545	SAXO1
Condensed Chromosome (GO:0000793)	GO CC	1/60	0.139645	0.369827	6.88032	13.545	RAD51
Caveola (GO:0005901)	GO CC	1/62	0.143954	0.369827	6.65406	12.8973	INSR
9+2 Motile Cilium (GO:0097729)	GO CC	1/70	0.160981	0.369827	5.88021	10.74	SAXO1
Actin Filament (GO:0005884)	GO CC	1/71	0.163086	0.369827	5.79592	10.5108	TMOD1
Motile Cilium (GO:0031514)	GO CC	1/73	0.16728	0.369827	5.63435	10.0747	SAXO1
Extrinsic Component Of Cytoplasmic Side Of Plasma Membrane (GO:0031234)	GO CC	1/77	0.175607	0.369827	5.33673	9.28328	YES1
Intracellular Non-Membrane-Bounded Organelle (GO:0043232)	GO CC	5/1195	0.177061	0.369827	1.75163	3.03253	EPB41L4A;TERT;ANP32B;SAXO1;MPHOSPH6
Intermediate Filament Cytoskeleton (GO:0045111)	GO CC	1/81	0.183852	0.369827	5.06888	8.58476	RAD51
Plasma Membrane Raft (GO:0044853)	GO CC	1/82	0.185901	0.369827	5.00605	8.42288	INSR
Secretory Granule Lumen (GO:0034774)	GO CC	2/316	0.186903	0.369827	2.60563	4.37006	TGFB2;NRG1
P-body (GO:0000932)	GO CC	1/83	0.187945	0.369827	4.94475	8.26568	SAMD4A
Nuclear Chromosome (GO:0000228)	GO CC	1/95	0.21208	0.404277	4.3109	6.68532	RAD51
Collagen-Containing Extracellular Matrix (GO:0062023)	GO CC	2/373	0.239142	0.44205	2.1989	3.14596	TGFB2;NRG1
Cytoplasmic Side Of Plasma Membrane (GO:0009898)	GO CC	1/124	0.26754	0.479999	3.2897	4.33741	YES1
Asymmetric Synapse (GO:0032279)	GO CC	1/133	0.283961	0.494903	3.06401	3.85734	DLG5
Mitotic Spindle (GO:0072686)	GO CC	1/143	0.301783	0.506825	2.8468	3.41059	HAUS6
Mitochondrial Outer Membrane (GO:0005741)	GO CC	1/151	0.315727	0.506825	2.69388	3.10571	RMDN3
Postsynaptic Density (GO:0014069)	GO CC	1/151	0.315727	0.506825	2.69388	3.10571	DLG5
Chromosome (GO:0005694)	GO CC	1/164	0.337806	0.528363	2.4774	2.68868	RAD51
Organelle Outer Membrane (GO:0031968)	GO CC	1/170	0.347759	0.530333	2.38872	2.52307	RMDN3
Microtubule (GO:0005874)	GO CC	1/185	0.372006	0.553472	2.19232	2.16787	RMDN3
Neuron Projection (GO:0043005)	GO CC	2/557	0.407647	0.582291	1.45608	1.30662	TGFB2;INSR
Spindle (GO:0005819)	GO CC	1/210	0.410468	0.582291	1.92764	1.71649	RMDN3
Nuclear Membrane (GO:0031965)	GO CC	1/227	0.435293	0.601957	1.78111	1.48141	SMAD3
Cytoskeleton (GO:0005856)	GO CC	2/599	0.444067	0.601957	1.35071	1.09648	EPB41L4A;SAXO1
Cilium (GO:0005929)	GO CC	1/257	0.476627	0.627288	1.56999	1.1634	SAXO1
Polymeric Cytoskeletal Fiber (GO:0099513)	GO CC	1/265	0.487139	0.627288	1.5218	1.09449	TMOD1
Dendrite (GO:0030425)	GO CC	1/270	0.493604	0.627288	1.49313	1.05419	INSR
Actin Cytoskeleton (GO:0015629)	GO CC	1/327	0.561885	0.69949	1.2285	0.708176	TMOD1
Endosome Membrane (GO:0010008)	GO CC	1/361	0.598228	0.703632	1.11054	0.570579	INSR
Bounding Membrane Of Organelle (GO:0098588)	GO CC	2/819	0.612823	0.703632	0.975775	0.477817	INSR;CHST14
Focal Adhesion (GO:0005925)	GO CC	1/387	0.62401	0.703632	1.03437	0.487796	YES1
Cytoplasmic Vesicle Membrane (GO:0030659)	GO CC	1/389	0.625924	0.703632	1.02893	0.48208	INSR
Cell-Substrate Junction (GO:0030055)	GO CC	1/395	0.631611	0.703632	1.01295	0.465432	YES1
Organelle Inner Membrane (GO:0019866)	GO CC	1/398	0.634423	0.703632	1.00514	0.457379	SMAD3
Golgi Membrane (GO:0000139)	GO CC	1/427	0.660539	0.719516	0.935326	0.387879	CHST14
Lysosome (GO:0005764)	GO CC	1/503	0.720614	0.771184	0.790633	0.259052	NRG1
Mitochondrial Membrane (GO:0031966)	GO CC	1/540	0.745959	0.784543	0.734959	0.215405	RMDN3
Nucleus (GO:0005634)	GO CC	9/4487	0.820744	0.848566	0.75844	0.149825	SMAD3;RAD51;MECOM;TERT;NFIA;CHEK2;INSR;ANP32B;MPHOSPH6
Intracellular Organelle Lumen (GO:0070013)	GO CC	1/856	0.88807	0.902871	0.455782	0.0541038	INSR
Intracellular Membrane-Bounded Organelle (GO:0043231)	GO CC	8/5175	0.966388	0.966388	0.54496	0.0186324	SMAD3;RAD51;MECOM;TERT;NFIA;CHEK2;ANP32B;MPHOSPH6
5'-3' RNA Polymerase Activity (GO:0034062)	GO MF	2/18	0.000913471	0.0488707	51.9115	363.29	TERT;POLR1C
Transforming Growth Factor Beta Receptor Binding (GO:0005160)	GO MF	2/18	0.000913471	0.0488707	51.9115	363.29	TGFB2;SMAD3
Transcription Coactivator Binding (GO:0001223)	GO MF	2/34	0.00326501	0.103843	25.9349	148.464	SMAD3;TERT
tRNA Binding (GO:0000049)	GO MF	2/51	0.0072225	0.103843	16.9226	83.4379	TERT;EIF2AK4
Telomerase Activity (GO:0003720)	GO MF	1/5	0.0124388	0.103843	101.765	446.438	TERT
RNA-directed DNA Polymerase Activity (GO:0003964)	GO MF	1/5	0.0124388	0.103843	101.765	446.438	TERT
DEAD/H-box RNA Helicase Binding (GO:0017151)	GO MF	1/6	0.0149083	0.103843	81.4082	342.39	SMAD3
Insulin-Like Growth Factor II Binding (GO:0031995)	GO MF	1/6	0.0149083	0.103843	81.4082	342.39	INSR
Amyloid-Beta Binding (GO:0001540)	GO MF	2/79	0.0166955	0.103843	10.7538	44.0111	TGFB2;INSR
Growth Factor Activity (GO:0008083)	GO MF	2/85	0.0191628	0.103843	9.97339	39.4426	JAG1;NRG1
Histone H3K14 Acetyltransferase Activity (GO:0036408)	GO MF	1/8	0.0198292	0.103843	58.1429	227.955	JADE2
Histone H4K16 Acetyltransferase Activity (GO:0046972)	GO MF	1/8	0.0198292	0.103843	58.1429	227.955	JADE2
Type II Transforming Growth Factor Beta Receptor Binding (GO:0005114)	GO MF	1/8	0.0198292	0.103843	58.1429	227.955	TGFB2
Nuclear Glucocorticoid Receptor Binding (GO:0035259)	GO MF	1/8	0.0198292	0.103843	58.1429	227.955	SMAD3
Microtubule Binding (GO:0008017)	GO MF	3/239	0.0218718	0.103843	5.33195	20.3817	RMDN3;HAUS6;SAXO1
Phosphate Ion Binding (GO:0042301)	GO MF	1/9	0.0222806	0.103843	50.8724	193.521	CHST14
Histone H3K9 Methyltransferase Activity (GO:0046974)	GO MF	1/9	0.0222806	0.103843	50.8724	193.521	MECOM
co-SMAD Binding (GO:0070410)	GO MF	1/9	0.0222806	0.103843	50.8724	193.521	SMAD3
Cytidylyltransferase Activity (GO:0070567)	GO MF	1/9	0.0222806	0.103843	50.8724	193.521	NANS
Histone H4K12 Acetyltransferase Activity (GO:0043997)	GO MF	1/10	0.0247259	0.103843	45.2177	167.301	JADE2
Histone H4K5 Acetyltransferase Activity (GO:0043995)	GO MF	1/10	0.0247259	0.103843	45.2177	167.301	JADE2
Histone H4K8 Acetyltransferase Activity (GO:0043996)	GO MF	1/10	0.0247259	0.103843	45.2177	167.301	JADE2
Transcription Coregulator Binding (GO:0001221)	GO MF	2/99	0.0254701	0.103843	8.52792	31.2996	SMAD3;TERT
Protein Tyrosine Kinase Activity (GO:0004713)	GO MF	2/99	0.0254701	0.103843	8.52792	31.2996	YES1;INSR
Cytokine Receptor Binding (GO:0005126)	GO MF	2/100	0.025949	0.103843	8.44048	30.8214	TGFB2;SMAD3
RNA Polymerase I Activity (GO:0001054)	GO MF	1/11	0.0271653	0.103843	40.6939	146.735	POLR1C
Transmembrane Receptor Protein Tyrosine Kinase Activator Activity (GO:0030297)	GO MF	1/12	0.0295988	0.103843	36.9926	130.215	NRG1
Insulin-Like Growth Factor I Binding (GO:0031994)	GO MF	1/12	0.0295988	0.103843	36.9926	130.215	INSR
Ubiquitin Protein Ligase Binding (GO:0031625)	GO MF	3/271	0.0302176	0.103843	4.68768	16.4037	GPR37;SMAD3;CHEK2
Oxidoreductase Activity, Acting On The CH-NH Group Of Donors, NAD Or NADP As Acceptor (GO:0016646)	GO MF	1/13	0.0320262	0.103843	33.9082	116.685	MTHFR
Histone H3 Acetyltransferase Activity (GO:0010484)	GO MF	1/13	0.0320262	0.103843	33.9082	116.685	JADE2
Insulin-Like Growth Factor Receptor Binding (GO:0005159)	GO MF	1/13	0.0320262	0.103843	33.9082	116.685	INSR
I-SMAD Binding (GO:0070411)	GO MF	1/13	0.0320262	0.103843	33.9082	116.685	SMAD3
Nucleotidyltransferase Activity (GO:0016779)	GO MF	1/14	0.0344477	0.106605	31.2983	105.422	TERT
Ubiquitin-Like Protein Ligase Binding (GO:0044389)	GO MF	3/289	0.0355539	0.106605	4.38863	14.6436	GPR37;SMAD3;CHEK2
Insulin-Like Growth Factor Binding (GO:0005520)	GO MF	1/15	0.0368633	0.106605	29.0612	95.9177	INSR
RNA Polymerase III Activity (GO:0001056)	GO MF	1/15	0.0368633	0.106605	29.0612	95.9177	POLR1C
Receptor Ligand Activity (GO:0048018)	GO MF	3/319	0.0454584	0.121399	3.96593	12.2585	TGFB2;JAG1;NRG1
DNA Polymerase Binding (GO:0070182)	GO MF	1/19	0.0464665	0.121399	22.5986	69.3558	RAD51
R-SMAD Binding (GO:0070412)	GO MF	1/19	0.0464665	0.121399	22.5986	69.3558	SMAD3
Tubulin Binding (GO:0015631)	GO MF	3/322	0.0465172	0.121399	3.92803	12.0509	RMDN3;HAUS6;SAXO1
Histone H4 Acetyltransferase Activity (GO:0010485)	GO MF	1/20	0.0488525	0.124458	21.4082	64.6301	JADE2
Telomerase RNA Binding (GO:0070034)	GO MF	1/21	0.0512328	0.124589	20.3367	60.4281	TERT
DNA Polymerase Activity (GO:0034061)	GO MF	1/21	0.0512328	0.124589	20.3367	60.4281	TERT
bHLH Transcription Factor Binding (GO:0043425)	GO MF	1/22	0.0536072	0.124695	19.3673	56.6702	SMAD3
Single-Stranded DNA Helicase Activity (GO:0017116)	GO MF	1/22	0.0536072	0.124695	19.3673	56.6702	RAD51
DNA-binding Transcription Activator Activity, RNA Polymerase II-specific (GO:0001228)	GO MF	3/348	0.0562023	0.127392	3.6272	10.442	SMAD3;MECOM;NFIA
Chemorepellent Activity (GO:0045499)	GO MF	1/24	0.0583386	0.127392	17.6815	50.2417	NRG1
Notch Binding (GO:0005112)	GO MF	1/24	0.0583386	0.127392	17.6815	50.2417	JAG1
FAD Binding (GO:0071949)	GO MF	1/25	0.0606955	0.129888	16.9439	47.4748	MTHFR
Neuropeptide Binding (GO:0042923)	GO MF	1/28	0.0677318	0.142104	15.059	40.5417	GPR37
Protein Tyrosine Kinase Activator Activity (GO:0030296)	GO MF	1/29	0.0700658	0.144174	14.5204	38.5999	NRG1
Cytokine Activity (GO:0005125)	GO MF	2/178	0.0730949	0.147569	4.68134	12.2464	TGFB2;NRG1
Telomeric DNA Binding (GO:0042162)	GO MF	1/33	0.0793444	0.153801	12.7028	32.1884	TERT
DNA-directed 5'-3' RNA Polymerase Activity (GO:0003899)	GO MF	1/34	0.0816498	0.153801	12.3173	30.8586	POLR1C
Hsp70 Protein Binding (GO:0030544)	GO MF	1/34	0.0816498	0.153801	12.3173	30.8586	GPR37
Protein Homodimerization Activity (GO:0042803)	GO MF	4/662	0.0830319	0.153801	2.54949	6.34449	TGFB2;SMAD3;TERT;CHEK2
Histone H3 Methyltransferase Activity (GO:0140938)	GO MF	1/36	0.0862437	0.153801	11.6122	28.4567	MECOM
Neuropeptide Receptor Activity (GO:0008188)	GO MF	1/36	0.0862437	0.153801	11.6122	28.4567	GPR37
Non-Membrane Spanning Protein Tyrosine Kinase Activity (GO:0004715)	GO MF	1/36	0.0862437	0.153801	11.6122	28.4567	YES1
Sulfotransferase Activity (GO:0008146)	GO MF	1/38	0.0908151	0.159299	10.9835	26.3485	CHST14
Phosphotyrosine Residue Binding (GO:0001784)	GO MF	1/39	0.0930924	0.160659	10.6939	25.389	YES1
Signaling Receptor Complex Adaptor Activity (GO:0030159)	GO MF	1/44	0.104395	0.177306	9.44803	21.3485	DLG5
Protein Phosphorylated Amino Acid Binding (GO:0045309)	GO MF	1/45	0.106639	0.178287	9.23284	20.6659	YES1
Transmembrane Receptor Protein Tyrosine Kinase Activity (GO:0004714)	GO MF	1/50	0.117777	0.193878	8.28863	17.7291	INSR
Serine-Type Endopeptidase Inhibitor Activity (GO:0004867)	GO MF	1/53	0.124393	0.201668	7.80926	16.2769	NRG1
Protein-Lysine N-methyltransferase Activity (GO:0016279)	GO MF	1/54	0.126588	0.202163	7.66153	15.835	MECOM
Flavin Adenine Dinucleotide Binding (GO:0050660)	GO MF	1/55	0.128778	0.202636	7.51927	15.412	MTHFR
Receptor Tyrosine Kinase Binding (GO:0030971)	GO MF	1/59	0.137482	0.213196	6.9993	13.8884	NRG1
ATP Binding (GO:0005524)	GO MF	2/279	0.154049	0.235475	2.95924	5.5352	RAD51;INSR
DNA-binding Transcription Factor Binding (GO:0140297)	GO MF	2/282	0.156668	0.236106	2.92708	5.42571	SMAD3;NFIA
DNA Binding (GO:0003677)	GO MF	4/846	0.160269	0.238177	1.97336	3.61302	SMAD3;RAD51;MECOM;TERT
G Protein-Coupled Peptide Receptor Activity (GO:0008528)	GO MF	1/77	0.175607	0.257397	5.33673	9.28328	GPR37
Adenyl Ribonucleotide Binding (GO:0032559)	GO MF	2/309	0.180605	0.259366	2.66599	4.56269	RAD51;INSR
Ubiquitin Binding (GO:0043130)	GO MF	1/80	0.181799	0.259366	5.1333	8.75153	SMAD3
Protein Tyrosine Kinase Binding (GO:1990782)	GO MF	1/85	0.192017	0.27034	4.82653	7.9646	NRG1
Heme Binding (GO:0020037)	GO MF	1/87	0.196069	0.271736	4.71381	7.68016	NRG1
Protein Kinase Activator Activity (GO:0030295)	GO MF	1/88	0.198088	0.271736	4.65939	7.54377	NRG1
Zinc Ion Binding (GO:0008270)	GO MF	2/341	0.209641	0.28162	2.4104	3.76591	SMAD3;NRG1
Protein Serine/Threonine Kinase Activity (GO:0004674)	GO MF	2/342	0.210557	0.28162	2.40319	3.74416	CHEK2;EIF2AK4
Single-Stranded DNA Binding (GO:0003697)	GO MF	1/96	0.214059	0.282769	4.26531	6.57499	RAD51
Phosphatase Binding (GO:0019902)	GO MF	1/112	0.245071	0.315935	3.64755	5.1292	SMAD3
Endopeptidase Inhibitor Activity (GO:0004866)	GO MF	1/112	0.245071	0.315935	3.64755	5.1292	NRG1
Nuclear Receptor Binding (GO:0016922)	GO MF	1/115	0.250751	0.319409	3.55102	4.91211	SMAD3
Cis-Regulatory Region Sequence-Specific DNA Binding (GO:0000987)	GO MF	4/1098	0.294081	0.370197	1.49877	1.83434	SMAD3;MECOM;NFIA;ZNF257
RNA Polymerase II Cis-Regulatory Region Sequence-Specific DNA Binding (GO:0000978)	GO MF	4/1122	0.307765	0.382917	1.46473	1.72606	SMAD3;MECOM;NFIA;ZNF257
Transition Metal Ion Binding (GO:0046914)	GO MF	2/456	0.316218	0.388912	1.78928	2.06004	SMAD3;NRG1
Kinase Binding (GO:0019900)	GO MF	2/460	0.319913	0.388986	1.77329	2.02103	SMAD3;CHEK2
Purine Ribonucleoside Triphosphate Binding (GO:0035639)	GO MF	2/476	0.334649	0.402331	1.71203	1.87411	RAD51;INSR
Protein Kinase Binding (GO:0019901)	GO MF	2/511	0.366569	0.428959	1.59144	1.59712	SMAD3;CHEK2
RNA Polymerase II Transcription Regulatory Region Sequence-Specific DNA Binding (GO:0000977)	GO MF	4/1225	0.367143	0.428959	1.33383	1.3365	SMAD3;MECOM;NFIA;ZNF257
Actin Binding (GO:0003779)	GO MF	1/183	0.368825	0.428959	2.21664	2.21095	TMOD1
GTP Binding (GO:0005525)	GO MF	1/201	0.396895	0.456643	2.01531	1.86231	INSR
Transcription Regulatory Region Nucleic Acid Binding (GO:0001067)	GO MF	1/224	0.430988	0.486762	1.80534	1.51951	SMAD3
Guanyl Ribonucleotide Binding (GO:0032561)	GO MF	1/226	0.433862	0.486762	1.78912	1.49396	INSR
RNA Polymerase II-specific DNA-binding Transcription Factor Binding (GO:0061629)	GO MF	1/228	0.436721	0.486762	1.77317	1.469	SMAD3
G Protein-Coupled Receptor Activity (GO:0004930)	GO MF	1/250	0.467256	0.515427	1.6147	1.22859	GPR37
mRNA Binding (GO:0003729)	GO MF	1/282	0.508795	0.555521	1.4285	0.965251	SAMD4A
Sequence-Specific DNA Binding (GO:0043565)	GO MF	2/717	0.539535	0.581745	1.12092	0.691661	SMAD3;TERT
Ubiquitin Protein Ligase Activity (GO:0061630)	GO MF	1/311	0.543687	0.581745	1.29296	0.787904	TRIM14
Ubiquitin-Like Protein Ligase Activity (GO:0061659)	GO MF	1/319	0.552877	0.585721	1.25992	0.746651	TRIM14
Ubiquitin-Protein Transferase Activity (GO:0004842)	GO MF	1/412	0.647267	0.678996	0.970207	0.422036	TRIM14
RNA Binding (GO:0003723)	GO MF	3/1411	0.694753	0.719197	0.840577	0.306137	TERT;SAMD4A;EIF2AK4
Transcription Cis-Regulatory Region Binding (GO:0000976)	GO MF	1/474	0.699033	0.719197	0.840359	0.300897	SMAD3
Metal Ion Binding (GO:0046872)	GO MF	1/521	0.733239	0.747206	0.762559	0.236609	NRG1
Double-Stranded DNA Binding (GO:0003690)	GO MF	1/650	0.808726	0.816355	0.606931	0.128848	RAD51
Sequence-Specific Double-Stranded DNA Binding (GO:1990837)	GO MF	1/715	0.838379	0.838379	0.54982	0.096925	SMAD3
Adherens junction	KEGG	3/71	0.000745521	0.0245423	18.6627	134.398	SMAD3;YES1;INSR
Chronic myeloid leukemia	KEGG	3/76	0.000908975	0.0245423	17.3801	121.716	TGFB2;SMAD3;MECOM
Pancreatic cancer	KEGG	3/76	0.000908975	0.0245423	17.3801	121.716	TGFB2;SMAD3;RAD51
Pathways in cancer	KEGG	6/531	0.00200892	0.0351828	5.04545	31.3331	TGFB2;SMAD3;JAG1;RAD51;MECOM;TERT
Human T-cell leukemia virus 1 infection	KEGG	4/219	0.00217178	0.0351828	7.9818	48.9461	TGFB2;SMAD3;TERT;CHEK2
Cell cycle	KEGG	3/124	0.00368675	0.0497553	10.4602	58.6084	TGFB2;SMAD3;CHEK2
FoxO signaling pathway	KEGG	3/131	0.00429985	0.0497553	9.88464	53.8632	TGFB2;SMAD3;INSR
Gastric cancer	KEGG	3/149	0.00614862	0.0622547	8.65812	44.083	TGFB2;SMAD3;TERT
Cellular senescence	KEGG	3/156	0.00697737	0.0627963	8.25907	41.007	TGFB2;SMAD3;CHEK2
Hippo signaling pathway	KEGG	3/163	0.00786954	0.0629315	7.89495	38.2491	TGFB2;SMAD3;DLG5
Hepatocellular carcinoma	KEGG	3/168	0.00854625	0.0629315	7.65377	36.4493	TGFB2;SMAD3;TERT
Inflammatory bowel disease	KEGG	2/65	0.0115238	0.0777854	13.1528	58.7054	TGFB2;SMAD3
Diabetic cardiomyopathy	KEGG	3/203	0.0142324	0.0886787	6.30319	26.8027	TGFB2;SMAD3;INSR
Colorectal cancer	KEGG	2/86	0.0195881	0.113331	9.85417	38.7548	TGFB2;SMAD3
TGF-beta signaling pathway	KEGG	2/94	0.0231314	0.12491	8.99366	33.8752	TGFB2;SMAD3
AGE-RAGE signaling pathway in diabetic complications	KEGG	2/100	0.025949	0.131367	8.44048	30.8214	TGFB2;SMAD3
MAPK signaling pathway	KEGG	3/294	0.0371175	0.176854	4.31213	14.2027	TGFB2;MECOM;INSR
Apelin signaling pathway	KEGG	2/137	0.0460803	0.207361	6.11574	18.8204	SMAD3;JAG1
One carbon pool by folate	KEGG	1/20	0.0488525	0.208266	21.4082	64.6301	MTHFR
Hepatitis B	KEGG	2/162	0.062036	0.251246	5.15365	14.3273	TGFB2;SMAD3
RNA polymerase	KEGG	1/31	0.0747165	0.288192	13.551	35.1521	POLR1C
Aldosterone-regulated sodium reabsorption	KEGG	1/37	0.0885322	0.32596	11.2891	27.3692	INSR
Homologous recombination	KEGG	1/41	0.0976302	0.336484	10.1582	23.6337	RAD51
Type II diabetes mellitus	KEGG	1/46	0.108878	0.336484	9.02721	20.0181	INSR
Amino sugar and nucleotide sugar metabolism	KEGG	1/48	0.113338	0.336484	8.64221	18.8174	NANS
Malaria	KEGG	1/50	0.117777	0.336484	8.28863	17.7291	TGFB2
Ovarian steroidogenesis	KEGG	1/51	0.119988	0.336484	8.12245	17.2226	INSR
Autoimmune thyroid disease	KEGG	1/53	0.124393	0.336484	7.80926	16.2769	TG
Glycosaminoglycan biosynthesis	KEGG	1/53	0.124393	0.336484	7.80926	16.2769	CHST14
Fanconi anemia pathway	KEGG	1/54	0.126588	0.336484	7.66153	15.835	RAD51
Regulation of lipolysis in adipocytes	KEGG	1/55	0.128778	0.336484	7.51927	15.412	INSR
Notch signaling pathway	KEGG	1/59	0.137482	0.348001	6.9993	13.8884	JAG1
Lysine degradation	KEGG	1/63	0.146101	0.348063	6.54641	12.5918	MECOM
Cytosolic DNA-sensing pathway	KEGG	1/63	0.146101	0.348063	6.54641	12.5918	POLR1C
Renal cell carcinoma	KEGG	1/69	0.158871	0.367673	5.96699	10.9772	TGFB2
p53 signaling pathway	KEGG	1/73	0.16728	0.373306	5.63435	10.0747	CHEK2
Thyroid hormone synthesis	KEGG	1/75	0.171454	0.373306	5.48152	9.66634	TG
Leishmaniasis	KEGG	1/77	0.175607	0.373306	5.33673	9.28328	TGFB2
RNA degradation	KEGG	1/79	0.17974	0.373306	5.19937	8.92339	MPHOSPH6
ErbB signaling pathway	KEGG	1/85	0.192017	0.374543	4.82653	7.9646	NRG1
Human papillomavirus infection	KEGG	2/331	0.200505	0.374543	2.48493	3.99307	JAG1;TERT
Hypertrophic cardiomyopathy	KEGG	1/90	0.20211	0.374543	4.55423	7.28196	TGFB2
Th1 and Th2 cell differentiation	KEGG	1/92	0.206113	0.374543	4.45369	7.03386	JAG1
Rheumatoid arthritis	KEGG	1/93	0.208106	0.374543	4.40506	6.91464	TGFB2
Dilated cardiomyopathy	KEGG	1/96	0.214059	0.374543	4.26531	6.57499	TGFB2
Amoebiasis	KEGG	1/102	0.225832	0.374543	4.01071	5.96779	TGFB2
Longevity regulating pathway	KEGG	1/102	0.225832	0.374543	4.01071	5.96779	INSR
Chagas disease	KEGG	1/102	0.225832	0.374543	4.01071	5.96779	TGFB2
Th17 cell differentiation	KEGG	1/107	0.235511	0.374543	3.82056	5.52453	SMAD3
Insulin resistance	KEGG	1/108	0.237432	0.374543	3.78467	5.44187	INSR
HIF-1 signaling pathway	KEGG	1/109	0.239349	0.374543	3.74943	5.36106	INSR
TNF signaling pathway	KEGG	1/112	0.245071	0.374543	3.64755	5.1292	JAG1
Toxoplasmosis	KEGG	1/112	0.245071	0.374543	3.64755	5.1292	TGFB2
AMPK signaling pathway	KEGG	1/120	0.260124	0.390187	3.40096	4.57972	INSR
Osteoclast differentiation	KEGG	1/127	0.273054	0.402135	3.21088	4.168	TGFB2
Insulin signaling pathway	KEGG	1/137	0.291143	0.411573	2.97329	3.66887	INSR
Autophagy	KEGG	1/137	0.291143	0.411573	2.97329	3.66887	EIF2AK4
Measles	KEGG	1/139	0.294707	0.411573	2.9299	3.57968	EIF2AK4
Signaling pathways regulating pluripotency of stem cells	KEGG	1/143	0.301783	0.412343	2.8468	3.41059	SMAD3
Breast cancer	KEGG	1/147	0.308789	0.412343	2.76824	3.25295	JAG1
Phospholipase D signaling pathway	KEGG	1/148	0.31053	0.412343	2.74927	3.2152	INSR
mTOR signaling pathway	KEGG	1/154	0.320885	0.412601	2.64066	3.00156	INSR
Non-alcoholic fatty liver disease	KEGG	1/155	0.322596	0.412601	2.62338	2.96797	INSR
Hepatitis C	KEGG	1/157	0.326005	0.412601	2.58948	2.9024	EIF2AK4
Wnt signaling pathway	KEGG	1/166	0.34114	0.42071	2.44712	2.63179	SMAD3
cGMP-PKG signaling pathway	KEGG	1/167	0.342801	0.42071	2.43226	2.60399	INSR
Protein processing in endoplasmic reticulum	KEGG	1/171	0.349404	0.422414	2.37455	2.4969	EIF2AK4
Herpes simplex virus 1 infection	KEGG	2/498	0.35477	0.422594	1.63424	1.69354	EIF2AK4;ZNF257
Tuberculosis	KEGG	1/180	0.364023	0.427332	2.25413	2.27788	TGFB2
Proteoglycans in cancer	KEGG	1/205	0.402965	0.466288	1.97539	1.79544	TGFB2
Rap1 signaling pathway	KEGG	1/210	0.410468	0.46828	1.92764	1.71649	INSR
Ras signaling pathway	KEGG	1/232	0.442398	0.497697	1.74212	1.42078	INSR
Chemical carcinogenesis	KEGG	1/239	0.452197	0.501753	1.69028	1.34147	JAG1
Parkinson disease	KEGG	1/249	0.465904	0.507546	1.6213	1.23831	GPR37
Endocytosis	KEGG	1/252	0.46995	0.507546	1.60167	1.20947	SMAD3
Cytokine-cytokine receptor interaction	KEGG	1/295	0.524748	0.559271	1.36443	0.879836	TGFB2
MicroRNAs in cancer	KEGG	1/310	0.542525	0.570708	1.29721	0.793269	TGFB2
PI3K-Akt signaling pathway	KEGG	1/354	0.590996	0.613726	1.13297	0.595882	INSR
Amyotrophic lateral sclerosis	KEGG	1/364	0.601289	0.613919	1.1012	0.560157	NRG1
Alzheimer disease	KEGG	1/369	0.60634	0.613919	1.08596	0.543321	INSR
Pathways of neurodegeneration	KEGG	1/475	0.699804	0.699804	0.838543	0.299323	GPR37
TGF-beta Receptor Signaling Activates SMADs R-HSA-2173789	Reactome	2/44	0.00541877	0.183548	19.75	103.053	TGFB2;SMAD3
Cell Cycle R-HSA-1640170	Reactome	6/654	0.00559043	0.183548	4.06187	21.0677	STN1;RAD51;TERT;CHEK2;HAUS6;SDCCAG8
Signaling By ERBB2 R-HSA-1227986	Reactome	2/49	0.0066829	0.183548	17.6445	88.3673	YES1;NRG1
Extension Of Telomeres R-HSA-180786	Reactome	2/50	0.0069503	0.183548	17.276	85.8441	STN1;TERT
Synthesis Of PI R-HSA-1483226	Reactome	1/5	0.0124388	0.183548	101.765	446.438	CHEK2
GRB7 Events In ERBB2 Signaling R-HSA-1306955	Reactome	1/5	0.0124388	0.183548	101.765	446.438	NRG1
IRS Activation R-HSA-74713	Reactome	1/5	0.0124388	0.183548	101.765	446.438	INSR
RUNX3 Regulates BCL2L11 (BIM) Transcription R-HSA-8952158	Reactome	1/5	0.0124388	0.183548	101.765	446.438	SMAD3
Loss Of Nlp From Mitotic Centrosomes R-HSA-380259	Reactome	2/69	0.0129154	0.183548	12.365	53.7798	HAUS6;SDCCAG8
AURKA Activation By TPX2 R-HSA-8854518	Reactome	2/72	0.0140048	0.183548	11.8333	50.5089	HAUS6;SDCCAG8
SMAD2/3 Phosphorylation Motif Mutants In Cancer R-HSA-3304356	Reactome	1/6	0.0149083	0.183548	81.4082	342.39	SMAD3
Recruitment Of NuMA To Mitotic Centrosomes R-HSA-380320	Reactome	2/80	0.0170965	0.183548	10.6154	43.1927	HAUS6;SDCCAG8
RUNX3 Regulates CDKN1A Transcription R-HSA-8941855	Reactome	1/7	0.0173717	0.183548	67.8367	274.936	SMAD3
Constitutive Signaling By NOTCH1 t(7;9)(NOTCH1:M1580 K2555) Translocation Mutant R-HSA-2660826	Reactome	1/7	0.0173717	0.183548	67.8367	274.936	JAG1
Loss Of Function Of SMAD2/3 In Cancer R-HSA-3304349	Reactome	1/7	0.0173717	0.183548	67.8367	274.936	SMAD3
Loss Of Function Of TGFBR1 In Cancer R-HSA-3656534	Reactome	1/7	0.0173717	0.183548	67.8367	274.936	SMAD3
Centrosome Maturation R-HSA-380287	Reactome	2/81	0.0175017	0.183548	10.4805	42.3984	HAUS6;SDCCAG8
Signaling By NOTCH4 R-HSA-9013694	Reactome	2/81	0.0175017	0.183548	10.4805	42.3984	SMAD3;JAG1
Defective CHST14 Causes EDS, Musculocontractural Type R-HSA-3595174	Reactome	1/8	0.0198292	0.183548	58.1429	227.955	CHST14
Signaling By TGF-beta Receptor Complex In Cancer R-HSA-3304351	Reactome	1/8	0.0198292	0.183548	58.1429	227.955	SMAD3
Regulation Of PLK1 Activity At G2/M Transition R-HSA-2565942	Reactome	2/87	0.0200173	0.183548	9.73775	38.0859	HAUS6;SDCCAG8
Diseases Of Signal Transduction By Growth Factor Receptors And Second Messengers R-HSA-5663202	Reactome	4/424	0.0213072	0.183548	4.04348	15.5622	SMAD3;YES1;JAG1;NRG1
Signaling By TGF-beta Receptor Complex R-HSA-170834	Reactome	2/91	0.0217736	0.183548	9.29822	35.5848	TGFB2;SMAD3
Telomere Maintenance R-HSA-157579	Reactome	2/92	0.0222224	0.183548	9.19444	35.0001	STN1;TERT
Transcriptional Regulation By RUNX3 R-HSA-8878159	Reactome	2/95	0.0235916	0.183548	8.89651	33.334	SMAD3;JAG1
Anchoring Of Basal Body To Plasma Membrane R-HSA-5620912	Reactome	2/97	0.0245234	0.183548	8.70833	32.2916	HAUS6;SDCCAG8
PI3K Events In ERBB4 Signaling R-HSA-1250342	Reactome	1/10	0.0247259	0.183548	45.2177	167.301	NRG1
Signal Attenuation R-HSA-74749	Reactome	1/10	0.0247259	0.183548	45.2177	167.301	INSR
Dermatan Sulfate Biosynthesis R-HSA-2022923	Reactome	1/11	0.0271653	0.183548	40.6939	146.735	CHST14
NOTCH4 Activation And Transmission Of Signal To Nucleus R-HSA-9013700	Reactome	1/11	0.0271653	0.183548	40.6939	146.735	JAG1
PI5P, PP2A And IER3 Regulate PI3K/AKT Signaling R-HSA-6811558	Reactome	2/106	0.0288986	0.183548	7.95112	28.1785	INSR;NRG1
PIP3 Activates AKT Signaling R-HSA-1257604	Reactome	3/268	0.029373	0.183548	4.74147	16.7264	MECOM;INSR;NRG1
PECAM1 Interactions R-HSA-210990	Reactome	1/12	0.0295988	0.183548	36.9926	130.215	YES1
Telomere C-strand Synthesis Initiation R-HSA-174430	Reactome	1/12	0.0295988	0.183548	36.9926	130.215	STN1
Chk1/Chk2(Cds1) Mediated Inactivation Of Cyclin B:Cdk1 Complex R-HSA-75035	Reactome	1/13	0.0320262	0.183548	33.9082	116.685	CHEK2
SHC1 Events In ERBB4 Signaling R-HSA-1250347	Reactome	1/13	0.0320262	0.183548	33.9082	116.685	NRG1
Downregulation Of ERBB2:ERBB3 Signaling R-HSA-1358803	Reactome	1/13	0.0320262	0.183548	33.9082	116.685	NRG1
ERBB2 Activates PTK6 Signaling R-HSA-8847993	Reactome	1/13	0.0320262	0.183548	33.9082	116.685	NRG1
FCGR Activation R-HSA-2029481	Reactome	1/13	0.0320262	0.183548	33.9082	116.685	YES1
Negative Regulation Of PI3K/AKT Network R-HSA-199418	Reactome	2/113	0.0325011	0.183548	7.44707	25.5173	INSR;NRG1
RUNX3 Regulates NOTCH Signaling R-HSA-8941856	Reactome	1/14	0.0344477	0.183548	31.2983	105.422	JAG1
Chromosome Maintenance R-HSA-73886	Reactome	2/118	0.035177	0.183548	7.12428	23.8476	STN1;TERT
Signaling By TGFB Family Members R-HSA-9006936	Reactome	2/119	0.0357221	0.183548	7.06303	23.5339	TGFB2;SMAD3
GRB2 Events In ERBB2 Signaling R-HSA-1963640	Reactome	1/15	0.0368633	0.183548	29.0612	95.9177	NRG1
Constitutive Signaling By NOTCH1 HD Domain Mutants R-HSA-2691232	Reactome	1/15	0.0368633	0.183548	29.0612	95.9177	JAG1
Signaling By Activin R-HSA-1502540	Reactome	1/15	0.0368633	0.183548	29.0612	95.9177	SMAD3
EPHA-mediated Growth Cone Collapse R-HSA-3928663	Reactome	1/15	0.0368633	0.183548	29.0612	95.9177	YES1
ERBB2 Regulates Cell Motility R-HSA-6785631	Reactome	1/15	0.0368633	0.183548	29.0612	95.9177	NRG1
PI3K Events In ERBB2 Signaling R-HSA-1963642	Reactome	1/16	0.0392729	0.184458	27.1224	87.8013	NRG1
Regulation Of KIT Signaling R-HSA-1433559	Reactome	1/16	0.0392729	0.184458	27.1224	87.8013	YES1
Intracellular Signaling By Second Messengers R-HSA-9006925	Reactome	3/306	0.0410129	0.184458	4.13882	13.2189	MECOM;INSR;NRG1
FOXO-mediated Transcription Of Cell Cycle Genes R-HSA-9617828	Reactome	1/17	0.0416767	0.184458	25.426	80.7992	SMAD3
Gastrulation R-HSA-9758941	Reactome	1/17	0.0416767	0.184458	25.426	80.7992	SMAD3
Metabolism Of Folate And Pterines R-HSA-196757	Reactome	1/17	0.0416767	0.184458	25.426	80.7992	MTHFR
Regulation Of Signaling By CBL R-HSA-912631	Reactome	1/18	0.0440745	0.191524	23.9292	74.7039	YES1
Regulation Of TP53 Activity Thru Methylation R-HSA-6804760	Reactome	1/19	0.0464665	0.193211	22.5986	69.3558	CHEK2
Signaling By KIT In Disease R-HSA-9669938	Reactome	1/19	0.0464665	0.193211	22.5986	69.3558	YES1
NOTCH4 Intracellular Domain Regulates Transcription R-HSA-9013695	Reactome	1/20	0.0488525	0.193211	21.4082	64.6301	SMAD3
CTLA4 Inhibitory Signaling R-HSA-389513	Reactome	1/21	0.0512328	0.193211	20.3367	60.4281	YES1
Interleukin-37 Signaling R-HSA-9008059	Reactome	1/21	0.0512328	0.193211	20.3367	60.4281	SMAD3
SHC1 Events In ERBB2 Signaling R-HSA-1250196	Reactome	1/21	0.0512328	0.193211	20.3367	60.4281	NRG1
NOTCH2 Activation And Transmission Of Signal To Nucleus R-HSA-2979096	Reactome	1/21	0.0512328	0.193211	20.3367	60.4281	JAG1
Signaling By ERBB2 TMD/JMD Mutants R-HSA-9665686	Reactome	1/21	0.0512328	0.193211	20.3367	60.4281	NRG1
DNA Double-Strand Break Repair R-HSA-5693532	Reactome	2/149	0.053525	0.193211	5.6131	16.4329	RAD51;CHEK2
RNA Polymerase III Transcription Termination R-HSA-73980	Reactome	1/22	0.0536072	0.193211	19.3673	56.6702	NFIA
Signaling By NODAL R-HSA-1181150	Reactome	1/22	0.0536072	0.193211	19.3673	56.6702	SMAD3
Telomere Extension By Telomerase R-HSA-171319	Reactome	1/23	0.0559758	0.193211	18.4861	53.2924	TERT
Long-term Potentiation R-HSA-9620244	Reactome	1/23	0.0559758	0.193211	18.4861	53.2924	NRG1
Impaired BRCA2 Binding To PALB2 R-HSA-9709603	Reactome	1/24	0.0583386	0.193211	17.6815	50.2417	RAD51
RUNX2 Regulates Osteoblast Differentiation R-HSA-8940973	Reactome	1/24	0.0583386	0.193211	17.6815	50.2417	YES1
Signaling By ERBB2 KD Mutants R-HSA-9664565	Reactome	1/24	0.0583386	0.193211	17.6815	50.2417	NRG1
Polymerase Switching On C-strand Of Telomere R-HSA-174411	Reactome	1/25	0.0606955	0.193211	16.9439	47.4748	STN1
Defective HDR Thru Homologous Recombination (HRR) Due To BRCA1 Loss-Of-Function R-HSA-9701192	Reactome	1/25	0.0606955	0.193211	16.9439	47.4748	RAD51
NOTCH3 Activation And Transmission Of Signal To Nucleus R-HSA-9013507	Reactome	1/25	0.0606955	0.193211	16.9439	47.4748	JAG1
Signaling By ERBB2 In Cancer R-HSA-1227990	Reactome	1/25	0.0606955	0.193211	16.9439	47.4748	NRG1
Insulin Receptor Recycling R-HSA-77387	Reactome	1/26	0.0630467	0.193211	16.2653	44.9553	INSR
Downregulation Of TGF-beta Receptor Signaling R-HSA-2173788	Reactome	1/26	0.0630467	0.193211	16.2653	44.9553	SMAD3
Resolution Of D-loop Structures Thru Synthesis-Dependent Strand Annealing (SDSA) R-HSA-5693554	Reactome	1/27	0.0653922	0.193211	15.6389	42.6529	RAD51
Gene Expression (Transcription) R-HSA-74160	Reactome	7/1449	0.0673956	0.193211	2.08941	5.63551	SMAD3;YES1;JAG1;RAD51;NFIA;CHEK2;ZNF257
Molecules Associated With Elastic Fibres R-HSA-2129379	Reactome	1/28	0.0677318	0.193211	15.059	40.5417	TGFB2
FOXO-mediated Transcription Of Oxidative Stress, Metabolic And Neuronal Genes R-HSA-9615017	Reactome	1/29	0.0700658	0.193211	14.5204	38.5999	SMAD3
Downregulation Of ERBB2 Signaling R-HSA-8863795	Reactome	1/29	0.0700658	0.193211	14.5204	38.5999	NRG1
Activated NOTCH1 Transmits Signal To Nucleus R-HSA-2122948	Reactome	1/31	0.0747165	0.193211	13.551	35.1521	JAG1
RUNX2 Regulates Bone Development R-HSA-8941326	Reactome	1/31	0.0747165	0.193211	13.551	35.1521	YES1
Downregulation Of SMAD2/3:SMAD4 Transcriptional Activity R-HSA-2173795	Reactome	1/31	0.0747165	0.193211	13.551	35.1521	SMAD3
Generic Transcription Pathway R-HSA-212436	Reactome	6/1190	0.074977	0.193211	2.16132	5.59905	SMAD3;YES1;JAG1;RAD51;CHEK2;ZNF257
G2/M Transition R-HSA-69275	Reactome	2/182	0.0759533	0.193211	4.57639	11.7963	HAUS6;SDCCAG8
Signaling By NOTCH2 R-HSA-1980145	Reactome	1/32	0.0770333	0.193211	13.1132	33.616	JAG1
Nuclear Signaling By ERBB4 R-HSA-1251985	Reactome	1/32	0.0770333	0.193211	13.1132	33.616	NRG1
Mitotic G2-G2/M Phases R-HSA-453274	Reactome	2/184	0.0773958	0.193211	4.52564	11.5803	HAUS6;SDCCAG8
Cilium Assembly R-HSA-5617833	Reactome	2/186	0.0788471	0.193211	4.476	11.3701	HAUS6;SDCCAG8
Mitotic Prometaphase R-HSA-68877	Reactome	2/186	0.0788471	0.193211	4.476	11.3701	HAUS6;SDCCAG8
Striated Muscle Contraction R-HSA-390522	Reactome	1/33	0.0793444	0.193211	12.7028	32.1884	TMOD1
Telomere C-strand (Lagging Strand) Synthesis R-HSA-174417	Reactome	1/33	0.0793444	0.193211	12.7028	32.1884	STN1
Resolution Of D-loop Structures Thru Holliday Junction Intermediates R-HSA-5693568	Reactome	1/33	0.0793444	0.193211	12.7028	32.1884	RAD51
Sialic Acid Metabolism R-HSA-4085001	Reactome	1/33	0.0793444	0.193211	12.7028	32.1884	NANS
Signal Transduction R-HSA-162582	Reactome	10/2465	0.0813657	0.193211	1.78157	4.4696	TGFB2;GPR37;SMAD3;YES1;JAG1;MECOM;TERT;INSR;DLG5;NRG1
Transcriptional Regulation By E2F6 R-HSA-8953750	Reactome	1/34	0.0816498	0.193211	12.3173	30.8586	RAD51
CD28 Co-Stimulation R-HSA-389356	Reactome	1/34	0.0816498	0.193211	12.3173	30.8586	YES1
Resolution Of D-Loop Structures R-HSA-5693537	Reactome	1/34	0.0816498	0.193211	12.3173	30.8586	RAD51
EPHB-mediated Forward Signaling R-HSA-3928662	Reactome	1/34	0.0816498	0.193211	12.3173	30.8586	YES1
Impaired BRCA2 Binding To RAD51 R-HSA-9709570	Reactome	1/35	0.0839496	0.196705	11.9544	29.6174	RAD51
Regulation Of TP53 Degradation R-HSA-6804757	Reactome	1/36	0.0862437	0.19775	11.6122	28.4567	CHEK2
SMAD2/SMAD3:SMAD4 Heterotrimer Regulates Transcription R-HSA-2173796	Reactome	1/36	0.0862437	0.19775	11.6122	28.4567	SMAD3
HDR Thru Single Strand Annealing (SSA) R-HSA-5685938	Reactome	1/37	0.0885322	0.19775	11.2891	27.3692	RAD51
RHOV GTPase Cycle R-HSA-9013424	Reactome	1/37	0.0885322	0.19775	11.2891	27.3692	DLG5
Regulation Of TP53 Expression And Degradation R-HSA-6806003	Reactome	1/37	0.0885322	0.19775	11.2891	27.3692	CHEK2
FCGR3A-mediated IL10 Synthesis R-HSA-9664323	Reactome	1/38	0.0908151	0.19993	10.9835	26.3485	YES1
Signaling By NOTCH R-HSA-157118	Reactome	2/203	0.09152	0.19993	4.09391	9.78934	SMAD3;JAG1
RHOU GTPase Cycle R-HSA-9013420	Reactome	1/39	0.0930924	0.19993	10.6939	25.389	DLG5
Elastic Fibre Formation R-HSA-1566948	Reactome	1/39	0.0930924	0.19993	10.6939	25.389	TGFB2
Presynaptic Phase Of Homologous DNA Pairing And Strand Exchange R-HSA-5693616	Reactome	1/40	0.0953641	0.19993	10.4192	24.4856	RAD51
RNA Polymerase III Abortive And Retractive Initiation R-HSA-749476	Reactome	1/40	0.0953641	0.19993	10.4192	24.4856	NFIA
Diseases Associated With Glycosaminoglycan Metabolism R-HSA-3560782	Reactome	1/40	0.0953641	0.19993	10.4192	24.4856	CHST14
Defective Homologous Recombination Repair (HRR) Due To BRCA2 Loss Of Function R-HSA-9701190	Reactome	1/41	0.0976302	0.202321	10.1582	23.6337	RAD51
RND1 GTPase Cycle R-HSA-9696273	Reactome	1/42	0.0998908	0.202321	9.90991	22.8292	DLG5
RND3 GTPase Cycle R-HSA-9696264	Reactome	1/42	0.0998908	0.202321	9.90991	22.8292	DLG5
Signaling By SCF-KIT R-HSA-1433557	Reactome	1/42	0.0998908	0.202321	9.90991	22.8292	YES1
Homologous DNA Pairing And Strand Exchange R-HSA-5693579	Reactome	1/43	0.102146	0.20344	9.67347	22.0686	RAD51
RND2 GTPase Cycle R-HSA-9696270	Reactome	1/43	0.102146	0.20344	9.67347	22.0686	DLG5
Interleukin-3, Interleukin-5 And GM-CSF Signaling R-HSA-512988	Reactome	1/44	0.104395	0.206202	9.44803	21.3485	YES1
RNA Polymerase II Transcription R-HSA-73857	Reactome	6/1312	0.107422	0.210442	1.94668	4.34302	SMAD3;YES1;JAG1;RAD51;CHEK2;ZNF257
PKMTs Methylate Histone Lysines R-HSA-3214841	Reactome	1/47	0.111111	0.215898	8.83052	19.4027	MECOM
EPH-ephrin Mediated Repulsion Of Cells R-HSA-3928665	Reactome	1/49	0.11556	0.220593	8.46173	18.2601	YES1
Signaling By NOTCH3 R-HSA-9012852	Reactome	1/49	0.11556	0.220593	8.46173	18.2601	JAG1
Chondroitin Sulfate/Dermatan Sulfate Metabolism R-HSA-1793185	Reactome	1/50	0.117777	0.220593	8.28863	17.7291	CHST14
Chromatin Modifying Enzymes R-HSA-3247509	Reactome	2/238	0.119281	0.220593	3.48058	7.40066	MECOM;JADE2
Transcriptional Activity Of SMAD2/SMAD3:SMAD4 Heterotrimer R-HSA-2173793	Reactome	1/51	0.119988	0.220593	8.12245	17.2226	SMAD3
Ubiquitin Mediated Degradation Of Phosphorylated Cdc25A R-HSA-69601	Reactome	1/51	0.119988	0.220593	8.12245	17.2226	CHEK2
Diseases Of DNA Repair R-HSA-9675135	Reactome	1/51	0.119988	0.220593	8.12245	17.2226	RAD51
Signaling By Non-Receptor Tyrosine Kinases R-HSA-9006927	Reactome	1/52	0.122193	0.222933	7.96279	16.739	NRG1
Insulin Receptor Signaling Cascade R-HSA-74751	Reactome	1/53	0.124393	0.225228	7.80926	16.2769	INSR
Signaling By Receptor Tyrosine Kinases R-HSA-9006934	Reactome	3/496	0.12693	0.228092	2.51914	5.19981	YES1;INSR;NRG1
ECM Proteoglycans R-HSA-3000178	Reactome	1/55	0.128778	0.229686	7.51927	15.412	TGFB2
Stabilization Of P53 R-HSA-69541	Reactome	1/56	0.130962	0.230146	7.38219	15.0069	CHEK2
Meiotic Recombination R-HSA-912446	Reactome	1/56	0.130962	0.230146	7.38219	15.0069	RAD51
Signaling By ERBB4 R-HSA-1236394	Reactome	1/57	0.133141	0.232267	7.25	14.6185	NRG1
Constitutive Signaling By NOTCH1 HD+PEST Domain Mutants R-HSA-2894862	Reactome	1/58	0.135314	0.234348	7.12245	14.246	JAG1
Formation Of beta-catenin:TCF Transactivating Complex R-HSA-201722	Reactome	1/60	0.139645	0.235352	6.88032	13.545	TERT
Recruitment And ATM-mediated Phosphorylation Of Repair And Signal Proteins At DNA Double Strand Breaks R-HSA-5693565	Reactome	1/60	0.139645	0.235352	6.88032	13.545	CHEK2
FCGR3A-mediated Phagocytosis R-HSA-9664422	Reactome	1/60	0.139645	0.235352	6.88032	13.545	YES1
Post NMDA Receptor Activation Events R-HSA-438064	Reactome	1/61	0.141802	0.235352	6.76531	13.2148	NRG1
Regulation Of PTEN Gene Transcription R-HSA-8943724	Reactome	1/61	0.141802	0.235352	6.76531	13.2148	MECOM
DNA Double Strand Break Response R-HSA-5693606	Reactome	1/61	0.141802	0.235352	6.76531	13.2148	CHEK2
Synthesis Of Substrates In N-glycan Biosythesis R-HSA-446219	Reactome	1/63	0.146101	0.240814	6.54641	12.5918	NANS
FOXO-mediated Transcription R-HSA-9614085	Reactome	1/65	0.150378	0.243151	6.3412	12.014	SMAD3
p53-Dependent G1 DNA Damage Response R-HSA-69563	Reactome	1/65	0.150378	0.243151	6.3412	12.014	CHEK2
Organelle Biogenesis And Maintenance R-HSA-1852241	Reactome	2/275	0.150571	0.243151	3.00321	5.68603	HAUS6;SDCCAG8
G1/S DNA Damage Checkpoints R-HSA-69615	Reactome	1/67	0.154635	0.246385	6.14842	11.4772	CHEK2
HDR Thru Homologous Recombination (HRR) R-HSA-5685942	Reactome	1/67	0.154635	0.246385	6.14842	11.4772	RAD51
Costimulation By CD28 Family R-HSA-388841	Reactome	1/68	0.156756	0.24811	6.05635	11.2228	YES1
Activation Of NMDA Receptors And Postsynaptic Events R-HSA-442755	Reactome	1/74	0.16937	0.264571	5.55689	9.86721	NRG1
Signaling By NOTCH1 R-HSA-1980143	Reactome	1/74	0.16937	0.264571	5.55689	9.86721	JAG1
G2/M DNA Damage Checkpoint R-HSA-69473	Reactome	1/77	0.175607	0.269039	5.33673	9.28328	CHEK2
Biosynthesis Of N-glycan Precursor (Dolichol LLO) And Transfer To Protein R-HSA-446193	Reactome	1/77	0.175607	0.269039	5.33673	9.28328	NANS
Signaling By Insulin Receptor R-HSA-74752	Reactome	1/77	0.175607	0.269039	5.33673	9.28328	INSR
Constitutive Signaling By Aberrant PI3K In Cancer R-HSA-2219530	Reactome	1/78	0.177676	0.270475	5.26716	9.10056	NRG1
DNA Repair R-HSA-73894	Reactome	2/310	0.181503	0.274551	2.6572	4.53447	RAD51;CHEK2
Fcgamma Receptor (FCGR) Dependent Phagocytosis R-HSA-2029480	Reactome	1/87	0.196069	0.29472	4.71381	7.68016	YES1
Meiosis R-HSA-1500620	Reactome	1/88	0.198088	0.295894	4.65939	7.54377	RAD51
Interferon Gamma Signaling R-HSA-877300	Reactome	1/89	0.200101	0.297045	4.60622	7.41108	TRIM14
Regulation Of TP53 Activity Thru Phosphorylation R-HSA-6804756	Reactome	1/90	0.20211	0.298175	4.55423	7.28196	CHEK2
EPH-Ephrin Signaling R-HSA-2682334	Reactome	1/91	0.204114	0.299283	4.5034	7.15626	YES1
RAC3 GTPase Cycle R-HSA-9013423	Reactome	1/93	0.208106	0.303277	4.40506	6.91464	JAG1
Response Of EIF2AK4 (GCN2) To Amino Acid Deficiency R-HSA-9633012	Reactome	1/98	0.218003	0.315773	4.17694	6.36252	EIF2AK4
PI3K/AKT Signaling In Cancer R-HSA-2219528	Reactome	1/105	0.231654	0.333525	3.89443	5.69565	NRG1
HATs Acetylate Histones R-HSA-3214847	Reactome	1/106	0.233585	0.334292	3.85714	5.6091	JADE2
M Phase R-HSA-68886	Reactome	2/380	0.245633	0.349264	2.15741	3.02882	HAUS6;SDCCAG8
Reproduction R-HSA-1474165	Reactome	1/113	0.246969	0.349264	3.6148	5.05526	RAD51
HDR Thru Homologous Recombination (HRR) Or Single Strand Annealing (SSA) R-HSA-5693567	Reactome	1/114	0.248862	0.349871	3.58263	4.98291	RAD51
Cytokine Signaling In Immune System R-HSA-1280215	Reactome	3/702	0.256057	0.356786	1.75792	2.39491	SMAD3;YES1;TRIM14
Transcriptional Regulation By RUNX2 R-HSA-8878166	Reactome	1/119	0.258259	0.356786	3.42996	4.64345	YES1
Homology Directed Repair R-HSA-5693538	Reactome	1/119	0.258259	0.356786	3.42996	4.64345	RAD51
Glycosaminoglycan Metabolism R-HSA-1630316	Reactome	1/120	0.260124	0.357297	3.40096	4.57972	CHST14
Metabolism Of Water-Soluble Vitamins And Cofactors R-HSA-196849	Reactome	1/122	0.263842	0.359302	3.34441	4.45611	MTHFR
Disease R-HSA-1643685	Reactome	6/1736	0.26459	0.359302	1.43615	1.90947	SMAD3;YES1;JAG1;RAD51;NRG1;CHST14
Platelet Degranulation R-HSA-114608	Reactome	1/125	0.269383	0.363743	3.263	4.27982	TGFB2
Glycerophospholipid Biosynthesis R-HSA-1483206	Reactome	1/127	0.273054	0.366629	3.21088	4.168	CHEK2
Response To Elevated Platelet Cytosolic Ca2+ R-HSA-76005	Reactome	1/130	0.278528	0.371889	3.13574	4.00822	TGFB2
Cell Surface Interactions At Vascular Wall R-HSA-202733	Reactome	1/134	0.285763	0.37943	3.04082	3.8089	YES1
PTEN Regulation R-HSA-6807070	Reactome	1/139	0.294707	0.389143	2.9299	3.57968	MECOM
Diseases Of Glycosylation R-HSA-3781865	Reactome	1/143	0.301783	0.394845	2.8468	3.41059	CHST14
RHO GTPase Cycle R-HSA-9012999	Reactome	2/441	0.302329	0.394845	1.85184	2.21524	JAG1;DLG5
G2/M Checkpoints R-HSA-69481	Reactome	1/148	0.31053	0.403352	2.74927	3.2152	CHEK2
Signaling By Interleukins R-HSA-449147	Reactome	2/453	0.313444	0.404936	1.80146	2.08993	SMAD3;YES1
Interleukin-1 Family Signaling R-HSA-446652	Reactome	1/152	0.317451	0.407907	2.6759	3.07042	SMAD3
Cellular Response To Starvation R-HSA-9711097	Reactome	1/153	0.31917	0.407923	2.65816	3.03571	EIF2AK4
Regulation Of TP53 Activity R-HSA-5633007	Reactome	1/157	0.326005	0.414443	2.58948	2.9024	CHEK2
Anti-inflammatory Response Favoring Leishmania Infection R-HSA-9662851	Reactome	1/165	0.339475	0.429283	2.46217	2.66002	YES1
RAC1 GTPase Cycle R-HSA-9013149	Reactome	1/178	0.360803	0.453493	2.27983	2.32412	JAG1
Major Pathway Of rRNA Processing In Nucleolus And Cytosol R-HSA-6791226	Reactome	1/179	0.362415	0.453493	2.26691	2.30084	MPHOSPH6
Neurotransmitter Receptors And Postsynaptic Signal Transmission R-HSA-112314	Reactome	1/182	0.367228	0.457123	2.229	2.23295	NRG1
Metabolism Of Vitamins And Cofactors R-HSA-196854	Reactome	1/186	0.37359	0.462633	2.18036	2.14678	MTHFR
Cell Cycle, Mitotic R-HSA-69278	Reactome	2/523	0.377391	0.463686	1.55382	1.51416	HAUS6;SDCCAG8
rRNA Processing In Nucleus And Cytosol R-HSA-8868773	Reactome	1/189	0.378321	0.463686	2.14525	2.08521	MPHOSPH6
Peptide Ligand-Binding Receptors R-HSA-375276	Reactome	1/196	0.389223	0.47193	2.0675	1.9509	GPR37
Muscle Contraction R-HSA-397014	Reactome	1/196	0.389223	0.47193	2.0675	1.9509	TMOD1
TCF Dependent Signaling In Response To WNT R-HSA-201681	Reactome	1/198	0.392303	0.47193	2.04631	1.91477	TERT
rRNA Processing R-HSA-72312	Reactome	1/199	0.393838	0.47193	2.03587	1.89706	MPHOSPH6
Interferon Signaling R-HSA-913531	Reactome	1/200	0.395368	0.47193	2.02554	1.87957	TRIM14
Ub-specific Processing Proteases R-HSA-5689880	Reactome	1/201	0.396895	0.47193	2.01531	1.86231	SMAD3
Phospholipid Metabolism R-HSA-1483257	Reactome	1/208	0.407478	0.482115	1.94647	1.74748	CHEK2
Hemostasis R-HSA-109582	Reactome	2/576	0.424263	0.499502	1.4065	1.20594	TGFB2;YES1
Transmission Across Chemical Synapses R-HSA-112315	Reactome	1/246	0.461828	0.53739	1.6414	1.26809	NRG1
Leishmania Infection R-HSA-9658195	Reactome	1/247	0.46319	0.53739	1.63464	1.25805	YES1
Diseases Of Metabolism R-HSA-5668914	Reactome	1/247	0.46319	0.53739	1.63464	1.25805	CHST14
Platelet Activation, Signaling And Aggregation R-HSA-76002	Reactome	1/254	0.472631	0.545695	1.58885	1.19075	TGFB2
Signaling By Rho GTPases R-HSA-194315	Reactome	2/644	0.481741	0.553539	1.25312	0.91521	JAG1;DLG5
Signaling By Rho GTPases, Miro GTPases And RHOBTB3 R-HSA-9716542	Reactome	2/660	0.494772	0.560559	1.22163	0.859611	JAG1;DLG5
RAF/MAP Kinase Cascade R-HSA-5673001	Reactome	1/271	0.494887	0.560559	1.48753	1.04637	NRG1
Cell Cycle Checkpoints R-HSA-69620	Reactome	1/271	0.494887	0.560559	1.48753	1.04637	CHEK2
MAPK1/MAPK3 Signaling R-HSA-5684996	Reactome	1/277	0.50252	0.566521	1.45475	1.00104	NRG1
Deubiquitination R-HSA-5688426	Reactome	1/279	0.50504	0.566688	1.44413	0.986515	SMAD3
Asparagine N-linked Glycosylation R-HSA-446203	Reactome	1/282	0.508795	0.568234	1.4285	0.965251	NANS
Metabolism Of Carbohydrates R-HSA-71387	Reactome	1/285	0.512522	0.569734	1.41319	0.944594	CHST14
Extracellular Matrix Organization R-HSA-1474244	Reactome	1/291	0.519894	0.575253	1.38353	0.90501	TGFB2
Signaling By WNT R-HSA-195721	Reactome	1/294	0.523539	0.576617	1.36916	0.886042	TERT
G Alpha (I) Signaling Events R-HSA-418594	Reactome	1/312	0.544846	0.597331	1.28873	0.782587	GPR37
MAPK Family Signaling Cascades R-HSA-5683057	Reactome	1/318	0.551738	0.602125	1.26395	0.75165	NRG1
Class A/1 (Rhodopsin-like Receptors) R-HSA-373076	Reactome	1/327	0.561885	0.610412	1.2285	0.708176	GPR37
Transcriptional Regulation By TP53 R-HSA-3700989	Reactome	1/354	0.590996	0.639131	1.13297	0.595882	CHEK2
Neuronal System R-HSA-112316	Reactome	1/386	0.623049	0.67076	1.03711	0.490687	NRG1
GPCR Ligand Binding R-HSA-500792	Reactome	1/458	0.686435	0.735686	0.870495	0.327518	GPR37
Axon Guidance R-HSA-422475	Reactome	1/519	0.731865	0.780873	0.765582	0.238984	YES1
Nervous System Development R-HSA-9675108	Reactome	1/545	0.749206	0.795823	0.728016	0.210208	YES1
Developmental Biology R-HSA-1266738	Reactome	2/1073	0.756986	0.80053	0.734477	0.204486	SMAD3;YES1
GPCR Downstream Signaling R-HSA-388396	Reactome	1/619	0.792766	0.834675	0.638399	0.148253	GPR37
Metabolism Of RNA R-HSA-8953854	Reactome	1/666	0.816485	0.855877	0.591837	0.119993	MPHOSPH6
Signaling By GPCR R-HSA-372790	Reactome	1/689	0.827102	0.86322	0.571369	0.108462	GPR37
Cellular Responses To Stress R-HSA-2262752	Reactome	1/722	0.84129	0.868769	0.544284	0.0940625	EIF2AK4
Metabolism Of Lipids R-HSA-556833	Reactome	1/732	0.845359	0.868769	0.536559	0.0901383	CHEK2
Adaptive Immune System R-HSA-1280218	Reactome	1/733	0.845761	0.868769	0.535798	0.0897562	YES1
Cellular Responses To Stimuli R-HSA-8953897	Reactome	1/736	0.846959	0.868769	0.533528	0.0886208	EIF2AK4
Post-translational Protein Modification R-HSA-597592	Reactome	2/1383	0.869282	0.887857	0.560252	0.0784843	SMAD3;NANS
Immune System R-HSA-168256	Reactome	3/1943	0.87618	0.891093	0.592564	0.0783275	SMAD3;YES1;TRIM14
Metabolism R-HSA-1430728	Reactome	3/2049	0.89835	0.909769	0.558557	0.0598751	CHEK2;MTHFR;CHST14
Infectious Disease R-HSA-5663205	Reactome	1/961	0.91501	0.922731	0.403699	0.0358568	YES1
Innate Immune System R-HSA-168249	Reactome	1/1035	0.930064	0.933972	0.373347	0.0270682	YES1
Metabolism Of Proteins R-HSA-392499	Reactome	2/1890	0.956718	0.956718	0.398614	0.0176374	SMAD3;NANS
Neovascularisation Processes WP4331	Wiki	3/37	0.000107589	0.0160307	37.3892	341.633	TGFB2;JAG1;SMAD3
Pancreatic Adenocarcinoma Pathway WP4263	Wiki	3/89	0.00143529	0.0675282	14.7432	96.5147	TGFB2;SMAD3;RAD51
NRF2 ARE Regulation WP4357	Wiki	2/23	0.0014985	0.0675282	39.5417	257.151	YES1;INSR
Extracellular Vesicle Mediated Signaling In Recipient Cells WP2870	Wiki	2/30	0.00254788	0.0675282	29.6458	177.06	TGFB2;SMAD3
CKAP4 Signaling Pathway Map WP5322	Wiki	3/109	0.00256199	0.0675282	11.9494	71.3018	TGFB2;SMAD3;CHEK2
16P11 2 Distal Deletion Syndrome WP4950	Wiki	2/31	0.00271926	0.0675282	28.6221	169.082	INSR;SDCCAG8
Cell Cycle WP179	Wiki	3/120	0.00336204	0.0715634	10.82	61.622	TGFB2;SMAD3;CHEK2
Ovarian Infertility WP34	Wiki	2/37	0.00385763	0.0718484	23.7083	131.764	SMAD3;RAD51
ATM Signaling Pathway WP2516	Wiki	2/40	0.00449642	0.0732627	21.8333	117.998	RAD51;CHEK2
Neuroinflammation And Glutamatergic Signaling WP5083	Wiki	3/140	0.00517427	0.0732627	9.23109	48.593	TGFB2;SMAD3;INSR
Integrated Cancer Pathway WP1971	Wiki	2/44	0.00541877	0.0732627	19.75	103.053	SMAD3;CHEK2
Envelope Proteins And Their Potential Roles In EDMD Physiopathology WP4535	Wiki	2/46	0.00590974	0.0732627	18.8504	96.7242	TGFB2;SMAD3
Vitamin B12 Metabolism WP1533	Wiki	2/50	0.0069503	0.0732627	17.276	85.8441	INSR;MTHFR
Epithelial To Mesenchymal Transition In Colorectal Cancer WP4239	Wiki	3/160	0.00747934	0.0732627	8.04703	39.3951	TGFB2;SMAD3;JAG1
NRP1 Triggered Signaling Pathways In Pancreatic Cancer WP5144	Wiki	2/53	0.00778121	0.0732627	16.2574	78.9464	TGFB2;SMAD3
Overlap Between Signal Transduction Pathways Contributing To LMNA Laminopathies WP4879	Wiki	2/55	0.00835883	0.0732627	15.6423	74.8396	TGFB2;SMAD3
DNA IR Double Strand Breaks And Cellular Response Via ATM WP3959	Wiki	2/55	0.00835883	0.0732627	15.6423	74.8396	RAD51;CHEK2
Lung Fibrosis WP3624	Wiki	2/63	0.0108545	0.0874723	13.5854	61.4491	STN1;TERT
AGE RAGE Pathway WP2324	Wiki	2/66	0.0118651	0.0874723	12.9466	57.4073	SMAD3;INSR
Folate Metabolism WP176	Wiki	2/68	0.0125609	0.0874723	12.553	54.9467	INSR;MTHFR
DNA Damage Response WP707	Wiki	2/69	0.0129154	0.0874723	12.365	53.7798	RAD51;CHEK2
miRNA Regulation Of DNA Damage Response WP1530	Wiki	2/69	0.0129154	0.0874723	12.365	53.7798	RAD51;CHEK2
Chromosomal And Microsatellite Instability In Colorectal Cancer WP4216	Wiki	2/73	0.0143765	0.0915886	11.6661	49.4894	TGFB2;SMAD3
Burn Wound Healing WP5055	Wiki	2/74	0.0147525	0.0915886	11.5035	48.5026	TGFB2;SMAD3
DNA IR Damage And Cellular Response Via ATR WP4016	Wiki	2/81	0.0175017	0.10431	10.4805	42.3984	RAD51;CHEK2
Selenium Micronutrient Network WP15	Wiki	2/86	0.0195881	0.105519	9.85417	38.7548	INSR;MTHFR
Insulin Signaling In Adipocytes Normal Condition WP3634	Wiki	1/8	0.0198292	0.105519	58.1429	227.955	INSR
Insulin Signaling In Adipocytes Diabetic Condition WP3635	Wiki	1/8	0.0198292	0.105519	58.1429	227.955	INSR
Folate Alcohol And Cancer Pathway Hypotheses WP1589	Wiki	1/9	0.0222806	0.114476	50.8724	193.521	MTHFR
Hippo Signaling Regulation Pathways WP4540	Wiki	2/98	0.0249949	0.124141	8.61719	31.7895	SMAD3;INSR
TGF Smad Signaling Pathway WP5382	Wiki	1/12	0.0295988	0.138722	36.9926	130.215	SMAD3
Androgen Receptor Network In Prostate Cancer WP2263	Wiki	2/109	0.0304217	0.138722	7.72702	26.9874	SMAD3;CHEK2
DNA Damage Response Only ATM Dependent WP710	Wiki	2/110	0.0309363	0.138722	7.65509	26.6078	SMAD3;INSR
Homologous Recombination WP186	Wiki	1/13	0.0320262	0.138722	33.9082	116.685	RAD51
Gastrin Signaling Pathway WP4659	Wiki	2/115	0.0335614	0.138722	7.31453	24.8283	YES1;JAG1
H19 Action Rb E2F1 Signaling And CDK Beta Catenin Activity WP3969	Wiki	1/14	0.0344477	0.138722	31.2983	105.422	JAG1
6Q16 Copy Number Variation WP5400	Wiki	1/14	0.0344477	0.138722	31.2983	105.422	INSR
Mammary Gland Development Pathway Embryonic Development Stage 1 Of 4 WP2813	Wiki	1/15	0.0368633	0.139726	29.0612	95.9177	TERT
TGF Beta Signaling In Thyroid Cells For Epithelial Mesenchymal Transition WP3859	Wiki	1/17	0.0416767	0.139726	25.426	80.7992	SMAD3
Canonical And Non Canonical TGF B Signaling WP3874	Wiki	1/17	0.0416767	0.139726	25.426	80.7992	SMAD3
Leptin Insulin Signaling Overlap WP3935	Wiki	1/17	0.0416767	0.139726	25.426	80.7992	INSR
Platelet Mediated Interactions With Vascular And Circulating Cells WP4462	Wiki	1/17	0.0416767	0.139726	25.426	80.7992	TGFB2
NOTCH1 Regulation Of Endothelial Cell Calcification WP3413	Wiki	1/17	0.0416767	0.139726	25.426	80.7992	JAG1
Amplification And Expansion Of Oncogenic Pathways As Metastatic Traits WP3678	Wiki	1/17	0.0416767	0.139726	25.426	80.7992	JAG1
TGF Beta Signaling Pathway WP366	Wiki	2/132	0.0431023	0.139726	6.35256	19.9736	SMAD3;TERT
Nephrogenesis WP5052	Wiki	1/18	0.0440745	0.139726	23.9292	74.7039	JAG1
Proteoglycan Biosynthesis WP4784	Wiki	1/18	0.0440745	0.139726	23.9292	74.7039	CHST14
Disorders Of Folate Metabolism And Transport WP4259	Wiki	1/19	0.0464665	0.1438	22.5986	69.3558	MTHFR
NRF2 Pathway WP2884	Wiki	2/141	0.048516	0.1438	5.93855	17.9692	TGFB2;NRG1
Male Infertility WP4673	Wiki	2/145	0.050998	0.1438	5.77127	17.1751	INSR;MTHFR
Type II Diabetes Mellitus WP1584	Wiki	1/21	0.0512328	0.1438	20.3367	60.4281	INSR
Progeria Associated Lipodystrophy WP5103	Wiki	1/22	0.0536072	0.1438	19.3673	56.6702	SMAD3
Vitamin D In Inflammatory Diseases WP4482	Wiki	1/22	0.0536072	0.1438	19.3673	56.6702	SMAD3
Transcription Factor Regulation In Adipogenesis WP3599	Wiki	1/22	0.0536072	0.1438	19.3673	56.6702	INSR
Hepatitis B Infection WP4666	Wiki	2/150	0.0541637	0.1438	5.57489	16.255	TGFB2;SMAD3
Kynurenine Pathway And Links To Cell Senescence WP5044	Wiki	1/23	0.0559758	0.1438	18.4861	53.2924	EIF2AK4
Nanoparticle Triggered Autophagic Cell Death WP2509	Wiki	1/23	0.0559758	0.1438	18.4861	53.2924	INSR
Roles Of Ceramides In Development Of Insulin Resistance WP5181	Wiki	1/23	0.0559758	0.1438	18.4861	53.2924	INSR
miRNA Regulation Of P53 Pathway In Prostate Cancer WP3982	Wiki	1/24	0.0583386	0.144874	17.6815	50.2417	CHEK2
MTHFR Deficiency WP4288	Wiki	1/24	0.0583386	0.144874	17.6815	50.2417	MTHFR
Thyroxine Thyroid Hormone Production WP1981	Wiki	1/25	0.0606955	0.145865	16.9439	47.4748	TG
Hypothesized Pathways In Pathogenesis Of Cardiovascular Disease WP3668	Wiki	1/25	0.0606955	0.145865	16.9439	47.4748	SMAD3
Growth Factors And Hormones In Beta Cell Proliferation WP5385	Wiki	1/26	0.0630467	0.148412	16.2653	44.9553	INSR
Canonical And Non Canonical Notch Signaling WP3845	Wiki	1/27	0.0653922	0.148412	15.6389	42.6529	JAG1
Primary Ovarian Insufficiency WP5316	Wiki	2/170	0.0674885	0.148412	4.90625	13.2263	TG;RAD51
Angiotensin II Receptor Type 1 Pathway WP5036	Wiki	1/28	0.0677318	0.148412	15.059	40.5417	SMAD3
Sphingolipid Metabolism In Senescence WP5121	Wiki	1/28	0.0677318	0.148412	15.059	40.5417	TERT
Interactions Between Immune Cells And microRNAs In Tumor Microenvironment WP4559	Wiki	1/28	0.0677318	0.148412	15.059	40.5417	TGFB2
One Carbon Metabolism WP241	Wiki	1/29	0.0700658	0.14914	14.5204	38.5999	MTHFR
Selective Expression Of Chemokine Receptors During T Cell Polarization WP4494	Wiki	1/29	0.0700658	0.14914	14.5204	38.5999	TGFB2
Ethanol Effects On Histone Modifications WP3996	Wiki	1/31	0.0747165	0.156799	13.551	35.1521	MTHFR
White Fat Cell Differentiation WP4149	Wiki	1/32	0.0770333	0.157631	13.1132	33.616	MECOM
Vitamin D Receptor Pathway WP2877	Wiki	2/186	0.0788471	0.157631	4.476	11.3701	TGFB2;ZNF257
Fluoropyrimidine Activity WP1601	Wiki	1/33	0.0793444	0.157631	12.7028	32.1884	MTHFR
Signal Transduction Through IL1R WP4496	Wiki	1/33	0.0793444	0.157631	12.7028	32.1884	TGFB2
Type 2 Papillary Renal Cell Carcinoma WP4241	Wiki	1/34	0.0816498	0.160077	12.3173	30.8586	TGFB2
P38 MAPK Signaling Pathway WP400	Wiki	1/35	0.0839496	0.162448	11.9544	29.6174	TGFB2
Factors And Pathways Affecting Insulin Like Growth Factor IGF1 Akt Signaling WP3850	Wiki	1/36	0.0862437	0.164748	11.6122	28.4567	SMAD3
Parkinson 39 S Disease Pathway WP2371	Wiki	1/38	0.0908151	0.169143	10.9835	26.3485	GPR37
Striated Muscle Contraction Pathway WP383	Wiki	1/38	0.0908151	0.169143	10.9835	26.3485	TMOD1
Immune Infiltration In Pancreatic Cancer WP5285	Wiki	1/39	0.0930924	0.171244	10.6939	25.389	TGFB2
Thymic Stromal Lymphopoietin TSLP Signaling Pathway WP2203	Wiki	1/40	0.0953641	0.173284	10.4192	24.4856	YES1
Glycosaminoglycan Synthesis In Fibroblasts WP5395	Wiki	1/41	0.0976302	0.175264	10.1582	23.6337	CHST14
Interleukin 11 Signaling Pathway WP2332	Wiki	1/44	0.104395	0.182999	9.44803	21.3485	YES1
Notch Signaling WP268	Wiki	1/44	0.104395	0.182999	9.44803	21.3485	JAG1
ATM Signaling In Development And Disease WP3878	Wiki	1/45	0.106639	0.184759	9.23284	20.6659	CHEK2
T Cell Modulation In Pancreatic Cancer WP5078	Wiki	1/46	0.108878	0.186469	9.02721	20.0181	TGFB2
Hepatitis C And Hepatocellular Carcinoma WP3646	Wiki	1/49	0.11556	0.195664	8.46173	18.2601	SMAD3
8P23 1 Copy Number Variation Syndrome WP5346	Wiki	1/52	0.122193	0.200656	7.96279	16.739	TERT
One Carbon Metabolism And Related Pathways WP3940	Wiki	1/53	0.124393	0.200656	7.80926	16.2769	MTHFR
Cardiac Progenitor Differentiation WP2406	Wiki	1/53	0.124393	0.200656	7.80926	16.2769	NRG1
Apoptosis Related Network Due To Altered Notch3 In Ovarian Cancer WP2864	Wiki	1/53	0.124393	0.200656	7.80926	16.2769	NRG1
TGF Beta Receptor Signaling WP560	Wiki	1/54	0.126588	0.200656	7.66153	15.835	SMAD3
Notch Signaling Pathway WP61	Wiki	1/54	0.126588	0.200656	7.66153	15.835	JAG1
Cardiac Hypertrophic Response WP2795	Wiki	1/55	0.128778	0.201978	7.51927	15.412	NRG1
TGF Beta Receptor Signaling In Skeletal Dysplasias WP4816	Wiki	1/58	0.135314	0.210018	7.12245	14.246	SMAD3
Markers Of Kidney Cell Lineage WP5236	Wiki	1/59	0.137482	0.210172	6.9993	13.8884	JAG1
Development Of Ureteric Collection System WP5053	Wiki	1/60	0.139645	0.210172	6.88032	13.545	TGFB2
2Q13 Copy Number Variation Syndrome WP5222	Wiki	1/60	0.139645	0.210172	6.88032	13.545	POLR1C
Endochondral Ossification WP474	Wiki	1/63	0.146101	0.215535	6.54641	12.5918	TGFB2
Endochondral Ossification With Skeletal Dysplasias WP4808	Wiki	1/63	0.146101	0.215535	6.54641	12.5918	TGFB2
Pathways Affected In Adenoid Cystic Carcinoma WP3651	Wiki	1/65	0.150378	0.21967	6.3412	12.014	CHEK2
SARS CoV 2 Innate Immunity Evasion And Cell Specific Immune Response WP5039	Wiki	1/66	0.152509	0.220345	6.24333	11.7408	SMAD3
AMP Activated Protein Kinase Signaling WP1403	Wiki	1/67	0.154635	0.220345	6.14842	11.4772	INSR
Trans Sulfuration One Carbon Metabolism And Related Pathways WP2525	Wiki	1/68	0.156756	0.220345	6.05635	11.2228	MTHFR
RAC1 PAK1 P38 MMP2 Pathway WP3303	Wiki	1/68	0.156756	0.220345	6.05635	11.2228	RAD51
Urotensin II Mediated Signaling Pathway WP5158	Wiki	1/69	0.158871	0.221232	5.96699	10.9772	SMAD3
Parkin Ubiquitin Proteasomal System Pathway WP2359	Wiki	1/71	0.163086	0.224998	5.79592	10.5108	GPR37
Primary Focal Segmental Glomerulosclerosis FSGS WP2572	Wiki	1/72	0.165186	0.225322	5.714	10.2891	JAG1
Head And Neck Squamous Cell Carcinoma WP4674	Wiki	1/73	0.16728	0.225322	5.63435	10.0747	TERT
Cytosolic DNA Sensing Pathway WP4655	Wiki	1/74	0.16937	0.225322	5.55689	9.86721	POLR1C
Disturbed Pathways In Duchenne Muscular Dystrophy WP5356	Wiki	1/74	0.16937	0.225322	5.55689	9.86721	SMAD3
Nuclear Receptors Meta Pathway WP2882	Wiki	2/314	0.1851	0.242976	2.6226	4.42394	TGFB2;NRG1
A Network Map Of Macrophage Stimulating Protein MSP Signaling WP5353	Wiki	1/82	0.185901	0.242976	5.00605	8.42288	SMAD3
MicroRNAs In Cardiomyocyte Hypertrophy WP1544	Wiki	1/83	0.187945	0.243511	4.94475	8.26568	NRG1
EGFR Tyrosine Kinase Inhibitor Resistance WP4806	Wiki	1/84	0.189983	0.24403	4.88493	8.11298	NRG1
Clear Cell Renal Cell Carcinoma Pathways WP4018	Wiki	1/85	0.192017	0.244534	4.82653	7.9646	TGFB2
Androgen Receptor Signaling Pathway WP138	Wiki	1/87	0.196069	0.247579	4.71381	7.68016	SMAD3
Bardet Biedl Syndrome WP5234	Wiki	1/88	0.198088	0.248026	4.65939	7.54377	SDCCAG8
ErbB Signaling Pathway WP673	Wiki	1/90	0.20211	0.250953	4.55423	7.28196	NRG1
Thyroid Hormones Production And Peripheral Downstream Signaling Effects WP4746	Wiki	1/93	0.208106	0.256263	4.40506	6.91464	TG
1P36 Copy Number Variation Syndrome WP5345	Wiki	1/94	0.210095	0.256592	4.35747	6.7985	SMAD3
7Q11 23 Copy Number Variation Syndrome WP4932	Wiki	1/104	0.229718	0.276032	3.93244	5.78423	NRG1
NF1 Copy Number Variation Syndrome WP5366	Wiki	1/104	0.229718	0.276032	3.93244	5.78423	RAD51
Complement System In Neuronal Development And Plasticity WP5090	Wiki	1/106	0.233585	0.278433	3.85714	5.6091	TGFB2
Osteoblast Differentiation And Related Diseases WP4787	Wiki	1/118	0.256389	0.302801	3.45945	4.70851	JAG1
DNA Repair Pathways Full Network WP4946	Wiki	1/120	0.260124	0.302801	3.40096	4.57972	RAD51
Hippo Merlin Signaling Dysregulation WP4541	Wiki	1/120	0.260124	0.302801	3.40096	4.57972	INSR
Adipogenesis WP236	Wiki	1/131	0.280343	0.323392	3.11146	3.95697	SMAD3
Angiopoietin Like Protein 8 Regulatory Pathway WP3915	Wiki	1/132	0.282154	0.323392	3.08755	3.90668	INSR
Measles Virus Infection WP4630	Wiki	1/136	0.289354	0.329112	2.99546	3.71469	EIF2AK4
VEGFA VEGFR2 Signaling WP3888	Wiki	2/430	0.292118	0.32974	1.90051	2.33876	TMOD1;JAG1
Endoderm Differentiation WP2853	Wiki	1/140	0.296482	0.332046	2.90868	3.53627	SMAD3
Pleural Mesothelioma WP5087	Wiki	2/437	0.298618	0.332046	1.86925	2.25916	TERT;INSR
Mesodermal Commitment Pathway WP2857	Wiki	1/145	0.305295	0.336955	2.80697	3.33041	SMAD3
Breast Cancer Pathway WP4262	Wiki	1/154	0.320885	0.348992	2.64066	3.00156	RAD51
Nonalcoholic Fatty Liver Disease WP4396	Wiki	1/154	0.320885	0.348992	2.64066	3.00156	INSR
Insulin Signaling WP481	Wiki	1/160	0.331088	0.357479	2.54024	2.80791	INSR
Metapathway Biotransformation Phase I And II WP702	Wiki	1/184	0.370417	0.391434	2.20442	2.18926	CHST14
Ras Signaling WP4223	Wiki	1/184	0.370417	0.391434	2.20442	2.18926	INSR
Ciliopathies WP4803	Wiki	1/184	0.370417	0.391434	2.20442	2.18926	SDCCAG8
Ciliary Landscape WP4352	Wiki	1/213	0.414925	0.435379	1.90008	1.67142	CEP170
IL 24 Signaling Pathway WP5413	Wiki	1/232	0.442398	0.46096	1.74212	1.42078	CHEK2
MAPK Signaling Pathway WP382	Wiki	1/246	0.461828	0.477863	1.6414	1.26809	TGFB2
GPCRs Class A Rhodopsin Like WP455	Wiki	1/259	0.479275	0.487132	1.55766	1.14563	GPR37
Alzheimer 39 S Disease And miRNA Effects WP2059	Wiki	1/260	0.480594	0.487132	1.55157	1.13689	INSR
Alzheimer 39 S Disease WP5124	Wiki	1/260	0.480594	0.487132	1.55157	1.13689	INSR
Focal Adhesion PI3K Akt mTOR Signaling Pathway WP3932	Wiki	1/302	0.533127	0.536729	1.33223	0.837965	INSR
PI3K Akt Signaling Pathway WP4172	Wiki	1/338	0.573982	0.573982	1.18773	0.659377	INSR
